# Supplementary material
Source: PubMed Central journal article supplement (PMC2978642)
Supplement: NIHMS243682-supplement-SupplData.pdf [file NIHMS243682-supplement-SupplData.pdf]

## Supplementary Data Summary

The summary data are in four tables.

Table 1 contains the 392 probe sets that are differentially expressed among the four treatment groups. The file contains the Affymetrix Probe Set ID, the gene symbol (if known), complete gene title (if known), ratio of OVA to OVAc normalized signal intensity and ratio of TMA to TMAc normalized signal intensity.

Table 2 contains the 62 genes that are significantly up-regulated in each of three different asthma models with three different allergens: OVA, TMA and *Aspergillus* (this study and Zimmermann *et al.*, 2003). The file contains the Affymetrix Probe Set ID and the gene name.

Table 3 contains the averaged, normalized signal intensities for the 12, 422 probe sets on the Affymetrix MG\_U74Av2 GeneChip. The file contains the Affymetrix Probe Set ID, the q-value from the F test, the geometric mean of the normalized  $\log_2$  transformed signal intensities for each of the 4 treatment groups (OVAc, OVA, TMAc, and TMA).

Table 4 contains a subset of the probe sets that are up-regulated in the TMA-induced asthma model. The file contains the functional classification, the gene name, the Affymetrix Probe Set ID and the expression ratio for TMA/TMAc.

**Supplementary Table 1. 392 Probe Sets with Significant Expression Differences within the 4 Treatment Groups (OVAc, OVA, TMAc, and TMA). Probe Sets Uniquely Up-regulated (ratio > 1.2) or Uniquely Down-regulated (ratio <0.83) are Included.**

| Affymetrix<br>Probe Set ID | Gene Symbol  | Title                                                                                                                                                       | Ratio OVA vs<br>OVAc | Ratio TMA vs<br>TMAc |
|----------------------------|--------------|-------------------------------------------------------------------------------------------------------------------------------------------------------------|----------------------|----------------------|
| 101870_at                  | Igh-4        | immunoglobulin heavy chain 4 (serum IgG1)                                                                                                                   | 4.49                 | 1.20                 |
| 160509_at                  | Chia-pending | chitinase, acidic                                                                                                                                           | 5.91                 | 1.87                 |
| 102372_at                  | Igj          | immunoglobulin joining chain                                                                                                                                | 2.24                 | 1.31                 |
| 92316_f_at                 | LOC207685    | hypothetical protein LOC207685                                                                                                                              | 2.36                 | 1.38                 |
| 92459_at                   | Ccl8         | chemokine (C-C motif) ligand 8                                                                                                                              | 12.40                | 2.73                 |
| 102585_f_at                | Igk-V8       | immunoglobulin kappa chain variable 8 (V8)                                                                                                                  | 2.74                 | 1.27                 |
| 101640_f_at                | Igk-V8       | immunoglobulin kappa chain variable 8 (V8)                                                                                                                  | 2.88                 | 1.42                 |
| 97566_f_at                 | Igk-V8       | immunoglobulin kappa chain variable 8 (V8)                                                                                                                  | 2.56                 | 1.33                 |
| 97567_f_at                 | Igk-V8       | immunoglobulin kappa chain variable 8 (V8)                                                                                                                  | 2.69                 | 1.27                 |
| 96972_f_at                 | Igk-V8       | immunoglobulin kappa chain variable 8 (V8)                                                                                                                  | 2.65                 | 1.37                 |
| 102156_f_at                | ---          | ---                                                                                                                                                         | 2.36                 | 1.47                 |
| 93086_at                   | Igk-V8       | immunoglobulin kappa chain variable 8 (V8)                                                                                                                  | 1.91                 | 1.29                 |
| 92223_at                   | C1qg         | complement component 1, q subcomponent, gamma polypeptide                                                                                                   | 2.38                 | 1.26                 |
| 101803_at                  | ---          | ---                                                                                                                                                         | 2.42                 | 1.23                 |
| 102860_at                  | Serpina3g    | serine (or cysteine) proteinase inhibitor, clade A, member 3G                                                                                               | 2.87                 | 1.35                 |
| 101718_f_at                | Igk-V8       | immunoglobulin kappa chain variable 8 (V8)                                                                                                                  | 2.70                 | 1.32                 |
| 102076_at                  | Igk-V8       | immunoglobulin kappa chain variable 8 (V8)                                                                                                                  | 2.39                 | 1.27                 |
| 162287_r_at                | ---          | Mus musculus transcribed sequence with weak similarity to protein ref:NP_001276.1 (H.sapiens) calcium activated chloride channel 1 precursor [Homo sapiens] | 9.16                 | 18.47                |
| 94725_f_at                 | ---          | ---                                                                                                                                                         | 2.93                 | 1.40                 |
| 93584_at                   | Igh-6        | immunoglobulin heavy chain 6 (heavy chain of IgM)                                                                                                           | 1.62                 | 1.29                 |
| 98562_at                   | C1qa         | complement component 1, q subcomponent, alpha polypeptide                                                                                                   | 2.19                 | 1.32                 |
| 99405_at                   | Igk-V8       | immunoglobulin kappa chain variable 8 (V8)                                                                                                                  | 4.01                 | 1.26                 |
| 93497_at                   | C3           | complement component 3                                                                                                                                      | 1.74                 | 1.27                 |
| 102157_f_at                | Igk-V8       | immunoglobulin kappa chain variable 8 (V8)                                                                                                                  | 2.33                 | 1.24                 |

| Affymetrix<br>Probe Set ID | Gene Symbol | Title                                                                             | Ratio OVA vs<br>OVAc | Ratio TMA vs<br>TMAc |
|----------------------------|-------------|-----------------------------------------------------------------------------------|----------------------|----------------------|
| 96971_f_at                 | ---         | ---                                                                               | 2.46                 | 1.36                 |
| 96336_at                   | Gatm        | glycine amidinotransferase (L-arginine:glycine<br>amidinotransferase)             | 2.50                 | 1.25                 |
| 100721_f_at                | LOC56304    | recombinant antineuraminidase single chain Ig VH and VL<br>domains                | 2.84                 | 1.22                 |
| 101331_f_at                | Igk-V8      | immunoglobulin kappa chain variable 8 (V8)                                        | 2.72                 | 1.25                 |
| 93302_at                   | Tff2        | trefoil factor 2 (spasmolytic protein 1)                                          | 3.25                 | 2.07                 |
| 93583_s_at                 | Igh-6       | immunoglobulin heavy chain 6 (heavy chain of IgM)                                 | 2.49                 | 1.74                 |
| 161968_f_at                | Ccr5        | chemokine (C-C motif) receptor 5                                                  | 2.62                 | 1.44                 |
| 96020_at                   | C1qb        | complement component 1, q subcomponent, beta<br>polypeptide                       | 2.78                 | 1.57                 |
| 102337_s_at                | Fcgr2b      | Fc receptor, IgG, low affinity IIb                                                | 2.76                 | 1.54                 |
| 93638_s_at                 | Igl-V1      | immunoglobulin lambda chain, variable 1                                           | 2.60                 | 1.31                 |
| 99446_at                   | Ms4a1       | membrane-spanning 4-domains, subfamily A, member 1                                | 1.45                 | 1.22                 |
| 100772_g_at                | Blnk        | B-cell linker                                                                     | 1.38                 | 1.22                 |
| 92642_at                   | Car2        | carbonic anhydrase 2                                                              | 1.45                 | 1.29                 |
| 100156_at                  | Mcm5        | minichromosome maintenance deficient 5, cell division cycle<br>46 (S. cerevisiae) | 1.45                 | 1.25                 |
| 97444_at                   | Ifi30       | interferon gamma inducible protein 30                                             | 1.61                 | 1.34                 |
| 103040_at                  | Cd83        | CD83 antigen                                                                      | 1.53                 | 1.34                 |
| 160876_at                  | Bcap29      | B-cell receptor-associated protein 29                                             | 1.56                 | 1.33                 |
| 93261_at                   | Lgmn        | legumain                                                                          | 1.33                 | 1.24                 |
| 92587_at                   | Fdx1        | ferredoxin 1                                                                      | 1.22                 | 1.22                 |
| 94425_at                   | Ly86        | lymphocyte antigen 86                                                             | 1.64                 | 1.44                 |
| 102712_at                  | Saa3        | serum amyloid A 3                                                                 | 2.16                 | 1.74                 |
| 103977_at                  | F10         | coagulation factor X                                                              | 1.56                 | 1.25                 |
| 102381_at                  | Facl4       | fatty acid-Coenzyme A ligase, long chain 4                                        | 1.29                 | 1.27                 |
| 160815_at                  | BC032204    | cDNA sequence BC032204                                                            | 1.28                 | 1.28                 |
| 101878_at                  | Cd72        | CD72 antigen                                                                      | 1.55                 | 1.33                 |
| 94285_at                   | H2-Eb1      | histocompatibility 2, class II antigen E beta                                     | 1.37                 | 1.32                 |
| 103226_at                  | Mrc1        | mannose receptor, C type 1                                                        | 1.62                 | 1.33                 |

| Affymetrix<br>Probe Set ID | Gene Symbol   | Title                                                                                   | Ratio OVA vs<br>OVAc | Ratio TMA vs<br>TMAc |
|----------------------------|---------------|-----------------------------------------------------------------------------------------|----------------------|----------------------|
| 92866_at                   | H2-Aa         | histocompatibility 2, class II antigen A, alpha                                         | 1.29                 | 1.35                 |
| 97327_at                   | Fen1          | flap structure specific endonuclease 1                                                  | 1.23                 | 1.26                 |
| 95339_r_at                 | Mmp12         | matrix metalloproteinase 12                                                             | 2.63                 | 2.00                 |
| 104477_at                  | ---           | Mus musculus transcribed sequences                                                      | 1.26                 | 1.27                 |
| 104388_at                  | Ccl9          | chemokine (C-C motif) ligand 9                                                          | 2.58                 | 1.82                 |
| 161898_i_at                | Mtx1          | metaxin 1                                                                               | 1.52                 | 1.21                 |
| 99461_at                   | Hcls1         | hematopoietic cell specific Lyn substrate 1                                             | 1.33                 | 1.20                 |
| 100116_at                  | 2810417H13Rik | RIKEN cDNA 2810417H13 gene                                                              | 1.43                 | 1.27                 |
| 93085_at                   | Psmb9         | proteasome (prosome, macropain) subunit, beta type 9 (large multifunctional protease 2) | 1.21                 | 1.27                 |
| 96648_at                   | Coro1a        | coronin, actin binding protein 1A                                                       | 1.34                 | 1.28                 |
| 100998_at                  | H2-Ab1        | histocompatibility 2, class II antigen A, beta 1                                        | 1.27                 | 1.36                 |
| 92694_at                   | Chi3l3        | chitinase 3-like 3                                                                      | 6.11                 | 5.20                 |
| 92633_at                   | Ctsz          | cathepsin Z                                                                             | 1.45                 | 1.47                 |
| 103507_at                  | Emr1          | EGF-like module containing, mucin-like, hormone receptor-like sequence 1                | 1.30                 | 1.22                 |
| 160406_at                  | Ctsk          | cathepsin K                                                                             | 1.22                 | 1.38                 |
| 102326_at                  | Ncf2          | neutrophil cytosolic factor 2                                                           | 1.21                 | 1.46                 |
| 98025_at                   | Evi2          | ecotropic viral integration site 2                                                      | 1.66                 | 1.43                 |
| 104606_at                  | Cd52          | CD52 antigen                                                                            | 1.94                 | 1.73                 |
| 98026_g_at                 | Evi2          | ecotropic viral integration site 2                                                      | 1.31                 | 1.23                 |
| 97468_at                   | Cks1          | CDC28 protein kinase 1                                                                  | 1.25                 | 1.21                 |
| 94258_at                   | Arhgdib       | Rho, GDP dissociation inhibitor (GDI) beta                                              | 1.25                 | 1.30                 |
| 98092_at                   | Plac8         | placenta-specific 8                                                                     | 1.41                 | 1.38                 |
| 100581_at                  | Cstb          | cystatin B                                                                              | 1.27                 | 1.28                 |
| 94278_at                   | Lcp1          | lymphocyte cytosolic protein 1                                                          | 1.25                 | 1.35                 |
| 102791_at                  | Psmb8         | proteasome (prosome, macropain) subunit, beta type 8 (large multifunctional protease 7) | 1.29                 | 1.32                 |
| 93008_at                   | Lsm4          | LSM4 homolog, U6 small nuclear RNA associated (S. cerevisiae)                           | 1.22                 | 1.27                 |
| 103690_at                  | Wbscr5        | Williams-Beuren syndrome chromosome region 5 homolog                                    | 1.38                 | 1.32                 |

| Affymetrix<br>Probe Set ID | Gene Symbol | Title                                                                                       | Ratio OVA vs<br>OVAc | Ratio TMA vs<br>TMAc |
|----------------------------|-------------|---------------------------------------------------------------------------------------------|----------------------|----------------------|
|                            |             | (human)                                                                                     |                      |                      |
| 92471_i_at                 | Slfn2       | schlafen 2                                                                                  | 1.34                 | 1.36                 |
| 93908_f_at                 | ---         | ---                                                                                         | 1.35                 | 1.51                 |
| 103089_at                  | Cd48        | CD48 antigen                                                                                | 1.50                 | 1.42                 |
| 92762_at                   | Clecsf6     | C-type (calcium dependent, carbohydrate recognition<br>domain) lectin, superfamily member 6 | 1.21                 | 1.32                 |
| 102904_at                  | H2-Ea       | histocompatibility 2, class II antigen E alpha                                              | 1.31                 | 1.45                 |
| 94939_at                   | Cd53        | CD53 antigen                                                                                | 1.56                 | 1.56                 |
| 98034_at                   | H2-DMb1     | histocompatibility 2, class II, locus Mb1                                                   | 1.32                 | 1.46                 |
| 94805_f_at                 | ---         | ---                                                                                         | 1.58                 | 1.68                 |
| 162198_f_at                | ---         | ---                                                                                         | 1.33                 | 1.69                 |
| 97527_at                   | Cks2        | CDC28 protein kinase regulatory subunit 2                                                   | 1.34                 | 1.53                 |
| 93092_at                   | H2-DMa      | histocompatibility 2, class II, locus DMa                                                   | 1.27                 | 1.33                 |
| 103662_at                  | Ncf4        | neutrophil cytosolic factor 4                                                               | 1.35                 | 1.32                 |
| 100128_at                  | Cdc2a       | cell division cycle 2 homolog A (S. pombe)                                                  | 1.33                 | 1.32                 |
| 93909_f_at                 | ---         | ---                                                                                         | 1.41                 | 1.41                 |
| 99413_at                   | Ccr1        | chemokine (C-C motif) receptor 1                                                            | 1.43                 | 1.28                 |
| 94840_at                   | Hexa        | hexosaminidase A                                                                            | 1.22                 | 1.39                 |
| 93869_s_at                 | ---         | ---                                                                                         | 1.42                 | 1.76                 |
| 102914_s_at                | ---         | ---                                                                                         | 1.47                 | 1.77                 |
| 100397_at                  | Tyrobp      | TYRO protein tyrosine kinase binding protein                                                | 1.43                 | 1.72                 |
| 98035_g_at                 | H2-DMb1     | histocompatibility 2, class II, locus Mb1                                                   | 1.28                 | 1.42                 |
| 100059_at                  | Cyba        | cytochrome b-245, alpha polypeptide                                                         | 1.28                 | 1.42                 |
| 102330_at                  | Aif1        | allograft inflammatory factor 1                                                             | 1.20                 | 1.29                 |
| 92472_f_at                 | Slfn2       | schlafen 2                                                                                  | 1.32                 | 1.45                 |
| 92387_at                   | Tbxas1      | thromboxane A synthase 1, platelet                                                          | 1.24                 | 1.29                 |
| 92217_s_at                 | ---         | ---                                                                                         | 1.38                 | 1.47                 |
| 160106_at                  | Capg        | capping protein (actin filament), gelsolin-like                                             | 1.43                 | 1.36                 |
| 98473_at                   | Arg2        | arginase type II                                                                            | 1.28                 | 1.23                 |
| 97945_at                   | ---         | ---                                                                                         | 1.31                 | 1.37                 |
| 100311_f_at                | Ear1        | eosinophil-associated ribonuclease 1                                                        | 1.76                 | 1.91                 |

| Affymetrix<br>Probe Set ID | Gene Symbol   | Title                                                    | Ratio OVA vs<br>OVAc | Ratio TMA vs<br>TMAc |
|----------------------------|---------------|----------------------------------------------------------|----------------------|----------------------|
| 92356_at                   | Ptpn8         | protein tyrosine phosphatase, non-receptor type 8        | 1.22                 | 1.25                 |
| 103016_s_at                | Cd68          | CD68 antigen                                             | 1.89                 | 1.77                 |
| 98398_s_at                 | Apobec1       | apolipoprotein B editing complex 1                       | 1.21                 | 1.25                 |
| 102001_at                  | Rrm2          | ribonucleotide reductase M2                              | 1.33                 | 1.35                 |
| 103240_f_at                | Rnase2        | ribonuclease, RNase A family, 2                          | 2.00                 | 1.95                 |
| 101521_at                  | Birc5         | baculoviral IAP repeat-containing 5                      | 1.45                 | 1.45                 |
| 99578_at                   | Top2a         | topoisomerase (DNA) II alpha                             | 1.24                 | 1.31                 |
| 95373_at                   | Cd2           | CD2 antigen                                              | 1.26                 | 1.35                 |
| 93105_s_at                 | Tcrb-V13      | T-cell receptor beta, variable 13                        | 1.29                 | 1.33                 |
| 96041_at                   | Rbm3          | RNA binding motif protein 3                              | 1.22                 | 1.51                 |
| 101024_i_at                | Sprr2a        | small proline-rich protein 2A                            | 13.00                | 0.80                 |
| 99926_at                   | ---           | ---                                                      | 1.81                 | 0.74                 |
| 97197_r_at                 | Fv4           | ---                                                      | 1.26                 | 0.83                 |
| 103581_at                  | Cte1          | cytosolic acyl-CoA thioesterase 1                        | 0.80                 | 1.26                 |
| 96895_at                   | Pon1          | paraoxonase 1                                            | 0.52                 | 0.66                 |
| 99548_at                   | Aldh3a1       | aldehyde dehydrogenase family 3, subfamily A1            | 0.70                 | 0.67                 |
| 104421_at                  | Fmo3          | flavin containing monooxygenase 3                        | 0.36                 | 0.58                 |
| 100069_at                  | Cyp2f2        | cytochrome P450, family 2, subfamily f, polypeptide 2    | 0.78                 | 0.73                 |
| 92365_at                   | Figf          | c-fos induced growth factor                              | 0.83                 | 0.64                 |
| 102916_s_at                | Tnxb          | tenascin XB                                              | 0.64                 | 0.67                 |
| 102953_at                  | Msln          | mesothelin                                               | 0.75                 | 0.76                 |
| 98507_at                   | Nr1d1         | nuclear receptor subfamily 1, group D, member 1          | 0.76                 | 0.65                 |
| 93481_at                   | 2400004E04Rik | RIKEN cDNA 2400004E04 gene                               | 0.81                 | 0.81                 |
| 92808_f_at                 | Fkbp4         | FK506 binding protein 4                                  | 0.79                 | 0.79                 |
| 97347_at                   | Ltbp4         | latent transforming growth factor beta binding protein 4 | 0.69                 | 0.61                 |
| 103715_at                  | Scin          | scinderin                                                | 2.27                 | 1.04                 |
| 99833_at                   | Capn9         | calpain 9 (nCL-4)                                        | 1.79                 | 1.11                 |
| 93915_at                   | Pou2af1       | POU domain, class 2, associating factor 1                | 1.90                 | 1.19                 |
| 102736_at                  | Ccl2          | chemokine (C-C motif) ligand 2                           | 2.21                 | 1.02                 |
| 102755_at                  | Itln          | intelectin                                               | 3.07                 | 1.02                 |
| 92737_at                   | Irf4          | interferon regulatory factor 4                           | 1.38                 | 1.08                 |

| Affymetrix<br>Probe Set ID | Gene Symbol   | Title                                                                   | Ratio OVA vs<br>OVAc | Ratio TMA vs<br>TMAc |
|----------------------------|---------------|-------------------------------------------------------------------------|----------------------|----------------------|
| 94761_at                   | Ccl7          | chemokine (C-C motif) ligand 7                                          | 1.67                 | 1.05                 |
| 94357_at                   | Slc5a1        | solute carrier family 5 (sodium/glucose cotransporter),<br>member 1     | 1.44                 | 1.01                 |
| 96605_at                   | 0610011I04Rik | RIKEN cDNA 0610011I04 gene                                              | 1.35                 | 1.07                 |
| 97826_at                   | A430096B05Rik | RIKEN cDNA A430096B05 gene                                              | 2.60                 | 1.11                 |
| 94778_at                   | Aldh1a7       | aldehyde dehydrogenase family 1, subfamily A7                           | 1.36                 | 1.10                 |
| 101979_at                  | Gadd45g       | growth arrest and DNA-damage-inducible 45 gamma                         | 1.59                 | 1.14                 |
| 92198_s_at                 | Daf2          | decay accelerating factor 2                                             | 1.35                 | 1.02                 |
| 104374_at                  | Serpina3n     | serine (or cysteine) proteinase inhibitor, clade A, member 3N           | 2.18                 | 1.05                 |
| 97564_f_at                 | ---           | ---                                                                     | 2.33                 | 1.11                 |
| 97783_at                   | Ccl17         | chemokine (C-C motif) ligand 17                                         | 1.30                 | 1.09                 |
| 101656_f_at                | Igk-V5        | immunoglobulin kappa chain variable 5 (V5 family)                       | 2.37                 | 1.17                 |
| 101075_f_at                | Agr2          | anterior gradient 2 ( <i>Xenopus laevis</i> )                           | 3.83                 | 1.09                 |
| 95599_at                   | Siat4c        | sialyltransferase 4C (beta-galactoside alpha-2,3-<br>sialyltransferase) | 1.32                 | 1.06                 |
| 100322_at                  | Igh-4         | immunoglobulin heavy chain 4 (serum IgG1)                               | 1.83                 | 1.15                 |
| 95364_at                   | Gna14         | guanine nucleotide binding protein, alpha 14                            | 1.51                 | 1.08                 |
| 93185_at                   | ---           | Mus musculus transcribed sequences                                      | 1.33                 | 1.12                 |
| 93586_at                   | Syngn2        | synaptogyrin 2                                                          | 1.24                 | 1.03                 |
| 161012_at                  | Cd79b         | CD79B antigen                                                           | 1.41                 | 1.15                 |
| 93755_at                   | Retnlb        | resistin like beta                                                      | 3.21                 | 1.08                 |
| 104172_at                  | Folr2         | folate receptor 2 (fetal)                                               | 1.55                 | 1.04                 |
| 97964_at                   | Fkbp11        | FK506 binding protein 11                                                | 1.33                 | 1.07                 |
| 93097_at                   | Arg1          | arginase 1, liver                                                       | 4.27                 | 1.15                 |
| 98980_at                   | Cd37          | CD37 antigen                                                            | 1.31                 | 1.08                 |
| 101751_f_at                | ---           | ---                                                                     | 1.66                 | 1.14                 |
| 100299_f_at                | Igk-V8        | immunoglobulin kappa chain variable 8 (V8)                              | 2.05                 | 1.07                 |
| 100682_f_at                | Igk-V8        | immunoglobulin kappa chain variable 8 (V8)                              | 2.25                 | 1.16                 |
| 101826_at                  | ---           | ---                                                                     | 2.81                 | 1.16                 |
| 100771_at                  | Blk           | B-cell linker                                                           | 1.30                 | 1.13                 |
| 104014_at                  | Hfe           | hemochromatosis                                                         | 1.34                 | 1.13                 |

| Affymetrix<br>Probe Set ID | Gene Symbol   | Title                                                                       | Ratio OVA vs<br>OVAc | Ratio TMA vs<br>TMAc |
|----------------------------|---------------|-----------------------------------------------------------------------------|----------------------|----------------------|
| 104688_at                  | Map4k1        | mitogen activated protein kinase kinase kinase 1                            | 1.28                 | 1.13                 |
| 93503_at                   | Sfrp2         | secreted frizzled-related sequence protein 2                                | 1.35                 | 1.12                 |
| 160789_at                  | 9530090G24Rik | RIKEN cDNA 9530090G24 gene                                                  | 1.22                 | 1.02                 |
| 95893_at                   | Blk           | B lymphoid kinase                                                           | 1.29                 | 1.11                 |
| 101468_at                  | Pfc           | properdin factor, complement                                                | 1.52                 | 1.13                 |
| 104065_at                  | Edem1         | ER degradation enhancer, mannosidase alpha-like 1                           | 1.44                 | 1.09                 |
| 101464_at                  | Timpl         | tissue inhibitor of metalloproteinase 1                                     | 1.52                 | 1.10                 |
| 95546_g_at                 | Igf1          | insulin-like growth factor 1                                                | 1.71                 | 1.06                 |
| 92780_f_at                 | ---           | ---                                                                         | 1.43                 | 1.12                 |
| 99546_at                   | Fkbp2         | FK506 binding protein 2                                                     | 1.25                 | 1.13                 |
| 102025_at                  | Cxcl13        | chemokine (C-X-C motif) ligand 13                                           | 1.78                 | 1.20                 |
| 93717_at                   | Ccl12         | chemokine (C-C motif) ligand 12                                             | 1.47                 | 1.14                 |
| 104147_at                  | Nans          | N-acetylneuraminic acid synthase (sialic acid synthase)                     | 1.32                 | 1.08                 |
| 92559_at                   | Vcam1         | vascular cell adhesion molecule 1                                           | 1.39                 | 1.09                 |
| 99505_at                   | Rab4b         | RAB4B, member RAS oncogene family                                           | 1.20                 | 1.05                 |
| 101436_at                  | Cxcl9         | chemokine (C-X-C motif) ligand 9                                            | 1.31                 | 1.12                 |
| 94383_at                   | Tfpi2         | tissue factor pathway inhibitor 2                                           | 1.26                 | 1.08                 |
| 92636_f_at                 | Sec61g        | SEC61, gamma subunit                                                        | 1.29                 | 1.16                 |
| 96515_at                   | Il4i1         | interleukin 4 induced 1                                                     | 1.43                 | 1.12                 |
| 98440_at                   | Ltb4dh        | leukotriene B4 12-hydroxydehydrogenase                                      | 1.24                 | 1.13                 |
| 104712_at                  | Myc           | myelocytomatosis oncogene                                                   | 1.21                 | 1.05                 |
| 102892_at                  | Kcnab2        | potassium voltage-gated channel, shaker-related subfamily,<br>beta member 2 | 1.26                 | 1.11                 |
| 96295_at                   | Psat1         | phosphoserine aminotransferase 1                                            | 1.37                 | 1.17                 |
| 94831_at                   | Ctsb          | cathepsin B                                                                 | 1.36                 | 1.13                 |
| 104696_at                  | Ctse          | cathepsin E                                                                 | 1.33                 | 1.13                 |
| 161689_f_at                | Il1r2         | interleukin 1 receptor, type II                                             | 1.21                 | 1.07                 |
| 160569_at                  | 2310008M10Rik | RIKEN cDNA 2310008M10 gene                                                  | 1.25                 | 1.16                 |
| 92668_at                   | Btk           | Bruton agammaglobulinemia tyrosine kinase                                   | 1.25                 | 1.16                 |
| 103579_at                  | Rac2          | RAS-related C3 botulinum substrate 2                                        | 1.32                 | 1.13                 |
| 160580_at                  | Man1a         | mannosidase 1, alpha                                                        | 1.29                 | 1.12                 |



| Affymetrix<br>Probe Set ID | Gene Symbol   | Title                                                         | Ratio OVA vs<br>OVAc | Ratio TMA vs<br>TMAc |
|----------------------------|---------------|---------------------------------------------------------------|----------------------|----------------------|
| 97538_at                   | Gus           | beta-glucuronidase                                            | 1.32                 | 1.13                 |
| 102354_at                  | Tcf19         | transcription factor 19                                       | 1.23                 | 1.12                 |
| 95722_at                   | Glx1          | glutaredoxin 1 (thioltransferase)                             | 1.28                 | 1.16                 |
| 103362_at                  | Ptger4        | prostaglandin E receptor 4 (subtype EP4)                      | 1.23                 | 1.18                 |
| 93993_at                   | Lman2         | lectin, mannose-binding 2                                     | 1.29                 | 1.13                 |
| 92560_g_at                 | Vcam1         | vascular cell adhesion molecule 1                             | 1.37                 | 1.20                 |
| 94789_r_at                 | Tubb5         | tubulin, beta 5                                               | 1.20                 | 1.15                 |
| 97819_at                   | Gsto1         | glutathione S-transferase omega 1                             | 1.86                 | 0.92                 |
| 101025_f_at                | Sprp2a        | small proline-rich protein 2A                                 | 2.40                 | 0.91                 |
| 92832_at                   | Socs1         | suppressor of cytokine signaling 1                            | 1.37                 | 0.95                 |
| 96603_at                   | Qscn6         | quiescin Q6                                                   | 1.36                 | 0.94                 |
| 99810_at                   | Gpx2          | glutathione peroxidase 2                                      | 1.29                 | 0.89                 |
| 102778_at                  | Cd79a         | CD79A antigen (immunoglobulin-associated alpha)               | 1.34                 | 0.94                 |
| 96970_at                   | Igh-VJ558     | immunoglobulin heavy chain (J558 family)                      | 1.24                 | 0.97                 |
| 102707_f_at                | Serpina3c     | serine (or cysteine) proteinase inhibitor, clade A, member 3C | 1.53                 | 0.98                 |
| 98944_at                   | Sec23b        | SEC23B ( <i>S. cerevisiae</i> )                               | 1.23                 | 1.00                 |
| 99701_f_at                 | Sprp2b        | small proline-rich protein 2B                                 | 2.50                 | 0.91                 |
| 94486_at                   | AA959742      | expressed sequence AA959742                                   | 1.27                 | 0.89                 |
| 100600_at                  | Cd24a         | CD24a antigen                                                 | 1.23                 | 1.00                 |
| 93861_f_at                 | ---           | ---                                                           | 1.30                 | 0.84                 |
| 160646_at                  | Gsr           | glutathione reductase 1                                       | 1.28                 | 0.97                 |
| 96602_g_at                 | Qscn6         | quiescin Q6                                                   | 1.46                 | 0.88                 |
| 92742_at                   | Ccl11         | small chemokine (C-C motif) ligand 11                         | 1.91                 | 0.93                 |
| 98331_at                   | Col3a1        | procollagen, type III, alpha 1                                | 1.34                 | 0.86                 |
| 102269_at                  | Alox12e       | arachidonate lipoxygenase, epidermal                          | 1.24                 | 0.95                 |
| 99571_at                   | MGC29978      | 3-ketoacyl-CoA thiolase B                                     | 0.82                 | 1.08                 |
| 93456_r_at                 | ---           | ---                                                           | 0.65                 | 1.04                 |
| 101900_at                  | Cdkn2b        | cyclin-dependent kinase inhibitor 2B (p15, inhibits CDK4)     | 0.74                 | 1.01                 |
| 104729_at                  | Gja4          | gap junction membrane channel protein alpha 4                 | 0.81                 | 1.06                 |
| 97835_at                   | 0610007L05Rik | RIKEN cDNA 0610007L05 gene                                    | 0.72                 | 1.18                 |
| 104512_at                  | Upk3b         | uroplakin 3B                                                  | 0.69                 | 1.15                 |

| Affymetrix<br>Probe Set ID | Gene Symbol   | Title                                                                                      | Ratio OVA vs<br>OVAc | Ratio TMA vs<br>TMAc |
|----------------------------|---------------|--------------------------------------------------------------------------------------------|----------------------|----------------------|
| 100112_at                  | Cxcl12        | chemokine (C-X-C motif) ligand 12                                                          | 0.79                 | 1.09                 |
| 97383_at                   | Slc6a6        | solute carrier family 6 (neurotransmitter transporter, taurine), member 6                  | 0.81                 | 1.05                 |
| 97920_at                   | Krt2-7        | keratin complex 2, basic, gene 7                                                           | 0.83                 | 1.11                 |
| 101539_f_at                | Ces3          | carboxylesterase 3                                                                         | 0.81                 | 1.02                 |
| 103457_at                  | Rev3l         | REV3-like, catalytic subunit of DNA polymerase zeta<br>RAD54 like ( <i>S. cerevisiae</i> ) | 0.82                 | 1.09                 |
| 102431_at                  | Mapt          | microtubule-associated protein tau                                                         | 0.73                 | 1.08                 |
| 103904_at                  | Igfbp6        | insulin-like growth factor binding protein 6                                               | 0.81                 | 1.03                 |
| 160479_at                  | Cat           | catalase                                                                                   | 0.69                 | 0.88                 |
| 100596_at                  | Selenbp1      | selenium binding protein 1                                                                 | 0.70                 | 0.85                 |
| 161294_f_at                | Clu           | clusterin                                                                                  | 0.81                 | 0.99                 |
| 101538_i_at                | Ces3          | carboxylesterase 3                                                                         | 0.72                 | 0.93                 |
| 93543_f_at                 | Gstm1         | glutathione S-transferase, mu 1                                                            | 0.83                 | 0.87                 |
| 92971_at                   | 2210012L08Rik | RIKEN cDNA 2210012L08 gene                                                                 | 0.82                 | 0.89                 |
| 93467_at                   | B430218L07Rik | RIKEN cDNA B430218L07 gene                                                                 | 0.82                 | 0.98                 |
| 94467_at                   | Cebpa-rs1     | CCAAT/enhancer binding protein alpha (C/EBP), related sequence 1                           | 0.83                 | 0.98                 |
| 162044_f_at                | Cyp4b1        | cytochrome P450, family 4, subfamily b, polypeptide 1                                      | 0.83                 | 0.90                 |
| 103353_f_at                | Cyp4b1        | cytochrome P450, family 4, subfamily b, polypeptide 1                                      | 0.82                 | 0.89                 |
| 93015_at                   | Gsta3         | glutathione S-transferase, alpha 3                                                         | 0.79                 | 0.86                 |
| 100566_at                  | Igfbp5        | insulin-like growth factor binding protein 5                                               | 0.78                 | 0.95                 |
| 102701_at                  | Cyp2b10       | cytochrome P450, family 2, subfamily b, polypeptide 10                                     | 0.79                 | 0.88                 |
| 104550_at                  | Cyp2s1        | cytochrome P450, family 2, subfamily s, polypeptide 1                                      | 0.82                 | 0.91                 |
| 160255_at                  | 1110004P15Rik | RIKEN cDNA 1110004P15 gene                                                                 | 0.79                 | 0.97                 |
| 97374_at                   | 2810025M15Rik | RIKEN cDNA 2810025M15 gene                                                                 | 1.04                 | 1.27                 |
| 103341_at                  | Ctps          | cytidine 5'-triphosphate synthase                                                          | 1.15                 | 1.20                 |
| 99387_at                   | Fpr1          | formyl peptide receptor 1                                                                  | 1.02                 | 1.41                 |
| 94085_at                   | Prg           | proteoglycan, secretory granule                                                            | 1.20                 | 1.28                 |
| 93219_at                   | Acp1          | acid phosphatase 1, soluble                                                                | 1.08                 | 1.25                 |
| 95590_at                   | Alg5          | asparagine-linked glycosylation 5 homolog (yeast, dolichyl-                                | 1.06                 | 1.24                 |

| Affymetrix<br>Probe Set ID | Gene Symbol   | Title                                                                                     | Ratio OVA vs<br>OVAc | Ratio TMA vs<br>TMAc |
|----------------------------|---------------|-------------------------------------------------------------------------------------------|----------------------|----------------------|
| 97411_at                   | Ect2          | phosphate beta-glucosyltransferase)<br>ect2 oncogene                                      | 1.08                 | 1.38                 |
| 96016_at                   | ---           | Mus musculus cDNA clone MGC:67366 IMAGE:5683334,<br>complete cds                          | 1.10                 | 1.35                 |
| 97229_at                   | 5730427N09Rik | RIKEN cDNA 5730427N09 gene                                                                | 1.07                 | 1.30                 |
| 101102_at                  | C1            | immunoglobulin (CD79A) binding protein 1                                                  | 1.02                 | 1.23                 |
| 94933_at                   | BC008155      | cDNA sequence BC008155                                                                    | 1.03                 | 1.21                 |
| 100893_at                  | Sptlc2        | serine palmitoyltransferase, long chain base subunit 2                                    | 1.07                 | 1.21                 |
| 96319_at                   | Cdc20         | cell division cycle 20 homolog (S. cerevisiae)                                            | 1.15                 | 1.33                 |
| 103080_at                  | Samhd1        | SAM domain and HD domain, 1                                                               | 1.15                 | 1.24                 |
| 94294_at                   | Ccnb2         | cyclin B2                                                                                 | 1.14                 | 1.28                 |
| 101984_at                  | Atox1         | ATX1 (antioxidant protein 1) homolog 1 (yeast)                                            | 1.08                 | 1.21                 |
| 160129_at                  | Eef1d         | eukaryotic translation elongation factor 1 delta (guanine<br>nucleotide exchange protein) | 1.04                 | 1.26                 |
| 104097_at                  | Bub1          | budding uninhibited by benzimidazoles 1 homolog (S.<br>cerevisiae)                        | 1.07                 | 1.25                 |
| 96962_at                   | Rpl6          | ribosomal protein L6                                                                      | 1.04                 | 1.23                 |
| 93988_at                   | Psma7         | proteasome (prosome, macropain) subunit, alpha type 7                                     | 1.03                 | 1.35                 |
| 96154_at                   | Renbp         | renin binding protein                                                                     | 1.09                 | 1.28                 |
| 95613_at                   | 2010200I23Rik | RIKEN cDNA 2010200I23 gene                                                                | 1.04                 | 1.26                 |
| 95753_at                   | A730011O11Rik | RIKEN cDNA A730011O11 gene                                                                | 1.11                 | 1.21                 |
| 97200_f_at                 | Snrpe         | small nuclear ribonucleoprotein E                                                         | 1.14                 | 1.26                 |
| 98436_s_at                 | Casp3         | caspase 3, apoptosis related cysteine protease                                            | 1.15                 | 1.22                 |
| 93822_at                   | Rpl37a        | ribosomal protein L37a                                                                    | 1.08                 | 1.26                 |
| 96358_at                   | Rps23         | ribosomal protein S23                                                                     | 1.03                 | 1.20                 |
| 160383_at                  | Cox7a2l       | cytochrome c oxidase subunit VIIa polypeptide 2-like                                      | 1.04                 | 1.30                 |
| 99158_at                   | Sh3d3         | SH3 domain protein 3                                                                      | 1.05                 | 1.28                 |
| 97647_at                   | Rps16         | ribosomal protein S16                                                                     | 1.07                 | 1.32                 |
| 95586_at                   | P2rx4         | purinergic receptor P2X, ligand-gated ion channel 4                                       | 1.08                 | 1.22                 |
| 93865_s_at                 | H2-T10        | histocompatibility 2, T region locus 10                                                   | 1.00                 | 1.27                 |
| 95796_g_at                 | ---           | ---                                                                                       | 1.10                 | 1.28                 |

| Affymetrix<br>Probe Set ID | Gene Symbol   | Title                                                                          | Ratio OVA vs<br>OVAc | Ratio TMA vs<br>TMAc |
|----------------------------|---------------|--------------------------------------------------------------------------------|----------------------|----------------------|
| 99149_at                   | 2310035M22Rik | RIKEN cDNA 2310035M22 gene                                                     | 1.15                 | 1.26                 |
| 93984_at                   | Atpi          | ATPase inhibitor                                                               | 1.02                 | 1.39                 |
| 102195_at                  | Map4k4        | mitogen-activated protein kinase kinase kinase 4                               | 1.00                 | 1.31                 |
| 160402_at                  | Tceb2         | transcription elongation factor B (SIII), polypeptide 2 (18<br>kDa, elongin B) | 1.05                 | 1.22                 |
| 101634_at                  | Npm1          | nucleophosmin 1                                                                | 1.19                 | 1.25                 |
| 102197_at                  | Nucb2         | nucleobindin 2                                                                 | 1.13                 | 1.21                 |
| 98626_at                   | 1810017G16Rik | RIKEN cDNA 1810017G16 gene                                                     | 1.06                 | 1.27                 |
| 101212_at                  | ---           | ---                                                                            | 1.13                 | 1.29                 |
| 97013_f_at                 | Cyba          | cytochrome b-245, alpha polypeptide                                            | 1.06                 | 1.36                 |
| 92598_at                   | Atp6v1b2      | ATPase, H <sup>+</sup> transporting, V1 subunit B, isoform 2                   | 1.02                 | 1.25                 |
| 100579_s_at                | Clta          | clathrin, light polypeptide (Lca)                                              | 1.13                 | 1.26                 |
| 160192_at                  | Rbmxrt        | RNA binding motif protein, X chromosome retrogene                              | 1.16                 | 1.28                 |
| 92834_at                   | Rpl13a        | ribosomal protein L13a                                                         | 1.16                 | 1.27                 |
| 96278_at                   | 1110020C13Rik | RIKEN cDNA 1110020C13 gene                                                     | 1.15                 | 1.22                 |
| 101398_at                  | Stxbp2        | syntaxin binding protein 2                                                     | 1.05                 | 1.22                 |
| 160344_at                  | Npc2          | Niemann Pick type C2                                                           | 1.09                 | 1.31                 |
| 160476_f_at                | Rpl18         | ribosomal protein L18                                                          | 1.05                 | 1.24                 |
| 160395_at                  | D11Ert603e    | DNA segment, Chr 11, ERATO Doi 603, expressed                                  | 1.05                 | 1.31                 |
| 97907_at                   | Lsm7          | LSM7 homolog, U6 small nuclear RNA associated ( <i>S.<br/>cerevisiae</i> )     | 1.06                 | 1.25                 |
| 103074_f_at                | Taf9          | TAF9 RNA polymerase II, TATA box binding protein<br>(TBP)-associated factor    | 1.06                 | 1.59                 |
| 93999_at                   | Snrpg         | small nuclear ribonucleoprotein polypeptide G                                  | 1.08                 | 1.27                 |
| 93019_at                   | H2afx         | H2A histone family, member X                                                   | 1.12                 | 1.30                 |
| 101084_f_at                | Dpm3          | dolichyl-phosphate mannosyltransferase polypeptide 3                           | 1.07                 | 1.25                 |
| 93250_r_at                 | Hmgb2         | high mobility group box 2                                                      | 1.13                 | 1.33                 |
| 92665_f_at                 | Xlr           | X-linked lymphocyte-regulated complex                                          | 1.12                 | 1.38                 |
| 160177_at                  | 2610203K23Rik | RIKEN cDNA 2610203K23 gene                                                     | 1.07                 | 1.20                 |
| 93835_at                   | Fuca          | fucosidase, alpha-L- 1, tissue                                                 | 1.12                 | 1.28                 |
| 100588_at                  | Psme2         | proteasome (prosome, macropain) 28 subunit, beta                               | 1.09                 | 1.22                 |

| Affymetrix<br>Probe Set ID | Gene Symbol   | Title                                                            | Ratio OVA vs<br>OVAc | Ratio TMA vs<br>TMAc |
|----------------------------|---------------|------------------------------------------------------------------|----------------------|----------------------|
| 102012_at                  | Scap2         | src family associated phosphoprotein 2                           | 1.12                 | 1.25                 |
| 98938_at                   | 1500026D16Rik | RIKEN cDNA 1500026D16 gene                                       | 1.07                 | 1.26                 |
| 93067_f_at                 | Hist2h2aa1    | histone 2, H2aa1                                                 | 1.08                 | 1.24                 |
| 104603_at                  | Gstt2         | glutathione S-transferase, theta 2                               | 1.15                 | 1.21                 |
| 103299_at                  | AI132321      | expressed sequence AI132321                                      | 1.16                 | 1.26                 |
| 98993_at                   | Ppp2r5c       | protein phosphatase 2, regulatory subunit B (B56), gamma isoform | 1.12                 | 1.21                 |
| 101793_at                  | Fcgr1         | Fc receptor, IgG, high affinity I                                | 1.15                 | 1.21                 |
| 101065_at                  | Pcna          | proliferating cell nuclear antigen                               | 1.15                 | 1.22                 |
| 101589_at                  | Hmgn2         | high mobility group nucleosomal binding domain 2                 | 1.12                 | 1.24                 |
| 104099_at                  | Pglyrp        | peptidoglycan recognition protein                                | 1.03                 | 0.51                 |
| 94370_at                   | Oit1          | oncoprotein induced transcript 1                                 | 1.03                 | 0.75                 |
| 100068_at                  | Aldh1a1       | aldehyde dehydrogenase family 1, subfamily A1                    | 1.01                 | 0.82                 |
| 102839_at                  | Plscr1        | phospholipid scramblase 1                                        | 1.00                 | 0.79                 |
| 103006_at                  | Atf5          | activating transcription factor 5                                | 1.00                 | 0.69                 |
| 100443_at                  | Bcat2         | branched chain aminotransferase 2, mitochondrial                 | 1.03                 | 0.68                 |
| 92280_at                   | Actn1         | actinin, alpha 1                                                 | 1.04                 | 0.77                 |
| 99993_at                   | Anpep         | alanyl (membrane) aminopeptidase                                 | 1.06                 | 0.74                 |
| 94902_at                   | Sod3          | superoxide dismutase 3, extracellular                            | 1.03                 | 0.76                 |
| 100074_at                  | 2400003B06Rik | RIKEN cDNA 2400003B06 gene                                       | 1.05                 | 0.75                 |
| 92473_at                   | Mknk2         | MAP kinase-interacting serine/threonine kinase 2                 | 1.05                 | 0.79                 |
| 160378_at                  | 1110006I15Rik | RIKEN cDNA 1110006I15 gene                                       | 1.01                 | 0.74                 |
| 92901_at                   | Rara          | retinoic acid receptor, alpha                                    | 1.12                 | 0.81                 |
| 99160_s_at                 | 1110025J15Rik | RIKEN cDNA 1110025J15 gene                                       | 1.10                 | 0.77                 |
| 103806_at                  | Lrp5          | low density lipoprotein receptor-related protein 5               | 1.01                 | 0.75                 |
| 102698_at                  | Epas1         | endothelial PAS domain protein 1                                 | 1.04                 | 0.57                 |
| 100307_at                  | Nfix          | nuclear factor I/X                                               | 1.01                 | 0.66                 |
| 102306_at                  | Hs2st1        | heparan sulfate 2-O-sulfotransferase 1                           | 1.00                 | 1.21                 |
| 97379_at                   | Fbp2          | fructose biphosphatase 2                                         | 0.93                 | 1.21                 |
| 92265_f_at                 | Ssa2          | Sjogren syndrome antigen A2                                      | 0.91                 | 1.23                 |
| 99187_f_at                 | 2010315L10Rik | RIKEN cDNA 2010315L10 gene                                       | 0.90                 | 1.20                 |

| Affymetrix<br>Probe Set ID | Gene Symbol   | Title                                                                                                                                     | Ratio OVA vs<br>OVAc | Ratio TMA vs<br>TMAc |
|----------------------------|---------------|-------------------------------------------------------------------------------------------------------------------------------------------|----------------------|----------------------|
| 100533_s_at                | Crem          | cAMP responsive element modulator                                                                                                         | 1.00                 | 1.28                 |
| 97917_at                   | Gcn5l1        | general control of amino acid synthesis-like 1 (yeast)                                                                                    | 0.98                 | 1.22                 |
| 93749_at                   | Maoa          | monoamine oxidase A                                                                                                                       | 0.98                 | 1.26                 |
| 99188_at                   | 2010315L10Rik | RIKEN cDNA 2010315L10 gene                                                                                                                | 1.00                 | 1.27                 |
| 93894_f_at                 | Klra3         | killer cell lectin-like receptor, subfamily A, member 3                                                                                   | 0.98                 | 1.23                 |
| 93560_at                   | Acyp1         | acylphosphatase 1, erythrocyte (common) type                                                                                              | 0.97                 | 1.20                 |
| 160482_at                  | Acaa1         | acetyl-Coenzyme A acyltransferase 1                                                                                                       | 0.91                 | 1.21                 |
| 93057_at                   | Btf3          | basic transcription factor 3                                                                                                              | 0.99                 | 1.23                 |
| 93305_f_at                 | Vamp8         | vesicle-associated membrane protein 8                                                                                                     | 0.93                 | 1.21                 |
| 102318_at                  | Siat8d        | sialyltransferase 8 (alpha-2, 8-sialyltransferase) D                                                                                      | 0.97                 | 1.27                 |
| 160578_at                  | ---           | Mus musculus adult male hypothalamus cDNA, RIKEN full-length enriched library, clone:A230107M19 product:unknown EST, full insert sequence | 0.91                 | 1.21                 |
| 103695_f_at                | C330007P06Rik | RIKEN cDNA C330007P06 gene                                                                                                                | 0.87                 | 1.27                 |
| 97207_f_at                 | Lypla1        | lysophospholipase 1                                                                                                                       | 0.98                 | 1.22                 |
| 92887_at                   | Ddah2         | dimethylarginine dimethylaminohydrolase 2                                                                                                 | 0.91                 | 1.20                 |
| 162475_f_at                | Pglyrp        | peptidoglycan recognition protein                                                                                                         | 0.96                 | 0.38                 |
| 101929_at                  | 6720463E02Rik | RIKEN cDNA 6720463E02 gene                                                                                                                | 0.87                 | 0.61                 |
| 94011_at                   | 3100004P22Rik | RIKEN cDNA 3100004P22 gene                                                                                                                | 0.96                 | 0.81                 |
| 92777_at                   | Cyr61         | cysteine rich protein 61                                                                                                                  | 0.87                 | 0.82                 |
| 101007_at                  | Mknk2         | MAP kinase-interacting serine/threonine kinase 2                                                                                          | 0.93                 | 0.74                 |
| 96346_at                   | Cdo1          | cysteine dioxygenase 1, cytosolic                                                                                                         | 0.86                 | 0.63                 |
| 98516_at                   | ---           | Mus musculus cDNA clone MGC:67360 IMAGE:6823629, complete cds                                                                             | 0.94                 | 0.79                 |
| 96134_at                   | Dp1l1         | deleted in polyposis 1-like 1                                                                                                             | 0.88                 | 0.71                 |
| 102364_at                  | Jund1         | Jun proto-oncogene related gene d1                                                                                                        | 0.93                 | 0.82                 |
| 99444_at                   | Ramp2         | receptor (calcitonin) activity modifying protein 2                                                                                        | 0.92                 | 0.75                 |
| 101072_at                  | BC010348      | cDNA sequence BC010348                                                                                                                    | 0.88                 | 0.72                 |
| 102410_at                  | Hs3st1        | heparan sulfate (glucosamine) 3-O-sulfotransferase 1                                                                                      | 0.91                 | 0.82                 |
| 101856_at                  | 2900008M13Rik | RIKEN cDNA 2900008M13 gene                                                                                                                | 0.95                 | 0.80                 |
| 103888_at                  | Rbpms         | RNA binding protein gene with multiple splicing                                                                                           | 0.92                 | 0.78                 |

| Affymetrix<br>Probe Set ID | Gene Symbol   | Title                                                                      | Ratio OVA vs<br>OVAc | Ratio TMA vs<br>TMAc |
|----------------------------|---------------|----------------------------------------------------------------------------|----------------------|----------------------|
| 93431_at                   | Dm15          | dystrophia myotonica kinase, B15                                           | 0.90                 | 0.62                 |
| 95723_r_at                 | 2610009E16Rik | RIKEN cDNA 2610009E16 gene                                                 | 0.94                 | 0.81                 |
| 102419_at                  | Rarg          | retinoic acid receptor, gamma                                              | 0.86                 | 0.73                 |
| 95083_at                   | Igfbp3        | insulin-like growth factor binding protein 3                               | 0.96                 | 0.82                 |
| 100927_at                  | Pltp          | phospholipid transfer protein                                              | 0.92                 | 0.83                 |
| 102808_at                  | Scn1b         | sodium channel, voltage-gated, type I, beta polypeptide                    | 0.95                 | 0.78                 |
| 98460_at                   | Fto           | fatso                                                                      | 0.93                 | 0.79                 |
| 93264_at                   | Srebf1        | sterol regulatory element binding factor 1                                 | 0.90                 | 0.77                 |
| 99933_at                   | Pvrl2         | poliovirus receptor-related 2                                              | 0.94                 | 0.80                 |
| 94167_at                   | Nos3          | nitric oxide synthase 3, endothelial cell                                  | 0.95                 | 0.83                 |
| 98028_at                   | Twist1        | twist gene homolog 1 (Drosophila)                                          | 0.98                 | 0.82                 |
| 98848_at                   | Sh3d4         | SH3 domain protein 4                                                       | 0.96                 | 0.77                 |
| 97937_at                   | Klf5          | Kruppel-like factor 5                                                      | 0.89                 | 0.81                 |
| 104267_at                  | Slc23a2       | solute carrier family 23 (nucleobase transporters), member 2               | 0.85                 | 0.80                 |
| 102219_at                  | Rfx2          | vregulatory factor X, 2 (influences HLA class II expression)               | 0.92                 | 0.81                 |
| 101307_at                  | ---           | ---                                                                        | 0.90                 | 0.69                 |
| 101676_at                  | Gpx3          | glutathione peroxidase 3                                                   | 0.94                 | 0.73                 |
| 104121_at                  | Jup           | junction plakoglobin                                                       | 0.88                 | 0.71                 |
| 101576_f_at                | Serpina1b     | serine (or cysteine) proteinase inhibitor, clade A, member 1b              | 0.91                 | 0.82                 |
| 93271_s_at                 | Gnas          | GNAS (guanine nucleotide binding protein, alpha stimulating) complex locus | 0.93                 | 0.83                 |
| 92820_at                   | Usp2          | ubiquitin specific protease 2                                              | 0.86                 | 0.79                 |
| 95468_at                   | Egln1         | EGL nine homolog 1 (C. elegans)                                            | 0.87                 | 0.83                 |
| 99169_at                   | Carm1-pending | coactivator-associated arginine methyltransferase 1                        | 0.84                 | 0.81                 |

**Supplementary Table 2. 62 Genes Up-regulated in OVA-, TMA- and *Aspergillus*-induced Asthma.**

| Affymetrix Probe Set ID | Gene                                                                                                      |
|-------------------------|-----------------------------------------------------------------------------------------------------------|
| 92217_s_at              | glycoprotein 49 B/Gp49b                                                                                   |
| 92223_at                | complement component 1, q subcomponent, c polypeptide/C1qc                                                |
| 92459_at                | Ccl8/MCP-2                                                                                                |
| 92471_i_at              | schlafen 2/Shlf2                                                                                          |
| 92633_at                | cathepsin Z preproprotein/Ctsz                                                                            |
| 92694_at                | Chi3l3                                                                                                    |
| 92762_at                | C-type (calcium dependent, carbohydrate recognition domain) lectin, superfamily member 6/Clecsf6          |
| 93302_at                | Tff2/trefoil factor 2 (spasmolytic protein 1)                                                             |
| 93869_s_at              | B-cell leukemia/lymphoma 2 related protein A1d/Bcl2a1d                                                    |
| 94425_at                | lymphocyte antigen 86/Ly86                                                                                |
| 94939_at                | CD53 antigen                                                                                              |
| 95339_r_at              | matrix metalloproteinase 12/Mmp12                                                                         |
| 96020_at                | C1qb  complement component 1, q subcomponent, beta polypeptide                                            |
| 96336_at                | glycine amidinotransferase (L-arginine:glycine amidinotransferase)/Gatm                                   |
| 96972_f_at              | Mouse DNA for Ig-kappa light chain V-J kappa 5 joining region                                             |
| 97327_at                | flap structure specific endonuclease 1/Fen1                                                               |
| 97444_at                | interferon gamma inducible protein 30/Ifi30                                                               |
| 97468_at                | CDC28 protein kinase 1/Cks1                                                                               |
| 97527_at                | RIKEN cDNA 1110038L14/CDC28 protein kinase regulatory subunit 2, mRNA                                     |
| 97566_f_at              | Mus musculus hybridoma BDI-1 immunoglobulin kappa light chain variable region (V kappa) gene, partial cds |
| 98025_at                | ecotropic viral integration site 2/Evi2                                                                   |
| 98034_at                | histocompatibility 2, class II, locus Mb1/H2-DMb1                                                         |
| 98473_at                | arginase type II/Arg2                                                                                     |
| 98562_at                | complement component 1, q subcomponent, alpha polypeptide/C1qa                                            |
| 99405_at                | Igk-V28                                                                                                   |
| 99413_at                | chemokine (C-C motif) receptor 1/Ccr1                                                                     |
| 99578_at                | topoisomerase (DNA) II alpha/Top2a                                                                        |
| 100116_at               | RIKEN cDNA 2810417H13 / homologous fragment from human myeloblast library KIAA0101                        |
| 100156_at               | mini chromosome maintenance deficient 5/Mcm5                                                              |
| 100721_f_at             | recombinant antineuraminidase single chain Ig VH and VL domains                                           |
| 100772_g_at             | Ly-57/B-cell linker                                                                                       |
| 101521_at               | baculoviral IAP repeat-containing 5/Birc5                                                                 |
| 101640_f_at             | Mouse Ig kappa chain 7B6 mRNA, V-region (VJ5) of monoclonal pHox-specific antibody from a hybridoma       |
| 101803_at               | Muc5AC-like gene                                                                                          |
| 101870_at               | Igh-4                                                                                                     |



| Affymetrix<br>Probe Set ID | Gene                                                                          |
|----------------------------|-------------------------------------------------------------------------------|
| 101878_at                  | CD72 antigen                                                                  |
| 102001_at                  | ribonucleotide reductase M2/Rrm2                                              |
| 102076_at                  | Mus musculus IgVk aj4 gene                                                    |
| 102156_f_at                | Mus castaneus IgK chain gene, C-region, 3' end                                |
| 102326_at                  | neutrophil cytosolic factor 2/p67phox                                         |
| 102337_s_at                | Fc receptor, IgG, low affinity Iib/FcgRII/CD32                                |
| 102372_at                  | immunoglobulin joining chain/Igj                                              |
| 102585_f_at                | Mus musculus mRNA for immunoglobulin light chain V region, partial cds        |
| 102712_at                  | serum amyloid A 3/Saa3                                                        |
| 102860_at                  | Spi2-1/Serpina3g/serine protease inhibitor 2-1                                |
| 102914_s_at                | B-cell leukemia/lymphoma 2 related protein A1b/Bcl2a1b                        |
| 103016_s_at                | CD68 antigen                                                                  |
| 103040_at                  | CD83 antigen                                                                  |
| 103089_at                  | CD48 antigen                                                                  |
| 103226_at                  | mannose receptor, C type 1/Mrc1                                               |
| 103507_at                  | Ly71/EGF-like module containing, mucin-like, hormone receptor-like sequence 1 |
| 103662_at                  | neutrophil cytosolic factor 4/p40phox                                         |
| 103690_at                  | Williams-Beuren syndrome chromosome 5 homolog/Wbscr5                          |
| 103977_at                  | coagulation factor X / Cf10                                                   |
| 104388_at                  | chemokine (C-C motif) ligand 9/Ccl9/MIP-1 gamma                               |
| 104606_at                  | CD52 antigen                                                                  |
| 160406_at                  | cathepsin K                                                                   |
| 160509_at                  | AMCase                                                                        |
| 161898_i_at                | metaxin 1/Mtx1                                                                |
| 161968_f_at                | chemokine (C-C motif) receptor 5/Ccr5                                         |
| 162198_f_at                | chemokine (C-C motif) ligand 6/Ccl6                                           |
| 162287_r_at                | Clca3/Gob-5                                                                   |

Supplemental Table 3.

| Affymetrix<br>Probe Set ID | q-value | F test | OVAc<br>Geometric<br>Mean | OVA<br>Geometric<br>Mean | TMAc<br>Geometric<br>Mean | TMA<br>Geometric<br>Mean |
|----------------------------|---------|--------|---------------------------|--------------------------|---------------------------|--------------------------|
| 100001_at                  |         | 0.262  | 0.813                     | 0.887                    | 0.831                     | 0.915                    |
| 100002_at                  |         | 0.267  | 0.837                     | 0.860                    | 0.903                     | 0.889                    |
| 100003_at                  |         | 0.500  | 1.016                     | 1.014                    | 1.132                     | 1.011                    |
| 100004_at                  |         | 0.384  | 0.995                     | 1.005                    | 1.031                     | 1.024                    |
| 100005_at                  |         | 0.193  | 0.877                     | 0.870                    | 0.966                     | 0.887                    |
| 100006_at                  |         | 0.255  | 1.046                     | 1.138                    | 1.002                     | 1.230                    |
| 100007_at                  |         | 0.229  | 1.014                     | 0.931                    | 1.026                     | 0.945                    |
| 100009_r_at                |         | 0.219  | 1.341                     | 1.483                    | 1.135                     | 1.066                    |
| 100010_at                  |         | 0.166  | 0.812                     | 0.869                    | 1.018                     | 0.888                    |
| 100011_at                  |         | 0.421  | 1.093                     | 1.082                    | 1.089                     | 1.179                    |
| 100012_at                  |         | 0.445  | 1.355                     | 1.444                    | 1.184                     | 1.391                    |
| 100013_at                  |         | 0.283  | 1.034                     | 0.984                    | 0.850                     | 0.986                    |
| 100014_at                  |         | 0.276  | 1.018                     | 1.005                    | 0.964                     | 1.081                    |
| 100015_at                  |         | 0.193  | 0.996                     | 0.968                    | 0.888                     | 1.041                    |
| 100016_at                  |         | 0.324  | 0.986                     | 0.938                    | 0.991                     | 1.007                    |
| 100017_at                  |         | 0.461  | 0.835                     | 0.844                    | 0.947                     | 0.834                    |
| 100018_at                  |         | 0.470  | 0.841                     | 0.840                    | 0.907                     | 0.843                    |
| 100019_at                  |         | 0.119  | 0.940                     | 1.047                    | 1.133                     | 1.021                    |
| 100020_at                  |         | 0.140  | 1.140                     | 1.284                    | 1.097                     | 1.084                    |
| 100021_at                  |         | 0.323  | 0.797                     | 0.807                    | 0.858                     | 0.851                    |
| 100022_at                  |         | 0.177  | 1.011                     | 1.188                    | 1.028                     | 0.988                    |
| 100023_at                  |         | 0.434  | 0.865                     | 0.839                    | 0.943                     | 0.834                    |
| 100024_at                  |         | 0.159  | 1.426                     | 1.184                    | 0.951                     | 1.205                    |
| 100026_at                  |         | 0.379  | 0.894                     | 0.892                    | 0.965                     | 0.911                    |
| 100027_s_at                |         | 0.077  | 0.977                     | 0.923                    | 0.963                     | 0.878                    |
| 100028_r_at                |         | 0.408  | 0.801                     | 0.793                    | 0.885                     | 0.760                    |
| 100029_at                  |         | 0.140  | 0.901                     | 0.932                    | 0.998                     | 0.931                    |
| 100030_at                  |         | 0.108  | 0.930                     | 0.914                    | 0.917                     | 1.002                    |
| 100032_at                  |         | 0.175  | 1.143                     | 1.045                    | 0.908                     | 1.023                    |
| 100033_at                  |         | 0.314  | 1.046                     | 1.013                    | 0.978                     | 1.019                    |
| 100034_at                  |         | 0.429  | 0.942                     | 0.955                    | 0.979                     | 0.980                    |
| 100035_at                  |         | 0.468  | 0.888                     | 0.875                    | 0.933                     | 0.887                    |
| 100037_at                  |         | 0.463  | 0.870                     | 0.896                    | 0.913                     | 0.937                    |
| 100039_at                  |         | 0.124  | 0.997                     | 1.089                    | 0.983                     | 1.143                    |
| 100040_at                  |         | 0.461  | 1.014                     | 1.058                    | 1.035                     | 1.028                    |
| 100041_at                  |         | 0.323  | 1.192                     | 1.341                    | 1.152                     | 1.218                    |
| 100042_at                  |         | 0.174  | 0.846                     | 0.862                    | 0.939                     | 0.908                    |
| 100043_f_at                |         | 0.126  | 0.868                     | 0.789                    | 0.935                     | 0.846                    |
| 100044_at                  |         | 0.384  | 0.953                     | 0.964                    | 0.992                     | 0.997                    |
| 100046_at                  |         | 0.283  | 0.978                     | 1.057                    | 0.988                     | 1.051                    |
| 100047_at                  |         | 0.470  | 0.888                     | 0.844                    | 0.921                     | 0.878                    |
| 100048_at                  |         | 0.201  | 0.923                     | 1.056                    | 0.970                     | 1.093                    |
| 100049_at                  |         | 0.481  | 0.925                     | 0.898                    | 0.966                     | 0.875                    |
| 100050_at                  |         | 0.154  | 1.177                     | 1.015                    | 0.978                     | 1.214                    |

|             |       |       |       |       |       |
|-------------|-------|-------|-------|-------|-------|
| 100051_at   | 0.142 | 0.928 | 0.911 | 1.003 | 1.000 |
| 100052_at   | 0.427 | 0.864 | 0.874 | 0.981 | 0.880 |
| 100054_s_at | 0.320 | 0.988 | 0.961 | 0.946 | 0.941 |
| 100056_at   | 0.158 | 1.026 | 1.016 | 0.915 | 1.026 |
| 100057_at   | 0.159 | 0.986 | 1.024 | 0.931 | 1.062 |
| 100058_at   | 0.360 | 1.064 | 1.049 | 1.055 | 1.103 |
| 100059_at   | 0.075 | 1.002 | 1.273 | 0.927 | 1.296 |
| 100060_i_at | 0.344 | 1.028 | 1.090 | 1.035 | 1.012 |
| 100061_f_at | 0.216 | 0.834 | 0.961 | 0.896 | 0.864 |
| 100062_at   | 0.220 | 1.104 | 1.292 | 0.985 | 1.209 |
| 100064_f_at | 0.201 | 1.317 | 1.389 | 1.003 | 1.445 |
| 100065_r_at | 0.406 | 1.294 | 1.277 | 1.162 | 1.449 |
| 100066_at   | 0.108 | 1.043 | 0.965 | 0.954 | 0.960 |
| 100067_at   | 0.372 | 0.954 | 0.911 | 1.037 | 0.949 |
| 100068_at   | 0.069 | 1.047 | 1.081 | 1.067 | 0.929 |
| 100069_at   | 0.041 | 0.855 | 0.682 | 1.057 | 0.806 |
| 100071_at   | 0.269 | 0.876 | 0.803 | 0.905 | 0.844 |
| 100072_at   | 0.323 | 1.037 | 1.061 | 0.980 | 1.084 |
| 100073_at   | 0.313 | 1.024 | 1.121 | 1.056 | 1.201 |
| 100074_at   | 0.064 | 0.933 | 0.989 | 1.119 | 0.869 |
| 100078_at   | 0.396 | 0.822 | 0.819 | 0.898 | 0.808 |
| 100079_at   | 0.486 | 0.996 | 1.053 | 1.060 | 1.029 |
| 100080_at   | 0.419 | 0.870 | 0.814 | 0.898 | 0.824 |
| 100081_at   | 0.154 | 1.047 | 0.964 | 1.070 | 0.862 |
| 100082_at   | 0.385 | 0.852 | 0.789 | 0.905 | 0.830 |
| 100084_at   | 0.184 | 1.171 | 1.119 | 0.974 | 1.014 |
| 100085_at   | 0.410 | 0.849 | 0.789 | 0.874 | 0.849 |
| 100086_at   | 0.289 | 0.999 | 0.952 | 0.981 | 1.007 |
| 100088_at   | 0.396 | 1.212 | 1.187 | 0.994 | 1.186 |
| 100089_at   | 0.350 | 1.234 | 1.228 | 1.058 | 1.395 |
| 100091_at   | 0.070 | 0.958 | 1.057 | 0.908 | 0.948 |
| 100093_at   | 0.369 | 1.155 | 1.104 | 1.140 | 1.108 |
| 100094_at   | 0.274 | 1.063 | 1.031 | 1.006 | 0.966 |
| 100095_at   | 0.320 | 0.978 | 1.056 | 1.073 | 1.108 |
| 100099_at   | 0.303 | 1.045 | 1.112 | 1.072 | 1.056 |
| 100100_at   | 0.357 | 0.875 | 0.888 | 0.947 | 0.908 |
| 100101_at   | 0.431 | 1.051 | 1.053 | 1.064 | 1.025 |
| 100103_f_at | 0.355 | 0.943 | 0.916 | 0.976 | 0.975 |
| 100104_r_at | 0.306 | 0.936 | 0.913 | 0.985 | 0.901 |
| 100106_at   | 0.388 | 0.879 | 0.873 | 0.942 | 0.901 |
| 100109_s_at | 0.282 | 0.842 | 0.763 | 1.233 | 0.846 |
| 100112_at   | 0.100 | 1.303 | 1.051 | 1.129 | 1.306 |
| 100113_s_at | 0.307 | 1.196 | 1.041 | 1.026 | 1.093 |
| 100115_at   | 0.258 | 1.002 | 1.042 | 1.002 | 1.057 |
| 100116_at   | 0.081 | 1.091 | 1.565 | 1.058 | 1.366 |
| 100117_at   | 0.499 | 0.874 | 0.871 | 0.899 | 0.867 |
| 100120_at   | 0.077 | 1.086 | 0.934 | 1.009 | 1.125 |

|             |       |       |       |       |       |
|-------------|-------|-------|-------|-------|-------|
| 100122_at   | 0.452 | 1.025 | 0.980 | 0.991 | 1.012 |
| 100123_f_at | 0.232 | 1.391 | 1.370 | 1.109 | 1.302 |
| 100124_r_at | 0.246 | 1.214 | 1.154 | 1.092 | 1.209 |
| 100125_at   | 0.275 | 1.057 | 0.966 | 1.064 | 0.991 |
| 100126_at   | 0.276 | 1.072 | 1.054 | 0.936 | 1.115 |
| 100127_at   | 0.249 | 0.924 | 0.941 | 1.019 | 0.944 |
| 100128_at   | 0.053 | 1.008 | 1.324 | 1.076 | 1.373 |
| 100130_at   | 0.292 | 1.058 | 0.971 | 1.028 | 1.005 |
| 100131_at   | 0.382 | 0.869 | 0.876 | 0.908 | 0.841 |
| 100133_at   | 0.361 | 1.131 | 1.122 | 0.957 | 1.188 |
| 100134_at   | 0.126 | 1.135 | 1.012 | 1.019 | 1.002 |
| 100136_at   | 0.223 | 1.192 | 1.287 | 1.036 | 1.225 |
| 100138_f_at | 0.355 | 1.246 | 1.227 | 1.103 | 1.153 |
| 100139_at   | 0.235 | 0.915 | 0.879 | 1.008 | 0.844 |
| 100141_at   | 0.502 | 0.833 | 0.802 | 0.895 | 0.803 |
| 100142_at   | 0.176 | 1.160 | 1.097 | 1.077 | 1.073 |
| 100143_at   | 0.428 | 0.829 | 0.745 | 0.866 | 0.774 |
| 100144_at   | 0.096 | 1.237 | 1.369 | 1.021 | 1.254 |
| 100147_at   | 0.201 | 0.984 | 0.896 | 1.022 | 0.967 |
| 100148_at   | 0.320 | 1.237 | 1.227 | 1.029 | 1.178 |
| 100149_at   | 0.386 | 0.861 | 0.830 | 0.930 | 0.845 |
| 100150_f_at | 0.450 | 0.885 | 0.870 | 0.938 | 0.867 |
| 100151_at   | 0.465 | 1.201 | 1.243 | 1.128 | 1.212 |
| 100152_at   | 0.294 | 0.971 | 0.905 | 0.954 | 0.894 |
| 100153_at   | 0.199 | 0.859 | 0.790 | 0.952 | 0.825 |
| 100154_at   | 0.235 | 1.325 | 1.421 | 1.179 | 1.233 |
| 100155_at   | 0.475 | 1.128 | 1.100 | 1.103 | 1.094 |
| 100156_at   | 0.017 | 1.043 | 1.500 | 0.998 | 1.230 |
| 100213_f_at | 0.075 | 1.068 | 1.112 | 1.003 | 1.083 |
| 100225_f_at | 0.051 | 1.071 | 1.021 | 0.965 | 1.071 |
| 100272_at   | 0.281 | 0.889 | 0.879 | 0.982 | 0.885 |
| 100277_at   | 0.269 | 0.947 | 0.899 | 1.005 | 0.933 |
| 100278_at   | 0.468 | 0.886 | 0.818 | 0.865 | 0.869 |
| 100279_at   | 0.205 | 0.903 | 0.970 | 1.007 | 0.954 |
| 100280_at   | 0.472 | 0.872 | 0.839 | 0.923 | 0.845 |
| 100281_at   | 0.392 | 0.949 | 0.904 | 0.954 | 0.955 |
| 100282_at   | 0.383 | 0.893 | 0.889 | 0.968 | 0.891 |
| 100283_at   | 0.333 | 0.827 | 0.791 | 0.908 | 0.830 |
| 100284_at   | 0.349 | 0.904 | 0.904 | 0.993 | 0.911 |
| 100285_at   | 0.388 | 0.885 | 0.851 | 0.945 | 0.889 |
| 100286_at   | 0.459 | 0.904 | 0.902 | 0.898 | 0.842 |
| 100287_at   | 0.445 | 0.922 | 0.866 | 0.896 | 0.862 |
| 100289_at   | 0.308 | 0.813 | 0.761 | 0.912 | 0.791 |
| 100290_f_at | 0.500 | 1.156 | 1.151 | 1.110 | 1.147 |
| 100291_at   | 0.374 | 0.866 | 0.873 | 0.905 | 0.900 |
| 100292_at   | 0.407 | 0.866 | 0.892 | 0.898 | 0.838 |
| 100293_at   | 0.157 | 0.940 | 0.915 | 1.044 | 1.030 |

|             |       |       |       |       |       |
|-------------|-------|-------|-------|-------|-------|
| 100294_at   | 0.392 | 0.868 | 0.826 | 0.912 | 0.882 |
| 100295_at   | 0.406 | 0.863 | 0.925 | 0.906 | 0.895 |
| 100296_at   | 0.309 | 0.887 | 0.896 | 0.987 | 0.910 |
| 100297_at   | 0.474 | 1.164 | 1.137 | 1.088 | 1.164 |
| 100298_at   | 0.431 | 0.862 | 0.803 | 0.917 | 0.831 |
| 100299_f_at | 0.094 | 1.054 | 2.139 | 0.871 | 0.909 |
| 100300_at   | 0.209 | 0.840 | 1.086 | 0.926 | 1.255 |
| 100301_at   | 0.233 | 0.795 | 0.840 | 0.913 | 0.832 |
| 100302_at   | 0.216 | 0.827 | 0.836 | 0.928 | 0.801 |
| 100303_at   | 0.475 | 0.864 | 0.840 | 0.887 | 0.859 |
| 100304_at   | 0.323 | 0.812 | 0.759 | 0.910 | 0.854 |
| 100305_g_at | 0.488 | 0.934 | 0.899 | 0.929 | 0.908 |
| 100306_at   | 0.265 | 0.973 | 0.950 | 0.922 | 1.020 |
| 100307_at   | 0.079 | 0.825 | 0.837 | 1.197 | 0.797 |
| 100308_at   | 0.289 | 1.012 | 0.945 | 0.937 | 0.897 |
| 100309_at   | 0.440 | 0.925 | 0.950 | 0.998 | 1.003 |
| 100311_f_at | 0.066 | 0.905 | 1.529 | 0.973 | 1.689 |
| 100313_at   | 0.128 | 0.774 | 0.814 | 0.993 | 1.018 |
| 100314_f_at | 0.481 | 0.856 | 0.811 | 0.918 | 0.847 |
| 100315_at   | 0.185 | 0.947 | 0.916 | 0.841 | 1.143 |
| 100317_at   | 0.132 | 1.005 | 0.957 | 1.068 | 1.012 |
| 100318_at   | 0.240 | 0.945 | 0.931 | 1.027 | 0.932 |
| 100319_at   | 0.367 | 0.813 | 0.855 | 0.887 | 0.829 |
| 100320_at   | 0.273 | 0.847 | 0.855 | 0.941 | 0.951 |
| 100321_f_at | 0.166 | 0.945 | 0.981 | 0.924 | 0.999 |
| 100322_at   | 0.058 | 1.202 | 2.213 | 0.912 | 1.061 |
| 100323_at   | 0.497 | 1.017 | 1.037 | 1.002 | 1.031 |
| 100324_g_at | 0.302 | 0.831 | 0.823 | 0.916 | 0.877 |
| 100325_at   | 0.136 | 1.415 | 2.251 | 1.229 | 2.028 |
| 100326_f_at | 0.295 | 0.829 | 0.807 | 0.873 | 0.881 |
| 100327_at   | 0.267 | 0.909 | 0.832 | 0.982 | 0.962 |
| 100328_s_at | 0.151 | 0.873 | 1.017 | 0.932 | 1.176 |
| 100329_at   | 0.209 | 0.766 | 0.682 | 0.802 | 0.742 |
| 100330_at   | 0.484 | 0.903 | 0.898 | 0.944 | 0.883 |
| 100331_g_at | 0.357 | 1.072 | 1.141 | 1.004 | 1.108 |
| 100332_s_at | 0.499 | 0.947 | 0.923 | 0.956 | 1.000 |
| 100333_at   | 0.165 | 0.843 | 0.737 | 0.841 | 0.858 |
| 100334_f_at | 0.361 | 0.922 | 0.929 | 0.986 | 0.939 |
| 100335_at   | 0.429 | 0.781 | 0.768 | 0.853 | 0.811 |
| 100336_s_at | 0.415 | 0.859 | 0.827 | 0.925 | 0.804 |
| 100337_at   | 0.361 | 0.888 | 0.844 | 0.928 | 0.909 |
| 100338_s_at | 0.428 | 0.922 | 0.883 | 0.955 | 0.913 |
| 100339_at   | 0.140 | 0.894 | 0.837 | 1.012 | 0.912 |
| 100340_at   | 0.188 | 1.051 | 1.011 | 1.039 | 0.982 |
| 100341_g_at | 0.397 | 0.862 | 0.809 | 0.901 | 0.859 |
| 100342_i_at | 0.246 | 1.158 | 1.087 | 0.986 | 1.152 |
| 100343_f_at | 0.260 | 1.201 | 1.232 | 1.105 | 1.158 |

|             |       |       |       |       |       |
|-------------|-------|-------|-------|-------|-------|
| 100344_at   | 0.402 | 0.811 | 0.823 | 0.791 | 0.884 |
| 100345_f_at | 0.094 | 1.185 | 1.083 | 1.010 | 1.149 |
| 100346_at   | 0.484 | 0.893 | 0.877 | 0.930 | 0.877 |
| 100347_at   | 0.283 | 0.937 | 0.837 | 0.968 | 0.908 |
| 100348_at   | 0.110 | 0.769 | 0.769 | 0.752 | 1.021 |
| 100349_at   | 0.307 | 0.937 | 0.876 | 0.962 | 0.919 |
| 100350_at   | 0.298 | 0.900 | 0.856 | 0.970 | 0.936 |
| 100351_f_at | 0.327 | 0.882 | 0.834 | 0.936 | 0.923 |
| 100352_at   | 0.379 | 0.982 | 0.947 | 0.966 | 0.994 |
| 100353_g_at | 0.355 | 0.979 | 0.993 | 0.967 | 1.020 |
| 100354_at   | 0.443 | 0.941 | 0.921 | 0.971 | 0.914 |
| 100355_g_at | 0.346 | 0.899 | 0.811 | 0.961 | 0.869 |
| 100356_at   | 0.246 | 0.851 | 0.779 | 0.876 | 0.793 |
| 100357_g_at | 0.329 | 0.897 | 0.865 | 0.956 | 0.906 |
| 100358_s_at | 0.240 | 0.819 | 0.922 | 0.880 | 0.823 |
| 100359_at   | 0.297 | 0.893 | 0.845 | 0.932 | 0.878 |
| 100360_f_at | 0.176 | 0.873 | 1.385 | 0.859 | 0.877 |
| 100361_f_at | 0.375 | 0.846 | 0.937 | 0.911 | 0.905 |
| 100362_f_at | 0.137 | 0.927 | 2.133 | 0.828 | 0.892 |
| 100363_at   | 0.468 | 0.935 | 0.911 | 0.971 | 0.907 |
| 100364_at   | 0.273 | 0.914 | 0.883 | 1.009 | 0.897 |
| 100365_at   | 0.406 | 0.896 | 0.881 | 0.960 | 0.892 |
| 100366_at   | 0.357 | 0.800 | 0.824 | 0.897 | 0.874 |
| 100367_g_at | 0.147 | 0.905 | 0.948 | 1.018 | 1.002 |
| 100368_at   | 0.184 | 0.776 | 0.942 | 0.994 | 0.928 |
| 100369_at   | 0.303 | 0.859 | 0.890 | 0.992 | 0.948 |
| 100370_at   | 0.422 | 0.893 | 0.854 | 0.943 | 0.853 |
| 100371_at   | 0.241 | 0.930 | 0.894 | 0.913 | 0.950 |
| 100372_at   | 0.456 | 0.848 | 0.812 | 0.852 | 0.840 |
| 100373_at   | 0.398 | 0.898 | 0.821 | 0.947 | 0.864 |
| 100374_at   | 0.465 | 0.820 | 0.820 | 0.861 | 0.844 |
| 100375_i_at | 0.308 | 0.966 | 0.913 | 1.012 | 0.940 |
| 100376_f_at | 0.124 | 0.940 | 2.170 | 0.867 | 0.921 |
| 100377_f_at | 0.271 | 0.917 | 1.396 | 0.968 | 0.894 |
| 100378_at   | 0.262 | 0.876 | 0.798 | 0.959 | 0.908 |
| 100379_f_at | 0.434 | 0.918 | 0.850 | 0.865 | 0.833 |
| 100380_at   | 0.494 | 1.228 | 1.333 | 1.236 | 1.323 |
| 100381_at   | 0.320 | 1.606 | 0.839 | 2.818 | 0.857 |
| 100382_at   | 0.184 | 0.884 | 0.840 | 0.964 | 0.853 |
| 100383_at   | 0.458 | 0.885 | 0.890 | 0.944 | 0.889 |
| 100384_at   | 0.423 | 0.907 | 0.865 | 0.928 | 0.838 |
| 100385_at   | 0.383 | 0.876 | 0.836 | 0.941 | 0.858 |
| 100386_at   | 0.219 | 0.838 | 0.849 | 0.984 | 0.871 |
| 100387_f_at | 0.373 | 0.816 | 0.825 | 0.830 | 0.842 |
| 100388_at   | 0.359 | 0.889 | 0.851 | 0.988 | 0.911 |
| 100389_at   | 0.365 | 0.805 | 0.788 | 0.893 | 0.812 |
| 100390_s_at | 0.497 | 0.849 | 0.852 | 0.889 | 0.831 |

|             |       |       |       |       |       |
|-------------|-------|-------|-------|-------|-------|
| 100391_at   | 0.504 | 0.926 | 0.913 | 0.946 | 0.919 |
| 100392_at   | 0.214 | 0.823 | 0.850 | 0.919 | 0.910 |
| 100393_at   | 0.492 | 0.945 | 0.950 | 0.978 | 0.956 |
| 100394_at   | 0.176 | 0.737 | 0.818 | 0.903 | 0.807 |
| 100395_at   | 0.308 | 0.827 | 0.836 | 0.893 | 0.874 |
| 100396_i_at | 0.461 | 0.775 | 0.694 | 0.847 | 0.753 |
| 100397_at   | 0.084 | 0.897 | 1.232 | 0.848 | 1.320 |
| 100398_at   | 0.183 | 0.962 | 0.998 | 0.941 | 0.982 |
| 100400_at   | 0.337 | 1.072 | 1.118 | 1.022 | 1.207 |
| 100401_at   | 0.161 | 1.144 | 1.018 | 1.012 | 1.069 |
| 100402_f_at | 0.434 | 0.906 | 0.875 | 0.865 | 0.865 |
| 100403_at   | 0.376 | 0.655 | 0.472 | 0.756 | 0.595 |
| 100404_at   | 0.240 | 0.903 | 0.891 | 0.960 | 0.933 |
| 100405_at   | 0.301 | 1.070 | 1.075 | 1.056 | 1.196 |
| 100406_at   | 0.258 | 0.843 | 0.851 | 0.967 | 0.886 |
| 100407_at   | 0.401 | 0.894 | 0.865 | 0.964 | 0.876 |
| 100408_at   | 0.232 | 0.956 | 1.023 | 0.966 | 1.045 |
| 100409_at   | 0.248 | 0.946 | 0.888 | 0.996 | 0.929 |
| 100410_at   | 0.222 | 0.983 | 0.927 | 0.944 | 1.022 |
| 100411_at   | 0.418 | 0.815 | 0.772 | 0.815 | 0.799 |
| 100412_g_at | 0.235 | 0.906 | 0.858 | 1.041 | 0.888 |
| 100413_at   | 0.238 | 1.071 | 0.970 | 1.061 | 1.025 |
| 100414_s_at | 0.415 | 0.941 | 0.942 | 1.014 | 0.933 |
| 100415_at   | 0.480 | 0.957 | 0.943 | 0.979 | 0.952 |
| 100416_at   | 0.275 | 0.931 | 0.923 | 0.935 | 0.956 |
| 100417_at   | 0.454 | 0.968 | 0.936 | 0.952 | 0.948 |
| 100418_at   | 0.105 | 0.922 | 0.968 | 0.933 | 1.003 |
| 100420_at   | 0.459 | 0.824 | 0.779 | 0.841 | 0.826 |
| 100421_at   | 0.291 | 0.863 | 0.815 | 1.634 | 0.867 |
| 100422_i_at | 0.290 | 0.916 | 0.893 | 0.999 | 0.924 |
| 100423_f_at | 0.390 | 0.935 | 0.909 | 0.986 | 0.946 |
| 100424_at   | 0.387 | 0.992 | 0.922 | 1.035 | 0.956 |
| 100425_at   | 0.256 | 0.974 | 1.040 | 1.008 | 1.030 |
| 100426_s_at | 0.303 | 0.865 | 0.945 | 0.932 | 0.933 |
| 100427_at   | 0.335 | 0.974 | 0.997 | 1.001 | 1.068 |
| 100428_at   | 0.155 | 1.418 | 1.202 | 1.112 | 1.484 |
| 100429_at   | 0.257 | 0.900 | 0.882 | 0.938 | 0.948 |
| 100430_at   | 0.452 | 0.843 | 0.821 | 0.919 | 0.846 |
| 100431_at   | 0.336 | 1.145 | 1.062 | 1.029 | 1.134 |
| 100432_f_at | 0.392 | 0.892 | 0.810 | 0.924 | 0.837 |
| 100433_r_at | 0.500 | 0.858 | 0.810 | 0.894 | 0.814 |
| 100434_s_at | 0.441 | 0.897 | 0.846 | 0.980 | 0.863 |
| 100435_at   | 0.189 | 1.012 | 1.049 | 1.072 | 0.969 |
| 100436_at   | 0.277 | 0.907 | 0.836 | 1.398 | 0.844 |
| 100437_g_at | 0.239 | 0.960 | 0.793 | 1.410 | 0.807 |
| 100438_at   | 0.328 | 0.823 | 0.803 | 0.885 | 0.847 |
| 100439_i_at | 0.235 | 0.833 | 0.828 | 0.916 | 0.931 |

|             |       |       |       |       |       |
|-------------|-------|-------|-------|-------|-------|
| 100440_f_at | 0.260 | 0.849 | 0.822 | 0.956 | 0.898 |
| 100441_s_at | 0.212 | 0.937 | 0.850 | 1.018 | 0.854 |
| 100442_at   | 0.174 | 0.900 | 0.853 | 0.972 | 0.883 |
| 100443_at   | 0.053 | 1.074 | 1.116 | 1.284 | 0.885 |
| 100444_at   | 0.494 | 1.075 | 1.084 | 1.043 | 1.078 |
| 100445_f_at | 0.255 | 0.897 | 0.916 | 1.044 | 0.936 |
| 100446_r_at | 0.359 | 0.942 | 0.851 | 0.957 | 0.892 |
| 100447_at   | 0.465 | 0.913 | 0.876 | 0.925 | 0.892 |
| 100448_at   | 0.239 | 0.848 | 0.859 | 1.020 | 0.978 |
| 100449_g_at | 0.288 | 0.922 | 0.918 | 0.964 | 0.902 |
| 100450_r_at | 0.349 | 0.933 | 0.893 | 0.971 | 0.902 |
| 100451_at   | 0.070 | 0.933 | 0.900 | 0.991 | 0.867 |
| 100452_at   | 0.472 | 0.893 | 0.883 | 0.952 | 0.892 |
| 100453_at   | 0.425 | 0.895 | 0.865 | 0.918 | 0.857 |
| 100454_at   | 0.285 | 0.943 | 0.888 | 0.954 | 0.887 |
| 100455_at   | 0.310 | 0.912 | 0.884 | 0.878 | 0.874 |
| 100457_at   | 0.386 | 1.244 | 1.218 | 1.107 | 1.198 |
| 100458_at   | 0.330 | 0.880 | 0.853 | 0.918 | 0.895 |
| 100459_at   | 0.423 | 1.037 | 0.974 | 1.014 | 1.083 |
| 100460_at   | 0.438 | 1.100 | 1.086 | 1.032 | 1.083 |
| 100461_at   | 0.337 | 1.060 | 1.073 | 1.000 | 1.078 |
| 100462_at   | 0.081 | 0.883 | 0.854 | 0.881 | 0.955 |
| 100463_at   | 0.442 | 0.942 | 0.943 | 1.000 | 0.951 |
| 100464_at   | 0.500 | 1.221 | 1.272 | 1.196 | 1.289 |
| 100465_i_at | 0.246 | 0.989 | 0.915 | 0.964 | 0.970 |
| 100466_f_at | 0.333 | 0.953 | 0.934 | 0.989 | 0.994 |
| 100467_at   | 0.269 | 0.958 | 0.932 | 0.929 | 0.975 |
| 100468_g_at | 0.367 | 1.111 | 1.226 | 1.016 | 1.122 |
| 100469_at   | 0.234 | 1.067 | 0.987 | 0.989 | 1.045 |
| 100470_at   | 0.378 | 0.915 | 0.874 | 0.938 | 0.909 |
| 100471_at   | 0.145 | 0.997 | 0.909 | 1.004 | 0.987 |
| 100472_at   | 0.444 | 1.080 | 1.023 | 1.024 | 1.060 |
| 100473_at   | 0.255 | 1.105 | 1.099 | 0.975 | 1.006 |
| 100474_at   | 0.330 | 0.976 | 0.906 | 0.998 | 0.909 |
| 100475_at   | 0.290 | 1.346 | 1.322 | 1.087 | 1.333 |
| 100476_at   | 0.193 | 1.021 | 0.974 | 1.040 | 0.974 |
| 100477_at   | 0.305 | 1.072 | 1.074 | 1.114 | 1.187 |
| 100479_at   | 0.234 | 0.937 | 1.046 | 0.960 | 0.956 |
| 100481_at   | 0.308 | 0.899 | 0.857 | 0.957 | 0.893 |
| 100482_at   | 0.197 | 1.047 | 0.961 | 1.007 | 0.990 |
| 100483_at   | 0.250 | 1.099 | 1.085 | 1.019 | 1.148 |
| 100484_at   | 0.146 | 0.859 | 0.925 | 0.985 | 0.848 |
| 100486_at   | 0.274 | 1.214 | 1.123 | 1.029 | 1.129 |
| 100488_at   | 0.081 | 0.951 | 1.120 | 0.931 | 1.043 |
| 100489_at   | 0.267 | 1.166 | 1.040 | 1.089 | 1.204 |
| 100491_at   | 0.361 | 1.032 | 0.980 | 1.043 | 0.999 |
| 100492_at   | 0.067 | 1.151 | 1.130 | 1.016 | 1.001 |



|             |       |       |       |       |       |
|-------------|-------|-------|-------|-------|-------|
| 100493_at   | 0.419 | 0.904 | 0.839 | 0.922 | 0.869 |
| 100494_at   | 0.256 | 0.947 | 0.955 | 1.019 | 1.100 |
| 100495_at   | 0.136 | 0.966 | 0.888 | 0.966 | 0.946 |
| 100496_at   | 0.281 | 1.034 | 0.941 | 1.046 | 0.991 |
| 100497_at   | 0.441 | 0.935 | 0.886 | 0.931 | 0.843 |
| 100498_g_at | 0.272 | 0.962 | 0.922 | 1.030 | 1.050 |
| 100499_at   | 0.179 | 1.391 | 1.266 | 1.063 | 1.431 |
| 100500_at   | 0.357 | 0.901 | 0.900 | 0.940 | 0.944 |
| 100501_at   | 0.341 | 0.900 | 0.831 | 0.924 | 0.842 |
| 100502_at   | 0.410 | 0.924 | 0.869 | 0.925 | 0.923 |
| 100505_at   | 0.449 | 0.967 | 0.954 | 0.994 | 0.971 |
| 100507_at   | 0.090 | 0.861 | 0.873 | 0.957 | 0.803 |
| 100508_at   | 0.094 | 0.979 | 0.916 | 0.944 | 0.995 |
| 100509_at   | 0.224 | 1.256 | 1.189 | 1.004 | 1.191 |
| 100510_at   | 0.344 | 0.895 | 0.817 | 0.919 | 0.851 |
| 100511_at   | 0.301 | 1.042 | 0.996 | 0.910 | 0.998 |
| 100512_at   | 0.443 | 1.061 | 1.115 | 1.018 | 1.093 |
| 100513_at   | 0.431 | 1.083 | 1.103 | 1.053 | 1.182 |
| 100514_at   | 0.445 | 1.194 | 1.169 | 1.038 | 1.264 |
| 100515_at   | 0.375 | 0.943 | 0.902 | 0.952 | 0.918 |
| 100516_at   | 0.277 | 1.021 | 0.965 | 0.952 | 0.990 |
| 100518_at   | 0.468 | 0.818 | 0.823 | 0.894 | 0.827 |
| 100521_at   | 0.114 | 0.926 | 1.021 | 0.971 | 0.930 |
| 100522_s_at | 0.438 | 1.186 | 1.261 | 1.103 | 1.238 |
| 100523_r_at | 0.360 | 1.026 | 0.999 | 0.985 | 1.053 |
| 100525_at   | 0.359 | 0.930 | 0.893 | 0.957 | 0.877 |
| 100526_f_at | 0.241 | 0.962 | 0.851 | 0.883 | 0.908 |
| 100527_at   | 0.190 | 1.074 | 1.117 | 0.999 | 1.200 |
| 100528_at   | 0.337 | 1.110 | 1.050 | 1.117 | 1.100 |
| 100529_at   | 0.170 | 0.867 | 0.880 | 0.971 | 0.922 |
| 100530_at   | 0.051 | 0.939 | 0.944 | 1.018 | 0.917 |
| 100533_s_at | 0.096 | 0.967 | 0.964 | 0.897 | 1.146 |
| 100534_at   | 0.301 | 1.201 | 1.125 | 1.057 | 1.173 |
| 100535_at   | 0.392 | 1.215 | 1.155 | 1.043 | 1.191 |
| 100536_at   | 0.390 | 0.853 | 0.850 | 0.909 | 0.917 |
| 100537_at   | 0.388 | 0.985 | 0.913 | 0.941 | 0.888 |
| 100538_at   | 0.047 | 0.983 | 0.834 | 0.941 | 0.760 |
| 100539_at   | 0.196 | 1.243 | 1.311 | 1.131 | 1.306 |
| 100540_at   | 0.378 | 1.072 | 1.188 | 1.021 | 1.201 |
| 100542_at   | 0.484 | 0.895 | 0.869 | 0.939 | 0.858 |
| 100543_s_at | 0.150 | 1.185 | 1.151 | 1.010 | 1.176 |
| 100544_at   | 0.240 | 0.925 | 0.940 | 0.972 | 0.995 |
| 100546_at   | 0.337 | 1.006 | 0.980 | 0.996 | 1.011 |
| 100547_at   | 0.222 | 0.968 | 0.895 | 0.950 | 0.960 |
| 100548_at   | 0.285 | 1.067 | 0.992 | 0.989 | 1.026 |
| 100549_at   | 0.428 | 0.880 | 0.856 | 0.948 | 0.898 |
| 100550_f_at | 0.492 | 1.089 | 1.092 | 1.054 | 1.069 |

|             |       |       |       |       |       |
|-------------|-------|-------|-------|-------|-------|
| 100551_r_at | 0.495 | 0.762 | 0.753 | 0.819 | 0.749 |
| 100552_at   | 0.276 | 1.030 | 0.972 | 0.981 | 1.065 |
| 100553_at   | 0.478 | 1.000 | 1.035 | 1.016 | 1.019 |
| 100554_at   | 0.496 | 1.007 | 1.065 | 0.997 | 1.038 |
| 100555_at   | 0.467 | 1.193 | 1.229 | 1.123 | 1.320 |
| 100556_at   | 0.468 | 0.972 | 0.932 | 0.949 | 0.912 |
| 100557_g_at | 0.336 | 1.170 | 1.250 | 1.136 | 1.277 |
| 100558_at   | 0.472 | 0.795 | 0.797 | 0.850 | 0.792 |
| 100559_at   | 0.227 | 1.179 | 1.037 | 1.003 | 1.100 |
| 100560_at   | 0.330 | 0.982 | 0.987 | 0.981 | 0.967 |
| 100561_at   | 0.404 | 1.293 | 1.295 | 1.184 | 1.227 |
| 100562_at   | 0.484 | 0.890 | 0.886 | 0.915 | 0.887 |
| 100564_at   | 0.444 | 1.048 | 1.094 | 1.067 | 1.032 |
| 100565_at   | 0.196 | 0.964 | 1.074 | 0.983 | 1.103 |
| 100566_at   | 0.081 | 1.491 | 1.231 | 1.120 | 1.206 |
| 100567_at   | 0.303 | 0.800 | 0.707 | 1.059 | 0.753 |
| 100568_at   | 0.330 | 0.955 | 0.961 | 0.921 | 0.900 |
| 100569_at   | 0.185 | 1.073 | 0.974 | 1.022 | 1.093 |
| 100570_at   | 0.170 | 1.187 | 1.059 | 1.044 | 1.093 |
| 100571_at   | 0.298 | 1.077 | 0.993 | 1.035 | 0.979 |
| 100572_at   | 0.449 | 1.235 | 1.232 | 1.068 | 1.226 |
| 100573_f_at | 0.355 | 1.244 | 1.212 | 1.112 | 1.237 |
| 100574_f_at | 0.219 | 1.485 | 1.516 | 1.220 | 1.472 |
| 100575_at   | 0.441 | 1.152 | 1.218 | 1.070 | 1.179 |
| 100576_at   | 0.201 | 0.998 | 1.090 | 0.996 | 1.059 |
| 100577_at   | 0.384 | 1.164 | 1.188 | 1.103 | 1.151 |
| 100578_at   | 0.303 | 1.068 | 1.203 | 1.008 | 1.141 |
| 100579_s_at | 0.053 | 1.076 | 1.226 | 0.989 | 1.282 |
| 100580_at   | 0.111 | 0.948 | 1.008 | 0.957 | 0.942 |
| 100581_at   | 0.050 | 1.168 | 1.495 | 1.055 | 1.372 |
| 100582_at   | 0.370 | 0.944 | 0.888 | 0.945 | 0.926 |
| 100583_at   | 0.207 | 1.110 | 1.450 | 0.957 | 0.915 |
| 100584_at   | 0.174 | 1.150 | 1.232 | 0.993 | 1.239 |
| 100585_at   | 0.406 | 0.972 | 0.910 | 1.037 | 0.933 |
| 100586_i_at | 0.238 | 0.875 | 0.880 | 0.919 | 0.923 |
| 100587_f_at | 0.417 | 1.066 | 1.092 | 0.991 | 1.034 |
| 100588_at   | 0.067 | 0.945 | 1.034 | 0.855 | 1.046 |
| 100589_at   | 0.276 | 0.858 | 0.824 | 0.889 | 0.742 |
| 100592_at   | 0.245 | 0.905 | 1.009 | 0.968 | 1.020 |
| 100593_at   | 0.429 | 0.745 | 0.644 | 0.788 | 0.638 |
| 100594_at   | 0.474 | 1.188 | 1.161 | 1.122 | 1.176 |
| 100595_at   | 0.421 | 1.164 | 1.209 | 1.139 | 1.126 |
| 100596_at   | 0.046 | 1.064 | 0.759 | 1.071 | 0.944 |
| 100597_at   | 0.232 | 1.029 | 1.261 | 1.073 | 1.299 |
| 100599_at   | 0.276 | 1.012 | 1.082 | 0.967 | 1.003 |
| 100600_at   | 0.089 | 1.249 | 1.579 | 1.101 | 1.170 |
| 100601_at   | 0.210 | 1.104 | 1.026 | 1.062 | 1.151 |

|             |       |       |       |       |       |
|-------------|-------|-------|-------|-------|-------|
| 100602_at   | 0.249 | 0.901 | 0.823 | 0.927 | 0.857 |
| 100603_at   | 0.398 | 1.247 | 1.195 | 1.075 | 1.239 |
| 100605_at   | 0.311 | 0.987 | 0.943 | 1.268 | 0.919 |
| 100606_at   | 0.292 | 1.161 | 1.158 | 1.074 | 1.102 |
| 100607_at   | 0.106 | 1.107 | 1.321 | 1.117 | 1.358 |
| 100608_at   | 0.314 | 1.088 | 1.059 | 0.982 | 1.088 |
| 100609_at   | 0.441 | 0.988 | 0.996 | 1.010 | 1.004 |
| 100610_at   | 0.291 | 1.126 | 1.172 | 1.105 | 1.079 |
| 100611_at   | 0.236 | 1.010 | 0.794 | 1.008 | 1.036 |
| 100612_at   | 0.143 | 1.086 | 1.159 | 1.047 | 1.120 |
| 100613_at   | 0.392 | 1.113 | 1.123 | 1.071 | 1.080 |
| 100614_at   | 0.399 | 0.801 | 0.622 | 0.918 | 0.639 |
| 100615_at   | 0.494 | 0.896 | 0.871 | 0.922 | 0.887 |
| 100616_at   | 0.119 | 0.849 | 0.898 | 0.881 | 0.954 |
| 100617_at   | 0.357 | 0.782 | 0.856 | 0.827 | 0.791 |
| 100618_f_at | 0.318 | 0.883 | 0.985 | 0.954 | 0.959 |
| 100619_r_at | 0.234 | 0.735 | 0.809 | 0.843 | 0.789 |
| 100620_at   | 0.291 | 0.811 | 0.811 | 0.900 | 0.857 |
| 100621_at   | 0.115 | 1.010 | 1.125 | 0.975 | 1.099 |
| 100622_at   | 0.108 | 1.140 | 0.970 | 1.052 | 0.929 |
| 100623_at   | 0.191 | 0.809 | 0.909 | 0.907 | 0.884 |
| 100626_at   | 0.243 | 0.891 | 0.936 | 0.972 | 0.956 |
| 100628_at   | 0.440 | 1.000 | 1.129 | 1.084 | 1.101 |
| 100629_at   | 0.391 | 0.988 | 1.038 | 1.153 | 1.050 |
| 100630_f_at | 0.262 | 1.018 | 0.992 | 1.067 | 1.012 |
| 100631_r_at | 0.313 | 0.883 | 0.853 | 0.898 | 0.873 |
| 100632_at   | 0.130 | 0.987 | 0.948 | 0.894 | 0.958 |
| 100633_at   | 0.423 | 1.201 | 1.196 | 1.106 | 1.151 |
| 100634_at   | 0.299 | 0.909 | 0.845 | 0.913 | 0.904 |
| 100635_at   | 0.350 | 1.067 | 1.085 | 0.975 | 1.064 |
| 100636_at   | 0.318 | 1.022 | 0.969 | 1.088 | 1.065 |
| 100669_at   | 0.417 | 0.932 | 0.935 | 0.976 | 0.929 |
| 100670_at   | 0.348 | 0.817 | 0.826 | 0.863 | 0.822 |
| 100671_at   | 0.341 | 1.067 | 1.003 | 1.050 | 1.034 |
| 100672_at   | 0.434 | 0.936 | 0.982 | 0.967 | 0.948 |
| 100673_f_at | 0.351 | 0.892 | 0.889 | 0.918 | 0.960 |
| 100674_f_at | 0.069 | 0.848 | 0.818 | 0.960 | 0.886 |
| 100675_at   | 0.093 | 0.921 | 0.913 | 0.960 | 0.843 |
| 100676_at   | 0.371 | 0.838 | 0.872 | 0.894 | 0.836 |
| 100677_f_at | 0.424 | 0.876 | 0.840 | 0.927 | 0.845 |
| 100678_s_at | 0.441 | 0.909 | 0.875 | 0.922 | 0.906 |
| 100679_at   | 0.377 | 0.891 | 0.840 | 0.924 | 0.917 |
| 100680_at   | 0.461 | 0.854 | 0.841 | 0.849 | 0.881 |
| 100681_f_at | 0.443 | 0.849 | 0.850 | 0.905 | 0.857 |
| 100682_f_at | 0.096 | 1.019 | 2.258 | 0.849 | 0.950 |
| 100683_r_at | 0.415 | 0.889 | 0.914 | 0.998 | 0.896 |
| 100684_at   | 0.154 | 1.170 | 1.116 | 1.061 | 1.059 |

|             |       |       |       |       |       |
|-------------|-------|-------|-------|-------|-------|
| 100685_at   | 0.472 | 0.896 | 0.886 | 0.933 | 0.878 |
| 100686_at   | 0.181 | 1.009 | 1.156 | 0.987 | 1.120 |
| 100687_f_at | 0.312 | 0.896 | 0.915 | 0.966 | 0.965 |
| 100688_at   | 0.494 | 0.858 | 0.825 | 0.901 | 0.843 |
| 100689_at   | 0.165 | 0.993 | 1.035 | 1.064 | 0.982 |
| 100690_at   | 0.441 | 0.823 | 0.800 | 0.875 | 0.831 |
| 100691_at   | 0.301 | 0.870 | 0.829 | 0.865 | 0.874 |
| 100692_at   | 0.480 | 0.831 | 0.825 | 0.886 | 0.848 |
| 100693_at   | 0.284 | 0.838 | 0.808 | 0.938 | 0.865 |
| 100694_at   | 0.072 | 0.982 | 1.040 | 0.916 | 1.055 |
| 100695_at   | 0.238 | 0.883 | 0.829 | 0.951 | 0.872 |
| 100696_at   | 0.339 | 0.891 | 0.806 | 0.920 | 0.899 |
| 100697_at   | 0.470 | 0.928 | 0.871 | 0.960 | 0.889 |
| 100698_at   | 0.411 | 0.847 | 0.783 | 0.883 | 0.844 |
| 100699_at   | 0.287 | 0.854 | 0.852 | 0.919 | 0.880 |
| 100700_s_at | 0.418 | 0.870 | 0.842 | 0.910 | 0.884 |
| 100701_r_at | 0.505 | 0.824 | 0.780 | 0.875 | 0.782 |
| 100702_at   | 0.307 | 0.904 | 0.843 | 0.985 | 0.866 |
| 100703_at   | 0.231 | 0.869 | 0.816 | 0.943 | 0.892 |
| 100704_at   | 0.484 | 0.911 | 0.914 | 0.937 | 0.912 |
| 100705_at   | 0.329 | 0.927 | 0.893 | 0.939 | 0.946 |
| 100706_f_at | 0.193 | 1.034 | 0.953 | 0.931 | 1.017 |
| 100707_at   | 0.306 | 0.917 | 0.925 | 0.995 | 0.979 |
| 100708_at   | 0.232 | 1.101 | 1.104 | 0.949 | 1.173 |
| 100709_at   | 0.427 | 0.893 | 0.874 | 0.945 | 0.910 |
| 100710_at   | 0.331 | 1.172 | 1.268 | 1.049 | 1.121 |
| 100711_at   | 0.120 | 0.925 | 1.105 | 0.890 | 1.166 |
| 100712_at   | 0.477 | 0.891 | 0.893 | 0.948 | 0.862 |
| 100713_at   | 0.147 | 1.061 | 1.015 | 1.132 | 1.075 |
| 100714_at   | 0.474 | 0.885 | 0.867 | 0.941 | 0.888 |
| 100715_at   | 0.327 | 0.897 | 0.836 | 0.962 | 0.922 |
| 100716_at   | 0.287 | 0.803 | 0.845 | 0.866 | 0.774 |
| 100717_at   | 0.317 | 0.871 | 0.848 | 0.939 | 0.889 |
| 100718_at   | 0.481 | 1.222 | 1.217 | 1.097 | 1.241 |
| 100719_f_at | 0.125 | 0.926 | 0.967 | 0.938 | 0.888 |
| 100720_at   | 0.223 | 1.115 | 1.224 | 1.126 | 1.290 |
| 100721_f_at | 0.086 | 0.932 | 2.595 | 0.811 | 0.940 |
| 100722_r_at | 0.497 | 0.829 | 0.758 | 0.826 | 0.771 |
| 100723_f_at | 0.107 | 0.875 | 1.009 | 0.972 | 0.849 |
| 100724_at   | 0.345 | 0.938 | 0.906 | 0.983 | 0.935 |
| 100725_at   | 0.459 | 0.919 | 0.898 | 0.910 | 0.880 |
| 100726_at   | 0.497 | 0.864 | 0.835 | 0.902 | 0.808 |
| 100727_at   | 0.216 | 1.007 | 1.134 | 1.025 | 1.070 |
| 100728_at   | 0.433 | 0.854 | 0.874 | 0.940 | 0.876 |
| 100729_at   | 0.043 | 1.066 | 1.074 | 0.942 | 1.119 |
| 100730_at   | 0.443 | 0.866 | 0.829 | 0.914 | 0.846 |
| 100731_at   | 0.362 | 0.899 | 0.852 | 0.962 | 0.949 |

|             |       |       |       |       |       |
|-------------|-------|-------|-------|-------|-------|
| 100732_at   | 0.346 | 1.035 | 1.111 | 1.006 | 1.035 |
| 100733_at   | 0.163 | 0.976 | 1.082 | 0.920 | 1.097 |
| 100734_at   | 0.125 | 1.025 | 1.132 | 0.957 | 1.117 |
| 100735_at   | 0.253 | 0.890 | 0.915 | 0.935 | 0.850 |
| 100736_at   | 0.272 | 0.936 | 0.891 | 0.974 | 0.888 |
| 100737_at   | 0.210 | 0.870 | 0.775 | 0.978 | 0.858 |
| 100738_at   | 0.311 | 0.933 | 0.922 | 0.983 | 0.999 |
| 100739_at   | 0.310 | 0.847 | 0.776 | 0.843 | 0.819 |
| 100740_at   | 0.463 | 0.895 | 0.882 | 0.884 | 0.863 |
| 100741_at   | 0.438 | 0.931 | 0.935 | 0.987 | 0.955 |
| 100742_at   | 0.247 | 0.964 | 0.871 | 0.921 | 0.939 |
| 100743_at   | 0.331 | 0.916 | 0.987 | 0.998 | 0.947 |
| 100744_at   | 0.467 | 0.880 | 0.876 | 0.952 | 0.866 |
| 100745_r_at | 0.331 | 1.002 | 0.972 | 0.965 | 0.976 |
| 100746_at   | 0.251 | 0.865 | 0.894 | 0.854 | 0.892 |
| 100747_at   | 0.328 | 0.892 | 0.847 | 0.944 | 0.847 |
| 100748_at   | 0.463 | 0.927 | 0.931 | 0.956 | 0.948 |
| 100749_at   | 0.339 | 0.877 | 0.835 | 0.900 | 0.882 |
| 100750_at   | 0.472 | 0.933 | 0.878 | 0.942 | 0.922 |
| 100751_at   | 0.156 | 0.813 | 0.915 | 0.996 | 1.046 |
| 100752_at   | 0.379 | 0.885 | 0.826 | 0.930 | 0.860 |
| 100753_at   | 0.323 | 1.104 | 1.191 | 1.045 | 1.079 |
| 100754_at   | 0.140 | 0.770 | 0.667 | 0.835 | 0.701 |
| 100755_at   | 0.342 | 0.773 | 0.721 | 0.851 | 0.724 |
| 100756_r_at | 0.280 | 0.870 | 0.838 | 0.965 | 0.886 |
| 100757_at   | 0.312 | 0.831 | 0.786 | 0.891 | 0.842 |
| 100758_at   | 0.174 | 1.016 | 1.045 | 0.917 | 1.059 |
| 100759_at   | 0.390 | 1.030 | 0.987 | 1.050 | 1.089 |
| 100760_at   | 0.502 | 0.937 | 0.910 | 0.939 | 0.923 |
| 100761_at   | 0.305 | 0.963 | 0.972 | 1.022 | 0.991 |
| 100762_at   | 0.308 | 0.837 | 0.824 | 0.939 | 0.851 |
| 100763_at   | 0.394 | 0.929 | 0.940 | 0.928 | 0.950 |
| 100764_at   | 0.497 | 0.833 | 0.825 | 0.881 | 0.828 |
| 100765_at   | 0.436 | 0.888 | 0.855 | 0.947 | 0.852 |
| 100766_at   | 0.375 | 0.907 | 0.895 | 0.967 | 0.886 |
| 100767_at   | 0.311 | 0.911 | 0.885 | 0.894 | 0.828 |
| 100768_at   | 0.359 | 0.838 | 0.809 | 0.843 | 0.856 |
| 100769_at   | 0.309 | 0.820 | 0.786 | 0.855 | 0.856 |
| 100771_at   | 0.035 | 1.047 | 1.347 | 1.019 | 1.116 |
| 100772_g_at | 0.022 | 1.115 | 1.559 | 0.955 | 1.202 |
| 100773_at   | 0.391 | 0.906 | 0.857 | 0.949 | 0.917 |
| 100774_at   | 0.216 | 0.921 | 0.834 | 0.887 | 0.877 |
| 100775_at   | 0.432 | 0.951 | 0.942 | 1.003 | 0.962 |
| 100776_at   | 0.331 | 0.876 | 0.834 | 0.902 | 0.903 |
| 100778_at   | 0.184 | 0.889 | 0.997 | 0.985 | 0.968 |
| 100779_at   | 0.314 | 0.861 | 0.812 | 0.939 | 0.848 |
| 100780_at   | 0.218 | 1.000 | 1.085 | 0.965 | 1.085 |

|             |       |       |       |       |       |
|-------------|-------|-------|-------|-------|-------|
| 100828_at   | 0.161 | 0.957 | 0.755 | 0.949 | 0.923 |
| 100839_at   | 0.434 | 0.935 | 0.902 | 0.990 | 0.886 |
| 100876_at   | 0.187 | 0.884 | 0.847 | 1.027 | 0.899 |
| 100877_at   | 0.319 | 1.171 | 1.159 | 1.037 | 1.192 |
| 100878_at   | 0.352 | 1.275 | 1.274 | 1.021 | 1.317 |
| 100879_at   | 0.369 | 0.818 | 0.770 | 1.062 | 0.823 |
| 100880_at   | 0.436 | 1.063 | 1.024 | 1.002 | 1.092 |
| 100882_at   | 0.295 | 0.930 | 0.846 | 1.000 | 0.876 |
| 100883_at   | 0.406 | 0.835 | 0.811 | 0.921 | 0.837 |
| 100884_at   | 0.379 | 1.170 | 1.156 | 1.078 | 1.211 |
| 100885_at   | 0.362 | 1.140 | 1.199 | 1.080 | 1.176 |
| 100886_f_at | 0.130 | 0.992 | 1.017 | 0.906 | 1.058 |
| 100887_at   | 0.189 | 0.968 | 0.946 | 0.973 | 1.078 |
| 100888_at   | 0.475 | 0.951 | 0.963 | 0.981 | 0.969 |
| 100889_at   | 0.091 | 1.041 | 0.965 | 1.077 | 0.945 |
| 100890_at   | 0.388 | 0.904 | 0.917 | 0.950 | 0.970 |
| 100891_at   | 0.341 | 0.868 | 0.875 | 0.921 | 0.865 |
| 100892_at   | 0.490 | 1.004 | 0.989 | 1.014 | 0.996 |
| 100893_at   | 0.096 | 1.018 | 1.088 | 0.943 | 1.145 |
| 100894_at   | 0.126 | 1.121 | 1.064 | 0.957 | 1.136 |
| 100895_at   | 0.454 | 0.933 | 0.919 | 0.960 | 0.961 |
| 100896_at   | 0.270 | 0.846 | 0.809 | 0.986 | 0.858 |
| 100897_f_at | 0.328 | 0.972 | 0.889 | 0.923 | 0.933 |
| 100898_r_at | 0.403 | 0.781 | 0.798 | 0.792 | 0.714 |
| 100899_s_at | 0.328 | 1.160 | 1.150 | 1.011 | 1.134 |
| 100900_at   | 0.291 | 1.214 | 1.120 | 1.111 | 1.117 |
| 100901_at   | 0.125 | 0.797 | 0.782 | 0.939 | 0.809 |
| 100902_at   | 0.244 | 1.069 | 0.963 | 1.013 | 1.048 |
| 100903_at   | 0.353 | 1.211 | 1.184 | 1.054 | 1.218 |
| 100904_at   | 0.170 | 0.938 | 0.882 | 0.979 | 0.925 |
| 100905_at   | 0.230 | 1.192 | 1.089 | 1.023 | 1.225 |
| 100906_at   | 0.287 | 0.941 | 1.034 | 0.943 | 0.980 |
| 100907_at   | 0.419 | 0.784 | 0.806 | 0.860 | 0.816 |
| 100908_at   | 0.305 | 1.187 | 1.100 | 1.090 | 1.122 |
| 100909_at   | 0.244 | 0.914 | 0.877 | 0.998 | 0.908 |
| 100910_at   | 0.334 | 0.832 | 0.774 | 0.815 | 0.733 |
| 100911_at   | 0.188 | 0.992 | 1.044 | 1.006 | 1.070 |
| 100912_at   | 0.486 | 0.998 | 1.004 | 1.018 | 0.957 |
| 100913_at   | 0.390 | 0.847 | 0.830 | 0.934 | 0.872 |
| 100914_at   | 0.305 | 0.895 | 0.870 | 0.925 | 1.032 |
| 100915_at   | 0.212 | 1.060 | 0.980 | 1.184 | 0.967 |
| 100916_at   | 0.237 | 0.828 | 0.722 | 0.857 | 0.854 |
| 100917_at   | 0.245 | 0.903 | 0.947 | 0.984 | 0.972 |
| 100920_at   | 0.173 | 0.800 | 0.885 | 0.811 | 0.990 |
| 100921_at   | 0.428 | 0.748 | 0.622 | 0.861 | 0.697 |
| 100923_at   | 0.215 | 1.251 | 1.208 | 1.023 | 1.413 |
| 100924_at   | 0.261 | 1.109 | 1.194 | 1.094 | 1.054 |

|             |       |       |       |       |       |
|-------------|-------|-------|-------|-------|-------|
| 100925_at   | 0.325 | 1.061 | 1.146 | 1.029 | 1.296 |
| 100926_at   | 0.502 | 0.828 | 0.809 | 0.849 | 0.820 |
| 100927_at   | 0.081 | 1.269 | 1.218 | 1.251 | 1.142 |
| 100928_at   | 0.110 | 0.942 | 0.768 | 1.113 | 0.931 |
| 100929_at   | 0.375 | 1.395 | 1.232 | 1.201 | 1.387 |
| 100931_at   | 0.459 | 1.174 | 1.293 | 1.165 | 1.259 |
| 100932_at   | 0.203 | 1.015 | 1.030 | 1.107 | 0.969 |
| 100933_at   | 0.417 | 0.920 | 0.909 | 0.964 | 0.925 |
| 100935_at   | 0.219 | 0.972 | 0.935 | 1.025 | 0.980 |
| 100938_at   | 0.237 | 0.833 | 0.814 | 0.924 | 0.832 |
| 100939_at   | 0.441 | 0.947 | 0.932 | 0.945 | 0.913 |
| 100941_at   | 0.228 | 1.112 | 1.180 | 1.194 | 1.227 |
| 100943_at   | 0.438 | 1.124 | 1.154 | 1.014 | 1.140 |
| 100944_at   | 0.189 | 1.019 | 1.205 | 0.851 | 1.108 |
| 100946_at   | 0.427 | 0.866 | 0.752 | 0.961 | 0.664 |
| 100947_at   | 0.179 | 0.873 | 0.870 | 0.873 | 0.954 |
| 100948_at   | 0.107 | 1.025 | 0.928 | 1.120 | 0.948 |
| 100949_at   | 0.307 | 0.901 | 0.910 | 0.974 | 0.924 |
| 100951_at   | 0.200 | 1.265 | 1.158 | 1.243 | 1.143 |
| 100952_at   | 0.079 | 1.232 | 1.096 | 1.188 | 1.033 |
| 100953_at   | 0.278 | 0.934 | 0.915 | 0.914 | 0.981 |
| 100954_at   | 0.343 | 1.037 | 1.047 | 0.968 | 1.183 |
| 100955_at   | 0.279 | 1.010 | 1.044 | 1.049 | 1.265 |
| 100956_at   | 0.481 | 1.010 | 1.037 | 1.024 | 0.992 |
| 100957_at   | 0.368 | 1.178 | 1.153 | 1.014 | 1.180 |
| 100958_at   | 0.200 | 1.254 | 1.218 | 1.042 | 1.136 |
| 100959_at   | 0.093 | 1.161 | 1.313 | 1.066 | 1.156 |
| 100960_g_at | 0.143 | 1.039 | 1.128 | 0.974 | 1.150 |
| 100961_at   | 0.325 | 0.924 | 0.866 | 0.976 | 0.875 |
| 100962_at   | 0.440 | 1.007 | 0.981 | 1.016 | 0.980 |
| 100963_at   | 0.304 | 0.893 | 0.915 | 0.929 | 0.976 |
| 100964_at   | 0.079 | 1.319 | 1.196 | 1.001 | 1.261 |
| 100965_at   | 0.303 | 0.881 | 0.867 | 0.951 | 0.917 |
| 100966_at   | 0.375 | 0.948 | 0.878 | 0.937 | 0.896 |
| 100967_at   | 0.155 | 0.907 | 0.830 | 1.103 | 0.881 |
| 100968_at   | 0.309 | 1.101 | 1.118 | 0.988 | 1.056 |
| 100970_at   | 0.215 | 1.123 | 1.175 | 1.060 | 1.055 |
| 100971_at   | 0.475 | 0.870 | 0.854 | 0.927 | 0.844 |
| 100972_s_at | 0.200 | 0.836 | 0.760 | 0.849 | 0.840 |
| 100973_i_at | 0.276 | 0.926 | 0.870 | 0.969 | 0.919 |
| 100974_at   | 0.094 | 0.976 | 1.054 | 1.097 | 0.969 |
| 100975_f_at | 0.468 | 0.912 | 0.890 | 0.958 | 0.873 |
| 100976_at   | 0.291 | 1.061 | 1.060 | 1.092 | 1.016 |
| 100977_at   | 0.282 | 0.964 | 0.979 | 0.990 | 1.045 |
| 100978_at   | 0.383 | 1.052 | 1.090 | 1.008 | 1.050 |
| 100979_at   | 0.383 | 1.061 | 1.052 | 0.879 | 1.139 |
| 100980_at   | 0.193 | 1.057 | 1.095 | 0.973 | 1.069 |

|             |       |       |        |       |       |
|-------------|-------|-------|--------|-------|-------|
| 100981_at   | 0.320 | 1.419 | 1.157  | 1.090 | 1.104 |
| 100982_at   | 0.330 | 0.933 | 0.867  | 0.945 | 0.917 |
| 100983_at   | 0.318 | 1.171 | 1.158  | 1.060 | 1.191 |
| 100984_at   | 0.246 | 1.301 | 1.360  | 1.038 | 1.282 |
| 100985_at   | 0.103 | 1.024 | 0.927  | 1.007 | 1.063 |
| 100986_at   | 0.173 | 0.882 | 0.911  | 0.949 | 0.822 |
| 100987_f_at | 0.468 | 0.939 | 0.918  | 0.971 | 0.909 |
| 100988_at   | 0.440 | 1.041 | 1.079  | 0.967 | 1.044 |
| 100989_at   | 0.322 | 1.027 | 1.026  | 0.991 | 0.971 |
| 100990_g_at | 0.292 | 1.040 | 1.135  | 1.001 | 1.168 |
| 100991_at   | 0.355 | 0.845 | 0.840  | 0.895 | 0.895 |
| 100992_at   | 0.291 | 0.960 | 0.948  | 1.013 | 0.918 |
| 100994_at   | 0.367 | 0.975 | 0.901  | 0.979 | 0.967 |
| 100995_at   | 0.390 | 0.947 | 0.990  | 0.984 | 0.960 |
| 100996_at   | 0.303 | 0.901 | 0.903  | 0.885 | 0.916 |
| 100997_at   | 0.306 | 0.962 | 0.916  | 1.052 | 0.866 |
| 100998_at   | 0.050 | 1.106 | 1.393  | 0.890 | 1.184 |
| 101000_at   | 0.312 | 1.307 | 1.333  | 1.126 | 1.417 |
| 101001_at   | 0.197 | 1.266 | 1.244  | 1.053 | 1.279 |
| 101002_at   | 0.308 | 1.278 | 1.185  | 1.129 | 1.195 |
| 101003_at   | 0.448 | 1.082 | 1.053  | 1.023 | 1.046 |
| 101004_f_at | 0.294 | 1.175 | 1.175  | 1.039 | 1.173 |
| 101006_at   | 0.458 | 0.868 | 0.879  | 0.957 | 0.822 |
| 101007_at   | 0.053 | 1.099 | 1.053  | 1.178 | 0.922 |
| 101008_at   | 0.369 | 1.242 | 1.221  | 1.131 | 1.200 |
| 101009_at   | 0.163 | 1.080 | 1.053  | 1.035 | 0.970 |
| 101010_at   | 0.309 | 0.857 | 0.812  | 0.943 | 0.830 |
| 101011_at   | 0.369 | 1.157 | 1.153  | 1.022 | 1.171 |
| 101013_at   | 0.293 | 1.012 | 1.025  | 0.968 | 1.073 |
| 101014_at   | 0.375 | 1.088 | 1.110  | 0.961 | 1.105 |
| 101015_s_at | 0.346 | 1.121 | 1.216  | 1.107 | 1.151 |
| 101016_at   | 0.412 | 1.015 | 1.077  | 1.004 | 1.054 |
| 101017_at   | 0.323 | 0.977 | 1.040  | 0.973 | 1.026 |
| 101019_at   | 0.282 | 1.118 | 1.362  | 1.085 | 1.331 |
| 101020_at   | 0.277 | 0.995 | 0.997  | 0.962 | 1.054 |
| 101022_at   | 0.459 | 0.880 | 0.864  | 0.937 | 0.888 |
| 101023_f_at | 0.239 | 1.031 | 0.996  | 0.985 | 0.961 |
| 101024_i_at | 0.020 | 0.817 | 10.332 | 1.288 | 0.964 |
| 101025_f_at | 0.039 | 0.832 | 1.920  | 0.988 | 0.815 |
| 101026_at   | 0.483 | 0.909 | 0.891  | 0.927 | 0.897 |
| 101027_s_at | 0.223 | 0.943 | 0.973  | 0.974 | 1.067 |
| 101028_i_at | 0.334 | 0.775 | 0.860  | 0.938 | 0.696 |
| 101029_f_at | 0.283 | 0.938 | 1.017  | 1.191 | 0.902 |
| 101030_at   | 0.145 | 1.173 | 1.106  | 1.208 | 1.086 |
| 101031_at   | 0.301 | 1.046 | 1.025  | 0.980 | 1.054 |
| 101033_at   | 0.509 | 0.814 | 0.780  | 0.854 | 0.773 |
| 101034_at   | 0.423 | 1.004 | 1.068  | 1.010 | 1.044 |



|             |       |       |       |       |       |
|-------------|-------|-------|-------|-------|-------|
| 101035_at   | 0.406 | 1.142 | 1.134 | 1.048 | 1.137 |
| 101036_at   | 0.320 | 0.924 | 0.980 | 0.971 | 1.002 |
| 101037_at   | 0.290 | 0.940 | 0.867 | 0.982 | 0.938 |
| 101039_at   | 0.240 | 1.064 | 0.942 | 1.098 | 1.013 |
| 101040_at   | 0.382 | 1.059 | 1.005 | 1.053 | 1.054 |
| 101041_at   | 0.424 | 0.900 | 0.817 | 0.929 | 0.834 |
| 101042_f_at | 0.463 | 1.268 | 1.334 | 1.089 | 1.344 |
| 101043_f_at | 0.475 | 0.734 | 0.707 | 0.779 | 0.746 |
| 101044_at   | 0.179 | 1.278 | 1.128 | 1.081 | 1.117 |
| 101045_at   | 0.117 | 0.921 | 1.029 | 0.963 | 1.032 |
| 101046_at   | 0.401 | 0.889 | 0.846 | 0.942 | 0.888 |
| 101047_at   | 0.461 | 1.360 | 1.370 | 1.296 | 1.321 |
| 101048_at   | 0.171 | 1.126 | 1.364 | 0.930 | 1.323 |
| 101049_at   | 0.360 | 0.819 | 0.786 | 0.917 | 0.846 |
| 101050_at   | 0.427 | 1.042 | 1.121 | 1.066 | 1.082 |
| 101051_at   | 0.189 | 0.921 | 0.873 | 0.983 | 0.923 |
| 101052_g_at | 0.337 | 0.910 | 0.839 | 0.873 | 0.890 |
| 101053_at   | 0.228 | 1.169 | 1.118 | 1.057 | 1.096 |
| 101054_at   | 0.162 | 1.127 | 1.326 | 1.061 | 1.094 |
| 101055_at   | 0.075 | 1.211 | 1.477 | 1.094 | 1.312 |
| 101056_at   | 0.281 | 1.292 | 1.161 | 1.087 | 1.205 |
| 101057_at   | 0.296 | 0.989 | 1.018 | 0.946 | 1.033 |
| 101058_at   | 0.303 | 0.984 | 0.939 | 1.425 | 0.912 |
| 101059_at   | 0.216 | 1.111 | 0.984 | 0.991 | 1.115 |
| 101060_at   | 0.246 | 1.149 | 1.586 | 1.241 | 1.067 |
| 101061_at   | 0.051 | 1.042 | 1.172 | 0.906 | 1.024 |
| 101062_at   | 0.076 | 1.026 | 1.035 | 1.014 | 1.098 |
| 101063_at   | 0.449 | 0.784 | 0.653 | 0.843 | 0.768 |
| 101064_at   | 0.256 | 1.175 | 1.138 | 0.996 | 1.209 |
| 101065_at   | 0.082 | 1.094 | 1.285 | 0.976 | 1.254 |
| 101067_at   | 0.438 | 1.202 | 1.216 | 1.082 | 1.213 |
| 101068_at   | 0.222 | 0.903 | 0.940 | 1.020 | 0.993 |
| 101069_g_at | 0.248 | 1.005 | 1.233 | 1.029 | 1.213 |
| 101070_at   | 0.380 | 1.262 | 1.248 | 1.112 | 1.208 |
| 101071_at   | 0.386 | 0.847 | 0.588 | 0.757 | 0.719 |
| 101072_at   | 0.051 | 1.208 | 1.120 | 1.187 | 0.953 |
| 101073_at   | 0.308 | 1.124 | 0.971 | 1.095 | 0.986 |
| 101074_at   | 0.079 | 1.212 | 1.311 | 1.089 | 1.107 |
| 101075_f_at | 0.058 | 0.969 | 3.787 | 1.238 | 1.412 |
| 101076_r_at | 0.505 | 0.800 | 0.760 | 0.822 | 0.747 |
| 101077_at   | 0.443 | 1.012 | 1.085 | 1.102 | 1.037 |
| 101078_at   | 0.274 | 1.162 | 1.143 | 1.100 | 1.141 |
| 101079_at   | 0.341 | 1.248 | 1.152 | 1.049 | 1.096 |
| 101080_at   | 0.236 | 0.982 | 0.919 | 1.124 | 0.978 |
| 101081_at   | 0.316 | 1.170 | 1.248 | 1.084 | 1.103 |
| 101082_at   | 0.196 | 1.026 | 1.511 | 1.193 | 1.064 |
| 101083_s_at | 0.115 | 0.902 | 0.984 | 0.944 | 0.910 |

|             |       |       |       |       |       |
|-------------|-------|-------|-------|-------|-------|
| 101084_f_at | 0.093 | 1.064 | 1.147 | 0.898 | 1.133 |
| 101085_at   | 0.380 | 0.880 | 0.918 | 0.901 | 0.913 |
| 101086_f_at | 0.050 | 1.298 | 1.205 | 1.069 | 1.197 |
| 101087_r_at | 0.481 | 0.757 | 0.749 | 0.793 | 0.674 |
| 101088_f_at | 0.427 | 1.186 | 1.152 | 1.085 | 1.155 |
| 101089_at   | 0.309 | 0.930 | 0.900 | 1.150 | 0.920 |
| 101090_at   | 0.483 | 1.140 | 1.227 | 1.097 | 1.268 |
| 101091_at   | 0.331 | 1.130 | 1.197 | 1.026 | 1.129 |
| 101093_at   | 0.257 | 1.235 | 1.049 | 1.064 | 1.064 |
| 101094_at   | 0.468 | 1.005 | 0.943 | 0.977 | 0.981 |
| 101095_at   | 0.274 | 1.013 | 0.920 | 1.023 | 1.055 |
| 101096_s_at | 0.440 | 0.927 | 0.925 | 0.919 | 0.957 |
| 101097_at   | 0.510 | 1.006 | 1.000 | 1.000 | 1.007 |
| 101099_at   | 0.377 | 1.003 | 0.944 | 0.957 | 0.984 |
| 101101_at   | 0.368 | 1.244 | 1.180 | 1.091 | 1.197 |
| 101102_at   | 0.068 | 1.130 | 1.161 | 0.971 | 1.214 |
| 101103_at   | 0.348 | 0.898 | 0.886 | 0.984 | 0.913 |
| 101104_at   | 0.409 | 1.186 | 1.163 | 1.060 | 1.208 |
| 101105_at   | 0.257 | 0.997 | 1.134 | 0.994 | 1.081 |
| 101106_at   | 0.379 | 1.299 | 1.289 | 1.109 | 1.325 |
| 101107_at   | 0.461 | 1.186 | 1.197 | 1.080 | 1.210 |
| 101108_at   | 0.350 | 1.017 | 1.021 | 0.956 | 1.013 |
| 101109_at   | 0.187 | 1.167 | 0.949 | 1.163 | 1.048 |
| 101110_at   | 0.378 | 1.142 | 1.095 | 1.138 | 1.133 |
| 101111_at   | 0.378 | 0.869 | 0.838 | 0.976 | 0.872 |
| 101112_g_at | 0.264 | 1.012 | 1.083 | 1.004 | 1.140 |
| 101113_at   | 0.484 | 1.054 | 1.042 | 0.998 | 1.038 |
| 101114_at   | 0.480 | 0.997 | 0.987 | 1.019 | 0.995 |
| 101115_at   | 0.212 | 0.642 | 0.395 | 0.949 | 0.312 |
| 101116_at   | 0.463 | 0.871 | 0.882 | 0.896 | 0.874 |
| 101117_at   | 0.174 | 1.015 | 0.902 | 1.030 | 0.989 |
| 101118_at   | 0.505 | 0.975 | 0.969 | 1.003 | 0.968 |
| 101119_at   | 0.434 | 0.944 | 0.975 | 0.962 | 0.960 |
| 101120_at   | 0.334 | 0.836 | 0.815 | 0.900 | 0.874 |
| 101121_at   | 0.287 | 0.830 | 0.848 | 0.945 | 0.908 |
| 101122_at   | 0.255 | 0.922 | 0.866 | 0.941 | 0.948 |
| 101123_at   | 0.261 | 1.071 | 1.009 | 0.965 | 1.056 |
| 101124_at   | 0.497 | 0.784 | 0.799 | 0.823 | 0.789 |
| 101125_at   | 0.168 | 0.960 | 0.930 | 0.994 | 0.998 |
| 101126_r_at | 0.465 | 0.937 | 0.893 | 0.953 | 0.902 |
| 101127_at   | 0.463 | 0.816 | 0.796 | 0.815 | 0.785 |
| 101128_at   | 0.337 | 0.998 | 0.914 | 1.013 | 0.924 |
| 101129_at   | 0.375 | 1.047 | 1.035 | 0.968 | 1.056 |
| 101130_at   | 0.176 | 1.094 | 1.249 | 1.227 | 1.141 |
| 101131_at   | 0.424 | 0.886 | 0.853 | 0.929 | 0.854 |
| 101132_at   | 0.318 | 1.063 | 1.189 | 0.990 | 1.315 |
| 101133_at   | 0.468 | 0.904 | 0.859 | 0.914 | 0.859 |

|             |       |       |       |       |       |
|-------------|-------|-------|-------|-------|-------|
| 101134_at   | 0.443 | 0.967 | 0.950 | 1.019 | 0.972 |
| 101135_at   | 0.443 | 1.035 | 1.022 | 1.007 | 1.007 |
| 101136_at   | 0.440 | 0.880 | 0.863 | 0.936 | 0.871 |
| 101137_at   | 0.069 | 0.969 | 1.049 | 0.898 | 1.057 |
| 101138_at   | 0.425 | 0.864 | 0.810 | 0.896 | 0.887 |
| 101139_r_at | 0.235 | 0.845 | 0.751 | 0.947 | 0.877 |
| 101140_at   | 0.328 | 0.886 | 0.832 | 0.930 | 0.845 |
| 101141_at   | 0.449 | 0.868 | 0.828 | 0.903 | 0.816 |
| 101142_at   | 0.417 | 0.897 | 0.867 | 0.912 | 0.937 |
| 101143_at   | 0.350 | 0.876 | 0.872 | 0.965 | 0.856 |
| 101144_at   | 0.261 | 1.341 | 1.180 | 1.020 | 1.268 |
| 101145_at   | 0.379 | 0.923 | 0.903 | 1.000 | 0.896 |
| 101146_at   | 0.414 | 0.900 | 0.876 | 0.947 | 0.897 |
| 101147_at   | 0.423 | 0.953 | 0.904 | 0.947 | 0.924 |
| 101148_at   | 0.212 | 0.816 | 0.887 | 0.936 | 1.010 |
| 101149_at   | 0.505 | 0.883 | 0.873 | 0.913 | 0.858 |
| 101150_at   | 0.359 | 0.800 | 0.805 | 0.887 | 0.739 |
| 101151_at   | 0.478 | 0.865 | 0.820 | 0.870 | 0.833 |
| 101152_at   | 0.325 | 0.834 | 0.765 | 0.880 | 0.828 |
| 101153_at   | 0.505 | 0.968 | 0.967 | 0.990 | 0.958 |
| 101154_at   | 0.505 | 0.982 | 0.979 | 0.985 | 0.973 |
| 101155_at   | 0.419 | 0.913 | 0.912 | 0.936 | 0.893 |
| 101156_at   | 0.214 | 0.929 | 0.854 | 0.983 | 0.871 |
| 101157_at   | 0.408 | 0.895 | 0.872 | 0.943 | 0.896 |
| 101158_at   | 0.331 | 0.952 | 1.024 | 0.964 | 0.950 |
| 101159_at   | 0.244 | 0.937 | 0.880 | 0.928 | 0.963 |
| 101160_at   | 0.465 | 0.988 | 0.984 | 0.984 | 0.952 |
| 101161_at   | 0.245 | 0.805 | 0.804 | 0.910 | 0.799 |
| 101162_at   | 0.497 | 0.899 | 0.902 | 0.911 | 0.901 |
| 101163_at   | 0.441 | 0.877 | 0.833 | 0.906 | 0.884 |
| 101164_at   | 0.477 | 0.870 | 0.864 | 0.910 | 0.862 |
| 101165_at   | 0.323 | 0.849 | 0.820 | 0.916 | 0.836 |
| 101166_at   | 0.341 | 0.938 | 0.860 | 0.958 | 0.925 |
| 101167_at   | 0.332 | 0.996 | 1.005 | 1.055 | 0.950 |
| 101168_at   | 0.497 | 0.905 | 0.880 | 0.895 | 0.894 |
| 101169_at   | 0.505 | 0.841 | 0.811 | 0.892 | 0.809 |
| 101170_at   | 0.426 | 0.913 | 0.847 | 0.941 | 0.890 |
| 101171_at   | 0.192 | 0.843 | 0.811 | 0.954 | 0.842 |
| 101172_at   | 0.363 | 0.894 | 0.855 | 0.951 | 0.881 |
| 101173_at   | 0.443 | 0.911 | 0.912 | 0.945 | 0.942 |
| 101174_at   | 0.318 | 0.878 | 0.861 | 0.984 | 0.854 |
| 101175_at   | 0.314 | 0.967 | 0.887 | 0.978 | 0.937 |
| 101176_at   | 0.376 | 0.889 | 0.843 | 0.942 | 0.875 |
| 101177_at   | 0.298 | 0.869 | 0.792 | 0.927 | 0.888 |
| 101178_at   | 0.243 | 0.795 | 0.805 | 0.977 | 1.161 |
| 101179_at   | 0.415 | 0.943 | 0.851 | 0.929 | 0.983 |
| 101180_at   | 0.313 | 1.054 | 1.028 | 1.089 | 1.082 |

|             |       |       |       |       |       |
|-------------|-------|-------|-------|-------|-------|
| 101181_at   | 0.320 | 0.935 | 0.926 | 0.975 | 0.934 |
| 101182_at   | 0.492 | 0.926 | 0.940 | 0.952 | 0.931 |
| 101183_at   | 0.306 | 0.956 | 0.903 | 0.971 | 0.933 |
| 101184_at   | 0.444 | 0.896 | 0.850 | 0.923 | 0.888 |
| 101185_at   | 0.265 | 0.878 | 0.833 | 0.966 | 0.883 |
| 101186_at   | 0.391 | 0.963 | 0.958 | 0.996 | 0.914 |
| 101187_at   | 0.335 | 0.902 | 0.919 | 0.996 | 0.932 |
| 101188_at   | 0.400 | 0.871 | 0.871 | 0.917 | 0.883 |
| 101189_at   | 0.459 | 0.779 | 0.796 | 0.833 | 0.784 |
| 101190_at   | 0.496 | 0.954 | 0.949 | 0.994 | 0.945 |
| 101191_at   | 0.344 | 0.868 | 0.858 | 0.935 | 0.865 |
| 101192_at   | 0.477 | 0.958 | 0.962 | 1.013 | 0.972 |
| 101193_at   | 0.351 | 0.987 | 0.998 | 1.028 | 1.039 |
| 101194_at   | 0.224 | 0.908 | 0.929 | 1.027 | 0.960 |
| 101195_at   | 0.400 | 0.946 | 0.874 | 0.993 | 0.893 |
| 101196_at   | 0.160 | 0.857 | 0.826 | 0.987 | 0.894 |
| 101197_at   | 0.379 | 0.837 | 0.746 | 0.873 | 0.809 |
| 101198_at   | 0.402 | 0.832 | 0.793 | 0.903 | 0.806 |
| 101199_at   | 0.163 | 0.843 | 0.798 | 0.960 | 0.805 |
| 101200_at   | 0.497 | 0.981 | 0.952 | 0.983 | 0.953 |
| 101201_r_at | 0.240 | 0.911 | 0.972 | 0.934 | 0.945 |
| 101202_at   | 0.377 | 0.915 | 0.844 | 0.910 | 0.944 |
| 101203_r_at | 0.119 | 0.869 | 0.947 | 0.918 | 0.926 |
| 101204_at   | 0.449 | 0.814 | 0.845 | 0.884 | 0.818 |
| 101205_at   | 0.306 | 0.996 | 0.919 | 0.944 | 0.943 |
| 101206_at   | 0.251 | 0.880 | 0.822 | 0.901 | 0.883 |
| 101207_at   | 0.230 | 0.985 | 1.044 | 0.970 | 1.010 |
| 101208_at   | 0.303 | 0.901 | 0.898 | 1.005 | 0.925 |
| 101209_at   | 0.284 | 0.973 | 0.909 | 0.951 | 0.970 |
| 101210_at   | 0.459 | 0.935 | 0.925 | 0.961 | 0.890 |
| 101211_at   | 0.463 | 0.945 | 0.935 | 0.960 | 0.970 |
| 101212_at   | 0.053 | 0.918 | 1.025 | 0.857 | 1.077 |
| 101213_at   | 0.094 | 1.017 | 1.158 | 0.984 | 1.143 |
| 101214_f_at | 0.261 | 0.997 | 1.127 | 1.147 | 1.004 |
| 101215_at   | 0.495 | 0.886 | 0.870 | 0.926 | 0.873 |
| 101216_at   | 0.417 | 0.802 | 0.788 | 0.881 | 0.797 |
| 101217_at   | 0.330 | 0.884 | 0.904 | 0.949 | 0.942 |
| 101218_at   | 0.321 | 0.863 | 0.801 | 0.906 | 0.825 |
| 101219_at   | 0.296 | 0.833 | 0.805 | 0.911 | 0.829 |
| 101220_at   | 0.388 | 0.867 | 0.797 | 0.853 | 0.858 |
| 101221_at   | 0.336 | 0.960 | 1.042 | 0.987 | 1.022 |
| 101222_f_at | 0.148 | 0.867 | 0.829 | 0.954 | 0.867 |
| 101223_r_at | 0.461 | 0.953 | 0.962 | 0.948 | 0.956 |
| 101224_at   | 0.329 | 0.848 | 0.773 | 0.885 | 0.795 |
| 101225_at   | 0.429 | 0.870 | 0.874 | 0.942 | 0.911 |
| 101226_at   | 0.429 | 0.917 | 0.876 | 0.964 | 0.930 |
| 101227_at   | 0.232 | 0.945 | 0.953 | 1.023 | 0.947 |

|             |       |       |       |       |       |
|-------------|-------|-------|-------|-------|-------|
| 101228_at   | 0.181 | 0.851 | 0.854 | 0.902 | 0.941 |
| 101229_at   | 0.301 | 0.888 | 0.838 | 0.910 | 0.965 |
| 101230_at   | 0.434 | 0.881 | 0.914 | 0.932 | 0.900 |
| 101231_at   | 0.372 | 1.012 | 0.928 | 0.988 | 0.954 |
| 101232_at   | 0.318 | 0.938 | 0.908 | 0.956 | 0.948 |
| 101233_at   | 0.444 | 0.904 | 0.885 | 0.886 | 0.890 |
| 101234_at   | 0.312 | 0.913 | 0.943 | 0.919 | 0.934 |
| 101235_f_at | 0.505 | 0.837 | 0.829 | 0.858 | 0.809 |
| 101254_at   | 0.136 | 1.139 | 1.275 | 1.021 | 1.129 |
| 101255_at   | 0.283 | 1.114 | 1.092 | 1.061 | 1.145 |
| 101276_at   | 0.314 | 0.894 | 0.956 | 0.938 | 0.939 |
| 101277_at   | 0.434 | 0.831 | 0.807 | 0.882 | 0.799 |
| 101278_at   | 0.465 | 0.814 | 0.772 | 0.867 | 0.801 |
| 101279_f_at | 0.322 | 0.834 | 0.799 | 0.915 | 0.836 |
| 101280_at   | 0.467 | 0.923 | 0.907 | 0.969 | 0.939 |
| 101281_at   | 0.332 | 0.930 | 0.846 | 0.946 | 0.865 |
| 101282_at   | 0.371 | 0.848 | 0.828 | 0.937 | 0.851 |
| 101286_at   | 0.419 | 0.883 | 0.840 | 0.924 | 0.894 |
| 101287_s_at | 0.404 | 0.825 | 0.829 | 0.905 | 0.773 |
| 101288_at   | 0.495 | 0.900 | 0.842 | 0.907 | 0.853 |
| 101289_f_at | 0.240 | 0.900 | 0.954 | 0.930 | 0.894 |
| 101290_at   | 0.377 | 0.841 | 0.799 | 0.914 | 0.794 |
| 101291_at   | 0.403 | 0.894 | 0.854 | 0.925 | 0.887 |
| 101292_f_at | 0.350 | 0.870 | 0.891 | 0.919 | 0.872 |
| 101293_at   | 0.334 | 0.868 | 0.887 | 0.928 | 0.898 |
| 101294_g_at | 0.246 | 0.883 | 1.055 | 1.202 | 1.083 |
| 101295_s_at | 0.290 | 0.864 | 0.859 | 0.920 | 0.924 |
| 101296_at   | 0.244 | 1.015 | 0.983 | 0.979 | 0.997 |
| 101297_at   | 0.249 | 0.959 | 0.975 | 0.991 | 0.941 |
| 101298_g_at | 0.139 | 0.793 | 1.106 | 0.812 | 1.067 |
| 101299_at   | 0.184 | 0.905 | 0.864 | 1.010 | 0.931 |
| 101300_at   | 0.370 | 0.873 | 0.914 | 0.875 | 0.894 |
| 101301_at   | 0.290 | 0.915 | 0.931 | 1.084 | 0.920 |
| 101302_at   | 0.410 | 0.855 | 0.815 | 0.903 | 0.871 |
| 101303_at   | 0.356 | 0.893 | 0.834 | 0.938 | 0.870 |
| 101305_at   | 0.472 | 0.895 | 0.884 | 0.965 | 0.826 |
| 101306_f_at | 0.318 | 0.933 | 1.040 | 0.980 | 0.956 |
| 101307_at   | 0.027 | 0.798 | 0.724 | 1.032 | 0.715 |
| 101308_at   | 0.219 | 0.786 | 0.806 | 0.934 | 0.775 |
| 101309_at   | 0.434 | 0.913 | 0.873 | 0.961 | 0.932 |
| 101310_at   | 0.165 | 0.834 | 0.843 | 0.948 | 0.885 |
| 101311_at   | 0.496 | 0.823 | 0.802 | 0.854 | 0.774 |
| 101312_at   | 0.445 | 0.871 | 0.814 | 0.862 | 0.837 |
| 101313_r_at | 0.320 | 0.890 | 0.875 | 0.874 | 0.929 |
| 101314_at   | 0.117 | 0.865 | 0.807 | 0.988 | 0.826 |
| 101315_at   | 0.456 | 0.977 | 0.963 | 0.995 | 1.009 |
| 101316_at   | 0.413 | 0.873 | 0.831 | 0.935 | 0.853 |

|             |       |       |       |       |       |
|-------------|-------|-------|-------|-------|-------|
| 101317_f_at | 0.342 | 0.910 | 0.893 | 0.959 | 0.841 |
| 101318_at   | 0.239 | 0.907 | 0.843 | 0.969 | 0.890 |
| 101319_f_at | 0.257 | 0.903 | 1.222 | 0.873 | 0.849 |
| 101320_f_at | 0.135 | 0.870 | 1.409 | 0.856 | 0.854 |
| 101321_r_at | 0.480 | 0.929 | 0.932 | 0.974 | 0.931 |
| 101324_r_at | 0.422 | 0.906 | 0.893 | 0.956 | 0.874 |
| 101325_r_at | 0.250 | 0.949 | 0.876 | 0.989 | 0.990 |
| 101326_at   | 0.287 | 0.879 | 0.949 | 0.946 | 0.943 |
| 101327_at   | 0.244 | 0.755 | 0.920 | 0.860 | 0.922 |
| 101328_at   | 0.258 | 0.886 | 0.839 | 0.937 | 0.879 |
| 101329_f_at | 0.310 | 0.995 | 1.264 | 0.989 | 0.974 |
| 101330_f_at | 0.294 | 0.979 | 1.087 | 1.006 | 0.963 |
| 101331_f_at | 0.076 | 1.165 | 3.092 | 0.825 | 0.971 |
| 101332_at   | 0.499 | 0.880 | 0.859 | 0.893 | 0.875 |
| 101333_at   | 0.428 | 0.915 | 0.950 | 0.962 | 0.969 |
| 101334_at   | 0.505 | 0.867 | 0.849 | 0.877 | 0.863 |
| 101335_at   | 0.408 | 0.812 | 0.819 | 0.896 | 0.835 |
| 101336_at   | 0.411 | 0.870 | 0.793 | 0.880 | 0.836 |
| 101337_at   | 0.480 | 0.897 | 0.892 | 0.933 | 0.889 |
| 101338_f_at | 0.299 | 0.910 | 0.846 | 0.976 | 0.889 |
| 101339_at   | 0.423 | 0.883 | 0.839 | 0.947 | 0.879 |
| 101340_at   | 0.492 | 0.847 | 0.818 | 0.870 | 0.807 |
| 101341_at   | 0.456 | 0.833 | 0.834 | 0.905 | 0.838 |
| 101342_at   | 0.424 | 0.867 | 0.834 | 0.952 | 0.856 |
| 101343_at   | 0.337 | 0.996 | 0.979 | 0.988 | 1.019 |
| 101344_at   | 0.390 | 0.913 | 0.876 | 0.980 | 0.893 |
| 101345_at   | 0.298 | 0.876 | 0.805 | 0.945 | 0.871 |
| 101346_at   | 0.478 | 0.883 | 0.886 | 0.959 | 0.864 |
| 101347_at   | 0.428 | 0.863 | 0.864 | 0.935 | 0.848 |
| 101348_at   | 0.436 | 0.790 | 0.742 | 0.842 | 0.802 |
| 101349_at   | 0.408 | 0.925 | 0.903 | 0.959 | 0.923 |
| 101350_g_at | 0.275 | 0.912 | 0.994 | 0.995 | 0.947 |
| 101351_at   | 0.313 | 0.926 | 0.873 | 0.935 | 0.927 |
| 101352_g_at | 0.238 | 0.862 | 0.822 | 0.945 | 0.861 |
| 101353_at   | 0.399 | 0.990 | 0.992 | 0.969 | 0.977 |
| 101354_at   | 0.421 | 0.851 | 0.825 | 0.906 | 0.876 |
| 101355_at   | 0.286 | 0.887 | 0.888 | 0.971 | 0.935 |
| 101356_at   | 0.280 | 1.057 | 1.014 | 0.946 | 1.004 |
| 101357_at   | 0.147 | 0.945 | 0.874 | 1.012 | 0.849 |
| 101358_at   | 0.328 | 1.117 | 1.062 | 1.053 | 1.033 |
| 101359_at   | 0.270 | 1.152 | 0.946 | 1.052 | 1.077 |
| 101362_at   | 0.115 | 0.857 | 0.892 | 0.955 | 0.876 |
| 101363_at   | 0.505 | 0.866 | 0.854 | 0.898 | 0.859 |
| 101364_at   | 0.380 | 0.881 | 0.789 | 0.892 | 0.828 |
| 101366_f_at | 0.197 | 0.939 | 0.889 | 0.993 | 0.953 |
| 101367_at   | 0.436 | 1.058 | 1.049 | 0.989 | 1.033 |
| 101368_at   | 0.385 | 0.881 | 0.828 | 0.916 | 0.883 |

|             |       |       |       |       |       |
|-------------|-------|-------|-------|-------|-------|
| 101369_at   | 0.411 | 0.976 | 0.914 | 0.975 | 0.903 |
| 101370_at   | 0.508 | 1.099 | 1.125 | 1.076 | 1.113 |
| 101371_at   | 0.070 | 1.067 | 1.112 | 0.984 | 1.128 |
| 101372_at   | 0.236 | 1.052 | 1.092 | 1.016 | 1.050 |
| 101374_at   | 0.223 | 0.870 | 0.828 | 0.954 | 0.933 |
| 101375_at   | 0.308 | 0.881 | 0.840 | 1.006 | 0.880 |
| 101376_at   | 0.331 | 0.946 | 0.883 | 0.958 | 0.928 |
| 101377_at   | 0.309 | 0.929 | 0.851 | 0.913 | 0.924 |
| 101380_at   | 0.153 | 1.019 | 1.019 | 0.994 | 1.067 |
| 101381_at   | 0.081 | 1.043 | 0.978 | 1.046 | 1.106 |
| 101382_at   | 0.250 | 1.110 | 1.066 | 1.061 | 1.037 |
| 101383_at   | 0.339 | 0.847 | 0.773 | 0.920 | 0.806 |
| 101384_at   | 0.444 | 0.880 | 0.872 | 0.938 | 0.833 |
| 101385_at   | 0.438 | 0.973 | 1.000 | 1.000 | 0.978 |
| 101386_at   | 0.357 | 0.883 | 0.864 | 0.958 | 0.920 |
| 101387_at   | 0.497 | 0.973 | 0.967 | 0.993 | 0.951 |
| 101388_at   | 0.499 | 0.861 | 0.855 | 0.894 | 0.851 |
| 101389_at   | 0.174 | 1.217 | 1.231 | 0.984 | 1.303 |
| 101390_at   | 0.483 | 0.851 | 0.840 | 0.913 | 0.854 |
| 101392_at   | 0.500 | 1.100 | 1.100 | 1.063 | 1.129 |
| 101393_at   | 0.409 | 1.142 | 1.169 | 1.034 | 1.198 |
| 101394_at   | 0.319 | 0.989 | 0.931 | 1.044 | 0.974 |
| 101395_at   | 0.441 | 0.937 | 0.928 | 0.994 | 0.873 |
| 101396_at   | 0.149 | 0.971 | 0.911 | 0.960 | 0.886 |
| 101397_at   | 0.124 | 0.919 | 0.881 | 0.993 | 0.920 |
| 101398_at   | 0.050 | 1.142 | 1.189 | 1.020 | 1.211 |
| 101399_at   | 0.282 | 0.868 | 0.840 | 0.957 | 0.834 |
| 101401_at   | 0.272 | 0.913 | 0.977 | 0.940 | 1.014 |
| 101402_at   | 0.201 | 1.014 | 0.931 | 1.018 | 0.959 |
| 101403_at   | 0.406 | 0.998 | 0.980 | 0.958 | 0.960 |
| 101404_at   | 0.458 | 1.013 | 0.998 | 0.980 | 1.052 |
| 101405_at   | 0.164 | 0.914 | 0.900 | 1.013 | 0.889 |
| 101406_at   | 0.251 | 0.901 | 0.844 | 0.947 | 0.908 |
| 101407_at   | 0.480 | 1.041 | 1.028 | 1.046 | 1.059 |
| 101408_at   | 0.267 | 0.933 | 0.942 | 1.011 | 0.934 |
| 101409_at   | 0.325 | 0.940 | 1.001 | 0.945 | 0.994 |
| 101410_at   | 0.207 | 1.035 | 0.911 | 1.140 | 0.960 |
| 101412_at   | 0.310 | 0.872 | 0.816 | 0.896 | 0.852 |
| 101413_at   | 0.507 | 0.808 | 0.768 | 0.835 | 0.745 |
| 101414_at   | 0.443 | 0.860 | 0.868 | 0.888 | 0.879 |
| 101415_i_at | 0.420 | 0.886 | 0.795 | 0.881 | 0.856 |
| 101416_f_at | 0.167 | 1.132 | 1.050 | 0.985 | 1.040 |
| 101417_at   | 0.505 | 0.873 | 0.856 | 0.914 | 0.849 |
| 101419_at   | 0.138 | 0.891 | 0.877 | 0.998 | 0.881 |
| 101420_at   | 0.425 | 0.988 | 0.959 | 1.031 | 0.986 |
| 101421_at   | 0.448 | 1.026 | 1.067 | 1.045 | 1.050 |
| 101422_at   | 0.494 | 1.106 | 1.084 | 1.087 | 1.162 |

|             |       |       |       |       |       |
|-------------|-------|-------|-------|-------|-------|
| 101423_at   | 0.224 | 0.957 | 0.936 | 1.015 | 1.020 |
| 101424_at   | 0.099 | 1.005 | 1.115 | 0.883 | 1.078 |
| 101425_at   | 0.232 | 0.959 | 0.895 | 0.969 | 0.901 |
| 101426_at   | 0.126 | 1.128 | 1.342 | 1.026 | 1.361 |
| 101428_at   | 0.216 | 0.905 | 0.836 | 0.963 | 0.887 |
| 101429_at   | 0.244 | 0.979 | 0.839 | 0.879 | 0.899 |
| 101430_at   | 0.090 | 1.056 | 0.984 | 1.038 | 0.966 |
| 101431_at   | 0.295 | 0.940 | 0.870 | 0.989 | 0.871 |
| 101432_at   | 0.321 | 0.937 | 0.859 | 0.955 | 0.887 |
| 101433_at   | 0.140 | 1.113 | 1.078 | 1.031 | 1.141 |
| 101435_at   | 0.417 | 0.990 | 1.000 | 1.005 | 1.030 |
| 101436_at   | 0.072 | 0.949 | 1.229 | 0.933 | 1.016 |
| 101437_at   | 0.291 | 0.890 | 0.934 | 0.975 | 1.007 |
| 101439_at   | 0.387 | 1.040 | 1.005 | 1.024 | 1.015 |
| 101440_at   | 0.108 | 0.947 | 0.856 | 0.953 | 0.934 |
| 101441_i_at | 0.370 | 1.347 | 1.257 | 1.110 | 1.283 |
| 101442_f_at | 0.326 | 1.001 | 0.915 | 0.991 | 0.935 |
| 101443_at   | 0.301 | 0.894 | 0.828 | 0.957 | 0.914 |
| 101444_at   | 0.445 | 1.015 | 1.040 | 1.009 | 1.028 |
| 101445_at   | 0.344 | 1.075 | 1.051 | 1.034 | 1.002 |
| 101446_at   | 0.399 | 1.001 | 0.961 | 1.077 | 0.994 |
| 101447_at   | 0.261 | 0.912 | 0.914 | 0.999 | 0.997 |
| 101448_at   | 0.106 | 0.992 | 0.998 | 1.009 | 0.930 |
| 101449_at   | 0.488 | 1.148 | 1.127 | 1.113 | 1.192 |
| 101450_at   | 0.332 | 0.963 | 0.914 | 0.947 | 0.907 |
| 101451_at   | 0.243 | 0.834 | 0.853 | 0.911 | 0.986 |
| 101453_at   | 0.290 | 0.976 | 0.904 | 1.026 | 0.950 |
| 101455_at   | 0.392 | 0.924 | 0.873 | 0.976 | 0.915 |
| 101456_at   | 0.318 | 0.850 | 0.869 | 0.948 | 0.909 |
| 101457_at   | 0.288 | 1.045 | 1.150 | 0.981 | 1.076 |
| 101458_at   | 0.402 | 1.198 | 1.116 | 1.160 | 1.141 |
| 101459_at   | 0.203 | 1.196 | 1.311 | 1.029 | 1.332 |
| 101461_f_at | 0.328 | 1.231 | 1.191 | 1.020 | 1.182 |
| 101462_r_at | 0.230 | 0.990 | 0.929 | 0.961 | 1.029 |
| 101463_at   | 0.215 | 0.895 | 0.864 | 0.986 | 0.908 |
| 101464_at   | 0.055 | 0.899 | 1.346 | 0.948 | 1.009 |
| 101465_at   | 0.325 | 1.107 | 1.177 | 0.955 | 1.155 |
| 101466_at   | 0.188 | 1.102 | 1.032 | 1.025 | 1.063 |
| 101467_at   | 0.292 | 0.939 | 0.878 | 0.964 | 0.860 |
| 101468_at   | 0.037 | 1.169 | 1.772 | 1.151 | 1.300 |
| 101469_at   | 0.436 | 1.153 | 1.088 | 1.054 | 1.173 |
| 101470_at   | 0.243 | 1.045 | 0.921 | 0.952 | 0.962 |
| 101471_at   | 0.323 | 0.842 | 0.821 | 0.916 | 0.795 |
| 101472_s_at | 0.328 | 0.835 | 0.769 | 0.850 | 0.822 |
| 101473_at   | 0.328 | 0.858 | 0.852 | 0.995 | 0.866 |
| 101474_at   | 0.484 | 0.873 | 0.811 | 0.897 | 0.811 |
| 101475_at   | 0.264 | 1.167 | 1.126 | 1.002 | 1.089 |



|             |       |       |       |       |       |
|-------------|-------|-------|-------|-------|-------|
| 101476_at   | 0.320 | 1.222 | 1.256 | 1.087 | 1.072 |
| 101480_at   | 0.449 | 0.864 | 0.861 | 0.913 | 0.855 |
| 101481_at   | 0.342 | 1.129 | 1.120 | 1.028 | 1.159 |
| 101482_at   | 0.207 | 1.170 | 1.326 | 1.053 | 1.293 |
| 101483_at   | 0.150 | 1.126 | 1.182 | 1.058 | 1.208 |
| 101484_at   | 0.241 | 1.088 | 1.049 | 0.956 | 1.020 |
| 101485_at   | 0.230 | 0.942 | 1.010 | 0.934 | 1.002 |
| 101486_at   | 0.046 | 1.045 | 1.149 | 0.910 | 1.063 |
| 101487_f_at | 0.280 | 1.235 | 1.119 | 1.149 | 1.125 |
| 101488_r_at | 0.508 | 0.695 | 0.667 | 0.751 | 0.666 |
| 101489_at   | 0.346 | 1.299 | 1.287 | 1.074 | 1.247 |
| 101490_at   | 0.378 | 1.126 | 1.277 | 1.189 | 1.225 |
| 101492_at   | 0.448 | 0.800 | 0.829 | 0.841 | 0.822 |
| 101493_at   | 0.323 | 0.933 | 0.863 | 0.965 | 0.917 |
| 101494_at   | 0.481 | 0.902 | 0.887 | 0.887 | 0.899 |
| 101495_at   | 0.454 | 1.012 | 0.975 | 0.967 | 0.973 |
| 101498_at   | 0.372 | 1.079 | 1.039 | 1.038 | 1.087 |
| 101499_at   | 0.218 | 1.105 | 1.176 | 1.106 | 1.044 |
| 101500_at   | 0.214 | 1.006 | 0.981 | 1.074 | 0.977 |
| 101501_r_at | 0.175 | 1.060 | 0.984 | 1.039 | 0.996 |
| 101502_at   | 0.274 | 1.065 | 0.982 | 0.992 | 1.121 |
| 101503_at   | 0.051 | 0.817 | 0.938 | 1.014 | 0.927 |
| 101505_at   | 0.398 | 1.053 | 1.050 | 1.059 | 1.101 |
| 101506_at   | 0.106 | 1.044 | 1.195 | 0.974 | 1.210 |
| 101507_at   | 0.227 | 1.051 | 1.081 | 1.016 | 0.993 |
| 101508_at   | 0.445 | 0.912 | 0.876 | 0.903 | 0.886 |
| 101509_at   | 0.205 | 1.217 | 1.346 | 1.026 | 1.323 |
| 101510_at   | 0.063 | 1.114 | 1.218 | 0.950 | 1.136 |
| 101511_at   | 0.328 | 0.867 | 0.826 | 0.799 | 0.783 |
| 101513_at   | 0.431 | 0.881 | 0.845 | 0.841 | 0.867 |
| 101514_at   | 0.302 | 0.887 | 0.995 | 0.847 | 1.022 |
| 101515_at   | 0.448 | 1.030 | 1.054 | 1.090 | 1.030 |
| 101516_at   | 0.317 | 1.273 | 1.154 | 1.202 | 1.155 |
| 101517_at   | 0.343 | 1.173 | 1.178 | 1.040 | 1.156 |
| 101518_at   | 0.106 | 0.996 | 1.091 | 0.945 | 1.142 |
| 101519_at   | 0.407 | 1.132 | 1.142 | 1.024 | 1.135 |
| 101520_at   | 0.387 | 1.047 | 0.969 | 1.013 | 1.016 |
| 101521_at   | 0.038 | 1.060 | 1.520 | 1.023 | 1.452 |
| 101522_at   | 0.358 | 0.976 | 0.969 | 1.026 | 1.008 |
| 101523_at   | 0.188 | 1.290 | 1.430 | 1.059 | 1.311 |
| 101524_at   | 0.125 | 0.905 | 0.946 | 1.051 | 1.032 |
| 101525_at   | 0.478 | 1.054 | 1.124 | 1.046 | 1.043 |
| 101526_at   | 0.247 | 0.985 | 0.955 | 1.030 | 1.023 |
| 101527_at   | 0.486 | 1.120 | 1.191 | 1.033 | 1.172 |
| 101528_at   | 0.504 | 1.015 | 1.075 | 1.014 | 1.052 |
| 101529_g_at | 0.399 | 0.934 | 1.060 | 0.990 | 1.007 |
| 101530_at   | 0.227 | 1.054 | 1.128 | 1.006 | 1.123 |

|             |       |       |       |       |       |
|-------------|-------|-------|-------|-------|-------|
| 101531_at   | 0.288 | 0.920 | 0.921 | 0.968 | 0.957 |
| 101532_g_at | 0.212 | 0.996 | 0.971 | 1.062 | 0.971 |
| 101534_at   | 0.509 | 0.845 | 0.822 | 0.879 | 0.813 |
| 101536_at   | 0.128 | 1.077 | 0.973 | 1.042 | 0.873 |
| 101537_at   | 0.318 | 0.949 | 0.890 | 0.977 | 0.862 |
| 101538_i_at | 0.053 | 1.270 | 0.933 | 1.117 | 1.073 |
| 101539_f_at | 0.091 | 1.257 | 1.033 | 1.084 | 1.138 |
| 101540_at   | 0.147 | 1.059 | 1.122 | 0.996 | 1.194 |
| 101541_at   | 0.505 | 0.864 | 0.835 | 0.912 | 0.829 |
| 101542_f_at | 0.186 | 1.172 | 1.321 | 1.065 | 1.330 |
| 101543_f_at | 0.234 | 1.200 | 1.194 | 1.098 | 1.113 |
| 101546_at   | 0.406 | 1.065 | 1.032 | 1.052 | 1.047 |
| 101548_at   | 0.334 | 0.942 | 0.996 | 0.935 | 1.035 |
| 101550_at   | 0.328 | 0.975 | 0.938 | 0.963 | 0.942 |
| 101551_s_at | 0.191 | 1.053 | 1.077 | 0.985 | 1.138 |
| 101552_at   | 0.307 | 0.857 | 0.801 | 0.938 | 0.827 |
| 101553_at   | 0.226 | 0.867 | 0.791 | 0.902 | 0.796 |
| 101554_at   | 0.316 | 0.982 | 1.105 | 0.929 | 0.987 |
| 101555_at   | 0.228 | 1.055 | 1.028 | 1.052 | 1.028 |
| 101557_at   | 0.494 | 0.952 | 0.969 | 0.968 | 0.950 |
| 101558_s_at | 0.306 | 1.294 | 1.582 | 1.075 | 1.515 |
| 101560_at   | 0.107 | 1.052 | 1.157 | 1.014 | 1.104 |
| 101561_at   | 0.233 | 1.176 | 1.506 | 1.297 | 1.203 |
| 101562_at   | 0.155 | 1.116 | 1.150 | 0.962 | 1.180 |
| 101564_at   | 0.103 | 0.884 | 0.923 | 1.028 | 1.032 |
| 101565_f_at | 0.038 | 0.878 | 0.792 | 0.967 | 0.843 |
| 101566_f_at | 0.234 | 0.924 | 0.856 | 1.178 | 0.881 |
| 101567_at   | 0.359 | 0.812 | 0.788 | 0.862 | 0.799 |
| 101568_at   | 0.475 | 0.961 | 0.959 | 0.993 | 0.931 |
| 101569_at   | 0.329 | 0.838 | 0.791 | 0.911 | 0.796 |
| 101570_at   | 0.507 | 0.880 | 0.870 | 0.912 | 0.869 |
| 101571_g_at | 0.260 | 1.090 | 1.194 | 1.160 | 1.062 |
| 101572_f_at | 0.179 | 0.827 | 0.790 | 0.902 | 0.776 |
| 101573_f_at | 0.219 | 1.028 | 1.091 | 0.984 | 1.080 |
| 101574_f_at | 0.090 | 0.862 | 0.773 | 0.916 | 0.800 |
| 101575_i_at | 0.297 | 0.864 | 0.782 | 0.881 | 0.862 |
| 101576_f_at | 0.081 | 0.857 | 0.783 | 0.976 | 0.798 |
| 101577_at   | 0.240 | 1.005 | 1.061 | 0.958 | 1.067 |
| 101578_f_at | 0.270 | 1.031 | 0.658 | 0.806 | 0.622 |
| 101579_at   | 0.061 | 1.102 | 1.159 | 1.016 | 1.079 |
| 101580_at   | 0.454 | 1.063 | 1.123 | 1.067 | 1.035 |
| 101581_at   | 0.297 | 1.031 | 0.983 | 0.942 | 1.006 |
| 101582_at   | 0.417 | 0.962 | 0.943 | 0.926 | 0.925 |
| 101583_at   | 0.365 | 1.106 | 1.123 | 1.039 | 1.067 |
| 101584_at   | 0.268 | 0.979 | 0.992 | 1.051 | 1.008 |
| 101585_at   | 0.375 | 1.154 | 1.059 | 1.066 | 1.096 |
| 101587_at   | 0.114 | 1.208 | 0.994 | 1.083 | 1.051 |

|             |       |       |       |       |       |
|-------------|-------|-------|-------|-------|-------|
| 101588_at   | 0.256 | 1.005 | 1.073 | 1.037 | 0.986 |
| 101589_at   | 0.081 | 1.169 | 1.344 | 1.028 | 1.358 |
| 101590_at   | 0.308 | 1.222 | 1.373 | 1.001 | 1.242 |
| 101591_at   | 0.323 | 1.031 | 1.071 | 0.970 | 1.054 |
| 101593_at   | 0.047 | 1.054 | 0.952 | 0.971 | 0.929 |
| 101595_at   | 0.314 | 0.884 | 0.820 | 0.912 | 0.918 |
| 101596_at   | 0.348 | 0.901 | 0.879 | 0.984 | 0.936 |
| 101597_at   | 0.258 | 0.876 | 0.905 | 1.006 | 0.919 |
| 101598_at   | 0.246 | 0.910 | 0.804 | 0.959 | 0.845 |
| 101599_at   | 0.486 | 0.899 | 0.883 | 0.889 | 0.868 |
| 101600_at   | 0.465 | 0.831 | 0.835 | 0.900 | 0.834 |
| 101601_at   | 0.496 | 0.948 | 0.935 | 0.975 | 0.918 |
| 101602_at   | 0.363 | 0.839 | 0.822 | 0.894 | 0.875 |
| 101603_g_at | 0.219 | 0.844 | 0.785 | 0.888 | 0.860 |
| 101604_at   | 0.365 | 0.969 | 1.010 | 0.999 | 0.962 |
| 101605_at   | 0.287 | 0.870 | 0.900 | 0.911 | 0.912 |
| 101606_at   | 0.445 | 0.925 | 0.886 | 0.952 | 0.930 |
| 101607_at   | 0.291 | 0.976 | 0.863 | 0.972 | 0.958 |
| 101608_at   | 0.505 | 1.013 | 0.992 | 1.027 | 1.004 |
| 101609_at   | 0.305 | 0.908 | 0.841 | 0.949 | 0.870 |
| 101610_at   | 0.467 | 0.901 | 0.896 | 0.954 | 0.913 |
| 101611_at   | 0.427 | 0.874 | 0.833 | 0.918 | 0.882 |
| 101612_at   | 0.166 | 0.933 | 0.891 | 1.020 | 1.004 |
| 101613_at   | 0.504 | 0.817 | 0.791 | 0.827 | 0.781 |
| 101614_at   | 0.386 | 0.922 | 0.916 | 0.979 | 0.944 |
| 101615_at   | 0.270 | 0.934 | 0.942 | 0.984 | 0.999 |
| 101616_at   | 0.285 | 0.855 | 1.114 | 0.908 | 0.883 |
| 101617_s_at | 0.410 | 0.855 | 0.887 | 0.945 | 0.868 |
| 101618_r_at | 0.271 | 0.854 | 0.793 | 0.970 | 0.841 |
| 101619_at   | 0.390 | 0.961 | 0.928 | 1.005 | 0.956 |
| 101620_at   | 0.507 | 0.936 | 0.928 | 0.969 | 0.911 |
| 101621_at   | 0.349 | 0.877 | 0.816 | 0.913 | 0.859 |
| 101622_at   | 0.240 | 0.921 | 0.854 | 0.991 | 0.854 |
| 101623_at   | 0.433 | 0.886 | 0.843 | 0.938 | 0.887 |
| 101624_at   | 0.496 | 0.788 | 0.734 | 0.834 | 0.761 |
| 101625_at   | 0.331 | 0.853 | 0.812 | 0.925 | 0.864 |
| 101626_at   | 0.404 | 0.903 | 0.850 | 0.921 | 0.901 |
| 101627_at   | 0.400 | 0.896 | 0.963 | 0.984 | 0.979 |
| 101628_g_at | 0.340 | 0.932 | 0.942 | 0.990 | 0.965 |
| 101629_s_at | 0.357 | 0.937 | 0.956 | 0.994 | 0.952 |
| 101630_f_at | 0.379 | 0.877 | 0.868 | 0.936 | 0.915 |
| 101631_at   | 0.256 | 1.036 | 0.971 | 0.904 | 1.058 |
| 101632_at   | 0.470 | 0.855 | 0.831 | 0.910 | 0.871 |
| 101633_at   | 0.140 | 0.898 | 1.611 | 0.890 | 0.930 |
| 101634_at   | 0.076 | 1.140 | 1.381 | 0.990 | 1.304 |
| 101635_f_at | 0.161 | 0.911 | 0.856 | 1.026 | 0.896 |
| 101636_at   | 0.443 | 0.838 | 0.837 | 0.868 | 0.843 |

|             |       |       |       |       |       |
|-------------|-------|-------|-------|-------|-------|
| 101637_at   | 0.499 | 0.838 | 0.810 | 0.859 | 0.788 |
| 101638_s_at | 0.278 | 0.975 | 0.894 | 1.089 | 0.919 |
| 101639_r_at | 0.436 | 0.920 | 0.925 | 0.954 | 0.906 |
| 101640_f_at | 0.016 | 1.149 | 3.269 | 0.776 | 1.071 |
| 101641_at   | 0.223 | 0.985 | 1.036 | 0.958 | 0.916 |
| 101642_at   | 0.434 | 0.895 | 0.853 | 0.963 | 0.867 |
| 101643_at   | 0.285 | 0.952 | 0.911 | 1.020 | 0.899 |
| 101644_f_at | 0.415 | 0.866 | 0.844 | 0.898 | 0.883 |
| 101645_f_at | 0.314 | 0.869 | 0.855 | 0.966 | 0.847 |
| 101646_at   | 0.368 | 0.928 | 0.886 | 1.022 | 0.894 |
| 101647_at   | 0.316 | 0.801 | 0.799 | 0.868 | 0.863 |
| 101648_at   | 0.441 | 0.867 | 0.827 | 0.886 | 0.833 |
| 101649_at   | 0.171 | 0.824 | 0.761 | 0.890 | 0.814 |
| 101650_at   | 0.275 | 1.058 | 0.953 | 0.969 | 0.985 |
| 101651_at   | 0.388 | 0.790 | 0.768 | 0.886 | 0.765 |
| 101652_i_at | 0.468 | 0.848 | 0.766 | 0.863 | 0.770 |
| 101653_f_at | 0.236 | 0.867 | 0.951 | 0.886 | 0.934 |
| 101654_at   | 0.388 | 0.938 | 0.846 | 0.914 | 0.832 |
| 101655_at   | 0.117 | 0.964 | 0.980 | 1.061 | 0.984 |
| 101656_f_at | 0.051 | 0.994 | 2.346 | 0.817 | 0.944 |
| 101657_at   | 0.354 | 0.882 | 0.863 | 0.966 | 0.853 |
| 101658_f_at | 0.125 | 0.885 | 1.139 | 0.920 | 1.085 |
| 101659_at   | 0.332 | 0.910 | 0.881 | 0.986 | 0.925 |
| 101660_at   | 0.497 | 0.917 | 0.915 | 0.945 | 0.914 |
| 101661_r_at | 0.216 | 0.985 | 0.927 | 1.003 | 1.030 |
| 101662_at   | 0.452 | 0.879 | 0.851 | 0.937 | 0.880 |
| 101663_s_at | 0.499 | 0.899 | 0.875 | 0.932 | 0.880 |
| 101664_at   | 0.064 | 1.056 | 1.131 | 0.943 | 1.119 |
| 101665_at   | 0.323 | 0.902 | 0.840 | 0.934 | 0.903 |
| 101666_at   | 0.406 | 0.942 | 0.897 | 0.979 | 0.963 |
| 101667_at   | 0.412 | 0.857 | 0.857 | 0.882 | 0.781 |
| 101668_at   | 0.189 | 0.885 | 0.838 | 1.014 | 0.909 |
| 101669_at   | 0.385 | 0.897 | 0.851 | 0.881 | 0.890 |
| 101670_at   | 0.499 | 0.905 | 0.890 | 0.916 | 0.874 |
| 101671_at   | 0.293 | 0.951 | 0.993 | 1.015 | 0.993 |
| 101672_at   | 0.335 | 0.938 | 0.899 | 0.970 | 0.887 |
| 101673_r_at | 0.505 | 0.965 | 0.971 | 0.978 | 0.968 |
| 101674_at   | 0.326 | 0.911 | 0.868 | 1.002 | 0.883 |
| 101675_at   | 0.384 | 0.851 | 0.871 | 0.946 | 0.864 |
| 101676_at   | 0.051 | 0.953 | 0.928 | 1.141 | 0.899 |
| 101677_at   | 0.362 | 0.854 | 0.830 | 0.941 | 0.824 |
| 101678_r_at | 0.390 | 0.862 | 0.847 | 0.938 | 0.874 |
| 101679_at   | 0.225 | 0.874 | 0.802 | 0.932 | 0.858 |
| 101680_at   | 0.204 | 0.974 | 1.089 | 0.933 | 1.037 |
| 101681_f_at | 0.337 | 0.945 | 0.989 | 0.976 | 0.984 |
| 101682_f_at | 0.077 | 0.875 | 0.822 | 0.970 | 0.856 |
| 101683_at   | 0.288 | 0.798 | 0.778 | 0.926 | 0.809 |

|             |       |       |       |       |       |
|-------------|-------|-------|-------|-------|-------|
| 101684_r_at | 0.483 | 0.741 | 0.678 | 0.757 | 0.770 |
| 101685_f_at | 0.303 | 0.838 | 0.823 | 0.933 | 0.821 |
| 101686_at   | 0.452 | 0.921 | 0.927 | 0.953 | 0.963 |
| 101687_r_at | 0.223 | 0.967 | 0.964 | 1.021 | 0.995 |
| 101688_at   | 0.278 | 0.997 | 0.990 | 1.018 | 1.093 |
| 101689_at   | 0.346 | 0.923 | 0.857 | 0.912 | 0.912 |
| 101690_r_at | 0.179 | 0.899 | 0.890 | 0.970 | 0.954 |
| 101691_s_at | 0.383 | 0.935 | 0.830 | 0.926 | 0.873 |
| 101692_r_at | 0.504 | 0.778 | 0.733 | 0.805 | 0.704 |
| 101693_f_at | 0.154 | 0.986 | 0.863 | 0.950 | 1.002 |
| 101694_f_at | 0.499 | 0.876 | 0.837 | 0.871 | 0.854 |
| 101695_at   | 0.349 | 0.843 | 0.775 | 0.879 | 0.865 |
| 101696_r_at | 0.465 | 0.741 | 0.723 | 0.767 | 0.645 |
| 101697_f_at | 0.329 | 1.103 | 1.073 | 1.033 | 1.060 |
| 101698_f_at | 0.443 | 0.877 | 0.835 | 0.905 | 0.895 |
| 101699_at   | 0.363 | 0.944 | 0.893 | 0.916 | 0.926 |
| 101700_at   | 0.321 | 0.904 | 0.866 | 0.983 | 0.900 |
| 101701_at   | 0.440 | 0.936 | 0.923 | 0.950 | 0.939 |
| 101702_at   | 0.459 | 0.855 | 0.877 | 0.898 | 0.854 |
| 101703_at   | 0.448 | 0.929 | 0.910 | 0.945 | 0.940 |
| 101704_at   | 0.389 | 0.924 | 0.866 | 0.934 | 0.909 |
| 101705_at   | 0.396 | 0.784 | 0.763 | 0.837 | 0.797 |
| 101706_at   | 0.480 | 0.769 | 0.785 | 0.805 | 0.736 |
| 101707_at   | 0.379 | 0.965 | 1.006 | 0.914 | 0.995 |
| 101708_at   | 0.117 | 1.002 | 1.123 | 0.937 | 1.141 |
| 101709_at   | 0.419 | 0.913 | 0.959 | 0.924 | 0.915 |
| 101710_at   | 0.481 | 0.816 | 0.763 | 0.833 | 0.788 |
| 101711_at   | 0.510 | 0.998 | 0.984 | 1.008 | 0.985 |
| 101712_at   | 0.465 | 0.855 | 0.804 | 0.881 | 0.841 |
| 101713_at   | 0.323 | 0.910 | 0.893 | 0.953 | 0.907 |
| 101714_at   | 0.377 | 0.893 | 0.865 | 0.956 | 0.884 |
| 101715_at   | 0.475 | 0.959 | 0.902 | 0.967 | 0.935 |
| 101716_at   | 0.159 | 1.010 | 1.158 | 1.008 | 1.060 |
| 101717_at   | 0.490 | 0.871 | 0.854 | 0.927 | 0.871 |
| 101718_f_at | 0.035 | 1.048 | 2.764 | 0.801 | 0.997 |
| 101719_at   | 0.178 | 0.844 | 0.773 | 0.924 | 0.838 |
| 101720_f_at | 0.163 | 1.012 | 1.577 | 0.882 | 0.920 |
| 101723_r_at | 0.470 | 0.827 | 0.825 | 0.854 | 0.756 |
| 101724_at   | 0.458 | 0.897 | 0.883 | 0.938 | 0.926 |
| 101725_at   | 0.219 | 0.883 | 0.866 | 0.984 | 0.891 |
| 101726_at   | 0.321 | 0.994 | 0.938 | 1.049 | 0.965 |
| 101727_at   | 0.440 | 0.829 | 0.850 | 0.888 | 0.843 |
| 101728_at   | 0.232 | 0.831 | 0.915 | 0.896 | 0.929 |
| 101729_at   | 0.392 | 0.823 | 0.775 | 0.903 | 0.797 |
| 101730_at   | 0.475 | 0.885 | 0.876 | 0.941 | 0.894 |
| 101731_at   | 0.233 | 0.880 | 0.800 | 0.933 | 0.811 |
| 101732_at   | 0.355 | 0.791 | 0.712 | 0.815 | 0.854 |

|             |       |       |       |       |       |
|-------------|-------|-------|-------|-------|-------|
| 101733_at   | 0.323 | 0.901 | 0.844 | 0.973 | 0.919 |
| 101734_at   | 0.407 | 0.843 | 0.827 | 0.922 | 0.832 |
| 101735_f_at | 0.347 | 0.841 | 0.850 | 0.888 | 0.915 |
| 101736_at   | 0.324 | 0.867 | 0.845 | 0.917 | 0.852 |
| 101737_at   | 0.363 | 0.911 | 0.857 | 0.937 | 0.880 |
| 101738_at   | 0.133 | 0.935 | 0.864 | 1.000 | 0.873 |
| 101739_at   | 0.484 | 0.840 | 0.771 | 0.866 | 0.793 |
| 101740_at   | 0.428 | 0.939 | 0.883 | 0.940 | 0.909 |
| 101741_at   | 0.412 | 0.987 | 0.987 | 0.966 | 0.985 |
| 101742_at   | 0.378 | 0.957 | 0.912 | 0.968 | 0.952 |
| 101743_f_at | 0.269 | 0.901 | 1.319 | 0.923 | 0.875 |
| 101744_i_at | 0.163 | 0.965 | 1.025 | 1.075 | 0.946 |
| 101745_f_at | 0.291 | 0.909 | 1.156 | 0.952 | 0.875 |
| 101746_i_at | 0.488 | 0.972 | 0.965 | 0.995 | 0.942 |
| 101747_f_at | 0.142 | 0.926 | 1.225 | 0.873 | 0.802 |
| 101748_at   | 0.353 | 0.847 | 0.802 | 0.910 | 0.857 |
| 101749_at   | 0.472 | 1.003 | 1.018 | 1.006 | 0.999 |
| 101751_f_at | 0.072 | 1.007 | 1.654 | 0.875 | 0.971 |
| 101752_f_at | 0.209 | 0.985 | 1.704 | 0.989 | 0.940 |
| 101753_s_at | 0.270 | 0.945 | 0.801 | 0.981 | 1.072 |
| 101754_f_at | 0.379 | 0.892 | 0.903 | 0.971 | 0.877 |
| 101755_f_at | 0.478 | 0.889 | 0.865 | 0.935 | 0.884 |
| 101756_f_at | 0.306 | 0.896 | 0.858 | 0.953 | 0.887 |
| 101757_at   | 0.260 | 0.821 | 0.851 | 0.961 | 0.872 |
| 101758_at   | 0.391 | 0.818 | 0.808 | 0.894 | 0.787 |
| 101759_at   | 0.244 | 0.974 | 0.940 | 1.007 | 0.977 |
| 101760_at   | 0.290 | 0.784 | 0.768 | 0.883 | 0.769 |
| 101761_f_at | 0.143 | 0.886 | 0.958 | 0.931 | 0.814 |
| 101762_at   | 0.353 | 0.780 | 0.768 | 1.114 | 0.787 |
| 101763_at   | 0.303 | 0.885 | 0.825 | 0.949 | 0.889 |
| 101764_at   | 0.383 | 0.874 | 0.827 | 0.924 | 0.889 |
| 101765_at   | 0.484 | 0.879 | 0.855 | 0.938 | 0.861 |
| 101768_at   | 0.233 | 0.930 | 0.871 | 0.950 | 0.963 |
| 101769_at   | 0.152 | 0.924 | 0.864 | 0.985 | 0.930 |
| 101770_i_at | 0.400 | 0.954 | 0.995 | 1.012 | 0.959 |
| 101771_r_at | 0.196 | 0.895 | 0.843 | 0.977 | 0.950 |
| 101772_r_at | 0.406 | 0.782 | 0.810 | 0.885 | 0.777 |
| 101773_r_at | 0.434 | 0.818 | 0.840 | 0.897 | 0.831 |
| 101774_at   | 0.272 | 0.877 | 0.884 | 0.976 | 0.893 |
| 101775_at   | 0.456 | 0.881 | 0.873 | 0.955 | 0.847 |
| 101776_at   | 0.388 | 0.819 | 0.809 | 0.888 | 0.803 |
| 101777_at   | 0.366 | 0.920 | 0.864 | 0.958 | 0.867 |
| 101778_at   | 0.337 | 0.906 | 0.907 | 0.994 | 0.976 |
| 101779_at   | 0.247 | 0.812 | 0.789 | 0.919 | 0.813 |
| 101780_at   | 0.382 | 0.897 | 0.936 | 0.936 | 0.908 |
| 101781_f_at | 0.309 | 0.951 | 0.928 | 1.030 | 1.019 |
| 101782_at   | 0.492 | 0.857 | 0.843 | 0.913 | 0.824 |

|             |       |       |       |       |       |
|-------------|-------|-------|-------|-------|-------|
| 101783_i_at | 0.301 | 0.813 | 0.769 | 0.913 | 0.813 |
| 101784_f_at | 0.380 | 0.907 | 0.874 | 0.907 | 0.929 |
| 101786_at   | 0.293 | 0.856 | 0.862 | 0.907 | 0.905 |
| 101787_f_at | 0.249 | 0.997 | 1.151 | 0.797 | 1.437 |
| 101788_f_at | 0.481 | 0.882 | 0.874 | 0.926 | 0.864 |
| 101789_i_at | 0.399 | 0.811 | 0.781 | 0.890 | 0.787 |
| 101790_f_at | 0.379 | 0.857 | 0.806 | 0.883 | 0.892 |
| 101791_f_at | 0.390 | 0.867 | 0.862 | 0.953 | 0.874 |
| 101792_at   | 0.053 | 0.921 | 0.927 | 0.906 | 0.846 |
| 101793_at   | 0.097 | 0.857 | 0.956 | 0.855 | 0.969 |
| 101794_f_at | 0.472 | 0.871 | 0.840 | 0.896 | 0.874 |
| 101795_f_at | 0.293 | 0.868 | 0.815 | 0.907 | 0.903 |
| 101796_at   | 0.299 | 0.860 | 0.837 | 0.932 | 0.906 |
| 101797_at   | 0.495 | 0.787 | 0.756 | 0.829 | 0.773 |
| 101798_at   | 0.505 | 0.854 | 0.845 | 0.870 | 0.838 |
| 101799_at   | 0.505 | 0.787 | 0.745 | 0.844 | 0.724 |
| 101800_at   | 0.149 | 1.102 | 1.266 | 1.015 | 1.633 |
| 101801_at   | 0.304 | 0.876 | 0.806 | 0.908 | 0.865 |
| 101802_at   | 0.434 | 0.934 | 0.919 | 0.952 | 0.951 |
| 101803_at   | 0.021 | 0.990 | 2.363 | 0.993 | 1.179 |
| 101804_at   | 0.328 | 0.878 | 0.827 | 0.981 | 0.883 |
| 101805_f_at | 0.344 | 0.931 | 0.881 | 1.004 | 0.924 |
| 101806_at   | 0.419 | 0.860 | 0.813 | 0.908 | 0.874 |
| 101807_at   | 0.463 | 0.903 | 0.880 | 0.915 | 0.914 |
| 101808_at   | 0.378 | 0.842 | 0.845 | 0.906 | 0.869 |
| 101809_at   | 0.499 | 0.817 | 0.813 | 0.875 | 0.800 |
| 101810_at   | 0.363 | 0.897 | 0.850 | 0.946 | 0.870 |
| 101811_at   | 0.475 | 0.808 | 0.754 | 0.850 | 0.782 |
| 101814_at   | 0.397 | 0.920 | 0.866 | 0.962 | 0.901 |
| 101815_at   | 0.409 | 0.906 | 0.857 | 0.920 | 0.869 |
| 101816_at   | 0.243 | 0.941 | 0.857 | 0.996 | 0.915 |
| 101820_at   | 0.318 | 0.932 | 0.909 | 1.013 | 0.898 |
| 101821_at   | 0.309 | 0.946 | 0.865 | 0.990 | 0.906 |
| 101822_at   | 0.343 | 0.867 | 0.841 | 0.976 | 0.853 |
| 101823_at   | 0.347 | 0.895 | 0.858 | 0.910 | 0.908 |
| 101824_at   | 0.425 | 0.936 | 0.934 | 0.976 | 0.882 |
| 101825_at   | 0.443 | 0.960 | 0.950 | 1.026 | 0.964 |
| 101826_at   | 0.098 | 1.041 | 2.907 | 0.974 | 1.111 |
| 101827_at   | 0.472 | 0.771 | 0.780 | 0.830 | 0.746 |
| 101828_at   | 0.465 | 0.934 | 0.862 | 0.951 | 0.856 |
| 101829_at   | 0.297 | 0.870 | 0.806 | 0.929 | 0.839 |
| 101830_at   | 0.267 | 0.913 | 0.853 | 0.969 | 0.919 |
| 101831_at   | 0.196 | 0.916 | 1.058 | 0.934 | 0.973 |
| 101834_at   | 0.332 | 1.133 | 1.100 | 1.049 | 1.108 |
| 101835_at   | 0.194 | 0.893 | 0.980 | 0.935 | 0.925 |
| 101836_at   | 0.305 | 1.052 | 1.032 | 1.087 | 1.028 |
| 101837_g_at | 0.246 | 0.881 | 1.036 | 1.046 | 1.113 |

|             |       |       |        |       |       |
|-------------|-------|-------|--------|-------|-------|
| 101838_r_at | 0.465 | 0.928 | 0.887  | 0.910 | 0.899 |
| 101839_at   | 0.368 | 0.893 | 0.887  | 0.961 | 0.904 |
| 101840_at   | 0.303 | 0.870 | 0.900  | 0.947 | 0.915 |
| 101841_at   | 0.314 | 0.950 | 0.963  | 0.988 | 0.988 |
| 101842_g_at | 0.165 | 0.910 | 1.006  | 1.024 | 0.964 |
| 101843_at   | 0.231 | 0.999 | 0.961  | 1.047 | 0.941 |
| 101844_at   | 0.428 | 0.882 | 0.814  | 0.882 | 0.856 |
| 101845_s_at | 0.308 | 0.909 | 0.910  | 0.898 | 0.977 |
| 101846_r_at | 0.387 | 0.898 | 0.887  | 0.902 | 0.918 |
| 101847_at   | 0.138 | 0.921 | 0.993  | 0.966 | 1.036 |
| 101848_g_at | 0.145 | 1.129 | 1.101  | 0.943 | 1.185 |
| 101850_at   | 0.331 | 1.346 | 1.216  | 1.104 | 1.251 |
| 101851_at   | 0.212 | 1.310 | 1.379  | 1.046 | 1.184 |
| 101853_f_at | 0.438 | 1.061 | 1.228  | 1.041 | 1.164 |
| 101854_r_at | 0.231 | 1.012 | 0.966  | 0.942 | 0.974 |
| 101855_at   | 0.349 | 1.051 | 0.947  | 1.044 | 1.046 |
| 101856_at   | 0.057 | 0.928 | 0.873  | 1.038 | 0.813 |
| 101857_at   | 0.100 | 0.887 | 0.872  | 0.979 | 0.916 |
| 101858_at   | 0.159 | 1.097 | 0.948  | 1.012 | 0.957 |
| 101859_at   | 0.289 | 0.870 | 0.846  | 0.957 | 0.847 |
| 101860_at   | 0.211 | 0.962 | 1.084  | 0.981 | 1.098 |
| 101861_at   | 0.369 | 0.929 | 0.902  | 0.946 | 0.986 |
| 101862_at   | 0.225 | 1.011 | 0.889  | 1.000 | 0.913 |
| 101863_at   | 0.440 | 0.937 | 0.870  | 0.946 | 0.920 |
| 101864_at   | 0.505 | 0.948 | 0.935  | 0.974 | 0.925 |
| 101865_at   | 0.179 | 0.948 | 1.020  | 0.995 | 1.054 |
| 101866_at   | 0.072 | 1.013 | 1.019  | 0.915 | 1.118 |
| 101867_at   | 0.125 | 1.275 | 1.065  | 1.158 | 1.178 |
| 101868_i_at | 0.126 | 0.755 | 1.072  | 0.788 | 0.845 |
| 101869_s_at | 0.239 | 0.993 | 0.997  | 1.004 | 1.054 |
| 101870_at   | 0.008 | 2.841 | 12.247 | 0.959 | 1.051 |
| 101871_f_at | 0.194 | 0.825 | 1.464  | 0.831 | 0.824 |
| 101872_at   | 0.313 | 0.906 | 0.934  | 0.893 | 0.845 |
| 101873_at   | 0.422 | 0.821 | 0.807  | 0.887 | 0.817 |
| 101874_s_at | 0.496 | 0.957 | 0.946  | 0.989 | 0.944 |
| 101875_at   | 0.355 | 0.984 | 0.927  | 0.993 | 0.946 |
| 101876_s_at | 0.126 | 1.325 | 1.533  | 1.080 | 1.485 |
| 101877_at   | 0.371 | 1.174 | 1.162  | 1.042 | 1.189 |
| 101878_at   | 0.008 | 0.833 | 1.298  | 0.775 | 1.045 |
| 101879_s_at | 0.120 | 0.957 | 1.005  | 0.891 | 1.014 |
| 101880_at   | 0.360 | 0.828 | 0.814  | 0.818 | 0.811 |
| 101881_g_at | 0.284 | 1.107 | 1.109  | 1.170 | 1.134 |
| 101882_s_at | 0.178 | 0.948 | 0.896  | 0.989 | 0.907 |
| 101883_s_at | 0.422 | 0.927 | 0.877  | 0.878 | 0.887 |
| 101884_at   | 0.432 | 0.913 | 0.946  | 0.905 | 0.937 |
| 101885_at   | 0.426 | 1.014 | 1.003  | 0.989 | 1.048 |
| 101886_f_at | 0.299 | 1.013 | 1.153  | 1.023 | 1.091 |



|             |       |       |       |       |       |
|-------------|-------|-------|-------|-------|-------|
| 101887_at   | 0.238 | 0.895 | 0.867 | 0.979 | 0.863 |
| 101888_at   | 0.494 | 0.894 | 0.835 | 0.905 | 0.834 |
| 101889_s_at | 0.076 | 0.944 | 0.867 | 0.894 | 1.041 |
| 101890_f_at | 0.480 | 1.121 | 1.188 | 1.068 | 1.180 |
| 101891_at   | 0.459 | 0.861 | 0.805 | 0.909 | 0.821 |
| 101892_f_at | 0.499 | 0.993 | 1.000 | 0.949 | 1.023 |
| 101893_r_at | 0.415 | 0.997 | 0.961 | 0.984 | 0.980 |
| 101894_s_at | 0.459 | 1.091 | 1.037 | 1.011 | 1.058 |
| 101896_at   | 0.255 | 0.980 | 0.942 | 0.988 | 1.012 |
| 101897_g_at | 0.189 | 0.920 | 0.881 | 1.052 | 0.965 |
| 101898_s_at | 0.365 | 0.941 | 0.897 | 0.990 | 0.954 |
| 101899_at   | 0.228 | 0.886 | 0.817 | 0.935 | 0.809 |
| 101900_at   | 0.081 | 0.988 | 0.747 | 0.894 | 0.948 |
| 101901_at   | 0.461 | 0.979 | 1.077 | 0.972 | 1.057 |
| 101902_at   | 0.456 | 0.996 | 1.018 | 1.045 | 1.033 |
| 101903_at   | 0.173 | 0.907 | 0.840 | 0.986 | 0.874 |
| 101904_at   | 0.326 | 0.900 | 0.808 | 0.955 | 0.904 |
| 101905_at   | 0.508 | 0.924 | 0.904 | 0.934 | 0.907 |
| 101906_at   | 0.200 | 1.239 | 1.401 | 0.960 | 1.368 |
| 101907_s_at | 0.461 | 0.837 | 0.783 | 0.902 | 0.779 |
| 101908_s_at | 0.243 | 0.864 | 0.969 | 0.985 | 0.965 |
| 101909_f_at | 0.136 | 0.928 | 0.880 | 1.046 | 0.908 |
| 101910_f_at | 0.161 | 0.880 | 0.858 | 1.080 | 0.878 |
| 101912_at   | 0.114 | 1.054 | 1.093 | 1.195 | 1.462 |
| 101913_at   | 0.475 | 1.059 | 1.109 | 1.028 | 1.034 |
| 101914_at   | 0.197 | 1.146 | 1.118 | 1.008 | 1.064 |
| 101916_at   | 0.152 | 1.019 | 1.045 | 0.983 | 0.958 |
| 101917_at   | 0.377 | 0.853 | 0.818 | 0.832 | 0.844 |
| 101918_at   | 0.400 | 1.040 | 1.142 | 1.087 | 1.019 |
| 101919_at   | 0.221 | 1.110 | 1.040 | 0.951 | 1.109 |
| 101920_at   | 0.379 | 0.977 | 1.030 | 0.996 | 0.989 |
| 101921_at   | 0.217 | 1.028 | 0.941 | 1.047 | 0.946 |
| 101922_at   | 0.306 | 0.913 | 0.924 | 0.838 | 0.885 |
| 101923_at   | 0.124 | 1.093 | 1.468 | 1.066 | 1.280 |
| 101924_at   | 0.188 | 0.875 | 0.846 | 0.931 | 0.876 |
| 101926_at   | 0.452 | 0.963 | 0.967 | 0.999 | 0.992 |
| 101927_at   | 0.374 | 0.871 | 0.810 | 0.922 | 0.868 |
| 101928_at   | 0.290 | 0.891 | 0.866 | 0.973 | 0.868 |
| 101929_at   | 0.019 | 1.027 | 0.952 | 1.072 | 0.751 |
| 101930_at   | 0.203 | 1.164 | 1.023 | 1.169 | 1.053 |
| 101931_at   | 0.481 | 1.119 | 1.122 | 1.051 | 1.196 |
| 101932_at   | 0.246 | 1.293 | 1.226 | 1.065 | 1.207 |
| 101933_at   | 0.158 | 0.916 | 0.929 | 0.979 | 1.061 |
| 101934_at   | 0.191 | 1.106 | 1.102 | 0.955 | 1.130 |
| 101936_at   | 0.361 | 1.347 | 1.351 | 1.099 | 1.325 |
| 101937_s_at | 0.387 | 0.946 | 0.996 | 0.983 | 1.053 |
| 101938_at   | 0.470 | 0.856 | 0.880 | 0.907 | 0.866 |

|             |       |       |       |       |       |
|-------------|-------|-------|-------|-------|-------|
| 101939_at   | 0.353 | 1.123 | 1.132 | 1.000 | 1.141 |
| 101940_at   | 0.281 | 0.997 | 0.950 | 0.971 | 0.985 |
| 101942_at   | 0.319 | 1.023 | 0.913 | 0.959 | 0.994 |
| 101943_at   | 0.440 | 1.107 | 1.120 | 1.082 | 1.070 |
| 101944_at   | 0.367 | 0.807 | 0.855 | 0.902 | 0.876 |
| 101945_g_at | 0.323 | 0.846 | 0.944 | 0.966 | 1.005 |
| 101946_at   | 0.292 | 0.839 | 1.007 | 1.072 | 1.047 |
| 101947_at   | 0.410 | 1.168 | 1.124 | 1.067 | 1.093 |
| 101948_at   | 0.415 | 1.265 | 1.166 | 1.219 | 1.271 |
| 101949_at   | 0.329 | 0.887 | 0.895 | 0.891 | 0.839 |
| 101950_at   | 0.505 | 1.217 | 1.222 | 1.163 | 1.218 |
| 101952_at   | 0.467 | 0.951 | 0.913 | 0.937 | 0.912 |
| 101953_at   | 0.329 | 0.851 | 0.844 | 0.912 | 0.871 |
| 101954_at   | 0.160 | 1.151 | 1.353 | 1.071 | 1.370 |
| 101955_at   | 0.273 | 0.916 | 1.058 | 0.862 | 0.833 |
| 101956_at   | 0.392 | 0.950 | 0.965 | 0.946 | 0.959 |
| 101957_f_at | 0.074 | 1.046 | 0.918 | 0.928 | 1.023 |
| 101958_f_at | 0.477 | 1.129 | 1.191 | 1.059 | 1.181 |
| 101959_r_at | 0.308 | 1.129 | 1.232 | 1.037 | 1.057 |
| 101960_at   | 0.190 | 1.358 | 1.410 | 1.100 | 1.345 |
| 101961_at   | 0.106 | 1.168 | 1.200 | 0.997 | 1.164 |
| 101962_at   | 0.157 | 1.279 | 1.075 | 1.103 | 1.145 |
| 101963_at   | 0.350 | 1.113 | 1.224 | 1.067 | 1.213 |
| 101964_at   | 0.165 | 1.095 | 1.433 | 1.281 | 1.078 |
| 101965_at   | 0.337 | 1.140 | 1.095 | 1.105 | 1.175 |
| 101966_s_at | 0.231 | 0.785 | 0.976 | 0.989 | 1.043 |
| 101967_at   | 0.342 | 0.984 | 0.967 | 1.008 | 0.936 |
| 101968_at   | 0.481 | 0.863 | 0.862 | 0.901 | 0.875 |
| 101969_at   | 0.121 | 1.077 | 1.029 | 1.142 | 0.971 |
| 101970_at   | 0.434 | 0.985 | 0.942 | 0.998 | 0.933 |
| 101971_at   | 0.303 | 1.301 | 1.222 | 1.091 | 1.237 |
| 101972_at   | 0.181 | 1.138 | 1.036 | 0.955 | 1.171 |
| 101973_at   | 0.472 | 1.150 | 1.235 | 1.128 | 1.203 |
| 101975_at   | 0.112 | 0.859 | 0.851 | 1.018 | 0.857 |
| 101976_at   | 0.213 | 1.115 | 1.182 | 1.034 | 1.178 |
| 101977_at   | 0.125 | 1.217 | 1.150 | 1.052 | 1.076 |
| 101978_at   | 0.278 | 0.937 | 0.914 | 0.922 | 0.955 |
| 101979_at   | 0.051 | 0.995 | 1.559 | 0.994 | 1.098 |
| 101980_at   | 0.166 | 1.002 | 0.935 | 0.964 | 1.086 |
| 101981_at   | 0.255 | 0.754 | 0.825 | 0.888 | 0.845 |
| 101982_at   | 0.463 | 1.012 | 1.134 | 0.998 | 1.054 |
| 101984_at   | 0.073 | 0.953 | 1.013 | 0.953 | 1.123 |
| 101985_at   | 0.228 | 0.842 | 0.864 | 0.964 | 0.895 |
| 101989_at   | 0.311 | 1.007 | 1.062 | 1.126 | 0.991 |
| 101990_at   | 0.417 | 1.052 | 1.006 | 1.060 | 1.055 |
| 101991_at   | 0.258 | 1.314 | 1.315 | 1.132 | 1.267 |
| 101992_at   | 0.096 | 0.946 | 1.033 | 0.879 | 1.024 |

|             |       |       |       |       |       |
|-------------|-------|-------|-------|-------|-------|
| 101993_at   | 0.377 | 0.980 | 0.969 | 1.028 | 1.023 |
| 101995_at   | 0.163 | 1.069 | 0.956 | 0.943 | 0.997 |
| 101996_at   | 0.111 | 1.186 | 1.252 | 0.989 | 1.199 |
| 101997_at   | 0.215 | 1.049 | 1.020 | 0.967 | 1.089 |
| 101998_at   | 0.323 | 1.074 | 0.986 | 0.991 | 1.056 |
| 102000_f_at | 0.440 | 1.005 | 1.014 | 1.090 | 1.012 |
| 102001_at   | 0.016 | 0.857 | 1.123 | 0.878 | 1.148 |
| 102002_at   | 0.312 | 1.232 | 1.090 | 1.157 | 1.112 |
| 102003_at   | 0.239 | 0.969 | 0.996 | 1.014 | 0.929 |
| 102004_at   | 0.273 | 0.819 | 0.816 | 0.936 | 0.862 |
| 102007_at   | 0.431 | 1.056 | 1.036 | 1.056 | 1.008 |
| 102009_at   | 0.509 | 0.905 | 0.898 | 0.898 | 0.908 |
| 102010_at   | 0.371 | 0.888 | 0.879 | 0.945 | 0.876 |
| 102011_at   | 0.271 | 0.967 | 0.921 | 0.966 | 0.970 |
| 102012_at   | 0.074 | 1.216 | 1.404 | 1.035 | 1.393 |
| 102013_at   | 0.480 | 0.889 | 0.877 | 0.918 | 0.843 |
| 102014_at   | 0.396 | 0.902 | 0.842 | 0.906 | 0.893 |
| 102015_at   | 0.382 | 0.902 | 0.841 | 0.908 | 0.882 |
| 102016_at   | 0.279 | 0.849 | 0.707 | 1.623 | 0.770 |
| 102017_at   | 0.233 | 1.039 | 0.988 | 0.973 | 1.109 |
| 102018_at   | 0.196 | 1.004 | 0.974 | 1.041 | 0.907 |
| 102019_at   | 0.220 | 1.036 | 1.111 | 0.982 | 1.220 |
| 102020_at   | 0.195 | 0.989 | 0.917 | 1.135 | 0.908 |
| 102021_at   | 0.290 | 1.054 | 1.174 | 1.036 | 1.002 |
| 102022_at   | 0.353 | 1.024 | 0.993 | 1.030 | 1.114 |
| 102024_at   | 0.246 | 1.034 | 0.953 | 0.947 | 0.973 |
| 102025_at   | 0.070 | 0.898 | 1.610 | 0.872 | 1.056 |
| 102026_s_at | 0.182 | 1.029 | 0.915 | 1.011 | 1.003 |
| 102027_s_at | 0.309 | 0.953 | 0.892 | 0.962 | 0.904 |
| 102028_at   | 0.145 | 1.087 | 1.140 | 0.952 | 1.210 |
| 102029_at   | 0.293 | 0.976 | 0.995 | 0.921 | 1.012 |
| 102030_at   | 0.233 | 0.903 | 0.924 | 0.982 | 0.991 |
| 102031_at   | 0.470 | 1.020 | 1.036 | 1.011 | 1.055 |
| 102032_at   | 0.364 | 0.974 | 0.916 | 0.948 | 0.948 |
| 102033_at   | 0.069 | 1.011 | 0.996 | 1.136 | 0.993 |
| 102035_at   | 0.247 | 0.943 | 0.956 | 1.063 | 0.977 |
| 102036_at   | 0.309 | 0.932 | 0.951 | 1.007 | 0.911 |
| 102037_at   | 0.398 | 1.088 | 1.076 | 1.079 | 1.043 |
| 102038_at   | 0.355 | 1.037 | 1.096 | 1.043 | 1.018 |
| 102039_at   | 0.434 | 1.036 | 1.045 | 1.016 | 1.015 |
| 102040_at   | 0.189 | 0.997 | 1.091 | 0.965 | 1.025 |
| 102041_at   | 0.345 | 1.012 | 0.959 | 1.130 | 0.939 |
| 102042_at   | 0.345 | 0.937 | 0.980 | 0.981 | 1.000 |
| 102043_at   | 0.162 | 1.089 | 0.916 | 0.988 | 1.002 |
| 102044_at   | 0.323 | 1.025 | 0.931 | 1.065 | 1.028 |
| 102046_at   | 0.449 | 1.043 | 1.023 | 1.017 | 1.062 |
| 102047_at   | 0.096 | 1.185 | 1.360 | 1.015 | 1.230 |

|             |       |       |       |       |       |
|-------------|-------|-------|-------|-------|-------|
| 102048_at   | 0.500 | 0.920 | 0.958 | 0.925 | 0.962 |
| 102049_at   | 0.312 | 0.950 | 0.813 | 1.330 | 0.932 |
| 102050_at   | 0.459 | 0.876 | 0.875 | 0.953 | 0.889 |
| 102052_at   | 0.261 | 0.925 | 0.983 | 1.160 | 1.049 |
| 102053_at   | 0.260 | 1.238 | 1.153 | 1.068 | 1.266 |
| 102054_at   | 0.376 | 1.121 | 1.117 | 1.027 | 1.104 |
| 102056_f_at | 0.276 | 1.304 | 1.268 | 1.064 | 1.287 |
| 102057_r_at | 0.393 | 0.858 | 0.806 | 0.928 | 0.821 |
| 102058_at   | 0.505 | 1.157 | 1.205 | 1.134 | 1.196 |
| 102059_at   | 0.308 | 0.991 | 0.927 | 1.036 | 0.973 |
| 102060_at   | 0.263 | 1.255 | 1.126 | 1.073 | 1.098 |
| 102061_at   | 0.323 | 1.088 | 1.005 | 1.084 | 0.954 |
| 102062_at   | 0.335 | 1.212 | 1.132 | 1.131 | 1.114 |
| 102063_at   | 0.291 | 1.003 | 0.947 | 0.963 | 1.032 |
| 102064_at   | 0.145 | 0.911 | 1.036 | 0.921 | 1.020 |
| 102065_at   | 0.266 | 0.897 | 1.019 | 0.939 | 0.890 |
| 102069_at   | 0.315 | 0.985 | 1.039 | 1.031 | 0.987 |
| 102070_at   | 0.163 | 0.934 | 0.894 | 1.002 | 0.859 |
| 102071_at   | 0.158 | 0.918 | 0.876 | 0.965 | 0.896 |
| 102072_g_at | 0.143 | 1.096 | 1.004 | 1.065 | 0.998 |
| 102073_at   | 0.449 | 0.879 | 0.854 | 0.942 | 0.878 |
| 102074_at   | 0.325 | 0.848 | 0.837 | 0.957 | 0.870 |
| 102075_at   | 0.502 | 0.934 | 0.907 | 0.950 | 0.908 |
| 102076_at   | 0.047 | 1.140 | 2.694 | 0.813 | 1.007 |
| 102077_at   | 0.496 | 0.942 | 0.924 | 0.972 | 0.916 |
| 102078_at   | 0.168 | 0.943 | 0.896 | 0.990 | 0.925 |
| 102079_at   | 0.378 | 0.956 | 0.883 | 0.965 | 0.911 |
| 102080_at   | 0.250 | 0.908 | 0.937 | 1.016 | 0.888 |
| 102081_at   | 0.508 | 0.995 | 0.972 | 0.995 | 0.969 |
| 102082_at   | 0.387 | 0.861 | 0.840 | 0.956 | 0.864 |
| 102083_at   | 0.247 | 0.892 | 0.883 | 0.938 | 0.955 |
| 102084_f_at | 0.133 | 0.886 | 0.824 | 0.974 | 0.878 |
| 102085_at   | 0.434 | 0.938 | 0.918 | 0.979 | 0.943 |
| 102086_r_at | 0.405 | 0.888 | 0.898 | 0.943 | 0.891 |
| 102087_at   | 0.273 | 0.982 | 0.897 | 1.040 | 0.911 |
| 102088_at   | 0.340 | 0.921 | 0.930 | 0.978 | 0.913 |
| 102089_at   | 0.299 | 0.939 | 0.942 | 1.024 | 0.930 |
| 102090_f_at | 0.216 | 0.878 | 0.784 | 0.887 | 0.828 |
| 102091_f_at | 0.187 | 0.795 | 0.826 | 0.799 | 1.069 |
| 102092_s_at | 0.434 | 0.781 | 0.799 | 0.821 | 0.719 |
| 102093_f_at | 0.375 | 1.105 | 1.050 | 1.073 | 1.058 |
| 102094_f_at | 0.035 | 1.022 | 0.880 | 1.026 | 0.932 |
| 102095_f_at | 0.220 | 1.021 | 0.928 | 0.973 | 1.038 |
| 102096_f_at | 0.072 | 0.804 | 0.775 | 0.931 | 0.757 |
| 102097_f_at | 0.425 | 0.968 | 1.005 | 0.977 | 0.958 |
| 102098_at   | 0.109 | 1.039 | 1.114 | 0.910 | 1.024 |
| 102099_f_at | 0.181 | 1.015 | 0.967 | 1.044 | 0.977 |

|             |       |       |       |       |       |
|-------------|-------|-------|-------|-------|-------|
| 102100_f_at | 0.359 | 1.030 | 0.993 | 0.932 | 0.981 |
| 102101_f_at | 0.382 | 0.936 | 0.914 | 0.976 | 1.017 |
| 102102_at   | 0.297 | 1.185 | 1.160 | 1.050 | 1.123 |
| 102103_f_at | 0.208 | 1.128 | 1.172 | 1.020 | 1.134 |
| 102104_f_at | 0.231 | 1.087 | 1.279 | 0.990 | 1.216 |
| 102105_f_at | 0.329 | 0.865 | 0.851 | 0.955 | 0.868 |
| 102106_at   | 0.303 | 0.908 | 0.860 | 0.973 | 0.859 |
| 102107_at   | 0.490 | 0.950 | 0.933 | 0.983 | 0.938 |
| 102108_f_at | 0.159 | 1.116 | 1.004 | 0.982 | 0.944 |
| 102109_at   | 0.088 | 0.986 | 1.041 | 0.915 | 1.036 |
| 102110_at   | 0.297 | 0.906 | 0.962 | 0.902 | 0.935 |
| 102111_f_at | 0.281 | 0.955 | 0.835 | 0.957 | 0.904 |
| 102112_s_at | 0.392 | 0.865 | 0.831 | 0.921 | 0.879 |
| 102113_f_at | 0.510 | 0.857 | 0.830 | 0.884 | 0.818 |
| 102114_f_at | 0.235 | 0.928 | 0.880 | 1.028 | 1.013 |
| 102115_r_at | 0.443 | 0.859 | 0.833 | 0.890 | 0.862 |
| 102116_f_at | 0.428 | 0.973 | 1.001 | 0.985 | 1.012 |
| 102117_at   | 0.215 | 0.970 | 0.905 | 0.940 | 0.970 |
| 102118_at   | 0.393 | 0.925 | 0.920 | 0.983 | 0.939 |
| 102119_at   | 0.488 | 0.896 | 0.841 | 0.931 | 0.817 |
| 102120_f_at | 0.369 | 0.999 | 0.965 | 0.998 | 1.004 |
| 102121_f_at | 0.151 | 1.104 | 0.960 | 0.982 | 0.968 |
| 102122_f_at | 0.256 | 0.943 | 0.880 | 0.955 | 0.947 |
| 102123_at   | 0.155 | 0.919 | 0.934 | 1.011 | 1.069 |
| 102124_f_at | 0.174 | 1.004 | 0.953 | 0.888 | 0.897 |
| 102125_f_at | 0.241 | 1.099 | 1.116 | 0.971 | 1.057 |
| 102126_at   | 0.147 | 1.067 | 1.156 | 0.984 | 1.129 |
| 102127_at   | 0.334 | 0.829 | 0.814 | 0.927 | 0.854 |
| 102128_f_at | 0.383 | 1.084 | 1.099 | 1.021 | 1.050 |
| 102129_at   | 0.417 | 0.895 | 0.895 | 0.982 | 0.895 |
| 102130_f_at | 0.354 | 0.972 | 0.943 | 0.952 | 1.034 |
| 102131_f_at | 0.325 | 0.925 | 0.846 | 0.942 | 0.898 |
| 102132_i_at | 0.486 | 0.833 | 0.788 | 0.876 | 0.790 |
| 102133_at   | 0.372 | 0.937 | 0.884 | 0.965 | 0.976 |
| 102134_f_at | 0.424 | 0.995 | 1.033 | 1.015 | 1.034 |
| 102135_at   | 0.400 | 0.866 | 0.797 | 0.861 | 0.836 |
| 102136_r_at | 0.367 | 0.917 | 0.888 | 0.953 | 0.967 |
| 102137_f_at | 0.432 | 1.109 | 1.053 | 1.060 | 1.086 |
| 102138_at   | 0.392 | 0.780 | 0.818 | 0.853 | 0.757 |
| 102139_at   | 0.510 | 0.910 | 0.874 | 0.940 | 0.875 |
| 102140_at   | 0.400 | 0.920 | 0.879 | 0.946 | 0.929 |
| 102141_f_at | 0.200 | 1.125 | 1.087 | 0.927 | 1.088 |
| 102142_r_at | 0.427 | 0.898 | 0.856 | 0.910 | 0.879 |
| 102143_at   | 0.340 | 0.876 | 0.827 | 0.958 | 0.869 |
| 102144_f_at | 0.291 | 1.329 | 1.194 | 1.024 | 1.326 |
| 102145_f_at | 0.228 | 0.943 | 0.858 | 0.978 | 0.854 |
| 102146_at   | 0.212 | 0.875 | 0.880 | 1.044 | 0.905 |

|             |       |       |       |       |       |
|-------------|-------|-------|-------|-------|-------|
| 102147_at   | 0.428 | 0.848 | 0.808 | 0.921 | 0.872 |
| 102148_f_at | 0.318 | 0.867 | 0.852 | 0.962 | 0.857 |
| 102149_f_at | 0.437 | 0.874 | 0.866 | 0.933 | 0.885 |
| 102150_f_at | 0.202 | 0.902 | 0.851 | 0.988 | 0.869 |
| 102151_at   | 0.329 | 0.831 | 0.893 | 0.944 | 0.869 |
| 102152_f_at | 0.427 | 0.916 | 1.005 | 0.958 | 0.904 |
| 102153_at   | 0.376 | 0.943 | 0.916 | 0.999 | 0.912 |
| 102154_f_at | 0.138 | 1.033 | 1.693 | 0.871 | 0.906 |
| 102155_f_at | 0.130 | 0.987 | 1.545 | 0.935 | 0.967 |
| 102156_f_at | 0.001 | 1.820 | 4.337 | 0.842 | 1.269 |
| 102157_f_at | 0.051 | 0.965 | 2.187 | 0.790 | 0.924 |
| 102158_at   | 0.254 | 0.889 | 0.779 | 0.892 | 0.808 |
| 102159_at   | 0.399 | 0.925 | 0.965 | 0.951 | 0.949 |
| 102160_at   | 0.335 | 0.850 | 0.801 | 0.894 | 0.816 |
| 102161_f_at | 0.283 | 0.980 | 1.111 | 0.977 | 1.023 |
| 102162_at   | 0.246 | 0.805 | 0.786 | 0.891 | 0.853 |
| 102163_at   | 0.370 | 0.835 | 0.778 | 0.880 | 0.850 |
| 102164_at   | 0.422 | 0.944 | 0.927 | 1.019 | 0.974 |
| 102165_at   | 0.354 | 0.859 | 0.823 | 0.922 | 0.875 |
| 102166_g_at | 0.216 | 1.018 | 0.942 | 1.042 | 1.020 |
| 102167_at   | 0.371 | 0.888 | 0.810 | 0.888 | 0.861 |
| 102168_at   | 0.323 | 0.944 | 0.937 | 0.998 | 0.959 |
| 102169_at   | 0.443 | 0.895 | 0.892 | 0.955 | 0.917 |
| 102170_at   | 0.468 | 0.907 | 0.915 | 0.944 | 0.869 |
| 102171_r_at | 0.242 | 0.856 | 0.817 | 0.980 | 0.846 |
| 102192_r_at | 0.219 | 0.978 | 0.955 | 1.020 | 0.939 |
| 102193_at   | 0.206 | 0.947 | 0.939 | 0.999 | 1.011 |
| 102194_at   | 0.093 | 0.969 | 0.962 | 0.910 | 0.987 |
| 102195_at   | 0.095 | 1.120 | 1.133 | 0.937 | 1.246 |
| 102196_at   | 0.417 | 1.179 | 1.105 | 1.107 | 1.100 |
| 102197_at   | 0.067 | 1.128 | 1.297 | 0.997 | 1.249 |
| 102198_at   | 0.480 | 0.844 | 0.843 | 0.890 | 0.835 |
| 102199_at   | 0.310 | 0.987 | 0.981 | 1.035 | 1.031 |
| 102200_at   | 0.403 | 0.855 | 0.829 | 0.892 | 0.862 |
| 102201_s_at | 0.291 | 1.076 | 1.066 | 1.021 | 1.111 |
| 102202_s_at | 0.411 | 0.868 | 0.860 | 0.905 | 0.818 |
| 102203_at   | 0.252 | 0.942 | 0.885 | 0.937 | 0.983 |
| 102204_at   | 0.434 | 0.945 | 1.008 | 0.962 | 0.925 |
| 102205_at   | 0.273 | 0.874 | 0.897 | 0.916 | 0.967 |
| 102206_at   | 0.203 | 0.895 | 0.879 | 0.957 | 0.932 |
| 102207_at   | 0.335 | 1.298 | 1.151 | 1.150 | 1.189 |
| 102208_at   | 0.292 | 0.830 | 0.923 | 0.950 | 0.940 |
| 102209_at   | 0.410 | 1.096 | 1.147 | 1.067 | 1.179 |
| 102210_at   | 0.438 | 0.982 | 0.943 | 0.982 | 0.981 |
| 102211_r_at | 0.474 | 1.020 | 1.018 | 0.991 | 1.023 |
| 102212_at   | 0.409 | 0.840 | 0.790 | 0.926 | 0.826 |
| 102213_at   | 0.245 | 0.852 | 0.871 | 0.959 | 0.835 |

|             |       |       |       |       |       |
|-------------|-------|-------|-------|-------|-------|
| 102214_at   | 0.122 | 1.002 | 0.829 | 0.924 | 0.921 |
| 102215_at   | 0.325 | 1.175 | 1.071 | 1.093 | 1.134 |
| 102216_at   | 0.302 | 0.895 | 0.897 | 1.005 | 0.852 |
| 102217_at   | 0.392 | 1.067 | 1.041 | 1.012 | 1.084 |
| 102218_at   | 0.159 | 0.955 | 0.990 | 0.967 | 1.021 |
| 102219_at   | 0.042 | 0.952 | 0.869 | 1.055 | 0.840 |
| 102220_at   | 0.452 | 0.891 | 0.911 | 0.944 | 0.859 |
| 102221_at   | 0.069 | 0.942 | 0.957 | 0.982 | 1.038 |
| 102222_at   | 0.256 | 1.227 | 1.223 | 0.976 | 1.279 |
| 102223_at   | 0.145 | 1.120 | 0.983 | 1.096 | 0.987 |
| 102224_at   | 0.257 | 1.222 | 1.052 | 1.057 | 1.091 |
| 102225_at   | 0.341 | 1.162 | 1.089 | 1.069 | 1.097 |
| 102226_at   | 0.182 | 0.901 | 0.888 | 1.019 | 0.824 |
| 102227_g_at | 0.124 | 0.923 | 0.841 | 1.205 | 0.913 |
| 102228_at   | 0.337 | 0.870 | 0.828 | 0.934 | 0.883 |
| 102229_at   | 0.413 | 0.901 | 0.910 | 0.979 | 0.896 |
| 102230_at   | 0.280 | 0.904 | 0.876 | 1.022 | 0.910 |
| 102231_at   | 0.264 | 0.913 | 1.001 | 0.989 | 0.907 |
| 102232_at   | 0.290 | 1.203 | 1.163 | 1.093 | 1.121 |
| 102233_at   | 0.394 | 1.042 | 0.983 | 0.960 | 0.966 |
| 102234_at   | 0.241 | 0.977 | 0.900 | 0.959 | 0.942 |
| 102235_at   | 0.356 | 1.297 | 1.348 | 1.311 | 1.225 |
| 102237_at   | 0.250 | 0.997 | 0.910 | 0.962 | 0.954 |
| 102238_at   | 0.378 | 0.749 | 0.767 | 0.863 | 0.777 |
| 102239_at   | 0.109 | 0.880 | 0.915 | 0.979 | 0.854 |
| 102240_at   | 0.207 | 0.926 | 0.946 | 0.948 | 0.959 |
| 102241_f_at | 0.428 | 0.905 | 0.854 | 0.947 | 0.889 |
| 102242_at   | 0.168 | 0.901 | 0.797 | 0.966 | 0.878 |
| 102243_at   | 0.474 | 0.870 | 0.868 | 0.895 | 0.892 |
| 102244_at   | 0.444 | 0.899 | 0.859 | 0.937 | 0.889 |
| 102247_at   | 0.185 | 0.948 | 0.967 | 1.041 | 0.994 |
| 102248_f_at | 0.259 | 1.220 | 1.165 | 1.045 | 1.272 |
| 102249_at   | 0.406 | 0.886 | 0.846 | 0.924 | 0.897 |
| 102250_at   | 0.426 | 0.993 | 0.953 | 1.033 | 0.997 |
| 102251_at   | 0.243 | 0.892 | 0.894 | 0.967 | 0.929 |
| 102252_at   | 0.297 | 1.154 | 1.182 | 1.050 | 1.195 |
| 102253_at   | 0.367 | 0.943 | 0.869 | 0.947 | 0.925 |
| 102254_f_at | 0.308 | 0.917 | 0.934 | 0.906 | 0.963 |
| 102255_at   | 0.420 | 1.244 | 1.341 | 1.066 | 1.291 |
| 102256_at   | 0.223 | 0.905 | 0.825 | 0.981 | 0.871 |
| 102257_at   | 0.194 | 0.839 | 0.866 | 0.934 | 0.881 |
| 102258_at   | 0.408 | 0.854 | 0.794 | 0.879 | 0.838 |
| 102259_at   | 0.150 | 0.767 | 0.918 | 1.051 | 0.915 |
| 102260_at   | 0.379 | 0.878 | 0.889 | 0.976 | 0.874 |
| 102261_f_at | 0.325 | 1.131 | 1.073 | 1.006 | 1.096 |
| 102262_r_at | 0.411 | 0.983 | 0.987 | 1.016 | 0.967 |
| 102263_at   | 0.313 | 0.994 | 1.046 | 1.043 | 1.043 |

|             |       |       |       |       |       |
|-------------|-------|-------|-------|-------|-------|
| 102264_at   | 0.251 | 0.972 | 0.935 | 0.956 | 1.077 |
| 102265_at   | 0.375 | 0.860 | 0.836 | 0.947 | 0.842 |
| 102266_at   | 0.160 | 0.836 | 0.802 | 0.896 | 0.828 |
| 102267_at   | 0.496 | 0.863 | 0.834 | 0.888 | 0.850 |
| 102268_at   | 0.267 | 0.920 | 0.848 | 0.946 | 0.831 |
| 102269_at   | 0.094 | 0.865 | 1.045 | 0.968 | 0.872 |
| 102271_at   | 0.417 | 1.117 | 1.070 | 1.079 | 1.087 |
| 102272_at   | 0.391 | 0.854 | 0.869 | 0.869 | 0.860 |
| 102273_at   | 0.179 | 0.876 | 0.907 | 0.955 | 0.969 |
| 102274_at   | 0.191 | 0.904 | 0.996 | 0.922 | 0.921 |
| 102275_at   | 0.194 | 0.899 | 0.822 | 0.980 | 0.854 |
| 102277_at   | 0.077 | 0.972 | 1.092 | 1.103 | 1.174 |
| 102278_at   | 0.059 | 0.960 | 0.960 | 0.889 | 1.003 |
| 102279_at   | 0.390 | 1.000 | 1.045 | 0.947 | 1.038 |
| 102280_at   | 0.418 | 0.933 | 0.946 | 0.980 | 0.937 |
| 102281_at   | 0.488 | 0.752 | 0.752 | 0.822 | 0.721 |
| 102282_g_at | 0.456 | 0.924 | 0.913 | 0.915 | 0.947 |
| 102283_at   | 0.274 | 1.217 | 1.178 | 1.056 | 1.151 |
| 102284_at   | 0.299 | 1.034 | 1.015 | 1.082 | 0.989 |
| 102285_at   | 0.278 | 0.974 | 0.901 | 0.991 | 0.932 |
| 102286_at   | 0.292 | 1.115 | 1.070 | 1.045 | 1.040 |
| 102287_at   | 0.253 | 0.772 | 0.778 | 0.815 | 0.849 |
| 102288_at   | 0.321 | 0.913 | 0.877 | 0.972 | 0.898 |
| 102289_r_at | 0.484 | 0.982 | 0.989 | 0.983 | 0.991 |
| 102290_at   | 0.348 | 0.911 | 0.901 | 0.976 | 0.872 |
| 102291_at   | 0.219 | 0.867 | 0.863 | 0.940 | 0.918 |
| 102292_at   | 0.091 | 1.060 | 1.100 | 0.990 | 1.121 |
| 102293_at   | 0.330 | 0.846 | 0.886 | 0.938 | 0.926 |
| 102294_at   | 0.330 | 0.847 | 0.812 | 0.885 | 0.812 |
| 102295_at   | 0.297 | 0.984 | 0.939 | 1.064 | 0.989 |
| 102296_at   | 0.318 | 0.847 | 0.851 | 0.956 | 0.814 |
| 102297_at   | 0.123 | 1.085 | 0.972 | 1.020 | 0.967 |
| 102298_at   | 0.293 | 0.905 | 0.845 | 0.969 | 0.911 |
| 102299_at   | 0.502 | 1.025 | 1.016 | 1.003 | 1.025 |
| 102300_at   | 0.359 | 0.889 | 0.900 | 0.985 | 0.922 |
| 102301_at   | 0.505 | 0.980 | 0.960 | 0.982 | 0.959 |
| 102302_at   | 0.349 | 1.112 | 1.082 | 1.325 | 1.108 |
| 102303_i_at | 0.392 | 0.847 | 0.825 | 0.903 | 0.830 |
| 102304_f_at | 0.272 | 0.922 | 0.859 | 0.893 | 0.919 |
| 102305_at   | 0.344 | 0.866 | 0.826 | 0.926 | 0.841 |
| 102306_at   | 0.069 | 1.045 | 1.061 | 1.007 | 1.267 |
| 102307_at   | 0.337 | 0.891 | 0.904 | 0.956 | 0.958 |
| 102308_at   | 0.127 | 1.011 | 0.901 | 0.990 | 0.868 |
| 102309_at   | 0.232 | 1.133 | 1.033 | 1.091 | 1.060 |
| 102310_at   | 0.282 | 0.938 | 1.018 | 0.979 | 1.015 |
| 102311_at   | 0.504 | 0.902 | 0.877 | 0.945 | 0.872 |
| 102312_r_at | 0.477 | 0.832 | 0.796 | 0.913 | 0.797 |



|             |       |       |       |       |       |
|-------------|-------|-------|-------|-------|-------|
| 102313_at   | 0.206 | 0.926 | 1.053 | 0.942 | 1.024 |
| 102314_at   | 0.199 | 0.862 | 0.768 | 1.195 | 0.767 |
| 102315_at   | 0.379 | 1.176 | 1.416 | 1.132 | 1.330 |
| 102316_at   | 0.392 | 0.998 | 1.036 | 0.999 | 1.018 |
| 102317_at   | 0.436 | 1.146 | 1.127 | 1.079 | 1.117 |
| 102318_at   | 0.076 | 1.463 | 1.524 | 0.940 | 1.387 |
| 102319_at   | 0.328 | 0.915 | 1.068 | 0.996 | 0.987 |
| 102320_at   | 0.403 | 1.105 | 1.127 | 1.029 | 1.092 |
| 102321_at   | 0.250 | 1.262 | 1.104 | 1.189 | 1.063 |
| 102322_at   | 0.322 | 1.304 | 1.239 | 1.200 | 1.188 |
| 102323_at   | 0.349 | 0.934 | 0.877 | 0.972 | 0.926 |
| 102324_at   | 0.339 | 0.885 | 0.910 | 0.890 | 0.925 |
| 102326_at   | 0.050 | 1.075 | 1.293 | 0.983 | 1.407 |
| 102327_at   | 0.249 | 0.903 | 1.013 | 1.336 | 0.885 |
| 102328_at   | 0.350 | 1.063 | 1.134 | 1.008 | 1.124 |
| 102329_at   | 0.357 | 1.010 | 0.988 | 1.078 | 1.020 |
| 102330_at   | 0.094 | 0.940 | 1.104 | 0.889 | 1.085 |
| 102331_at   | 0.193 | 1.195 | 1.075 | 1.048 | 1.068 |
| 102332_at   | 0.346 | 1.077 | 0.992 | 1.020 | 1.018 |
| 102333_at   | 0.119 | 1.093 | 1.001 | 0.985 | 0.937 |
| 102334_at   | 0.105 | 0.910 | 1.009 | 0.914 | 0.951 |
| 102335_at   | 0.396 | 0.938 | 0.949 | 0.947 | 0.973 |
| 102336_at   | 0.377 | 1.386 | 1.276 | 1.278 | 1.322 |
| 102337_s_at | 0.016 | 1.170 | 3.255 | 1.101 | 1.737 |
| 102338_at   | 0.438 | 0.970 | 0.927 | 0.916 | 0.972 |
| 102340_at   | 0.285 | 1.065 | 1.021 | 0.982 | 1.014 |
| 102341_at   | 0.465 | 0.904 | 0.926 | 0.896 | 0.920 |
| 102342_at   | 0.330 | 0.920 | 0.894 | 0.931 | 0.943 |
| 102343_at   | 0.328 | 0.927 | 0.925 | 0.980 | 0.966 |
| 102344_s_at | 0.220 | 1.111 | 1.000 | 1.019 | 1.034 |
| 102345_at   | 0.420 | 0.920 | 0.950 | 0.976 | 0.910 |
| 102346_at   | 0.302 | 1.193 | 1.141 | 1.128 | 1.077 |
| 102348_at   | 0.437 | 1.246 | 1.251 | 0.896 | 1.404 |
| 102349_at   | 0.303 | 0.854 | 0.854 | 0.949 | 0.894 |
| 102350_at   | 0.095 | 0.995 | 0.897 | 0.928 | 0.944 |
| 102351_at   | 0.293 | 0.944 | 0.942 | 1.069 | 0.979 |
| 102352_at   | 0.223 | 0.896 | 0.891 | 0.986 | 0.959 |
| 102353_at   | 0.120 | 1.154 | 1.526 | 1.096 | 1.585 |
| 102354_at   | 0.075 | 0.937 | 1.137 | 0.975 | 1.073 |
| 102356_at   | 0.323 | 1.164 | 1.086 | 1.078 | 1.108 |
| 102357_at   | 0.189 | 1.023 | 0.956 | 1.044 | 0.965 |
| 102360_at   | 0.490 | 1.161 | 1.185 | 1.092 | 1.271 |
| 102362_i_at | 0.207 | 1.062 | 1.112 | 0.999 | 0.930 |
| 102363_r_at | 0.072 | 0.983 | 1.020 | 1.001 | 0.877 |
| 102364_at   | 0.058 | 1.107 | 1.057 | 1.059 | 0.923 |
| 102366_at   | 0.295 | 0.746 | 0.646 | 1.503 | 0.676 |
| 102368_at   | 0.390 | 1.102 | 1.106 | 1.008 | 1.116 |

|             |       |       |       |       |       |
|-------------|-------|-------|-------|-------|-------|
| 102370_at   | 0.256 | 1.316 | 1.167 | 1.066 | 1.218 |
| 102371_at   | 0.380 | 1.041 | 1.024 | 1.100 | 0.989 |
| 102372_at   | 0.003 | 1.902 | 4.308 | 1.035 | 1.391 |
| 102373_at   | 0.216 | 1.092 | 1.383 | 0.975 | 1.226 |
| 102374_at   | 0.219 | 1.205 | 1.086 | 1.033 | 1.184 |
| 102375_at   | 0.304 | 0.912 | 0.861 | 0.942 | 0.899 |
| 102376_r_at | 0.228 | 0.857 | 0.802 | 0.954 | 0.806 |
| 102378_at   | 0.279 | 1.261 | 1.119 | 1.198 | 1.160 |
| 102379_at   | 0.094 | 1.218 | 1.065 | 0.965 | 1.099 |
| 102380_s_at | 0.488 | 0.842 | 0.796 | 0.856 | 0.820 |
| 102381_at   | 0.093 | 1.446 | 1.987 | 1.131 | 1.678 |
| 102382_at   | 0.504 | 0.978 | 0.971 | 0.963 | 1.012 |
| 102383_at   | 0.250 | 1.021 | 0.984 | 1.020 | 0.944 |
| 102384_at   | 0.140 | 1.546 | 1.205 | 1.062 | 1.252 |
| 102385_at   | 0.282 | 0.951 | 0.950 | 0.997 | 0.977 |
| 102387_at   | 0.264 | 1.125 | 1.147 | 1.038 | 1.164 |
| 102389_s_at | 0.212 | 1.142 | 0.983 | 1.046 | 1.102 |
| 102393_at   | 0.474 | 0.862 | 0.811 | 0.912 | 0.837 |
| 102395_at   | 0.194 | 1.124 | 1.017 | 1.096 | 1.142 |
| 102396_at   | 0.492 | 0.955 | 0.936 | 0.941 | 0.926 |
| 102397_at   | 0.230 | 1.015 | 0.759 | 0.887 | 0.930 |
| 102398_at   | 0.417 | 1.009 | 0.985 | 0.993 | 0.971 |
| 102399_at   | 0.245 | 1.095 | 1.015 | 1.100 | 1.060 |
| 102400_at   | 0.165 | 1.038 | 1.057 | 0.956 | 1.038 |
| 102401_at   | 0.145 | 1.224 | 1.178 | 1.040 | 1.094 |
| 102402_at   | 0.328 | 1.054 | 1.091 | 1.077 | 1.039 |
| 102403_at   | 0.470 | 0.905 | 0.918 | 0.935 | 0.921 |
| 102404_at   | 0.211 | 0.928 | 0.899 | 0.852 | 0.879 |
| 102405_at   | 0.405 | 0.898 | 0.875 | 0.949 | 0.894 |
| 102406_at   | 0.359 | 0.990 | 0.927 | 0.965 | 0.903 |
| 102407_at   | 0.218 | 1.087 | 1.499 | 1.319 | 1.185 |
| 102408_g_at | 0.239 | 0.840 | 0.903 | 0.938 | 0.892 |
| 102409_at   | 0.249 | 1.041 | 1.092 | 0.928 | 1.116 |
| 102410_at   | 0.070 | 1.019 | 0.940 | 1.010 | 0.859 |
| 102411_at   | 0.415 | 0.954 | 0.926 | 0.978 | 0.938 |
| 102412_at   | 0.271 | 0.965 | 0.945 | 0.943 | 0.982 |
| 102413_at   | 0.332 | 0.860 | 0.848 | 0.951 | 0.884 |
| 102414_i_at | 0.256 | 0.950 | 1.158 | 0.811 | 0.976 |
| 102415_r_at | 0.289 | 0.985 | 1.070 | 0.872 | 0.980 |
| 102416_at   | 0.274 | 0.855 | 0.829 | 0.939 | 0.873 |
| 102418_at   | 0.350 | 0.880 | 0.793 | 0.912 | 0.799 |
| 102419_at   | 0.036 | 1.059 | 0.921 | 1.120 | 0.834 |
| 102421_at   | 0.263 | 1.002 | 1.007 | 1.052 | 0.983 |
| 102423_at   | 0.477 | 1.021 | 1.032 | 1.015 | 1.018 |
| 102424_at   | 0.247 | 0.885 | 0.923 | 0.952 | 0.946 |
| 102425_at   | 0.504 | 1.219 | 1.262 | 1.122 | 1.252 |
| 102426_at   | 0.189 | 0.965 | 0.824 | 1.034 | 0.872 |

|             |       |       |       |       |       |
|-------------|-------|-------|-------|-------|-------|
| 102427_at   | 0.452 | 1.065 | 1.053 | 0.991 | 1.126 |
| 102429_at   | 0.474 | 0.850 | 0.852 | 0.907 | 0.857 |
| 102430_at   | 0.106 | 1.014 | 1.063 | 0.966 | 1.017 |
| 102431_at   | 0.035 | 1.228 | 0.912 | 0.872 | 0.992 |
| 102476_f_at | 0.190 | 1.253 | 1.176 | 1.015 | 1.123 |
| 102477_at   | 0.292 | 0.833 | 0.803 | 0.951 | 0.848 |
| 102478_f_at | 0.341 | 0.910 | 0.871 | 0.924 | 0.897 |
| 102552_at   | 0.331 | 0.833 | 0.780 | 0.859 | 0.846 |
| 102553_at   | 0.282 | 0.864 | 1.078 | 0.898 | 0.840 |
| 102554_at   | 0.448 | 0.907 | 0.869 | 0.910 | 0.899 |
| 102555_at   | 0.486 | 0.862 | 0.848 | 0.903 | 0.867 |
| 102556_at   | 0.138 | 0.836 | 1.156 | 0.912 | 0.882 |
| 102557_at   | 0.331 | 0.950 | 0.892 | 0.971 | 0.950 |
| 102558_at   | 0.309 | 0.781 | 0.843 | 0.924 | 0.851 |
| 102559_at   | 0.477 | 0.981 | 0.930 | 1.015 | 0.968 |
| 102560_at   | 0.337 | 0.863 | 0.792 | 0.933 | 0.888 |
| 102561_at   | 0.507 | 0.972 | 0.966 | 0.958 | 0.984 |
| 102562_at   | 0.428 | 0.957 | 0.971 | 1.007 | 0.932 |
| 102566_at   | 0.421 | 0.891 | 0.871 | 0.948 | 0.849 |
| 102567_at   | 0.422 | 0.855 | 0.841 | 0.908 | 0.881 |
| 102568_at   | 0.302 | 0.892 | 0.933 | 0.943 | 0.911 |
| 102569_at   | 0.500 | 0.820 | 0.796 | 0.856 | 0.795 |
| 102570_at   | 0.401 | 0.929 | 0.873 | 0.966 | 0.919 |
| 102571_at   | 0.283 | 0.952 | 0.847 | 0.951 | 0.957 |
| 102572_at   | 0.335 | 0.975 | 0.937 | 1.005 | 0.981 |
| 102573_at   | 0.324 | 0.878 | 0.874 | 0.932 | 0.865 |
| 102574_at   | 0.315 | 0.818 | 0.772 | 0.933 | 0.834 |
| 102575_at   | 0.227 | 0.861 | 0.819 | 0.935 | 0.835 |
| 102576_at   | 0.492 | 0.905 | 0.846 | 0.937 | 0.883 |
| 102577_at   | 0.484 | 0.914 | 0.884 | 0.906 | 0.872 |
| 102578_at   | 0.452 | 0.902 | 0.859 | 0.962 | 0.860 |
| 102579_f_at | 0.296 | 1.013 | 0.954 | 0.974 | 0.938 |
| 102580_r_at | 0.458 | 0.874 | 0.915 | 0.934 | 0.864 |
| 102581_at   | 0.392 | 0.847 | 0.804 | 0.883 | 0.803 |
| 102582_at   | 0.497 | 0.867 | 0.811 | 0.887 | 0.842 |
| 102583_at   | 0.496 | 0.909 | 0.891 | 0.937 | 0.892 |
| 102584_at   | 0.261 | 0.820 | 0.816 | 0.911 | 0.812 |
| 102585_f_at | 0.026 | 1.146 | 3.073 | 0.847 | 1.020 |
| 102586_at   | 0.341 | 0.887 | 0.887 | 0.959 | 0.852 |
| 102599_at   | 0.176 | 0.947 | 0.978 | 1.007 | 0.977 |
| 102612_at   | 0.484 | 0.872 | 0.831 | 0.889 | 0.828 |
| 102613_at   | 0.484 | 0.891 | 0.874 | 0.928 | 0.894 |
| 102614_at   | 0.454 | 0.912 | 0.871 | 0.905 | 0.849 |
| 102619_at   | 0.474 | 0.852 | 0.873 | 0.926 | 0.843 |
| 102620_at   | 0.345 | 0.803 | 0.815 | 0.912 | 0.812 |
| 102621_at   | 0.444 | 0.845 | 0.807 | 0.893 | 0.802 |
| 102622_r_at | 0.494 | 0.880 | 0.847 | 0.920 | 0.836 |

|             |       |       |       |       |       |
|-------------|-------|-------|-------|-------|-------|
| 102623_at   | 0.412 | 1.045 | 1.040 | 1.079 | 1.040 |
| 102624_at   | 0.440 | 0.843 | 0.838 | 0.910 | 0.849 |
| 102625_f_at | 0.461 | 1.021 | 0.998 | 1.018 | 1.018 |
| 102626_r_at | 0.500 | 0.998 | 0.998 | 0.969 | 0.998 |
| 102627_at   | 0.423 | 0.998 | 0.967 | 0.983 | 0.950 |
| 102628_at   | 0.321 | 0.922 | 0.864 | 0.992 | 0.918 |
| 102629_at   | 0.298 | 0.869 | 0.865 | 0.967 | 0.862 |
| 102630_s_at | 0.461 | 0.831 | 0.814 | 0.895 | 0.808 |
| 102631_at   | 0.444 | 0.932 | 0.893 | 0.947 | 0.922 |
| 102632_at   | 0.100 | 0.907 | 0.897 | 0.919 | 1.040 |
| 102633_at   | 0.257 | 0.842 | 0.754 | 0.897 | 0.845 |
| 102635_at   | 0.193 | 0.902 | 0.956 | 0.948 | 0.972 |
| 102636_at   | 0.183 | 0.888 | 0.852 | 0.994 | 0.852 |
| 102637_at   | 0.108 | 0.791 | 0.811 | 0.995 | 0.826 |
| 102638_at   | 0.231 | 0.930 | 0.991 | 0.938 | 0.984 |
| 102639_at   | 0.124 | 1.092 | 1.122 | 1.214 | 1.061 |
| 102640_at   | 0.268 | 0.909 | 0.841 | 0.976 | 0.909 |
| 102641_at   | 0.150 | 0.949 | 1.132 | 0.926 | 1.084 |
| 102642_at   | 0.188 | 0.988 | 0.927 | 0.978 | 0.961 |
| 102643_at   | 0.231 | 0.909 | 0.870 | 1.002 | 0.914 |
| 102644_at   | 0.315 | 1.206 | 1.289 | 1.001 | 1.320 |
| 102645_at   | 0.377 | 1.120 | 1.049 | 1.036 | 1.140 |
| 102646_at   | 0.452 | 1.136 | 1.091 | 1.052 | 1.122 |
| 102647_g_at | 0.265 | 1.178 | 1.108 | 1.009 | 1.208 |
| 102648_at   | 0.483 | 0.955 | 0.945 | 0.977 | 0.913 |
| 102649_s_at | 0.091 | 0.793 | 0.747 | 0.852 | 0.788 |
| 102650_at   | 0.159 | 0.919 | 0.818 | 0.938 | 0.886 |
| 102651_at   | 0.353 | 0.878 | 0.825 | 0.923 | 0.861 |
| 102652_at   | 0.323 | 0.843 | 0.798 | 0.932 | 0.858 |
| 102653_at   | 0.346 | 0.990 | 0.917 | 1.066 | 0.907 |
| 102654_at   | 0.408 | 0.931 | 0.918 | 0.957 | 0.907 |
| 102655_at   | 0.189 | 0.972 | 1.033 | 1.002 | 1.050 |
| 102656_at   | 0.383 | 0.970 | 0.965 | 0.997 | 1.002 |
| 102657_at   | 0.229 | 1.001 | 0.967 | 0.944 | 0.874 |
| 102658_at   | 0.495 | 0.877 | 0.877 | 0.919 | 0.872 |
| 102659_at   | 0.107 | 0.976 | 1.062 | 1.045 | 1.003 |
| 102660_at   | 0.470 | 0.895 | 0.910 | 0.945 | 0.902 |
| 102661_at   | 0.154 | 0.915 | 1.085 | 0.911 | 0.990 |
| 102662_at   | 0.499 | 0.882 | 0.824 | 0.908 | 0.832 |
| 102663_at   | 0.258 | 1.116 | 1.218 | 1.069 | 1.316 |
| 102664_at   | 0.386 | 0.867 | 0.792 | 0.931 | 0.883 |
| 102665_at   | 0.348 | 0.821 | 0.753 | 0.879 | 0.760 |
| 102666_at   | 0.434 | 0.944 | 0.893 | 0.919 | 0.909 |
| 102667_at   | 0.206 | 1.004 | 0.908 | 0.956 | 0.928 |
| 102668_at   | 0.124 | 0.939 | 0.876 | 1.017 | 0.896 |
| 102669_at   | 0.378 | 0.873 | 0.896 | 0.953 | 0.871 |
| 102670_at   | 0.271 | 1.149 | 1.089 | 1.037 | 1.096 |

|             |       |       |       |       |       |
|-------------|-------|-------|-------|-------|-------|
| 102671_at   | 0.188 | 0.843 | 0.844 | 0.959 | 0.884 |
| 102672_g_at | 0.441 | 0.907 | 0.863 | 0.954 | 0.887 |
| 102673_at   | 0.441 | 0.899 | 0.878 | 0.918 | 0.916 |
| 102674_at   | 0.425 | 1.057 | 1.061 | 1.029 | 1.059 |
| 102675_at   | 0.461 | 0.922 | 0.876 | 0.948 | 0.866 |
| 102676_at   | 0.086 | 0.887 | 0.929 | 0.992 | 0.949 |
| 102677_at   | 0.159 | 1.047 | 0.960 | 0.960 | 0.870 |
| 102678_at   | 0.507 | 0.980 | 0.984 | 0.992 | 0.982 |
| 102679_at   | 0.444 | 0.838 | 0.841 | 0.918 | 0.828 |
| 102680_g_at | 0.312 | 0.799 | 0.805 | 0.883 | 0.820 |
| 102681_at   | 0.495 | 0.925 | 0.903 | 0.959 | 0.902 |
| 102682_at   | 0.441 | 0.898 | 0.906 | 0.944 | 0.862 |
| 102683_at   | 0.297 | 0.873 | 0.823 | 0.930 | 0.893 |
| 102684_at   | 0.409 | 0.957 | 0.974 | 1.012 | 0.998 |
| 102685_at   | 0.325 | 0.879 | 0.831 | 0.947 | 0.882 |
| 102686_at   | 0.284 | 0.927 | 0.855 | 0.944 | 0.866 |
| 102687_at   | 0.411 | 0.883 | 0.894 | 0.897 | 0.919 |
| 102688_f_at | 0.459 | 0.978 | 0.965 | 1.009 | 0.991 |
| 102689_at   | 0.276 | 0.851 | 1.022 | 0.972 | 0.984 |
| 102690_at   | 0.441 | 0.850 | 0.844 | 0.891 | 0.875 |
| 102691_at   | 0.120 | 0.903 | 0.988 | 1.059 | 0.968 |
| 102692_s_at | 0.295 | 0.925 | 0.870 | 0.907 | 0.950 |
| 102693_f_at | 0.249 | 0.901 | 0.969 | 0.970 | 0.887 |
| 102694_at   | 0.417 | 0.968 | 0.926 | 0.946 | 0.942 |
| 102695_at   | 0.415 | 0.895 | 0.857 | 0.944 | 0.886 |
| 102696_s_at | 0.251 | 0.822 | 0.954 | 1.017 | 1.133 |
| 102697_at   | 0.207 | 0.820 | 0.857 | 0.963 | 0.904 |
| 102698_at   | 0.064 | 0.745 | 0.816 | 1.237 | 0.780 |
| 102699_at   | 0.181 | 0.851 | 0.809 | 0.879 | 0.875 |
| 102700_at   | 0.486 | 0.853 | 0.801 | 0.876 | 0.801 |
| 102701_at   | 0.055 | 1.057 | 0.849 | 0.944 | 0.860 |
| 102702_at   | 0.220 | 1.094 | 1.011 | 0.987 | 0.981 |
| 102703_s_at | 0.247 | 0.870 | 0.744 | 1.004 | 0.789 |
| 102704_at   | 0.148 | 0.841 | 0.642 | 1.025 | 0.725 |
| 102705_at   | 0.254 | 0.858 | 0.834 | 0.910 | 0.906 |
| 102706_i_at | 0.312 | 1.036 | 1.028 | 1.014 | 0.984 |
| 102707_f_at | 0.033 | 0.882 | 1.346 | 1.051 | 1.021 |
| 102708_at   | 0.415 | 0.920 | 0.933 | 0.993 | 0.978 |
| 102709_at   | 0.448 | 0.903 | 0.892 | 0.956 | 0.895 |
| 102710_at   | 0.155 | 1.214 | 1.485 | 0.946 | 1.471 |
| 102711_at   | 0.330 | 0.931 | 0.914 | 0.944 | 0.978 |
| 102712_at   | 0.035 | 2.906 | 6.462 | 2.118 | 3.944 |
| 102713_at   | 0.331 | 0.875 | 0.845 | 0.948 | 0.901 |
| 102714_at   | 0.261 | 0.905 | 0.837 | 0.966 | 0.888 |
| 102715_at   | 0.348 | 0.987 | 0.970 | 1.013 | 0.945 |
| 102716_at   | 0.375 | 0.846 | 0.826 | 0.904 | 0.877 |
| 102717_at   | 0.347 | 0.931 | 0.937 | 0.983 | 0.936 |

|             |       |       |       |       |       |
|-------------|-------|-------|-------|-------|-------|
| 102718_at   | 0.161 | 0.996 | 1.214 | 0.992 | 1.105 |
| 102719_f_at | 0.146 | 0.888 | 1.196 | 0.901 | 0.956 |
| 102720_at   | 0.294 | 1.144 | 1.049 | 1.001 | 1.053 |
| 102721_at   | 0.438 | 0.892 | 0.899 | 0.900 | 0.835 |
| 102722_g_at | 0.249 | 0.976 | 1.046 | 0.973 | 0.980 |
| 102723_at   | 0.496 | 0.962 | 0.933 | 0.990 | 0.919 |
| 102724_at   | 0.399 | 1.044 | 1.019 | 1.049 | 1.066 |
| 102725_at   | 0.390 | 0.960 | 0.944 | 1.022 | 0.920 |
| 102726_at   | 0.222 | 0.966 | 0.953 | 0.938 | 0.983 |
| 102727_at   | 0.229 | 1.212 | 1.011 | 0.790 | 1.179 |
| 102728_f_at | 0.391 | 0.905 | 0.855 | 0.928 | 0.863 |
| 102729_f_at | 0.508 | 0.884 | 0.881 | 0.906 | 0.879 |
| 102730_at   | 0.467 | 0.883 | 0.872 | 0.882 | 0.868 |
| 102731_g_at | 0.246 | 0.936 | 0.955 | 0.886 | 0.920 |
| 102732_at   | 0.346 | 0.936 | 0.947 | 0.941 | 0.977 |
| 102733_at   | 0.448 | 0.950 | 0.914 | 0.973 | 0.941 |
| 102734_at   | 0.281 | 1.086 | 1.120 | 0.946 | 1.059 |
| 102735_at   | 0.196 | 0.929 | 0.839 | 0.966 | 0.863 |
| 102736_at   | 0.016 | 1.056 | 2.362 | 1.053 | 1.107 |
| 102737_at   | 0.371 | 1.272 | 1.113 | 1.223 | 1.175 |
| 102738_s_at | 0.367 | 0.969 | 0.933 | 1.009 | 1.042 |
| 102739_s_at | 0.463 | 0.874 | 0.832 | 0.927 | 0.851 |
| 102740_at   | 0.291 | 1.000 | 0.954 | 0.975 | 0.958 |
| 102741_at   | 0.454 | 0.913 | 0.845 | 0.939 | 0.899 |
| 102742_g_at | 0.136 | 1.097 | 0.858 | 0.986 | 0.931 |
| 102743_at   | 0.196 | 1.002 | 0.947 | 1.016 | 0.929 |
| 102744_at   | 0.188 | 0.792 | 0.877 | 0.858 | 0.872 |
| 102745_at   | 0.278 | 0.883 | 0.916 | 0.917 | 0.975 |
| 102746_at   | 0.427 | 0.816 | 0.785 | 0.891 | 0.784 |
| 102747_at   | 0.304 | 0.976 | 0.909 | 0.960 | 0.911 |
| 102748_at   | 0.183 | 0.973 | 0.947 | 0.987 | 0.906 |
| 102749_at   | 0.345 | 0.709 | 0.624 | 1.029 | 0.697 |
| 102750_at   | 0.072 | 1.102 | 1.013 | 1.112 | 0.978 |
| 102751_at   | 0.264 | 1.097 | 1.019 | 1.078 | 1.106 |
| 102752_at   | 0.379 | 1.358 | 1.369 | 1.099 | 1.392 |
| 102753_at   | 0.405 | 0.885 | 0.918 | 0.886 | 0.858 |
| 102754_at   | 0.220 | 1.217 | 1.067 | 1.034 | 1.111 |
| 102755_at   | 0.026 | 1.051 | 3.192 | 1.037 | 1.038 |
| 102758_at   | 0.336 | 1.084 | 1.031 | 1.011 | 1.051 |
| 102759_at   | 0.216 | 0.981 | 0.918 | 0.934 | 0.895 |
| 102761_at   | 0.276 | 1.032 | 1.086 | 0.991 | 1.119 |
| 102762_r_at | 0.413 | 0.904 | 0.885 | 0.961 | 0.920 |
| 102763_at   | 0.250 | 0.777 | 0.786 | 1.168 | 0.697 |
| 102764_at   | 0.350 | 0.947 | 0.874 | 0.962 | 0.915 |
| 102765_at   | 0.510 | 0.911 | 0.896 | 0.924 | 0.890 |
| 102766_at   | 0.467 | 0.992 | 1.004 | 0.993 | 0.979 |
| 102767_at   | 0.371 | 1.147 | 1.163 | 1.093 | 1.245 |

|             |       |       |       |       |       |
|-------------|-------|-------|-------|-------|-------|
| 102768_i_at | 0.458 | 1.029 | 1.066 | 1.016 | 1.157 |
| 102769_f_at | 0.315 | 1.072 | 1.016 | 0.963 | 1.015 |
| 102770_at   | 0.427 | 1.000 | 0.934 | 1.014 | 0.974 |
| 102771_at   | 0.146 | 1.024 | 0.932 | 0.966 | 0.982 |
| 102772_at   | 0.247 | 0.991 | 0.984 | 1.028 | 0.935 |
| 102773_at   | 0.181 | 1.100 | 1.195 | 0.984 | 1.135 |
| 102774_at   | 0.328 | 0.960 | 0.947 | 1.052 | 0.974 |
| 102776_at   | 0.200 | 1.041 | 1.072 | 0.934 | 1.105 |
| 102777_at   | 0.415 | 0.823 | 0.798 | 0.824 | 0.749 |
| 102778_at   | 0.035 | 0.634 | 0.841 | 0.662 | 0.611 |
| 102779_at   | 0.154 | 0.958 | 0.850 | 0.926 | 0.962 |
| 102780_at   | 0.245 | 0.901 | 0.816 | 0.881 | 0.848 |
| 102781_at   | 0.283 | 1.214 | 1.095 | 0.971 | 1.147 |
| 102782_at   | 0.325 | 1.072 | 1.028 | 1.024 | 1.032 |
| 102783_at   | 0.189 | 0.935 | 0.867 | 0.989 | 0.905 |
| 102784_at   | 0.163 | 1.130 | 1.153 | 1.066 | 1.035 |
| 102785_at   | 0.198 | 0.942 | 0.892 | 0.998 | 0.903 |
| 102786_at   | 0.177 | 1.375 | 1.405 | 1.047 | 1.403 |
| 102787_at   | 0.369 | 1.109 | 1.051 | 1.106 | 1.065 |
| 102788_s_at | 0.417 | 0.890 | 0.862 | 0.922 | 0.876 |
| 102789_at   | 0.449 | 1.098 | 0.998 | 1.064 | 1.134 |
| 102790_at   | 0.359 | 1.028 | 1.050 | 1.008 | 1.074 |
| 102791_at   | 0.058 | 1.082 | 1.418 | 0.916 | 1.268 |
| 102792_at   | 0.440 | 0.907 | 0.938 | 0.928 | 0.908 |
| 102793_at   | 0.305 | 0.908 | 0.874 | 0.928 | 0.910 |
| 102794_at   | 0.456 | 1.246 | 1.297 | 1.100 | 1.239 |
| 102795_at   | 0.188 | 0.894 | 0.796 | 0.966 | 0.893 |
| 102796_at   | 0.372 | 0.910 | 0.926 | 0.869 | 0.913 |
| 102797_at   | 0.405 | 0.974 | 0.897 | 0.936 | 0.913 |
| 102798_at   | 0.083 | 1.027 | 0.947 | 0.981 | 1.110 |
| 102799_at   | 0.167 | 0.931 | 0.960 | 0.898 | 0.974 |
| 102800_at   | 0.377 | 0.929 | 0.908 | 0.985 | 0.896 |
| 102801_at   | 0.096 | 0.910 | 0.826 | 0.965 | 0.919 |
| 102802_at   | 0.137 | 0.969 | 0.857 | 0.914 | 1.078 |
| 102803_at   | 0.201 | 0.933 | 0.908 | 1.006 | 0.927 |
| 102804_at   | 0.092 | 0.925 | 0.933 | 1.055 | 0.977 |
| 102805_at   | 0.182 | 0.900 | 0.967 | 1.084 | 0.935 |
| 102806_g_at | 0.191 | 0.901 | 1.016 | 1.126 | 0.934 |
| 102807_at   | 0.174 | 1.045 | 0.964 | 1.053 | 1.097 |
| 102808_at   | 0.019 | 1.095 | 1.038 | 1.255 | 0.989 |
| 102809_s_at | 0.125 | 0.813 | 1.026 | 0.787 | 0.906 |
| 102811_at   | 0.465 | 1.087 | 1.118 | 1.111 | 1.139 |
| 102812_i_at | 0.144 | 1.107 | 1.122 | 1.035 | 0.948 |
| 102813_f_at | 0.188 | 1.076 | 1.207 | 0.993 | 1.110 |
| 102814_f_at | 0.398 | 0.867 | 0.824 | 0.905 | 0.878 |
| 102815_at   | 0.108 | 1.386 | 1.277 | 1.237 | 1.182 |
| 102816_at   | 0.505 | 0.960 | 0.958 | 0.992 | 0.959 |

|             |       |       |       |       |       |
|-------------|-------|-------|-------|-------|-------|
| 102817_at   | 0.298 | 0.942 | 0.842 | 0.938 | 0.873 |
| 102818_at   | 0.187 | 0.862 | 0.896 | 0.743 | 1.552 |
| 102819_at   | 0.279 | 0.922 | 0.876 | 0.939 | 0.913 |
| 102820_at   | 0.352 | 0.945 | 0.918 | 0.980 | 0.959 |
| 102821_s_at | 0.210 | 1.097 | 1.237 | 0.968 | 1.091 |
| 102822_at   | 0.330 | 0.887 | 0.837 | 0.885 | 0.883 |
| 102823_at   | 0.244 | 0.998 | 1.131 | 0.973 | 0.910 |
| 102824_g_at | 0.233 | 1.096 | 1.232 | 1.060 | 0.977 |
| 102825_at   | 0.388 | 0.915 | 0.842 | 0.884 | 0.862 |
| 102826_at   | 0.219 | 0.994 | 0.915 | 1.031 | 0.976 |
| 102827_at   | 0.306 | 1.187 | 1.169 | 1.133 | 1.073 |
| 102828_at   | 0.293 | 0.954 | 0.892 | 0.959 | 0.921 |
| 102829_s_at | 0.377 | 0.968 | 0.884 | 0.939 | 0.919 |
| 102830_at   | 0.216 | 0.947 | 0.891 | 0.952 | 0.972 |
| 102831_s_at | 0.309 | 0.872 | 0.946 | 0.932 | 0.937 |
| 102832_at   | 0.390 | 0.947 | 0.899 | 1.006 | 0.923 |
| 102833_at   | 0.205 | 0.909 | 0.867 | 0.962 | 0.886 |
| 102834_at   | 0.370 | 1.034 | 1.030 | 0.982 | 1.000 |
| 102835_at   | 0.328 | 1.012 | 1.092 | 1.044 | 1.039 |
| 102836_at   | 0.140 | 1.202 | 1.102 | 0.994 | 1.132 |
| 102838_at   | 0.347 | 0.815 | 0.851 | 0.901 | 0.888 |
| 102839_at   | 0.016 | 1.021 | 1.042 | 1.119 | 0.917 |
| 102840_at   | 0.419 | 0.948 | 0.933 | 0.887 | 0.937 |
| 102841_at   | 0.193 | 0.866 | 0.912 | 0.963 | 0.941 |
| 102843_s_at | 0.458 | 1.017 | 0.984 | 0.983 | 0.959 |
| 102844_at   | 0.505 | 0.902 | 0.864 | 0.909 | 0.879 |
| 102845_at   | 0.253 | 0.801 | 0.819 | 0.949 | 0.845 |
| 102846_at   | 0.390 | 0.879 | 0.889 | 0.963 | 0.914 |
| 102847_s_at | 0.147 | 0.676 | 0.334 | 1.081 | 0.319 |
| 102848_f_at | 0.159 | 1.068 | 1.126 | 0.971 | 1.297 |
| 102849_at   | 0.185 | 0.952 | 0.926 | 1.062 | 0.974 |
| 102850_at   | 0.425 | 1.010 | 0.942 | 0.964 | 0.954 |
| 102851_s_at | 0.281 | 0.916 | 1.030 | 0.889 | 0.925 |
| 102852_at   | 0.468 | 1.008 | 0.969 | 1.021 | 1.037 |
| 102853_at   | 0.160 | 1.298 | 1.290 | 1.029 | 1.264 |
| 102854_s_at | 0.470 | 0.985 | 1.050 | 0.917 | 1.144 |
| 102856_at   | 0.297 | 0.845 | 0.779 | 0.940 | 0.803 |
| 102857_at   | 0.410 | 0.812 | 0.797 | 0.876 | 0.822 |
| 102858_at   | 0.204 | 0.972 | 1.040 | 0.957 | 1.047 |
| 102859_at   | 0.288 | 1.074 | 0.972 | 1.013 | 1.148 |
| 102860_at   | 0.016 | 0.992 | 2.861 | 0.991 | 1.348 |
| 102861_at   | 0.218 | 1.115 | 1.103 | 1.070 | 1.065 |
| 102862_at   | 0.223 | 1.108 | 0.979 | 1.091 | 1.005 |
| 102863_at   | 0.265 | 1.203 | 1.120 | 1.028 | 1.134 |
| 102864_at   | 0.401 | 0.877 | 0.847 | 0.895 | 0.893 |
| 102865_at   | 0.312 | 0.889 | 0.957 | 0.970 | 0.973 |
| 102866_at   | 0.320 | 0.867 | 0.828 | 0.933 | 0.879 |



|             |       |       |       |       |       |
|-------------|-------|-------|-------|-------|-------|
| 102867_at   | 0.377 | 0.906 | 0.888 | 0.963 | 0.890 |
| 102868_g_at | 0.484 | 0.907 | 0.890 | 0.949 | 0.913 |
| 102869_at   | 0.349 | 0.883 | 0.840 | 0.947 | 0.863 |
| 102870_at   | 0.316 | 1.160 | 1.070 | 0.991 | 1.214 |
| 102871_at   | 0.208 | 0.980 | 0.881 | 0.967 | 0.945 |
| 102872_f_at | 0.418 | 0.947 | 1.009 | 0.992 | 1.050 |
| 102873_at   | 0.146 | 1.115 | 1.261 | 1.020 | 1.006 |
| 102874_at   | 0.384 | 0.953 | 0.948 | 0.989 | 1.011 |
| 102875_at   | 0.507 | 1.170 | 1.195 | 1.143 | 1.204 |
| 102876_at   | 0.393 | 0.789 | 0.742 | 0.800 | 0.803 |
| 102877_at   | 0.295 | 0.915 | 0.977 | 0.949 | 0.945 |
| 102878_at   | 0.332 | 0.922 | 0.892 | 0.981 | 0.955 |
| 102879_s_at | 0.207 | 0.933 | 0.977 | 0.949 | 1.035 |
| 102880_at   | 0.117 | 0.974 | 0.983 | 1.035 | 1.056 |
| 102881_at   | 0.326 | 0.934 | 0.928 | 0.969 | 0.974 |
| 102882_at   | 0.410 | 0.950 | 0.988 | 0.937 | 0.951 |
| 102883_at   | 0.141 | 0.999 | 0.993 | 1.063 | 0.968 |
| 102884_at   | 0.350 | 0.996 | 1.042 | 1.020 | 1.027 |
| 102885_at   | 0.369 | 0.973 | 1.076 | 0.981 | 1.085 |
| 102886_at   | 0.328 | 1.079 | 1.013 | 1.028 | 1.081 |
| 102887_at   | 0.434 | 0.990 | 1.032 | 0.993 | 1.018 |
| 102888_s_at | 0.432 | 0.889 | 0.881 | 0.935 | 0.834 |
| 102889_r_at | 0.393 | 0.897 | 0.879 | 0.956 | 0.885 |
| 102890_at   | 0.224 | 0.988 | 0.920 | 1.024 | 0.937 |
| 102891_at   | 0.350 | 0.945 | 0.973 | 0.970 | 1.012 |
| 102892_at   | 0.035 | 0.965 | 1.192 | 0.965 | 1.014 |
| 102893_at   | 0.257 | 0.935 | 1.089 | 1.106 | 1.091 |
| 102894_g_at | 0.334 | 0.924 | 0.882 | 0.990 | 0.940 |
| 102895_at   | 0.329 | 1.289 | 1.208 | 1.004 | 1.332 |
| 102896_at   | 0.483 | 0.995 | 1.011 | 1.014 | 1.041 |
| 102898_at   | 0.440 | 0.995 | 0.953 | 0.961 | 0.949 |
| 102899_at   | 0.355 | 0.883 | 0.864 | 0.934 | 0.922 |
| 102900_at   | 0.261 | 0.852 | 0.854 | 0.864 | 0.854 |
| 102901_at   | 0.396 | 0.849 | 0.801 | 0.917 | 0.866 |
| 102902_at   | 0.364 | 0.836 | 0.810 | 0.926 | 0.851 |
| 102904_at   | 0.051 | 1.128 | 1.495 | 0.912 | 1.354 |
| 102905_at   | 0.133 | 1.029 | 1.361 | 1.052 | 1.081 |
| 102906_at   | 0.189 | 1.047 | 1.471 | 0.845 | 1.031 |
| 102907_at   | 0.147 | 1.367 | 1.202 | 0.994 | 1.250 |
| 102908_at   | 0.385 | 0.941 | 0.918 | 0.940 | 0.879 |
| 102910_at   | 0.323 | 0.989 | 0.968 | 1.061 | 1.061 |
| 102911_at   | 0.238 | 0.977 | 0.949 | 1.026 | 1.033 |
| 102912_at   | 0.217 | 1.450 | 1.333 | 1.066 | 1.351 |
| 102913_at   | 0.403 | 0.886 | 0.868 | 0.899 | 0.896 |
| 102914_s_at | 0.056 | 0.926 | 1.326 | 0.854 | 1.435 |
| 102915_at   | 0.307 | 1.094 | 1.014 | 1.082 | 1.045 |
| 102916_s_at | 0.078 | 1.232 | 0.838 | 1.218 | 0.940 |

|             |       |       |       |       |       |
|-------------|-------|-------|-------|-------|-------|
| 102917_at   | 0.470 | 0.902 | 0.881 | 0.903 | 0.900 |
| 102918_at   | 0.094 | 1.499 | 1.378 | 1.274 | 1.430 |
| 102919_at   | 0.330 | 1.078 | 1.011 | 1.009 | 1.033 |
| 102920_at   | 0.119 | 1.118 | 1.060 | 0.956 | 1.215 |
| 102921_s_at | 0.434 | 1.131 | 1.192 | 1.150 | 1.270 |
| 102922_at   | 0.332 | 1.255 | 1.146 | 1.133 | 1.131 |
| 102923_at   | 0.250 | 0.930 | 0.876 | 0.988 | 0.869 |
| 102924_at   | 0.205 | 0.874 | 0.797 | 0.907 | 0.857 |
| 102925_at   | 0.133 | 0.886 | 0.770 | 0.832 | 0.862 |
| 102926_at   | 0.163 | 0.880 | 0.800 | 0.933 | 0.849 |
| 102927_s_at | 0.467 | 0.988 | 0.968 | 0.979 | 0.992 |
| 102928_at   | 0.379 | 0.926 | 0.911 | 0.983 | 0.939 |
| 102929_s_at | 0.368 | 1.129 | 1.015 | 1.052 | 1.066 |
| 102930_at   | 0.468 | 0.912 | 0.867 | 0.946 | 0.890 |
| 102931_at   | 0.248 | 0.847 | 0.823 | 0.961 | 0.830 |
| 102932_at   | 0.343 | 0.943 | 0.928 | 0.959 | 0.879 |
| 102933_at   | 0.390 | 0.889 | 0.834 | 0.923 | 0.912 |
| 102934_s_at | 0.388 | 0.931 | 0.945 | 0.951 | 0.973 |
| 102935_at   | 0.348 | 0.919 | 0.935 | 0.965 | 0.956 |
| 102936_at   | 0.110 | 0.916 | 0.895 | 1.004 | 0.869 |
| 102937_at   | 0.288 | 0.918 | 0.904 | 0.996 | 0.920 |
| 102938_at   | 0.431 | 0.916 | 0.878 | 0.931 | 0.842 |
| 102939_s_at | 0.202 | 0.907 | 0.912 | 0.856 | 0.976 |
| 102940_at   | 0.111 | 0.755 | 0.968 | 0.702 | 0.783 |
| 102941_at   | 0.297 | 1.033 | 1.067 | 1.059 | 1.036 |
| 102942_at   | 0.271 | 1.192 | 1.089 | 1.064 | 1.215 |
| 102943_at   | 0.474 | 0.965 | 0.962 | 0.999 | 0.957 |
| 102944_at   | 0.480 | 0.997 | 1.008 | 1.015 | 0.994 |
| 102946_r_at | 0.361 | 0.884 | 0.792 | 0.882 | 0.810 |
| 102947_at   | 0.233 | 0.894 | 0.885 | 1.026 | 0.944 |
| 102948_at   | 0.458 | 0.969 | 0.931 | 0.998 | 0.937 |
| 102949_g_at | 0.397 | 0.870 | 0.882 | 0.943 | 0.881 |
| 102950_at   | 0.500 | 0.828 | 0.808 | 0.836 | 0.804 |
| 102951_at   | 0.328 | 0.980 | 0.893 | 0.966 | 0.926 |
| 102952_g_at | 0.362 | 1.177 | 1.167 | 1.058 | 1.173 |
| 102953_at   | 0.096 | 1.200 | 0.911 | 1.201 | 0.953 |
| 102954_at   | 0.139 | 0.965 | 0.867 | 0.997 | 0.974 |
| 102955_at   | 0.105 | 1.042 | 1.221 | 1.009 | 1.066 |
| 102956_at   | 0.280 | 0.970 | 0.901 | 0.968 | 0.868 |
| 102957_at   | 0.163 | 1.025 | 1.231 | 0.986 | 1.186 |
| 102958_at   | 0.067 | 0.904 | 0.897 | 1.030 | 0.935 |
| 102959_at   | 0.241 | 1.065 | 0.985 | 1.016 | 1.087 |
| 102960_at   | 0.350 | 1.174 | 1.190 | 1.035 | 1.135 |
| 102961_at   | 0.418 | 0.724 | 0.739 | 0.793 | 0.664 |
| 102962_at   | 0.338 | 0.917 | 0.941 | 0.973 | 0.897 |
| 102963_at   | 0.119 | 0.941 | 0.861 | 0.888 | 0.956 |
| 102964_at   | 0.477 | 1.095 | 1.124 | 1.025 | 1.152 |

|             |       |       |       |       |       |
|-------------|-------|-------|-------|-------|-------|
| 102965_at   | 0.125 | 1.054 | 0.932 | 0.963 | 1.013 |
| 102966_at   | 0.362 | 1.229 | 1.151 | 1.046 | 1.198 |
| 102967_at   | 0.377 | 0.922 | 0.888 | 0.930 | 0.938 |
| 102968_at   | 0.427 | 0.879 | 0.887 | 0.914 | 0.920 |
| 102969_at   | 0.145 | 1.260 | 1.082 | 1.128 | 1.119 |
| 102970_at   | 0.426 | 0.912 | 0.876 | 0.916 | 0.914 |
| 102971_at   | 0.441 | 0.914 | 0.948 | 0.915 | 0.932 |
| 102972_s_at | 0.328 | 0.896 | 0.848 | 0.956 | 0.854 |
| 102973_f_at | 0.504 | 0.915 | 0.894 | 0.926 | 0.903 |
| 102974_at   | 0.160 | 0.905 | 0.787 | 0.894 | 0.940 |
| 102975_at   | 0.445 | 0.861 | 0.867 | 0.866 | 0.881 |
| 102976_at   | 0.113 | 0.942 | 1.062 | 0.962 | 1.017 |
| 102977_at   | 0.393 | 0.885 | 0.905 | 0.963 | 0.892 |
| 102978_at   | 0.497 | 0.932 | 0.908 | 0.935 | 0.897 |
| 102979_at   | 0.475 | 0.875 | 0.871 | 0.916 | 0.837 |
| 102980_at   | 0.279 | 1.080 | 0.985 | 0.995 | 1.082 |
| 102981_at   | 0.468 | 0.900 | 0.888 | 0.947 | 0.929 |
| 102982_at   | 0.231 | 1.160 | 1.048 | 1.018 | 1.158 |
| 102983_at   | 0.440 | 1.458 | 1.368 | 1.237 | 1.404 |
| 102984_g_at | 0.405 | 1.291 | 1.249 | 1.109 | 1.276 |
| 102985_at   | 0.318 | 0.901 | 0.883 | 0.964 | 0.907 |
| 102986_at   | 0.306 | 0.866 | 0.874 | 0.972 | 0.880 |
| 102987_at   | 0.330 | 0.877 | 0.801 | 0.911 | 0.848 |
| 102988_at   | 0.205 | 0.982 | 1.027 | 1.033 | 0.921 |
| 102989_at   | 0.422 | 0.842 | 0.791 | 1.071 | 0.809 |
| 102990_at   | 0.301 | 1.072 | 1.539 | 1.109 | 1.386 |
| 102991_s_at | 0.422 | 1.046 | 1.014 | 0.976 | 1.016 |
| 102992_at   | 0.467 | 0.849 | 0.792 | 0.889 | 0.844 |
| 102993_at   | 0.251 | 1.063 | 0.973 | 1.010 | 1.091 |
| 102994_at   | 0.218 | 0.857 | 0.894 | 0.863 | 0.843 |
| 102995_s_at | 0.444 | 0.806 | 0.881 | 0.840 | 0.811 |
| 102996_at   | 0.364 | 1.126 | 1.113 | 1.103 | 1.064 |
| 102998_at   | 0.315 | 0.816 | 0.795 | 0.897 | 0.801 |
| 103001_at   | 0.165 | 0.995 | 0.935 | 1.154 | 0.917 |
| 103002_at   | 0.419 | 0.971 | 0.962 | 0.943 | 0.936 |
| 103003_i_at | 0.377 | 0.890 | 0.897 | 0.944 | 0.908 |
| 103004_r_at | 0.463 | 0.900 | 0.859 | 0.895 | 0.866 |
| 103005_s_at | 0.188 | 0.845 | 1.121 | 1.006 | 1.108 |
| 103006_at   | 0.061 | 1.071 | 1.093 | 1.178 | 0.847 |
| 103007_at   | 0.228 | 1.076 | 0.944 | 0.966 | 1.022 |
| 103009_at   | 0.251 | 0.914 | 0.903 | 0.982 | 0.997 |
| 103010_at   | 0.234 | 1.123 | 1.043 | 1.024 | 0.990 |
| 103011_at   | 0.404 | 1.118 | 1.138 | 1.037 | 1.106 |
| 103012_at   | 0.384 | 0.634 | 0.630 | 0.760 | 0.665 |
| 103013_at   | 0.392 | 0.973 | 0.956 | 0.962 | 0.967 |
| 103015_at   | 0.434 | 1.245 | 1.158 | 1.124 | 1.259 |
| 103016_s_at | 0.073 | 0.908 | 1.664 | 0.981 | 1.618 |

|             |       |       |       |       |       |
|-------------|-------|-------|-------|-------|-------|
| 103017_at   | 0.159 | 1.059 | 1.088 | 0.963 | 1.134 |
| 103018_at   | 0.301 | 1.077 | 1.181 | 0.894 | 1.103 |
| 103020_s_at | 0.194 | 1.439 | 1.408 | 1.067 | 1.216 |
| 103021_r_at | 0.397 | 0.994 | 0.952 | 0.859 | 0.991 |
| 103022_at   | 0.303 | 0.922 | 0.897 | 1.017 | 0.856 |
| 103023_at   | 0.452 | 0.875 | 0.822 | 0.880 | 0.862 |
| 103024_at   | 0.322 | 0.924 | 0.963 | 1.108 | 0.858 |
| 103025_at   | 0.370 | 0.942 | 0.942 | 0.985 | 0.964 |
| 103026_f_at | 0.481 | 0.800 | 0.762 | 0.824 | 0.767 |
| 103027_at   | 0.361 | 1.349 | 1.450 | 1.130 | 1.400 |
| 103028_at   | 0.332 | 0.882 | 0.938 | 0.910 | 0.969 |
| 103029_at   | 0.130 | 1.300 | 1.232 | 0.951 | 1.221 |
| 103030_at   | 0.163 | 1.011 | 1.039 | 1.076 | 0.982 |
| 103031_g_at | 0.253 | 0.965 | 0.946 | 1.029 | 0.989 |
| 103032_at   | 0.411 | 1.014 | 0.991 | 0.974 | 1.008 |
| 103033_at   | 0.220 | 1.430 | 1.664 | 1.170 | 1.349 |
| 103034_at   | 0.402 | 0.926 | 0.910 | 0.926 | 0.938 |
| 103035_at   | 0.278 | 1.187 | 1.338 | 1.014 | 1.174 |
| 103036_at   | 0.467 | 1.010 | 1.061 | 0.992 | 1.046 |
| 103037_at   | 0.147 | 0.954 | 0.934 | 1.043 | 0.976 |
| 103038_at   | 0.223 | 0.919 | 0.955 | 0.968 | 0.967 |
| 103039_at   | 0.133 | 0.996 | 0.907 | 0.984 | 0.875 |
| 103040_at   | 0.013 | 1.011 | 1.552 | 0.881 | 1.184 |
| 103041_at   | 0.314 | 0.957 | 0.868 | 1.037 | 0.922 |
| 103043_at   | 0.389 | 1.099 | 1.052 | 1.035 | 1.108 |
| 103044_g_at | 0.335 | 0.868 | 0.822 | 0.931 | 0.843 |
| 103045_at   | 0.283 | 0.990 | 0.980 | 0.965 | 0.921 |
| 103046_at   | 0.378 | 1.180 | 1.136 | 1.068 | 1.134 |
| 103047_at   | 0.434 | 1.140 | 1.150 | 1.051 | 1.136 |
| 103048_at   | 0.080 | 0.933 | 0.823 | 0.987 | 0.925 |
| 103049_at   | 0.419 | 0.874 | 0.830 | 0.942 | 0.879 |
| 103050_at   | 0.461 | 1.107 | 1.068 | 1.046 | 1.128 |
| 103051_at   | 0.091 | 0.926 | 0.895 | 1.014 | 0.896 |
| 103052_r_at | 0.206 | 1.078 | 0.951 | 0.909 | 0.954 |
| 103053_at   | 0.445 | 0.835 | 0.828 | 0.906 | 0.815 |
| 103054_at   | 0.183 | 1.195 | 1.107 | 1.145 | 0.889 |
| 103055_r_at | 0.163 | 0.855 | 0.778 | 0.953 | 0.820 |
| 103056_at   | 0.458 | 1.068 | 1.140 | 1.033 | 1.083 |
| 103057_at   | 0.404 | 0.916 | 0.949 | 0.931 | 0.914 |
| 103058_f_at | 0.338 | 0.890 | 0.892 | 0.974 | 0.929 |
| 103059_at   | 0.196 | 0.994 | 0.917 | 1.029 | 0.805 |
| 103060_at   | 0.381 | 0.902 | 0.913 | 0.971 | 0.859 |
| 103061_at   | 0.138 | 1.052 | 0.990 | 1.003 | 1.042 |
| 103062_at   | 0.293 | 1.078 | 0.972 | 0.990 | 1.042 |
| 103063_at   | 0.427 | 1.122 | 1.151 | 0.973 | 1.282 |
| 103064_at   | 0.483 | 0.995 | 1.000 | 1.033 | 0.999 |
| 103065_at   | 0.331 | 1.092 | 1.039 | 1.008 | 1.005 |

|             |       |       |       |       |       |
|-------------|-------|-------|-------|-------|-------|
| 103066_at   | 0.161 | 0.850 | 0.777 | 0.865 | 0.840 |
| 103067_at   | 0.371 | 1.073 | 1.119 | 1.044 | 1.165 |
| 103068_at   | 0.212 | 0.924 | 0.876 | 0.957 | 0.902 |
| 103069_at   | 0.391 | 0.904 | 0.820 | 0.918 | 0.897 |
| 103070_at   | 0.193 | 1.379 | 1.344 | 1.146 | 1.533 |
| 103071_at   | 0.339 | 1.083 | 1.100 | 0.972 | 1.150 |
| 103072_at   | 0.472 | 0.865 | 0.854 | 0.918 | 0.856 |
| 103073_i_at | 0.311 | 0.966 | 0.944 | 0.928 | 1.079 |
| 103074_f_at | 0.069 | 1.366 | 1.529 | 0.920 | 1.670 |
| 103075_at   | 0.475 | 0.974 | 0.930 | 0.982 | 0.959 |
| 103076_at   | 0.350 | 1.223 | 1.254 | 1.073 | 1.214 |
| 103078_at   | 0.419 | 1.021 | 0.957 | 1.018 | 1.029 |
| 103079_at   | 0.440 | 1.034 | 1.021 | 0.988 | 1.024 |
| 103080_at   | 0.096 | 1.146 | 1.316 | 0.964 | 1.195 |
| 103081_at   | 0.096 | 1.283 | 1.218 | 1.035 | 1.147 |
| 103082_at   | 0.342 | 1.276 | 1.268 | 1.122 | 1.269 |
| 103083_at   | 0.297 | 1.021 | 0.913 | 1.237 | 0.957 |
| 103084_at   | 0.422 | 0.818 | 0.713 | 0.912 | 0.811 |
| 103085_at   | 0.035 | 0.984 | 1.032 | 0.953 | 1.126 |
| 103086_at   | 0.176 | 1.158 | 1.008 | 1.121 | 0.918 |
| 103087_at   | 0.156 | 1.041 | 0.927 | 1.099 | 0.987 |
| 103088_at   | 0.212 | 0.935 | 0.954 | 1.021 | 0.883 |
| 103089_at   | 0.056 | 0.946 | 1.394 | 0.912 | 1.249 |
| 103090_at   | 0.475 | 0.980 | 0.939 | 0.984 | 0.945 |
| 103091_at   | 0.062 | 0.956 | 1.099 | 0.978 | 0.910 |
| 103092_at   | 0.417 | 1.105 | 1.092 | 1.074 | 1.187 |
| 103094_at   | 0.231 | 0.921 | 0.854 | 0.924 | 0.932 |
| 103095_at   | 0.052 | 1.026 | 0.870 | 1.013 | 0.933 |
| 103096_at   | 0.486 | 0.913 | 0.885 | 0.947 | 0.904 |
| 103097_at   | 0.496 | 1.101 | 1.181 | 1.108 | 1.174 |
| 103098_at   | 0.064 | 1.005 | 0.905 | 1.080 | 0.970 |
| 103099_f_at | 0.414 | 1.079 | 1.047 | 1.030 | 1.052 |
| 103100_at   | 0.353 | 1.234 | 1.217 | 1.079 | 1.326 |
| 103101_at   | 0.403 | 0.915 | 0.912 | 0.984 | 0.914 |
| 103132_at   | 0.474 | 0.973 | 0.942 | 0.991 | 0.959 |
| 103198_at   | 0.241 | 0.871 | 0.804 | 0.900 | 0.815 |
| 103199_at   | 0.241 | 0.820 | 0.783 | 0.905 | 0.864 |
| 103200_at   | 0.237 | 1.001 | 1.065 | 0.917 | 1.011 |
| 103201_at   | 0.082 | 0.938 | 1.062 | 0.969 | 1.061 |
| 103202_at   | 0.371 | 1.078 | 1.058 | 0.928 | 1.080 |
| 103203_f_at | 0.361 | 1.044 | 1.053 | 1.011 | 1.146 |
| 103204_r_at | 0.406 | 0.946 | 0.888 | 0.952 | 0.954 |
| 103205_at   | 0.486 | 1.062 | 1.080 | 1.093 | 1.090 |
| 103206_at   | 0.483 | 1.010 | 1.002 | 1.023 | 1.017 |
| 103207_at   | 0.283 | 0.990 | 1.089 | 0.968 | 1.091 |
| 103208_at   | 0.410 | 0.893 | 0.908 | 0.951 | 0.864 |
| 103209_at   | 0.452 | 1.187 | 1.148 | 1.112 | 1.169 |

|             |       |       |       |       |       |
|-------------|-------|-------|-------|-------|-------|
| 103210_at   | 0.167 | 0.952 | 1.095 | 1.044 | 1.175 |
| 103211_at   | 0.496 | 1.044 | 1.027 | 1.037 | 1.024 |
| 103212_at   | 0.256 | 0.952 | 0.943 | 0.945 | 1.017 |
| 103213_at   | 0.380 | 0.845 | 0.849 | 0.936 | 0.855 |
| 103214_at   | 0.135 | 1.047 | 0.951 | 0.912 | 1.040 |
| 103215_g_at | 0.163 | 1.159 | 1.038 | 1.028 | 1.170 |
| 103216_f_at | 0.308 | 1.043 | 1.081 | 0.971 | 1.005 |
| 103217_at   | 0.375 | 1.053 | 0.978 | 0.904 | 1.009 |
| 103218_at   | 0.187 | 1.034 | 1.040 | 1.032 | 0.984 |
| 103219_at   | 0.375 | 0.866 | 0.799 | 0.940 | 0.880 |
| 103220_at   | 0.474 | 1.059 | 1.047 | 1.030 | 1.089 |
| 103221_at   | 0.362 | 1.109 | 1.104 | 1.068 | 1.154 |
| 103222_at   | 0.334 | 1.230 | 1.371 | 1.125 | 1.312 |
| 103223_at   | 0.338 | 1.243 | 1.178 | 1.037 | 1.323 |
| 103224_at   | 0.417 | 0.918 | 0.880 | 0.963 | 0.869 |
| 103225_at   | 0.136 | 1.054 | 1.082 | 0.940 | 1.194 |
| 103226_at   | 0.044 | 1.337 | 2.246 | 1.201 | 1.748 |
| 103227_at   | 0.081 | 0.895 | 0.813 | 0.948 | 0.959 |
| 103228_at   | 0.341 | 0.898 | 0.863 | 0.920 | 0.923 |
| 103229_at   | 0.383 | 1.064 | 1.122 | 1.089 | 1.123 |
| 103231_at   | 0.094 | 0.833 | 0.901 | 0.798 | 0.795 |
| 103232_at   | 0.342 | 1.051 | 0.955 | 1.010 | 0.986 |
| 103233_at   | 0.368 | 0.808 | 0.857 | 0.950 | 0.877 |
| 103234_at   | 0.286 | 0.910 | 0.909 | 0.957 | 0.872 |
| 103235_at   | 0.221 | 0.837 | 0.807 | 0.929 | 0.830 |
| 103236_at   | 0.392 | 0.994 | 0.959 | 1.006 | 0.923 |
| 103237_at   | 0.419 | 0.945 | 0.910 | 0.997 | 0.919 |
| 103238_at   | 0.016 | 0.825 | 0.718 | 0.934 | 0.750 |
| 103239_at   | 0.480 | 0.954 | 0.955 | 0.980 | 0.900 |
| 103240_f_at | 0.051 | 0.871 | 1.676 | 0.910 | 1.633 |
| 103241_at   | 0.072 | 0.970 | 0.921 | 1.035 | 0.963 |
| 103242_at   | 0.328 | 1.041 | 1.127 | 1.050 | 1.145 |
| 103243_at   | 0.364 | 0.948 | 0.882 | 0.961 | 1.060 |
| 103244_at   | 0.064 | 0.903 | 0.858 | 1.047 | 0.884 |
| 103245_at   | 0.219 | 0.926 | 0.863 | 0.888 | 0.906 |
| 103247_at   | 0.255 | 0.850 | 0.782 | 0.841 | 0.844 |
| 103248_at   | 0.171 | 0.944 | 0.931 | 0.957 | 0.998 |
| 103249_at   | 0.325 | 0.869 | 0.793 | 0.932 | 0.809 |
| 103250_at   | 0.329 | 0.827 | 0.777 | 0.888 | 0.831 |
| 103251_at   | 0.250 | 1.128 | 1.048 | 1.005 | 1.161 |
| 103252_at   | 0.306 | 0.795 | 0.796 | 0.823 | 0.846 |
| 103253_at   | 0.468 | 0.825 | 0.776 | 0.876 | 0.801 |
| 103254_at   | 0.289 | 1.255 | 1.290 | 1.127 | 1.291 |
| 103255_at   | 0.359 | 0.992 | 0.944 | 0.973 | 1.021 |
| 103256_at   | 0.279 | 0.853 | 0.790 | 0.858 | 0.871 |
| 103257_at   | 0.350 | 1.254 | 1.435 | 1.190 | 1.364 |
| 103258_at   | 0.297 | 1.389 | 1.503 | 1.197 | 1.754 |

|             |       |       |       |       |       |
|-------------|-------|-------|-------|-------|-------|
| 103259_at   | 0.407 | 0.881 | 0.910 | 0.931 | 0.864 |
| 103260_at   | 0.249 | 1.200 | 1.065 | 1.074 | 1.117 |
| 103261_at   | 0.379 | 0.884 | 0.845 | 0.919 | 0.878 |
| 103262_at   | 0.341 | 0.855 | 0.902 | 0.899 | 0.945 |
| 103263_at   | 0.354 | 1.155 | 1.053 | 1.013 | 1.084 |
| 103264_at   | 0.298 | 0.856 | 0.854 | 0.952 | 0.895 |
| 103265_r_at | 0.349 | 0.777 | 0.701 | 0.784 | 0.762 |
| 103266_at   | 0.388 | 0.839 | 0.865 | 0.896 | 0.882 |
| 103267_i_at | 0.239 | 0.845 | 0.832 | 0.876 | 0.937 |
| 103268_r_at | 0.398 | 0.847 | 0.781 | 0.827 | 0.798 |
| 103269_f_at | 0.244 | 0.897 | 0.913 | 0.805 | 1.200 |
| 103270_at   | 0.441 | 0.854 | 0.807 | 0.903 | 0.839 |
| 103271_at   | 0.276 | 0.901 | 0.905 | 0.972 | 0.897 |
| 103272_at   | 0.408 | 0.961 | 0.915 | 1.011 | 0.909 |
| 103273_s_at | 0.125 | 0.954 | 0.904 | 1.062 | 0.917 |
| 103274_at   | 0.344 | 0.877 | 0.862 | 0.961 | 0.919 |
| 103275_at   | 0.098 | 0.784 | 0.868 | 1.033 | 0.902 |
| 103276_at   | 0.305 | 0.981 | 0.902 | 0.988 | 0.968 |
| 103277_s_at | 0.420 | 1.175 | 1.076 | 1.094 | 1.132 |
| 103278_at   | 0.342 | 0.983 | 0.923 | 0.983 | 0.974 |
| 103279_at   | 0.399 | 0.951 | 0.914 | 0.922 | 0.893 |
| 103281_at   | 0.181 | 1.069 | 0.968 | 0.963 | 1.274 |
| 103282_at   | 0.332 | 0.933 | 0.914 | 0.972 | 0.926 |
| 103283_at   | 0.248 | 1.099 | 1.201 | 1.035 | 1.206 |
| 103284_at   | 0.369 | 0.864 | 0.859 | 0.945 | 0.877 |
| 103285_at   | 0.490 | 0.984 | 0.955 | 0.989 | 0.967 |
| 103286_at   | 0.098 | 0.837 | 0.880 | 0.965 | 0.967 |
| 103288_at   | 0.228 | 1.083 | 1.017 | 1.130 | 1.059 |
| 103289_at   | 0.059 | 0.971 | 1.136 | 0.951 | 0.909 |
| 103291_at   | 0.443 | 0.860 | 0.865 | 0.918 | 0.885 |
| 103292_at   | 0.392 | 0.960 | 0.940 | 0.986 | 0.982 |
| 103293_at   | 0.184 | 0.841 | 0.886 | 0.960 | 0.884 |
| 103294_at   | 0.147 | 0.856 | 0.910 | 0.955 | 0.856 |
| 103295_at   | 0.290 | 1.088 | 1.090 | 1.072 | 0.985 |
| 103296_at   | 0.450 | 0.899 | 0.908 | 0.951 | 0.919 |
| 103297_at   | 0.264 | 0.978 | 0.873 | 1.110 | 0.975 |
| 103298_at   | 0.472 | 0.824 | 0.806 | 0.915 | 0.821 |
| 103299_at   | 0.094 | 1.152 | 1.326 | 1.080 | 1.339 |
| 103300_at   | 0.412 | 1.145 | 1.164 | 1.104 | 1.297 |
| 103301_i_at | 0.483 | 0.846 | 0.827 | 0.883 | 0.849 |
| 103302_r_at | 0.363 | 0.900 | 0.880 | 0.984 | 0.915 |
| 103303_at   | 0.508 | 1.070 | 1.092 | 1.047 | 1.062 |
| 103305_at   | 0.191 | 1.014 | 0.904 | 1.107 | 0.908 |
| 103306_at   | 0.332 | 0.980 | 0.986 | 1.023 | 1.013 |
| 103308_at   | 0.375 | 0.981 | 0.940 | 0.995 | 0.976 |
| 103309_at   | 0.239 | 1.032 | 1.020 | 1.075 | 0.985 |
| 103310_at   | 0.189 | 1.039 | 0.946 | 0.920 | 0.998 |

|             |       |       |       |       |       |
|-------------|-------|-------|-------|-------|-------|
| 103311_at   | 0.165 | 1.093 | 0.998 | 1.003 | 1.041 |
| 103312_f_at | 0.184 | 1.271 | 1.261 | 0.956 | 1.247 |
| 103313_r_at | 0.353 | 1.011 | 0.953 | 0.989 | 0.971 |
| 103314_at   | 0.125 | 1.145 | 1.064 | 0.986 | 1.247 |
| 103315_at   | 0.130 | 1.242 | 1.121 | 0.972 | 1.133 |
| 103316_at   | 0.298 | 0.994 | 0.952 | 1.018 | 0.945 |
| 103317_at   | 0.459 | 0.979 | 0.948 | 0.992 | 0.943 |
| 103318_at   | 0.363 | 1.040 | 0.997 | 0.965 | 1.081 |
| 103319_at   | 0.166 | 1.017 | 1.020 | 0.946 | 1.084 |
| 103321_at   | 0.102 | 1.331 | 1.206 | 1.051 | 1.256 |
| 103322_at   | 0.440 | 1.078 | 1.029 | 1.017 | 1.036 |
| 103326_at   | 0.400 | 1.103 | 1.064 | 1.028 | 1.063 |
| 103327_at   | 0.132 | 0.899 | 0.859 | 1.118 | 0.891 |
| 103328_at   | 0.294 | 1.207 | 1.439 | 1.188 | 1.357 |
| 103329_at   | 0.490 | 0.917 | 0.898 | 0.916 | 0.907 |
| 103330_at   | 0.389 | 0.984 | 0.924 | 1.001 | 0.952 |
| 103331_at   | 0.280 | 0.959 | 1.008 | 1.084 | 0.988 |
| 103332_at   | 0.395 | 0.997 | 0.903 | 0.960 | 0.979 |
| 103333_at   | 0.326 | 0.902 | 0.815 | 0.931 | 0.894 |
| 103334_at   | 0.392 | 0.976 | 0.992 | 0.972 | 0.979 |
| 103335_at   | 0.335 | 0.942 | 1.005 | 0.961 | 1.037 |
| 103336_r_at | 0.388 | 0.932 | 0.914 | 0.931 | 0.894 |
| 103338_at   | 0.337 | 1.040 | 0.951 | 1.042 | 1.006 |
| 103340_at   | 0.449 | 0.874 | 0.851 | 0.943 | 0.848 |
| 103341_at   | 0.091 | 1.121 | 1.292 | 0.976 | 1.186 |
| 103342_at   | 0.162 | 1.333 | 1.420 | 1.111 | 1.372 |
| 103343_at   | 0.282 | 1.065 | 0.940 | 1.015 | 1.010 |
| 103344_at   | 0.227 | 1.169 | 1.053 | 1.031 | 1.054 |
| 103345_at   | 0.285 | 1.114 | 1.042 | 1.079 | 1.049 |
| 103346_at   | 0.470 | 1.032 | 0.991 | 0.993 | 1.021 |
| 103347_at   | 0.230 | 1.110 | 0.969 | 1.063 | 1.001 |
| 103348_at   | 0.312 | 1.028 | 0.983 | 0.966 | 0.960 |
| 103349_at   | 0.319 | 1.076 | 1.064 | 0.999 | 1.153 |
| 103350_at   | 0.369 | 1.133 | 1.102 | 1.048 | 1.078 |
| 103352_at   | 0.337 | 0.963 | 1.033 | 0.993 | 1.101 |
| 103353_f_at | 0.081 | 1.050 | 0.876 | 0.999 | 0.922 |
| 103354_at   | 0.401 | 1.022 | 1.004 | 0.985 | 1.028 |
| 103355_at   | 0.470 | 0.907 | 0.859 | 0.927 | 0.883 |
| 103356_at   | 0.281 | 1.154 | 1.066 | 1.029 | 1.114 |
| 103357_at   | 0.318 | 0.957 | 0.968 | 0.999 | 0.938 |
| 103359_at   | 0.421 | 0.942 | 0.875 | 0.947 | 0.913 |
| 103360_at   | 0.346 | 0.872 | 0.790 | 0.912 | 0.846 |
| 103361_at   | 0.410 | 0.972 | 0.984 | 1.014 | 0.934 |
| 103362_at   | 0.095 | 0.977 | 1.194 | 0.928 | 1.084 |
| 103363_at   | 0.292 | 1.059 | 1.021 | 1.000 | 1.022 |
| 103364_f_at | 0.478 | 1.086 | 1.089 | 1.057 | 1.147 |
| 103365_s_at | 0.246 | 1.030 | 1.074 | 0.949 | 1.079 |



|             |       |       |       |       |       |
|-------------|-------|-------|-------|-------|-------|
| 103366_at   | 0.224 | 0.919 | 0.967 | 0.954 | 1.002 |
| 103367_at   | 0.219 | 1.329 | 1.457 | 1.203 | 1.357 |
| 103369_at   | 0.091 | 1.112 | 0.969 | 0.982 | 0.866 |
| 103370_at   | 0.209 | 1.381 | 1.261 | 1.059 | 1.337 |
| 103371_at   | 0.219 | 1.450 | 1.534 | 1.202 | 1.300 |
| 103372_at   | 0.484 | 0.878 | 0.844 | 0.933 | 0.882 |
| 103374_at   | 0.313 | 0.834 | 0.746 | 0.798 | 0.749 |
| 103375_at   | 0.120 | 0.963 | 0.865 | 0.984 | 0.850 |
| 103376_s_at | 0.480 | 1.094 | 1.083 | 1.051 | 1.069 |
| 103377_at   | 0.174 | 1.014 | 0.922 | 0.965 | 1.118 |
| 103378_at   | 0.248 | 0.840 | 0.808 | 0.955 | 0.880 |
| 103379_at   | 0.290 | 1.192 | 1.411 | 1.097 | 1.460 |
| 103381_at   | 0.274 | 0.949 | 1.021 | 1.030 | 0.905 |
| 103384_at   | 0.392 | 0.961 | 0.872 | 0.969 | 0.943 |
| 103385_at   | 0.258 | 0.994 | 1.053 | 0.983 | 1.066 |
| 103386_at   | 0.228 | 1.000 | 1.068 | 1.067 | 1.052 |
| 103387_at   | 0.039 | 0.905 | 0.814 | 0.893 | 0.761 |
| 103388_at   | 0.211 | 0.892 | 0.875 | 0.952 | 0.878 |
| 103389_at   | 0.210 | 1.046 | 1.353 | 1.018 | 1.084 |
| 103391_at   | 0.266 | 0.982 | 0.931 | 1.035 | 0.959 |
| 103392_at   | 0.388 | 1.038 | 1.049 | 1.016 | 1.146 |
| 103393_at   | 0.292 | 1.164 | 1.110 | 1.001 | 1.183 |
| 103394_at   | 0.172 | 1.057 | 1.219 | 1.026 | 1.222 |
| 103395_at   | 0.239 | 0.864 | 0.810 | 0.971 | 0.809 |
| 103397_at   | 0.174 | 1.185 | 1.136 | 1.006 | 1.228 |
| 103398_at   | 0.134 | 1.042 | 0.981 | 1.018 | 0.899 |
| 103399_at   | 0.328 | 1.044 | 1.016 | 1.053 | 0.983 |
| 103400_at   | 0.459 | 1.165 | 1.226 | 1.008 | 1.239 |
| 103401_at   | 0.321 | 0.954 | 0.987 | 1.096 | 1.013 |
| 103402_at   | 0.320 | 1.250 | 1.130 | 1.084 | 1.209 |
| 103403_at   | 0.368 | 0.907 | 0.927 | 0.957 | 0.913 |
| 103404_at   | 0.222 | 1.282 | 1.169 | 1.101 | 1.079 |
| 103405_at   | 0.444 | 0.958 | 0.987 | 0.990 | 0.950 |
| 103406_at   | 0.233 | 1.229 | 1.163 | 1.022 | 1.126 |
| 103407_at   | 0.396 | 0.988 | 0.964 | 0.997 | 1.005 |
| 103408_at   | 0.179 | 1.031 | 0.950 | 0.886 | 0.958 |
| 103409_at   | 0.359 | 1.023 | 0.911 | 0.939 | 1.012 |
| 103411_at   | 0.298 | 0.962 | 0.888 | 0.970 | 0.915 |
| 103412_at   | 0.140 | 1.218 | 1.076 | 1.007 | 1.224 |
| 103413_at   | 0.377 | 0.910 | 0.903 | 0.953 | 0.950 |
| 103414_at   | 0.375 | 1.184 | 1.124 | 1.125 | 1.156 |
| 103415_at   | 0.458 | 1.084 | 1.115 | 0.985 | 1.114 |
| 103416_at   | 0.348 | 1.224 | 1.184 | 1.157 | 1.168 |
| 103418_at   | 0.301 | 0.945 | 1.025 | 1.013 | 1.032 |
| 103420_at   | 0.198 | 0.921 | 0.881 | 0.973 | 0.941 |
| 103421_at   | 0.402 | 0.979 | 1.024 | 1.007 | 1.003 |
| 103422_at   | 0.281 | 1.214 | 1.048 | 1.347 | 1.345 |

|             |       |       |       |       |       |
|-------------|-------|-------|-------|-------|-------|
| 103423_at   | 0.235 | 1.267 | 1.157 | 1.141 | 1.165 |
| 103424_at   | 0.115 | 1.019 | 1.076 | 0.943 | 1.048 |
| 103427_at   | 0.160 | 1.137 | 1.063 | 0.982 | 1.161 |
| 103428_at   | 0.350 | 1.029 | 0.986 | 1.033 | 1.027 |
| 103429_i_at | 0.394 | 1.234 | 1.281 | 1.251 | 1.232 |
| 103430_at   | 0.495 | 0.853 | 0.812 | 0.860 | 0.811 |
| 103432_at   | 0.110 | 1.009 | 1.200 | 1.088 | 0.967 |
| 103433_at   | 0.350 | 0.996 | 0.930 | 0.941 | 1.024 |
| 103434_at   | 0.143 | 0.589 | 0.736 | 0.952 | 0.867 |
| 103435_at   | 0.156 | 1.116 | 1.071 | 0.941 | 1.226 |
| 103436_at   | 0.410 | 1.060 | 1.083 | 1.027 | 1.035 |
| 103437_at   | 0.331 | 0.948 | 0.849 | 0.959 | 0.861 |
| 103438_at   | 0.165 | 0.895 | 0.925 | 1.046 | 0.884 |
| 103439_at   | 0.286 | 0.834 | 0.809 | 0.926 | 0.841 |
| 103440_at   | 0.474 | 1.295 | 1.270 | 1.109 | 1.394 |
| 103441_at   | 0.402 | 1.092 | 1.072 | 1.050 | 1.036 |
| 103442_at   | 0.441 | 1.117 | 1.081 | 1.052 | 1.194 |
| 103443_at   | 0.170 | 1.313 | 1.425 | 1.170 | 1.365 |
| 103444_at   | 0.322 | 1.082 | 1.062 | 1.002 | 1.108 |
| 103445_at   | 0.391 | 0.913 | 0.867 | 0.912 | 0.850 |
| 103446_at   | 0.244 | 1.207 | 1.223 | 1.029 | 1.307 |
| 103447_at   | 0.390 | 1.024 | 1.015 | 1.021 | 0.989 |
| 103448_at   | 0.314 | 0.523 | 0.640 | 0.648 | 0.777 |
| 103449_at   | 0.180 | 1.135 | 1.050 | 1.001 | 1.072 |
| 103450_at   | 0.178 | 1.035 | 0.955 | 1.086 | 0.959 |
| 103451_at   | 0.308 | 1.075 | 1.065 | 0.934 | 1.159 |
| 103452_at   | 0.206 | 0.841 | 0.859 | 0.991 | 0.901 |
| 103454_at   | 0.443 | 0.837 | 0.834 | 0.883 | 0.853 |
| 103455_at   | 0.385 | 1.021 | 0.963 | 0.994 | 1.007 |
| 103456_at   | 0.238 | 1.207 | 1.110 | 1.063 | 1.033 |
| 103457_at   | 0.072 | 1.188 | 0.998 | 0.964 | 1.117 |
| 103458_at   | 0.236 | 1.277 | 1.638 | 1.090 | 1.396 |
| 103459_at   | 0.353 | 1.188 | 1.125 | 0.998 | 1.210 |
| 103460_at   | 0.147 | 1.188 | 1.391 | 1.140 | 1.437 |
| 103462_at   | 0.254 | 0.973 | 1.081 | 0.963 | 1.076 |
| 103463_at   | 0.406 | 0.959 | 0.915 | 0.934 | 0.941 |
| 103465_f_at | 0.470 | 0.942 | 0.967 | 0.977 | 0.943 |
| 103466_at   | 0.296 | 0.893 | 0.892 | 0.961 | 0.875 |
| 103467_g_at | 0.161 | 1.167 | 1.052 | 1.029 | 1.023 |
| 103468_at   | 0.125 | 1.146 | 0.994 | 1.104 | 1.016 |
| 103469_at   | 0.458 | 0.878 | 0.858 | 0.943 | 0.868 |
| 103470_at   | 0.290 | 0.889 | 0.819 | 0.928 | 0.889 |
| 103471_at   | 0.145 | 0.971 | 1.113 | 1.009 | 1.144 |
| 103472_at   | 0.432 | 1.038 | 0.981 | 1.033 | 0.985 |
| 103473_at   | 0.250 | 0.850 | 0.826 | 0.925 | 0.861 |
| 103475_s_at | 0.251 | 0.855 | 0.850 | 0.940 | 0.924 |
| 103476_at   | 0.290 | 1.000 | 0.993 | 1.049 | 0.974 |

|             |       |       |       |       |       |
|-------------|-------|-------|-------|-------|-------|
| 103477_at   | 0.379 | 1.043 | 0.951 | 1.055 | 0.962 |
| 103478_at   | 0.235 | 0.909 | 0.878 | 1.007 | 0.932 |
| 103479_at   | 0.314 | 0.945 | 0.880 | 0.980 | 0.920 |
| 103480_at   | 0.449 | 0.886 | 0.861 | 0.895 | 0.893 |
| 103481_at   | 0.377 | 0.839 | 0.785 | 0.828 | 0.831 |
| 103483_at   | 0.441 | 1.047 | 0.984 | 1.037 | 1.019 |
| 103484_at   | 0.343 | 1.011 | 0.945 | 0.991 | 1.017 |
| 103485_at   | 0.251 | 1.162 | 1.161 | 1.169 | 1.053 |
| 103486_at   | 0.303 | 0.835 | 1.103 | 0.902 | 0.933 |
| 103487_at   | 0.424 | 0.901 | 0.872 | 0.956 | 0.903 |
| 103488_at   | 0.159 | 1.047 | 1.276 | 0.981 | 1.235 |
| 103489_at   | 0.110 | 1.121 | 1.037 | 1.082 | 0.974 |
| 103490_at   | 0.064 | 0.991 | 0.864 | 1.020 | 0.866 |
| 103491_at   | 0.414 | 0.946 | 0.897 | 0.974 | 0.950 |
| 103492_at   | 0.246 | 0.978 | 1.134 | 0.971 | 1.034 |
| 103493_at   | 0.456 | 0.911 | 0.913 | 0.933 | 0.882 |
| 103494_at   | 0.229 | 1.311 | 1.245 | 1.016 | 1.320 |
| 103495_at   | 0.348 | 0.967 | 0.918 | 0.975 | 0.975 |
| 103496_at   | 0.389 | 0.875 | 0.843 | 0.887 | 0.796 |
| 103497_at   | 0.472 | 1.195 | 1.160 | 1.118 | 1.223 |
| 103498_at   | 0.328 | 0.893 | 0.835 | 0.976 | 0.876 |
| 103499_at   | 0.198 | 1.392 | 1.648 | 1.060 | 1.191 |
| 103500_at   | 0.263 | 1.344 | 1.164 | 1.042 | 1.210 |
| 103501_at   | 0.288 | 0.980 | 0.976 | 1.046 | 0.950 |
| 103502_at   | 0.297 | 0.787 | 0.762 | 0.853 | 0.748 |
| 103503_at   | 0.127 | 0.900 | 1.080 | 0.974 | 0.985 |
| 103504_at   | 0.324 | 1.206 | 1.180 | 1.173 | 1.206 |
| 103506_f_at | 0.126 | 0.983 | 1.054 | 1.024 | 0.949 |
| 103507_at   | 0.026 | 1.116 | 1.443 | 1.096 | 1.323 |
| 103508_at   | 0.365 | 1.038 | 1.042 | 0.990 | 1.019 |
| 103509_at   | 0.159 | 0.906 | 1.041 | 0.937 | 0.929 |
| 103510_at   | 0.325 | 0.881 | 0.869 | 0.967 | 0.910 |
| 103511_at   | 0.493 | 0.979 | 0.974 | 1.017 | 0.967 |
| 103512_at   | 0.109 | 0.913 | 0.850 | 0.969 | 0.929 |
| 103513_at   | 0.481 | 0.851 | 0.842 | 0.896 | 0.836 |
| 103514_at   | 0.188 | 1.089 | 0.976 | 1.061 | 0.996 |
| 103515_at   | 0.354 | 1.021 | 1.005 | 0.988 | 1.001 |
| 103516_at   | 0.069 | 1.156 | 1.071 | 1.085 | 0.964 |
| 103517_at   | 0.129 | 0.876 | 1.068 | 0.894 | 0.978 |
| 103518_at   | 0.309 | 1.048 | 1.110 | 0.972 | 1.384 |
| 103519_at   | 0.048 | 0.955 | 0.837 | 0.941 | 0.911 |
| 103520_at   | 0.410 | 1.007 | 1.009 | 1.027 | 1.152 |
| 103521_r_at | 0.382 | 0.814 | 0.756 | 0.877 | 0.841 |
| 103522_at   | 0.188 | 0.952 | 0.899 | 0.989 | 0.940 |
| 103523_at   | 0.279 | 1.064 | 1.062 | 1.071 | 0.988 |
| 103524_at   | 0.288 | 1.027 | 0.918 | 0.972 | 0.986 |
| 103525_at   | 0.238 | 1.050 | 1.200 | 1.058 | 1.203 |

|             |       |       |       |       |       |
|-------------|-------|-------|-------|-------|-------|
| 103526_at   | 0.367 | 0.870 | 0.829 | 0.944 | 0.872 |
| 103527_at   | 0.432 | 1.122 | 1.159 | 1.054 | 1.127 |
| 103529_at   | 0.283 | 0.965 | 0.992 | 0.992 | 1.013 |
| 103530_at   | 0.288 | 0.983 | 0.961 | 1.022 | 1.038 |
| 103531_f_at | 0.106 | 1.100 | 1.439 | 0.947 | 1.049 |
| 103532_at   | 0.349 | 0.996 | 1.002 | 0.995 | 1.041 |
| 103533_at   | 0.331 | 0.925 | 0.900 | 1.010 | 0.963 |
| 103534_at   | 0.258 | 1.052 | 1.040 | 1.007 | 1.124 |
| 103535_at   | 0.305 | 0.833 | 0.773 | 0.913 | 0.840 |
| 103536_at   | 0.200 | 1.035 | 0.960 | 1.064 | 1.045 |
| 103537_at   | 0.330 | 0.996 | 0.971 | 0.909 | 1.027 |
| 103538_at   | 0.208 | 1.026 | 0.893 | 0.990 | 0.991 |
| 103539_at   | 0.231 | 0.938 | 0.981 | 0.910 | 0.991 |
| 103540_at   | 0.424 | 0.823 | 0.778 | 0.889 | 0.777 |
| 103541_at   | 0.329 | 0.944 | 0.907 | 0.976 | 0.970 |
| 103542_at   | 0.253 | 1.005 | 0.925 | 1.029 | 0.950 |
| 103543_at   | 0.444 | 0.863 | 0.831 | 0.877 | 0.857 |
| 103544_at   | 0.347 | 0.913 | 0.955 | 0.964 | 0.931 |
| 103545_at   | 0.499 | 0.966 | 0.966 | 0.932 | 0.964 |
| 103546_at   | 0.422 | 0.820 | 0.786 | 0.916 | 0.813 |
| 103547_at   | 0.484 | 1.137 | 1.111 | 1.089 | 1.115 |
| 103548_at   | 0.467 | 0.860 | 0.878 | 0.899 | 0.888 |
| 103549_at   | 0.249 | 1.304 | 1.171 | 1.079 | 1.179 |
| 103550_at   | 0.132 | 0.928 | 0.944 | 0.940 | 1.159 |
| 103551_at   | 0.388 | 1.022 | 0.955 | 1.005 | 0.999 |
| 103552_at   | 0.349 | 0.996 | 1.007 | 1.048 | 1.080 |
| 103553_at   | 0.444 | 0.896 | 0.925 | 0.938 | 0.909 |
| 103554_at   | 0.239 | 1.270 | 1.226 | 1.121 | 1.265 |
| 103555_at   | 0.282 | 1.393 | 1.365 | 1.115 | 1.325 |
| 103556_at   | 0.189 | 1.101 | 0.941 | 1.131 | 1.031 |
| 103557_at   | 0.132 | 0.975 | 1.002 | 0.931 | 0.887 |
| 103558_at   | 0.290 | 0.930 | 0.861 | 0.949 | 0.944 |
| 103559_at   | 0.200 | 0.903 | 0.935 | 1.057 | 0.907 |
| 103560_at   | 0.196 | 1.081 | 0.972 | 0.986 | 0.916 |
| 103562_f_at | 0.136 | 1.151 | 1.394 | 1.072 | 1.108 |
| 103563_at   | 0.022 | 1.084 | 1.264 | 0.979 | 1.057 |
| 103564_at   | 0.290 | 0.970 | 0.947 | 0.973 | 1.006 |
| 103565_at   | 0.308 | 0.883 | 0.935 | 0.873 | 0.892 |
| 103567_at   | 0.200 | 1.155 | 0.999 | 1.032 | 1.046 |
| 103568_at   | 0.264 | 0.877 | 0.864 | 0.950 | 0.899 |
| 103569_at   | 0.354 | 1.067 | 1.082 | 1.128 | 1.117 |
| 103570_at   | 0.056 | 1.080 | 0.983 | 1.098 | 0.999 |
| 103571_at   | 0.114 | 1.060 | 1.120 | 0.976 | 1.218 |
| 103573_at   | 0.470 | 0.994 | 1.054 | 0.992 | 1.051 |
| 103574_at   | 0.295 | 1.164 | 1.099 | 1.009 | 1.092 |
| 103575_at   | 0.468 | 1.003 | 0.968 | 0.994 | 0.955 |
| 103577_at   | 0.072 | 0.879 | 0.869 | 0.984 | 0.897 |

|             |       |       |       |       |       |
|-------------|-------|-------|-------|-------|-------|
| 103578_at   | 0.222 | 1.069 | 1.053 | 1.055 | 0.982 |
| 103579_at   | 0.075 | 0.793 | 1.027 | 0.870 | 0.947 |
| 103580_at   | 0.312 | 0.986 | 0.948 | 1.023 | 1.015 |
| 103581_at   | 0.042 | 0.831 | 0.669 | 0.801 | 1.019 |
| 103582_r_at | 0.425 | 1.042 | 1.024 | 0.953 | 1.023 |
| 103584_at   | 0.228 | 1.358 | 1.280 | 1.027 | 1.189 |
| 103585_at   | 0.244 | 1.171 | 1.183 | 1.025 | 1.238 |
| 103588_at   | 0.343 | 0.974 | 0.943 | 1.014 | 0.933 |
| 103589_at   | 0.269 | 0.904 | 0.878 | 0.987 | 0.886 |
| 103590_at   | 0.232 | 1.015 | 1.042 | 1.099 | 1.096 |
| 103591_at   | 0.369 | 0.952 | 0.936 | 0.935 | 0.894 |
| 103592_at   | 0.436 | 1.073 | 1.057 | 1.066 | 1.059 |
| 103593_at   | 0.326 | 0.799 | 0.760 | 0.947 | 0.778 |
| 103594_at   | 0.507 | 0.962 | 0.929 | 0.976 | 0.930 |
| 103595_at   | 0.478 | 0.924 | 0.874 | 0.940 | 0.891 |
| 103596_at   | 0.456 | 0.984 | 1.015 | 0.977 | 1.043 |
| 103597_at   | 0.349 | 0.873 | 0.838 | 0.930 | 0.852 |
| 103598_at   | 0.315 | 1.096 | 1.175 | 1.120 | 1.225 |
| 103599_at   | 0.308 | 1.147 | 1.046 | 1.091 | 1.088 |
| 103600_at   | 0.124 | 0.958 | 0.919 | 0.994 | 0.902 |
| 103601_at   | 0.332 | 0.878 | 0.888 | 0.963 | 0.895 |
| 103602_at   | 0.400 | 0.887 | 0.849 | 0.930 | 0.896 |
| 103603_at   | 0.427 | 0.950 | 0.941 | 0.927 | 0.922 |
| 103604_at   | 0.428 | 0.935 | 0.899 | 0.935 | 0.864 |
| 103605_g_at | 0.187 | 0.807 | 0.951 | 0.935 | 0.936 |
| 103606_r_at | 0.331 | 0.925 | 0.956 | 0.885 | 0.947 |
| 103607_at   | 0.292 | 0.864 | 0.890 | 0.923 | 0.936 |
| 103608_at   | 0.429 | 1.081 | 1.143 | 1.050 | 1.101 |
| 103609_at   | 0.379 | 0.928 | 0.850 | 0.974 | 0.846 |
| 103610_at   | 0.345 | 0.966 | 0.908 | 0.995 | 1.033 |
| 103611_at   | 0.224 | 1.423 | 1.312 | 1.076 | 1.269 |
| 103612_at   | 0.470 | 0.819 | 0.760 | 0.852 | 0.806 |
| 103613_at   | 0.273 | 0.926 | 0.908 | 1.002 | 0.836 |
| 103614_at   | 0.033 | 1.014 | 1.089 | 0.973 | 0.939 |
| 103615_at   | 0.311 | 0.996 | 0.986 | 0.969 | 0.994 |
| 103616_at   | 0.163 | 0.862 | 0.828 | 0.917 | 0.856 |
| 103617_at   | 0.146 | 1.154 | 1.421 | 1.113 | 1.143 |
| 103618_at   | 0.398 | 0.863 | 0.715 | 0.904 | 0.731 |
| 103619_at   | 0.386 | 1.158 | 1.221 | 1.069 | 1.187 |
| 103620_s_at | 0.443 | 1.088 | 1.137 | 1.033 | 1.057 |
| 103622_at   | 0.158 | 0.899 | 0.834 | 0.952 | 0.874 |
| 103623_at   | 0.486 | 0.945 | 0.937 | 0.999 | 0.940 |
| 103624_at   | 0.188 | 0.907 | 0.884 | 1.000 | 0.962 |
| 103625_at   | 0.081 | 0.949 | 1.029 | 0.963 | 0.988 |
| 103628_at   | 0.335 | 0.899 | 0.857 | 0.927 | 0.882 |
| 103629_g_at | 0.261 | 0.828 | 0.843 | 0.846 | 0.899 |
| 103630_at   | 0.096 | 1.219 | 1.257 | 1.038 | 1.238 |

|             |       |       |       |       |       |
|-------------|-------|-------|-------|-------|-------|
| 103631_at   | 0.284 | 1.130 | 1.033 | 1.017 | 1.109 |
| 103632_at   | 0.397 | 0.909 | 0.869 | 0.904 | 0.921 |
| 103634_at   | 0.341 | 1.266 | 1.165 | 1.032 | 1.156 |
| 103635_at   | 0.478 | 1.010 | 1.052 | 1.026 | 1.058 |
| 103636_at   | 0.241 | 1.068 | 0.976 | 1.073 | 1.012 |
| 103637_at   | 0.309 | 1.143 | 1.180 | 1.110 | 1.132 |
| 103638_at   | 0.272 | 1.291 | 1.130 | 1.171 | 1.273 |
| 103639_at   | 0.216 | 1.136 | 1.081 | 0.983 | 1.116 |
| 103641_at   | 0.117 | 0.857 | 0.935 | 0.940 | 0.955 |
| 103642_at   | 0.343 | 1.161 | 1.183 | 1.034 | 1.177 |
| 103643_at   | 0.147 | 1.081 | 1.058 | 0.983 | 1.117 |
| 103644_at   | 0.345 | 1.138 | 1.028 | 1.095 | 1.096 |
| 103645_at   | 0.331 | 0.886 | 0.812 | 0.914 | 0.821 |
| 103646_at   | 0.380 | 1.025 | 1.009 | 1.232 | 1.030 |
| 103647_at   | 0.225 | 1.243 | 1.387 | 1.117 | 1.324 |
| 103648_at   | 0.236 | 1.021 | 0.935 | 1.083 | 1.118 |
| 103649_at   | 0.375 | 0.888 | 0.873 | 0.925 | 0.911 |
| 103650_at   | 0.147 | 0.908 | 0.902 | 0.973 | 0.928 |
| 103651_r_at | 0.500 | 0.926 | 0.903 | 0.946 | 0.915 |
| 103653_at   | 0.189 | 0.853 | 0.814 | 0.905 | 0.848 |
| 103654_at   | 0.269 | 1.141 | 1.050 | 1.091 | 1.107 |
| 103655_at   | 0.390 | 1.046 | 0.982 | 0.994 | 1.017 |
| 103656_at   | 0.478 | 1.061 | 1.073 | 1.052 | 1.076 |
| 103657_i_at | 0.478 | 1.096 | 1.064 | 1.042 | 1.101 |
| 103658_r_at | 0.389 | 1.025 | 0.979 | 1.005 | 1.018 |
| 103660_at   | 0.291 | 1.038 | 0.930 | 1.081 | 1.037 |
| 103662_at   | 0.059 | 0.982 | 1.314 | 0.956 | 1.232 |
| 103663_at   | 0.042 | 0.920 | 0.895 | 0.948 | 0.864 |
| 103664_r_at | 0.399 | 1.065 | 0.996 | 0.992 | 1.077 |
| 103665_at   | 0.302 | 0.846 | 0.782 | 1.360 | 0.797 |
| 103666_at   | 0.071 | 0.944 | 0.801 | 0.911 | 0.784 |
| 103667_at   | 0.215 | 1.365 | 1.194 | 1.199 | 1.219 |
| 103668_at   | 0.298 | 1.030 | 0.982 | 1.002 | 0.927 |
| 103669_at   | 0.379 | 0.932 | 0.908 | 0.994 | 0.943 |
| 103670_at   | 0.303 | 0.840 | 0.798 | 0.927 | 0.838 |
| 103671_at   | 0.053 | 1.016 | 0.983 | 0.948 | 1.080 |
| 103672_at   | 0.244 | 1.134 | 1.085 | 1.007 | 1.096 |
| 103673_at   | 0.377 | 1.113 | 1.073 | 0.965 | 1.090 |
| 103674_f_at | 0.408 | 0.954 | 0.964 | 0.963 | 0.945 |
| 103675_at   | 0.290 | 1.047 | 0.994 | 0.964 | 1.004 |
| 103676_at   | 0.269 | 0.934 | 0.866 | 1.002 | 0.931 |
| 103678_at   | 0.278 | 0.983 | 0.924 | 0.959 | 0.942 |
| 103679_at   | 0.165 | 0.867 | 0.853 | 0.988 | 0.868 |
| 103680_at   | 0.228 | 0.728 | 0.829 | 0.847 | 0.911 |
| 103681_at   | 0.406 | 1.036 | 1.021 | 1.049 | 1.013 |
| 103682_at   | 0.423 | 1.222 | 1.248 | 1.211 | 1.176 |
| 103683_at   | 0.474 | 1.028 | 1.011 | 1.004 | 0.996 |

|             |       |       |       |       |       |
|-------------|-------|-------|-------|-------|-------|
| 103684_at   | 0.294 | 1.009 | 0.921 | 1.013 | 1.008 |
| 103685_at   | 0.328 | 1.238 | 1.227 | 0.915 | 1.389 |
| 103686_at   | 0.161 | 0.897 | 1.027 | 0.880 | 0.981 |
| 103688_at   | 0.392 | 0.948 | 0.926 | 0.908 | 0.936 |
| 103689_at   | 0.112 | 1.117 | 0.955 | 1.029 | 1.082 |
| 103690_at   | 0.090 | 0.974 | 1.355 | 0.901 | 1.204 |
| 103691_at   | 0.144 | 0.873 | 0.807 | 0.902 | 0.866 |
| 103692_at   | 0.350 | 0.873 | 0.883 | 0.945 | 0.919 |
| 103693_at   | 0.371 | 1.022 | 1.035 | 1.017 | 1.002 |
| 103694_at   | 0.424 | 0.921 | 0.888 | 0.969 | 0.892 |
| 103695_f_at | 0.096 | 1.474 | 1.358 | 0.984 | 1.423 |
| 103696_r_at | 0.432 | 1.023 | 1.073 | 1.003 | 1.032 |
| 103697_at   | 0.379 | 1.383 | 1.358 | 1.157 | 1.478 |
| 103699_i_at | 0.318 | 1.131 | 1.007 | 1.089 | 1.091 |
| 103700_r_at | 0.448 | 0.893 | 0.872 | 0.905 | 0.834 |
| 103701_at   | 0.077 | 0.978 | 0.930 | 1.050 | 0.943 |
| 103702_i_at | 0.283 | 0.956 | 0.952 | 1.011 | 0.937 |
| 103703_f_at | 0.122 | 0.894 | 0.819 | 0.925 | 0.883 |
| 103704_at   | 0.412 | 1.163 | 1.082 | 1.161 | 1.116 |
| 103706_at   | 0.284 | 0.970 | 0.915 | 1.029 | 1.039 |
| 103707_at   | 0.109 | 1.045 | 1.285 | 1.076 | 1.161 |
| 103708_at   | 0.096 | 1.004 | 1.089 | 0.970 | 1.053 |
| 103709_at   | 0.372 | 0.981 | 1.050 | 1.040 | 1.011 |
| 103710_at   | 0.365 | 1.081 | 1.044 | 0.995 | 1.091 |
| 103711_at   | 0.223 | 1.133 | 1.056 | 1.071 | 1.062 |
| 103712_at   | 0.505 | 1.093 | 1.105 | 1.045 | 1.131 |
| 103713_at   | 0.285 | 1.040 | 0.995 | 0.907 | 1.117 |
| 103714_at   | 0.231 | 0.990 | 0.980 | 0.971 | 1.089 |
| 103715_at   | 0.003 | 0.915 | 2.036 | 0.994 | 0.986 |
| 103716_at   | 0.393 | 1.104 | 1.022 | 0.991 | 1.123 |
| 103717_at   | 0.337 | 1.068 | 1.027 | 1.014 | 1.001 |
| 103718_at   | 0.314 | 0.842 | 0.800 | 0.937 | 0.791 |
| 103719_at   | 0.414 | 0.813 | 0.796 | 0.849 | 0.830 |
| 103720_at   | 0.269 | 1.079 | 0.977 | 0.994 | 1.177 |
| 103721_at   | 0.244 | 1.151 | 0.928 | 1.055 | 1.085 |
| 103723_at   | 0.236 | 1.223 | 1.066 | 1.120 | 1.059 |
| 103726_at   | 0.161 | 1.207 | 1.250 | 0.951 | 1.205 |
| 103727_at   | 0.308 | 1.255 | 1.080 | 1.047 | 1.214 |
| 103728_at   | 0.419 | 0.874 | 0.850 | 0.922 | 0.877 |
| 103729_at   | 0.337 | 0.944 | 0.905 | 1.009 | 0.911 |
| 103730_at   | 0.375 | 0.894 | 0.924 | 0.954 | 0.904 |
| 103731_at   | 0.444 | 1.000 | 0.960 | 0.965 | 0.983 |
| 103732_at   | 0.428 | 0.898 | 0.873 | 0.941 | 0.893 |
| 103733_at   | 0.189 | 1.115 | 1.072 | 1.099 | 1.034 |
| 103734_at   | 0.145 | 0.998 | 0.932 | 1.062 | 1.049 |
| 103735_at   | 0.274 | 0.852 | 0.828 | 0.973 | 0.805 |
| 103736_at   | 0.107 | 1.224 | 1.034 | 1.161 | 0.929 |

|             |       |       |       |       |       |
|-------------|-------|-------|-------|-------|-------|
| 103737_at   | 0.128 | 0.867 | 0.807 | 0.917 | 0.860 |
| 103738_at   | 0.314 | 0.966 | 0.916 | 0.994 | 0.936 |
| 103739_at   | 0.379 | 1.129 | 1.016 | 1.107 | 1.121 |
| 103741_at   | 0.364 | 0.847 | 0.814 | 0.925 | 0.880 |
| 103742_at   | 0.266 | 1.024 | 0.920 | 1.023 | 1.013 |
| 103743_at   | 0.253 | 1.090 | 0.972 | 1.005 | 1.105 |
| 103744_at   | 0.165 | 1.004 | 1.092 | 1.032 | 0.992 |
| 103745_at   | 0.254 | 0.895 | 1.044 | 1.013 | 1.051 |
| 103746_at   | 0.132 | 0.898 | 0.962 | 1.014 | 1.117 |
| 103748_at   | 0.298 | 1.038 | 1.005 | 1.068 | 0.995 |
| 103751_at   | 0.323 | 1.014 | 0.964 | 1.044 | 1.015 |
| 103752_r_at | 0.490 | 1.074 | 1.084 | 0.997 | 1.105 |
| 103753_at   | 0.216 | 1.307 | 1.382 | 1.060 | 1.429 |
| 103754_at   | 0.318 | 1.268 | 1.276 | 0.974 | 1.251 |
| 103755_at   | 0.309 | 0.989 | 0.995 | 1.026 | 0.944 |
| 103756_at   | 0.316 | 0.983 | 0.945 | 1.004 | 0.996 |
| 103757_at   | 0.387 | 0.873 | 0.876 | 0.889 | 0.901 |
| 103759_at   | 0.204 | 1.164 | 1.144 | 1.023 | 1.192 |
| 103760_at   | 0.139 | 0.990 | 0.900 | 1.042 | 0.911 |
| 103761_at   | 0.376 | 1.294 | 1.231 | 1.097 | 1.322 |
| 103762_at   | 0.315 | 0.989 | 0.997 | 0.992 | 0.975 |
| 103763_at   | 0.329 | 1.223 | 1.167 | 1.096 | 1.213 |
| 103765_at   | 0.377 | 0.923 | 0.886 | 0.923 | 0.957 |
| 103766_at   | 0.423 | 1.040 | 1.026 | 0.984 | 1.012 |
| 103767_f_at | 0.411 | 0.974 | 0.919 | 0.929 | 0.921 |
| 103768_at   | 0.273 | 0.810 | 0.820 | 0.917 | 0.860 |
| 103769_at   | 0.301 | 0.906 | 0.919 | 0.963 | 0.910 |
| 103770_at   | 0.222 | 0.907 | 0.823 | 0.963 | 0.899 |
| 103771_at   | 0.246 | 0.915 | 0.861 | 0.990 | 0.881 |
| 103773_at   | 0.230 | 0.941 | 0.954 | 1.071 | 1.030 |
| 103774_at   | 0.188 | 0.945 | 0.801 | 0.903 | 0.921 |
| 103776_at   | 0.414 | 0.858 | 0.788 | 0.893 | 0.833 |
| 103778_at   | 0.365 | 0.881 | 0.847 | 0.925 | 0.915 |
| 103779_at   | 0.495 | 1.035 | 1.023 | 1.011 | 1.027 |
| 103780_at   | 0.107 | 0.990 | 0.897 | 1.016 | 1.005 |
| 103781_at   | 0.205 | 1.257 | 1.259 | 1.088 | 1.119 |
| 103782_at   | 0.344 | 0.877 | 0.800 | 0.967 | 0.851 |
| 103783_at   | 0.359 | 1.354 | 1.239 | 1.187 | 1.289 |
| 103784_at   | 0.303 | 0.887 | 0.875 | 0.965 | 0.939 |
| 103786_at   | 0.362 | 0.914 | 0.936 | 0.964 | 0.961 |
| 103787_at   | 0.306 | 0.894 | 0.809 | 0.959 | 0.819 |
| 103789_at   | 0.111 | 1.110 | 0.986 | 1.032 | 1.137 |
| 103790_at   | 0.309 | 0.973 | 0.968 | 1.008 | 0.953 |
| 103791_at   | 0.168 | 1.020 | 1.091 | 1.051 | 1.167 |
| 103792_at   | 0.196 | 0.925 | 0.858 | 0.996 | 0.849 |
| 103793_at   | 0.076 | 0.998 | 1.009 | 0.948 | 0.991 |
| 103794_i_at | 0.497 | 0.984 | 0.985 | 1.031 | 0.966 |



|             |       |       |       |       |       |
|-------------|-------|-------|-------|-------|-------|
| 103795_f_at | 0.371 | 0.887 | 0.816 | 0.927 | 0.861 |
| 103796_at   | 0.320 | 1.045 | 1.060 | 0.965 | 1.167 |
| 103797_at   | 0.347 | 0.959 | 0.953 | 0.980 | 1.020 |
| 103799_at   | 0.139 | 0.966 | 0.949 | 0.955 | 1.021 |
| 103800_at   | 0.174 | 1.026 | 0.908 | 0.982 | 0.980 |
| 103801_at   | 0.488 | 0.843 | 0.833 | 0.883 | 0.836 |
| 103803_at   | 0.274 | 0.910 | 0.818 | 0.967 | 0.860 |
| 103804_at   | 0.156 | 1.227 | 0.984 | 1.030 | 1.093 |
| 103805_at   | 0.264 | 1.009 | 1.070 | 0.985 | 1.055 |
| 103806_at   | 0.035 | 0.854 | 0.846 | 1.046 | 0.749 |
| 103807_at   | 0.280 | 1.014 | 0.986 | 1.029 | 0.898 |
| 103808_at   | 0.332 | 1.016 | 1.054 | 0.965 | 1.004 |
| 103809_r_at | 0.203 | 0.903 | 0.835 | 0.980 | 0.910 |
| 103810_at   | 0.303 | 0.867 | 0.864 | 0.986 | 0.847 |
| 103811_at   | 0.308 | 1.006 | 0.954 | 0.964 | 0.984 |
| 103812_at   | 0.390 | 0.908 | 0.862 | 0.928 | 0.901 |
| 103813_at   | 0.245 | 0.926 | 0.913 | 0.981 | 0.965 |
| 103814_at   | 0.151 | 0.904 | 0.958 | 0.989 | 1.005 |
| 103815_at   | 0.142 | 0.897 | 0.918 | 0.984 | 0.944 |
| 103816_at   | 0.106 | 1.301 | 1.178 | 1.032 | 1.255 |
| 103817_at   | 0.389 | 1.038 | 1.071 | 1.034 | 1.031 |
| 103818_at   | 0.239 | 1.137 | 1.163 | 1.060 | 1.222 |
| 103819_at   | 0.389 | 0.895 | 0.919 | 0.967 | 0.885 |
| 103821_at   | 0.117 | 0.808 | 0.959 | 0.837 | 0.932 |
| 103822_at   | 0.504 | 1.029 | 1.015 | 1.031 | 0.995 |
| 103823_at   | 0.151 | 1.014 | 0.910 | 0.997 | 0.962 |
| 103824_at   | 0.248 | 1.071 | 1.003 | 1.087 | 1.039 |
| 103825_at   | 0.203 | 0.901 | 0.881 | 1.001 | 0.904 |
| 103826_at   | 0.432 | 0.926 | 0.912 | 0.975 | 0.969 |
| 103828_at   | 0.354 | 0.926 | 0.901 | 0.970 | 0.890 |
| 103829_at   | 0.380 | 1.009 | 0.976 | 1.008 | 1.048 |
| 103830_at   | 0.210 | 1.021 | 0.931 | 1.115 | 0.947 |
| 103831_at   | 0.431 | 0.923 | 0.935 | 0.973 | 0.952 |
| 103832_at   | 0.472 | 0.876 | 0.844 | 0.923 | 0.844 |
| 103833_at   | 0.261 | 0.963 | 0.953 | 1.025 | 0.887 |
| 103835_f_at | 0.137 | 1.080 | 0.988 | 1.018 | 1.083 |
| 103836_at   | 0.445 | 1.041 | 1.018 | 0.981 | 1.065 |
| 103837_at   | 0.349 | 0.940 | 0.877 | 0.978 | 0.942 |
| 103838_at   | 0.130 | 0.801 | 0.828 | 0.911 | 0.841 |
| 103839_at   | 0.220 | 0.938 | 0.876 | 0.937 | 0.828 |
| 103840_at   | 0.505 | 1.014 | 1.017 | 1.014 | 0.998 |
| 103841_at   | 0.427 | 0.958 | 0.923 | 0.951 | 0.974 |
| 103842_at   | 0.391 | 0.995 | 0.971 | 1.002 | 0.967 |
| 103843_at   | 0.297 | 0.940 | 0.893 | 0.941 | 0.897 |
| 103844_at   | 0.330 | 0.865 | 0.773 | 0.911 | 0.779 |
| 103845_at   | 0.204 | 1.298 | 1.153 | 1.089 | 1.200 |
| 103846_at   | 0.331 | 0.862 | 0.790 | 0.940 | 0.833 |

|             |       |       |       |       |       |
|-------------|-------|-------|-------|-------|-------|
| 103847_at   | 0.354 | 0.919 | 0.873 | 0.866 | 0.873 |
| 103848_at   | 0.366 | 1.213 | 1.133 | 1.098 | 1.173 |
| 103849_at   | 0.219 | 0.860 | 0.912 | 1.001 | 0.919 |
| 103850_at   | 0.398 | 1.005 | 0.965 | 1.057 | 1.030 |
| 103852_at   | 0.151 | 1.168 | 1.150 | 0.981 | 1.124 |
| 103853_at   | 0.148 | 0.957 | 1.016 | 0.971 | 1.007 |
| 103854_at   | 0.147 | 0.981 | 0.978 | 1.024 | 1.050 |
| 103855_at   | 0.189 | 0.943 | 0.789 | 1.024 | 0.913 |
| 103858_at   | 0.287 | 1.000 | 0.964 | 1.035 | 0.984 |
| 103859_at   | 0.284 | 0.891 | 0.883 | 0.998 | 0.931 |
| 103860_at   | 0.468 | 0.909 | 0.849 | 0.953 | 0.860 |
| 103861_s_at | 0.135 | 0.859 | 1.041 | 0.958 | 0.973 |
| 103862_r_at | 0.472 | 0.876 | 0.874 | 0.905 | 0.850 |
| 103863_at   | 0.274 | 0.970 | 0.996 | 0.929 | 0.992 |
| 103865_at   | 0.364 | 0.932 | 0.916 | 0.937 | 0.960 |
| 103866_at   | 0.029 | 0.937 | 1.087 | 0.895 | 0.928 |
| 103867_at   | 0.351 | 0.784 | 0.742 | 0.875 | 0.832 |
| 103868_at   | 0.434 | 0.943 | 0.875 | 0.972 | 0.951 |
| 103869_at   | 0.128 | 1.070 | 0.880 | 1.049 | 1.089 |
| 103871_at   | 0.126 | 1.131 | 1.062 | 1.000 | 1.060 |
| 103872_r_at | 0.104 | 0.956 | 0.876 | 0.985 | 0.899 |
| 103873_i_at | 0.425 | 1.388 | 1.333 | 1.143 | 1.455 |
| 103874_r_at | 0.383 | 1.052 | 1.010 | 1.024 | 1.045 |
| 103875_at   | 0.261 | 1.181 | 1.143 | 0.973 | 1.189 |
| 103876_at   | 0.324 | 1.044 | 1.059 | 1.036 | 1.084 |
| 103877_at   | 0.117 | 1.033 | 0.974 | 0.988 | 1.053 |
| 103878_at   | 0.390 | 1.119 | 1.186 | 1.086 | 1.207 |
| 103879_at   | 0.151 | 0.969 | 0.959 | 1.057 | 1.038 |
| 103881_at   | 0.496 | 1.126 | 1.174 | 1.063 | 1.158 |
| 103882_at   | 0.472 | 0.848 | 0.858 | 0.880 | 0.839 |
| 103884_at   | 0.328 | 0.946 | 0.957 | 0.919 | 0.951 |
| 103885_at   | 0.218 | 0.996 | 1.003 | 0.956 | 1.035 |
| 103886_at   | 0.378 | 1.139 | 1.102 | 1.160 | 1.135 |
| 103887_at   | 0.282 | 0.593 | 0.749 | 0.704 | 0.803 |
| 103888_at   | 0.068 | 1.011 | 0.946 | 1.086 | 0.878 |
| 103889_at   | 0.438 | 1.288 | 1.370 | 1.139 | 1.356 |
| 103890_at   | 0.257 | 1.018 | 0.922 | 1.000 | 0.996 |
| 103891_i_at | 0.185 | 1.412 | 1.731 | 1.194 | 1.717 |
| 103892_r_at | 0.161 | 1.046 | 1.186 | 0.983 | 1.195 |
| 103893_at   | 0.178 | 1.120 | 1.068 | 0.964 | 1.092 |
| 103894_at   | 0.295 | 0.912 | 0.919 | 0.927 | 0.934 |
| 103895_at   | 0.367 | 1.244 | 1.164 | 1.084 | 1.162 |
| 103896_f_at | 0.505 | 0.972 | 0.940 | 0.991 | 0.955 |
| 103897_r_at | 0.278 | 0.880 | 0.837 | 0.937 | 0.837 |
| 103899_at   | 0.277 | 1.461 | 1.525 | 1.103 | 1.482 |
| 103900_at   | 0.125 | 1.169 | 1.057 | 1.081 | 1.042 |
| 103901_at   | 0.324 | 1.105 | 1.067 | 0.963 | 1.129 |

|             |       |       |       |       |       |
|-------------|-------|-------|-------|-------|-------|
| 103903_at   | 0.265 | 0.950 | 0.914 | 0.984 | 0.912 |
| 103904_at   | 0.104 | 1.138 | 0.904 | 0.944 | 0.937 |
| 103905_at   | 0.350 | 0.901 | 0.850 | 0.929 | 0.871 |
| 103906_f_at | 0.205 | 1.099 | 1.027 | 1.023 | 1.155 |
| 103907_at   | 0.114 | 0.896 | 0.794 | 0.977 | 0.933 |
| 103908_at   | 0.260 | 1.076 | 1.027 | 0.971 | 1.006 |
| 103909_at   | 0.468 | 0.916 | 0.951 | 0.959 | 0.902 |
| 103910_at   | 0.130 | 1.138 | 1.257 | 1.077 | 1.023 |
| 103911_at   | 0.129 | 1.337 | 1.256 | 1.112 | 1.237 |
| 103912_at   | 0.245 | 0.902 | 0.914 | 0.964 | 0.948 |
| 103913_at   | 0.377 | 1.022 | 0.975 | 1.006 | 1.023 |
| 103914_at   | 0.166 | 0.972 | 0.935 | 0.977 | 0.894 |
| 103916_at   | 0.145 | 1.219 | 1.040 | 0.996 | 1.233 |
| 103918_at   | 0.109 | 0.810 | 0.769 | 0.922 | 0.840 |
| 103921_i_at | 0.350 | 1.054 | 1.003 | 0.980 | 1.038 |
| 103922_f_at | 0.239 | 1.540 | 1.373 | 1.171 | 1.349 |
| 103923_at   | 0.165 | 0.932 | 0.983 | 0.958 | 1.057 |
| 103924_at   | 0.366 | 0.977 | 0.922 | 0.965 | 0.953 |
| 103925_at   | 0.246 | 1.149 | 1.086 | 0.984 | 1.096 |
| 103926_at   | 0.145 | 0.772 | 0.900 | 1.014 | 0.905 |
| 103927_at   | 0.350 | 1.056 | 0.967 | 1.040 | 1.071 |
| 103928_at   | 0.429 | 0.915 | 0.938 | 0.952 | 0.950 |
| 103930_at   | 0.136 | 1.189 | 1.224 | 1.002 | 1.268 |
| 103931_at   | 0.325 | 0.927 | 0.872 | 1.000 | 0.882 |
| 103932_at   | 0.209 | 1.397 | 1.533 | 1.149 | 1.433 |
| 103933_at   | 0.362 | 0.986 | 0.998 | 1.042 | 1.056 |
| 103934_at   | 0.441 | 0.854 | 0.824 | 0.897 | 0.850 |
| 103935_at   | 0.120 | 1.484 | 1.395 | 1.179 | 1.269 |
| 103939_at   | 0.420 | 1.051 | 1.012 | 1.123 | 0.996 |
| 103941_at   | 0.445 | 0.966 | 0.942 | 0.963 | 0.957 |
| 103942_at   | 0.421 | 0.874 | 0.833 | 0.932 | 0.862 |
| 103943_at   | 0.377 | 0.888 | 0.849 | 0.905 | 0.919 |
| 103944_at   | 0.235 | 0.923 | 0.923 | 0.997 | 0.948 |
| 103945_at   | 0.483 | 0.910 | 0.913 | 0.965 | 0.913 |
| 103946_at   | 0.298 | 0.987 | 1.084 | 0.946 | 0.988 |
| 103947_at   | 0.285 | 1.183 | 1.079 | 1.012 | 1.176 |
| 103948_at   | 0.448 | 0.815 | 0.777 | 0.879 | 0.824 |
| 103949_at   | 0.298 | 0.942 | 0.865 | 0.990 | 0.920 |
| 103950_at   | 0.494 | 0.780 | 0.790 | 0.808 | 0.772 |
| 103952_at   | 0.490 | 0.824 | 0.816 | 0.878 | 0.820 |
| 103953_at   | 0.163 | 1.071 | 1.266 | 1.025 | 1.106 |
| 103954_at   | 0.289 | 0.907 | 0.871 | 0.937 | 0.884 |
| 103955_at   | 0.244 | 1.150 | 1.143 | 1.061 | 1.131 |
| 103956_at   | 0.492 | 1.003 | 0.964 | 1.005 | 0.965 |
| 103957_at   | 0.343 | 0.834 | 0.915 | 0.901 | 0.908 |
| 103958_g_at | 0.281 | 0.878 | 0.904 | 0.971 | 0.934 |
| 103959_at   | 0.324 | 1.125 | 1.026 | 0.959 | 1.130 |

|             |       |       |       |       |       |
|-------------|-------|-------|-------|-------|-------|
| 103960_at   | 0.454 | 0.810 | 0.769 | 0.873 | 0.802 |
| 103961_s_at | 0.352 | 0.904 | 0.846 | 0.920 | 0.849 |
| 103962_at   | 0.293 | 1.010 | 0.969 | 1.029 | 0.946 |
| 103963_f_at | 0.130 | 0.932 | 1.049 | 0.986 | 0.924 |
| 103964_at   | 0.472 | 0.992 | 0.984 | 1.014 | 0.969 |
| 103965_at   | 0.305 | 0.905 | 0.898 | 1.008 | 0.892 |
| 103967_at   | 0.323 | 1.034 | 1.082 | 1.107 | 1.173 |
| 103968_at   | 0.250 | 0.904 | 0.959 | 0.909 | 0.981 |
| 103969_at   | 0.227 | 1.438 | 1.333 | 1.087 | 1.186 |
| 103970_at   | 0.295 | 1.022 | 0.936 | 1.024 | 0.973 |
| 103971_at   | 0.074 | 0.870 | 0.935 | 0.974 | 0.906 |
| 103972_at   | 0.282 | 0.863 | 0.851 | 0.951 | 0.844 |
| 103973_at   | 0.259 | 0.848 | 0.826 | 0.917 | 0.930 |
| 103974_at   | 0.225 | 1.221 | 1.223 | 1.021 | 1.048 |
| 103975_at   | 0.375 | 1.128 | 1.079 | 1.033 | 1.109 |
| 103976_at   | 0.480 | 0.949 | 0.929 | 0.991 | 0.917 |
| 103977_at   | 0.076 | 0.917 | 1.382 | 0.911 | 1.056 |
| 103978_at   | 0.300 | 1.078 | 1.206 | 1.006 | 1.209 |
| 103980_at   | 0.436 | 1.019 | 0.968 | 1.029 | 1.022 |
| 103981_at   | 0.300 | 1.017 | 0.966 | 0.987 | 0.966 |
| 103982_s_at | 0.425 | 0.900 | 0.872 | 0.932 | 0.924 |
| 103983_at   | 0.484 | 0.906 | 0.858 | 0.897 | 0.857 |
| 103984_at   | 0.256 | 1.004 | 0.951 | 1.004 | 0.990 |
| 103985_at   | 0.303 | 0.770 | 0.759 | 0.838 | 0.752 |
| 103986_at   | 0.254 | 0.924 | 0.873 | 0.993 | 0.884 |
| 103987_at   | 0.454 | 0.839 | 0.832 | 0.904 | 0.806 |
| 103988_at   | 0.502 | 0.999 | 0.986 | 1.002 | 0.975 |
| 103989_at   | 0.367 | 1.023 | 1.013 | 1.090 | 1.007 |
| 103990_at   | 0.334 | 0.952 | 0.876 | 0.953 | 0.876 |
| 103991_at   | 0.480 | 0.863 | 0.842 | 0.919 | 0.854 |
| 103992_f_at | 0.291 | 0.879 | 0.786 | 0.895 | 0.867 |
| 103993_at   | 0.360 | 0.954 | 0.938 | 1.004 | 0.951 |
| 103994_at   | 0.193 | 1.090 | 1.009 | 0.873 | 1.189 |
| 103995_at   | 0.238 | 1.006 | 0.849 | 0.923 | 0.907 |
| 103997_at   | 0.400 | 0.891 | 0.874 | 0.938 | 0.867 |
| 103998_at   | 0.232 | 1.134 | 1.026 | 1.023 | 1.172 |
| 103999_at   | 0.290 | 1.050 | 0.957 | 1.061 | 0.973 |
| 104000_at   | 0.133 | 1.248 | 0.960 | 1.048 | 1.120 |
| 104001_at   | 0.472 | 0.860 | 0.826 | 0.893 | 0.818 |
| 104002_at   | 0.247 | 1.074 | 0.998 | 1.048 | 1.014 |
| 104003_at   | 0.139 | 0.925 | 0.916 | 1.034 | 0.921 |
| 104004_at   | 0.312 | 1.198 | 1.049 | 1.068 | 1.188 |
| 104005_at   | 0.148 | 0.967 | 0.939 | 1.010 | 0.995 |
| 104006_at   | 0.214 | 1.102 | 1.151 | 1.037 | 1.171 |
| 104007_at   | 0.509 | 1.052 | 1.059 | 1.053 | 1.060 |
| 104008_at   | 0.056 | 0.937 | 1.067 | 0.998 | 0.940 |
| 104010_at   | 0.347 | 0.953 | 0.950 | 0.935 | 0.975 |

|           |       |       |       |       |       |
|-----------|-------|-------|-------|-------|-------|
| 104011_at | 0.184 | 0.928 | 0.880 | 0.913 | 0.836 |
| 104012_at | 0.274 | 0.989 | 1.017 | 0.992 | 0.947 |
| 104013_at | 0.337 | 0.886 | 0.857 | 0.902 | 0.909 |
| 104014_at | 0.013 | 1.095 | 1.481 | 1.054 | 1.227 |
| 104015_at | 0.261 | 1.092 | 1.075 | 0.993 | 1.037 |
| 104016_at | 0.448 | 0.793 | 0.739 | 0.822 | 0.776 |
| 104017_at | 0.154 | 0.971 | 1.362 | 0.985 | 1.251 |
| 104018_at | 0.302 | 0.922 | 0.887 | 1.062 | 0.891 |
| 104019_at | 0.320 | 1.012 | 1.037 | 1.028 | 1.093 |
| 104020_at | 0.352 | 0.948 | 0.888 | 0.918 | 0.947 |
| 104021_at | 0.459 | 0.854 | 0.849 | 0.886 | 0.824 |
| 104022_at | 0.470 | 1.119 | 1.087 | 1.118 | 1.086 |
| 104023_at | 0.114 | 0.944 | 0.951 | 0.931 | 1.137 |
| 104024_at | 0.146 | 0.868 | 0.870 | 0.943 | 0.855 |
| 104025_at | 0.408 | 1.050 | 1.031 | 1.047 | 1.002 |
| 104029_at | 0.417 | 0.880 | 0.883 | 0.933 | 0.925 |
| 104030_at | 0.274 | 1.410 | 1.344 | 1.112 | 1.260 |
| 104031_at | 0.263 | 0.837 | 0.880 | 0.969 | 0.902 |
| 104032_at | 0.274 | 1.028 | 0.979 | 1.002 | 0.937 |
| 104033_at | 0.078 | 1.215 | 1.253 | 0.988 | 1.160 |
| 104034_at | 0.372 | 1.069 | 1.032 | 1.138 | 1.043 |
| 104035_at | 0.301 | 0.919 | 0.844 | 0.910 | 0.928 |
| 104036_at | 0.375 | 1.084 | 1.172 | 1.080 | 1.114 |
| 104037_at | 0.342 | 0.831 | 0.825 | 0.886 | 0.873 |
| 104038_at | 0.124 | 0.954 | 0.892 | 0.891 | 0.954 |
| 104039_at | 0.352 | 0.861 | 0.883 | 0.959 | 0.866 |
| 104040_at | 0.391 | 0.867 | 0.871 | 0.947 | 0.887 |
| 104041_at | 0.301 | 1.054 | 0.924 | 0.994 | 0.975 |
| 104042_at | 0.431 | 0.989 | 1.039 | 0.988 | 1.025 |
| 104044_at | 0.250 | 0.880 | 0.913 | 0.971 | 0.905 |
| 104045_at | 0.449 | 1.209 | 1.133 | 1.123 | 1.203 |
| 104046_at | 0.432 | 1.143 | 1.134 | 0.955 | 1.257 |
| 104047_at | 0.310 | 1.064 | 0.974 | 1.049 | 1.072 |
| 104048_at | 0.332 | 1.024 | 0.948 | 0.978 | 0.962 |
| 104049_at | 0.490 | 1.073 | 1.086 | 1.024 | 1.126 |
| 104050_at | 0.320 | 1.127 | 0.993 | 1.005 | 1.059 |
| 104052_at | 0.332 | 1.116 | 1.162 | 1.059 | 1.152 |
| 104053_at | 0.308 | 0.948 | 0.877 | 0.917 | 0.898 |
| 104055_at | 0.291 | 0.991 | 0.980 | 0.943 | 0.951 |
| 104056_at | 0.263 | 1.320 | 1.268 | 1.104 | 1.324 |
| 104057_at | 0.497 | 1.081 | 1.115 | 1.080 | 1.130 |
| 104058_at | 0.311 | 1.114 | 1.108 | 1.008 | 1.159 |
| 104059_at | 0.096 | 1.303 | 1.202 | 1.093 | 1.063 |
| 104060_at | 0.226 | 1.117 | 1.098 | 1.012 | 1.143 |
| 104063_at | 0.470 | 1.211 | 1.290 | 1.142 | 1.255 |
| 104064_at | 0.117 | 0.969 | 0.851 | 0.949 | 0.793 |
| 104065_at | 0.096 | 1.030 | 1.492 | 1.019 | 1.129 |

|             |       |       |       |       |       |
|-------------|-------|-------|-------|-------|-------|
| 104066_at   | 0.316 | 0.994 | 0.974 | 1.045 | 0.930 |
| 104067_at   | 0.334 | 1.140 | 1.077 | 0.977 | 1.169 |
| 104068_at   | 0.413 | 0.874 | 0.896 | 0.913 | 0.907 |
| 104069_at   | 0.362 | 0.987 | 0.969 | 0.989 | 1.012 |
| 104070_at   | 0.308 | 1.381 | 1.319 | 1.088 | 1.371 |
| 104071_at   | 0.379 | 1.377 | 1.365 | 1.194 | 1.361 |
| 104072_at   | 0.241 | 0.906 | 0.955 | 0.951 | 0.880 |
| 104073_at   | 0.355 | 0.891 | 0.881 | 0.945 | 0.916 |
| 104074_at   | 0.309 | 1.094 | 1.009 | 1.034 | 1.019 |
| 104076_at   | 0.298 | 1.083 | 1.023 | 1.030 | 1.095 |
| 104077_at   | 0.031 | 0.970 | 0.979 | 0.902 | 1.077 |
| 104078_g_at | 0.243 | 1.078 | 1.137 | 0.901 | 1.180 |
| 104079_at   | 0.400 | 1.259 | 1.237 | 1.120 | 1.229 |
| 104080_at   | 0.179 | 1.032 | 1.055 | 1.016 | 1.052 |
| 104082_at   | 0.154 | 1.163 | 1.088 | 0.972 | 1.148 |
| 104083_at   | 0.219 | 1.193 | 1.048 | 0.981 | 1.097 |
| 104085_at   | 0.314 | 0.960 | 0.917 | 1.002 | 0.917 |
| 104086_at   | 0.139 | 0.873 | 0.884 | 0.954 | 0.878 |
| 104087_at   | 0.353 | 0.970 | 0.958 | 1.014 | 1.021 |
| 104088_at   | 0.293 | 1.023 | 1.001 | 0.997 | 1.026 |
| 104089_at   | 0.125 | 1.095 | 0.974 | 0.895 | 1.147 |
| 104090_at   | 0.344 | 1.024 | 1.015 | 0.983 | 1.066 |
| 104091_at   | 0.091 | 1.025 | 0.933 | 0.963 | 0.931 |
| 104092_at   | 0.165 | 1.308 | 1.115 | 1.075 | 1.175 |
| 104093_at   | 0.097 | 1.060 | 1.196 | 1.002 | 1.197 |
| 104094_at   | 0.263 | 0.894 | 0.962 | 0.981 | 0.897 |
| 104095_at   | 0.387 | 1.052 | 1.007 | 1.038 | 1.023 |
| 104096_at   | 0.306 | 1.096 | 1.134 | 1.004 | 1.161 |
| 104097_at   | 0.026 | 0.988 | 1.051 | 0.908 | 1.119 |
| 104098_at   | 0.434 | 0.952 | 0.953 | 1.011 | 0.953 |
| 104099_at   | 0.051 | 1.029 | 1.057 | 1.541 | 0.766 |
| 104100_at   | 0.327 | 1.145 | 1.043 | 1.010 | 1.084 |
| 104101_at   | 0.478 | 1.019 | 1.015 | 1.007 | 0.988 |
| 104102_at   | 0.288 | 0.995 | 1.055 | 0.957 | 1.065 |
| 104103_at   | 0.495 | 0.910 | 0.921 | 0.948 | 0.916 |
| 104104_at   | 0.324 | 0.975 | 0.975 | 1.011 | 1.001 |
| 104105_at   | 0.319 | 1.131 | 1.154 | 1.094 | 1.085 |
| 104106_at   | 0.209 | 1.095 | 1.035 | 0.927 | 1.174 |
| 104108_at   | 0.151 | 1.170 | 1.133 | 1.029 | 1.154 |
| 104109_at   | 0.301 | 1.066 | 1.014 | 0.996 | 1.121 |
| 104110_at   | 0.263 | 1.045 | 1.132 | 1.115 | 1.050 |
| 104112_at   | 0.424 | 1.017 | 0.986 | 0.975 | 0.975 |
| 104114_at   | 0.495 | 1.053 | 1.056 | 0.998 | 1.091 |
| 104115_at   | 0.419 | 1.226 | 1.317 | 1.048 | 1.263 |
| 104116_at   | 0.266 | 1.194 | 1.146 | 1.087 | 1.458 |
| 104117_at   | 0.308 | 1.177 | 1.192 | 0.979 | 1.255 |
| 104118_at   | 0.321 | 1.151 | 1.137 | 1.021 | 1.196 |

|             |       |       |       |       |       |
|-------------|-------|-------|-------|-------|-------|
| 104119_at   | 0.365 | 1.236 | 1.200 | 1.035 | 1.304 |
| 104120_at   | 0.410 | 0.952 | 0.901 | 0.980 | 0.931 |
| 104121_at   | 0.053 | 0.960 | 0.880 | 1.095 | 0.845 |
| 104122_at   | 0.336 | 1.099 | 1.055 | 1.060 | 1.058 |
| 104123_at   | 0.406 | 0.841 | 0.850 | 0.860 | 0.787 |
| 104124_at   | 0.096 | 0.936 | 0.935 | 0.947 | 0.987 |
| 104125_at   | 0.323 | 1.121 | 1.066 | 1.031 | 1.149 |
| 104126_at   | 0.343 | 1.275 | 1.196 | 1.068 | 1.195 |
| 104128_at   | 0.218 | 1.021 | 1.070 | 1.083 | 1.019 |
| 104129_at   | 0.481 | 0.969 | 0.945 | 1.026 | 0.960 |
| 104131_at   | 0.056 | 0.954 | 0.911 | 1.003 | 0.860 |
| 104132_at   | 0.383 | 0.993 | 1.040 | 0.988 | 1.081 |
| 104134_at   | 0.324 | 0.931 | 0.943 | 0.968 | 0.976 |
| 104135_at   | 0.313 | 1.146 | 1.079 | 1.013 | 1.216 |
| 104136_at   | 0.292 | 0.954 | 0.914 | 0.984 | 0.972 |
| 104137_at   | 0.236 | 0.978 | 0.899 | 1.011 | 0.951 |
| 104138_at   | 0.164 | 1.022 | 0.963 | 1.042 | 0.978 |
| 104139_at   | 0.211 | 0.987 | 0.828 | 0.871 | 0.820 |
| 104140_s_at | 0.260 | 0.969 | 0.922 | 0.990 | 0.950 |
| 104141_at   | 0.402 | 1.054 | 1.025 | 1.060 | 1.035 |
| 104142_at   | 0.226 | 1.099 | 1.144 | 1.007 | 1.201 |
| 104143_at   | 0.261 | 1.095 | 1.017 | 1.116 | 1.082 |
| 104144_at   | 0.252 | 1.091 | 1.010 | 0.995 | 1.057 |
| 104145_at   | 0.490 | 0.940 | 0.936 | 0.966 | 0.938 |
| 104146_at   | 0.153 | 1.235 | 1.090 | 1.038 | 1.013 |
| 104147_at   | 0.071 | 0.927 | 1.211 | 0.971 | 1.024 |
| 104148_at   | 0.263 | 1.126 | 1.030 | 1.078 | 1.093 |
| 104149_at   | 0.174 | 1.113 | 1.203 | 1.045 | 0.946 |
| 104150_at   | 0.431 | 0.936 | 0.969 | 0.911 | 0.868 |
| 104151_at   | 0.337 | 1.019 | 0.953 | 0.975 | 0.905 |
| 104152_at   | 0.306 | 0.934 | 0.852 | 0.945 | 0.873 |
| 104153_at   | 0.316 | 1.119 | 1.063 | 1.140 | 1.084 |
| 104154_at   | 0.281 | 1.016 | 1.106 | 1.061 | 1.012 |
| 104155_f_at | 0.291 | 1.090 | 1.169 | 1.011 | 1.045 |
| 104156_r_at | 0.480 | 0.815 | 0.808 | 0.873 | 0.780 |
| 104157_at   | 0.363 | 0.999 | 0.975 | 1.006 | 1.022 |
| 104158_at   | 0.211 | 1.278 | 1.263 | 1.082 | 1.158 |
| 104159_at   | 0.322 | 0.916 | 0.888 | 0.936 | 0.951 |
| 104160_at   | 0.232 | 0.809 | 0.836 | 0.956 | 0.847 |
| 104161_at   | 0.304 | 0.971 | 0.994 | 1.016 | 1.051 |
| 104163_at   | 0.139 | 1.310 | 1.193 | 1.061 | 1.241 |
| 104164_at   | 0.107 | 1.000 | 0.978 | 1.027 | 0.914 |
| 104165_at   | 0.187 | 1.141 | 0.988 | 1.020 | 1.142 |
| 104166_at   | 0.355 | 0.862 | 0.805 | 0.926 | 0.846 |
| 104168_at   | 0.274 | 0.872 | 0.949 | 0.945 | 0.952 |
| 104169_at   | 0.438 | 0.886 | 0.858 | 0.909 | 0.835 |
| 104170_at   | 0.454 | 0.927 | 0.859 | 0.983 | 0.899 |

|             |       |       |       |       |       |
|-------------|-------|-------|-------|-------|-------|
| 104171_f_at | 0.216 | 0.745 | 0.755 | 0.884 | 0.719 |
| 104172_at   | 0.035 | 0.879 | 1.328 | 0.988 | 0.974 |
| 104173_at   | 0.062 | 0.932 | 1.065 | 0.886 | 0.902 |
| 104174_at   | 0.226 | 1.033 | 1.054 | 1.040 | 1.115 |
| 104175_at   | 0.361 | 0.930 | 0.880 | 0.958 | 0.858 |
| 104176_at   | 0.308 | 1.076 | 1.028 | 0.982 | 0.982 |
| 104177_at   | 0.371 | 1.134 | 1.169 | 1.091 | 1.223 |
| 104179_at   | 0.234 | 1.264 | 1.161 | 0.911 | 1.426 |
| 104180_at   | 0.211 | 1.026 | 0.899 | 0.978 | 0.974 |
| 104181_at   | 0.265 | 0.870 | 0.784 | 0.916 | 0.857 |
| 104182_at   | 0.275 | 0.929 | 0.974 | 0.967 | 0.967 |
| 104183_at   | 0.144 | 1.100 | 0.998 | 1.040 | 1.032 |
| 104184_at   | 0.410 | 0.798 | 0.805 | 0.968 | 0.812 |
| 104185_at   | 0.318 | 0.860 | 0.868 | 0.938 | 0.920 |
| 104186_at   | 0.314 | 0.996 | 0.902 | 0.871 | 0.950 |
| 104187_at   | 0.353 | 1.003 | 0.916 | 0.967 | 0.940 |
| 104188_at   | 0.380 | 1.086 | 1.006 | 1.042 | 1.041 |
| 104189_at   | 0.320 | 1.316 | 1.282 | 1.109 | 1.274 |
| 104190_at   | 0.415 | 1.000 | 0.962 | 0.959 | 0.956 |
| 104191_at   | 0.402 | 0.852 | 0.826 | 0.923 | 0.856 |
| 104192_at   | 0.347 | 0.895 | 0.845 | 0.875 | 0.912 |
| 104193_at   | 0.160 | 1.138 | 1.130 | 0.946 | 1.235 |
| 104194_at   | 0.284 | 1.000 | 0.965 | 0.985 | 1.090 |
| 104195_at   | 0.152 | 0.988 | 0.958 | 0.924 | 1.011 |
| 104196_at   | 0.361 | 1.105 | 1.028 | 1.079 | 1.083 |
| 104197_at   | 0.301 | 0.915 | 0.889 | 1.007 | 0.963 |
| 104198_at   | 0.445 | 1.000 | 0.990 | 0.993 | 1.003 |
| 104199_at   | 0.349 | 0.892 | 0.811 | 0.944 | 0.858 |
| 104200_at   | 0.192 | 0.986 | 0.875 | 1.041 | 0.917 |
| 104201_at   | 0.392 | 0.877 | 0.815 | 0.886 | 0.827 |
| 104202_at   | 0.465 | 1.099 | 1.066 | 1.056 | 1.087 |
| 104205_at   | 0.119 | 0.909 | 0.783 | 1.177 | 0.834 |
| 104206_at   | 0.182 | 1.149 | 1.006 | 1.035 | 0.989 |
| 104207_at   | 0.083 | 1.288 | 1.209 | 1.127 | 1.135 |
| 104208_at   | 0.454 | 1.107 | 1.106 | 1.051 | 1.097 |
| 104209_at   | 0.151 | 0.989 | 0.969 | 1.030 | 1.034 |
| 104210_at   | 0.359 | 1.185 | 1.074 | 1.148 | 1.095 |
| 104211_at   | 0.072 | 0.855 | 0.861 | 1.073 | 0.929 |
| 104212_at   | 0.454 | 1.233 | 1.207 | 1.142 | 1.193 |
| 104213_at   | 0.208 | 0.861 | 0.829 | 0.959 | 0.846 |
| 104214_at   | 0.291 | 0.968 | 1.111 | 1.041 | 1.003 |
| 104215_at   | 0.301 | 1.233 | 1.193 | 1.135 | 1.078 |
| 104216_at   | 0.254 | 0.898 | 0.912 | 0.914 | 0.999 |
| 104217_at   | 0.486 | 0.928 | 0.927 | 0.922 | 0.906 |
| 104218_s_at | 0.133 | 0.947 | 0.890 | 0.984 | 1.018 |
| 104219_f_at | 0.397 | 0.952 | 0.889 | 0.900 | 0.913 |
| 104220_at   | 0.269 | 1.150 | 1.043 | 1.021 | 1.028 |



|             |       |       |       |       |       |
|-------------|-------|-------|-------|-------|-------|
| 104221_at   | 0.475 | 0.941 | 0.921 | 0.924 | 0.899 |
| 104222_f_at | 0.233 | 0.886 | 0.842 | 0.934 | 0.950 |
| 104225_at   | 0.297 | 1.043 | 0.958 | 1.003 | 1.086 |
| 104227_at   | 0.348 | 0.932 | 0.931 | 0.992 | 0.957 |
| 104228_at   | 0.163 | 0.908 | 0.983 | 0.870 | 1.106 |
| 104229_at   | 0.368 | 0.888 | 0.815 | 0.925 | 0.883 |
| 104230_at   | 0.234 | 0.924 | 0.892 | 0.889 | 0.959 |
| 104231_at   | 0.183 | 1.045 | 1.009 | 0.941 | 0.955 |
| 104232_at   | 0.143 | 0.913 | 0.800 | 1.019 | 0.892 |
| 104233_at   | 0.188 | 0.923 | 0.926 | 0.982 | 0.876 |
| 104234_at   | 0.330 | 0.904 | 0.942 | 0.913 | 0.959 |
| 104235_at   | 0.234 | 1.178 | 1.030 | 1.064 | 1.048 |
| 104237_at   | 0.375 | 1.073 | 1.061 | 1.001 | 1.079 |
| 104238_at   | 0.369 | 0.844 | 0.878 | 0.931 | 0.900 |
| 104239_at   | 0.116 | 0.883 | 0.919 | 0.815 | 0.922 |
| 104240_at   | 0.320 | 0.928 | 0.891 | 0.980 | 0.925 |
| 104241_at   | 0.233 | 1.393 | 1.283 | 1.116 | 1.291 |
| 104242_f_at | 0.419 | 0.905 | 0.895 | 0.950 | 0.936 |
| 104243_r_at | 0.407 | 1.001 | 1.015 | 1.048 | 0.990 |
| 104244_at   | 0.149 | 1.068 | 0.997 | 1.043 | 0.916 |
| 104245_at   | 0.253 | 0.966 | 0.913 | 0.987 | 0.975 |
| 104246_at   | 0.205 | 1.069 | 1.004 | 1.070 | 0.973 |
| 104247_at   | 0.384 | 0.970 | 0.950 | 0.986 | 0.936 |
| 104248_at   | 0.117 | 0.823 | 0.977 | 0.975 | 0.975 |
| 104249_g_at | 0.182 | 0.691 | 1.087 | 1.026 | 1.058 |
| 104250_at   | 0.224 | 1.060 | 0.981 | 0.976 | 0.915 |
| 104252_at   | 0.108 | 1.625 | 1.407 | 1.193 | 1.410 |
| 104253_at   | 0.035 | 1.051 | 0.964 | 1.090 | 0.981 |
| 104254_at   | 0.448 | 0.906 | 0.875 | 0.922 | 0.892 |
| 104255_at   | 0.379 | 0.823 | 0.790 | 0.878 | 0.822 |
| 104256_at   | 0.109 | 0.982 | 1.224 | 0.923 | 1.199 |
| 104257_g_at | 0.150 | 1.097 | 1.313 | 0.925 | 1.389 |
| 104258_at   | 0.246 | 0.870 | 0.801 | 0.947 | 0.956 |
| 104259_at   | 0.223 | 0.959 | 0.971 | 1.022 | 0.998 |
| 104260_at   | 0.328 | 1.288 | 1.220 | 1.108 | 1.261 |
| 104261_at   | 0.497 | 1.038 | 1.067 | 1.031 | 1.076 |
| 104262_at   | 0.081 | 0.922 | 0.868 | 1.002 | 0.928 |
| 104263_at   | 0.181 | 1.240 | 1.097 | 1.099 | 1.114 |
| 104264_at   | 0.454 | 1.176 | 1.239 | 1.118 | 1.167 |
| 104265_at   | 0.298 | 1.153 | 0.975 | 0.923 | 1.106 |
| 104266_at   | 0.246 | 1.083 | 0.989 | 1.024 | 0.971 |
| 104267_at   | 0.091 | 1.116 | 0.982 | 1.100 | 0.950 |
| 104268_at   | 0.348 | 1.041 | 0.977 | 1.041 | 1.090 |
| 104269_at   | 0.236 | 0.896 | 0.813 | 0.943 | 0.826 |
| 104270_at   | 0.246 | 0.931 | 1.034 | 0.945 | 0.970 |
| 104271_at   | 0.315 | 0.902 | 0.893 | 0.960 | 0.852 |
| 104272_s_at | 0.325 | 1.043 | 1.023 | 1.011 | 1.093 |

|             |       |       |       |       |       |
|-------------|-------|-------|-------|-------|-------|
| 104273_at   | 0.201 | 0.908 | 0.896 | 0.988 | 0.871 |
| 104274_at   | 0.317 | 1.125 | 1.083 | 1.067 | 1.114 |
| 104275_g_at | 0.322 | 0.950 | 0.938 | 1.047 | 0.887 |
| 104276_at   | 0.147 | 0.927 | 1.030 | 0.988 | 0.991 |
| 104277_at   | 0.204 | 1.036 | 0.948 | 1.066 | 0.947 |
| 104279_at   | 0.261 | 1.023 | 1.026 | 0.952 | 1.018 |
| 104280_at   | 0.264 | 0.837 | 0.736 | 1.025 | 0.815 |
| 104282_at   | 0.026 | 0.939 | 0.877 | 0.978 | 0.968 |
| 104283_at   | 0.224 | 1.182 | 1.104 | 1.056 | 1.179 |
| 104284_at   | 0.096 | 0.902 | 0.962 | 0.942 | 0.918 |
| 104285_at   | 0.319 | 1.102 | 1.088 | 0.994 | 1.073 |
| 104286_at   | 0.224 | 0.859 | 0.867 | 0.970 | 0.949 |
| 104287_at   | 0.379 | 1.080 | 1.032 | 1.067 | 1.066 |
| 104288_at   | 0.345 | 1.180 | 1.211 | 1.068 | 1.232 |
| 104289_at   | 0.388 | 0.873 | 0.883 | 0.941 | 0.884 |
| 104290_at   | 0.420 | 1.243 | 1.368 | 1.084 | 1.294 |
| 104291_at   | 0.326 | 0.900 | 0.929 | 0.950 | 0.955 |
| 104292_at   | 0.165 | 1.014 | 0.964 | 0.956 | 0.891 |
| 104293_at   | 0.314 | 1.086 | 1.064 | 1.059 | 1.007 |
| 104294_at   | 0.246 | 1.110 | 1.156 | 0.945 | 1.094 |
| 104296_at   | 0.119 | 1.116 | 1.020 | 0.924 | 1.087 |
| 104297_at   | 0.244 | 0.925 | 1.016 | 0.948 | 1.015 |
| 104298_at   | 0.292 | 1.224 | 1.123 | 1.076 | 1.100 |
| 104299_at   | 0.106 | 1.023 | 0.902 | 0.873 | 0.880 |
| 104300_at   | 0.099 | 1.479 | 1.397 | 1.157 | 1.228 |
| 104301_at   | 0.287 | 0.952 | 0.948 | 0.947 | 1.014 |
| 104302_f_at | 0.291 | 0.889 | 0.880 | 0.901 | 0.930 |
| 104303_i_at | 0.093 | 0.908 | 1.023 | 0.932 | 0.939 |
| 104304_r_at | 0.197 | 1.071 | 1.091 | 0.963 | 1.164 |
| 104305_at   | 0.334 | 1.332 | 1.333 | 1.107 | 1.224 |
| 104306_at   | 0.120 | 1.077 | 1.116 | 1.048 | 1.157 |
| 104308_at   | 0.110 | 1.190 | 1.706 | 1.075 | 1.529 |
| 104310_at   | 0.186 | 0.929 | 0.933 | 1.013 | 0.900 |
| 104311_at   | 0.233 | 1.190 | 1.126 | 0.998 | 1.093 |
| 104312_at   | 0.232 | 0.916 | 0.829 | 0.920 | 0.866 |
| 104313_at   | 0.483 | 1.101 | 1.125 | 1.127 | 1.150 |
| 104314_r_at | 0.314 | 0.854 | 0.729 | 0.796 | 0.902 |
| 104315_at   | 0.290 | 1.236 | 1.235 | 1.083 | 1.169 |
| 104316_at   | 0.394 | 1.167 | 1.151 | 1.007 | 1.242 |
| 104317_at   | 0.401 | 1.113 | 1.130 | 1.018 | 1.117 |
| 104318_at   | 0.441 | 0.959 | 0.895 | 0.975 | 0.940 |
| 104320_at   | 0.119 | 1.033 | 1.007 | 1.043 | 0.905 |
| 104322_at   | 0.175 | 0.981 | 1.007 | 0.982 | 1.147 |
| 104323_at   | 0.481 | 0.908 | 0.883 | 0.946 | 0.910 |
| 104324_at   | 0.292 | 1.090 | 0.944 | 1.017 | 1.018 |
| 104325_at   | 0.313 | 0.828 | 0.803 | 1.153 | 0.843 |
| 104326_at   | 0.496 | 0.975 | 0.966 | 0.978 | 0.984 |

|             |       |       |       |       |       |
|-------------|-------|-------|-------|-------|-------|
| 104327_at   | 0.323 | 1.321 | 1.242 | 1.084 | 1.175 |
| 104328_at   | 0.497 | 0.889 | 0.883 | 0.898 | 0.879 |
| 104329_at   | 0.449 | 0.904 | 0.861 | 0.906 | 0.901 |
| 104330_g_at | 0.282 | 1.204 | 1.064 | 1.093 | 1.049 |
| 104331_at   | 0.237 | 1.252 | 1.154 | 1.039 | 1.171 |
| 104332_at   | 0.483 | 0.955 | 0.940 | 0.970 | 0.963 |
| 104333_at   | 0.238 | 1.476 | 2.192 | 1.458 | 1.889 |
| 104334_at   | 0.287 | 1.002 | 0.932 | 0.909 | 0.954 |
| 104335_at   | 0.120 | 0.966 | 0.865 | 0.957 | 0.901 |
| 104336_at   | 0.193 | 0.883 | 0.883 | 1.002 | 0.951 |
| 104337_f_at | 0.261 | 1.230 | 1.115 | 0.991 | 1.178 |
| 104338_r_at | 0.199 | 1.050 | 0.997 | 1.079 | 0.916 |
| 104339_at   | 0.385 | 1.159 | 1.097 | 1.098 | 1.069 |
| 104340_at   | 0.480 | 1.078 | 1.103 | 1.117 | 1.099 |
| 104341_at   | 0.234 | 0.950 | 0.995 | 0.965 | 0.996 |
| 104342_i_at | 0.301 | 1.106 | 1.029 | 1.111 | 1.038 |
| 104343_f_at | 0.379 | 1.138 | 1.064 | 1.051 | 1.183 |
| 104344_at   | 0.318 | 0.927 | 0.902 | 0.987 | 0.933 |
| 104345_at   | 0.243 | 0.926 | 0.924 | 0.962 | 0.957 |
| 104346_at   | 0.265 | 1.004 | 1.021 | 1.069 | 1.037 |
| 104348_at   | 0.290 | 1.046 | 1.127 | 1.090 | 1.104 |
| 104349_at   | 0.240 | 1.039 | 1.056 | 0.985 | 1.046 |
| 104350_at   | 0.301 | 1.035 | 1.138 | 1.140 | 1.111 |
| 104351_at   | 0.025 | 0.983 | 1.091 | 0.943 | 0.973 |
| 104352_at   | 0.158 | 1.247 | 1.131 | 1.029 | 1.132 |
| 104353_at   | 0.323 | 0.917 | 0.810 | 0.844 | 0.839 |
| 104354_at   | 0.114 | 1.221 | 1.592 | 1.183 | 1.269 |
| 104355_at   | 0.419 | 1.026 | 1.016 | 1.019 | 1.055 |
| 104356_at   | 0.452 | 0.983 | 0.996 | 0.963 | 0.968 |
| 104358_at   | 0.138 | 0.992 | 0.903 | 1.071 | 0.924 |
| 104360_at   | 0.230 | 1.076 | 1.016 | 1.086 | 1.055 |
| 104361_at   | 0.272 | 0.921 | 0.890 | 0.916 | 0.970 |
| 104362_at   | 0.470 | 0.973 | 0.949 | 0.998 | 0.967 |
| 104363_at   | 0.353 | 0.857 | 0.875 | 0.982 | 0.886 |
| 104364_at   | 0.161 | 1.064 | 0.949 | 0.973 | 0.924 |
| 104365_at   | 0.325 | 1.104 | 1.241 | 1.028 | 1.090 |
| 104366_at   | 0.320 | 1.267 | 1.225 | 1.041 | 1.136 |
| 104367_at   | 0.253 | 1.386 | 1.377 | 1.105 | 1.313 |
| 104368_at   | 0.218 | 1.145 | 1.018 | 1.167 | 1.007 |
| 104369_at   | 0.212 | 0.908 | 0.884 | 1.007 | 0.910 |
| 104370_s_at | 0.196 | 0.866 | 0.856 | 0.961 | 0.891 |
| 104371_at   | 0.143 | 0.977 | 0.805 | 1.163 | 0.949 |
| 104372_at   | 0.236 | 1.077 | 1.020 | 1.044 | 0.993 |
| 104373_at   | 0.059 | 1.032 | 1.008 | 1.082 | 1.043 |
| 104374_at   | 0.035 | 0.991 | 2.158 | 1.095 | 1.140 |
| 104375_at   | 0.249 | 1.236 | 1.007 | 1.121 | 1.082 |
| 104376_at   | 0.158 | 1.082 | 1.001 | 1.014 | 0.957 |

|             |       |       |       |       |       |
|-------------|-------|-------|-------|-------|-------|
| 104378_at   | 0.165 | 1.201 | 1.193 | 0.974 | 1.161 |
| 104380_at   | 0.318 | 1.270 | 1.336 | 1.102 | 1.188 |
| 104381_at   | 0.384 | 1.109 | 1.046 | 1.033 | 1.090 |
| 104382_at   | 0.250 | 0.931 | 0.901 | 0.973 | 0.961 |
| 104383_at   | 0.472 | 0.899 | 0.867 | 0.935 | 0.874 |
| 104385_i_at | 0.401 | 0.865 | 0.834 | 0.935 | 0.829 |
| 104386_f_at | 0.105 | 1.423 | 1.322 | 1.073 | 1.236 |
| 104387_at   | 0.239 | 1.001 | 0.899 | 0.954 | 0.946 |
| 104388_at   | 0.035 | 1.290 | 3.302 | 1.314 | 2.354 |
| 104389_at   | 0.412 | 1.135 | 1.144 | 1.134 | 1.107 |
| 104390_at   | 0.267 | 1.086 | 0.972 | 0.935 | 1.023 |
| 104391_s_at | 0.496 | 0.897 | 0.885 | 0.928 | 0.896 |
| 104392_at   | 0.508 | 0.998 | 0.994 | 1.015 | 0.993 |
| 104393_at   | 0.433 | 1.020 | 1.014 | 1.025 | 1.079 |
| 104394_at   | 0.176 | 0.894 | 0.870 | 0.931 | 0.968 |
| 104395_at   | 0.195 | 1.154 | 1.054 | 1.045 | 1.062 |
| 104396_at   | 0.275 | 0.997 | 0.997 | 1.021 | 1.051 |
| 104398_at   | 0.403 | 0.927 | 0.905 | 0.978 | 0.919 |
| 104399_at   | 0.481 | 1.237 | 1.264 | 1.065 | 1.326 |
| 104400_at   | 0.440 | 0.970 | 1.058 | 1.039 | 1.015 |
| 104401_at   | 0.369 | 0.905 | 0.892 | 0.962 | 0.914 |
| 104402_at   | 0.158 | 1.168 | 1.121 | 0.976 | 1.243 |
| 104403_at   | 0.350 | 1.088 | 1.074 | 1.030 | 1.179 |
| 104404_at   | 0.096 | 1.069 | 1.137 | 1.036 | 1.218 |
| 104405_at   | 0.470 | 0.940 | 0.968 | 0.935 | 0.955 |
| 104406_at   | 0.183 | 0.897 | 1.039 | 1.005 | 0.937 |
| 104407_at   | 0.297 | 1.205 | 1.094 | 0.986 | 1.209 |
| 104408_s_at | 0.215 | 1.026 | 0.909 | 1.006 | 1.026 |
| 104409_at   | 0.422 | 0.976 | 0.920 | 0.982 | 0.941 |
| 104410_at   | 0.281 | 1.219 | 1.067 | 1.102 | 0.998 |
| 104411_at   | 0.461 | 0.936 | 0.882 | 0.953 | 0.878 |
| 104412_at   | 0.323 | 1.147 | 1.110 | 1.205 | 1.185 |
| 104413_at   | 0.273 | 1.031 | 1.017 | 1.142 | 1.073 |
| 104414_at   | 0.319 | 0.976 | 0.915 | 1.021 | 0.934 |
| 104415_at   | 0.220 | 1.090 | 0.961 | 1.013 | 0.961 |
| 104416_at   | 0.184 | 0.839 | 0.850 | 1.003 | 0.888 |
| 104417_at   | 0.241 | 1.117 | 1.062 | 1.050 | 0.976 |
| 104418_at   | 0.459 | 1.132 | 1.153 | 1.089 | 1.166 |
| 104419_at   | 0.250 | 1.243 | 1.169 | 1.104 | 1.126 |
| 104420_at   | 0.307 | 0.862 | 0.880 | 0.927 | 0.934 |
| 104421_at   | 0.034 | 1.166 | 0.444 | 1.086 | 0.701 |
| 104422_at   | 0.415 | 0.901 | 0.871 | 0.946 | 0.908 |
| 104423_at   | 0.309 | 0.910 | 0.911 | 0.920 | 0.953 |
| 104424_at   | 0.379 | 0.847 | 0.796 | 0.913 | 0.826 |
| 104425_at   | 0.119 | 1.047 | 0.915 | 0.932 | 1.055 |
| 104427_at   | 0.463 | 1.149 | 1.140 | 1.092 | 1.136 |
| 104428_s_at | 0.454 | 0.853 | 0.866 | 0.891 | 0.858 |

|             |       |       |       |       |       |
|-------------|-------|-------|-------|-------|-------|
| 104429_at   | 0.301 | 0.881 | 0.926 | 0.877 | 0.892 |
| 104430_at   | 0.508 | 0.934 | 0.923 | 0.947 | 0.926 |
| 104431_at   | 0.422 | 0.914 | 0.902 | 0.935 | 0.933 |
| 104432_at   | 0.219 | 0.939 | 0.971 | 1.016 | 1.001 |
| 104433_at   | 0.231 | 0.867 | 0.937 | 1.019 | 0.972 |
| 104434_at   | 0.286 | 1.028 | 0.978 | 1.003 | 0.993 |
| 104435_at   | 0.248 | 0.956 | 0.890 | 0.987 | 0.969 |
| 104436_at   | 0.322 | 0.949 | 0.904 | 0.984 | 0.941 |
| 104437_at   | 0.077 | 1.083 | 0.960 | 1.018 | 1.004 |
| 104438_at   | 0.494 | 0.883 | 0.832 | 0.911 | 0.838 |
| 104439_at   | 0.184 | 0.990 | 0.887 | 0.982 | 0.897 |
| 104440_at   | 0.236 | 0.849 | 0.825 | 0.939 | 0.803 |
| 104441_at   | 0.495 | 0.847 | 0.857 | 0.884 | 0.873 |
| 104442_at   | 0.246 | 0.964 | 0.888 | 0.964 | 0.982 |
| 104443_at   | 0.269 | 0.875 | 0.888 | 0.847 | 0.939 |
| 104444_at   | 0.318 | 1.058 | 1.018 | 0.994 | 1.046 |
| 104445_at   | 0.224 | 0.923 | 0.830 | 1.109 | 0.879 |
| 104446_f_at | 0.331 | 0.992 | 0.937 | 0.930 | 0.942 |
| 104447_r_at | 0.360 | 1.086 | 1.072 | 1.008 | 1.128 |
| 104448_at   | 0.407 | 1.008 | 0.970 | 1.014 | 0.981 |
| 104449_at   | 0.475 | 0.901 | 0.920 | 0.931 | 0.921 |
| 104450_at   | 0.478 | 0.905 | 0.900 | 0.949 | 0.896 |
| 104451_at   | 0.117 | 1.201 | 0.963 | 1.188 | 1.017 |
| 104452_at   | 0.383 | 0.823 | 0.861 | 0.918 | 0.855 |
| 104453_at   | 0.104 | 1.034 | 0.905 | 0.965 | 0.882 |
| 104454_at   | 0.156 | 0.966 | 1.026 | 0.948 | 1.012 |
| 104455_at   | 0.380 | 0.854 | 0.811 | 0.891 | 0.838 |
| 104456_at   | 0.392 | 1.049 | 1.062 | 1.114 | 1.052 |
| 104457_at   | 0.377 | 0.895 | 0.880 | 0.918 | 0.935 |
| 104458_at   | 0.273 | 0.966 | 0.904 | 1.019 | 0.933 |
| 104460_at   | 0.124 | 0.869 | 0.800 | 0.934 | 0.829 |
| 104461_at   | 0.323 | 1.058 | 1.016 | 1.033 | 1.015 |
| 104462_at   | 0.092 | 0.914 | 0.899 | 1.000 | 0.838 |
| 104463_at   | 0.508 | 0.895 | 0.887 | 0.920 | 0.881 |
| 104464_s_at | 0.211 | 1.090 | 1.436 | 1.147 | 1.276 |
| 104466_at   | 0.497 | 0.985 | 0.995 | 1.009 | 0.997 |
| 104467_at   | 0.490 | 1.109 | 1.124 | 1.034 | 1.142 |
| 104468_at   | 0.505 | 0.810 | 0.796 | 0.853 | 0.786 |
| 104469_at   | 0.243 | 1.100 | 1.020 | 0.940 | 1.008 |
| 104470_at   | 0.124 | 1.100 | 1.059 | 0.978 | 1.103 |
| 104471_at   | 0.363 | 1.051 | 0.984 | 1.055 | 1.012 |
| 104473_at   | 0.151 | 0.923 | 0.910 | 1.008 | 0.949 |
| 104474_s_at | 0.470 | 0.911 | 0.872 | 0.954 | 0.877 |
| 104475_at   | 0.434 | 0.946 | 1.008 | 0.980 | 1.011 |
| 104476_at   | 0.155 | 1.073 | 1.050 | 0.979 | 1.239 |
| 104477_at   | 0.067 | 1.501 | 1.977 | 1.175 | 1.648 |
| 104479_at   | 0.410 | 0.909 | 0.900 | 0.950 | 0.939 |

|             |       |       |       |       |       |
|-------------|-------|-------|-------|-------|-------|
| 104480_at   | 0.148 | 1.006 | 0.952 | 1.034 | 0.933 |
| 104481_at   | 0.495 | 0.966 | 0.944 | 1.014 | 0.925 |
| 104482_at   | 0.205 | 0.947 | 0.902 | 0.990 | 0.892 |
| 104483_at   | 0.411 | 0.844 | 0.828 | 0.922 | 0.855 |
| 104484_at   | 0.387 | 0.942 | 0.873 | 0.947 | 0.909 |
| 104485_at   | 0.500 | 0.975 | 0.969 | 0.982 | 0.980 |
| 104486_at   | 0.097 | 0.974 | 0.934 | 1.055 | 0.942 |
| 104487_at   | 0.149 | 0.970 | 0.936 | 0.948 | 1.047 |
| 104488_at   | 0.332 | 0.943 | 0.875 | 0.980 | 0.910 |
| 104489_at   | 0.417 | 0.957 | 0.904 | 0.974 | 0.965 |
| 104491_at   | 0.243 | 1.042 | 0.961 | 0.991 | 1.053 |
| 104492_at   | 0.110 | 0.913 | 0.837 | 0.997 | 0.895 |
| 104493_at   | 0.449 | 0.866 | 0.831 | 0.892 | 0.831 |
| 104494_at   | 0.284 | 1.255 | 1.480 | 1.108 | 1.386 |
| 104495_f_at | 0.224 | 0.838 | 0.905 | 0.881 | 0.867 |
| 104496_i_at | 0.484 | 0.886 | 0.886 | 0.919 | 0.849 |
| 104497_f_at | 0.377 | 0.939 | 0.975 | 0.967 | 0.947 |
| 104498_at   | 0.351 | 0.943 | 0.879 | 0.938 | 0.942 |
| 104499_at   | 0.280 | 0.859 | 0.856 | 0.904 | 0.900 |
| 104500_at   | 0.056 | 1.096 | 1.003 | 1.118 | 1.102 |
| 104501_at   | 0.336 | 1.142 | 1.111 | 1.017 | 1.105 |
| 104502_f_at | 0.484 | 1.063 | 1.057 | 1.072 | 1.025 |
| 104503_at   | 0.303 | 0.949 | 0.968 | 1.002 | 1.015 |
| 104504_at   | 0.486 | 0.915 | 0.906 | 0.958 | 0.909 |
| 104505_at   | 0.436 | 0.878 | 0.843 | 0.878 | 0.883 |
| 104506_at   | 0.465 | 0.941 | 0.898 | 0.941 | 0.897 |
| 104507_g_at | 0.318 | 0.876 | 0.815 | 0.949 | 0.839 |
| 104508_at   | 0.347 | 0.799 | 0.833 | 0.840 | 0.839 |
| 104509_at   | 0.144 | 0.999 | 1.327 | 1.026 | 1.130 |
| 104510_at   | 0.080 | 0.950 | 0.903 | 0.949 | 0.985 |
| 104512_at   | 0.102 | 1.222 | 0.841 | 0.896 | 1.032 |
| 104513_at   | 0.246 | 1.093 | 1.016 | 0.984 | 1.131 |
| 104514_at   | 0.378 | 1.067 | 1.038 | 1.015 | 1.003 |
| 104515_at   | 0.458 | 0.905 | 0.900 | 0.932 | 0.936 |
| 104516_at   | 0.366 | 1.082 | 1.150 | 0.922 | 1.126 |
| 104518_at   | 0.492 | 0.866 | 0.871 | 0.902 | 0.847 |
| 104519_at   | 0.196 | 0.993 | 1.038 | 1.128 | 1.120 |
| 104522_at   | 0.426 | 1.035 | 1.025 | 1.007 | 0.990 |
| 104523_at   | 0.330 | 0.994 | 1.066 | 0.963 | 1.035 |
| 104524_at   | 0.145 | 0.962 | 1.029 | 1.064 | 0.991 |
| 104525_at   | 0.231 | 1.067 | 1.086 | 1.018 | 1.001 |
| 104526_at   | 0.234 | 0.932 | 0.871 | 0.913 | 0.837 |
| 104527_at   | 0.142 | 0.953 | 1.055 | 0.970 | 1.034 |
| 104528_at   | 0.136 | 0.954 | 0.875 | 0.963 | 0.923 |
| 104529_at   | 0.351 | 1.081 | 1.063 | 0.987 | 1.144 |
| 104531_at   | 0.117 | 1.103 | 1.293 | 1.058 | 1.173 |
| 104532_at   | 0.412 | 0.973 | 0.928 | 0.980 | 0.942 |

|             |       |       |       |       |       |
|-------------|-------|-------|-------|-------|-------|
| 104533_at   | 0.477 | 1.007 | 1.036 | 1.005 | 0.993 |
| 104534_at   | 0.390 | 1.259 | 1.212 | 1.067 | 1.227 |
| 104535_at   | 0.412 | 1.124 | 1.088 | 1.016 | 1.172 |
| 104536_at   | 0.388 | 1.159 | 1.124 | 1.099 | 1.261 |
| 104537_at   | 0.484 | 0.984 | 0.996 | 1.029 | 0.986 |
| 104538_at   | 0.092 | 1.218 | 1.121 | 1.016 | 1.043 |
| 104539_at   | 0.394 | 0.896 | 0.838 | 0.929 | 0.901 |
| 104541_at   | 0.486 | 0.779 | 0.778 | 0.849 | 0.748 |
| 104544_at   | 0.320 | 0.889 | 0.844 | 0.921 | 0.921 |
| 104545_at   | 0.190 | 0.925 | 0.876 | 0.872 | 1.027 |
| 104546_g_at | 0.492 | 0.905 | 0.906 | 0.940 | 0.908 |
| 104547_at   | 0.426 | 0.959 | 0.956 | 0.937 | 0.933 |
| 104548_at   | 0.379 | 0.935 | 0.990 | 0.952 | 0.965 |
| 104549_at   | 0.470 | 1.151 | 1.128 | 1.117 | 1.143 |
| 104550_at   | 0.056 | 1.292 | 1.079 | 1.120 | 1.064 |
| 104551_at   | 0.484 | 0.908 | 0.861 | 0.911 | 0.877 |
| 104554_at   | 0.092 | 1.081 | 1.030 | 1.110 | 0.976 |
| 104555_at   | 0.335 | 0.863 | 0.845 | 0.999 | 0.838 |
| 104556_at   | 0.369 | 0.950 | 0.969 | 1.004 | 0.947 |
| 104557_at   | 0.193 | 0.970 | 0.993 | 0.940 | 1.112 |
| 104558_at   | 0.294 | 1.296 | 1.183 | 1.081 | 1.236 |
| 104559_at   | 0.219 | 1.027 | 0.982 | 0.953 | 1.011 |
| 104560_at   | 0.370 | 1.012 | 1.002 | 1.006 | 0.985 |
| 104561_at   | 0.474 | 0.973 | 0.974 | 0.955 | 0.985 |
| 104562_at   | 0.275 | 1.078 | 1.091 | 1.029 | 1.106 |
| 104564_at   | 0.380 | 0.879 | 0.813 | 0.898 | 0.788 |
| 104565_at   | 0.419 | 1.043 | 1.078 | 0.968 | 1.123 |
| 104566_at   | 0.229 | 1.071 | 1.082 | 1.014 | 1.074 |
| 104567_at   | 0.206 | 0.929 | 0.948 | 0.928 | 0.970 |
| 104568_at   | 0.372 | 0.991 | 0.921 | 0.994 | 0.919 |
| 104569_at   | 0.297 | 1.263 | 1.055 | 1.035 | 1.084 |
| 104571_at   | 0.151 | 0.823 | 0.838 | 0.965 | 0.890 |
| 104572_at   | 0.280 | 1.047 | 0.991 | 0.954 | 1.052 |
| 104573_at   | 0.106 | 1.153 | 1.327 | 0.997 | 1.242 |
| 104574_at   | 0.216 | 0.919 | 0.872 | 0.977 | 0.922 |
| 104576_at   | 0.318 | 1.181 | 1.119 | 1.063 | 1.157 |
| 104577_at   | 0.131 | 0.973 | 1.027 | 0.965 | 1.091 |
| 104578_f_at | 0.209 | 1.447 | 1.360 | 1.133 | 1.221 |
| 104579_r_at | 0.133 | 1.351 | 1.174 | 1.257 | 1.066 |
| 104580_at   | 0.244 | 0.935 | 0.836 | 0.956 | 0.885 |
| 104581_at   | 0.325 | 0.984 | 0.961 | 0.996 | 1.010 |
| 104582_g_at | 0.332 | 0.974 | 1.064 | 0.997 | 1.025 |
| 104583_at   | 0.484 | 1.202 | 1.212 | 1.159 | 1.218 |
| 104584_f_at | 0.201 | 1.034 | 0.952 | 0.962 | 1.025 |
| 104585_at   | 0.478 | 0.922 | 0.914 | 0.945 | 0.921 |
| 104586_at   | 0.434 | 1.303 | 1.293 | 1.127 | 1.235 |
| 104587_at   | 0.323 | 1.230 | 1.130 | 1.219 | 1.225 |

|             |       |       |       |       |       |
|-------------|-------|-------|-------|-------|-------|
| 104588_at   | 0.204 | 0.773 | 0.696 | 0.967 | 0.770 |
| 104589_at   | 0.402 | 1.246 | 1.205 | 1.105 | 1.335 |
| 104590_at   | 0.358 | 0.837 | 0.883 | 0.886 | 0.914 |
| 104591_g_at | 0.272 | 0.920 | 1.007 | 0.964 | 1.013 |
| 104592_i_at | 0.224 | 0.992 | 1.011 | 0.942 | 1.079 |
| 104593_at   | 0.448 | 0.913 | 0.883 | 0.888 | 0.870 |
| 104594_at   | 0.333 | 0.829 | 0.802 | 0.876 | 0.827 |
| 104595_at   | 0.463 | 1.207 | 1.196 | 1.064 | 1.181 |
| 104597_at   | 0.324 | 1.075 | 1.148 | 0.978 | 1.132 |
| 104598_at   | 0.408 | 1.070 | 0.983 | 1.100 | 1.099 |
| 104600_at   | 0.364 | 0.981 | 1.069 | 0.989 | 1.056 |
| 104601_at   | 0.136 | 1.155 | 0.975 | 1.081 | 1.025 |
| 104602_at   | 0.352 | 1.230 | 1.254 | 0.990 | 1.200 |
| 104603_at   | 0.050 | 1.068 | 1.215 | 1.002 | 1.186 |
| 104604_at   | 0.481 | 0.985 | 0.986 | 1.004 | 0.980 |
| 104605_at   | 0.340 | 1.089 | 1.055 | 1.131 | 1.141 |
| 104606_at   | 0.059 | 0.802 | 1.540 | 0.713 | 1.206 |
| 104607_at   | 0.139 | 1.048 | 0.975 | 1.073 | 1.097 |
| 104608_at   | 0.432 | 0.994 | 0.983 | 1.028 | 0.977 |
| 104609_at   | 0.381 | 1.071 | 1.101 | 1.007 | 1.077 |
| 104610_at   | 0.434 | 0.998 | 1.011 | 0.991 | 1.089 |
| 104611_at   | 0.026 | 0.888 | 0.944 | 0.946 | 0.993 |
| 104612_g_at | 0.261 | 1.127 | 1.312 | 1.121 | 1.343 |
| 104614_at   | 0.298 | 0.985 | 0.938 | 0.997 | 0.996 |
| 104615_at   | 0.157 | 0.887 | 0.828 | 0.910 | 0.872 |
| 104616_g_at | 0.277 | 1.019 | 0.978 | 1.039 | 1.037 |
| 104617_at   | 0.434 | 0.908 | 0.849 | 0.945 | 0.858 |
| 104618_at   | 0.314 | 1.165 | 1.088 | 1.100 | 1.096 |
| 104619_at   | 0.115 | 0.957 | 0.898 | 1.005 | 0.877 |
| 104620_at   | 0.183 | 1.119 | 1.045 | 0.957 | 1.106 |
| 104621_at   | 0.165 | 1.265 | 1.221 | 1.014 | 1.168 |
| 104622_at   | 0.481 | 0.883 | 0.850 | 0.888 | 0.860 |
| 104623_at   | 0.246 | 1.011 | 1.048 | 1.058 | 0.958 |
| 104624_at   | 0.344 | 1.015 | 0.999 | 1.027 | 0.982 |
| 104625_at   | 0.198 | 1.081 | 1.037 | 0.953 | 1.066 |
| 104626_at   | 0.343 | 1.064 | 1.018 | 1.009 | 1.036 |
| 104627_at   | 0.116 | 1.059 | 0.945 | 0.969 | 1.042 |
| 104628_at   | 0.189 | 1.167 | 1.285 | 1.033 | 1.237 |
| 104629_at   | 0.309 | 0.885 | 0.885 | 0.876 | 0.914 |
| 104630_at   | 0.504 | 0.936 | 0.924 | 0.927 | 0.919 |
| 104631_g_at | 0.309 | 0.892 | 0.861 | 0.972 | 0.889 |
| 104632_at   | 0.359 | 0.912 | 0.875 | 0.957 | 0.884 |
| 104633_at   | 0.228 | 1.114 | 1.082 | 0.990 | 1.142 |
| 104634_at   | 0.290 | 1.260 | 1.183 | 0.975 | 1.259 |
| 104635_r_at | 0.231 | 0.845 | 0.754 | 0.904 | 0.772 |
| 104636_at   | 0.159 | 0.972 | 0.960 | 1.072 | 1.006 |
| 104637_at   | 0.508 | 0.856 | 0.838 | 0.883 | 0.828 |



|             |       |       |       |       |       |
|-------------|-------|-------|-------|-------|-------|
| 104638_at   | 0.307 | 0.896 | 0.825 | 0.973 | 0.889 |
| 104639_i_at | 0.346 | 1.011 | 0.980 | 0.965 | 1.015 |
| 104640_f_at | 0.323 | 1.015 | 1.113 | 0.973 | 1.131 |
| 104641_f_at | 0.094 | 1.001 | 0.914 | 1.055 | 0.946 |
| 104642_at   | 0.364 | 0.897 | 0.855 | 0.973 | 0.893 |
| 104643_at   | 0.357 | 1.186 | 1.200 | 1.108 | 1.098 |
| 104644_at   | 0.343 | 0.967 | 0.986 | 0.950 | 1.017 |
| 104645_at   | 0.145 | 1.224 | 1.071 | 1.098 | 1.193 |
| 104646_at   | 0.392 | 0.871 | 0.833 | 0.906 | 0.897 |
| 104647_at   | 0.390 | 1.062 | 1.190 | 1.025 | 1.127 |
| 104648_at   | 0.250 | 0.975 | 0.907 | 1.029 | 0.934 |
| 104650_at   | 0.458 | 0.853 | 0.820 | 0.920 | 0.833 |
| 104651_at   | 0.288 | 1.117 | 1.025 | 1.025 | 1.111 |
| 104652_at   | 0.287 | 1.158 | 0.998 | 1.052 | 1.058 |
| 104653_at   | 0.196 | 0.813 | 0.899 | 0.944 | 0.895 |
| 104654_at   | 0.379 | 0.882 | 0.840 | 0.928 | 0.852 |
| 104655_at   | 0.127 | 1.181 | 1.048 | 1.063 | 1.007 |
| 104657_at   | 0.241 | 0.953 | 0.951 | 1.009 | 1.009 |
| 104658_at   | 0.458 | 1.044 | 1.022 | 0.995 | 1.051 |
| 104659_g_at | 0.165 | 0.923 | 1.052 | 0.978 | 1.033 |
| 104660_at   | 0.395 | 0.921 | 0.921 | 0.893 | 0.901 |
| 104661_at   | 0.109 | 1.296 | 1.083 | 1.031 | 1.266 |
| 104662_at   | 0.303 | 0.863 | 0.896 | 0.914 | 0.909 |
| 104663_at   | 0.323 | 0.902 | 0.848 | 0.908 | 0.957 |
| 104664_at   | 0.454 | 0.895 | 0.867 | 0.937 | 0.824 |
| 104665_g_at | 0.458 | 0.877 | 0.878 | 0.944 | 0.852 |
| 104666_at   | 0.273 | 1.028 | 0.974 | 1.055 | 1.027 |
| 104667_at   | 0.110 | 1.252 | 1.024 | 1.099 | 1.131 |
| 104669_at   | 0.433 | 1.052 | 0.927 | 0.944 | 0.960 |
| 104670_at   | 0.375 | 1.215 | 1.216 | 1.074 | 1.158 |
| 104671_at   | 0.467 | 1.121 | 1.107 | 1.107 | 1.115 |
| 104672_at   | 0.449 | 0.908 | 0.845 | 0.928 | 0.848 |
| 104673_at   | 0.249 | 0.952 | 0.918 | 1.000 | 0.949 |
| 104674_s_at | 0.289 | 0.955 | 0.848 | 0.981 | 0.895 |
| 104675_at   | 0.392 | 0.879 | 0.858 | 0.954 | 0.844 |
| 104677_at   | 0.191 | 1.354 | 1.332 | 1.113 | 1.174 |
| 104678_at   | 0.307 | 0.919 | 0.975 | 1.007 | 0.958 |
| 104679_at   | 0.391 | 0.813 | 0.756 | 0.856 | 0.817 |
| 104680_at   | 0.113 | 1.032 | 1.182 | 1.033 | 1.182 |
| 104681_at   | 0.247 | 0.915 | 0.904 | 0.985 | 0.938 |
| 104682_at   | 0.204 | 0.889 | 0.852 | 1.023 | 0.919 |
| 104683_at   | 0.256 | 1.244 | 1.281 | 0.981 | 1.203 |
| 104684_at   | 0.490 | 0.847 | 0.817 | 0.884 | 0.820 |
| 104685_g_at | 0.440 | 0.831 | 0.838 | 0.856 | 0.775 |
| 104686_at   | 0.349 | 0.853 | 0.868 | 0.902 | 0.889 |
| 104687_at   | 0.490 | 0.814 | 0.811 | 0.869 | 0.815 |
| 104688_at   | 0.035 | 0.862 | 1.096 | 0.876 | 0.973 |

|           |       |       |       |       |       |
|-----------|-------|-------|-------|-------|-------|
| 104689_at | 0.200 | 0.992 | 0.886 | 0.931 | 0.896 |
| 104690_at | 0.183 | 0.953 | 0.869 | 0.990 | 0.942 |
| 104692_at | 0.070 | 0.948 | 1.090 | 1.000 | 0.931 |
| 104693_at | 0.370 | 0.968 | 0.989 | 1.020 | 1.006 |
| 104694_at | 0.386 | 1.064 | 1.070 | 0.928 | 1.142 |
| 104695_at | 0.370 | 0.888 | 0.908 | 0.971 | 0.881 |
| 104696_at | 0.039 | 0.896 | 1.197 | 0.929 | 1.052 |
| 104697_at | 0.331 | 0.795 | 0.905 | 0.981 | 0.930 |
| 104698_at | 0.309 | 1.007 | 0.967 | 1.004 | 0.952 |
| 104699_at | 0.149 | 1.080 | 1.008 | 1.026 | 1.062 |
| 104700_at | 0.481 | 0.801 | 0.796 | 0.859 | 0.772 |
| 104701_at | 0.345 | 1.242 | 1.375 | 1.149 | 1.166 |
| 104702_at | 0.452 | 0.983 | 1.008 | 0.999 | 0.986 |
| 104704_at | 0.260 | 1.313 | 1.262 | 1.050 | 1.149 |
| 104706_at | 0.481 | 1.222 | 1.319 | 1.144 | 1.305 |
| 104707_at | 0.223 | 0.949 | 0.894 | 0.933 | 0.952 |
| 104708_at | 0.423 | 1.030 | 0.976 | 0.984 | 0.963 |
| 104709_at | 0.430 | 1.184 | 1.183 | 1.054 | 1.171 |
| 104710_at | 0.246 | 1.071 | 1.108 | 1.066 | 1.000 |
| 104711_at | 0.463 | 1.045 | 1.036 | 0.994 | 1.023 |
| 104712_at | 0.026 | 0.911 | 1.100 | 0.979 | 1.026 |
| 104713_at | 0.459 | 0.990 | 1.019 | 0.964 | 1.013 |
| 104714_at | 0.116 | 1.231 | 1.144 | 0.988 | 1.044 |
| 104715_at | 0.278 | 1.004 | 0.959 | 1.006 | 0.936 |
| 104716_at | 0.182 | 1.112 | 1.133 | 0.950 | 1.197 |
| 104717_at | 0.344 | 1.268 | 1.347 | 0.913 | 1.306 |
| 104719_at | 0.415 | 1.237 | 1.151 | 1.172 | 1.192 |
| 104720_at | 0.379 | 1.162 | 1.133 | 1.056 | 1.140 |
| 104722_at | 0.280 | 0.928 | 0.936 | 0.946 | 0.844 |
| 104723_at | 0.422 | 0.854 | 0.883 | 0.931 | 0.875 |
| 104725_at | 0.375 | 1.291 | 1.516 | 1.115 | 1.431 |
| 104726_at | 0.400 | 0.892 | 0.850 | 0.939 | 0.852 |
| 104727_at | 0.496 | 0.803 | 0.790 | 0.857 | 0.789 |
| 104728_at | 0.310 | 1.231 | 1.274 | 1.074 | 1.255 |
| 104729_at | 0.094 | 1.092 | 0.892 | 0.964 | 1.029 |
| 104730_at | 0.312 | 1.041 | 0.986 | 1.048 | 0.998 |
| 104731_at | 0.189 | 1.125 | 1.008 | 1.064 | 1.028 |
| 104733_at | 0.490 | 1.014 | 1.033 | 1.044 | 1.006 |
| 104735_at | 0.253 | 1.291 | 1.373 | 0.993 | 1.578 |
| 104737_at | 0.316 | 0.987 | 0.992 | 1.061 | 0.986 |
| 104738_at | 0.456 | 1.114 | 1.114 | 1.055 | 1.084 |
| 104739_at | 0.382 | 0.942 | 0.916 | 0.983 | 0.960 |
| 104740_at | 0.241 | 1.057 | 1.057 | 0.948 | 1.133 |
| 104741_at | 0.214 | 0.900 | 0.921 | 0.962 | 0.856 |
| 104742_at | 0.184 | 0.989 | 1.073 | 1.047 | 1.078 |
| 104743_at | 0.142 | 0.854 | 0.802 | 0.963 | 0.879 |
| 104744_at | 0.434 | 1.128 | 1.076 | 1.017 | 1.137 |

|             |       |       |       |       |       |
|-------------|-------|-------|-------|-------|-------|
| 104745_at   | 0.317 | 1.240 | 1.278 | 1.077 | 1.189 |
| 104746_at   | 0.308 | 1.049 | 1.015 | 0.976 | 1.114 |
| 104747_at   | 0.452 | 1.128 | 1.091 | 1.089 | 1.107 |
| 104748_s_at | 0.408 | 0.958 | 0.986 | 1.025 | 0.974 |
| 104749_at   | 0.232 | 1.244 | 1.151 | 1.131 | 1.157 |
| 104750_at   | 0.181 | 1.021 | 1.153 | 0.888 | 1.020 |
| 104751_at   | 0.177 | 0.972 | 0.910 | 1.040 | 0.989 |
| 104752_at   | 0.222 | 0.997 | 0.958 | 1.001 | 1.064 |
| 104754_at   | 0.190 | 1.064 | 0.958 | 1.032 | 0.935 |
| 104755_at   | 0.365 | 0.961 | 0.990 | 1.005 | 0.978 |
| 104756_at   | 0.247 | 0.972 | 1.003 | 0.960 | 1.019 |
| 104757_at   | 0.246 | 0.940 | 0.889 | 0.917 | 0.961 |
| 104758_at   | 0.339 | 1.040 | 1.006 | 1.030 | 1.108 |
| 104759_at   | 0.314 | 1.215 | 1.122 | 1.082 | 1.194 |
| 104760_at   | 0.259 | 1.081 | 1.109 | 1.107 | 1.049 |
| 104761_at   | 0.271 | 1.187 | 1.116 | 1.119 | 1.357 |
| 104762_r_at | 0.381 | 0.877 | 0.859 | 0.946 | 0.878 |
| 104763_at   | 0.128 | 0.852 | 0.914 | 1.030 | 1.006 |
| 104766_at   | 0.139 | 1.003 | 1.038 | 0.941 | 1.049 |
| 104767_f_at | 0.246 | 0.998 | 0.947 | 0.945 | 0.968 |
| 160060_at   | 0.483 | 0.945 | 0.930 | 0.941 | 0.920 |
| 160061_at   | 0.495 | 0.946 | 0.938 | 0.997 | 0.940 |
| 160062_i_at | 0.406 | 0.889 | 0.774 | 0.899 | 0.834 |
| 160063_i_at | 0.277 | 0.891 | 0.822 | 0.948 | 0.860 |
| 160064_at   | 0.206 | 1.124 | 1.121 | 0.995 | 1.212 |
| 160065_s_at | 0.413 | 1.133 | 1.178 | 1.059 | 1.215 |
| 160066_at   | 0.204 | 1.151 | 1.069 | 1.003 | 1.062 |
| 160067_at   | 0.226 | 0.950 | 0.983 | 0.926 | 0.968 |
| 160068_at   | 0.459 | 1.052 | 1.091 | 1.025 | 1.115 |
| 160069_at   | 0.342 | 1.065 | 1.077 | 0.996 | 1.114 |
| 160070_at   | 0.461 | 0.913 | 0.903 | 0.943 | 0.842 |
| 160071_at   | 0.233 | 0.993 | 1.013 | 0.912 | 1.028 |
| 160072_at   | 0.109 | 0.919 | 0.969 | 0.933 | 0.984 |
| 160073_i_at | 0.127 | 0.862 | 0.782 | 0.976 | 0.895 |
| 160074_at   | 0.035 | 1.039 | 1.011 | 0.959 | 1.084 |
| 160075_at   | 0.250 | 1.075 | 0.986 | 0.985 | 1.081 |
| 160076_at   | 0.301 | 1.041 | 1.158 | 1.136 | 1.100 |
| 160077_at   | 0.461 | 0.903 | 0.868 | 0.927 | 0.841 |
| 160078_at   | 0.072 | 1.104 | 1.246 | 1.105 | 1.085 |
| 160079_i_at | 0.342 | 1.145 | 1.131 | 0.999 | 1.109 |
| 160080_r_at | 0.497 | 0.801 | 0.728 | 0.810 | 0.707 |
| 160081_at   | 0.320 | 1.000 | 1.047 | 0.976 | 1.057 |
| 160082_s_at | 0.281 | 1.073 | 1.292 | 1.120 | 1.137 |
| 160083_at   | 0.229 | 1.031 | 0.982 | 1.451 | 1.151 |
| 160084_at   | 0.253 | 1.143 | 1.191 | 1.049 | 1.028 |
| 160085_at   | 0.031 | 1.098 | 1.273 | 1.153 | 0.994 |
| 160086_at   | 0.351 | 0.851 | 0.810 | 0.916 | 0.866 |

|             |       |       |       |       |       |
|-------------|-------|-------|-------|-------|-------|
| 160087_at   | 0.480 | 0.862 | 0.838 | 0.900 | 0.866 |
| 160088_at   | 0.179 | 1.082 | 0.924 | 1.022 | 0.908 |
| 160089_at   | 0.147 | 1.142 | 1.114 | 1.013 | 1.107 |
| 160090_f_at | 0.200 | 1.231 | 1.200 | 1.332 | 1.109 |
| 160091_at   | 0.285 | 0.956 | 1.057 | 1.075 | 1.034 |
| 160092_at   | 0.288 | 1.259 | 1.085 | 1.061 | 1.120 |
| 160093_r_at | 0.224 | 0.864 | 0.806 | 0.952 | 0.843 |
| 160094_at   | 0.171 | 1.221 | 1.318 | 1.148 | 1.203 |
| 160095_at   | 0.345 | 0.992 | 1.080 | 1.180 | 1.067 |
| 160096_at   | 0.310 | 1.133 | 1.083 | 1.049 | 1.065 |
| 160097_at   | 0.500 | 0.885 | 0.874 | 0.894 | 0.854 |
| 160098_s_at | 0.331 | 0.874 | 0.968 | 0.968 | 0.991 |
| 160099_at   | 0.303 | 0.936 | 0.871 | 0.965 | 0.852 |
| 160100_at   | 0.444 | 1.026 | 1.034 | 1.013 | 1.013 |
| 160101_at   | 0.163 | 0.931 | 0.987 | 0.930 | 0.981 |
| 160102_at   | 0.343 | 1.185 | 1.344 | 1.116 | 1.252 |
| 160103_at   | 0.120 | 1.268 | 1.207 | 0.908 | 1.289 |
| 160104_at   | 0.057 | 1.006 | 0.974 | 1.072 | 0.972 |
| 160105_r_at | 0.463 | 0.793 | 0.760 | 0.791 | 0.715 |
| 160106_at   | 0.073 | 0.999 | 1.416 | 1.000 | 1.330 |
| 160107_at   | 0.159 | 1.222 | 1.337 | 1.069 | 1.320 |
| 160108_at   | 0.146 | 1.013 | 1.122 | 0.934 | 0.991 |
| 160109_at   | 0.325 | 1.032 | 0.975 | 0.939 | 0.973 |
| 160110_at   | 0.375 | 0.924 | 0.941 | 0.983 | 0.954 |
| 160111_at   | 0.402 | 1.122 | 1.156 | 1.093 | 1.248 |
| 160112_at   | 0.436 | 1.016 | 0.997 | 0.912 | 1.053 |
| 160113_at   | 0.497 | 0.977 | 0.982 | 0.984 | 0.978 |
| 160114_at   | 0.328 | 1.233 | 1.351 | 1.136 | 1.247 |
| 160115_at   | 0.084 | 1.051 | 1.135 | 1.072 | 0.919 |
| 160116_at   | 0.204 | 0.942 | 0.863 | 1.012 | 0.911 |
| 160117_at   | 0.291 | 1.140 | 1.018 | 1.080 | 0.969 |
| 160118_at   | 0.430 | 1.056 | 1.103 | 1.079 | 1.094 |
| 160119_at   | 0.251 | 1.057 | 1.244 | 0.945 | 0.917 |
| 160120_i_at | 0.323 | 0.864 | 0.850 | 0.919 | 0.924 |
| 160121_at   | 0.129 | 0.963 | 1.077 | 0.947 | 1.034 |
| 160122_at   | 0.300 | 0.964 | 0.996 | 0.976 | 1.013 |
| 160123_at   | 0.362 | 1.103 | 1.135 | 1.067 | 1.188 |
| 160124_r_at | 0.363 | 1.407 | 1.508 | 1.126 | 1.486 |
| 160125_at   | 0.070 | 0.946 | 0.989 | 0.905 | 0.940 |
| 160126_at   | 0.293 | 0.996 | 1.050 | 0.941 | 1.034 |
| 160127_at   | 0.438 | 1.073 | 1.178 | 1.126 | 1.254 |
| 160128_at   | 0.418 | 1.091 | 1.055 | 1.109 | 1.063 |
| 160129_at   | 0.051 | 1.207 | 1.248 | 1.061 | 1.325 |
| 160130_at   | 0.499 | 1.110 | 1.141 | 1.059 | 1.160 |
| 160131_at   | 0.379 | 1.302 | 1.264 | 1.192 | 1.254 |
| 160132_at   | 0.275 | 0.894 | 0.864 | 0.922 | 0.946 |
| 160133_at   | 0.414 | 0.897 | 0.843 | 0.917 | 0.851 |

|             |       |       |       |       |       |
|-------------|-------|-------|-------|-------|-------|
| 160134_at   | 0.349 | 0.936 | 0.905 | 0.951 | 0.956 |
| 160135_at   | 0.231 | 0.908 | 0.910 | 0.933 | 0.941 |
| 160136_r_at | 0.369 | 1.069 | 1.051 | 1.078 | 1.042 |
| 160137_at   | 0.160 | 1.110 | 1.162 | 1.045 | 1.178 |
| 160138_at   | 0.151 | 1.300 | 1.116 | 1.166 | 1.246 |
| 160139_at   | 0.151 | 0.909 | 0.847 | 1.084 | 0.825 |
| 160140_at   | 0.392 | 1.189 | 1.218 | 1.093 | 1.205 |
| 160141_r_at | 0.388 | 1.007 | 1.067 | 0.970 | 1.050 |
| 160142_at   | 0.488 | 0.983 | 0.944 | 0.990 | 0.971 |
| 160143_r_at | 0.252 | 0.940 | 0.937 | 0.985 | 0.929 |
| 160144_at   | 0.480 | 1.191 | 1.202 | 1.110 | 1.263 |
| 160145_at   | 0.465 | 0.946 | 0.935 | 1.023 | 0.920 |
| 160146_r_at | 0.429 | 1.081 | 1.037 | 1.067 | 1.019 |
| 160147_r_at | 0.490 | 0.785 | 0.761 | 0.834 | 0.718 |
| 160148_at   | 0.484 | 0.842 | 0.813 | 0.888 | 0.825 |
| 160149_at   | 0.458 | 1.174 | 1.190 | 1.214 | 1.234 |
| 160150_f_at | 0.189 | 1.202 | 1.153 | 0.922 | 1.223 |
| 160151_i_at | 0.357 | 1.117 | 1.025 | 1.014 | 1.150 |
| 160152_at   | 0.102 | 1.215 | 1.232 | 1.043 | 1.262 |
| 160153_at   | 0.245 | 1.214 | 1.329 | 0.997 | 1.215 |
| 160154_at   | 0.355 | 0.878 | 0.829 | 0.920 | 0.885 |
| 160155_at   | 0.461 | 0.860 | 0.890 | 0.942 | 0.889 |
| 160156_at   | 0.125 | 1.285 | 1.547 | 1.115 | 1.619 |
| 160157_at   | 0.502 | 0.870 | 0.853 | 0.888 | 0.862 |
| 160158_at   | 0.175 | 1.153 | 1.063 | 1.002 | 1.236 |
| 160159_at   | 0.142 | 1.023 | 1.142 | 1.039 | 1.176 |
| 160160_at   | 0.216 | 0.936 | 0.910 | 0.968 | 0.987 |
| 160161_at   | 0.275 | 0.983 | 0.983 | 0.969 | 0.989 |
| 160162_at   | 0.358 | 0.926 | 0.993 | 1.009 | 0.960 |
| 160163_at   | 0.310 | 0.909 | 0.876 | 0.914 | 0.836 |
| 160164_at   | 0.508 | 1.023 | 1.027 | 0.996 | 1.035 |
| 160165_at   | 0.255 | 0.996 | 1.032 | 1.047 | 0.947 |
| 160166_r_at | 0.428 | 0.913 | 1.009 | 0.921 | 0.938 |
| 160167_at   | 0.374 | 1.044 | 1.078 | 1.008 | 1.099 |
| 160168_at   | 0.136 | 1.051 | 1.011 | 0.971 | 1.054 |
| 160169_at   | 0.126 | 1.188 | 1.274 | 1.058 | 1.300 |
| 160170_at   | 0.139 | 0.798 | 0.783 | 0.879 | 0.886 |
| 160171_f_at | 0.220 | 1.096 | 1.084 | 1.023 | 1.146 |
| 160172_at   | 0.266 | 0.848 | 0.928 | 0.951 | 0.870 |
| 160173_at   | 0.309 | 0.909 | 0.914 | 1.032 | 0.942 |
| 160174_at   | 0.132 | 1.049 | 0.997 | 0.927 | 0.988 |
| 160175_at   | 0.484 | 0.913 | 0.889 | 0.940 | 0.927 |
| 160176_at   | 0.409 | 0.983 | 0.984 | 1.030 | 1.008 |
| 160177_at   | 0.101 | 1.050 | 1.149 | 0.933 | 1.176 |
| 160178_r_at | 0.233 | 0.887 | 0.937 | 0.977 | 0.990 |
| 160179_at   | 0.288 | 1.005 | 0.965 | 0.912 | 1.067 |
| 160180_at   | 0.232 | 0.973 | 0.941 | 0.948 | 1.043 |

|             |       |       |       |       |       |
|-------------|-------|-------|-------|-------|-------|
| 160181_at   | 0.444 | 0.881 | 0.817 | 0.867 | 0.793 |
| 160182_at   | 0.287 | 1.165 | 1.142 | 1.024 | 1.051 |
| 160183_f_at | 0.181 | 1.191 | 1.169 | 0.958 | 1.184 |
| 160184_at   | 0.256 | 1.037 | 1.084 | 1.113 | 1.007 |
| 160185_at   | 0.204 | 0.847 | 0.813 | 0.937 | 0.837 |
| 160186_at   | 0.349 | 0.944 | 0.926 | 0.994 | 0.958 |
| 160187_at   | 0.222 | 1.082 | 1.041 | 1.005 | 1.125 |
| 160188_at   | 0.349 | 1.118 | 1.013 | 1.060 | 1.049 |
| 160189_at   | 0.377 | 0.928 | 0.943 | 1.090 | 0.992 |
| 160190_at   | 0.196 | 1.018 | 1.011 | 1.023 | 0.965 |
| 160191_at   | 0.165 | 0.934 | 0.966 | 0.978 | 1.016 |
| 160192_at   | 0.035 | 1.047 | 1.233 | 0.979 | 1.279 |
| 160193_at   | 0.422 | 1.032 | 1.076 | 1.052 | 1.019 |
| 160194_at   | 0.402 | 0.930 | 0.884 | 0.915 | 0.901 |
| 160195_at   | 0.321 | 1.089 | 1.090 | 1.032 | 1.050 |
| 160196_at   | 0.369 | 1.336 | 1.211 | 1.205 | 1.214 |
| 160197_at   | 0.328 | 0.918 | 0.899 | 0.944 | 0.946 |
| 160198_at   | 0.238 | 1.072 | 1.008 | 0.918 | 1.074 |
| 160199_at   | 0.490 | 1.204 | 1.171 | 1.064 | 1.250 |
| 160200_at   | 0.459 | 1.328 | 1.412 | 1.229 | 1.441 |
| 160201_r_at | 0.467 | 0.978 | 0.954 | 0.929 | 0.975 |
| 160202_at   | 0.263 | 1.364 | 1.502 | 1.194 | 1.448 |
| 160203_at   | 0.102 | 0.955 | 1.125 | 0.954 | 1.071 |
| 160204_at   | 0.366 | 0.996 | 1.029 | 1.054 | 1.069 |
| 160205_f_at | 0.269 | 1.175 | 1.116 | 0.994 | 1.211 |
| 160206_at   | 0.203 | 0.833 | 0.859 | 0.930 | 0.877 |
| 160207_at   | 0.303 | 1.160 | 1.115 | 1.251 | 1.098 |
| 160208_at   | 0.507 | 1.032 | 1.051 | 1.025 | 1.038 |
| 160209_at   | 0.274 | 1.270 | 1.180 | 1.081 | 1.266 |
| 160210_at   | 0.507 | 0.876 | 0.849 | 0.917 | 0.857 |
| 160211_at   | 0.422 | 1.013 | 1.030 | 1.044 | 1.034 |
| 160212_at   | 0.445 | 0.918 | 0.866 | 0.906 | 0.906 |
| 160213_at   | 0.488 | 0.884 | 0.861 | 0.908 | 0.856 |
| 160214_at   | 0.125 | 0.926 | 0.965 | 1.042 | 0.978 |
| 160215_at   | 0.199 | 1.038 | 1.008 | 1.148 | 0.937 |
| 160216_f_at | 0.312 | 0.873 | 0.912 | 0.936 | 0.899 |
| 160217_at   | 0.436 | 1.091 | 1.053 | 1.016 | 1.057 |
| 160218_at   | 0.171 | 1.109 | 0.972 | 1.063 | 1.070 |
| 160219_r_at | 0.432 | 1.011 | 0.961 | 1.009 | 1.016 |
| 160220_at   | 0.154 | 1.069 | 1.024 | 0.952 | 1.091 |
| 160221_at   | 0.444 | 0.865 | 0.862 | 0.848 | 0.841 |
| 160222_i_at | 0.348 | 1.018 | 1.020 | 1.032 | 0.989 |
| 160223_at   | 0.330 | 1.009 | 1.023 | 0.952 | 0.959 |
| 160224_at   | 0.358 | 0.963 | 0.973 | 1.057 | 0.997 |
| 160225_at   | 0.137 | 1.023 | 1.045 | 0.967 | 1.076 |
| 160226_at   | 0.362 | 1.003 | 0.978 | 1.018 | 1.046 |
| 160227_s_at | 0.382 | 1.181 | 1.194 | 1.044 | 1.251 |

|             |       |       |       |       |       |
|-------------|-------|-------|-------|-------|-------|
| 160228_at   | 0.148 | 0.916 | 0.932 | 0.991 | 0.845 |
| 160229_at   | 0.348 | 0.894 | 0.984 | 0.980 | 0.942 |
| 160230_at   | 0.220 | 1.253 | 1.226 | 1.052 | 1.203 |
| 160231_at   | 0.224 | 0.985 | 1.055 | 0.970 | 0.974 |
| 160232_at   | 0.417 | 0.972 | 0.983 | 1.021 | 0.988 |
| 160233_at   | 0.091 | 1.055 | 1.028 | 1.157 | 1.089 |
| 160234_at   | 0.235 | 1.273 | 1.387 | 1.104 | 1.432 |
| 160235_at   | 0.500 | 1.038 | 1.038 | 1.040 | 1.062 |
| 160236_at   | 0.102 | 0.985 | 1.010 | 0.958 | 1.145 |
| 160237_at   | 0.391 | 0.972 | 1.065 | 0.981 | 1.118 |
| 160238_at   | 0.277 | 0.901 | 0.880 | 0.994 | 0.898 |
| 160239_at   | 0.504 | 1.121 | 1.157 | 1.059 | 1.166 |
| 160240_at   | 0.219 | 1.133 | 1.204 | 1.022 | 1.157 |
| 160241_at   | 0.432 | 0.904 | 0.841 | 0.941 | 0.875 |
| 160242_at   | 0.135 | 1.068 | 1.025 | 0.973 | 1.182 |
| 160243_r_at | 0.320 | 0.987 | 0.905 | 1.523 | 0.944 |
| 160244_at   | 0.434 | 0.988 | 0.994 | 1.020 | 0.976 |
| 160245_at   | 0.169 | 1.187 | 1.096 | 1.038 | 1.119 |
| 160246_at   | 0.226 | 1.339 | 1.597 | 1.176 | 1.399 |
| 160247_at   | 0.253 | 1.026 | 0.989 | 0.936 | 1.095 |
| 160248_at   | 0.126 | 0.966 | 1.065 | 0.948 | 1.030 |
| 160249_at   | 0.099 | 1.363 | 1.575 | 1.184 | 1.414 |
| 160250_at   | 0.470 | 0.889 | 0.861 | 0.930 | 0.891 |
| 160251_at   | 0.465 | 1.179 | 1.139 | 1.100 | 1.157 |
| 160252_at   | 0.282 | 1.386 | 1.467 | 1.133 | 1.379 |
| 160253_at   | 0.436 | 1.048 | 1.055 | 1.039 | 1.036 |
| 160254_at   | 0.280 | 1.110 | 1.164 | 1.042 | 1.008 |
| 160255_at   | 0.062 | 1.305 | 1.090 | 1.018 | 1.104 |
| 160256_at   | 0.319 | 1.280 | 1.297 | 1.075 | 1.295 |
| 160257_at   | 0.250 | 1.164 | 1.129 | 1.102 | 1.144 |
| 160258_at   | 0.219 | 0.920 | 0.945 | 0.971 | 1.008 |
| 160259_at   | 0.483 | 0.923 | 0.922 | 0.992 | 0.921 |
| 160260_at   | 0.408 | 0.973 | 0.887 | 0.954 | 0.913 |
| 160261_i_at | 0.393 | 1.325 | 1.330 | 1.192 | 1.336 |
| 160262_at   | 0.477 | 1.168 | 1.267 | 1.256 | 1.242 |
| 160263_r_at | 0.301 | 1.063 | 0.974 | 1.008 | 1.092 |
| 160264_s_at | 0.209 | 1.124 | 1.021 | 1.118 | 0.928 |
| 160265_at   | 0.226 | 1.095 | 1.058 | 1.045 | 1.027 |
| 160266_r_at | 0.124 | 1.009 | 1.149 | 0.990 | 1.055 |
| 160267_at   | 0.364 | 1.162 | 1.107 | 1.118 | 1.121 |
| 160268_at   | 0.362 | 0.963 | 0.931 | 0.930 | 0.936 |
| 160269_at   | 0.210 | 0.990 | 0.945 | 1.040 | 1.012 |
| 160270_at   | 0.125 | 1.115 | 1.328 | 1.065 | 1.161 |
| 160271_at   | 0.189 | 1.159 | 1.117 | 1.055 | 1.208 |
| 160272_at   | 0.179 | 1.048 | 1.148 | 0.975 | 1.053 |
| 160273_at   | 0.220 | 1.309 | 1.166 | 1.128 | 1.243 |
| 160274_at   | 0.440 | 0.964 | 0.960 | 0.962 | 0.991 |

|             |       |       |       |       |       |
|-------------|-------|-------|-------|-------|-------|
| 160275_at   | 0.216 | 0.908 | 0.999 | 0.998 | 1.055 |
| 160276_at   | 0.323 | 0.927 | 0.810 | 0.937 | 0.882 |
| 160277_at   | 0.246 | 1.069 | 1.093 | 1.018 | 1.171 |
| 160278_at   | 0.359 | 1.009 | 1.083 | 0.985 | 1.035 |
| 160279_at   | 0.407 | 1.143 | 1.213 | 1.074 | 1.181 |
| 160280_at   | 0.309 | 1.096 | 1.037 | 1.025 | 1.054 |
| 160281_at   | 0.257 | 1.224 | 1.185 | 1.003 | 1.226 |
| 160282_at   | 0.419 | 0.984 | 0.940 | 0.989 | 0.973 |
| 160283_at   | 0.205 | 1.037 | 1.025 | 0.948 | 1.013 |
| 160284_at   | 0.323 | 0.927 | 0.871 | 0.962 | 0.931 |
| 160285_at   | 0.213 | 1.186 | 1.214 | 1.054 | 1.255 |
| 160286_at   | 0.294 | 1.165 | 1.263 | 1.143 | 1.340 |
| 160287_at   | 0.184 | 0.903 | 1.032 | 0.997 | 1.156 |
| 160288_at   | 0.497 | 1.047 | 1.045 | 1.011 | 1.060 |
| 160289_s_at | 0.402 | 1.031 | 1.063 | 1.186 | 1.084 |
| 160290_at   | 0.449 | 1.089 | 1.109 | 1.083 | 1.068 |
| 160291_at   | 0.076 | 1.250 | 1.492 | 0.990 | 1.318 |
| 160292_at   | 0.219 | 0.999 | 0.940 | 1.010 | 0.908 |
| 160293_at   | 0.188 | 1.029 | 1.072 | 0.972 | 1.108 |
| 160294_at   | 0.168 | 0.996 | 0.929 | 1.043 | 0.934 |
| 160295_at   | 0.509 | 1.118 | 1.129 | 1.121 | 1.144 |
| 160296_at   | 0.376 | 1.176 | 1.293 | 1.082 | 1.302 |
| 160297_at   | 0.410 | 1.014 | 1.050 | 1.008 | 1.048 |
| 160298_at   | 0.163 | 1.142 | 1.426 | 1.207 | 1.238 |
| 160299_at   | 0.246 | 1.119 | 1.158 | 1.079 | 1.015 |
| 160300_at   | 0.109 | 0.899 | 1.049 | 0.929 | 0.895 |
| 160301_at   | 0.330 | 1.073 | 1.071 | 0.967 | 1.095 |
| 160302_at   | 0.220 | 0.912 | 0.872 | 0.979 | 0.924 |
| 160303_at   | 0.357 | 1.039 | 0.956 | 0.997 | 0.972 |
| 160304_r_at | 0.188 | 0.896 | 0.839 | 0.980 | 0.930 |
| 160305_at   | 0.484 | 1.065 | 1.045 | 0.959 | 1.059 |
| 160306_at   | 0.270 | 0.681 | 0.501 | 1.648 | 0.526 |
| 160307_at   | 0.300 | 1.032 | 0.987 | 1.014 | 0.985 |
| 160308_at   | 0.101 | 1.228 | 1.201 | 1.018 | 1.167 |
| 160309_at   | 0.185 | 1.279 | 1.261 | 1.012 | 1.263 |
| 160310_at   | 0.390 | 0.984 | 0.983 | 0.944 | 0.952 |
| 160311_at   | 0.188 | 1.225 | 1.217 | 1.072 | 1.092 |
| 160312_at   | 0.389 | 1.108 | 1.170 | 1.027 | 1.131 |
| 160313_at   | 0.254 | 1.291 | 1.154 | 1.076 | 1.192 |
| 160314_at   | 0.271 | 0.819 | 0.891 | 1.138 | 0.800 |
| 160315_at   | 0.499 | 0.840 | 0.796 | 0.839 | 0.793 |
| 160316_at   | 0.323 | 1.147 | 1.007 | 0.983 | 1.058 |
| 160317_at   | 0.486 | 1.072 | 1.075 | 1.088 | 1.077 |
| 160318_at   | 0.196 | 1.152 | 1.154 | 0.993 | 1.053 |
| 160319_at   | 0.273 | 1.211 | 1.225 | 1.172 | 1.145 |
| 160320_at   | 0.321 | 1.004 | 0.942 | 1.107 | 0.957 |
| 160321_at   | 0.243 | 1.144 | 1.097 | 0.959 | 1.062 |



|             |       |       |       |       |       |
|-------------|-------|-------|-------|-------|-------|
| 160322_at   | 0.452 | 1.260 | 1.274 | 1.150 | 1.229 |
| 160323_at   | 0.490 | 1.094 | 1.143 | 1.072 | 1.162 |
| 160324_at   | 0.286 | 0.965 | 0.986 | 0.930 | 1.036 |
| 160325_r_at | 0.468 | 1.026 | 0.967 | 1.035 | 1.013 |
| 160326_at   | 0.257 | 1.186 | 1.244 | 1.050 | 1.128 |
| 160327_at   | 0.117 | 0.990 | 0.975 | 0.913 | 1.034 |
| 160328_at   | 0.188 | 1.113 | 1.027 | 1.016 | 1.015 |
| 160329_at   | 0.502 | 1.057 | 1.063 | 1.033 | 1.078 |
| 160330_at   | 0.468 | 1.088 | 1.021 | 1.011 | 1.073 |
| 160331_at   | 0.274 | 0.848 | 0.806 | 0.940 | 0.843 |
| 160332_at   | 0.480 | 0.819 | 0.792 | 0.878 | 0.783 |
| 160333_at   | 0.071 | 0.984 | 1.140 | 1.097 | 0.998 |
| 160334_at   | 0.413 | 0.833 | 0.809 | 0.893 | 0.849 |
| 160335_at   | 0.251 | 1.038 | 0.975 | 1.054 | 0.966 |
| 160336_at   | 0.420 | 0.889 | 0.852 | 0.942 | 0.902 |
| 160337_at   | 0.133 | 1.114 | 1.208 | 1.162 | 1.070 |
| 160338_at   | 0.390 | 1.059 | 1.096 | 1.061 | 1.153 |
| 160339_at   | 0.311 | 0.998 | 1.053 | 1.019 | 1.043 |
| 160340_at   | 0.384 | 0.905 | 0.954 | 0.944 | 0.930 |
| 160341_at   | 0.308 | 1.017 | 1.042 | 0.982 | 1.043 |
| 160342_r_at | 0.492 | 0.823 | 0.784 | 0.871 | 0.740 |
| 160343_at   | 0.103 | 1.090 | 1.152 | 1.002 | 1.145 |
| 160344_at   | 0.085 | 1.222 | 1.325 | 1.051 | 1.356 |
| 160345_at   | 0.198 | 0.989 | 1.014 | 1.100 | 1.084 |
| 160346_at   | 0.198 | 1.095 | 0.944 | 1.045 | 0.985 |
| 160347_at   | 0.194 | 1.012 | 1.088 | 0.958 | 1.092 |
| 160348_at   | 0.117 | 1.060 | 1.029 | 0.981 | 0.972 |
| 160349_at   | 0.021 | 1.086 | 1.110 | 0.946 | 1.094 |
| 160350_at   | 0.223 | 1.388 | 1.173 | 1.489 | 1.315 |
| 160351_at   | 0.306 | 0.927 | 0.970 | 0.979 | 0.905 |
| 160352_at   | 0.072 | 0.896 | 0.843 | 1.001 | 0.881 |
| 160353_i_at | 0.134 | 0.907 | 1.132 | 1.209 | 1.156 |
| 160354_at   | 0.373 | 0.890 | 0.848 | 1.009 | 0.855 |
| 160355_at   | 0.294 | 0.956 | 0.877 | 1.029 | 0.899 |
| 160356_at   | 0.094 | 1.050 | 1.249 | 1.028 | 1.112 |
| 160357_at   | 0.346 | 0.910 | 0.877 | 0.993 | 0.869 |
| 160358_at   | 0.477 | 1.092 | 1.110 | 1.026 | 1.154 |
| 160359_at   | 0.291 | 1.082 | 1.029 | 1.120 | 1.267 |
| 160360_at   | 0.470 | 1.112 | 1.130 | 1.042 | 1.120 |
| 160361_at   | 0.254 | 1.173 | 1.247 | 1.024 | 1.219 |
| 160362_at   | 0.260 | 1.154 | 1.062 | 1.207 | 1.029 |
| 160363_at   | 0.096 | 0.961 | 0.990 | 1.080 | 0.938 |
| 160364_at   | 0.312 | 1.162 | 1.206 | 1.018 | 1.244 |
| 160365_at   | 0.502 | 1.054 | 1.053 | 1.032 | 1.035 |
| 160366_at   | 0.467 | 1.082 | 1.185 | 1.037 | 1.148 |
| 160367_at   | 0.109 | 1.025 | 0.955 | 1.062 | 0.933 |
| 160368_at   | 0.235 | 0.949 | 0.854 | 0.938 | 0.851 |

|             |       |       |       |       |       |
|-------------|-------|-------|-------|-------|-------|
| 160369_at   | 0.416 | 1.048 | 1.008 | 1.043 | 1.031 |
| 160370_at   | 0.427 | 0.904 | 0.895 | 1.011 | 0.877 |
| 160371_at   | 0.145 | 1.247 | 1.360 | 1.099 | 1.304 |
| 160372_at   | 0.454 | 0.951 | 0.936 | 0.997 | 0.923 |
| 160373_i_at | 0.305 | 1.270 | 1.153 | 1.064 | 1.174 |
| 160374_r_at | 0.339 | 0.988 | 0.948 | 0.974 | 0.972 |
| 160375_at   | 0.257 | 0.440 | 0.342 | 1.226 | 0.315 |
| 160376_at   | 0.438 | 1.152 | 1.113 | 1.082 | 1.090 |
| 160377_at   | 0.413 | 1.244 | 1.251 | 1.072 | 1.294 |
| 160378_at   | 0.050 | 1.070 | 1.090 | 1.196 | 0.893 |
| 160379_at   | 0.354 | 1.230 | 1.386 | 1.257 | 1.252 |
| 160380_at   | 0.474 | 1.162 | 1.234 | 1.073 | 1.198 |
| 160381_at   | 0.331 | 0.947 | 0.957 | 1.009 | 0.968 |
| 160382_at   | 0.053 | 1.112 | 1.079 | 0.982 | 1.013 |
| 160383_at   | 0.093 | 1.180 | 1.226 | 1.011 | 1.321 |
| 160384_at   | 0.307 | 1.051 | 1.026 | 0.922 | 0.994 |
| 160385_at   | 0.244 | 0.968 | 0.918 | 1.098 | 0.984 |
| 160386_at   | 0.248 | 1.127 | 1.230 | 1.042 | 1.167 |
| 160387_at   | 0.278 | 0.996 | 1.052 | 0.987 | 1.147 |
| 160388_at   | 0.267 | 1.134 | 1.242 | 1.005 | 1.084 |
| 160389_r_at | 0.484 | 0.786 | 0.751 | 0.798 | 0.705 |
| 160390_at   | 0.432 | 0.915 | 0.928 | 1.005 | 0.938 |
| 160391_at   | 0.117 | 1.140 | 1.227 | 1.051 | 1.138 |
| 160392_at   | 0.315 | 0.875 | 0.876 | 0.945 | 0.837 |
| 160393_at   | 0.395 | 1.339 | 1.345 | 1.156 | 1.342 |
| 160394_at   | 0.456 | 1.187 | 1.199 | 1.190 | 1.279 |
| 160395_at   | 0.049 | 1.287 | 1.388 | 1.037 | 1.453 |
| 160396_at   | 0.160 | 1.101 | 1.070 | 1.011 | 1.067 |
| 160397_at   | 0.264 | 1.246 | 1.253 | 1.038 | 1.202 |
| 160398_at   | 0.107 | 0.973 | 1.044 | 0.967 | 1.120 |
| 160399_r_at | 0.483 | 1.298 | 1.359 | 1.153 | 1.329 |
| 160400_at   | 0.310 | 1.136 | 1.080 | 1.163 | 1.065 |
| 160401_r_at | 0.339 | 0.948 | 0.953 | 0.963 | 0.933 |
| 160402_at   | 0.096 | 1.033 | 1.084 | 0.939 | 1.152 |
| 160403_at   | 0.089 | 1.140 | 1.180 | 0.980 | 1.129 |
| 160404_at   | 0.212 | 0.916 | 0.830 | 0.969 | 0.876 |
| 160405_at   | 0.419 | 0.922 | 0.869 | 0.986 | 0.874 |
| 160406_at   | 0.104 | 1.171 | 1.416 | 1.266 | 1.716 |
| 160407_at   | 0.410 | 0.961 | 0.886 | 0.982 | 0.965 |
| 160408_at   | 0.323 | 0.932 | 0.927 | 1.027 | 0.909 |
| 160409_at   | 0.390 | 1.073 | 1.054 | 1.013 | 1.017 |
| 160410_at   | 0.463 | 1.000 | 0.978 | 0.965 | 0.991 |
| 160411_at   | 0.321 | 1.036 | 0.990 | 1.006 | 1.038 |
| 160412_at   | 0.251 | 1.032 | 1.023 | 0.956 | 1.002 |
| 160413_at   | 0.404 | 0.889 | 0.861 | 0.929 | 0.904 |
| 160414_at   | 0.272 | 1.058 | 1.169 | 1.060 | 1.081 |
| 160415_at   | 0.386 | 1.027 | 1.039 | 1.000 | 1.036 |

|             |       |       |       |       |       |
|-------------|-------|-------|-------|-------|-------|
| 160416_at   | 0.254 | 1.152 | 1.056 | 1.023 | 1.069 |
| 160417_at   | 0.095 | 0.936 | 1.019 | 1.018 | 1.060 |
| 160418_at   | 0.337 | 0.968 | 0.918 | 1.002 | 0.961 |
| 160419_r_at | 0.419 | 1.005 | 1.026 | 0.982 | 1.038 |
| 160420_r_at | 0.390 | 0.888 | 0.821 | 0.990 | 0.804 |
| 160421_r_at | 0.238 | 0.866 | 0.829 | 0.972 | 0.815 |
| 160422_at   | 0.379 | 1.018 | 1.003 | 1.008 | 0.971 |
| 160423_at   | 0.328 | 0.953 | 0.964 | 1.027 | 0.907 |
| 160424_f_at | 0.187 | 0.985 | 1.190 | 1.032 | 0.972 |
| 160425_at   | 0.175 | 1.098 | 1.118 | 0.969 | 1.142 |
| 160426_at   | 0.113 | 1.014 | 1.026 | 0.984 | 1.083 |
| 160427_at   | 0.308 | 1.149 | 1.117 | 1.032 | 1.157 |
| 160428_at   | 0.359 | 1.095 | 1.098 | 1.153 | 1.102 |
| 160429_at   | 0.054 | 0.966 | 0.988 | 0.935 | 1.041 |
| 160430_at   | 0.165 | 1.137 | 1.163 | 1.017 | 1.324 |
| 160431_at   | 0.273 | 1.101 | 1.185 | 1.100 | 1.105 |
| 160432_at   | 0.472 | 1.031 | 1.044 | 1.000 | 1.032 |
| 160433_at   | 0.245 | 0.975 | 0.943 | 0.957 | 0.998 |
| 160434_at   | 0.470 | 1.092 | 1.170 | 1.070 | 1.191 |
| 160435_at   | 0.240 | 1.033 | 0.962 | 1.038 | 1.040 |
| 160436_at   | 0.318 | 0.892 | 0.963 | 0.950 | 0.908 |
| 160437_at   | 0.463 | 0.986 | 0.950 | 0.996 | 0.951 |
| 160438_at   | 0.456 | 0.851 | 0.841 | 0.897 | 0.870 |
| 160439_at   | 0.323 | 1.044 | 1.027 | 1.011 | 1.058 |
| 160440_at   | 0.375 | 1.314 | 1.264 | 1.222 | 1.223 |
| 160441_at   | 0.315 | 0.916 | 0.847 | 0.985 | 0.906 |
| 160442_at   | 0.481 | 0.930 | 0.939 | 0.929 | 0.955 |
| 160443_at   | 0.470 | 0.976 | 0.935 | 0.952 | 0.939 |
| 160444_at   | 0.329 | 1.032 | 1.069 | 1.045 | 1.106 |
| 160445_at   | 0.132 | 0.905 | 0.873 | 1.010 | 0.861 |
| 160446_at   | 0.107 | 1.107 | 1.907 | 0.989 | 0.876 |
| 160447_at   | 0.240 | 1.299 | 1.329 | 1.061 | 1.255 |
| 160448_at   | 0.185 | 0.920 | 0.901 | 0.968 | 0.966 |
| 160449_at   | 0.406 | 1.153 | 1.166 | 1.037 | 1.199 |
| 160450_at   | 0.488 | 1.061 | 1.065 | 1.042 | 1.091 |
| 160451_at   | 0.349 | 1.010 | 1.110 | 1.045 | 1.072 |
| 160452_at   | 0.345 | 0.918 | 0.944 | 0.971 | 0.935 |
| 160453_at   | 0.188 | 1.009 | 0.912 | 1.006 | 0.954 |
| 160454_at   | 0.323 | 0.802 | 0.897 | 0.860 | 0.855 |
| 160455_s_at | 0.360 | 0.992 | 0.995 | 1.011 | 1.024 |
| 160456_at   | 0.114 | 0.988 | 1.009 | 0.976 | 1.060 |
| 160457_at   | 0.265 | 1.148 | 1.148 | 1.013 | 1.120 |
| 160458_at   | 0.398 | 1.236 | 1.143 | 1.085 | 1.154 |
| 160459_r_at | 0.494 | 0.781 | 0.741 | 0.804 | 0.683 |
| 160460_at   | 0.390 | 0.880 | 0.874 | 0.956 | 0.830 |
| 160461_f_at | 0.125 | 1.095 | 1.241 | 1.056 | 1.086 |
| 160462_f_at | 0.108 | 1.091 | 1.106 | 1.115 | 0.996 |

|             |       |       |       |       |       |
|-------------|-------|-------|-------|-------|-------|
| 160463_at   | 0.303 | 0.985 | 0.950 | 1.019 | 0.959 |
| 160464_s_at | 0.204 | 1.040 | 0.918 | 1.032 | 0.925 |
| 160465_at   | 0.484 | 0.820 | 0.768 | 0.865 | 0.801 |
| 160466_at   | 0.305 | 1.000 | 0.944 | 0.965 | 0.972 |
| 160467_at   | 0.385 | 0.812 | 0.780 | 0.903 | 0.806 |
| 160468_at   | 0.271 | 1.355 | 1.368 | 1.123 | 1.427 |
| 160469_at   | 0.369 | 1.052 | 1.656 | 0.937 | 1.276 |
| 160470_at   | 0.103 | 0.911 | 0.932 | 0.961 | 0.993 |
| 160471_at   | 0.349 | 1.139 | 1.150 | 1.051 | 1.275 |
| 160472_r_at | 0.310 | 1.090 | 1.007 | 1.025 | 1.064 |
| 160473_at   | 0.227 | 0.856 | 0.865 | 0.978 | 0.866 |
| 160474_at   | 0.459 | 1.058 | 1.029 | 1.021 | 1.055 |
| 160475_at   | 0.376 | 1.149 | 1.091 | 1.040 | 1.071 |
| 160476_f_at | 0.025 | 1.077 | 1.128 | 0.930 | 1.135 |
| 160477_at   | 0.386 | 0.958 | 0.912 | 0.998 | 0.922 |
| 160478_r_at | 0.353 | 0.821 | 0.742 | 0.936 | 0.819 |
| 160479_at   | 0.053 | 1.148 | 0.847 | 1.095 | 1.113 |
| 160480_at   | 0.422 | 1.115 | 1.059 | 1.061 | 1.071 |
| 160481_at   | 0.349 | 0.971 | 0.899 | 1.475 | 0.929 |
| 160482_at   | 0.069 | 1.302 | 1.211 | 1.066 | 1.341 |
| 160483_at   | 0.330 | 1.361 | 1.327 | 1.118 | 1.324 |
| 160484_at   | 0.494 | 1.182 | 1.187 | 1.106 | 1.236 |
| 160485_r_at | 0.232 | 1.034 | 0.976 | 0.904 | 1.054 |
| 160486_at   | 0.189 | 0.847 | 0.826 | 0.825 | 0.866 |
| 160487_at   | 0.390 | 0.652 | 0.485 | 0.758 | 0.579 |
| 160488_at   | 0.142 | 0.871 | 0.820 | 0.927 | 0.861 |
| 160489_at   | 0.411 | 0.922 | 0.877 | 0.946 | 0.920 |
| 160490_at   | 0.136 | 0.944 | 0.892 | 0.979 | 0.994 |
| 160491_at   | 0.444 | 0.890 | 0.928 | 0.942 | 0.886 |
| 160492_at   | 0.268 | 0.947 | 0.963 | 0.992 | 0.999 |
| 160493_at   | 0.151 | 1.229 | 1.509 | 1.100 | 1.344 |
| 160494_at   | 0.440 | 0.883 | 0.842 | 0.895 | 0.812 |
| 160495_at   | 0.139 | 1.266 | 1.444 | 0.951 | 1.107 |
| 160496_s_at | 0.158 | 1.074 | 1.276 | 1.015 | 1.246 |
| 160497_at   | 0.371 | 1.035 | 1.117 | 1.041 | 1.118 |
| 160498_at   | 0.171 | 1.026 | 0.947 | 0.959 | 0.948 |
| 160499_at   | 0.107 | 1.222 | 1.318 | 0.979 | 1.034 |
| 160500_at   | 0.405 | 0.890 | 0.836 | 0.945 | 0.898 |
| 160501_at   | 0.056 | 0.889 | 0.953 | 0.950 | 1.073 |
| 160502_at   | 0.194 | 0.926 | 0.935 | 0.942 | 1.073 |
| 160503_at   | 0.147 | 1.055 | 1.154 | 0.974 | 1.094 |
| 160504_at   | 0.276 | 0.957 | 0.995 | 1.007 | 0.947 |
| 160505_at   | 0.467 | 0.877 | 0.881 | 0.908 | 0.902 |
| 160506_at   | 0.360 | 1.029 | 0.981 | 1.033 | 0.998 |
| 160507_at   | 0.440 | 1.111 | 1.095 | 1.008 | 1.173 |
| 160508_at   | 0.355 | 0.892 | 0.885 | 0.979 | 0.849 |
| 160509_at   | 0.001 | 1.261 | 7.633 | 0.984 | 1.939 |

|             |       |       |       |       |       |
|-------------|-------|-------|-------|-------|-------|
| 160510_f_at | 0.302 | 0.916 | 0.841 | 1.293 | 0.884 |
| 160511_at   | 0.163 | 1.283 | 1.815 | 1.186 | 1.411 |
| 160512_at   | 0.203 | 0.949 | 0.911 | 0.952 | 1.015 |
| 160513_at   | 0.111 | 1.009 | 1.069 | 0.979 | 1.072 |
| 160514_at   | 0.337 | 1.084 | 1.023 | 1.062 | 0.985 |
| 160515_at   | 0.093 | 1.023 | 0.945 | 0.937 | 1.026 |
| 160516_at   | 0.167 | 1.049 | 0.979 | 1.108 | 0.988 |
| 160517_at   | 0.478 | 0.939 | 0.952 | 0.992 | 0.946 |
| 160518_at   | 0.231 | 1.149 | 1.114 | 1.033 | 1.067 |
| 160519_at   | 0.226 | 1.178 | 1.025 | 1.007 | 1.012 |
| 160520_at   | 0.099 | 1.250 | 1.106 | 1.030 | 1.138 |
| 160521_at   | 0.337 | 1.072 | 1.136 | 1.070 | 1.047 |
| 160522_at   | 0.254 | 1.100 | 1.011 | 0.987 | 1.238 |
| 160523_at   | 0.500 | 0.819 | 0.819 | 0.859 | 0.800 |
| 160524_at   | 0.322 | 0.835 | 0.807 | 0.919 | 0.865 |
| 160525_f_at | 0.301 | 1.022 | 0.963 | 1.015 | 0.953 |
| 160526_s_at | 0.235 | 1.067 | 1.048 | 1.007 | 1.174 |
| 160527_at   | 0.354 | 1.018 | 0.987 | 1.034 | 1.018 |
| 160528_at   | 0.232 | 0.913 | 0.854 | 0.959 | 0.888 |
| 160529_r_at | 0.298 | 1.211 | 1.360 | 1.068 | 1.312 |
| 160530_at   | 0.492 | 1.157 | 1.185 | 1.052 | 1.183 |
| 160531_at   | 0.270 | 1.043 | 1.081 | 0.905 | 1.028 |
| 160532_at   | 0.098 | 1.106 | 1.182 | 1.046 | 1.036 |
| 160533_r_at | 0.507 | 0.766 | 0.743 | 0.800 | 0.706 |
| 160534_at   | 0.417 | 1.004 | 0.989 | 1.030 | 1.002 |
| 160535_at   | 0.470 | 1.135 | 1.116 | 1.090 | 1.116 |
| 160536_at   | 0.126 | 1.079 | 0.977 | 0.991 | 1.045 |
| 160537_at   | 0.117 | 0.827 | 0.590 | 1.029 | 0.659 |
| 160538_at   | 0.094 | 0.961 | 1.106 | 0.959 | 1.027 |
| 160539_at   | 0.408 | 1.009 | 1.210 | 1.094 | 1.224 |
| 160540_at   | 0.107 | 1.091 | 1.268 | 0.994 | 1.074 |
| 160541_at   | 0.306 | 0.856 | 0.831 | 0.923 | 0.888 |
| 160542_at   | 0.495 | 0.955 | 0.933 | 0.974 | 0.951 |
| 160543_at   | 0.136 | 1.143 | 1.180 | 1.086 | 1.018 |
| 160544_at   | 0.121 | 0.978 | 1.066 | 1.051 | 1.115 |
| 160545_at   | 0.483 | 1.015 | 1.011 | 1.002 | 1.012 |
| 160546_at   | 0.276 | 0.966 | 0.939 | 1.116 | 0.967 |
| 160547_s_at | 0.231 | 1.023 | 0.980 | 0.941 | 1.133 |
| 160548_at   | 0.337 | 0.853 | 0.864 | 0.921 | 0.936 |
| 160549_at   | 0.364 | 1.078 | 1.072 | 1.014 | 1.052 |
| 160550_i_at | 0.382 | 0.953 | 1.013 | 0.926 | 1.017 |
| 160551_at   | 0.488 | 1.139 | 1.221 | 1.105 | 1.185 |
| 160552_at   | 0.233 | 1.009 | 1.027 | 0.996 | 1.081 |
| 160553_at   | 0.355 | 0.859 | 0.842 | 0.943 | 0.782 |
| 160554_at   | 0.226 | 1.255 | 1.311 | 1.168 | 1.510 |
| 160555_r_at | 0.120 | 0.962 | 0.960 | 0.991 | 1.017 |
| 160556_at   | 0.390 | 1.076 | 1.166 | 1.020 | 1.158 |

|             |       |       |       |       |       |
|-------------|-------|-------|-------|-------|-------|
| 160557_at   | 0.422 | 0.996 | 0.987 | 0.986 | 0.958 |
| 160558_at   | 0.150 | 1.054 | 1.078 | 1.046 | 0.986 |
| 160559_at   | 0.391 | 0.862 | 0.806 | 0.892 | 0.838 |
| 160560_at   | 0.441 | 0.972 | 0.948 | 0.982 | 0.939 |
| 160561_at   | 0.354 | 1.048 | 1.063 | 1.047 | 1.078 |
| 160562_at   | 0.170 | 1.210 | 1.188 | 1.019 | 1.161 |
| 160563_at   | 0.452 | 1.142 | 1.086 | 1.095 | 1.118 |
| 160564_at   | 0.300 | 1.341 | 1.781 | 1.264 | 1.489 |
| 160565_at   | 0.125 | 1.166 | 1.465 | 1.062 | 1.091 |
| 160566_at   | 0.324 | 0.988 | 0.909 | 0.986 | 0.987 |
| 160567_at   | 0.348 | 0.854 | 0.827 | 0.906 | 0.853 |
| 160568_at   | 0.221 | 0.926 | 0.988 | 1.172 | 0.898 |
| 160569_at   | 0.096 | 0.976 | 1.232 | 0.903 | 1.070 |
| 160570_at   | 0.143 | 0.919 | 0.824 | 0.934 | 0.892 |
| 160571_at   | 0.490 | 1.162 | 1.239 | 1.144 | 1.201 |
| 160572_at   | 0.397 | 0.916 | 0.907 | 0.885 | 0.863 |
| 160573_at   | 0.413 | 1.070 | 1.114 | 1.112 | 1.078 |
| 160574_at   | 0.091 | 0.958 | 0.897 | 1.014 | 0.968 |
| 160575_at   | 0.340 | 1.260 | 1.218 | 1.082 | 1.213 |
| 160576_at   | 0.467 | 0.893 | 0.856 | 0.878 | 0.848 |
| 160577_at   | 0.156 | 1.104 | 1.029 | 1.047 | 1.036 |
| 160578_at   | 0.072 | 1.204 | 1.112 | 0.937 | 1.170 |
| 160579_at   | 0.158 | 1.060 | 1.244 | 0.977 | 1.068 |
| 160580_at   | 0.075 | 1.024 | 1.317 | 1.078 | 1.202 |
| 160581_at   | 0.440 | 1.029 | 1.001 | 1.035 | 0.993 |
| 160582_at   | 0.430 | 0.894 | 0.849 | 0.941 | 0.891 |
| 160583_at   | 0.133 | 0.910 | 1.368 | 1.146 | 0.942 |
| 160584_at   | 0.401 | 0.884 | 0.875 | 0.892 | 0.880 |
| 160585_at   | 0.486 | 1.077 | 1.054 | 1.077 | 1.064 |
| 160586_r_at | 0.406 | 0.991 | 0.976 | 0.987 | 0.956 |
| 160587_at   | 0.089 | 0.992 | 1.027 | 0.943 | 0.936 |
| 160588_at   | 0.424 | 1.110 | 1.053 | 1.041 | 1.117 |
| 160589_at   | 0.399 | 1.005 | 1.031 | 1.020 | 1.044 |
| 160590_r_at | 0.463 | 0.867 | 0.850 | 0.904 | 0.870 |
| 160591_at   | 0.461 | 0.970 | 0.919 | 0.992 | 0.929 |
| 160592_at   | 0.160 | 1.055 | 0.958 | 0.978 | 0.978 |
| 160593_at   | 0.497 | 1.052 | 1.099 | 1.043 | 1.100 |
| 160594_at   | 0.140 | 0.925 | 0.888 | 1.026 | 0.877 |
| 160595_at   | 0.354 | 0.978 | 0.946 | 0.978 | 0.987 |
| 160596_at   | 0.240 | 0.985 | 1.038 | 0.922 | 1.058 |
| 160597_at   | 0.369 | 1.227 | 1.205 | 1.088 | 1.265 |
| 160598_at   | 0.278 | 0.935 | 0.877 | 0.965 | 0.921 |
| 160599_r_at | 0.276 | 0.874 | 0.845 | 0.970 | 0.906 |
| 160600_at   | 0.480 | 1.198 | 1.163 | 1.136 | 1.152 |
| 160601_at   | 0.181 | 0.988 | 0.895 | 1.068 | 0.944 |
| 160602_at   | 0.481 | 0.940 | 0.975 | 0.938 | 0.960 |
| 160603_at   | 0.391 | 1.000 | 0.942 | 0.961 | 1.038 |

|             |       |       |       |       |       |
|-------------|-------|-------|-------|-------|-------|
| 160604_at   | 0.297 | 1.035 | 0.979 | 1.038 | 1.001 |
| 160605_s_at | 0.494 | 0.994 | 0.973 | 0.994 | 0.996 |
| 160606_r_at | 0.443 | 0.987 | 1.024 | 0.978 | 1.020 |
| 160607_at   | 0.246 | 1.107 | 0.969 | 1.048 | 1.074 |
| 160608_at   | 0.298 | 0.914 | 0.955 | 0.977 | 0.941 |
| 160609_at   | 0.481 | 0.966 | 1.039 | 0.954 | 1.070 |
| 160610_at   | 0.313 | 1.537 | 1.265 | 1.191 | 1.394 |
| 160611_at   | 0.155 | 1.188 | 1.071 | 1.045 | 1.167 |
| 160612_at   | 0.196 | 1.114 | 1.017 | 0.992 | 1.131 |
| 160613_at   | 0.176 | 0.908 | 0.816 | 0.942 | 0.810 |
| 160614_at   | 0.353 | 0.943 | 0.969 | 0.931 | 1.127 |
| 160615_at   | 0.281 | 1.150 | 1.051 | 1.062 | 0.983 |
| 160616_at   | 0.297 | 0.984 | 0.995 | 0.952 | 0.994 |
| 160617_at   | 0.344 | 1.036 | 0.957 | 1.119 | 1.080 |
| 160618_at   | 0.379 | 0.806 | 0.880 | 0.869 | 0.889 |
| 160619_at   | 0.174 | 1.001 | 0.951 | 0.972 | 0.995 |
| 160620_at   | 0.297 | 1.276 | 1.169 | 1.116 | 1.204 |
| 160621_at   | 0.270 | 1.024 | 1.109 | 1.036 | 1.157 |
| 160622_at   | 0.258 | 0.953 | 0.917 | 0.960 | 1.005 |
| 160623_at   | 0.182 | 1.159 | 1.077 | 1.030 | 1.114 |
| 160624_at   | 0.376 | 1.126 | 1.096 | 1.142 | 1.080 |
| 160625_f_at | 0.402 | 0.937 | 0.899 | 0.925 | 0.928 |
| 160626_at   | 0.247 | 1.132 | 1.100 | 1.012 | 1.172 |
| 160627_at   | 0.495 | 1.004 | 0.983 | 1.003 | 0.985 |
| 160628_at   | 0.404 | 0.976 | 0.965 | 0.972 | 0.904 |
| 160629_at   | 0.186 | 1.048 | 1.190 | 1.059 | 1.141 |
| 160630_at   | 0.408 | 1.086 | 1.034 | 1.043 | 1.063 |
| 160631_s_at | 0.375 | 0.946 | 0.971 | 1.066 | 0.960 |
| 160632_at   | 0.284 | 1.246 | 1.084 | 1.178 | 1.076 |
| 160633_at   | 0.095 | 1.062 | 1.229 | 0.954 | 1.131 |
| 160634_at   | 0.128 | 1.072 | 0.992 | 1.095 | 1.028 |
| 160635_at   | 0.468 | 0.956 | 0.952 | 0.980 | 0.962 |
| 160636_at   | 0.094 | 0.888 | 0.937 | 0.910 | 0.960 |
| 160637_at   | 0.331 | 1.075 | 1.057 | 0.973 | 1.188 |
| 160638_at   | 0.190 | 0.993 | 1.040 | 1.070 | 1.132 |
| 160639_at   | 0.390 | 1.049 | 1.026 | 1.057 | 0.999 |
| 160640_at   | 0.271 | 0.998 | 0.977 | 1.015 | 0.964 |
| 160641_at   | 0.260 | 0.904 | 0.859 | 0.943 | 0.924 |
| 160642_at   | 0.267 | 1.030 | 0.950 | 1.008 | 0.995 |
| 160643_at   | 0.354 | 1.245 | 1.243 | 1.053 | 1.186 |
| 160644_at   | 0.448 | 0.884 | 0.877 | 0.955 | 0.876 |
| 160645_at   | 0.171 | 0.988 | 1.072 | 0.961 | 0.993 |
| 160646_at   | 0.074 | 1.116 | 1.447 | 1.049 | 1.053 |
| 160647_at   | 0.403 | 0.894 | 0.856 | 0.935 | 0.868 |
| 160648_at   | 0.334 | 0.996 | 1.076 | 0.996 | 1.081 |
| 160649_at   | 0.470 | 0.972 | 0.963 | 0.974 | 0.930 |
| 160650_at   | 0.397 | 0.879 | 0.904 | 0.948 | 0.903 |

|             |       |       |       |       |       |
|-------------|-------|-------|-------|-------|-------|
| 160651_at   | 0.308 | 1.252 | 1.061 | 1.122 | 1.229 |
| 160652_at   | 0.490 | 0.977 | 1.001 | 0.980 | 1.009 |
| 160653_at   | 0.343 | 0.981 | 0.991 | 1.037 | 1.016 |
| 160654_at   | 0.360 | 0.964 | 0.956 | 0.960 | 0.986 |
| 160655_at   | 0.330 | 1.019 | 1.064 | 0.915 | 1.309 |
| 160656_i_at | 0.403 | 0.753 | 0.755 | 0.798 | 0.786 |
| 160657_at   | 0.232 | 1.240 | 1.187 | 1.027 | 1.262 |
| 160658_at   | 0.094 | 0.963 | 0.891 | 0.999 | 0.972 |
| 160659_at   | 0.323 | 0.934 | 0.964 | 0.980 | 0.991 |
| 160660_r_at | 0.175 | 1.104 | 1.010 | 1.007 | 1.011 |
| 160661_at   | 0.095 | 0.952 | 0.866 | 1.036 | 0.908 |
| 160662_r_at | 0.349 | 1.017 | 1.006 | 1.005 | 0.990 |
| 160663_at   | 0.276 | 0.944 | 0.977 | 0.972 | 0.977 |
| 160664_at   | 0.196 | 0.910 | 0.966 | 0.988 | 1.021 |
| 160665_at   | 0.340 | 0.877 | 0.881 | 0.964 | 0.862 |
| 160666_at   | 0.227 | 1.117 | 1.085 | 1.010 | 1.163 |
| 160667_at   | 0.203 | 1.068 | 1.186 | 0.978 | 1.200 |
| 160668_at   | 0.420 | 1.020 | 1.025 | 0.993 | 1.026 |
| 160669_at   | 0.389 | 1.132 | 1.169 | 1.095 | 1.182 |
| 160670_at   | 0.142 | 1.053 | 0.921 | 0.977 | 0.952 |
| 160671_at   | 0.456 | 0.949 | 0.947 | 0.961 | 0.965 |
| 160672_at   | 0.465 | 0.979 | 0.966 | 0.967 | 0.991 |
| 160673_at   | 0.140 | 0.953 | 0.982 | 0.927 | 0.932 |
| 160674_at   | 0.306 | 0.900 | 0.835 | 0.989 | 0.861 |
| 160675_at   | 0.357 | 0.876 | 0.859 | 0.949 | 0.878 |
| 160676_at   | 0.390 | 1.221 | 1.219 | 0.992 | 1.256 |
| 160677_at   | 0.353 | 0.878 | 0.877 | 0.930 | 0.902 |
| 160678_at   | 0.461 | 1.196 | 1.215 | 1.150 | 1.314 |
| 160679_at   | 0.380 | 1.221 | 1.113 | 1.071 | 1.111 |
| 160680_at   | 0.467 | 1.017 | 0.979 | 1.024 | 0.987 |
| 160681_at   | 0.154 | 0.816 | 0.899 | 0.897 | 0.949 |
| 160682_at   | 0.141 | 1.135 | 1.107 | 0.989 | 1.120 |
| 160683_at   | 0.175 | 1.333 | 1.198 | 1.069 | 1.246 |
| 160684_at   | 0.393 | 0.994 | 0.999 | 0.969 | 0.999 |
| 160685_at   | 0.367 | 1.098 | 1.042 | 1.112 | 1.132 |
| 160686_at   | 0.438 | 1.086 | 1.089 | 1.031 | 1.030 |
| 160687_r_at | 0.328 | 1.057 | 1.036 | 1.018 | 1.006 |
| 160688_at   | 0.282 | 1.283 | 1.342 | 1.046 | 1.241 |
| 160689_r_at | 0.274 | 0.934 | 0.901 | 0.979 | 0.896 |
| 160690_at   | 0.069 | 1.139 | 1.049 | 0.990 | 1.028 |
| 160691_at   | 0.395 | 0.867 | 0.797 | 0.834 | 0.814 |
| 160692_at   | 0.372 | 0.865 | 0.879 | 0.879 | 0.867 |
| 160693_at   | 0.440 | 1.168 | 1.177 | 1.154 | 1.150 |
| 160694_at   | 0.187 | 1.082 | 1.269 | 1.139 | 1.161 |
| 160695_i_at | 0.401 | 0.878 | 0.849 | 0.965 | 0.809 |
| 160696_at   | 0.291 | 0.960 | 0.892 | 0.949 | 0.944 |
| 160697_at   | 0.178 | 1.003 | 0.878 | 1.013 | 0.954 |



|             |       |       |       |       |       |
|-------------|-------|-------|-------|-------|-------|
| 160698_s_at | 0.357 | 1.082 | 1.175 | 1.060 | 1.100 |
| 160699_at   | 0.169 | 0.917 | 0.980 | 0.943 | 0.933 |
| 160700_i_at | 0.346 | 0.835 | 0.826 | 0.867 | 0.722 |
| 160701_at   | 0.280 | 0.960 | 0.928 | 1.025 | 0.968 |
| 160702_at   | 0.302 | 1.151 | 1.142 | 1.110 | 1.015 |
| 160703_at   | 0.411 | 1.074 | 1.081 | 1.083 | 1.060 |
| 160704_at   | 0.380 | 1.120 | 1.108 | 1.023 | 1.200 |
| 160705_at   | 0.461 | 0.925 | 0.905 | 0.980 | 0.903 |
| 160706_at   | 0.366 | 1.239 | 1.114 | 1.152 | 1.377 |
| 160707_at   | 0.505 | 1.017 | 1.019 | 1.008 | 1.016 |
| 160708_at   | 0.187 | 1.092 | 1.023 | 0.951 | 1.168 |
| 160709_at   | 0.248 | 0.924 | 1.003 | 0.964 | 1.018 |
| 160710_at   | 0.369 | 1.221 | 1.183 | 1.010 | 1.222 |
| 160711_at   | 0.488 | 1.132 | 1.193 | 1.265 | 1.206 |
| 160712_r_at | 0.392 | 0.930 | 0.886 | 0.983 | 0.897 |
| 160713_at   | 0.128 | 1.091 | 0.971 | 1.022 | 1.005 |
| 160714_at   | 0.129 | 1.312 | 1.207 | 1.016 | 1.181 |
| 160715_at   | 0.440 | 1.191 | 1.196 | 1.086 | 1.359 |
| 160716_at   | 0.329 | 0.911 | 0.855 | 0.933 | 0.844 |
| 160717_at   | 0.241 | 1.096 | 1.105 | 1.003 | 1.190 |
| 160718_at   | 0.368 | 1.228 | 1.261 | 1.087 | 1.274 |
| 160719_at   | 0.334 | 0.899 | 0.921 | 0.961 | 0.961 |
| 160720_at   | 0.283 | 0.885 | 0.830 | 0.911 | 0.846 |
| 160721_at   | 0.254 | 1.090 | 1.086 | 0.990 | 1.064 |
| 160722_at   | 0.401 | 0.989 | 1.024 | 1.019 | 0.993 |
| 160723_at   | 0.250 | 0.936 | 0.922 | 0.934 | 1.003 |
| 160724_at   | 0.309 | 1.100 | 1.086 | 1.040 | 1.148 |
| 160725_at   | 0.505 | 1.053 | 1.070 | 1.068 | 1.069 |
| 160726_at   | 0.246 | 1.314 | 1.354 | 0.956 | 1.340 |
| 160727_at   | 0.170 | 0.954 | 0.930 | 0.997 | 0.914 |
| 160728_r_at | 0.386 | 1.069 | 1.046 | 1.087 | 1.077 |
| 160729_f_at | 0.408 | 0.808 | 0.757 | 0.904 | 0.807 |
| 160730_at   | 0.226 | 0.901 | 0.845 | 0.940 | 0.918 |
| 160731_at   | 0.205 | 0.933 | 0.874 | 0.983 | 0.885 |
| 160732_at   | 0.330 | 1.113 | 1.054 | 1.045 | 1.062 |
| 160733_at   | 0.445 | 0.897 | 0.878 | 0.929 | 0.904 |
| 160734_at   | 0.456 | 1.130 | 1.242 | 1.138 | 1.265 |
| 160735_at   | 0.163 | 1.029 | 0.936 | 0.992 | 0.998 |
| 160736_at   | 0.162 | 1.032 | 0.991 | 0.959 | 1.087 |
| 160737_at   | 0.342 | 0.947 | 0.919 | 0.987 | 0.924 |
| 160738_at   | 0.371 | 0.941 | 0.898 | 0.952 | 0.963 |
| 160739_at   | 0.230 | 1.058 | 0.944 | 0.723 | 1.380 |
| 160740_at   | 0.465 | 1.002 | 0.955 | 0.990 | 0.988 |
| 160741_at   | 0.461 | 0.983 | 0.992 | 1.007 | 1.002 |
| 160742_at   | 0.398 | 1.089 | 1.084 | 1.035 | 1.092 |
| 160743_at   | 0.167 | 0.983 | 0.973 | 1.012 | 1.045 |
| 160744_r_at | 0.477 | 0.816 | 0.777 | 0.903 | 0.769 |

|             |       |       |       |       |       |
|-------------|-------|-------|-------|-------|-------|
| 160745_at   | 0.390 | 0.964 | 0.917 | 1.016 | 0.900 |
| 160746_at   | 0.249 | 1.331 | 1.413 | 0.972 | 1.284 |
| 160747_at   | 0.405 | 0.911 | 0.892 | 0.932 | 0.866 |
| 160748_at   | 0.308 | 0.924 | 0.881 | 0.958 | 0.907 |
| 160749_at   | 0.355 | 1.225 | 1.173 | 1.200 | 1.174 |
| 160750_at   | 0.502 | 1.004 | 0.983 | 0.988 | 0.998 |
| 160751_i_at | 0.222 | 1.039 | 1.056 | 0.948 | 1.057 |
| 160752_at   | 0.307 | 1.023 | 0.977 | 1.010 | 1.035 |
| 160753_at   | 0.467 | 0.946 | 0.915 | 0.953 | 0.885 |
| 160754_at   | 0.379 | 1.033 | 0.946 | 1.256 | 0.973 |
| 160755_at   | 0.182 | 0.952 | 1.032 | 0.953 | 1.085 |
| 160756_at   | 0.016 | 1.002 | 1.040 | 0.899 | 1.019 |
| 160757_at   | 0.431 | 1.063 | 1.034 | 1.050 | 1.080 |
| 160758_at   | 0.366 | 1.287 | 1.262 | 1.050 | 1.287 |
| 160759_at   | 0.033 | 1.106 | 1.148 | 0.998 | 1.122 |
| 160760_at   | 0.486 | 1.081 | 1.074 | 1.045 | 1.104 |
| 160761_at   | 0.246 | 0.844 | 0.751 | 1.012 | 0.775 |
| 160762_at   | 0.325 | 1.012 | 0.985 | 0.984 | 1.039 |
| 160763_at   | 0.246 | 0.878 | 0.872 | 0.849 | 0.930 |
| 160764_at   | 0.250 | 1.298 | 1.314 | 1.098 | 1.269 |
| 160765_at   | 0.120 | 1.077 | 0.972 | 1.067 | 0.978 |
| 160766_at   | 0.269 | 1.014 | 0.970 | 0.996 | 1.066 |
| 160767_at   | 0.214 | 1.023 | 0.983 | 1.067 | 1.126 |
| 160768_at   | 0.480 | 1.103 | 1.088 | 1.071 | 1.064 |
| 160769_at   | 0.456 | 0.938 | 0.965 | 0.936 | 0.972 |
| 160770_at   | 0.348 | 0.982 | 1.048 | 1.005 | 0.996 |
| 160771_r_at | 0.470 | 0.841 | 0.797 | 0.892 | 0.838 |
| 160772_i_at | 0.287 | 1.285 | 1.263 | 1.233 | 1.094 |
| 160773_at   | 0.352 | 1.079 | 1.049 | 0.974 | 1.009 |
| 160774_at   | 0.145 | 0.964 | 1.045 | 1.035 | 1.126 |
| 160775_at   | 0.298 | 1.276 | 1.184 | 1.059 | 1.174 |
| 160776_at   | 0.380 | 1.165 | 1.085 | 1.054 | 1.080 |
| 160777_at   | 0.383 | 1.154 | 1.121 | 1.161 | 1.163 |
| 160778_at   | 0.341 | 0.839 | 0.869 | 0.981 | 0.836 |
| 160779_at   | 0.169 | 1.053 | 0.998 | 0.967 | 1.032 |
| 160780_at   | 0.137 | 1.024 | 0.926 | 0.971 | 1.013 |
| 160781_r_at | 0.140 | 1.029 | 1.099 | 0.975 | 1.105 |
| 160782_at   | 0.468 | 1.019 | 1.022 | 0.989 | 1.028 |
| 160783_at   | 0.189 | 1.028 | 0.955 | 1.023 | 1.095 |
| 160784_r_at | 0.039 | 0.943 | 0.982 | 0.920 | 0.961 |
| 160785_at   | 0.241 | 1.378 | 1.188 | 1.122 | 1.279 |
| 160786_f_at | 0.432 | 0.920 | 0.882 | 0.943 | 0.914 |
| 160787_at   | 0.436 | 0.955 | 0.941 | 1.002 | 0.946 |
| 160788_at   | 0.050 | 1.172 | 1.300 | 1.064 | 1.266 |
| 160789_at   | 0.027 | 0.989 | 1.207 | 1.032 | 1.062 |
| 160790_s_at | 0.381 | 1.111 | 1.207 | 1.148 | 1.109 |
| 160791_at   | 0.277 | 1.327 | 1.264 | 1.137 | 1.308 |

|             |       |       |       |       |       |
|-------------|-------|-------|-------|-------|-------|
| 160792_at   | 0.301 | 1.118 | 1.125 | 1.105 | 1.238 |
| 160793_at   | 0.422 | 1.054 | 1.015 | 0.995 | 1.064 |
| 160794_at   | 0.312 | 1.021 | 0.945 | 1.024 | 0.945 |
| 160795_at   | 0.353 | 1.331 | 1.368 | 1.153 | 1.356 |
| 160796_at   | 0.497 | 0.898 | 0.873 | 0.934 | 0.891 |
| 160797_r_at | 0.338 | 0.908 | 0.840 | 0.907 | 0.900 |
| 160798_at   | 0.439 | 0.912 | 0.902 | 0.964 | 0.892 |
| 160799_at   | 0.443 | 0.854 | 0.876 | 0.896 | 0.814 |
| 160800_at   | 0.366 | 0.998 | 0.950 | 1.013 | 0.990 |
| 160801_at   | 0.187 | 1.043 | 0.981 | 0.942 | 1.070 |
| 160802_at   | 0.327 | 0.985 | 1.062 | 1.019 | 1.003 |
| 160803_at   | 0.478 | 1.113 | 1.149 | 1.091 | 1.137 |
| 160804_at   | 0.492 | 1.066 | 1.081 | 1.039 | 1.058 |
| 160805_s_at | 0.375 | 1.082 | 1.164 | 1.035 | 1.125 |
| 160806_at   | 0.163 | 0.934 | 0.900 | 0.975 | 0.919 |
| 160807_at   | 0.377 | 0.947 | 0.950 | 1.016 | 0.980 |
| 160808_at   | 0.414 | 1.117 | 1.129 | 1.114 | 1.099 |
| 160809_at   | 0.200 | 1.057 | 1.009 | 0.895 | 1.039 |
| 160810_r_at | 0.397 | 0.849 | 0.761 | 0.904 | 0.823 |
| 160811_at   | 0.087 | 1.099 | 1.245 | 1.072 | 1.289 |
| 160812_at   | 0.323 | 1.050 | 1.087 | 1.042 | 1.026 |
| 160813_r_at | 0.505 | 0.755 | 0.702 | 0.788 | 0.720 |
| 160814_at   | 0.179 | 0.948 | 0.991 | 1.008 | 0.972 |
| 160815_at   | 0.051 | 0.979 | 1.247 | 0.867 | 1.092 |
| 160816_at   | 0.326 | 0.946 | 0.889 | 0.983 | 0.904 |
| 160817_at   | 0.465 | 0.928 | 0.874 | 0.956 | 0.844 |
| 160818_at   | 0.291 | 1.085 | 1.016 | 1.048 | 1.033 |
| 160819_at   | 0.205 | 0.792 | 0.749 | 0.902 | 0.760 |
| 160820_at   | 0.246 | 1.052 | 1.120 | 1.090 | 1.011 |
| 160821_r_at | 0.481 | 1.069 | 1.075 | 1.054 | 1.061 |
| 160822_at   | 0.241 | 1.000 | 0.923 | 1.036 | 0.966 |
| 160823_at   | 0.239 | 1.151 | 1.073 | 1.003 | 1.179 |
| 160824_at   | 0.406 | 1.149 | 1.123 | 1.014 | 1.068 |
| 160825_at   | 0.271 | 0.963 | 0.984 | 0.916 | 1.024 |
| 160826_at   | 0.175 | 1.043 | 1.047 | 0.930 | 1.047 |
| 160827_at   | 0.282 | 1.174 | 1.067 | 1.095 | 1.209 |
| 160828_at   | 0.158 | 1.108 | 1.067 | 0.951 | 1.121 |
| 160829_at   | 0.365 | 1.285 | 1.135 | 1.199 | 1.138 |
| 160830_at   | 0.353 | 0.825 | 0.783 | 0.913 | 0.804 |
| 160831_at   | 0.369 | 0.984 | 0.979 | 1.013 | 0.932 |
| 160832_at   | 0.142 | 1.106 | 1.073 | 1.070 | 0.986 |
| 160833_at   | 0.193 | 1.122 | 1.087 | 0.959 | 1.086 |
| 160834_at   | 0.115 | 1.185 | 1.129 | 1.028 | 1.248 |
| 160835_i_at | 0.495 | 1.003 | 1.042 | 1.027 | 1.044 |
| 160836_at   | 0.204 | 0.960 | 1.055 | 0.951 | 1.074 |
| 160837_at   | 0.270 | 0.860 | 0.831 | 0.955 | 0.891 |
| 160838_at   | 0.402 | 0.863 | 0.877 | 0.912 | 0.887 |

|             |       |       |       |       |       |
|-------------|-------|-------|-------|-------|-------|
| 160839_at   | 0.366 | 0.889 | 0.839 | 0.924 | 0.888 |
| 160840_at   | 0.375 | 1.090 | 1.033 | 0.991 | 1.075 |
| 160841_at   | 0.449 | 1.198 | 1.026 | 1.096 | 0.906 |
| 160842_at   | 0.468 | 1.044 | 1.063 | 0.999 | 1.063 |
| 160843_at   | 0.095 | 0.790 | 0.915 | 0.988 | 1.052 |
| 160844_at   | 0.346 | 1.039 | 1.008 | 0.956 | 1.050 |
| 160845_at   | 0.176 | 0.867 | 0.934 | 0.966 | 0.942 |
| 160846_at   | 0.055 | 0.941 | 1.075 | 0.982 | 1.059 |
| 160847_at   | 0.379 | 1.108 | 1.080 | 1.003 | 1.141 |
| 160848_at   | 0.324 | 1.291 | 1.246 | 1.107 | 1.316 |
| 160849_at   | 0.424 | 1.104 | 1.104 | 1.032 | 1.081 |
| 160850_at   | 0.494 | 0.920 | 0.922 | 0.917 | 0.949 |
| 160851_r_at | 0.291 | 0.841 | 0.740 | 1.144 | 0.768 |
| 160852_at   | 0.390 | 0.833 | 0.815 | 0.909 | 0.809 |
| 160853_at   | 0.156 | 0.995 | 0.920 | 0.990 | 1.005 |
| 160854_at   | 0.196 | 1.065 | 1.042 | 1.004 | 1.119 |
| 160855_at   | 0.396 | 0.945 | 0.872 | 0.951 | 0.921 |
| 160856_at   | 0.101 | 0.886 | 0.963 | 0.916 | 0.984 |
| 160857_at   | 0.184 | 1.342 | 1.222 | 0.998 | 1.297 |
| 160858_at   | 0.433 | 0.906 | 0.918 | 0.945 | 0.923 |
| 160859_s_at | 0.288 | 1.315 | 1.168 | 1.044 | 1.197 |
| 160860_at   | 0.272 | 1.009 | 1.041 | 1.222 | 1.037 |
| 160861_s_at | 0.410 | 0.848 | 0.864 | 0.915 | 0.856 |
| 160862_at   | 0.163 | 1.066 | 1.038 | 1.110 | 0.947 |
| 160863_at   | 0.383 | 0.887 | 0.891 | 0.903 | 0.817 |
| 160864_at   | 0.271 | 0.929 | 0.812 | 0.938 | 0.868 |
| 160865_at   | 0.287 | 0.920 | 0.865 | 0.939 | 0.919 |
| 160866_at   | 0.463 | 1.050 | 1.027 | 1.016 | 1.035 |
| 160867_at   | 0.333 | 1.110 | 1.031 | 1.109 | 1.052 |
| 160868_at   | 0.475 | 0.886 | 0.845 | 0.923 | 0.868 |
| 160869_at   | 0.332 | 0.945 | 0.885 | 1.024 | 0.901 |
| 160870_at   | 0.499 | 0.910 | 0.878 | 0.931 | 0.886 |
| 160871_at   | 0.377 | 0.906 | 0.884 | 1.004 | 0.908 |
| 160872_f_at | 0.261 | 1.064 | 1.025 | 1.068 | 1.111 |
| 160873_at   | 0.224 | 0.900 | 1.004 | 0.919 | 0.873 |
| 160874_r_at | 0.318 | 0.896 | 0.827 | 0.980 | 0.873 |
| 160875_at   | 0.140 | 0.980 | 0.984 | 0.942 | 1.037 |
| 160876_at   | 0.048 | 1.360 | 2.185 | 1.118 | 1.600 |
| 160877_at   | 0.345 | 1.126 | 1.047 | 1.050 | 1.126 |
| 160878_at   | 0.384 | 1.026 | 1.028 | 1.043 | 0.999 |
| 160879_at   | 0.197 | 0.919 | 0.861 | 0.931 | 0.936 |
| 160880_at   | 0.200 | 0.910 | 0.833 | 0.934 | 0.836 |
| 160881_at   | 0.480 | 0.878 | 0.894 | 0.902 | 0.864 |
| 160882_at   | 0.262 | 0.800 | 0.825 | 0.906 | 0.795 |
| 160883_at   | 0.184 | 0.839 | 0.791 | 0.906 | 0.887 |
| 160884_at   | 0.301 | 1.027 | 0.957 | 0.900 | 1.019 |
| 160885_at   | 0.183 | 1.335 | 1.420 | 1.080 | 1.397 |

|             |       |       |       |       |       |
|-------------|-------|-------|-------|-------|-------|
| 160886_i_at | 0.363 | 1.008 | 1.004 | 1.039 | 0.987 |
| 160887_at   | 0.117 | 1.118 | 0.888 | 0.952 | 1.014 |
| 160888_at   | 0.402 | 1.066 | 1.048 | 1.041 | 1.030 |
| 160889_at   | 0.178 | 1.115 | 1.201 | 0.961 | 1.236 |
| 160890_at   | 0.308 | 1.237 | 1.342 | 1.051 | 1.281 |
| 160891_at   | 0.284 | 0.981 | 0.907 | 1.073 | 1.002 |
| 160892_at   | 0.201 | 0.944 | 0.861 | 0.955 | 0.929 |
| 160893_at   | 0.209 | 0.919 | 1.000 | 0.919 | 1.060 |
| 160894_at   | 0.354 | 1.183 | 1.565 | 1.207 | 1.404 |
| 160895_at   | 0.280 | 0.973 | 0.909 | 0.993 | 0.907 |
| 160896_at   | 0.401 | 1.201 | 1.300 | 1.040 | 1.199 |
| 160897_at   | 0.308 | 1.215 | 0.930 | 1.109 | 1.167 |
| 160898_at   | 0.338 | 1.056 | 1.035 | 1.004 | 1.044 |
| 160899_at   | 0.361 | 1.035 | 0.936 | 1.052 | 1.035 |
| 160900_at   | 0.158 | 1.268 | 1.104 | 1.091 | 1.060 |
| 160901_at   | 0.323 | 1.271 | 1.242 | 1.054 | 1.086 |
| 160902_at   | 0.091 | 0.918 | 0.860 | 0.989 | 0.834 |
| 160903_at   | 0.411 | 1.103 | 1.042 | 1.045 | 1.093 |
| 160904_at   | 0.316 | 0.919 | 0.936 | 1.028 | 0.960 |
| 160905_s_at | 0.280 | 1.034 | 0.959 | 0.974 | 0.991 |
| 160906_i_at | 0.181 | 0.747 | 0.884 | 0.644 | 1.678 |
| 160907_at   | 0.411 | 1.013 | 0.973 | 0.979 | 1.023 |
| 160908_r_at | 0.228 | 1.338 | 1.179 | 1.262 | 1.109 |
| 160909_at   | 0.411 | 0.856 | 0.844 | 0.947 | 0.842 |
| 160910_at   | 0.477 | 0.862 | 0.865 | 0.926 | 0.840 |
| 160911_at   | 0.331 | 0.968 | 0.991 | 1.043 | 0.985 |
| 160912_i_at | 0.276 | 0.886 | 0.912 | 0.949 | 0.923 |
| 160913_at   | 0.354 | 0.864 | 0.872 | 1.034 | 0.883 |
| 160914_at   | 0.261 | 0.869 | 0.831 | 0.933 | 0.909 |
| 160915_at   | 0.414 | 0.917 | 0.885 | 0.954 | 0.884 |
| 160916_at   | 0.198 | 0.926 | 0.926 | 1.010 | 1.024 |
| 160917_r_at | 0.350 | 1.070 | 1.013 | 1.039 | 1.070 |
| 160918_at   | 0.189 | 0.866 | 0.838 | 0.792 | 1.005 |
| 160919_r_at | 0.115 | 1.095 | 0.964 | 1.092 | 1.041 |
| 160920_at   | 0.421 | 1.031 | 0.991 | 0.990 | 1.024 |
| 160921_at   | 0.354 | 1.455 | 1.700 | 1.251 | 1.391 |
| 160922_at   | 0.352 | 1.025 | 0.923 | 0.973 | 0.923 |
| 160923_at   | 0.331 | 0.878 | 0.843 | 0.947 | 0.847 |
| 160924_at   | 0.113 | 1.162 | 1.024 | 0.991 | 1.069 |
| 160925_at   | 0.353 | 1.025 | 1.009 | 1.009 | 1.112 |
| 160926_r_at | 0.235 | 0.823 | 0.843 | 0.781 | 0.766 |
| 160927_at   | 0.207 | 1.256 | 1.074 | 1.166 | 1.058 |
| 160928_at   | 0.500 | 0.970 | 0.949 | 0.997 | 0.953 |
| 160929_at   | 0.367 | 0.922 | 0.904 | 0.937 | 0.904 |
| 160930_at   | 0.349 | 1.124 | 1.149 | 1.015 | 1.094 |
| 160931_at   | 0.323 | 1.208 | 1.151 | 1.081 | 1.188 |
| 160932_at   | 0.308 | 0.988 | 0.947 | 0.954 | 1.014 |

|             |       |       |       |       |       |
|-------------|-------|-------|-------|-------|-------|
| 160933_at   | 0.219 | 1.030 | 1.113 | 0.927 | 1.100 |
| 160934_s_at | 0.243 | 0.736 | 0.837 | 0.731 | 1.298 |
| 160935_at   | 0.379 | 1.099 | 1.127 | 1.132 | 1.167 |
| 160936_at   | 0.327 | 0.910 | 1.138 | 0.985 | 1.087 |
| 160937_at   | 0.298 | 0.958 | 0.979 | 0.894 | 0.998 |
| 160938_at   | 0.328 | 0.907 | 0.862 | 0.965 | 0.872 |
| 160939_at   | 0.263 | 0.869 | 0.811 | 0.920 | 0.828 |
| 160940_at   | 0.422 | 0.882 | 0.807 | 0.900 | 0.862 |
| 160941_at   | 0.301 | 1.128 | 1.023 | 1.093 | 1.143 |
| 160942_at   | 0.375 | 1.070 | 1.092 | 1.080 | 1.026 |
| 160943_at   | 0.200 | 0.798 | 0.768 | 0.877 | 0.800 |
| 160944_at   | 0.232 | 0.974 | 0.978 | 0.941 | 0.937 |
| 160945_at   | 0.372 | 0.939 | 0.914 | 0.916 | 0.954 |
| 160946_at   | 0.397 | 0.914 | 0.941 | 0.946 | 0.925 |
| 160947_at   | 0.153 | 1.053 | 0.954 | 0.948 | 0.910 |
| 160948_at   | 0.338 | 1.006 | 1.024 | 1.068 | 0.978 |
| 160949_at   | 0.449 | 1.110 | 1.181 | 1.039 | 1.126 |
| 160950_at   | 0.401 | 0.826 | 0.808 | 0.809 | 0.817 |
| 160951_at   | 0.478 | 0.935 | 0.896 | 0.914 | 0.903 |
| 160952_r_at | 0.305 | 0.983 | 0.975 | 0.990 | 0.936 |
| 160953_at   | 0.287 | 0.881 | 0.792 | 0.929 | 0.882 |
| 160954_at   | 0.298 | 0.845 | 0.803 | 0.917 | 0.876 |
| 160955_at   | 0.186 | 1.016 | 1.045 | 0.927 | 1.020 |
| 160956_r_at | 0.448 | 1.042 | 1.026 | 1.048 | 1.045 |
| 160957_at   | 0.393 | 1.147 | 1.086 | 1.055 | 1.147 |
| 160958_at   | 0.366 | 1.050 | 1.052 | 0.975 | 1.099 |
| 160959_at   | 0.461 | 1.216 | 1.259 | 1.110 | 1.194 |
| 160960_at   | 0.320 | 1.041 | 1.120 | 1.045 | 1.046 |
| 160961_at   | 0.298 | 1.310 | 1.152 | 1.133 | 1.227 |
| 160962_at   | 0.090 | 0.934 | 0.868 | 1.017 | 0.922 |
| 160963_at   | 0.155 | 1.307 | 1.227 | 1.076 | 1.186 |
| 160964_at   | 0.301 | 0.932 | 0.897 | 0.999 | 0.960 |
| 160965_at   | 0.484 | 1.298 | 1.319 | 1.227 | 1.272 |
| 160966_at   | 0.110 | 1.096 | 0.958 | 1.000 | 0.891 |
| 160967_at   | 0.337 | 0.900 | 0.845 | 0.925 | 0.880 |
| 160968_at   | 0.168 | 1.061 | 0.968 | 1.037 | 1.136 |
| 160969_at   | 0.322 | 0.873 | 0.822 | 0.958 | 0.874 |
| 160970_at   | 0.405 | 1.284 | 1.177 | 1.107 | 1.180 |
| 160971_at   | 0.165 | 1.086 | 0.935 | 1.078 | 1.073 |
| 160972_at   | 0.331 | 0.964 | 0.913 | 1.014 | 0.979 |
| 160973_at   | 0.165 | 1.063 | 1.139 | 0.992 | 1.181 |
| 160974_at   | 0.433 | 0.920 | 0.896 | 0.962 | 0.916 |
| 160975_at   | 0.386 | 1.136 | 1.049 | 1.043 | 1.103 |
| 160976_at   | 0.316 | 1.283 | 1.166 | 1.079 | 1.229 |
| 160977_at   | 0.310 | 1.276 | 1.166 | 1.119 | 1.220 |
| 160978_at   | 0.299 | 0.934 | 0.863 | 0.967 | 0.893 |
| 160979_at   | 0.304 | 1.465 | 1.365 | 1.063 | 1.369 |

|             |       |       |       |       |       |
|-------------|-------|-------|-------|-------|-------|
| 160980_at   | 0.346 | 0.943 | 0.977 | 1.009 | 0.931 |
| 160981_at   | 0.277 | 1.031 | 0.933 | 1.006 | 0.992 |
| 160982_at   | 0.411 | 1.174 | 1.158 | 1.079 | 1.151 |
| 160983_at   | 0.380 | 0.867 | 0.852 | 0.921 | 0.894 |
| 160984_r_at | 0.191 | 1.009 | 1.013 | 1.009 | 0.969 |
| 160985_at   | 0.345 | 0.859 | 0.866 | 0.910 | 0.913 |
| 160986_r_at | 0.260 | 1.034 | 0.951 | 0.952 | 1.003 |
| 160987_r_at | 0.478 | 0.919 | 0.885 | 0.910 | 0.897 |
| 160988_r_at | 0.376 | 0.939 | 0.953 | 0.979 | 0.998 |
| 160989_r_at | 0.401 | 1.003 | 0.921 | 0.913 | 0.943 |
| 160990_r_at | 0.294 | 1.090 | 1.035 | 1.049 | 1.076 |
| 160991_at   | 0.211 | 1.004 | 0.847 | 1.001 | 0.956 |
| 160992_at   | 0.115 | 1.044 | 1.077 | 0.961 | 1.045 |
| 160993_at   | 0.484 | 0.884 | 0.904 | 0.922 | 0.901 |
| 160994_at   | 0.411 | 1.054 | 0.991 | 1.007 | 1.045 |
| 160995_at   | 0.411 | 0.908 | 0.878 | 0.931 | 0.825 |
| 160996_at   | 0.408 | 0.866 | 0.803 | 0.850 | 0.834 |
| 160997_at   | 0.208 | 1.049 | 0.923 | 1.023 | 0.996 |
| 160998_at   | 0.178 | 0.910 | 0.936 | 0.996 | 0.979 |
| 160999_r_at | 0.117 | 0.976 | 0.868 | 0.948 | 0.919 |
| 161000_i_at | 0.162 | 0.968 | 1.098 | 0.951 | 1.202 |
| 161001_at   | 0.190 | 1.002 | 0.965 | 0.969 | 0.922 |
| 161002_at   | 0.072 | 0.987 | 1.026 | 1.024 | 1.065 |
| 161003_at   | 0.264 | 0.898 | 0.863 | 0.975 | 0.965 |
| 161004_at   | 0.185 | 0.926 | 1.086 | 0.953 | 0.994 |
| 161005_at   | 0.169 | 1.277 | 1.337 | 1.091 | 1.291 |
| 161006_at   | 0.379 | 1.133 | 1.072 | 1.049 | 1.183 |
| 161007_at   | 0.384 | 0.847 | 0.819 | 0.936 | 0.848 |
| 161008_at   | 0.376 | 0.866 | 0.856 | 0.966 | 0.881 |
| 161009_at   | 0.110 | 0.993 | 0.909 | 0.977 | 0.986 |
| 161010_r_at | 0.145 | 1.206 | 1.107 | 1.065 | 1.101 |
| 161011_at   | 0.369 | 1.126 | 1.154 | 1.002 | 1.062 |
| 161012_at   | 0.051 | 0.728 | 1.015 | 0.678 | 0.763 |
| 161013_f_at | 0.341 | 1.491 | 1.324 | 1.327 | 1.433 |
| 161014_at   | 0.203 | 1.025 | 0.944 | 0.993 | 1.061 |
| 161015_at   | 0.275 | 0.998 | 0.977 | 1.041 | 0.927 |
| 161016_at   | 0.318 | 1.153 | 1.153 | 1.020 | 1.223 |
| 161017_at   | 0.384 | 0.825 | 0.779 | 0.874 | 0.824 |
| 161018_at   | 0.245 | 1.046 | 0.984 | 0.937 | 1.043 |
| 161019_at   | 0.375 | 1.143 | 1.089 | 1.098 | 1.116 |
| 161020_r_at | 0.406 | 1.118 | 1.077 | 1.039 | 1.102 |
| 161021_at   | 0.133 | 0.943 | 0.975 | 0.993 | 0.900 |
| 161022_at   | 0.233 | 0.980 | 0.895 | 0.992 | 0.977 |
| 161023_at   | 0.098 | 0.924 | 0.895 | 0.980 | 0.917 |
| 161024_at   | 0.378 | 0.867 | 0.812 | 0.924 | 0.813 |
| 161025_f_at | 0.071 | 1.031 | 0.893 | 0.946 | 1.010 |
| 161026_s_at | 0.411 | 1.039 | 0.998 | 1.006 | 1.033 |

|             |       |       |       |       |       |
|-------------|-------|-------|-------|-------|-------|
| 161027_f_at | 0.445 | 1.051 | 1.030 | 1.001 | 0.993 |
| 161028_at   | 0.452 | 1.130 | 1.093 | 1.083 | 1.090 |
| 161029_at   | 0.155 | 0.965 | 1.029 | 0.999 | 1.066 |
| 161030_at   | 0.281 | 0.970 | 0.908 | 1.007 | 0.931 |
| 161031_at   | 0.483 | 0.941 | 0.927 | 0.984 | 0.944 |
| 161032_i_at | 0.383 | 0.829 | 0.771 | 0.900 | 0.848 |
| 161033_at   | 0.425 | 0.878 | 0.833 | 0.905 | 0.867 |
| 161034_at   | 0.327 | 0.855 | 0.883 | 0.909 | 0.882 |
| 161035_at   | 0.193 | 1.133 | 0.959 | 1.016 | 0.992 |
| 161036_at   | 0.208 | 0.969 | 0.920 | 1.006 | 0.968 |
| 161037_at   | 0.470 | 1.022 | 1.027 | 1.001 | 1.018 |
| 161038_at   | 0.112 | 0.887 | 0.979 | 1.001 | 0.991 |
| 161039_at   | 0.495 | 0.914 | 0.878 | 0.931 | 0.876 |
| 161040_at   | 0.081 | 0.854 | 0.906 | 1.074 | 0.981 |
| 161041_at   | 0.399 | 0.848 | 0.838 | 0.923 | 0.867 |
| 161042_at   | 0.254 | 0.948 | 1.001 | 0.944 | 0.910 |
| 161043_r_at | 0.477 | 0.965 | 0.951 | 0.993 | 0.987 |
| 161044_at   | 0.409 | 0.950 | 0.944 | 0.976 | 0.953 |
| 161045_at   | 0.227 | 0.908 | 0.851 | 0.955 | 0.906 |
| 161046_at   | 0.312 | 1.139 | 1.034 | 1.034 | 1.132 |
| 161047_at   | 0.475 | 0.850 | 0.832 | 0.911 | 0.851 |
| 161048_at   | 0.372 | 0.827 | 0.795 | 0.937 | 0.778 |
| 161049_at   | 0.240 | 0.888 | 0.871 | 1.021 | 0.844 |
| 161050_at   | 0.118 | 1.361 | 1.268 | 1.085 | 1.318 |
| 161051_at   | 0.505 | 0.845 | 0.791 | 0.867 | 0.782 |
| 161052_r_at | 0.294 | 0.867 | 0.846 | 0.954 | 0.834 |
| 161053_at   | 0.504 | 0.914 | 0.919 | 0.922 | 0.900 |
| 161054_at   | 0.391 | 0.894 | 0.854 | 0.926 | 0.853 |
| 161055_r_at | 0.337 | 1.024 | 1.002 | 1.050 | 1.025 |
| 161056_at   | 0.354 | 0.971 | 0.947 | 0.949 | 0.960 |
| 161057_at   | 0.109 | 0.950 | 0.865 | 0.947 | 0.926 |
| 161058_f_at | 0.369 | 0.973 | 0.927 | 0.989 | 0.996 |
| 161059_at   | 0.411 | 0.901 | 0.880 | 0.948 | 0.930 |
| 161060_i_at | 0.422 | 1.080 | 1.075 | 0.981 | 1.027 |
| 161061_r_at | 0.488 | 1.062 | 1.039 | 1.013 | 1.034 |
| 161062_r_at | 0.490 | 0.986 | 0.979 | 0.975 | 0.999 |
| 161063_r_at | 0.399 | 0.877 | 0.855 | 0.937 | 0.875 |
| 161064_f_at | 0.196 | 0.971 | 0.917 | 0.874 | 0.943 |
| 161065_at   | 0.475 | 0.835 | 0.829 | 0.870 | 0.788 |
| 161066_at   | 0.218 | 1.077 | 0.968 | 0.957 | 1.067 |
| 161067_at   | 0.261 | 0.879 | 0.820 | 0.931 | 0.881 |
| 161068_at   | 0.492 | 0.814 | 0.812 | 0.858 | 0.777 |
| 161069_at   | 0.286 | 0.935 | 0.888 | 0.971 | 0.887 |
| 161070_at   | 0.303 | 1.193 | 1.139 | 1.210 | 1.131 |
| 161071_at   | 0.297 | 0.924 | 0.852 | 0.943 | 0.903 |
| 161072_at   | 0.375 | 0.901 | 0.924 | 0.923 | 0.904 |
| 161073_at   | 0.408 | 0.935 | 0.886 | 0.936 | 0.894 |



|             |       |       |       |       |       |
|-------------|-------|-------|-------|-------|-------|
| 161074_at   | 0.273 | 1.224 | 1.084 | 1.051 | 1.138 |
| 161075_at   | 0.140 | 1.155 | 0.965 | 1.064 | 1.156 |
| 161076_at   | 0.435 | 1.055 | 1.105 | 1.110 | 1.155 |
| 161077_f_at | 0.045 | 1.420 | 1.382 | 1.027 | 1.305 |
| 161078_at   | 0.367 | 0.904 | 0.851 | 0.934 | 0.885 |
| 161079_at   | 0.147 | 0.929 | 0.845 | 0.899 | 0.950 |
| 161080_f_at | 0.378 | 1.182 | 1.193 | 1.086 | 1.144 |
| 161081_at   | 0.324 | 1.282 | 1.214 | 1.018 | 1.374 |
| 161082_r_at | 0.502 | 0.808 | 0.771 | 0.869 | 0.778 |
| 161083_at   | 0.291 | 1.058 | 1.020 | 1.060 | 1.096 |
| 161084_at   | 0.371 | 0.932 | 0.902 | 0.953 | 0.931 |
| 161085_r_at | 0.467 | 0.782 | 0.773 | 0.806 | 0.691 |
| 161086_at   | 0.220 | 0.834 | 0.908 | 0.929 | 1.071 |
| 161087_r_at | 0.454 | 1.031 | 0.997 | 1.059 | 0.957 |
| 161088_r_at | 0.188 | 0.871 | 0.800 | 0.892 | 0.801 |
| 161089_r_at | 0.378 | 0.974 | 1.001 | 0.992 | 0.937 |
| 161090_i_at | 0.389 | 0.776 | 0.761 | 0.860 | 0.813 |
| 161091_r_at | 0.433 | 0.896 | 0.863 | 0.926 | 0.886 |
| 161092_at   | 0.375 | 0.868 | 0.854 | 0.909 | 0.915 |
| 161093_at   | 0.463 | 0.998 | 0.968 | 0.971 | 0.985 |
| 161094_r_at | 0.488 | 0.899 | 0.870 | 0.940 | 0.892 |
| 161095_i_at | 0.386 | 0.985 | 1.001 | 1.028 | 1.020 |
| 161096_at   | 0.249 | 0.988 | 0.862 | 0.964 | 0.906 |
| 161097_at   | 0.449 | 0.877 | 0.827 | 0.871 | 0.832 |
| 161098_at   | 0.325 | 0.800 | 0.796 | 0.853 | 0.840 |
| 161099_at   | 0.222 | 1.038 | 0.987 | 0.961 | 1.043 |
| 161100_at   | 0.481 | 1.047 | 1.014 | 1.030 | 1.001 |
| 161101_r_at | 0.419 | 0.935 | 0.871 | 0.937 | 0.887 |
| 161102_at   | 0.411 | 1.013 | 0.944 | 1.004 | 0.972 |
| 161103_at   | 0.134 | 1.054 | 0.942 | 0.985 | 0.980 |
| 161104_at   | 0.207 | 1.436 | 1.641 | 1.207 | 1.688 |
| 161105_at   | 0.373 | 0.849 | 0.823 | 0.927 | 0.870 |
| 161106_r_at | 0.323 | 0.876 | 0.768 | 0.894 | 0.754 |
| 161107_r_at | 0.445 | 0.924 | 0.872 | 0.943 | 0.913 |
| 161108_r_at | 0.505 | 0.819 | 0.791 | 0.847 | 0.757 |
| 161109_at   | 0.347 | 1.009 | 1.029 | 0.943 | 1.037 |
| 161110_at   | 0.350 | 0.895 | 0.879 | 0.957 | 0.868 |
| 161111_f_at | 0.244 | 0.869 | 0.832 | 0.969 | 0.893 |
| 161112_at   | 0.475 | 0.858 | 0.813 | 0.886 | 0.839 |
| 161113_at   | 0.443 | 0.907 | 0.881 | 0.897 | 0.871 |
| 161114_i_at | 0.322 | 0.908 | 0.938 | 0.885 | 0.910 |
| 161115_r_at | 0.467 | 0.871 | 0.844 | 0.915 | 0.850 |
| 161116_at   | 0.353 | 0.837 | 0.871 | 0.922 | 0.886 |
| 161117_at   | 0.422 | 0.983 | 0.973 | 1.018 | 0.994 |
| 161118_r_at | 0.502 | 0.967 | 0.962 | 0.966 | 0.967 |
| 161119_at   | 0.459 | 0.936 | 0.899 | 0.943 | 0.930 |
| 161120_r_at | 0.184 | 0.848 | 0.786 | 1.003 | 0.813 |

|             |       |       |       |       |       |
|-------------|-------|-------|-------|-------|-------|
| 161121_f_at | 0.081 | 1.089 | 1.160 | 1.001 | 1.005 |
| 161122_f_at | 0.500 | 1.160 | 1.175 | 1.142 | 1.147 |
| 161123_i_at | 0.218 | 0.916 | 0.806 | 0.890 | 0.889 |
| 161124_at   | 0.287 | 0.860 | 0.787 | 0.945 | 0.869 |
| 161125_at   | 0.276 | 0.853 | 0.790 | 0.901 | 0.772 |
| 161126_at   | 0.297 | 0.904 | 0.833 | 0.952 | 0.947 |
| 161127_i_at | 0.463 | 1.102 | 1.133 | 1.029 | 1.132 |
| 161128_r_at | 0.477 | 0.953 | 0.956 | 0.977 | 0.942 |
| 161129_r_at | 0.171 | 0.863 | 0.815 | 0.953 | 0.845 |
| 161130_f_at | 0.241 | 0.963 | 0.893 | 0.954 | 0.956 |
| 161131_r_at | 0.375 | 0.853 | 0.751 | 0.815 | 0.787 |
| 161132_at   | 0.245 | 1.403 | 1.188 | 1.069 | 1.325 |
| 161133_at   | 0.475 | 0.800 | 0.778 | 0.859 | 0.776 |
| 161134_at   | 0.461 | 0.894 | 0.860 | 0.897 | 0.881 |
| 161135_f_at | 0.326 | 0.830 | 0.764 | 0.888 | 0.867 |
| 161136_r_at | 0.349 | 0.933 | 0.912 | 0.978 | 0.951 |
| 161137_r_at | 0.459 | 0.911 | 0.866 | 0.923 | 0.871 |
| 161138_r_at | 0.366 | 0.907 | 0.896 | 0.946 | 0.941 |
| 161139_f_at | 0.335 | 0.993 | 0.991 | 1.030 | 1.050 |
| 161140_r_at | 0.458 | 0.819 | 0.769 | 0.886 | 0.798 |
| 161141_r_at | 0.459 | 1.016 | 1.029 | 0.986 | 1.020 |
| 161142_at   | 0.346 | 0.978 | 0.919 | 1.040 | 0.973 |
| 161143_r_at | 0.265 | 0.802 | 0.775 | 0.932 | 0.756 |
| 161144_r_at | 0.322 | 0.878 | 0.897 | 0.957 | 0.841 |
| 161145_f_at | 0.190 | 1.037 | 1.105 | 1.036 | 0.998 |
| 161146_r_at | 0.474 | 0.926 | 0.884 | 0.952 | 0.900 |
| 161147_f_at | 0.281 | 1.096 | 1.153 | 1.010 | 1.203 |
| 161148_f_at | 0.276 | 0.968 | 0.885 | 0.944 | 0.919 |
| 161149_r_at | 0.472 | 0.782 | 0.768 | 0.808 | 0.674 |
| 161150_at   | 0.158 | 0.879 | 0.883 | 1.003 | 0.876 |
| 161151_at   | 0.254 | 0.868 | 0.780 | 0.918 | 0.859 |
| 161152_r_at | 0.478 | 0.769 | 0.694 | 0.817 | 0.755 |
| 161153_r_at | 0.377 | 0.883 | 0.861 | 0.942 | 0.884 |
| 161154_at   | 0.292 | 0.890 | 0.817 | 0.982 | 0.869 |
| 161155_r_at | 0.375 | 0.861 | 0.793 | 0.921 | 0.863 |
| 161156_r_at | 0.169 | 0.841 | 0.849 | 0.999 | 0.846 |
| 161157_r_at | 0.308 | 0.949 | 0.907 | 1.018 | 0.950 |
| 161158_f_at | 0.350 | 0.995 | 1.021 | 0.999 | 0.971 |
| 161159_r_at | 0.393 | 0.839 | 0.821 | 0.905 | 0.848 |
| 161160_f_at | 0.421 | 0.907 | 0.896 | 0.970 | 0.899 |
| 161161_r_at | 0.323 | 0.964 | 0.865 | 0.971 | 0.992 |
| 161162_at   | 0.222 | 0.823 | 0.808 | 0.956 | 0.836 |
| 161163_at   | 0.339 | 0.977 | 0.906 | 1.018 | 0.899 |
| 161164_r_at | 0.302 | 0.991 | 0.975 | 0.982 | 1.026 |
| 161165_f_at | 0.093 | 1.042 | 1.012 | 1.046 | 0.956 |
| 161166_i_at | 0.350 | 0.934 | 0.885 | 0.968 | 0.952 |
| 161167_r_at | 0.181 | 0.855 | 0.965 | 0.915 | 0.898 |

|             |       |       |       |       |       |
|-------------|-------|-------|-------|-------|-------|
| 161168_at   | 0.371 | 0.863 | 0.876 | 0.931 | 0.896 |
| 161169_f_at | 0.383 | 1.003 | 0.989 | 1.004 | 1.050 |
| 161170_r_at | 0.480 | 0.993 | 0.994 | 0.979 | 0.982 |
| 161171_at   | 0.379 | 0.966 | 0.907 | 0.985 | 0.921 |
| 161172_f_at | 0.151 | 0.936 | 0.931 | 0.881 | 1.000 |
| 161173_f_at | 0.232 | 0.977 | 0.947 | 0.968 | 1.031 |
| 161174_i_at | 0.324 | 0.784 | 0.751 | 0.860 | 0.806 |
| 161175_r_at | 0.328 | 0.915 | 0.873 | 0.964 | 0.912 |
| 161176_r_at | 0.245 | 0.886 | 0.820 | 0.975 | 0.874 |
| 161177_f_at | 0.494 | 0.879 | 0.892 | 0.899 | 0.871 |
| 161178_at   | 0.405 | 0.867 | 0.852 | 0.892 | 0.882 |
| 161179_at   | 0.212 | 0.855 | 0.829 | 0.936 | 0.910 |
| 161180_r_at | 0.243 | 0.849 | 0.808 | 0.935 | 0.858 |
| 161181_f_at | 0.386 | 0.988 | 0.936 | 0.984 | 0.943 |
| 161182_r_at | 0.220 | 0.986 | 0.978 | 0.930 | 0.944 |
| 161183_at   | 0.359 | 1.100 | 1.011 | 0.997 | 1.167 |
| 161184_f_at | 0.220 | 1.430 | 1.376 | 1.087 | 1.363 |
| 161185_i_at | 0.365 | 0.969 | 0.905 | 0.974 | 0.943 |
| 161186_f_at | 0.314 | 0.955 | 0.921 | 0.916 | 0.952 |
| 161187_f_at | 0.257 | 0.984 | 0.986 | 0.944 | 0.949 |
| 161188_f_at | 0.196 | 0.972 | 0.855 | 0.958 | 0.949 |
| 161189_r_at | 0.296 | 0.919 | 0.890 | 0.941 | 0.867 |
| 161190_r_at | 0.499 | 0.906 | 0.903 | 0.903 | 0.878 |
| 161191_i_at | 0.477 | 0.934 | 0.920 | 0.950 | 0.870 |
| 161192_at   | 0.188 | 0.938 | 0.805 | 0.950 | 0.906 |
| 161193_r_at | 0.440 | 0.792 | 0.776 | 0.847 | 0.673 |
| 161194_r_at | 0.429 | 0.862 | 0.804 | 0.851 | 0.834 |
| 161195_i_at | 0.436 | 0.908 | 0.909 | 0.959 | 0.939 |
| 161196_r_at | 0.274 | 0.908 | 0.874 | 0.969 | 0.899 |
| 161197_r_at | 0.362 | 0.871 | 0.864 | 0.960 | 0.884 |
| 161198_r_at | 0.368 | 0.834 | 0.788 | 0.903 | 0.787 |
| 161199_at   | 0.212 | 0.902 | 1.033 | 0.975 | 0.976 |
| 161200_i_at | 0.391 | 0.921 | 0.886 | 0.989 | 0.892 |
| 161201_r_at | 0.240 | 0.904 | 0.831 | 0.992 | 0.844 |
| 161202_r_at | 0.232 | 0.913 | 0.870 | 0.958 | 0.933 |
| 161203_f_at | 0.263 | 1.048 | 0.969 | 1.032 | 0.971 |
| 161204_r_at | 0.379 | 1.001 | 0.958 | 0.980 | 0.958 |
| 161205_at   | 0.280 | 0.925 | 0.792 | 1.312 | 0.831 |
| 161206_at   | 0.397 | 0.850 | 0.793 | 0.916 | 0.847 |
| 161207_at   | 0.407 | 0.943 | 0.932 | 0.991 | 0.956 |
| 161208_r_at | 0.500 | 0.758 | 0.730 | 0.810 | 0.746 |
| 161209_r_at | 0.292 | 0.978 | 0.886 | 1.027 | 0.905 |
| 161210_f_at | 0.270 | 0.868 | 0.794 | 0.934 | 0.895 |
| 161211_r_at | 0.492 | 0.883 | 0.864 | 0.896 | 0.854 |
| 161212_r_at | 0.390 | 0.876 | 0.843 | 0.919 | 0.886 |
| 161213_r_at | 0.353 | 0.947 | 0.868 | 0.936 | 0.908 |
| 161214_r_at | 0.298 | 1.481 | 1.131 | 1.048 | 1.190 |

|             |       |       |       |       |       |
|-------------|-------|-------|-------|-------|-------|
| 161215_at   | 0.438 | 0.839 | 0.851 | 0.914 | 0.808 |
| 161216_at   | 0.356 | 0.902 | 0.898 | 0.968 | 0.919 |
| 161217_r_at | 0.140 | 0.876 | 0.745 | 0.945 | 0.792 |
| 161218_r_at | 0.281 | 0.980 | 1.036 | 1.006 | 0.961 |
| 161219_r_at | 0.295 | 0.871 | 0.844 | 0.947 | 0.862 |
| 161220_f_at | 0.459 | 0.889 | 0.839 | 0.902 | 0.802 |
| 161221_f_at | 0.325 | 1.004 | 0.988 | 1.048 | 1.043 |
| 161222_r_at | 0.426 | 0.951 | 0.962 | 0.955 | 0.957 |
| 161223_r_at | 0.390 | 0.887 | 0.800 | 0.905 | 0.845 |
| 161224_f_at | 0.206 | 1.243 | 1.124 | 1.311 | 1.111 |
| 161225_r_at | 0.291 | 0.958 | 0.979 | 0.949 | 0.959 |
| 161226_f_at | 0.218 | 0.998 | 0.953 | 0.959 | 1.009 |
| 161227_r_at | 0.179 | 0.851 | 0.799 | 0.973 | 0.858 |
| 161228_f_at | 0.110 | 1.048 | 0.920 | 1.017 | 0.929 |
| 161229_at   | 0.260 | 0.902 | 0.844 | 0.911 | 0.904 |
| 161230_r_at | 0.492 | 0.861 | 0.842 | 0.891 | 0.846 |
| 161231_r_at | 0.496 | 0.889 | 0.839 | 0.894 | 0.853 |
| 161232_r_at | 0.398 | 1.026 | 1.089 | 1.044 | 1.022 |
| 161233_at   | 0.405 | 0.836 | 0.853 | 0.893 | 0.857 |
| 161234_f_at | 0.298 | 1.077 | 1.066 | 0.961 | 1.060 |
| 161235_f_at | 0.251 | 1.131 | 1.061 | 0.998 | 1.057 |
| 161236_r_at | 0.317 | 0.917 | 0.939 | 0.986 | 0.932 |
| 161237_at   | 0.232 | 0.899 | 0.960 | 0.936 | 0.934 |
| 161238_f_at | 0.391 | 0.877 | 0.886 | 0.912 | 0.893 |
| 161239_r_at | 0.235 | 0.928 | 0.925 | 0.970 | 0.939 |
| 161240_f_at | 0.395 | 0.985 | 0.917 | 1.019 | 0.939 |
| 161241_at   | 0.497 | 0.975 | 0.943 | 0.976 | 0.960 |
| 161242_f_at | 0.412 | 0.969 | 0.918 | 0.982 | 0.952 |
| 161243_f_at | 0.448 | 0.905 | 0.912 | 0.955 | 0.911 |
| 161244_f_at | 0.452 | 0.952 | 0.937 | 0.960 | 0.908 |
| 161245_r_at | 0.468 | 0.976 | 0.979 | 1.038 | 0.975 |
| 161246_at   | 0.461 | 0.931 | 0.886 | 0.957 | 0.920 |
| 161247_f_at | 0.194 | 1.054 | 0.923 | 0.902 | 0.990 |
| 161248_r_at | 0.472 | 0.760 | 0.688 | 0.773 | 0.726 |
| 161249_at   | 0.429 | 0.901 | 0.901 | 0.907 | 0.916 |
| 161250_at   | 0.290 | 1.010 | 0.941 | 0.992 | 0.939 |
| 161251_f_at | 0.404 | 0.935 | 0.913 | 0.919 | 0.888 |
| 161252_r_at | 0.136 | 0.817 | 0.824 | 0.996 | 0.819 |
| 161253_i_at | 0.415 | 0.920 | 0.958 | 0.979 | 0.924 |
| 161254_r_at | 0.183 | 0.871 | 0.818 | 0.912 | 0.878 |
| 161255_at   | 0.283 | 0.914 | 0.926 | 1.010 | 0.978 |
| 161256_at   | 0.314 | 0.926 | 0.877 | 0.964 | 0.939 |
| 161257_r_at | 0.343 | 0.902 | 0.866 | 0.985 | 0.958 |
| 161258_at   | 0.303 | 0.898 | 0.791 | 0.919 | 0.900 |
| 161259_f_at | 0.356 | 0.856 | 0.768 | 0.842 | 0.830 |
| 161260_f_at | 0.149 | 0.992 | 1.135 | 0.991 | 0.982 |
| 161261_f_at | 0.293 | 0.898 | 0.936 | 0.917 | 0.912 |

|             |       |       |       |       |       |
|-------------|-------|-------|-------|-------|-------|
| 161262_r_at | 0.377 | 0.798 | 0.804 | 0.831 | 0.671 |
| 161263_f_at | 0.161 | 0.945 | 0.835 | 0.922 | 0.854 |
| 161264_f_at | 0.441 | 0.936 | 0.915 | 0.974 | 0.922 |
| 161265_f_at | 0.375 | 0.842 | 0.864 | 0.869 | 0.893 |
| 161266_r_at | 0.436 | 0.952 | 0.972 | 0.963 | 0.931 |
| 161267_f_at | 0.384 | 0.968 | 0.938 | 1.007 | 0.925 |
| 161268_f_at | 0.182 | 1.014 | 0.996 | 0.913 | 0.912 |
| 161269_i_at | 0.383 | 0.984 | 0.986 | 0.965 | 0.988 |
| 161270_i_at | 0.243 | 1.410 | 1.125 | 0.838 | 1.590 |
| 161271_r_at | 0.309 | 0.794 | 0.751 | 0.763 | 0.654 |
| 161272_f_at | 0.418 | 0.952 | 0.915 | 0.935 | 0.946 |
| 161273_f_at | 0.072 | 1.073 | 0.997 | 0.960 | 1.023 |
| 161274_at   | 0.375 | 0.858 | 0.851 | 0.935 | 0.852 |
| 161275_at   | 0.308 | 0.929 | 0.889 | 0.970 | 0.995 |
| 161276_i_at | 0.219 | 0.945 | 0.881 | 0.966 | 0.938 |
| 161277_r_at | 0.496 | 0.814 | 0.810 | 0.841 | 0.792 |
| 161278_r_at | 0.401 | 0.854 | 0.816 | 0.877 | 0.796 |
| 161279_f_at | 0.481 | 1.011 | 1.010 | 0.970 | 1.013 |
| 161280_r_at | 0.155 | 0.891 | 0.849 | 1.000 | 0.920 |
| 161281_f_at | 0.286 | 0.825 | 0.749 | 0.813 | 0.672 |
| 161282_r_at | 0.220 | 0.876 | 0.848 | 0.992 | 0.903 |
| 161283_i_at | 0.243 | 0.962 | 0.907 | 1.011 | 0.898 |
| 161284_r_at | 0.380 | 0.778 | 0.762 | 0.876 | 0.753 |
| 161285_r_at | 0.359 | 0.785 | 0.785 | 0.897 | 0.807 |
| 161286_f_at | 0.298 | 1.013 | 0.943 | 0.967 | 0.952 |
| 161287_f_at | 0.438 | 0.986 | 0.939 | 0.991 | 0.977 |
| 161288_r_at | 0.454 | 0.892 | 0.858 | 0.879 | 0.867 |
| 161289_at   | 0.276 | 0.955 | 0.907 | 0.991 | 0.954 |
| 161290_r_at | 0.372 | 0.996 | 0.954 | 0.980 | 0.946 |
| 161291_at   | 0.422 | 0.953 | 0.940 | 0.929 | 0.925 |
| 161292_f_at | 0.337 | 0.968 | 0.893 | 0.987 | 0.978 |
| 161293_r_at | 0.332 | 0.818 | 0.805 | 0.842 | 0.798 |
| 161294_f_at | 0.074 | 1.081 | 0.878 | 1.051 | 1.049 |
| 161295_r_at | 0.432 | 1.029 | 1.058 | 1.024 | 1.028 |
| 161296_r_at | 0.314 | 0.980 | 0.975 | 0.954 | 0.964 |
| 161297_f_at | 0.399 | 0.935 | 0.869 | 0.931 | 0.915 |
| 161298_i_at | 0.436 | 0.795 | 0.802 | 0.894 | 0.738 |
| 161299_r_at | 0.440 | 0.744 | 0.731 | 0.808 | 0.782 |
| 161300_r_at | 0.379 | 1.009 | 0.994 | 0.976 | 0.970 |
| 161301_f_at | 0.050 | 0.962 | 0.879 | 1.000 | 0.873 |
| 161302_r_at | 0.443 | 0.806 | 0.818 | 0.837 | 0.729 |
| 161303_at   | 0.309 | 0.932 | 0.961 | 0.989 | 0.949 |
| 161304_r_at | 0.223 | 0.901 | 0.832 | 0.975 | 0.870 |
| 161305_r_at | 0.505 | 0.935 | 0.939 | 0.954 | 0.932 |
| 161306_r_at | 0.454 | 0.917 | 0.908 | 0.963 | 0.922 |
| 161307_f_at | 0.260 | 0.874 | 0.843 | 0.992 | 0.896 |
| 161308_f_at | 0.275 | 1.063 | 0.932 | 0.965 | 0.956 |

|             |       |       |       |       |       |
|-------------|-------|-------|-------|-------|-------|
| 161309_r_at | 0.450 | 0.899 | 0.871 | 0.918 | 0.890 |
| 161310_at   | 0.463 | 0.819 | 0.806 | 0.885 | 0.823 |
| 161311_at   | 0.341 | 0.825 | 0.807 | 0.965 | 0.798 |
| 161312_r_at | 0.351 | 0.972 | 0.974 | 1.013 | 0.947 |
| 161313_at   | 0.378 | 0.998 | 1.021 | 1.001 | 0.961 |
| 161314_r_at | 0.273 | 0.860 | 0.777 | 0.796 | 0.887 |
| 161315_i_at | 0.259 | 0.875 | 0.878 | 0.950 | 0.944 |
| 161316_f_at | 0.417 | 0.873 | 0.818 | 0.901 | 0.867 |
| 161317_r_at | 0.486 | 0.936 | 0.883 | 0.959 | 0.912 |
| 161318_f_at | 0.375 | 0.964 | 0.936 | 0.981 | 1.000 |
| 161319_at   | 0.390 | 0.946 | 0.853 | 0.963 | 0.900 |
| 161320_r_at | 0.354 | 0.868 | 0.886 | 0.955 | 0.876 |
| 161321_i_at | 0.377 | 0.858 | 0.886 | 0.892 | 0.913 |
| 161322_r_at | 0.405 | 0.896 | 0.875 | 0.885 | 0.873 |
| 161323_f_at | 0.226 | 0.896 | 0.936 | 0.943 | 0.942 |
| 161324_r_at | 0.298 | 0.848 | 0.773 | 0.891 | 0.875 |
| 161325_at   | 0.264 | 0.928 | 0.854 | 0.997 | 0.921 |
| 161326_f_at | 0.441 | 0.793 | 0.788 | 0.824 | 0.833 |
| 161327_f_at | 0.175 | 1.167 | 1.269 | 1.056 | 1.279 |
| 161328_i_at | 0.474 | 0.801 | 0.814 | 0.876 | 0.789 |
| 161329_f_at | 0.280 | 1.050 | 1.122 | 0.989 | 1.156 |
| 161330_r_at | 0.495 | 0.826 | 0.754 | 0.835 | 0.760 |
| 161331_r_at | 0.363 | 0.795 | 0.715 | 0.797 | 0.780 |
| 161332_f_at | 0.314 | 0.927 | 0.964 | 0.943 | 0.894 |
| 161333_f_at | 0.291 | 0.889 | 0.791 | 0.884 | 0.887 |
| 161334_r_at | 0.443 | 0.868 | 0.847 | 0.857 | 0.880 |
| 161335_r_at | 0.375 | 0.933 | 0.944 | 0.948 | 0.952 |
| 161336_r_at | 0.472 | 0.816 | 0.737 | 0.847 | 0.771 |
| 161337_f_at | 0.494 | 0.955 | 0.932 | 0.947 | 0.947 |
| 161338_i_at | 0.384 | 1.007 | 0.998 | 1.092 | 0.954 |
| 161339_f_at | 0.430 | 0.943 | 0.956 | 1.015 | 0.950 |
| 161340_r_at | 0.375 | 0.846 | 0.832 | 0.918 | 0.799 |
| 161341_f_at | 0.377 | 0.974 | 0.937 | 0.974 | 1.005 |
| 161342_r_at | 0.191 | 1.167 | 1.206 | 1.059 | 1.328 |
| 161343_r_at | 0.413 | 0.932 | 0.887 | 0.905 | 0.883 |
| 161344_r_at | 0.411 | 0.891 | 0.865 | 0.954 | 0.897 |
| 161345_f_at | 0.128 | 0.989 | 1.049 | 0.900 | 0.990 |
| 161346_f_at | 0.458 | 0.819 | 0.761 | 0.862 | 0.795 |
| 161347_r_at | 0.290 | 0.856 | 0.778 | 0.909 | 0.900 |
| 161348_r_at | 0.328 | 0.939 | 0.923 | 1.030 | 0.974 |
| 161349_f_at | 0.343 | 0.999 | 1.027 | 0.940 | 1.009 |
| 161350_f_at | 0.347 | 0.936 | 0.959 | 0.977 | 0.963 |
| 161351_r_at | 0.257 | 0.946 | 0.882 | 0.947 | 0.902 |
| 161352_r_at | 0.486 | 0.791 | 0.773 | 0.837 | 0.742 |
| 161353_r_at | 0.313 | 1.024 | 1.029 | 0.992 | 0.960 |
| 161354_f_at | 0.137 | 1.053 | 0.958 | 1.066 | 1.011 |
| 161355_f_at | 0.232 | 0.976 | 0.917 | 0.990 | 0.983 |

|             |       |       |       |       |       |
|-------------|-------|-------|-------|-------|-------|
| 161356_at   | 0.438 | 0.913 | 0.879 | 0.965 | 0.871 |
| 161357_r_at | 0.407 | 0.877 | 0.884 | 0.945 | 0.914 |
| 161358_r_at | 0.174 | 0.841 | 0.806 | 0.963 | 0.865 |
| 161359_s_at | 0.178 | 1.238 | 1.163 | 1.072 | 1.177 |
| 161360_at   | 0.402 | 0.993 | 1.019 | 0.993 | 1.036 |
| 161361_s_at | 0.218 | 1.109 | 1.060 | 1.050 | 0.973 |
| 161362_at   | 0.362 | 0.857 | 0.804 | 0.863 | 0.804 |
| 161363_r_at | 0.342 | 0.878 | 0.821 | 0.938 | 0.865 |
| 161364_f_at | 0.174 | 1.047 | 0.964 | 0.970 | 0.946 |
| 161365_r_at | 0.261 | 0.912 | 0.845 | 0.957 | 0.950 |
| 161366_r_at | 0.323 | 0.753 | 0.785 | 0.812 | 0.670 |
| 161367_f_at | 0.275 | 0.828 | 0.789 | 0.907 | 0.877 |
| 161368_r_at | 0.293 | 0.995 | 0.942 | 0.948 | 0.966 |
| 161369_r_at | 0.406 | 0.960 | 0.897 | 0.951 | 0.953 |
| 161370_f_at | 0.258 | 0.916 | 0.813 | 0.937 | 0.915 |
| 161371_r_at | 0.220 | 0.953 | 0.889 | 0.891 | 0.855 |
| 161372_f_at | 0.463 | 1.024 | 1.028 | 1.048 | 1.024 |
| 161373_r_at | 0.415 | 0.830 | 0.807 | 0.839 | 0.738 |
| 161374_f_at | 0.293 | 0.954 | 0.916 | 1.015 | 0.986 |
| 161375_at   | 0.273 | 0.875 | 0.833 | 0.902 | 0.873 |
| 161376_f_at | 0.228 | 0.881 | 0.880 | 0.946 | 0.951 |
| 161377_at   | 0.258 | 0.939 | 0.943 | 1.041 | 0.984 |
| 161378_r_at | 0.230 | 0.873 | 0.853 | 0.953 | 0.907 |
| 161379_at   | 0.454 | 0.889 | 0.911 | 0.938 | 0.917 |
| 161380_f_at | 0.236 | 1.022 | 0.959 | 0.921 | 1.002 |
| 161381_r_at | 0.327 | 0.887 | 0.907 | 0.966 | 0.885 |
| 161382_at   | 0.472 | 0.807 | 0.831 | 0.891 | 0.800 |
| 161383_r_at | 0.188 | 0.972 | 0.983 | 1.062 | 0.876 |
| 161384_r_at | 0.452 | 0.878 | 0.833 | 0.874 | 0.878 |
| 161385_r_at | 0.379 | 0.977 | 0.914 | 0.956 | 0.933 |
| 161386_f_at | 0.323 | 1.018 | 1.069 | 1.052 | 1.028 |
| 161387_i_at | 0.380 | 1.054 | 0.961 | 1.039 | 0.990 |
| 161388_f_at | 0.378 | 0.974 | 0.958 | 1.017 | 1.011 |
| 161389_f_at | 0.490 | 1.039 | 1.054 | 1.058 | 1.055 |
| 161390_r_at | 0.229 | 0.818 | 0.752 | 0.930 | 0.796 |
| 161391_r_at | 0.231 | 0.931 | 0.879 | 0.944 | 0.901 |
| 161392_f_at | 0.136 | 1.119 | 0.951 | 1.024 | 1.030 |
| 161393_at   | 0.336 | 0.919 | 0.977 | 1.028 | 0.979 |
| 161394_f_at | 0.409 | 0.876 | 0.872 | 0.962 | 0.878 |
| 161395_i_at | 0.444 | 0.963 | 0.921 | 0.967 | 0.911 |
| 161396_f_at | 0.163 | 1.157 | 1.003 | 1.007 | 1.259 |
| 161397_r_at | 0.278 | 0.903 | 0.810 | 0.957 | 0.845 |
| 161398_at   | 0.444 | 0.935 | 0.900 | 0.915 | 0.897 |
| 161399_r_at | 0.337 | 0.914 | 0.879 | 0.991 | 0.926 |
| 161400_f_at | 0.063 | 1.128 | 1.161 | 0.961 | 1.082 |
| 161401_f_at | 0.397 | 1.066 | 1.030 | 0.985 | 1.065 |
| 161402_r_at | 0.505 | 0.951 | 0.930 | 0.941 | 0.924 |

|             |       |       |       |       |       |
|-------------|-------|-------|-------|-------|-------|
| 161403_r_at | 0.302 | 0.941 | 0.936 | 0.993 | 0.914 |
| 161404_at   | 0.440 | 0.865 | 0.835 | 0.877 | 0.873 |
| 161405_r_at | 0.246 | 0.789 | 0.731 | 0.874 | 0.756 |
| 161406_at   | 0.348 | 0.897 | 0.904 | 0.999 | 0.921 |
| 161407_i_at | 0.399 | 0.852 | 0.784 | 0.887 | 0.841 |
| 161408_r_at | 0.470 | 0.908 | 0.850 | 0.921 | 0.800 |
| 161409_f_at | 0.270 | 0.891 | 0.846 | 0.929 | 0.898 |
| 161410_r_at | 0.291 | 1.086 | 1.096 | 0.988 | 1.092 |
| 161411_i_at | 0.221 | 0.947 | 0.815 | 0.947 | 0.878 |
| 161412_r_at | 0.474 | 0.984 | 0.970 | 0.974 | 0.958 |
| 161413_f_at | 0.331 | 0.975 | 0.936 | 1.003 | 0.934 |
| 161414_f_at | 0.483 | 0.942 | 0.899 | 0.941 | 0.907 |
| 161415_r_at | 0.158 | 0.950 | 0.863 | 0.899 | 0.937 |
| 161416_r_at | 0.360 | 0.984 | 0.959 | 1.011 | 0.992 |
| 161417_r_at | 0.272 | 0.926 | 0.903 | 0.996 | 0.952 |
| 161418_r_at | 0.349 | 0.884 | 0.821 | 0.915 | 0.898 |
| 161419_r_at | 0.427 | 0.819 | 0.830 | 0.917 | 0.820 |
| 161420_r_at | 0.337 | 0.927 | 0.928 | 0.925 | 0.952 |
| 161421_r_at | 0.361 | 0.896 | 0.858 | 0.942 | 0.886 |
| 161422_f_at | 0.250 | 1.054 | 0.982 | 1.563 | 0.915 |
| 161423_r_at | 0.186 | 0.877 | 0.781 | 0.921 | 0.858 |
| 161424_f_at | 0.355 | 0.871 | 0.829 | 0.931 | 0.868 |
| 161425_r_at | 0.298 | 0.843 | 0.781 | 0.892 | 0.846 |
| 161426_at   | 0.259 | 0.862 | 0.783 | 0.927 | 0.888 |
| 161427_f_at | 0.416 | 0.952 | 0.955 | 0.939 | 0.911 |
| 161428_at   | 0.375 | 0.855 | 0.800 | 0.933 | 0.861 |
| 161429_at   | 0.145 | 0.906 | 0.827 | 0.997 | 0.902 |
| 161430_at   | 0.388 | 1.004 | 0.922 | 0.982 | 0.921 |
| 161431_i_at | 0.477 | 0.735 | 0.654 | 0.759 | 0.676 |
| 161432_f_at | 0.386 | 1.005 | 0.973 | 0.950 | 1.015 |
| 161433_f_at | 0.261 | 1.289 | 1.194 | 1.070 | 1.109 |
| 161434_r_at | 0.346 | 0.846 | 0.781 | 0.914 | 0.827 |
| 161435_i_at | 0.340 | 0.954 | 0.929 | 1.015 | 0.904 |
| 161436_s_at | 0.136 | 1.532 | 1.205 | 1.104 | 1.400 |
| 161437_f_at | 0.403 | 0.982 | 0.932 | 0.956 | 0.974 |
| 161438_r_at | 0.474 | 0.943 | 0.959 | 0.964 | 0.937 |
| 161439_f_at | 0.323 | 0.949 | 0.929 | 0.980 | 0.914 |
| 161440_r_at | 0.162 | 0.953 | 0.943 | 0.882 | 0.852 |
| 161441_f_at | 0.256 | 0.902 | 0.885 | 0.963 | 0.970 |
| 161442_at   | 0.393 | 0.828 | 0.850 | 0.918 | 0.839 |
| 161443_r_at | 0.291 | 1.023 | 1.010 | 1.014 | 0.979 |
| 161444_f_at | 0.386 | 1.034 | 1.050 | 0.975 | 1.008 |
| 161445_at   | 0.124 | 0.952 | 0.870 | 0.906 | 0.925 |
| 161446_r_at | 0.355 | 0.924 | 0.815 | 0.937 | 0.912 |
| 161447_f_at | 0.441 | 1.010 | 0.982 | 1.037 | 1.003 |
| 161448_f_at | 0.478 | 0.920 | 0.905 | 0.905 | 0.883 |
| 161449_f_at | 0.415 | 1.057 | 0.996 | 1.026 | 1.035 |



|             |       |       |       |       |       |
|-------------|-------|-------|-------|-------|-------|
| 161450_r_at | 0.484 | 0.961 | 0.923 | 0.958 | 0.928 |
| 161451_r_at | 0.438 | 0.924 | 0.919 | 0.953 | 0.949 |
| 161452_f_at | 0.328 | 0.940 | 0.962 | 0.981 | 0.914 |
| 161453_r_at | 0.351 | 1.012 | 1.046 | 1.054 | 1.012 |
| 161454_r_at | 0.202 | 0.863 | 0.828 | 1.011 | 0.856 |
| 161455_r_at | 0.272 | 0.837 | 0.852 | 0.971 | 0.826 |
| 161456_f_at | 0.467 | 0.879 | 0.891 | 0.936 | 0.880 |
| 161457_at   | 0.478 | 0.838 | 0.829 | 0.865 | 0.847 |
| 161458_at   | 0.441 | 0.914 | 0.878 | 0.888 | 0.873 |
| 161459_f_at | 0.417 | 1.044 | 1.015 | 1.018 | 1.008 |
| 161460_r_at | 0.326 | 0.925 | 0.900 | 1.009 | 0.905 |
| 161461_at   | 0.353 | 0.880 | 0.892 | 0.990 | 0.911 |
| 161462_r_at | 0.419 | 0.881 | 0.860 | 0.880 | 0.905 |
| 161463_f_at | 0.246 | 0.931 | 0.849 | 0.896 | 0.919 |
| 161464_f_at | 0.441 | 1.047 | 1.063 | 1.048 | 1.067 |
| 161465_r_at | 0.280 | 0.866 | 0.762 | 0.879 | 0.784 |
| 161466_r_at | 0.456 | 0.991 | 0.965 | 1.016 | 0.992 |
| 161467_f_at | 0.245 | 1.054 | 1.073 | 1.131 | 0.997 |
| 161468_f_at | 0.434 | 0.924 | 0.902 | 0.978 | 0.925 |
| 161469_r_at | 0.326 | 0.912 | 0.848 | 0.993 | 0.874 |
| 161470_r_at | 0.335 | 0.940 | 0.880 | 0.935 | 0.886 |
| 161471_f_at | 0.218 | 1.086 | 1.005 | 1.037 | 1.064 |
| 161472_r_at | 0.347 | 0.785 | 0.808 | 0.853 | 0.730 |
| 161473_f_at | 0.261 | 1.033 | 0.922 | 0.960 | 0.991 |
| 161474_r_at | 0.164 | 0.786 | 0.758 | 0.919 | 0.755 |
| 161475_f_at | 0.410 | 0.936 | 0.954 | 0.970 | 0.960 |
| 161476_at   | 0.174 | 1.008 | 0.964 | 0.948 | 1.027 |
| 161477_r_at | 0.266 | 0.912 | 0.795 | 0.893 | 0.852 |
| 161478_at   | 0.307 | 0.941 | 0.811 | 0.930 | 0.883 |
| 161479_f_at | 0.269 | 0.828 | 0.859 | 0.914 | 0.926 |
| 161480_i_at | 0.188 | 1.056 | 0.997 | 0.973 | 0.992 |
| 161481_f_at | 0.267 | 0.953 | 0.942 | 0.914 | 0.903 |
| 161482_f_at | 0.363 | 0.825 | 0.826 | 0.896 | 0.755 |
| 161483_r_at | 0.443 | 0.948 | 0.904 | 0.939 | 0.939 |
| 161484_r_at | 0.188 | 0.889 | 0.876 | 1.071 | 0.809 |
| 161485_r_at | 0.481 | 0.883 | 0.886 | 0.885 | 0.864 |
| 161486_f_at | 0.246 | 1.002 | 1.074 | 0.949 | 0.910 |
| 161487_f_at | 0.429 | 1.004 | 1.043 | 1.020 | 1.040 |
| 161488_r_at | 0.497 | 0.831 | 0.809 | 0.831 | 0.827 |
| 161489_r_at | 0.220 | 0.854 | 0.821 | 0.921 | 0.778 |
| 161490_at   | 0.402 | 0.907 | 0.903 | 0.953 | 0.888 |
| 161491_r_at | 0.270 | 0.800 | 0.967 | 0.860 | 0.811 |
| 161492_i_at | 0.274 | 0.853 | 0.792 | 0.903 | 0.876 |
| 161493_at   | 0.415 | 0.909 | 0.898 | 0.951 | 0.915 |
| 161494_f_at | 0.470 | 0.958 | 0.948 | 0.977 | 0.925 |
| 161495_r_at | 0.436 | 0.846 | 0.788 | 0.910 | 0.820 |
| 161496_r_at | 0.449 | 0.847 | 0.834 | 0.918 | 0.843 |

|             |       |       |       |       |       |
|-------------|-------|-------|-------|-------|-------|
| 161497_f_at | 0.345 | 0.958 | 0.894 | 1.008 | 0.946 |
| 161498_at   | 0.290 | 0.996 | 0.985 | 0.973 | 1.040 |
| 161499_f_at | 0.438 | 1.027 | 1.060 | 0.996 | 1.071 |
| 161500_i_at | 0.388 | 0.804 | 0.753 | 0.877 | 0.827 |
| 161501_at   | 0.458 | 0.802 | 0.815 | 0.858 | 0.798 |
| 161502_r_at | 0.186 | 0.879 | 0.759 | 0.942 | 0.875 |
| 161503_f_at | 0.396 | 1.027 | 1.008 | 0.980 | 0.986 |
| 161504_i_at | 0.343 | 0.856 | 0.768 | 0.941 | 0.859 |
| 161505_i_at | 0.342 | 0.856 | 0.775 | 0.872 | 0.789 |
| 161506_r_at | 0.167 | 0.856 | 0.757 | 0.943 | 0.828 |
| 161507_f_at | 0.404 | 1.012 | 0.909 | 0.990 | 0.948 |
| 161508_at   | 0.420 | 0.843 | 0.766 | 0.871 | 0.832 |
| 161509_at   | 0.206 | 0.993 | 0.916 | 1.017 | 0.970 |
| 161510_f_at | 0.179 | 0.981 | 0.887 | 1.011 | 0.936 |
| 161511_f_at | 0.175 | 1.153 | 1.245 | 0.998 | 1.196 |
| 161512_r_at | 0.328 | 0.849 | 0.840 | 0.957 | 0.867 |
| 161513_r_at | 0.438 | 0.926 | 0.974 | 0.953 | 0.917 |
| 161514_at   | 0.388 | 1.019 | 1.001 | 0.962 | 1.036 |
| 161515_i_at | 0.480 | 0.892 | 0.849 | 0.904 | 0.888 |
| 161516_r_at | 0.496 | 1.020 | 1.051 | 1.026 | 1.029 |
| 161517_at   | 0.351 | 1.026 | 0.960 | 1.004 | 0.957 |
| 161518_r_at | 0.440 | 0.937 | 0.865 | 0.928 | 0.892 |
| 161519_f_at | 0.035 | 0.919 | 0.843 | 1.057 | 0.892 |
| 161520_at   | 0.461 | 0.923 | 0.905 | 0.971 | 0.914 |
| 161521_at   | 0.422 | 0.947 | 0.917 | 0.916 | 0.899 |
| 161522_i_at | 0.319 | 1.096 | 1.021 | 1.023 | 1.074 |
| 161523_r_at | 0.463 | 0.883 | 0.842 | 0.866 | 0.859 |
| 161524_r_at | 0.327 | 0.921 | 0.847 | 0.963 | 0.957 |
| 161525_f_at | 0.477 | 1.071 | 1.048 | 1.065 | 1.058 |
| 161526_r_at | 0.322 | 0.920 | 0.905 | 0.966 | 0.890 |
| 161527_r_at | 0.332 | 0.973 | 0.934 | 0.970 | 0.918 |
| 161528_r_at | 0.484 | 0.910 | 0.877 | 0.931 | 0.899 |
| 161529_r_at | 0.399 | 0.864 | 0.797 | 0.892 | 0.846 |
| 161530_r_at | 0.184 | 0.991 | 0.902 | 1.103 | 0.981 |
| 161531_r_at | 0.355 | 0.948 | 0.965 | 0.975 | 0.940 |
| 161532_f_at | 0.351 | 1.003 | 0.918 | 0.972 | 0.945 |
| 161533_at   | 0.505 | 0.915 | 0.907 | 0.946 | 0.880 |
| 161534_f_at | 0.338 | 0.866 | 0.870 | 0.932 | 0.889 |
| 161535_at   | 0.340 | 0.870 | 0.797 | 0.922 | 0.874 |
| 161536_r_at | 0.343 | 0.944 | 0.926 | 0.950 | 0.999 |
| 161537_f_at | 0.035 | 1.025 | 0.936 | 1.018 | 1.063 |
| 161538_r_at | 0.323 | 0.963 | 0.952 | 0.942 | 0.885 |
| 161539_f_at | 0.165 | 1.061 | 0.948 | 0.988 | 0.948 |
| 161540_r_at | 0.331 | 0.960 | 0.970 | 1.002 | 0.928 |
| 161541_r_at | 0.234 | 0.881 | 0.883 | 0.991 | 0.919 |
| 161542_r_at | 0.271 | 0.901 | 0.858 | 0.939 | 0.883 |
| 161543_at   | 0.329 | 0.805 | 0.782 | 0.887 | 0.815 |

|             |       |       |       |       |       |
|-------------|-------|-------|-------|-------|-------|
| 161544_r_at | 0.474 | 0.950 | 0.944 | 0.949 | 0.959 |
| 161545_r_at | 0.348 | 0.864 | 0.868 | 0.927 | 0.865 |
| 161546_r_at | 0.314 | 0.884 | 0.843 | 0.949 | 0.856 |
| 161547_f_at | 0.492 | 0.837 | 0.806 | 0.868 | 0.827 |
| 161548_r_at | 0.175 | 0.903 | 0.809 | 0.964 | 0.924 |
| 161549_f_at | 0.330 | 0.929 | 0.881 | 0.952 | 0.941 |
| 161550_r_at | 0.494 | 0.940 | 0.933 | 0.943 | 0.916 |
| 161551_f_at | 0.320 | 1.112 | 1.007 | 1.038 | 1.089 |
| 161552_i_at | 0.509 | 1.003 | 0.994 | 1.005 | 0.989 |
| 161553_i_at | 0.303 | 0.877 | 0.901 | 0.960 | 0.859 |
| 161554_r_at | 0.320 | 0.876 | 0.841 | 0.936 | 0.905 |
| 161555_f_at | 0.345 | 0.907 | 0.863 | 0.965 | 0.873 |
| 161556_at   | 0.367 | 0.922 | 0.895 | 0.937 | 0.956 |
| 161557_at   | 0.290 | 0.942 | 0.903 | 1.020 | 0.910 |
| 161558_f_at | 0.396 | 0.948 | 0.901 | 0.952 | 0.950 |
| 161559_i_at | 0.320 | 0.918 | 0.879 | 0.976 | 0.962 |
| 161560_f_at | 0.390 | 0.866 | 0.845 | 0.931 | 0.836 |
| 161561_r_at | 0.408 | 0.845 | 0.898 | 0.910 | 0.884 |
| 161562_f_at | 0.284 | 0.949 | 0.907 | 0.968 | 0.951 |
| 161563_r_at | 0.220 | 0.811 | 0.870 | 0.923 | 0.813 |
| 161564_r_at | 0.271 | 0.917 | 0.944 | 0.936 | 0.850 |
| 161565_r_at | 0.337 | 0.895 | 0.859 | 0.924 | 0.924 |
| 161566_r_at | 0.445 | 0.956 | 0.927 | 0.987 | 0.955 |
| 161567_r_at | 0.397 | 0.928 | 0.949 | 0.975 | 0.932 |
| 161568_f_at | 0.441 | 0.865 | 0.884 | 0.918 | 0.876 |
| 161569_f_at | 0.307 | 0.986 | 0.810 | 1.296 | 0.820 |
| 161570_r_at | 0.440 | 0.997 | 1.018 | 1.005 | 1.008 |
| 161571_f_at | 0.468 | 1.058 | 1.079 | 1.054 | 1.130 |
| 161572_r_at | 0.279 | 0.842 | 0.785 | 0.896 | 0.808 |
| 161573_at   | 0.298 | 0.909 | 0.877 | 0.956 | 0.929 |
| 161574_r_at | 0.386 | 0.984 | 0.942 | 0.924 | 0.937 |
| 161575_f_at | 0.388 | 0.932 | 0.891 | 0.994 | 0.933 |
| 161576_f_at | 0.269 | 0.944 | 0.863 | 1.008 | 0.938 |
| 161577_f_at | 0.216 | 0.928 | 0.881 | 0.948 | 0.923 |
| 161578_r_at | 0.125 | 0.873 | 0.745 | 1.014 | 0.917 |
| 161579_r_at | 0.475 | 0.835 | 0.806 | 0.858 | 0.763 |
| 161580_f_at | 0.341 | 0.937 | 0.870 | 0.949 | 0.906 |
| 161581_r_at | 0.327 | 0.879 | 0.847 | 0.942 | 0.865 |
| 161582_r_at | 0.315 | 0.928 | 0.968 | 0.927 | 0.910 |
| 161583_at   | 0.272 | 0.970 | 0.996 | 1.041 | 0.988 |
| 161584_r_at | 0.408 | 0.961 | 0.951 | 0.950 | 0.958 |
| 161585_at   | 0.495 | 0.853 | 0.859 | 0.884 | 0.845 |
| 161586_f_at | 0.470 | 0.924 | 0.905 | 0.913 | 0.911 |
| 161587_at   | 0.320 | 0.976 | 0.981 | 1.002 | 0.963 |
| 161588_r_at | 0.505 | 0.793 | 0.747 | 0.836 | 0.726 |
| 161589_at   | 0.467 | 0.869 | 0.872 | 0.872 | 0.850 |
| 161590_r_at | 0.299 | 0.964 | 0.991 | 0.949 | 0.975 |

|             |       |       |       |       |       |
|-------------|-------|-------|-------|-------|-------|
| 161591_r_at | 0.318 | 0.821 | 0.832 | 0.942 | 0.880 |
| 161592_at   | 0.465 | 0.933 | 0.923 | 0.958 | 0.902 |
| 161593_r_at | 0.390 | 0.914 | 0.982 | 0.970 | 0.956 |
| 161594_f_at | 0.196 | 0.966 | 0.910 | 0.962 | 0.968 |
| 161595_at   | 0.216 | 0.944 | 0.985 | 1.079 | 0.893 |
| 161596_f_at | 0.386 | 0.860 | 0.855 | 0.940 | 0.943 |
| 161597_r_at | 0.263 | 0.962 | 1.031 | 0.957 | 0.898 |
| 161598_at   | 0.459 | 0.918 | 0.921 | 0.958 | 0.914 |
| 161599_i_at | 0.413 | 0.827 | 0.695 | 0.854 | 0.783 |
| 161600_r_at | 0.332 | 0.921 | 0.720 | 0.928 | 0.862 |
| 161601_i_at | 0.444 | 0.771 | 0.772 | 0.800 | 0.672 |
| 161602_at   | 0.363 | 1.064 | 1.015 | 1.020 | 1.037 |
| 161603_r_at | 0.411 | 0.835 | 0.820 | 0.894 | 0.785 |
| 161604_r_at | 0.406 | 0.938 | 0.972 | 0.971 | 0.937 |
| 161605_f_at | 0.429 | 1.037 | 1.004 | 1.039 | 1.012 |
| 161606_f_at | 0.392 | 0.899 | 0.856 | 0.957 | 0.883 |
| 161607_r_at | 0.254 | 0.934 | 0.944 | 0.941 | 0.899 |
| 161608_r_at | 0.265 | 0.983 | 0.951 | 0.925 | 0.891 |
| 161609_at   | 0.398 | 0.934 | 0.860 | 0.990 | 0.900 |
| 161610_at   | 0.223 | 1.188 | 1.010 | 1.192 | 1.059 |
| 161611_f_at | 0.357 | 0.839 | 0.804 | 0.893 | 0.859 |
| 161612_f_at | 0.402 | 0.845 | 0.822 | 0.901 | 0.797 |
| 161613_at   | 0.205 | 0.997 | 0.930 | 0.951 | 1.041 |
| 161614_r_at | 0.353 | 0.865 | 0.842 | 0.963 | 0.801 |
| 161615_f_at | 0.339 | 0.959 | 0.888 | 0.920 | 0.923 |
| 161616_f_at | 0.026 | 1.023 | 1.050 | 0.977 | 1.115 |
| 161617_f_at | 0.294 | 1.030 | 1.032 | 1.004 | 1.068 |
| 161618_r_at | 0.212 | 0.832 | 0.765 | 0.947 | 0.842 |
| 161619_f_at | 0.323 | 0.921 | 0.954 | 1.025 | 0.919 |
| 161620_f_at | 0.038 | 0.933 | 0.799 | 0.982 | 0.963 |
| 161621_r_at | 0.301 | 0.875 | 0.828 | 0.971 | 0.814 |
| 161622_f_at | 0.226 | 0.922 | 0.913 | 0.921 | 0.969 |
| 161623_at   | 0.477 | 0.997 | 0.996 | 1.036 | 0.989 |
| 161624_r_at | 0.093 | 1.015 | 0.915 | 0.969 | 0.931 |
| 161625_r_at | 0.411 | 0.909 | 0.902 | 0.926 | 0.843 |
| 161626_f_at | 0.120 | 0.820 | 0.731 | 0.966 | 0.750 |
| 161627_r_at | 0.456 | 0.951 | 0.921 | 0.981 | 0.922 |
| 161628_r_at | 0.427 | 0.825 | 0.749 | 0.863 | 0.823 |
| 161629_i_at | 0.235 | 1.016 | 0.946 | 1.060 | 0.967 |
| 161630_i_at | 0.216 | 0.831 | 0.790 | 0.962 | 0.850 |
| 161631_f_at | 0.468 | 0.889 | 0.877 | 0.916 | 0.852 |
| 161632_r_at | 0.227 | 0.945 | 0.907 | 1.023 | 0.951 |
| 161633_r_at | 0.394 | 0.851 | 0.794 | 0.911 | 0.835 |
| 161634_r_at | 0.505 | 0.857 | 0.817 | 0.897 | 0.826 |
| 161635_f_at | 0.397 | 0.993 | 0.922 | 0.968 | 0.956 |
| 161636_r_at | 0.231 | 0.930 | 0.882 | 0.995 | 0.917 |
| 161637_f_at | 0.377 | 0.882 | 0.932 | 0.958 | 0.868 |

|             |       |       |       |       |       |
|-------------|-------|-------|-------|-------|-------|
| 161638_f_at | 0.475 | 0.901 | 0.870 | 0.941 | 0.875 |
| 161639_f_at | 0.337 | 0.726 | 0.703 | 0.815 | 0.810 |
| 161640_at   | 0.251 | 0.906 | 0.865 | 0.990 | 0.891 |
| 161641_at   | 0.350 | 0.922 | 0.854 | 0.940 | 0.879 |
| 161642_f_at | 0.389 | 1.060 | 1.078 | 1.120 | 1.045 |
| 161643_i_at | 0.434 | 0.977 | 0.926 | 0.988 | 0.970 |
| 161644_f_at | 0.188 | 0.928 | 0.843 | 1.004 | 0.918 |
| 161645_r_at | 0.386 | 0.768 | 0.743 | 0.862 | 0.770 |
| 161646_r_at | 0.427 | 0.971 | 0.969 | 0.975 | 0.976 |
| 161647_f_at | 0.329 | 0.862 | 0.806 | 0.976 | 0.875 |
| 161648_at   | 0.411 | 1.014 | 1.002 | 0.966 | 1.012 |
| 161649_f_at | 0.300 | 0.867 | 0.829 | 0.922 | 0.850 |
| 161650_at   | 0.147 | 1.021 | 1.239 | 1.044 | 0.993 |
| 161651_f_at | 0.223 | 0.979 | 0.942 | 0.966 | 0.983 |
| 161652_r_at | 0.505 | 1.005 | 1.009 | 1.019 | 1.006 |
| 161653_f_at | 0.436 | 0.916 | 0.896 | 0.936 | 0.891 |
| 161654_r_at | 0.422 | 0.856 | 0.891 | 0.955 | 0.835 |
| 161655_at   | 0.226 | 0.958 | 1.044 | 0.903 | 0.947 |
| 161656_r_at | 0.478 | 0.797 | 0.745 | 0.847 | 0.797 |
| 161657_f_at | 0.072 | 0.974 | 0.952 | 0.904 | 0.943 |
| 161658_at   | 0.084 | 1.016 | 0.906 | 0.987 | 0.853 |
| 161659_f_at | 0.207 | 0.942 | 0.888 | 1.020 | 0.956 |
| 161660_r_at | 0.456 | 1.022 | 1.060 | 1.020 | 1.019 |
| 161661_i_at | 0.461 | 0.763 | 0.790 | 0.799 | 0.740 |
| 161662_f_at | 0.395 | 0.914 | 0.873 | 0.972 | 0.909 |
| 161663_f_at | 0.384 | 0.926 | 0.904 | 0.959 | 0.941 |
| 161664_at   | 0.389 | 0.873 | 0.884 | 0.883 | 0.819 |
| 161665_at   | 0.145 | 0.985 | 0.950 | 0.924 | 0.921 |
| 161666_f_at | 0.285 | 0.962 | 0.887 | 0.845 | 0.928 |
| 161667_r_at | 0.434 | 1.001 | 0.949 | 0.968 | 0.958 |
| 161668_f_at | 0.297 | 1.039 | 0.939 | 1.007 | 0.922 |
| 161669_r_at | 0.477 | 0.958 | 0.980 | 0.965 | 0.945 |
| 161670_f_at | 0.374 | 0.950 | 0.914 | 1.028 | 0.919 |
| 161671_at   | 0.361 | 0.992 | 0.952 | 0.961 | 0.983 |
| 161672_at   | 0.350 | 0.938 | 0.887 | 0.902 | 0.921 |
| 161673_r_at | 0.484 | 0.902 | 0.894 | 0.906 | 0.865 |
| 161674_i_at | 0.384 | 0.880 | 0.808 | 0.901 | 0.852 |
| 161675_f_at | 0.301 | 0.933 | 0.886 | 1.018 | 0.904 |
| 161676_at   | 0.383 | 0.885 | 0.859 | 0.943 | 0.914 |
| 161677_r_at | 0.362 | 0.818 | 0.788 | 0.888 | 0.761 |
| 161678_at   | 0.279 | 0.895 | 0.805 | 0.925 | 0.886 |
| 161679_r_at | 0.255 | 0.922 | 0.907 | 0.915 | 0.946 |
| 161680_r_at | 0.284 | 0.933 | 0.895 | 1.026 | 0.857 |
| 161681_i_at | 0.241 | 0.800 | 0.729 | 0.920 | 0.807 |
| 161682_f_at | 0.421 | 0.900 | 0.858 | 0.927 | 0.845 |
| 161683_r_at | 0.281 | 0.916 | 0.837 | 0.978 | 0.947 |
| 161684_r_at | 0.433 | 0.906 | 0.901 | 0.964 | 0.962 |

|             |       |       |       |       |       |
|-------------|-------|-------|-------|-------|-------|
| 161685_r_at | 0.383 | 0.968 | 0.916 | 0.942 | 0.928 |
| 161686_i_at | 0.344 | 0.973 | 0.927 | 0.966 | 0.916 |
| 161687_r_at | 0.214 | 0.827 | 0.859 | 1.038 | 0.789 |
| 161688_r_at | 0.306 | 0.826 | 0.813 | 0.932 | 0.817 |
| 161689_f_at | 0.075 | 0.874 | 1.035 | 0.942 | 0.956 |
| 161690_at   | 0.305 | 0.918 | 0.907 | 0.896 | 0.915 |
| 161691_at   | 0.339 | 0.852 | 0.809 | 0.863 | 0.817 |
| 161692_r_at | 0.360 | 0.897 | 0.865 | 0.953 | 0.864 |
| 161693_r_at | 0.505 | 0.839 | 0.825 | 0.858 | 0.796 |
| 161694_f_at | 0.265 | 1.012 | 1.009 | 1.025 | 1.058 |
| 161695_f_at | 0.240 | 0.917 | 0.828 | 0.907 | 0.921 |
| 161696_f_at | 0.209 | 1.167 | 1.063 | 1.123 | 1.201 |
| 161697_r_at | 0.463 | 0.959 | 0.891 | 0.957 | 0.918 |
| 161698_f_at | 0.069 | 1.257 | 1.162 | 0.985 | 1.147 |
| 161699_i_at | 0.261 | 0.901 | 0.830 | 0.916 | 0.871 |
| 161700_i_at | 0.500 | 1.003 | 1.007 | 1.017 | 0.986 |
| 161701_at   | 0.309 | 0.921 | 0.856 | 0.980 | 0.902 |
| 161702_f_at | 0.328 | 0.998 | 0.913 | 1.045 | 0.952 |
| 161703_f_at | 0.374 | 1.198 | 1.238 | 1.085 | 1.243 |
| 161704_r_at | 0.377 | 1.023 | 0.975 | 0.984 | 0.948 |
| 161705_r_at | 0.344 | 0.953 | 0.876 | 0.991 | 0.915 |
| 161706_f_at | 0.322 | 1.079 | 1.010 | 1.069 | 1.030 |
| 161707_f_at | 0.222 | 0.911 | 0.975 | 0.946 | 0.910 |
| 161708_f_at | 0.188 | 0.939 | 0.943 | 1.028 | 0.951 |
| 161709_at   | 0.345 | 0.916 | 0.793 | 0.929 | 0.875 |
| 161710_r_at | 0.334 | 0.916 | 0.917 | 0.969 | 0.903 |
| 161711_f_at | 0.287 | 0.935 | 0.900 | 0.935 | 0.956 |
| 161712_r_at | 0.379 | 0.804 | 0.756 | 0.877 | 0.800 |
| 161713_f_at | 0.154 | 1.052 | 0.927 | 1.071 | 1.045 |
| 161714_f_at | 0.136 | 1.071 | 1.024 | 1.051 | 1.075 |
| 161715_f_at | 0.405 | 0.930 | 0.880 | 0.951 | 0.903 |
| 161716_at   | 0.264 | 1.007 | 0.870 | 0.999 | 0.985 |
| 161717_i_at | 0.322 | 0.898 | 0.904 | 0.938 | 0.827 |
| 161718_at   | 0.427 | 0.794 | 0.821 | 0.845 | 0.792 |
| 161719_f_at | 0.176 | 0.817 | 0.772 | 0.897 | 0.814 |
| 161720_r_at | 0.316 | 0.962 | 0.896 | 0.984 | 0.913 |
| 161721_f_at | 0.288 | 0.902 | 0.889 | 0.936 | 0.938 |
| 161722_f_at | 0.484 | 0.860 | 0.831 | 0.881 | 0.853 |
| 161723_at   | 0.434 | 0.987 | 1.039 | 1.018 | 1.001 |
| 161724_r_at | 0.483 | 0.956 | 0.972 | 0.997 | 0.964 |
| 161725_r_at | 0.382 | 0.954 | 0.921 | 0.981 | 0.958 |
| 161726_f_at | 0.488 | 0.841 | 0.772 | 0.865 | 0.801 |
| 161727_r_at | 0.349 | 0.967 | 1.010 | 1.015 | 0.991 |
| 161728_f_at | 0.151 | 0.901 | 0.892 | 0.974 | 0.854 |
| 161729_f_at | 0.465 | 0.811 | 0.804 | 0.865 | 0.837 |
| 161730_f_at | 0.470 | 0.963 | 0.970 | 0.976 | 0.974 |
| 161731_at   | 0.486 | 0.897 | 0.882 | 0.913 | 0.901 |

|             |       |       |       |       |       |
|-------------|-------|-------|-------|-------|-------|
| 161732_at   | 0.350 | 0.920 | 0.960 | 0.930 | 0.913 |
| 161733_at   | 0.381 | 0.985 | 0.956 | 0.973 | 0.982 |
| 161734_r_at | 0.240 | 0.797 | 0.740 | 0.892 | 0.824 |
| 161735_r_at | 0.188 | 0.839 | 0.784 | 0.843 | 0.875 |
| 161736_r_at | 0.309 | 0.881 | 0.872 | 0.954 | 0.870 |
| 161737_at   | 0.410 | 0.886 | 0.805 | 0.918 | 0.846 |
| 161738_f_at | 0.353 | 1.009 | 0.935 | 0.969 | 0.951 |
| 161739_r_at | 0.486 | 0.867 | 0.842 | 0.921 | 0.847 |
| 161740_r_at | 0.241 | 0.813 | 0.734 | 0.768 | 0.696 |
| 161741_r_at | 0.264 | 0.992 | 0.963 | 0.996 | 0.943 |
| 161742_r_at | 0.406 | 0.881 | 0.873 | 0.916 | 0.821 |
| 161743_i_at | 0.362 | 0.902 | 0.820 | 0.928 | 0.810 |
| 161744_f_at | 0.478 | 0.943 | 0.932 | 0.995 | 0.938 |
| 161745_f_at | 0.310 | 0.957 | 0.968 | 0.954 | 0.989 |
| 161746_i_at | 0.419 | 0.954 | 0.977 | 0.951 | 0.937 |
| 161747_i_at | 0.160 | 0.909 | 0.818 | 0.969 | 0.914 |
| 161748_r_at | 0.468 | 0.872 | 0.867 | 0.925 | 0.838 |
| 161749_r_at | 0.458 | 0.883 | 0.861 | 0.933 | 0.867 |
| 161750_f_at | 0.310 | 0.888 | 0.785 | 0.890 | 0.825 |
| 161751_f_at | 0.432 | 0.868 | 0.800 | 0.885 | 0.768 |
| 161752_r_at | 0.244 | 0.799 | 0.740 | 0.874 | 0.784 |
| 161753_f_at | 0.212 | 0.868 | 0.806 | 0.908 | 0.827 |
| 161754_f_at | 0.441 | 0.903 | 0.891 | 0.941 | 0.927 |
| 161755_at   | 0.379 | 0.932 | 0.892 | 0.974 | 0.940 |
| 161756_at   | 0.354 | 0.843 | 0.768 | 0.873 | 0.915 |
| 161757_f_at | 0.287 | 1.000 | 0.961 | 0.940 | 0.925 |
| 161758_r_at | 0.357 | 0.811 | 0.836 | 0.929 | 0.800 |
| 161759_r_at | 0.408 | 0.918 | 0.886 | 0.981 | 0.873 |
| 161760_s_at | 0.187 | 1.125 | 0.983 | 0.971 | 1.089 |
| 161761_r_at | 0.349 | 0.794 | 0.771 | 0.795 | 0.637 |
| 161762_at   | 0.505 | 0.810 | 0.803 | 0.836 | 0.788 |
| 161763_r_at | 0.329 | 0.806 | 0.816 | 0.889 | 0.909 |
| 161764_r_at | 0.200 | 1.002 | 1.076 | 1.043 | 1.015 |
| 161765_f_at | 0.199 | 1.020 | 1.016 | 0.939 | 1.048 |
| 161766_i_at | 0.305 | 0.833 | 0.734 | 0.859 | 0.733 |
| 161767_r_at | 0.323 | 0.957 | 0.890 | 1.052 | 0.970 |
| 161768_r_at | 0.354 | 0.866 | 0.852 | 0.918 | 0.899 |
| 161769_r_at | 0.246 | 0.889 | 0.910 | 0.984 | 0.883 |
| 161770_f_at | 0.231 | 1.077 | 0.932 | 0.969 | 0.971 |
| 161771_r_at | 0.234 | 0.884 | 0.847 | 0.953 | 0.872 |
| 161772_i_at | 0.459 | 0.898 | 0.876 | 0.944 | 0.849 |
| 161773_i_at | 0.370 | 0.786 | 0.760 | 0.900 | 0.785 |
| 161774_f_at | 0.228 | 1.252 | 1.250 | 1.078 | 1.210 |
| 161775_f_at | 0.166 | 0.922 | 0.879 | 1.003 | 0.940 |
| 161776_at   | 0.318 | 0.882 | 0.788 | 0.849 | 0.800 |
| 161777_f_at | 0.461 | 0.904 | 0.871 | 0.953 | 0.897 |
| 161778_i_at | 0.441 | 0.885 | 0.859 | 0.930 | 0.821 |

|             |       |       |       |       |       |
|-------------|-------|-------|-------|-------|-------|
| 161779_r_at | 0.483 | 0.828 | 0.849 | 0.912 | 0.799 |
| 161780_f_at | 0.394 | 0.916 | 0.934 | 0.936 | 0.886 |
| 161781_at   | 0.334 | 0.834 | 0.804 | 0.900 | 0.859 |
| 161782_r_at | 0.365 | 0.960 | 0.897 | 0.921 | 0.948 |
| 161783_at   | 0.091 | 0.872 | 0.905 | 0.891 | 0.805 |
| 161784_f_at | 0.385 | 0.943 | 0.877 | 0.948 | 0.898 |
| 161785_f_at | 0.477 | 1.017 | 0.995 | 1.057 | 1.015 |
| 161786_f_at | 0.318 | 1.000 | 0.986 | 1.008 | 1.055 |
| 161787_f_at | 0.170 | 1.015 | 0.979 | 0.977 | 1.077 |
| 161788_f_at | 0.330 | 1.050 | 1.023 | 0.959 | 1.016 |
| 161789_r_at | 0.385 | 0.824 | 0.841 | 0.843 | 0.735 |
| 161790_at   | 0.271 | 0.882 | 0.933 | 0.952 | 0.902 |
| 161791_r_at | 0.329 | 0.821 | 0.807 | 0.901 | 0.888 |
| 161792_f_at | 0.305 | 1.011 | 0.948 | 0.971 | 0.967 |
| 161793_at   | 0.474 | 0.911 | 0.888 | 0.952 | 0.900 |
| 161794_i_at | 0.263 | 0.940 | 0.894 | 0.964 | 0.954 |
| 161795_r_at | 0.458 | 0.991 | 1.009 | 1.013 | 0.977 |
| 161796_r_at | 0.278 | 0.870 | 0.817 | 0.966 | 0.914 |
| 161797_r_at | 0.355 | 0.990 | 0.874 | 0.919 | 0.950 |
| 161798_r_at | 0.317 | 0.863 | 0.864 | 1.010 | 0.849 |
| 161799_r_at | 0.389 | 0.801 | 0.807 | 0.820 | 0.671 |
| 161800_r_at | 0.410 | 0.944 | 0.933 | 1.017 | 0.952 |
| 161801_r_at | 0.364 | 1.048 | 0.978 | 0.965 | 1.013 |
| 161802_i_at | 0.381 | 0.924 | 0.937 | 0.900 | 0.975 |
| 161803_r_at | 0.292 | 0.931 | 0.845 | 1.008 | 0.865 |
| 161804_r_at | 0.238 | 1.004 | 0.944 | 0.928 | 0.995 |
| 161805_r_at | 0.459 | 0.908 | 0.892 | 0.933 | 0.905 |
| 161806_r_at | 0.403 | 0.742 | 0.743 | 0.755 | 0.638 |
| 161807_i_at | 0.305 | 0.952 | 0.950 | 1.057 | 0.946 |
| 161808_f_at | 0.209 | 0.928 | 0.959 | 0.871 | 1.006 |
| 161809_r_at | 0.441 | 0.929 | 0.896 | 0.922 | 0.920 |
| 161810_r_at | 0.391 | 0.857 | 0.857 | 0.921 | 0.845 |
| 161811_f_at | 0.303 | 0.873 | 0.835 | 0.909 | 0.862 |
| 161812_r_at | 0.377 | 0.870 | 0.813 | 0.929 | 0.877 |
| 161813_i_at | 0.292 | 0.946 | 0.900 | 0.959 | 0.901 |
| 161814_f_at | 0.274 | 1.069 | 0.981 | 0.955 | 0.989 |
| 161815_f_at | 0.200 | 0.927 | 0.830 | 1.445 | 0.845 |
| 161816_r_at | 0.381 | 0.848 | 0.828 | 0.942 | 0.855 |
| 161817_f_at | 0.425 | 1.444 | 1.375 | 1.374 | 1.476 |
| 161818_f_at | 0.470 | 1.047 | 1.000 | 1.081 | 1.048 |
| 161819_f_at | 0.162 | 1.211 | 1.326 | 1.042 | 1.445 |
| 161820_f_at | 0.419 | 0.984 | 0.960 | 1.026 | 1.002 |
| 161821_f_at | 0.263 | 0.865 | 0.831 | 0.950 | 0.822 |
| 161822_at   | 0.475 | 0.917 | 0.921 | 0.939 | 0.932 |
| 161823_r_at | 0.354 | 0.819 | 0.827 | 0.922 | 0.875 |
| 161824_r_at | 0.373 | 0.893 | 0.863 | 0.972 | 0.888 |
| 161825_f_at | 0.497 | 0.976 | 0.951 | 1.016 | 0.962 |



|             |       |       |       |       |       |
|-------------|-------|-------|-------|-------|-------|
| 161826_r_at | 0.192 | 0.907 | 0.826 | 0.984 | 0.947 |
| 161827_f_at | 0.422 | 0.856 | 0.826 | 0.914 | 0.819 |
| 161828_r_at | 0.449 | 0.983 | 1.001 | 0.993 | 0.941 |
| 161829_at   | 0.407 | 0.865 | 0.813 | 0.900 | 0.872 |
| 161830_f_at | 0.452 | 0.907 | 0.909 | 0.931 | 0.921 |
| 161831_at   | 0.411 | 0.920 | 0.865 | 0.946 | 0.881 |
| 161832_r_at | 0.359 | 0.958 | 0.991 | 1.007 | 0.846 |
| 161833_r_at | 0.379 | 0.817 | 0.819 | 0.805 | 0.756 |
| 161834_at   | 0.362 | 0.819 | 0.721 | 0.825 | 0.797 |
| 161835_at   | 0.145 | 0.846 | 0.822 | 0.810 | 1.023 |
| 161836_r_at | 0.330 | 0.864 | 0.809 | 0.976 | 0.852 |
| 161837_r_at | 0.161 | 0.809 | 0.738 | 0.858 | 0.786 |
| 161838_f_at | 0.399 | 1.014 | 0.960 | 0.958 | 0.953 |
| 161839_f_at | 0.274 | 0.958 | 0.914 | 1.003 | 0.877 |
| 161840_f_at | 0.414 | 1.007 | 0.958 | 1.028 | 1.005 |
| 161841_r_at | 0.353 | 0.864 | 0.758 | 0.931 | 0.837 |
| 161842_r_at | 0.403 | 0.819 | 0.778 | 0.888 | 0.778 |
| 161843_at   | 0.490 | 0.866 | 0.858 | 0.875 | 0.830 |
| 161844_at   | 0.486 | 0.891 | 0.863 | 0.897 | 0.890 |
| 161845_at   | 0.390 | 0.891 | 0.875 | 0.957 | 0.915 |
| 161846_r_at | 0.477 | 0.875 | 0.839 | 0.889 | 0.836 |
| 161847_r_at | 0.128 | 0.910 | 0.880 | 1.006 | 0.926 |
| 161848_r_at | 0.231 | 0.983 | 0.956 | 0.979 | 0.924 |
| 161849_r_at | 0.510 | 0.777 | 0.737 | 0.828 | 0.737 |
| 161850_at   | 0.492 | 0.972 | 0.987 | 0.994 | 0.971 |
| 161851_r_at | 0.188 | 0.833 | 0.655 | 0.636 | 0.620 |
| 161852_i_at | 0.298 | 0.890 | 0.926 | 0.913 | 0.942 |
| 161853_f_at | 0.263 | 0.904 | 0.987 | 0.926 | 0.954 |
| 161854_f_at | 0.224 | 0.929 | 0.892 | 0.965 | 0.894 |
| 161855_at   | 0.423 | 0.888 | 0.839 | 0.893 | 0.837 |
| 161856_f_at | 0.374 | 0.869 | 0.856 | 0.938 | 0.915 |
| 161857_r_at | 0.432 | 0.867 | 0.834 | 0.863 | 0.759 |
| 161858_f_at | 0.422 | 1.104 | 1.031 | 1.060 | 1.093 |
| 161859_f_at | 0.197 | 0.967 | 0.895 | 1.042 | 0.953 |
| 161860_f_at | 0.069 | 0.991 | 1.011 | 0.927 | 1.032 |
| 161861_i_at | 0.330 | 0.791 | 0.756 | 0.807 | 0.785 |
| 161862_i_at | 0.120 | 0.974 | 1.027 | 1.046 | 0.929 |
| 161863_r_at | 0.244 | 0.974 | 1.002 | 0.978 | 0.966 |
| 161864_f_at | 0.231 | 0.998 | 0.981 | 1.010 | 1.131 |
| 161865_r_at | 0.433 | 0.836 | 0.827 | 0.953 | 0.761 |
| 161866_at   | 0.481 | 0.923 | 0.896 | 0.968 | 0.906 |
| 161867_f_at | 0.477 | 0.830 | 0.797 | 0.893 | 0.770 |
| 161868_r_at | 0.496 | 0.954 | 0.953 | 0.981 | 0.941 |
| 161869_i_at | 0.443 | 0.983 | 1.012 | 1.012 | 1.044 |
| 161870_at   | 0.244 | 0.939 | 0.882 | 0.994 | 0.964 |
| 161871_f_at | 0.449 | 0.759 | 0.746 | 0.832 | 0.701 |
| 161872_f_at | 0.445 | 0.999 | 0.996 | 0.969 | 1.031 |

|             |       |       |       |       |       |
|-------------|-------|-------|-------|-------|-------|
| 161873_r_at | 0.291 | 0.848 | 0.776 | 0.949 | 0.841 |
| 161874_r_at | 0.371 | 0.833 | 0.807 | 0.897 | 0.824 |
| 161875_at   | 0.508 | 0.856 | 0.825 | 0.869 | 0.815 |
| 161876_r_at | 0.190 | 0.949 | 1.028 | 0.979 | 0.960 |
| 161877_f_at | 0.408 | 0.879 | 0.821 | 0.922 | 0.865 |
| 161878_r_at | 0.366 | 0.871 | 0.751 | 0.828 | 0.783 |
| 161879_r_at | 0.075 | 0.962 | 0.876 | 1.011 | 0.902 |
| 161880_r_at | 0.480 | 0.980 | 0.996 | 0.980 | 0.993 |
| 161881_f_at | 0.420 | 0.930 | 0.924 | 0.919 | 0.891 |
| 161882_f_at | 0.496 | 0.936 | 0.917 | 0.941 | 0.904 |
| 161883_f_at | 0.210 | 0.951 | 0.817 | 0.942 | 0.914 |
| 161884_r_at | 0.231 | 0.925 | 0.933 | 0.977 | 0.985 |
| 161885_f_at | 0.390 | 0.873 | 0.937 | 0.912 | 0.912 |
| 161886_at   | 0.504 | 0.910 | 0.905 | 0.936 | 0.901 |
| 161887_r_at | 0.298 | 0.915 | 0.893 | 0.963 | 0.946 |
| 161888_r_at | 0.374 | 0.876 | 0.834 | 0.943 | 0.836 |
| 161889_f_at | 0.108 | 1.278 | 1.203 | 1.255 | 1.103 |
| 161890_f_at | 0.404 | 0.938 | 0.936 | 0.903 | 0.922 |
| 161891_r_at | 0.354 | 0.945 | 0.905 | 0.966 | 0.994 |
| 161892_r_at | 0.188 | 1.014 | 0.995 | 1.011 | 0.961 |
| 161893_i_at | 0.419 | 0.868 | 0.840 | 0.884 | 0.885 |
| 161894_r_at | 0.505 | 0.793 | 0.747 | 0.808 | 0.731 |
| 161895_s_at | 0.273 | 1.087 | 1.096 | 0.993 | 1.096 |
| 161896_at   | 0.500 | 0.902 | 0.884 | 0.934 | 0.884 |
| 161897_f_at | 0.421 | 0.905 | 0.853 | 0.901 | 0.907 |
| 161898_i_at | 0.059 | 0.876 | 1.303 | 0.949 | 1.094 |
| 161899_f_at | 0.128 | 0.841 | 0.890 | 0.873 | 0.748 |
| 161900_f_at | 0.238 | 1.064 | 0.885 | 1.264 | 0.921 |
| 161901_r_at | 0.312 | 0.930 | 0.876 | 0.943 | 0.915 |
| 161902_f_at | 0.323 | 0.879 | 0.795 | 0.910 | 0.850 |
| 161903_f_at | 0.348 | 1.087 | 1.028 | 1.022 | 1.009 |
| 161904_f_at | 0.145 | 0.958 | 0.866 | 0.944 | 0.925 |
| 161905_r_at | 0.432 | 0.947 | 0.930 | 0.971 | 0.931 |
| 161906_f_at | 0.226 | 0.951 | 0.853 | 0.903 | 0.928 |
| 161907_s_at | 0.110 | 1.183 | 0.801 | 1.129 | 0.937 |
| 161908_i_at | 0.253 | 0.958 | 0.856 | 0.999 | 0.978 |
| 161909_r_at | 0.136 | 0.866 | 0.799 | 0.962 | 0.846 |
| 161910_at   | 0.468 | 0.964 | 0.903 | 0.968 | 0.909 |
| 161911_f_at | 0.063 | 0.948 | 0.893 | 1.023 | 0.987 |
| 161912_r_at | 0.505 | 0.895 | 0.900 | 0.914 | 0.902 |
| 161913_r_at | 0.238 | 0.878 | 0.794 | 0.953 | 0.843 |
| 161914_s_at | 0.139 | 0.985 | 1.035 | 0.958 | 0.943 |
| 161915_f_at | 0.154 | 0.962 | 0.920 | 0.998 | 0.889 |
| 161916_r_at | 0.212 | 0.822 | 0.786 | 0.935 | 0.778 |
| 161917_i_at | 0.330 | 0.947 | 0.923 | 0.962 | 0.900 |
| 161918_at   | 0.187 | 0.931 | 0.806 | 0.911 | 0.823 |
| 161919_r_at | 0.445 | 0.872 | 0.882 | 0.929 | 0.859 |

|             |       |       |       |       |       |
|-------------|-------|-------|-------|-------|-------|
| 161920_r_at | 0.284 | 0.895 | 0.809 | 0.870 | 0.828 |
| 161921_f_at | 0.386 | 0.970 | 0.902 | 0.951 | 0.884 |
| 161922_r_at | 0.240 | 1.049 | 1.046 | 1.020 | 0.980 |
| 161923_at   | 0.345 | 0.915 | 0.860 | 0.966 | 0.929 |
| 161924_f_at | 0.077 | 0.845 | 0.762 | 0.966 | 0.827 |
| 161925_at   | 0.406 | 0.901 | 0.813 | 0.919 | 0.823 |
| 161926_r_at | 0.248 | 0.859 | 0.819 | 0.949 | 0.884 |
| 161927_at   | 0.214 | 0.933 | 0.908 | 0.990 | 1.014 |
| 161928_at   | 0.147 | 0.866 | 0.842 | 0.944 | 0.867 |
| 161929_at   | 0.291 | 0.988 | 0.874 | 1.023 | 0.915 |
| 161930_r_at | 0.308 | 0.973 | 0.989 | 1.032 | 0.972 |
| 161931_r_at | 0.411 | 0.923 | 0.967 | 0.953 | 0.895 |
| 161932_r_at | 0.367 | 0.906 | 0.911 | 0.925 | 0.876 |
| 161933_r_at | 0.379 | 0.843 | 0.780 | 0.915 | 0.832 |
| 161934_f_at | 0.291 | 0.900 | 0.850 | 0.998 | 0.926 |
| 161935_r_at | 0.467 | 0.846 | 0.817 | 0.872 | 0.830 |
| 161936_at   | 0.233 | 0.876 | 0.787 | 0.920 | 0.886 |
| 161937_r_at | 0.287 | 0.822 | 0.781 | 0.943 | 0.860 |
| 161938_r_at | 0.413 | 0.865 | 0.852 | 0.918 | 0.800 |
| 161939_f_at | 0.414 | 0.859 | 0.878 | 0.960 | 0.903 |
| 161940_r_at | 0.427 | 1.002 | 0.980 | 1.002 | 1.000 |
| 161941_r_at | 0.353 | 0.874 | 0.846 | 0.955 | 0.888 |
| 161942_f_at | 0.188 | 0.866 | 0.801 | 0.869 | 0.896 |
| 161943_at   | 0.402 | 0.847 | 0.865 | 0.943 | 0.855 |
| 161944_at   | 0.235 | 1.039 | 0.975 | 1.083 | 1.019 |
| 161945_at   | 0.363 | 0.922 | 0.839 | 0.882 | 0.865 |
| 161946_r_at | 0.116 | 0.736 | 0.607 | 0.874 | 0.791 |
| 161947_f_at | 0.220 | 0.942 | 1.008 | 1.006 | 0.865 |
| 161948_f_at | 0.145 | 1.176 | 1.336 | 1.096 | 1.209 |
| 161949_at   | 0.322 | 0.945 | 0.867 | 0.990 | 0.945 |
| 161950_at   | 0.235 | 0.932 | 0.861 | 0.938 | 0.931 |
| 161951_f_at | 0.166 | 1.052 | 0.954 | 1.061 | 1.051 |
| 161952_r_at | 0.425 | 0.972 | 1.000 | 1.004 | 0.985 |
| 161953_at   | 0.402 | 0.833 | 0.836 | 0.853 | 0.738 |
| 161954_r_at | 0.172 | 0.842 | 0.773 | 0.868 | 0.844 |
| 161955_f_at | 0.443 | 0.904 | 0.863 | 0.944 | 0.869 |
| 161956_at   | 0.448 | 0.864 | 0.808 | 0.905 | 0.805 |
| 161957_r_at | 0.382 | 0.936 | 0.949 | 0.980 | 0.949 |
| 161958_at   | 0.494 | 0.942 | 0.929 | 0.935 | 0.922 |
| 161959_f_at | 0.249 | 0.936 | 0.907 | 0.960 | 0.959 |
| 161960_f_at | 0.106 | 1.053 | 0.973 | 0.999 | 0.958 |
| 161961_at   | 0.323 | 0.832 | 0.842 | 0.916 | 0.850 |
| 161962_f_at | 0.314 | 1.329 | 1.167 | 1.388 | 1.304 |
| 161963_f_at | 0.318 | 0.925 | 0.857 | 0.854 | 0.918 |
| 161964_r_at | 0.249 | 0.863 | 0.806 | 0.936 | 0.881 |
| 161965_r_at | 0.422 | 0.868 | 0.835 | 0.917 | 0.790 |
| 161966_f_at | 0.315 | 0.865 | 0.872 | 0.920 | 0.823 |

|             |       |       |       |       |       |
|-------------|-------|-------|-------|-------|-------|
| 161967_at   | 0.233 | 0.839 | 0.832 | 0.909 | 0.871 |
| 161968_f_at | 0.026 | 1.314 | 3.484 | 1.098 | 1.632 |
| 161969_f_at | 0.323 | 0.928 | 0.951 | 0.926 | 0.922 |
| 161970_f_at | 0.056 | 0.920 | 0.907 | 0.977 | 0.992 |
| 161971_r_at | 0.483 | 0.917 | 0.911 | 0.940 | 0.920 |
| 161972_r_at | 0.410 | 0.941 | 0.875 | 0.912 | 0.914 |
| 161973_r_at | 0.363 | 0.816 | 0.796 | 0.903 | 0.839 |
| 161974_r_at | 0.499 | 0.995 | 1.002 | 1.015 | 0.988 |
| 161975_r_at | 0.465 | 0.900 | 0.878 | 0.924 | 0.913 |
| 161976_r_at | 0.425 | 0.931 | 0.903 | 0.911 | 0.888 |
| 161977_r_at | 0.097 | 0.897 | 1.063 | 0.909 | 0.910 |
| 161978_r_at | 0.422 | 1.006 | 0.983 | 1.023 | 1.012 |
| 161979_f_at | 0.196 | 1.032 | 1.003 | 0.988 | 1.006 |
| 161980_f_at | 0.392 | 1.374 | 1.268 | 1.154 | 1.331 |
| 161981_r_at | 0.420 | 1.007 | 0.980 | 0.970 | 0.972 |
| 161982_at   | 0.331 | 1.017 | 0.951 | 0.991 | 0.986 |
| 161983_f_at | 0.169 | 0.937 | 0.941 | 0.882 | 0.958 |
| 161984_f_at | 0.243 | 0.981 | 1.221 | 1.074 | 1.086 |
| 161985_f_at | 0.334 | 1.033 | 0.994 | 0.987 | 0.984 |
| 161986_f_at | 0.338 | 0.895 | 0.864 | 0.977 | 0.896 |
| 161987_at   | 0.383 | 0.958 | 0.889 | 0.933 | 0.865 |
| 161988_f_at | 0.296 | 0.921 | 0.891 | 0.895 | 0.946 |
| 161989_f_at | 0.358 | 0.994 | 0.978 | 1.084 | 0.965 |
| 161990_f_at | 0.189 | 1.126 | 1.030 | 1.026 | 1.067 |
| 161991_at   | 0.383 | 0.940 | 0.874 | 0.962 | 0.902 |
| 161992_at   | 0.355 | 0.951 | 0.986 | 0.979 | 0.926 |
| 161993_r_at | 0.390 | 0.895 | 0.943 | 0.917 | 0.873 |
| 161994_f_at | 0.353 | 0.975 | 0.863 | 0.952 | 0.893 |
| 161995_r_at | 0.269 | 0.875 | 0.854 | 0.961 | 0.873 |
| 161996_f_at | 0.378 | 0.728 | 0.735 | 0.773 | 0.622 |
| 161997_f_at | 0.347 | 1.041 | 0.996 | 0.941 | 1.056 |
| 161998_f_at | 0.212 | 0.923 | 0.815 | 0.945 | 0.882 |
| 161999_at   | 0.117 | 0.932 | 0.804 | 0.981 | 0.872 |
| 162000_r_at | 0.290 | 0.896 | 0.862 | 0.953 | 0.926 |
| 162001_f_at | 0.276 | 1.092 | 1.035 | 0.992 | 1.106 |
| 162002_r_at | 0.494 | 0.767 | 0.747 | 0.805 | 0.698 |
| 162003_at   | 0.391 | 0.953 | 0.932 | 0.975 | 0.978 |
| 162004_i_at | 0.308 | 0.865 | 0.789 | 0.934 | 0.847 |
| 162005_at   | 0.397 | 0.830 | 0.799 | 0.877 | 0.824 |
| 162006_r_at | 0.323 | 0.858 | 0.863 | 0.960 | 0.901 |
| 162007_i_at | 0.181 | 0.978 | 0.916 | 1.009 | 0.864 |
| 162008_r_at | 0.371 | 1.012 | 0.969 | 1.036 | 1.010 |
| 162009_f_at | 0.427 | 0.896 | 0.886 | 0.941 | 0.870 |
| 162010_r_at | 0.216 | 1.012 | 0.904 | 0.898 | 0.985 |
| 162011_f_at | 0.331 | 0.975 | 0.926 | 0.960 | 0.960 |
| 162012_r_at | 0.495 | 0.952 | 0.953 | 0.965 | 0.957 |
| 162013_f_at | 0.300 | 0.986 | 0.953 | 0.962 | 0.970 |

|             |       |       |       |       |       |
|-------------|-------|-------|-------|-------|-------|
| 162014_i_at | 0.320 | 0.868 | 0.946 | 0.940 | 0.879 |
| 162015_f_at | 0.481 | 0.997 | 0.959 | 1.042 | 0.968 |
| 162016_f_at | 0.328 | 0.916 | 0.890 | 0.975 | 0.837 |
| 162017_at   | 0.449 | 0.819 | 0.791 | 0.886 | 0.788 |
| 162018_r_at | 0.465 | 0.831 | 0.800 | 0.877 | 0.827 |
| 162019_r_at | 0.370 | 0.920 | 0.906 | 0.993 | 0.952 |
| 162020_at   | 0.420 | 0.954 | 0.903 | 0.979 | 0.911 |
| 162021_r_at | 0.370 | 0.944 | 0.912 | 1.002 | 0.924 |
| 162022_f_at | 0.398 | 0.968 | 0.910 | 0.978 | 0.953 |
| 162023_f_at | 0.357 | 1.011 | 0.969 | 0.967 | 0.953 |
| 162024_at   | 0.481 | 0.793 | 0.749 | 0.844 | 0.716 |
| 162025_r_at | 0.340 | 1.012 | 0.982 | 1.058 | 1.020 |
| 162026_r_at | 0.405 | 0.809 | 0.757 | 0.884 | 0.791 |
| 162027_f_at | 0.504 | 0.825 | 0.786 | 0.874 | 0.794 |
| 162028_f_at | 0.461 | 0.890 | 0.855 | 0.928 | 0.851 |
| 162029_r_at | 0.238 | 0.939 | 0.913 | 0.984 | 0.944 |
| 162030_r_at | 0.413 | 0.783 | 0.753 | 0.754 | 0.652 |
| 162031_f_at | 0.178 | 0.903 | 0.833 | 0.963 | 0.861 |
| 162032_f_at | 0.369 | 1.017 | 0.974 | 1.026 | 0.987 |
| 162033_f_at | 0.490 | 0.934 | 0.899 | 0.956 | 0.930 |
| 162034_r_at | 0.402 | 1.022 | 1.042 | 1.031 | 1.000 |
| 162035_f_at | 0.260 | 0.919 | 0.951 | 0.997 | 0.998 |
| 162036_r_at | 0.254 | 0.839 | 0.778 | 0.918 | 0.850 |
| 162037_f_at | 0.308 | 0.860 | 0.811 | 0.903 | 0.899 |
| 162038_f_at | 0.261 | 0.936 | 0.904 | 0.993 | 0.894 |
| 162039_f_at | 0.441 | 0.907 | 0.890 | 0.947 | 0.886 |
| 162040_r_at | 0.347 | 0.935 | 0.962 | 0.931 | 0.917 |
| 162041_f_at | 0.255 | 0.918 | 0.840 | 0.944 | 0.950 |
| 162042_i_at | 0.342 | 0.783 | 0.811 | 0.858 | 0.734 |
| 162043_i_at | 0.478 | 0.972 | 0.935 | 1.004 | 0.958 |
| 162044_f_at | 0.048 | 1.093 | 0.927 | 1.062 | 1.006 |
| 162045_r_at | 0.166 | 0.874 | 0.759 | 0.949 | 0.872 |
| 162046_at   | 0.412 | 0.964 | 0.932 | 0.948 | 0.920 |
| 162047_f_at | 0.427 | 0.865 | 0.884 | 0.892 | 0.872 |
| 162048_r_at | 0.375 | 0.910 | 0.846 | 0.965 | 0.904 |
| 162049_f_at | 0.337 | 0.916 | 0.959 | 0.977 | 0.974 |
| 162050_at   | 0.266 | 0.877 | 0.815 | 0.899 | 0.896 |
| 162051_r_at | 0.257 | 0.971 | 0.931 | 1.000 | 0.946 |
| 162052_i_at | 0.438 | 0.990 | 0.969 | 0.960 | 0.939 |
| 162053_i_at | 0.319 | 0.875 | 0.820 | 0.897 | 0.832 |
| 162054_r_at | 0.474 | 0.838 | 0.817 | 0.863 | 0.851 |
| 162055_f_at | 0.202 | 1.000 | 1.037 | 1.086 | 1.055 |
| 162056_f_at | 0.390 | 0.860 | 0.824 | 0.925 | 0.856 |
| 162057_f_at | 0.177 | 1.109 | 1.219 | 1.047 | 1.175 |
| 162058_f_at | 0.500 | 0.920 | 0.885 | 0.946 | 0.904 |
| 162059_r_at | 0.448 | 0.941 | 0.916 | 0.967 | 0.926 |
| 162060_r_at | 0.461 | 0.768 | 0.747 | 0.825 | 0.687 |

|             |       |       |       |       |       |
|-------------|-------|-------|-------|-------|-------|
| 162061_f_at | 0.288 | 0.923 | 0.878 | 0.953 | 0.848 |
| 162062_r_at | 0.196 | 0.997 | 1.033 | 0.962 | 0.964 |
| 162063_f_at | 0.304 | 0.992 | 0.949 | 0.945 | 0.968 |
| 162064_at   | 0.355 | 0.909 | 0.905 | 0.947 | 0.963 |
| 162065_r_at | 0.228 | 0.802 | 0.728 | 0.877 | 0.740 |
| 162066_f_at | 0.283 | 1.078 | 0.986 | 0.998 | 1.065 |
| 162067_at   | 0.474 | 0.806 | 0.723 | 0.854 | 0.752 |
| 162068_r_at | 0.388 | 0.894 | 0.808 | 0.859 | 0.801 |
| 162069_at   | 0.424 | 0.837 | 0.861 | 0.939 | 0.852 |
| 162070_r_at | 0.385 | 0.905 | 0.917 | 0.943 | 0.944 |
| 162071_i_at | 0.422 | 0.818 | 0.807 | 0.886 | 0.723 |
| 162072_at   | 0.448 | 0.788 | 0.816 | 0.853 | 0.778 |
| 162073_r_at | 0.401 | 0.982 | 0.936 | 0.962 | 0.956 |
| 162074_r_at | 0.323 | 0.845 | 0.823 | 0.954 | 0.811 |
| 162075_r_at | 0.444 | 0.942 | 0.963 | 0.967 | 0.957 |
| 162076_r_at | 0.274 | 0.967 | 0.978 | 0.948 | 0.980 |
| 162077_f_at | 0.382 | 1.218 | 1.195 | 1.174 | 1.175 |
| 162078_at   | 0.300 | 0.946 | 0.968 | 0.968 | 0.989 |
| 162079_at   | 0.354 | 0.911 | 0.848 | 0.966 | 0.837 |
| 162080_f_at | 0.303 | 0.976 | 0.941 | 1.002 | 0.915 |
| 162081_f_at | 0.350 | 1.093 | 1.053 | 1.025 | 1.072 |
| 162082_r_at | 0.496 | 0.849 | 0.824 | 0.893 | 0.830 |
| 162083_f_at | 0.323 | 1.034 | 1.010 | 1.021 | 1.057 |
| 162084_i_at | 0.417 | 0.735 | 0.659 | 0.770 | 0.723 |
| 162085_r_at | 0.238 | 0.923 | 0.914 | 0.978 | 0.910 |
| 162086_r_at | 0.364 | 1.050 | 0.995 | 1.041 | 1.021 |
| 162087_f_at | 0.389 | 0.863 | 0.862 | 0.915 | 0.893 |
| 162088_r_at | 0.440 | 0.905 | 0.876 | 0.905 | 0.840 |
| 162089_r_at | 0.235 | 0.868 | 0.852 | 0.973 | 0.867 |
| 162090_i_at | 0.356 | 0.919 | 0.887 | 0.938 | 0.869 |
| 162091_f_at | 0.173 | 1.126 | 1.031 | 1.119 | 1.131 |
| 162092_f_at | 0.388 | 0.969 | 0.926 | 0.934 | 0.944 |
| 162093_at   | 0.440 | 0.857 | 0.820 | 0.919 | 0.862 |
| 162094_f_at | 0.323 | 1.210 | 1.197 | 1.078 | 1.239 |
| 162095_f_at | 0.318 | 0.885 | 0.965 | 0.909 | 0.895 |
| 162096_at   | 0.449 | 0.811 | 0.756 | 0.834 | 0.804 |
| 162097_r_at | 0.445 | 0.946 | 0.913 | 0.958 | 0.897 |
| 162098_i_at | 0.345 | 0.925 | 0.885 | 1.009 | 0.877 |
| 162099_f_at | 0.349 | 0.873 | 0.899 | 0.919 | 0.922 |
| 162100_r_at | 0.481 | 0.857 | 0.863 | 0.927 | 0.857 |
| 162101_f_at | 0.202 | 1.003 | 0.959 | 1.026 | 0.932 |
| 162102_r_at | 0.291 | 0.908 | 0.900 | 0.980 | 0.911 |
| 162103_i_at | 0.208 | 0.808 | 0.765 | 0.900 | 0.819 |
| 162104_f_at | 0.470 | 1.005 | 0.980 | 0.977 | 0.979 |
| 162105_r_at | 0.390 | 0.827 | 0.724 | 0.833 | 0.773 |
| 162106_f_at | 0.374 | 0.807 | 0.795 | 0.887 | 0.803 |
| 162107_r_at | 0.273 | 1.039 | 1.005 | 0.979 | 1.015 |

|             |       |       |       |       |       |
|-------------|-------|-------|-------|-------|-------|
| 162108_f_at | 0.507 | 0.927 | 0.918 | 0.936 | 0.924 |
| 162109_f_at | 0.181 | 1.049 | 1.009 | 0.956 | 1.054 |
| 162110_f_at | 0.301 | 0.936 | 0.939 | 0.952 | 0.877 |
| 162111_r_at | 0.509 | 1.007 | 0.998 | 1.008 | 0.992 |
| 162112_i_at | 0.459 | 0.936 | 0.940 | 0.994 | 0.913 |
| 162113_r_at | 0.441 | 0.833 | 0.864 | 0.917 | 0.865 |
| 162114_f_at | 0.463 | 0.974 | 0.950 | 0.967 | 0.986 |
| 162115_i_at | 0.330 | 0.845 | 0.826 | 0.893 | 0.897 |
| 162116_r_at | 0.325 | 0.920 | 0.858 | 0.892 | 0.891 |
| 162117_f_at | 0.375 | 0.957 | 0.974 | 0.953 | 0.925 |
| 162118_f_at | 0.297 | 1.015 | 0.937 | 1.018 | 1.021 |
| 162119_r_at | 0.348 | 1.029 | 1.009 | 1.018 | 0.980 |
| 162120_at   | 0.440 | 0.977 | 0.944 | 0.961 | 0.969 |
| 162121_at   | 0.434 | 0.879 | 0.871 | 0.905 | 0.853 |
| 162122_f_at | 0.288 | 0.900 | 0.797 | 0.947 | 0.868 |
| 162123_f_at | 0.325 | 0.847 | 0.843 | 0.941 | 0.883 |
| 162124_r_at | 0.436 | 0.956 | 0.920 | 0.976 | 0.963 |
| 162125_f_at | 0.238 | 1.046 | 0.969 | 1.065 | 0.996 |
| 162126_r_at | 0.355 | 0.949 | 0.930 | 0.922 | 0.941 |
| 162127_r_at | 0.243 | 0.892 | 0.837 | 0.947 | 0.940 |
| 162128_i_at | 0.454 | 0.845 | 0.805 | 0.872 | 0.824 |
| 162129_f_at | 0.497 | 0.961 | 0.959 | 0.948 | 0.957 |
| 162130_r_at | 0.428 | 0.908 | 0.870 | 0.900 | 0.866 |
| 162131_f_at | 0.312 | 0.885 | 0.833 | 0.930 | 0.890 |
| 162132_f_at | 0.342 | 0.922 | 0.917 | 1.013 | 0.943 |
| 162133_at   | 0.445 | 0.944 | 0.896 | 0.939 | 0.897 |
| 162134_r_at | 0.400 | 0.807 | 0.762 | 0.877 | 0.794 |
| 162135_r_at | 0.484 | 0.995 | 0.987 | 0.997 | 0.971 |
| 162136_r_at | 0.436 | 0.893 | 0.893 | 0.990 | 0.922 |
| 162137_f_at | 0.477 | 0.822 | 0.804 | 0.909 | 0.779 |
| 162138_s_at | 0.299 | 1.332 | 1.133 | 1.030 | 1.216 |
| 162139_r_at | 0.249 | 0.995 | 0.939 | 1.035 | 0.968 |
| 162140_i_at | 0.504 | 0.859 | 0.869 | 0.901 | 0.872 |
| 162141_r_at | 0.421 | 1.011 | 0.992 | 0.980 | 0.976 |
| 162142_f_at | 0.481 | 0.839 | 0.813 | 0.868 | 0.786 |
| 162143_f_at | 0.433 | 0.909 | 0.874 | 0.913 | 0.923 |
| 162144_at   | 0.433 | 0.805 | 0.788 | 0.871 | 0.795 |
| 162145_r_at | 0.175 | 1.033 | 0.919 | 0.993 | 0.947 |
| 162146_r_at | 0.380 | 0.993 | 0.991 | 0.952 | 0.938 |
| 162147_f_at | 0.323 | 0.932 | 0.889 | 0.975 | 0.865 |
| 162148_r_at | 0.220 | 0.947 | 0.916 | 0.951 | 0.859 |
| 162149_i_at | 0.194 | 0.825 | 0.821 | 0.920 | 0.707 |
| 162150_r_at | 0.364 | 0.781 | 0.753 | 0.870 | 0.781 |
| 162151_i_at | 0.454 | 0.938 | 0.907 | 0.967 | 0.969 |
| 162152_r_at | 0.308 | 0.967 | 0.917 | 1.066 | 0.999 |
| 162153_i_at | 0.262 | 0.963 | 0.885 | 1.016 | 0.934 |
| 162154_i_at | 0.423 | 0.935 | 0.922 | 1.014 | 0.937 |

|             |       |       |       |       |       |
|-------------|-------|-------|-------|-------|-------|
| 162155_f_at | 0.434 | 0.873 | 0.838 | 0.856 | 0.821 |
| 162156_f_at | 0.151 | 0.880 | 0.858 | 0.873 | 0.911 |
| 162157_f_at | 0.364 | 0.871 | 0.896 | 0.942 | 0.905 |
| 162158_r_at | 0.411 | 0.922 | 0.883 | 0.944 | 0.905 |
| 162159_i_at | 0.467 | 0.878 | 0.830 | 0.914 | 0.860 |
| 162160_at   | 0.307 | 0.864 | 0.809 | 0.957 | 0.871 |
| 162161_r_at | 0.346 | 0.885 | 0.831 | 0.879 | 0.835 |
| 162162_f_at | 0.278 | 0.993 | 0.952 | 1.040 | 0.991 |
| 162163_at   | 0.364 | 0.919 | 0.858 | 0.966 | 0.904 |
| 162164_f_at | 0.132 | 0.854 | 0.780 | 0.934 | 0.786 |
| 162165_f_at | 0.481 | 0.943 | 0.911 | 0.938 | 0.925 |
| 162166_f_at | 0.393 | 0.920 | 0.907 | 0.966 | 0.942 |
| 162167_f_at | 0.390 | 0.918 | 0.839 | 0.941 | 0.868 |
| 162168_r_at | 0.423 | 0.902 | 0.901 | 0.937 | 0.926 |
| 162169_r_at | 0.358 | 0.936 | 0.909 | 1.034 | 0.884 |
| 162170_r_at | 0.346 | 0.946 | 0.899 | 0.966 | 0.950 |
| 162171_f_at | 0.119 | 1.252 | 1.183 | 1.008 | 1.275 |
| 162172_f_at | 0.458 | 1.031 | 1.071 | 1.014 | 1.028 |
| 162173_i_at | 0.163 | 0.877 | 0.844 | 0.944 | 0.898 |
| 162174_at   | 0.468 | 0.852 | 0.812 | 0.916 | 0.816 |
| 162175_at   | 0.496 | 0.900 | 0.873 | 0.956 | 0.880 |
| 162176_r_at | 0.405 | 0.817 | 0.865 | 0.880 | 0.809 |
| 162177_f_at | 0.268 | 1.008 | 0.992 | 0.986 | 1.037 |
| 162178_r_at | 0.475 | 0.762 | 0.747 | 0.853 | 0.707 |
| 162179_r_at | 0.396 | 1.014 | 0.947 | 1.017 | 0.970 |
| 162180_r_at | 0.441 | 0.918 | 0.914 | 0.937 | 0.870 |
| 162181_f_at | 0.191 | 0.900 | 0.985 | 1.012 | 1.014 |
| 162182_f_at | 0.328 | 0.799 | 0.833 | 0.829 | 0.798 |
| 162183_at   | 0.421 | 0.779 | 0.732 | 0.822 | 0.735 |
| 162184_at   | 0.452 | 0.889 | 0.915 | 0.946 | 0.878 |
| 162185_i_at | 0.458 | 0.944 | 0.911 | 0.977 | 0.907 |
| 162186_r_at | 0.309 | 0.795 | 0.741 | 0.936 | 0.757 |
| 162187_f_at | 0.266 | 0.436 | 0.791 | 0.741 | 0.412 |
| 162188_f_at | 0.206 | 0.966 | 0.869 | 0.993 | 0.902 |
| 162189_r_at | 0.480 | 0.773 | 0.774 | 0.787 | 0.758 |
| 162190_r_at | 0.406 | 0.806 | 0.791 | 0.828 | 0.697 |
| 162191_at   | 0.412 | 0.920 | 0.912 | 0.952 | 0.934 |
| 162192_f_at | 0.342 | 0.814 | 0.729 | 0.852 | 0.718 |
| 162193_f_at | 0.406 | 0.910 | 0.922 | 0.955 | 0.927 |
| 162194_r_at | 0.120 | 0.991 | 0.956 | 1.004 | 1.016 |
| 162195_i_at | 0.332 | 0.902 | 0.923 | 0.939 | 0.964 |
| 162196_f_at | 0.410 | 0.977 | 0.943 | 1.079 | 0.968 |
| 162197_at   | 0.220 | 0.960 | 0.910 | 0.939 | 0.856 |
| 162198_f_at | 0.066 | 1.048 | 1.344 | 0.946 | 1.471 |
| 162199_r_at | 0.419 | 0.743 | 0.703 | 0.778 | 0.661 |
| 162200_r_at | 0.330 | 0.984 | 1.006 | 1.026 | 0.975 |
| 162201_r_at | 0.475 | 0.987 | 0.993 | 0.986 | 0.980 |



|             |       |       |       |       |       |
|-------------|-------|-------|-------|-------|-------|
| 162202_f_at | 0.113 | 1.053 | 0.943 | 0.948 | 0.929 |
| 162203_r_at | 0.470 | 1.003 | 0.969 | 0.998 | 0.971 |
| 162204_r_at | 0.342 | 1.059 | 0.967 | 0.926 | 1.016 |
| 162205_f_at | 0.444 | 0.827 | 0.816 | 0.888 | 0.795 |
| 162206_f_at | 0.126 | 1.150 | 1.249 | 1.024 | 1.100 |
| 162207_f_at | 0.429 | 0.930 | 0.932 | 0.929 | 0.920 |
| 162208_f_at | 0.136 | 1.173 | 1.061 | 1.102 | 0.999 |
| 162209_r_at | 0.249 | 0.983 | 0.947 | 0.940 | 0.910 |
| 162210_r_at | 0.497 | 0.980 | 0.958 | 0.994 | 0.965 |
| 162211_r_at | 0.270 | 0.922 | 0.918 | 1.004 | 0.894 |
| 162212_at   | 0.343 | 0.914 | 0.854 | 0.923 | 0.876 |
| 162213_i_at | 0.411 | 0.870 | 0.843 | 0.947 | 0.906 |
| 162214_r_at | 0.277 | 0.848 | 0.819 | 0.938 | 0.863 |
| 162215_f_at | 0.370 | 0.995 | 0.998 | 0.995 | 0.947 |
| 162216_i_at | 0.492 | 0.824 | 0.803 | 0.869 | 0.815 |
| 162217_r_at | 0.444 | 0.927 | 0.902 | 0.954 | 0.917 |
| 162218_f_at | 0.365 | 0.937 | 0.936 | 0.986 | 0.974 |
| 162219_f_at | 0.337 | 1.021 | 0.951 | 0.975 | 1.005 |
| 162220_r_at | 0.440 | 0.789 | 0.809 | 0.836 | 0.705 |
| 162221_i_at | 0.400 | 1.028 | 1.053 | 1.001 | 0.979 |
| 162222_r_at | 0.330 | 0.869 | 0.845 | 0.964 | 0.866 |
| 162223_f_at | 0.261 | 1.050 | 0.803 | 1.361 | 0.860 |
| 162224_r_at | 0.284 | 0.910 | 0.819 | 0.890 | 0.840 |
| 162225_f_at | 0.505 | 0.948 | 0.914 | 0.956 | 0.919 |
| 162226_r_at | 0.385 | 0.951 | 0.939 | 1.022 | 0.962 |
| 162227_r_at | 0.492 | 0.843 | 0.797 | 0.899 | 0.784 |
| 162228_f_at | 0.394 | 0.976 | 0.926 | 0.962 | 0.862 |
| 162229_at   | 0.468 | 0.828 | 0.753 | 0.875 | 0.789 |
| 162230_r_at | 0.276 | 0.927 | 0.916 | 0.949 | 0.893 |
| 162231_r_at | 0.346 | 0.810 | 0.721 | 0.857 | 0.728 |
| 162232_r_at | 0.502 | 0.963 | 0.944 | 0.963 | 0.936 |
| 162233_r_at | 0.384 | 1.006 | 0.948 | 1.008 | 0.943 |
| 162234_f_at | 0.179 | 1.150 | 1.039 | 0.990 | 1.134 |
| 162235_f_at | 0.440 | 0.947 | 0.898 | 0.954 | 0.929 |
| 162236_f_at | 0.504 | 0.845 | 0.841 | 0.899 | 0.833 |
| 162237_f_at | 0.422 | 0.871 | 0.858 | 0.943 | 0.869 |
| 162238_r_at | 0.389 | 0.902 | 0.875 | 0.985 | 0.883 |
| 162239_at   | 0.204 | 0.855 | 0.860 | 0.974 | 0.842 |
| 162240_r_at | 0.390 | 0.950 | 0.933 | 1.042 | 0.962 |
| 162241_r_at | 0.422 | 0.969 | 0.941 | 0.979 | 0.985 |
| 162242_at   | 0.342 | 0.888 | 0.853 | 0.908 | 0.900 |
| 162243_f_at | 0.401 | 0.873 | 0.805 | 0.915 | 0.859 |
| 162244_r_at | 0.309 | 0.724 | 0.772 | 0.838 | 0.727 |
| 162245_f_at | 0.215 | 1.181 | 1.084 | 1.006 | 1.140 |
| 162246_r_at | 0.347 | 0.862 | 0.891 | 0.936 | 0.858 |
| 162247_r_at | 0.303 | 0.840 | 0.807 | 0.914 | 0.817 |
| 162248_f_at | 0.276 | 0.946 | 0.931 | 1.013 | 0.986 |

|             |       |        |         |       |        |
|-------------|-------|--------|---------|-------|--------|
| 162249_f_at | 0.268 | 0.918  | 0.880   | 0.943 | 0.922  |
| 162250_f_at | 0.492 | 0.889  | 0.861   | 0.909 | 0.860  |
| 162251_f_at | 0.387 | 0.856  | 0.789   | 0.901 | 0.863  |
| 162252_f_at | 0.502 | 0.979  | 0.941   | 0.958 | 0.944  |
| 162253_i_at | 0.496 | 0.846  | 0.793   | 0.886 | 0.811  |
| 162254_f_at | 0.376 | 0.856  | 0.824   | 0.898 | 0.857  |
| 162255_s_at | 0.354 | 1.023  | 1.018   | 1.017 | 0.987  |
| 162256_r_at | 0.505 | 0.828  | 0.808   | 0.867 | 0.823  |
| 162257_i_at | 0.318 | 0.915  | 0.863   | 0.914 | 0.927  |
| 162258_f_at | 0.445 | 0.960  | 0.918   | 0.985 | 0.959  |
| 162259_f_at | 0.417 | 1.041  | 1.013   | 1.058 | 0.978  |
| 162260_at   | 0.229 | 0.967  | 1.009   | 0.962 | 1.031  |
| 162261_f_at | 0.376 | 0.896  | 0.817   | 0.929 | 0.863  |
| 162262_f_at | 0.200 | 1.170  | 1.443   | 1.031 | 1.488  |
| 162263_f_at | 0.293 | 1.157  | 0.968   | 1.045 | 1.073  |
| 162264_s_at | 0.438 | 0.879  | 0.839   | 0.864 | 0.838  |
| 162265_r_at | 0.405 | 0.925  | 0.865   | 0.973 | 0.913  |
| 162266_f_at | 0.326 | 0.945  | 0.890   | 0.981 | 0.940  |
| 162267_r_at | 0.505 | 0.733  | 0.691   | 0.796 | 0.706  |
| 162268_at   | 0.374 | 0.849  | 0.873   | 0.928 | 0.856  |
| 162269_at   | 0.415 | 1.048  | 0.988   | 1.037 | 1.016  |
| 162270_r_at | 0.416 | 0.901  | 0.888   | 0.938 | 0.911  |
| 162271_f_at | 0.279 | 1.003  | 1.127   | 1.062 | 1.047  |
| 162272_r_at | 0.401 | 0.845  | 0.821   | 0.819 | 0.778  |
| 162273_at   | 0.454 | 0.822  | 0.775   | 0.905 | 0.814  |
| 162274_f_at | 0.364 | 1.056  | 1.082   | 1.091 | 1.022  |
| 162275_f_at | 0.386 | 0.958  | 0.940   | 0.922 | 0.928  |
| 162276_i_at | 0.336 | 0.904  | 0.963   | 0.960 | 0.998  |
| 162277_r_at | 0.494 | 0.961  | 0.937   | 0.953 | 0.930  |
| 162278_r_at | 0.290 | 0.857  | 0.763   | 0.896 | 0.847  |
| 162279_f_at | 0.232 | 1.049  | 1.063   | 1.008 | 0.983  |
| 162280_f_at | 0.403 | 0.933  | 0.900   | 0.925 | 0.942  |
| 162281_at   | 0.282 | 0.808  | 0.841   | 0.928 | 0.814  |
| 162282_f_at | 0.096 | 0.886  | 0.859   | 0.976 | 0.847  |
| 162283_r_at | 0.392 | 0.987  | 0.905   | 0.982 | 0.902  |
| 162284_r_at | 0.305 | 0.893  | 0.821   | 0.916 | 0.886  |
| 162285_r_at | 0.484 | 1.005  | 0.983   | 1.010 | 0.968  |
| 162286_r_at | 0.237 | 0.982  | 1.004   | 0.989 | 0.896  |
| 162287_r_at | 0.015 | 12.595 | 115.198 | 2.192 | 40.353 |
| 162288_f_at | 0.496 | 0.939  | 0.928   | 0.973 | 0.938  |
| 162289_at   | 0.470 | 0.990  | 1.012   | 0.985 | 0.990  |
| 162290_f_at | 0.298 | 0.827  | 0.777   | 0.894 | 0.838  |
| 162291_r_at | 0.484 | 0.929  | 0.900   | 0.922 | 0.912  |
| 162292_r_at | 0.072 | 0.886  | 0.848   | 1.009 | 0.886  |
| 162293_r_at | 0.273 | 0.848  | 0.777   | 0.950 | 0.815  |
| 162294_f_at | 0.323 | 0.958  | 0.908   | 0.942 | 0.946  |
| 162295_at   | 0.376 | 0.914  | 0.856   | 0.937 | 0.882  |

|             |       |       |       |       |       |
|-------------|-------|-------|-------|-------|-------|
| 162296_at   | 0.322 | 0.881 | 0.805 | 0.921 | 0.814 |
| 162297_s_at | 0.456 | 1.116 | 1.094 | 1.238 | 1.131 |
| 162298_r_at | 0.483 | 0.967 | 0.947 | 0.978 | 0.939 |
| 162299_f_at | 0.256 | 1.143 | 1.120 | 1.086 | 1.052 |
| 162300_at   | 0.440 | 0.985 | 0.956 | 1.005 | 0.980 |
| 162301_f_at | 0.250 | 0.981 | 0.883 | 0.909 | 0.942 |
| 162302_f_at | 0.368 | 0.881 | 0.823 | 0.945 | 0.869 |
| 162303_f_at | 0.181 | 0.909 | 0.850 | 0.980 | 0.912 |
| 162304_r_at | 0.500 | 0.929 | 0.894 | 0.950 | 0.912 |
| 162305_f_at | 0.467 | 0.914 | 0.893 | 0.970 | 0.862 |
| 162306_at   | 0.304 | 0.925 | 0.867 | 0.883 | 0.876 |
| 162307_at   | 0.391 | 0.836 | 0.866 | 0.880 | 0.861 |
| 162308_f_at | 0.144 | 0.915 | 0.881 | 0.955 | 0.973 |
| 162309_at   | 0.196 | 0.958 | 0.817 | 0.954 | 0.958 |
| 162310_r_at | 0.468 | 0.867 | 0.880 | 0.938 | 0.850 |
| 162311_f_at | 0.231 | 0.856 | 0.796 | 0.958 | 0.847 |
| 162312_f_at | 0.407 | 0.953 | 0.992 | 0.979 | 0.960 |
| 162313_f_at | 0.124 | 1.197 | 1.256 | 1.121 | 1.088 |
| 162314_at   | 0.275 | 0.906 | 0.944 | 0.990 | 0.961 |
| 162315_f_at | 0.429 | 0.940 | 0.888 | 0.946 | 0.866 |
| 162316_f_at | 0.208 | 0.901 | 0.891 | 1.001 | 0.866 |
| 162317_r_at | 0.456 | 0.900 | 0.914 | 0.947 | 0.862 |
| 162318_r_at | 0.355 | 0.770 | 0.824 | 0.789 | 0.793 |
| 162319_i_at | 0.293 | 0.830 | 0.814 | 0.887 | 0.742 |
| 162320_at   | 0.235 | 0.889 | 0.846 | 0.982 | 0.885 |
| 162321_f_at | 0.500 | 0.884 | 0.847 | 0.916 | 0.851 |
| 162322_r_at | 0.328 | 0.910 | 0.866 | 0.920 | 0.918 |
| 162323_at   | 0.308 | 0.895 | 0.823 | 0.961 | 0.872 |
| 162324_at   | 0.432 | 0.914 | 0.893 | 0.953 | 0.876 |
| 162325_f_at | 0.363 | 1.031 | 0.901 | 1.207 | 0.914 |
| 162326_at   | 0.308 | 0.944 | 0.848 | 0.961 | 0.889 |
| 162327_f_at | 0.272 | 0.961 | 1.013 | 1.068 | 0.930 |
| 162328_f_at | 0.478 | 0.924 | 0.894 | 0.927 | 0.882 |
| 162329_r_at | 0.445 | 0.841 | 0.817 | 0.906 | 0.838 |
| 162330_f_at | 0.257 | 0.814 | 0.764 | 0.928 | 0.822 |
| 162331_f_at | 0.231 | 0.856 | 0.814 | 0.928 | 0.832 |
| 162332_f_at | 0.223 | 1.239 | 1.047 | 1.129 | 1.010 |
| 162333_r_at | 0.436 | 0.798 | 0.813 | 0.842 | 0.829 |
| 162334_r_at | 0.390 | 0.954 | 0.899 | 0.996 | 0.982 |
| 162335_at   | 0.477 | 0.928 | 0.910 | 0.950 | 0.916 |
| 162336_r_at | 0.484 | 0.932 | 0.916 | 0.975 | 0.922 |
| 162337_f_at | 0.267 | 0.902 | 0.852 | 0.955 | 0.889 |
| 162338_r_at | 0.203 | 0.850 | 0.833 | 0.963 | 0.853 |
| 162339_r_at | 0.505 | 0.851 | 0.799 | 0.868 | 0.783 |
| 162340_r_at | 0.350 | 0.870 | 0.838 | 0.936 | 0.890 |
| 162341_r_at | 0.304 | 0.914 | 0.875 | 0.962 | 0.943 |
| 162342_at   | 0.441 | 0.867 | 0.857 | 0.879 | 0.821 |

|             |       |       |       |       |       |
|-------------|-------|-------|-------|-------|-------|
| 162343_f_at | 0.316 | 0.991 | 1.015 | 1.022 | 1.007 |
| 162344_at   | 0.507 | 0.915 | 0.909 | 0.937 | 0.902 |
| 162345_at   | 0.495 | 0.901 | 0.886 | 0.901 | 0.860 |
| 162346_f_at | 0.117 | 0.940 | 1.003 | 0.912 | 0.959 |
| 162347_f_at | 0.280 | 0.995 | 0.915 | 0.985 | 0.955 |
| 162348_r_at | 0.425 | 0.909 | 0.903 | 0.939 | 0.867 |
| 162349_i_at | 0.320 | 1.029 | 0.964 | 0.959 | 0.947 |
| 162350_at   | 0.382 | 1.032 | 1.023 | 1.001 | 1.096 |
| 162351_f_at | 0.224 | 0.963 | 0.942 | 0.989 | 1.026 |
| 162352_r_at | 0.424 | 0.978 | 0.949 | 1.005 | 0.961 |
| 162353_at   | 0.349 | 0.954 | 0.892 | 0.977 | 0.887 |
| 162354_f_at | 0.446 | 0.780 | 0.711 | 0.831 | 0.717 |
| 162355_at   | 0.411 | 0.968 | 0.948 | 1.038 | 0.920 |
| 162356_r_at | 0.410 | 0.883 | 0.871 | 0.960 | 0.872 |
| 162357_at   | 0.380 | 0.865 | 0.839 | 0.898 | 0.855 |
| 162358_i_at | 0.263 | 1.015 | 0.936 | 1.285 | 0.929 |
| 162359_r_at | 0.302 | 0.891 | 0.851 | 0.997 | 0.888 |
| 162360_f_at | 0.254 | 0.867 | 0.845 | 0.938 | 0.874 |
| 162361_at   | 0.255 | 0.862 | 0.799 | 0.928 | 0.897 |
| 162362_f_at | 0.354 | 0.982 | 1.086 | 1.000 | 1.082 |
| 162363_at   | 0.419 | 0.779 | 0.673 | 0.776 | 0.705 |
| 162364_f_at | 0.454 | 0.799 | 0.760 | 0.878 | 0.747 |
| 162365_i_at | 0.369 | 0.861 | 0.829 | 0.935 | 0.870 |
| 162366_r_at | 0.467 | 0.991 | 0.940 | 0.980 | 0.968 |
| 162367_f_at | 0.299 | 1.030 | 0.962 | 1.009 | 0.969 |
| 162368_r_at | 0.391 | 0.890 | 0.845 | 0.855 | 0.875 |
| 162369_f_at | 0.365 | 0.934 | 0.873 | 0.924 | 0.916 |
| 162370_r_at | 0.434 | 0.906 | 0.870 | 0.948 | 0.891 |
| 162371_r_at | 0.322 | 0.852 | 0.810 | 0.946 | 0.814 |
| 162372_f_at | 0.461 | 0.901 | 0.880 | 0.929 | 0.901 |
| 162373_r_at | 0.415 | 0.764 | 0.770 | 0.815 | 0.675 |
| 162374_r_at | 0.499 | 0.777 | 0.740 | 0.830 | 0.759 |
| 162375_i_at | 0.398 | 0.930 | 0.908 | 0.923 | 0.887 |
| 162376_r_at | 0.376 | 0.907 | 0.916 | 0.900 | 0.880 |
| 162377_f_at | 0.494 | 0.997 | 0.998 | 0.987 | 0.979 |
| 162378_r_at | 0.362 | 0.970 | 0.919 | 0.949 | 0.923 |
| 162379_r_at | 0.162 | 0.862 | 0.773 | 0.956 | 1.001 |
| 162380_r_at | 0.273 | 0.840 | 0.787 | 0.929 | 0.816 |
| 162381_f_at | 0.179 | 0.901 | 0.860 | 0.963 | 0.825 |
| 162382_f_at | 0.377 | 0.914 | 0.909 | 0.985 | 0.925 |
| 162383_r_at | 0.325 | 0.805 | 0.777 | 0.904 | 0.775 |
| 162384_f_at | 0.481 | 0.994 | 0.990 | 0.995 | 1.008 |
| 162385_i_at | 0.256 | 0.951 | 0.852 | 0.984 | 0.974 |
| 162386_at   | 0.363 | 0.990 | 0.938 | 0.985 | 0.991 |
| 162387_f_at | 0.438 | 0.948 | 0.888 | 0.952 | 0.884 |
| 162388_r_at | 0.433 | 0.878 | 0.813 | 0.930 | 0.845 |
| 162389_at   | 0.424 | 0.882 | 0.801 | 0.966 | 0.876 |

|             |       |       |       |       |       |
|-------------|-------|-------|-------|-------|-------|
| 162390_r_at | 0.436 | 0.925 | 0.894 | 0.941 | 0.907 |
| 162391_r_at | 0.428 | 0.992 | 0.956 | 0.992 | 0.991 |
| 162392_r_at | 0.275 | 0.874 | 0.905 | 0.956 | 0.898 |
| 162393_at   | 0.342 | 1.021 | 0.966 | 1.050 | 1.008 |
| 162394_r_at | 0.445 | 0.763 | 0.737 | 0.831 | 0.741 |
| 162395_r_at | 0.475 | 0.815 | 0.782 | 0.808 | 0.803 |
| 162396_at   | 0.300 | 0.908 | 0.833 | 0.951 | 0.839 |
| 162397_r_at | 0.468 | 0.812 | 0.799 | 0.847 | 0.719 |
| 162398_at   | 0.332 | 0.888 | 0.798 | 0.942 | 0.851 |
| 162399_f_at | 0.273 | 1.568 | 1.364 | 1.152 | 1.383 |
| 162400_f_at | 0.319 | 0.982 | 0.939 | 0.959 | 0.982 |
| 162401_f_at | 0.273 | 1.024 | 1.003 | 1.060 | 0.940 |
| 162402_r_at | 0.291 | 0.801 | 0.802 | 0.888 | 0.839 |
| 162403_at   | 0.288 | 0.892 | 0.809 | 0.936 | 0.876 |
| 162404_i_at | 0.155 | 0.926 | 0.859 | 0.973 | 0.846 |
| 162405_at   | 0.397 | 0.967 | 0.932 | 1.027 | 0.938 |
| 162406_f_at | 0.315 | 0.886 | 0.839 | 0.933 | 0.872 |
| 162407_at   | 0.291 | 0.848 | 0.795 | 0.944 | 0.847 |
| 162408_f_at | 0.411 | 0.889 | 0.872 | 0.888 | 0.834 |
| 162409_r_at | 0.329 | 0.962 | 0.911 | 1.002 | 0.919 |
| 162410_s_at | 0.232 | 0.788 | 0.818 | 0.804 | 0.931 |
| 162411_f_at | 0.312 | 0.939 | 0.960 | 0.945 | 0.980 |
| 162412_r_at | 0.200 | 0.922 | 1.003 | 0.975 | 0.929 |
| 162413_r_at | 0.275 | 0.905 | 0.919 | 0.986 | 0.933 |
| 162414_f_at | 0.480 | 0.791 | 0.800 | 0.838 | 0.775 |
| 162415_f_at | 0.165 | 1.065 | 1.002 | 0.991 | 1.002 |
| 162416_at   | 0.345 | 0.910 | 0.853 | 0.951 | 0.898 |
| 162417_at   | 0.434 | 0.859 | 0.838 | 0.870 | 0.904 |
| 162418_r_at | 0.302 | 0.904 | 0.861 | 0.982 | 0.894 |
| 162419_r_at | 0.255 | 0.900 | 0.878 | 0.873 | 0.896 |
| 162420_r_at | 0.400 | 0.982 | 0.937 | 0.994 | 0.964 |
| 162421_r_at | 0.303 | 0.899 | 0.918 | 0.921 | 0.866 |
| 162422_r_at | 0.263 | 0.843 | 0.842 | 0.935 | 0.834 |
| 162423_f_at | 0.322 | 0.789 | 0.791 | 0.784 | 0.659 |
| 162424_f_at | 0.139 | 1.217 | 1.049 | 0.979 | 1.016 |
| 162425_f_at | 0.212 | 1.026 | 0.939 | 0.912 | 0.916 |
| 162426_f_at | 0.337 | 1.001 | 0.961 | 1.015 | 1.001 |
| 162427_r_at | 0.428 | 0.866 | 0.876 | 0.967 | 0.877 |
| 162428_i_at | 0.159 | 0.873 | 0.757 | 0.859 | 0.713 |
| 162429_r_at | 0.182 | 0.891 | 0.839 | 0.966 | 0.873 |
| 162430_at   | 0.346 | 1.132 | 1.108 | 1.093 | 1.062 |
| 162431_at   | 0.461 | 0.823 | 0.779 | 0.887 | 0.826 |
| 162432_f_at | 0.380 | 0.832 | 0.746 | 0.892 | 0.798 |
| 162433_f_at | 0.369 | 0.876 | 0.900 | 0.917 | 0.925 |
| 162434_i_at | 0.321 | 0.964 | 0.935 | 1.004 | 0.941 |
| 162435_f_at | 0.339 | 0.826 | 0.819 | 0.921 | 0.844 |
| 162436_at   | 0.390 | 0.869 | 0.918 | 0.941 | 0.872 |

|             |       |       |       |       |       |
|-------------|-------|-------|-------|-------|-------|
| 162437_at   | 0.293 | 1.019 | 1.058 | 1.054 | 1.026 |
| 162438_f_at | 0.325 | 0.970 | 0.975 | 0.993 | 1.005 |
| 162439_at   | 0.167 | 0.910 | 0.915 | 0.936 | 0.999 |
| 162440_r_at | 0.298 | 0.890 | 0.860 | 0.937 | 0.854 |
| 162441_i_at | 0.467 | 0.822 | 0.781 | 0.883 | 0.780 |
| 162442_r_at | 0.452 | 0.925 | 0.889 | 0.921 | 0.904 |
| 162443_at   | 0.438 | 0.909 | 0.891 | 0.971 | 0.903 |
| 162444_r_at | 0.396 | 0.870 | 0.815 | 0.829 | 0.845 |
| 162445_at   | 0.494 | 1.024 | 0.997 | 1.020 | 1.010 |
| 162446_at   | 0.474 | 1.016 | 1.029 | 1.054 | 1.029 |
| 162447_f_at | 0.351 | 0.939 | 0.931 | 0.986 | 0.971 |
| 162448_f_at | 0.349 | 0.949 | 0.863 | 0.970 | 0.908 |
| 162449_f_at | 0.356 | 0.985 | 1.010 | 0.938 | 0.940 |
| 162450_f_at | 0.374 | 0.959 | 0.929 | 0.990 | 0.884 |
| 162451_r_at | 0.401 | 0.985 | 0.952 | 0.946 | 0.947 |
| 162452_at   | 0.323 | 0.842 | 0.780 | 0.911 | 0.838 |
| 162453_at   | 0.291 | 0.988 | 0.896 | 1.016 | 0.956 |
| 162454_f_at | 0.219 | 0.946 | 1.034 | 1.039 | 0.968 |
| 162455_f_at | 0.207 | 0.963 | 0.946 | 0.963 | 0.897 |
| 162456_f_at | 0.465 | 0.851 | 0.793 | 0.875 | 0.828 |
| 162457_f_at | 0.298 | 0.997 | 0.919 | 0.960 | 0.998 |
| 162458_i_at | 0.383 | 0.807 | 0.765 | 0.863 | 0.802 |
| 162459_f_at | 0.387 | 1.217 | 1.561 | 1.195 | 1.245 |
| 162460_f_at | 0.193 | 1.207 | 1.102 | 1.058 | 1.277 |
| 162461_at   | 0.303 | 0.837 | 0.776 | 0.895 | 0.827 |
| 162462_r_at | 0.488 | 0.851 | 0.814 | 0.853 | 0.828 |
| 162463_at   | 0.280 | 0.896 | 0.799 | 0.894 | 0.879 |
| 162464_f_at | 0.490 | 0.904 | 0.881 | 0.937 | 0.859 |
| 162465_i_at | 0.328 | 0.922 | 0.866 | 0.922 | 0.929 |
| 162466_at   | 0.275 | 0.942 | 0.919 | 0.964 | 0.976 |
| 162467_r_at | 0.291 | 0.772 | 0.688 | 0.855 | 0.740 |
| 162468_at   | 0.305 | 0.903 | 0.864 | 0.946 | 0.961 |
| 162469_r_at | 0.250 | 0.883 | 0.857 | 0.979 | 0.879 |
| 162470_at   | 0.186 | 0.920 | 0.882 | 0.902 | 0.933 |
| 162471_i_at | 0.497 | 0.952 | 0.946 | 0.954 | 0.960 |
| 162472_f_at | 0.448 | 0.838 | 0.798 | 0.878 | 0.841 |
| 162473_r_at | 0.319 | 0.830 | 0.724 | 0.912 | 0.830 |
| 162474_f_at | 0.478 | 0.784 | 0.754 | 0.783 | 0.717 |
| 162475_f_at | 0.091 | 1.120 | 1.090 | 1.651 | 0.654 |
| 162476_r_at | 0.492 | 0.710 | 0.690 | 0.731 | 0.642 |
| 162477_r_at | 0.352 | 0.954 | 0.972 | 0.937 | 0.887 |
| 162478_r_at | 0.448 | 0.918 | 0.899 | 0.934 | 0.906 |
| 162479_f_at | 0.378 | 0.902 | 0.895 | 0.928 | 0.942 |
| 162480_f_at | 0.375 | 0.842 | 0.806 | 0.916 | 0.803 |
| 162481_f_at | 0.363 | 0.981 | 0.940 | 0.886 | 0.952 |
| 162482_at   | 0.308 | 1.028 | 1.010 | 1.068 | 0.991 |
| 162483_f_at | 0.422 | 0.878 | 0.885 | 0.931 | 0.855 |

|             |       |       |       |       |       |
|-------------|-------|-------|-------|-------|-------|
| 162484_r_at | 0.191 | 0.846 | 0.892 | 0.960 | 0.885 |
| 162485_at   | 0.232 | 1.000 | 1.015 | 0.990 | 0.943 |
| 162486_f_at | 0.292 | 1.175 | 1.132 | 0.950 | 1.269 |
| 162487_f_at | 0.264 | 0.883 | 0.837 | 0.968 | 0.885 |
| 162488_at   | 0.345 | 0.931 | 0.869 | 0.894 | 0.887 |
| 162489_i_at | 0.504 | 0.891 | 0.876 | 0.900 | 0.891 |
| 162490_f_at | 0.327 | 1.035 | 1.098 | 1.078 | 1.080 |
| 162491_f_at | 0.341 | 0.895 | 0.830 | 0.929 | 0.869 |
| 162492_at   | 0.355 | 0.821 | 0.755 | 0.869 | 0.837 |
| 162493_r_at | 0.392 | 0.856 | 0.806 | 0.918 | 0.756 |
| 162494_at   | 0.465 | 0.917 | 0.891 | 0.929 | 0.869 |
| 162495_r_at | 0.431 | 1.007 | 0.947 | 1.030 | 0.982 |
| 162496_r_at | 0.422 | 0.828 | 0.792 | 0.921 | 0.813 |
| 162497_r_at | 0.341 | 0.923 | 0.860 | 0.970 | 0.901 |
| 162498_r_at | 0.319 | 0.870 | 0.879 | 0.971 | 0.868 |
| 162499_f_at | 0.313 | 1.050 | 1.083 | 1.055 | 1.031 |
| 162500_f_at | 0.492 | 0.866 | 0.869 | 0.891 | 0.852 |
| 162501_at   | 0.276 | 0.952 | 0.834 | 0.996 | 1.003 |
| 162502_f_at | 0.276 | 0.906 | 0.884 | 0.995 | 0.950 |
| 162503_f_at | 0.428 | 0.944 | 0.958 | 0.957 | 0.971 |
| 162504_at   | 0.477 | 0.837 | 0.807 | 0.844 | 0.807 |
| 92180_at    | 0.488 | 1.110 | 1.076 | 1.073 | 1.105 |
| 92181_at    | 0.145 | 1.114 | 1.003 | 0.988 | 1.067 |
| 92182_at    | 0.379 | 1.072 | 1.025 | 1.024 | 1.050 |
| 92183_at    | 0.394 | 0.826 | 0.830 | 0.867 | 0.874 |
| 92184_at    | 0.219 | 0.916 | 0.940 | 1.004 | 0.945 |
| 92185_at    | 0.257 | 1.040 | 1.027 | 0.991 | 1.139 |
| 92186_at    | 0.461 | 1.023 | 0.984 | 1.002 | 0.995 |
| 92188_s_at  | 0.281 | 1.011 | 1.039 | 1.038 | 1.080 |
| 92189_at    | 0.185 | 0.982 | 1.122 | 0.995 | 1.079 |
| 92190_at    | 0.343 | 1.076 | 1.031 | 1.074 | 1.127 |
| 92191_at    | 0.385 | 1.078 | 1.135 | 1.004 | 1.133 |
| 92192_s_at  | 0.174 | 1.119 | 1.112 | 1.002 | 1.018 |
| 92193_r_at  | 0.244 | 0.893 | 0.862 | 0.993 | 1.000 |
| 92194_at    | 0.312 | 0.888 | 0.835 | 0.913 | 0.901 |
| 92195_at    | 0.212 | 1.033 | 1.026 | 0.963 | 1.139 |
| 92196_f_at  | 0.212 | 1.040 | 1.009 | 0.990 | 0.982 |
| 92197_r_at  | 0.178 | 0.887 | 0.873 | 0.996 | 0.785 |
| 92198_s_at  | 0.069 | 1.004 | 1.372 | 0.998 | 1.052 |
| 92199_at    | 0.458 | 0.810 | 0.838 | 0.866 | 0.837 |
| 92200_at    | 0.361 | 0.909 | 0.848 | 0.918 | 0.867 |
| 92201_at    | 0.360 | 0.822 | 0.825 | 0.905 | 0.946 |
| 92202_g_at  | 0.448 | 1.185 | 1.001 | 1.077 | 1.134 |
| 92203_s_at  | 0.382 | 0.892 | 0.951 | 0.917 | 0.940 |
| 92204_at    | 0.359 | 0.819 | 0.836 | 0.915 | 0.827 |
| 92205_at    | 0.165 | 0.896 | 0.814 | 0.949 | 0.874 |
| 92206_at    | 0.303 | 0.879 | 0.915 | 0.956 | 0.935 |

|            |       |       |       |       |       |
|------------|-------|-------|-------|-------|-------|
| 92207_at   | 0.126 | 0.872 | 0.840 | 1.137 | 0.983 |
| 92208_at   | 0.334 | 1.051 | 1.000 | 0.968 | 0.985 |
| 92209_at   | 0.306 | 0.899 | 0.908 | 0.992 | 0.893 |
| 92210_at   | 0.408 | 1.121 | 1.178 | 1.039 | 1.096 |
| 92211_at   | 0.436 | 1.051 | 1.044 | 1.009 | 1.137 |
| 92212_at   | 0.250 | 0.866 | 0.767 | 0.869 | 0.871 |
| 92213_at   | 0.362 | 0.893 | 0.828 | 0.942 | 0.873 |
| 92214_at   | 0.328 | 0.957 | 0.968 | 0.962 | 0.926 |
| 92215_at   | 0.290 | 0.831 | 0.846 | 0.930 | 0.834 |
| 92216_at   | 0.136 | 1.248 | 1.023 | 1.099 | 1.102 |
| 92217_s_at | 0.075 | 1.175 | 1.612 | 1.091 | 1.594 |
| 92218_at   | 0.264 | 0.926 | 0.895 | 0.973 | 0.951 |
| 92219_s_at | 0.328 | 0.916 | 0.857 | 0.916 | 0.826 |
| 92220_s_at | 0.305 | 0.992 | 1.103 | 1.004 | 1.097 |
| 92222_f_at | 0.075 | 1.026 | 0.866 | 0.907 | 0.943 |
| 92223_at   | 0.016 | 1.182 | 2.843 | 1.206 | 1.558 |
| 92224_at   | 0.250 | 0.991 | 1.154 | 1.061 | 1.148 |
| 92225_f_at | 0.233 | 0.857 | 0.773 | 0.888 | 0.902 |
| 92226_at   | 0.187 | 1.148 | 1.137 | 0.959 | 1.104 |
| 92227_s_at | 0.507 | 0.923 | 0.897 | 0.931 | 0.883 |
| 92228_at   | 0.480 | 0.908 | 0.898 | 0.921 | 0.928 |
| 92229_at   | 0.386 | 0.818 | 0.787 | 0.848 | 0.748 |
| 92230_at   | 0.108 | 1.010 | 0.944 | 1.004 | 1.046 |
| 92231_at   | 0.368 | 0.929 | 0.858 | 0.943 | 0.884 |
| 92232_at   | 0.064 | 0.925 | 1.058 | 1.045 | 0.885 |
| 92233_at   | 0.189 | 1.316 | 1.304 | 1.030 | 1.302 |
| 92234_at   | 0.133 | 0.841 | 0.821 | 1.012 | 0.849 |
| 92235_g_at | 0.331 | 0.869 | 0.829 | 0.947 | 0.864 |
| 92237_at   | 0.106 | 0.838 | 0.837 | 0.961 | 0.834 |
| 92238_at   | 0.307 | 0.844 | 0.816 | 0.933 | 0.843 |
| 92239_at   | 0.474 | 0.836 | 0.777 | 0.875 | 0.828 |
| 92240_at   | 0.463 | 0.822 | 0.787 | 0.869 | 0.801 |
| 92241_at   | 0.232 | 1.208 | 1.105 | 1.106 | 0.978 |
| 92242_at   | 0.492 | 0.800 | 0.768 | 0.836 | 0.770 |
| 92243_at   | 0.353 | 1.105 | 1.041 | 1.023 | 1.041 |
| 92244_at   | 0.323 | 0.887 | 0.901 | 0.982 | 0.898 |
| 92245_at   | 0.332 | 0.826 | 0.820 | 0.914 | 0.825 |
| 92246_at   | 0.345 | 0.896 | 0.898 | 0.954 | 0.824 |
| 92247_at   | 0.308 | 0.898 | 0.893 | 0.911 | 1.067 |
| 92248_at   | 0.117 | 0.858 | 0.830 | 0.962 | 0.866 |
| 92249_g_at | 0.445 | 0.934 | 0.949 | 0.957 | 0.924 |
| 92250_s_at | 0.265 | 1.046 | 0.939 | 1.067 | 0.980 |
| 92251_f_at | 0.355 | 1.116 | 1.056 | 1.066 | 1.033 |
| 92252_at   | 0.225 | 1.421 | 1.346 | 1.071 | 1.298 |
| 92253_at   | 0.337 | 0.871 | 0.801 | 0.904 | 0.869 |
| 92254_at   | 0.244 | 1.091 | 1.070 | 0.964 | 1.137 |
| 92255_at   | 0.171 | 0.928 | 0.858 | 0.956 | 0.912 |



|            |       |       |       |       |       |
|------------|-------|-------|-------|-------|-------|
| 92256_at   | 0.084 | 1.036 | 1.248 | 1.040 | 1.178 |
| 92257_at   | 0.332 | 1.288 | 1.217 | 1.066 | 1.288 |
| 92258_at   | 0.377 | 0.878 | 0.831 | 0.904 | 0.862 |
| 92259_at   | 0.255 | 0.907 | 0.868 | 0.972 | 0.905 |
| 92260_at   | 0.328 | 0.923 | 0.798 | 0.883 | 0.873 |
| 92261_at   | 0.445 | 0.948 | 0.928 | 0.996 | 0.943 |
| 92262_at   | 0.349 | 1.130 | 1.154 | 1.083 | 1.059 |
| 92263_at   | 0.218 | 1.032 | 1.002 | 1.079 | 0.949 |
| 92264_at   | 0.293 | 0.799 | 0.753 | 0.886 | 0.796 |
| 92265_f_at | 0.074 | 1.073 | 0.991 | 0.927 | 1.162 |
| 92266_at   | 0.307 | 0.818 | 0.708 | 0.868 | 0.716 |
| 92267_at   | 0.184 | 0.775 | 0.851 | 0.925 | 0.949 |
| 92268_at   | 0.167 | 1.192 | 1.121 | 1.040 | 1.191 |
| 92269_r_at | 0.339 | 0.947 | 0.984 | 0.991 | 0.948 |
| 92270_at   | 0.342 | 0.903 | 0.843 | 0.942 | 0.884 |
| 92271_at   | 0.246 | 0.921 | 0.842 | 0.937 | 0.958 |
| 92272_at   | 0.264 | 1.101 | 1.016 | 1.013 | 1.000 |
| 92273_at   | 0.159 | 0.989 | 1.047 | 0.926 | 1.027 |
| 92274_at   | 0.285 | 0.864 | 0.896 | 0.902 | 0.897 |
| 92275_at   | 0.325 | 0.857 | 0.802 | 0.927 | 0.873 |
| 92276_at   | 0.330 | 0.881 | 0.854 | 1.034 | 0.838 |
| 92277_at   | 0.317 | 1.064 | 0.949 | 0.967 | 0.952 |
| 92278_at   | 0.273 | 0.992 | 0.930 | 0.987 | 0.917 |
| 92279_at   | 0.445 | 0.955 | 0.953 | 0.956 | 0.966 |
| 92280_at   | 0.094 | 1.136 | 1.196 | 1.280 | 1.012 |
| 92281_at   | 0.484 | 1.015 | 0.968 | 1.017 | 0.991 |
| 92282_at   | 0.387 | 1.288 | 1.268 | 1.130 | 1.410 |
| 92283_s_at | 0.486 | 0.962 | 0.981 | 0.974 | 0.961 |
| 92284_r_at | 0.408 | 0.881 | 0.869 | 0.869 | 0.865 |
| 92285_at   | 0.444 | 0.937 | 0.892 | 0.970 | 0.904 |
| 92286_g_at | 0.376 | 0.917 | 0.949 | 0.961 | 0.939 |
| 92287_at   | 0.357 | 0.886 | 0.874 | 0.982 | 0.880 |
| 92288_at   | 0.159 | 0.761 | 0.951 | 0.951 | 0.974 |
| 92289_at   | 0.262 | 1.093 | 0.898 | 0.896 | 1.100 |
| 92290_at   | 0.377 | 0.952 | 0.946 | 0.926 | 0.998 |
| 92291_f_at | 0.308 | 0.974 | 1.085 | 1.012 | 1.211 |
| 92292_at   | 0.444 | 0.827 | 0.813 | 0.904 | 0.803 |
| 92293_at   | 0.249 | 0.905 | 0.926 | 0.942 | 1.083 |
| 92294_at   | 0.328 | 0.977 | 1.035 | 0.997 | 1.153 |
| 92295_at   | 0.266 | 1.089 | 1.061 | 0.999 | 1.150 |
| 92296_at   | 0.106 | 0.968 | 1.018 | 1.099 | 1.030 |
| 92299_at   | 0.449 | 0.862 | 0.870 | 0.906 | 0.886 |
| 92300_at   | 0.266 | 1.070 | 0.994 | 0.983 | 0.958 |
| 92301_at   | 0.400 | 0.834 | 0.808 | 0.875 | 0.855 |
| 92302_at   | 0.245 | 1.363 | 1.244 | 1.094 | 1.298 |
| 92303_at   | 0.022 | 0.894 | 0.759 | 0.925 | 0.845 |
| 92304_at   | 0.370 | 1.038 | 1.062 | 0.954 | 1.130 |

|            |       |       |       |       |       |
|------------|-------|-------|-------|-------|-------|
| 92305_s_at | 0.505 | 0.920 | 0.886 | 0.923 | 0.880 |
| 92306_at   | 0.303 | 0.902 | 0.853 | 0.917 | 0.941 |
| 92307_at   | 0.434 | 0.891 | 0.819 | 0.935 | 0.878 |
| 92308_at   | 0.364 | 1.305 | 1.192 | 1.105 | 1.388 |
| 92309_i_at | 0.244 | 1.019 | 1.025 | 0.966 | 1.267 |
| 92310_at   | 0.337 | 0.992 | 0.954 | 0.952 | 0.938 |
| 92311_s_at | 0.137 | 0.882 | 0.906 | 0.986 | 0.975 |
| 92312_at   | 0.052 | 0.937 | 0.988 | 1.062 | 1.056 |
| 92313_at   | 0.495 | 0.813 | 0.769 | 0.818 | 0.767 |
| 92314_at   | 0.313 | 0.847 | 0.798 | 0.914 | 0.856 |
| 92315_at   | 0.155 | 1.076 | 0.943 | 1.030 | 1.072 |
| 92316_f_at | 0.006 | 1.021 | 2.432 | 0.672 | 0.949 |
| 92317_at   | 0.275 | 0.938 | 0.895 | 0.994 | 0.910 |
| 92318_at   | 0.244 | 0.965 | 0.890 | 0.926 | 0.940 |
| 92319_i_at | 0.298 | 0.775 | 0.751 | 0.854 | 0.781 |
| 92320_f_at | 0.391 | 0.860 | 0.829 | 0.912 | 0.867 |
| 92321_r_at | 0.347 | 0.874 | 0.842 | 0.941 | 0.858 |
| 92322_at   | 0.291 | 0.797 | 0.804 | 0.924 | 0.799 |
| 92323_at   | 0.165 | 1.037 | 0.932 | 0.979 | 0.963 |
| 92324_at   | 0.380 | 0.907 | 0.877 | 0.943 | 0.949 |
| 92325_at   | 0.500 | 0.934 | 0.919 | 0.948 | 0.933 |
| 92328_at   | 0.337 | 0.901 | 0.940 | 0.979 | 0.937 |
| 92329_at   | 0.277 | 0.839 | 0.747 | 0.890 | 0.848 |
| 92330_r_at | 0.483 | 0.732 | 0.737 | 0.767 | 0.668 |
| 92331_at   | 0.196 | 0.790 | 0.909 | 0.987 | 1.061 |
| 92332_at   | 0.428 | 0.935 | 0.929 | 0.975 | 0.936 |
| 92333_at   | 0.374 | 0.895 | 0.925 | 0.917 | 0.924 |
| 92334_at   | 0.478 | 0.863 | 0.792 | 0.876 | 0.826 |
| 92335_at   | 0.120 | 1.028 | 0.844 | 1.027 | 1.043 |
| 92336_at   | 0.444 | 0.848 | 0.802 | 0.917 | 0.801 |
| 92337_g_at | 0.371 | 0.854 | 0.773 | 0.842 | 0.777 |
| 92338_f_at | 0.407 | 1.050 | 1.071 | 1.003 | 1.138 |
| 92339_at   | 0.184 | 1.009 | 0.889 | 0.961 | 0.932 |
| 92340_at   | 0.484 | 0.751 | 0.737 | 0.800 | 0.740 |
| 92341_at   | 0.246 | 0.946 | 0.916 | 1.160 | 0.863 |
| 92342_at   | 0.483 | 0.846 | 0.854 | 0.891 | 0.853 |
| 92343_at   | 0.427 | 0.899 | 0.896 | 0.935 | 0.928 |
| 92344_at   | 0.456 | 0.826 | 0.831 | 0.867 | 0.850 |
| 92345_g_at | 0.206 | 0.828 | 0.913 | 0.923 | 0.970 |
| 92346_at   | 0.330 | 0.865 | 0.797 | 0.963 | 0.874 |
| 92347_at   | 0.312 | 0.967 | 0.895 | 0.977 | 0.958 |
| 92348_at   | 0.109 | 1.069 | 0.922 | 1.059 | 0.942 |
| 92349_at   | 0.461 | 0.860 | 0.835 | 0.906 | 0.812 |
| 92350_at   | 0.290 | 1.269 | 1.225 | 1.100 | 1.111 |
| 92351_at   | 0.472 | 0.915 | 0.894 | 0.898 | 0.901 |
| 92352_at   | 0.219 | 0.817 | 0.813 | 0.944 | 0.896 |
| 92353_at   | 0.198 | 0.936 | 0.821 | 0.973 | 0.850 |

|            |       |       |       |       |       |
|------------|-------|-------|-------|-------|-------|
| 92354_at   | 0.241 | 0.850 | 0.900 | 0.959 | 0.878 |
| 92355_at   | 0.383 | 0.970 | 0.886 | 1.010 | 0.899 |
| 92356_at   | 0.051 | 0.997 | 1.205 | 0.941 | 1.159 |
| 92357_at   | 0.505 | 0.854 | 0.809 | 0.886 | 0.806 |
| 92358_at   | 0.365 | 0.878 | 0.778 | 0.913 | 0.839 |
| 92359_at   | 0.328 | 0.814 | 0.890 | 0.893 | 0.820 |
| 92360_at   | 0.284 | 1.190 | 1.254 | 1.070 | 1.276 |
| 92361_at   | 0.480 | 0.880 | 0.865 | 0.872 | 0.846 |
| 92362_at   | 0.428 | 0.913 | 0.921 | 0.955 | 0.939 |
| 92363_at   | 0.249 | 0.884 | 0.796 | 0.921 | 0.842 |
| 92364_at   | 0.278 | 0.899 | 0.880 | 0.931 | 0.834 |
| 92365_at   | 0.099 | 1.281 | 1.108 | 1.371 | 0.967 |
| 92366_at   | 0.125 | 1.052 | 0.871 | 1.100 | 0.975 |
| 92367_at   | 0.507 | 0.819 | 0.816 | 0.831 | 0.803 |
| 92368_at   | 0.354 | 0.934 | 0.973 | 0.982 | 0.965 |
| 92369_at   | 0.160 | 1.117 | 0.986 | 1.122 | 1.037 |
| 92370_at   | 0.481 | 0.903 | 0.860 | 0.936 | 0.878 |
| 92371_at   | 0.316 | 0.905 | 0.783 | 0.978 | 0.850 |
| 92372_at   | 0.379 | 0.973 | 1.021 | 1.039 | 1.034 |
| 92374_at   | 0.109 | 1.053 | 0.977 | 1.099 | 1.020 |
| 92375_at   | 0.219 | 1.265 | 1.345 | 1.124 | 1.282 |
| 92376_at   | 0.077 | 1.057 | 1.009 | 0.962 | 1.071 |
| 92377_at   | 0.161 | 1.098 | 1.026 | 1.078 | 0.946 |
| 92378_at   | 0.243 | 0.906 | 0.809 | 0.979 | 0.804 |
| 92379_f_at | 0.105 | 0.999 | 0.907 | 1.010 | 0.937 |
| 92380_r_at | 0.475 | 0.951 | 0.948 | 0.953 | 0.929 |
| 92381_at   | 0.140 | 0.886 | 0.942 | 1.064 | 0.967 |
| 92382_at   | 0.267 | 0.863 | 0.878 | 0.902 | 0.978 |
| 92383_at   | 0.297 | 0.963 | 1.072 | 0.972 | 1.079 |
| 92384_at   | 0.238 | 1.030 | 1.077 | 0.980 | 1.126 |
| 92385_at   | 0.497 | 0.871 | 0.829 | 0.883 | 0.845 |
| 92386_at   | 0.330 | 0.952 | 0.930 | 0.964 | 0.916 |
| 92387_at   | 0.040 | 0.904 | 1.091 | 0.924 | 1.121 |
| 92388_at   | 0.291 | 0.919 | 0.917 | 0.979 | 0.907 |
| 92389_at   | 0.441 | 0.864 | 0.868 | 0.948 | 0.870 |
| 92390_at   | 0.322 | 0.879 | 0.949 | 0.960 | 0.941 |
| 92391_at   | 0.318 | 0.920 | 0.965 | 0.997 | 0.968 |
| 92392_at   | 0.384 | 1.042 | 1.020 | 1.025 | 1.052 |
| 92393_at   | 0.323 | 0.878 | 0.888 | 0.951 | 0.925 |
| 92394_f_at | 0.109 | 1.079 | 1.024 | 1.003 | 0.913 |
| 92395_r_at | 0.330 | 0.920 | 0.886 | 0.967 | 0.840 |
| 92396_at   | 0.499 | 0.849 | 0.844 | 0.869 | 0.819 |
| 92397_at   | 0.163 | 1.171 | 1.008 | 1.058 | 1.015 |
| 92398_at   | 0.051 | 1.002 | 0.926 | 0.988 | 0.899 |
| 92399_at   | 0.125 | 0.858 | 0.946 | 1.046 | 1.008 |
| 92400_at   | 0.330 | 0.916 | 0.913 | 0.940 | 0.935 |
| 92401_at   | 0.119 | 0.926 | 1.070 | 0.998 | 1.164 |

|            |       |       |       |       |       |
|------------|-------|-------|-------|-------|-------|
| 92402_at   | 0.302 | 0.858 | 0.917 | 0.876 | 0.985 |
| 92403_at   | 0.294 | 0.936 | 0.892 | 0.980 | 0.938 |
| 92404_at   | 0.285 | 0.803 | 0.811 | 0.952 | 0.792 |
| 92405_at   | 0.379 | 0.845 | 0.793 | 0.893 | 0.850 |
| 92406_at   | 0.183 | 0.871 | 0.939 | 0.873 | 0.925 |
| 92407_at   | 0.350 | 1.102 | 0.993 | 1.161 | 1.041 |
| 92408_at   | 0.262 | 1.305 | 1.138 | 1.056 | 1.210 |
| 92409_at   | 0.248 | 1.029 | 1.050 | 1.007 | 1.145 |
| 92410_at   | 0.376 | 0.969 | 0.959 | 1.091 | 0.931 |
| 92411_at   | 0.228 | 1.043 | 0.977 | 1.045 | 0.976 |
| 92412_s_at | 0.477 | 0.978 | 0.967 | 1.009 | 0.989 |
| 92413_at   | 0.383 | 0.941 | 0.945 | 1.005 | 0.898 |
| 92414_at   | 0.145 | 0.926 | 0.887 | 0.972 | 0.922 |
| 92415_at   | 0.484 | 0.935 | 0.901 | 0.954 | 0.920 |
| 92416_at   | 0.410 | 0.903 | 0.910 | 0.983 | 0.928 |
| 92417_at   | 0.427 | 0.846 | 0.847 | 0.892 | 0.875 |
| 92418_at   | 0.317 | 0.965 | 0.934 | 1.047 | 0.956 |
| 92419_at   | 0.238 | 0.944 | 0.850 | 0.995 | 0.902 |
| 92420_at   | 0.068 | 0.924 | 0.833 | 1.027 | 0.932 |
| 92421_at   | 0.369 | 0.980 | 0.928 | 0.986 | 0.957 |
| 92422_at   | 0.361 | 0.805 | 0.773 | 0.866 | 0.844 |
| 92423_at   | 0.282 | 1.002 | 0.924 | 0.926 | 0.950 |
| 92424_at   | 0.302 | 1.106 | 0.979 | 1.073 | 1.003 |
| 92425_at   | 0.407 | 0.870 | 0.891 | 0.927 | 0.928 |
| 92426_at   | 0.048 | 0.837 | 0.916 | 0.958 | 0.983 |
| 92427_at   | 0.272 | 0.913 | 0.949 | 1.063 | 1.063 |
| 92428_at   | 0.330 | 1.013 | 1.107 | 1.158 | 1.053 |
| 92429_at   | 0.269 | 0.880 | 0.824 | 0.947 | 0.932 |
| 92430_at   | 0.431 | 0.913 | 0.941 | 0.951 | 0.926 |
| 92432_at   | 0.165 | 0.967 | 0.936 | 1.009 | 0.895 |
| 92433_at   | 0.424 | 0.852 | 0.798 | 0.904 | 0.820 |
| 92434_at   | 0.406 | 0.819 | 0.805 | 0.879 | 0.861 |
| 92435_at   | 0.505 | 0.839 | 0.813 | 0.870 | 0.825 |
| 92436_at   | 0.381 | 0.899 | 0.849 | 0.917 | 0.881 |
| 92437_at   | 0.398 | 0.910 | 0.930 | 0.991 | 0.887 |
| 92439_at   | 0.445 | 0.864 | 0.818 | 0.905 | 0.871 |
| 92440_at   | 0.440 | 1.166 | 1.100 | 1.089 | 1.118 |
| 92441_at   | 0.290 | 0.931 | 0.911 | 1.011 | 0.932 |
| 92442_at   | 0.397 | 0.863 | 0.808 | 0.902 | 0.833 |
| 92443_i_at | 0.384 | 1.027 | 0.938 | 1.054 | 0.982 |
| 92444_f_at | 0.264 | 0.965 | 0.982 | 1.021 | 0.969 |
| 92445_at   | 0.475 | 0.957 | 0.931 | 1.009 | 0.943 |
| 92448_s_at | 0.117 | 0.785 | 0.829 | 0.950 | 0.854 |
| 92449_at   | 0.274 | 0.988 | 1.176 | 1.198 | 1.103 |
| 92450_at   | 0.231 | 1.178 | 1.101 | 1.075 | 1.122 |
| 92451_at   | 0.355 | 0.849 | 0.897 | 0.956 | 0.890 |
| 92452_at   | 0.210 | 0.989 | 0.925 | 0.970 | 1.053 |

|            |       |       |        |       |       |
|------------|-------|-------|--------|-------|-------|
| 92453_at   | 0.368 | 0.953 | 0.998  | 0.956 | 0.933 |
| 92454_at   | 0.449 | 0.952 | 0.960  | 1.006 | 0.919 |
| 92455_at   | 0.461 | 0.940 | 0.914  | 0.969 | 0.945 |
| 92456_at   | 0.307 | 1.021 | 0.940  | 0.944 | 0.940 |
| 92457_at   | 0.411 | 0.898 | 0.921  | 0.897 | 0.870 |
| 92458_at   | 0.246 | 0.907 | 0.858  | 0.914 | 0.919 |
| 92459_at   | 0.010 | 1.101 | 13.416 | 1.014 | 2.664 |
| 92460_at   | 0.137 | 0.996 | 0.863  | 0.959 | 0.946 |
| 92461_at   | 0.467 | 0.851 | 0.840  | 0.906 | 0.858 |
| 92462_at   | 0.390 | 0.944 | 0.954  | 0.940 | 0.903 |
| 92464_at   | 0.331 | 0.885 | 0.887  | 0.975 | 0.918 |
| 92465_at   | 0.181 | 0.923 | 0.949  | 0.994 | 0.980 |
| 92466_at   | 0.184 | 0.888 | 0.829  | 0.964 | 0.898 |
| 92467_g_at | 0.237 | 0.949 | 0.976  | 1.056 | 0.975 |
| 92468_at   | 0.238 | 0.941 | 0.902  | 1.007 | 0.923 |
| 92469_at   | 0.297 | 0.896 | 0.896  | 0.982 | 0.903 |
| 92470_f_at | 0.153 | 0.898 | 1.672  | 0.941 | 0.918 |
| 92471_i_at | 0.091 | 0.974 | 1.282  | 0.882 | 1.153 |
| 92472_f_at | 0.064 | 1.023 | 1.340  | 0.898 | 1.280 |
| 92473_at   | 0.051 | 0.861 | 0.891  | 1.048 | 0.805 |
| 92474_at   | 0.308 | 1.170 | 1.116  | 1.072 | 1.214 |
| 92475_g_at | 0.389 | 1.002 | 1.042  | 1.035 | 1.079 |
| 92476_at   | 0.337 | 0.816 | 0.815  | 0.893 | 0.857 |
| 92477_at   | 0.190 | 0.834 | 0.892  | 0.974 | 1.005 |
| 92478_at   | 0.508 | 1.033 | 1.036  | 1.017 | 1.058 |
| 92480_f_at | 0.477 | 1.045 | 1.092  | 1.008 | 1.082 |
| 92481_at   | 0.093 | 0.934 | 0.860  | 1.089 | 0.910 |
| 92482_at   | 0.344 | 0.821 | 0.807  | 0.938 | 0.832 |
| 92483_g_at | 0.350 | 0.855 | 0.875  | 0.997 | 0.863 |
| 92484_at   | 0.342 | 1.016 | 1.081  | 1.078 | 1.130 |
| 92485_at   | 0.291 | 0.908 | 0.841  | 0.974 | 0.886 |
| 92486_at   | 0.288 | 0.949 | 0.915  | 0.903 | 0.927 |
| 92487_at   | 0.216 | 1.166 | 0.944  | 1.074 | 1.068 |
| 92488_at   | 0.496 | 1.080 | 1.075  | 1.049 | 1.077 |
| 92489_at   | 0.330 | 0.913 | 0.982  | 0.897 | 0.996 |
| 92490_at   | 0.137 | 0.932 | 0.844  | 0.994 | 0.907 |
| 92492_at   | 0.344 | 0.846 | 0.944  | 0.980 | 1.030 |
| 92493_at   | 0.397 | 0.890 | 0.830  | 0.932 | 0.854 |
| 92494_at   | 0.418 | 0.834 | 0.813  | 0.844 | 0.890 |
| 92495_at   | 0.492 | 0.872 | 0.861  | 0.911 | 0.875 |
| 92496_at   | 0.140 | 1.098 | 1.030  | 0.959 | 1.021 |
| 92497_at   | 0.303 | 0.861 | 0.825  | 0.946 | 0.840 |
| 92498_at   | 0.246 | 1.035 | 0.981  | 1.025 | 0.974 |
| 92499_at   | 0.454 | 0.899 | 0.862  | 0.950 | 0.897 |
| 92500_at   | 0.236 | 0.855 | 0.858  | 0.932 | 0.900 |
| 92501_s_at | 0.272 | 0.937 | 0.928  | 1.003 | 0.950 |
| 92502_at   | 0.343 | 1.005 | 0.963  | 1.047 | 1.066 |

|            |       |       |       |       |       |
|------------|-------|-------|-------|-------|-------|
| 92503_at   | 0.353 | 1.080 | 1.067 | 1.041 | 1.134 |
| 92504_at   | 0.380 | 0.878 | 0.900 | 0.922 | 0.935 |
| 92505_g_at | 0.380 | 0.896 | 0.922 | 0.922 | 0.929 |
| 92506_at   | 0.458 | 0.921 | 0.906 | 0.963 | 0.911 |
| 92507_at   | 0.238 | 0.769 | 0.886 | 0.921 | 0.925 |
| 92508_s_at | 0.320 | 0.815 | 0.845 | 0.952 | 0.905 |
| 92509_at   | 0.495 | 0.912 | 0.896 | 0.947 | 0.912 |
| 92510_at   | 0.069 | 0.944 | 0.804 | 0.978 | 0.898 |
| 92511_at   | 0.216 | 0.840 | 0.789 | 0.946 | 0.835 |
| 92512_g_at | 0.461 | 0.884 | 0.880 | 0.935 | 0.889 |
| 92513_at   | 0.369 | 1.005 | 1.028 | 0.976 | 1.109 |
| 92514_at   | 0.390 | 0.846 | 0.797 | 0.901 | 0.841 |
| 92515_at   | 0.366 | 0.848 | 0.837 | 0.921 | 0.854 |
| 92516_at   | 0.146 | 0.738 | 0.823 | 0.899 | 0.846 |
| 92517_at   | 0.220 | 0.929 | 0.890 | 0.962 | 0.970 |
| 92518_at   | 0.275 | 0.929 | 0.892 | 0.954 | 0.991 |
| 92519_at   | 0.311 | 0.966 | 0.923 | 0.930 | 0.983 |
| 92520_at   | 0.452 | 0.807 | 0.790 | 0.867 | 0.807 |
| 92521_at   | 0.394 | 1.008 | 0.908 | 0.998 | 0.954 |
| 92522_at   | 0.413 | 0.848 | 0.809 | 0.924 | 0.847 |
| 92523_at   | 0.367 | 0.901 | 0.836 | 0.906 | 0.897 |
| 92524_at   | 0.379 | 0.896 | 0.884 | 0.972 | 0.880 |
| 92525_i_at | 0.330 | 0.914 | 0.926 | 0.923 | 0.878 |
| 92526_f_at | 0.394 | 1.249 | 1.191 | 1.125 | 1.150 |
| 92527_at   | 0.316 | 1.082 | 1.018 | 0.996 | 1.041 |
| 92528_at   | 0.425 | 0.885 | 0.873 | 0.954 | 0.839 |
| 92529_s_at | 0.147 | 0.781 | 0.819 | 0.909 | 0.795 |
| 92531_at   | 0.142 | 1.122 | 1.007 | 1.037 | 1.138 |
| 92532_at   | 0.452 | 1.011 | 0.975 | 0.987 | 0.973 |
| 92533_at   | 0.355 | 0.829 | 0.866 | 0.887 | 0.894 |
| 92534_at   | 0.201 | 1.060 | 1.029 | 1.112 | 1.168 |
| 92535_at   | 0.239 | 0.937 | 0.964 | 1.105 | 1.023 |
| 92536_at   | 0.171 | 0.899 | 0.842 | 1.171 | 0.831 |
| 92537_g_at | 0.176 | 0.943 | 0.813 | 1.158 | 0.857 |
| 92538_at   | 0.292 | 0.910 | 0.878 | 1.028 | 0.872 |
| 92539_at   | 0.314 | 1.003 | 0.984 | 0.970 | 1.103 |
| 92540_f_at | 0.263 | 0.869 | 0.953 | 0.944 | 0.896 |
| 92541_at   | 0.286 | 0.858 | 0.675 | 1.151 | 0.745 |
| 92542_at   | 0.241 | 1.460 | 1.328 | 1.121 | 1.306 |
| 92543_at   | 0.452 | 0.885 | 0.905 | 0.943 | 0.884 |
| 92544_f_at | 0.175 | 1.265 | 1.376 | 1.061 | 1.241 |
| 92545_f_at | 0.311 | 0.833 | 0.804 | 0.928 | 0.817 |
| 92546_r_at | 0.354 | 0.788 | 0.749 | 0.882 | 0.799 |
| 92547_at   | 0.127 | 1.145 | 1.132 | 1.033 | 1.129 |
| 92548_g_at | 0.260 | 0.950 | 0.908 | 0.968 | 0.986 |
| 92549_at   | 0.342 | 1.146 | 1.153 | 1.054 | 1.126 |
| 92550_at   | 0.334 | 1.395 | 1.269 | 1.284 | 1.267 |

|            |       |       |       |       |       |
|------------|-------|-------|-------|-------|-------|
| 92551_at   | 0.276 | 0.999 | 1.060 | 0.986 | 1.001 |
| 92553_at   | 0.273 | 1.040 | 1.147 | 1.028 | 1.178 |
| 92554_at   | 0.235 | 1.181 | 1.199 | 1.027 | 1.097 |
| 92555_at   | 0.174 | 1.205 | 1.023 | 1.118 | 1.194 |
| 92556_at   | 0.391 | 0.870 | 0.806 | 0.886 | 0.813 |
| 92557_at   | 0.398 | 0.813 | 0.762 | 0.869 | 0.813 |
| 92558_at   | 0.175 | 1.270 | 1.486 | 1.007 | 1.432 |
| 92559_at   | 0.102 | 1.192 | 1.733 | 1.112 | 1.345 |
| 92560_g_at | 0.035 | 0.812 | 1.111 | 0.897 | 1.071 |
| 92561_at   | 0.154 | 1.017 | 0.958 | 1.148 | 0.979 |
| 92562_at   | 0.144 | 1.167 | 1.042 | 1.058 | 1.014 |
| 92563_at   | 0.386 | 0.950 | 0.860 | 0.942 | 0.902 |
| 92564_at   | 0.187 | 1.416 | 1.314 | 1.049 | 1.614 |
| 92565_at   | 0.170 | 1.117 | 1.210 | 0.940 | 1.117 |
| 92566_at   | 0.380 | 0.905 | 0.877 | 0.896 | 0.925 |
| 92567_at   | 0.279 | 1.120 | 1.407 | 1.158 | 1.190 |
| 92568_at   | 0.494 | 1.072 | 1.143 | 1.074 | 1.152 |
| 92569_f_at | 0.165 | 1.081 | 1.077 | 0.944 | 1.024 |
| 92570_at   | 0.495 | 0.814 | 0.802 | 0.848 | 0.777 |
| 92571_at   | 0.274 | 1.121 | 1.227 | 1.030 | 1.167 |
| 92572_at   | 0.508 | 1.030 | 1.049 | 1.015 | 1.039 |
| 92573_at   | 0.119 | 1.115 | 1.097 | 1.054 | 1.067 |
| 92574_at   | 0.403 | 1.115 | 1.278 | 1.115 | 1.182 |
| 92575_at   | 0.219 | 0.914 | 0.968 | 0.892 | 0.924 |
| 92577_f_at | 0.124 | 0.998 | 1.010 | 0.901 | 1.108 |
| 92578_at   | 0.320 | 1.098 | 1.129 | 0.977 | 1.132 |
| 92579_at   | 0.422 | 1.379 | 1.344 | 1.122 | 1.434 |
| 92580_at   | 0.384 | 1.172 | 1.255 | 1.094 | 1.273 |
| 92581_at   | 0.274 | 1.119 | 0.995 | 1.319 | 1.037 |
| 92582_at   | 0.374 | 1.037 | 0.968 | 1.158 | 0.994 |
| 92583_at   | 0.399 | 0.854 | 0.821 | 0.921 | 0.839 |
| 92584_at   | 0.107 | 0.905 | 0.918 | 0.994 | 0.952 |
| 92585_at   | 0.472 | 1.038 | 1.059 | 1.025 | 1.076 |
| 92586_at   | 0.328 | 1.226 | 1.180 | 1.075 | 1.327 |
| 92587_at   | 0.035 | 1.328 | 1.657 | 1.078 | 1.387 |
| 92589_at   | 0.252 | 0.949 | 0.929 | 1.011 | 1.019 |
| 92590_at   | 0.349 | 0.831 | 0.771 | 0.868 | 0.798 |
| 92592_at   | 0.250 | 0.866 | 0.802 | 1.315 | 0.768 |
| 92593_at   | 0.440 | 1.107 | 1.290 | 1.026 | 1.210 |
| 92594_at   | 0.461 | 0.863 | 0.871 | 0.928 | 0.821 |
| 92595_r_at | 0.402 | 1.024 | 0.990 | 1.041 | 1.039 |
| 92596_at   | 0.494 | 1.047 | 1.017 | 0.989 | 1.013 |
| 92597_s_at | 0.375 | 1.095 | 1.195 | 1.050 | 1.255 |
| 92598_at   | 0.103 | 1.181 | 1.224 | 0.994 | 1.280 |
| 92599_at   | 0.422 | 0.874 | 0.754 | 1.027 | 0.757 |
| 92600_f_at | 0.467 | 1.000 | 0.971 | 1.035 | 0.982 |
| 92601_at   | 0.440 | 0.952 | 0.914 | 1.006 | 0.922 |

|            |       |       |       |       |       |
|------------|-------|-------|-------|-------|-------|
| 92602_at   | 0.449 | 0.866 | 0.825 | 0.906 | 0.850 |
| 92603_at   | 0.314 | 1.250 | 1.374 | 1.143 | 1.262 |
| 92605_at   | 0.264 | 0.945 | 0.918 | 0.965 | 1.002 |
| 92606_at   | 0.196 | 1.014 | 0.968 | 1.131 | 0.997 |
| 92607_at   | 0.256 | 1.101 | 1.005 | 0.985 | 1.200 |
| 92608_at   | 0.478 | 1.078 | 1.123 | 1.030 | 1.101 |
| 92610_at   | 0.245 | 1.138 | 1.089 | 1.054 | 1.040 |
| 92611_at   | 0.363 | 1.065 | 1.177 | 0.943 | 1.116 |
| 92612_at   | 0.477 | 0.865 | 0.821 | 0.857 | 0.813 |
| 92614_at   | 0.228 | 1.015 | 0.879 | 0.885 | 0.995 |
| 92615_at   | 0.344 | 0.887 | 0.939 | 0.917 | 1.014 |
| 92616_at   | 0.470 | 1.106 | 1.175 | 1.041 | 1.125 |
| 92617_at   | 0.293 | 0.850 | 0.864 | 0.924 | 0.933 |
| 92618_at   | 0.183 | 0.974 | 1.041 | 0.967 | 1.113 |
| 92619_at   | 0.053 | 0.884 | 0.889 | 0.989 | 0.907 |
| 92621_at   | 0.239 | 1.195 | 1.146 | 1.077 | 1.117 |
| 92622_at   | 0.507 | 1.060 | 1.058 | 1.042 | 1.084 |
| 92623_at   | 0.290 | 1.082 | 1.056 | 1.017 | 1.012 |
| 92624_r_at | 0.365 | 0.797 | 0.704 | 0.883 | 0.785 |
| 92625_at   | 0.142 | 0.905 | 1.196 | 0.882 | 1.013 |
| 92626_at   | 0.136 | 1.031 | 1.062 | 1.049 | 0.945 |
| 92628_at   | 0.276 | 1.022 | 1.073 | 0.956 | 1.124 |
| 92629_f_at | 0.259 | 1.215 | 1.178 | 1.141 | 1.071 |
| 92630_r_at | 0.151 | 1.048 | 0.980 | 1.068 | 0.959 |
| 92631_f_at | 0.396 | 0.931 | 0.946 | 1.021 | 0.942 |
| 92632_at   | 0.282 | 1.039 | 1.096 | 1.027 | 1.117 |
| 92633_at   | 0.035 | 1.432 | 2.106 | 1.168 | 1.769 |
| 92634_at   | 0.137 | 1.042 | 0.954 | 0.966 | 1.014 |
| 92635_at   | 0.371 | 0.967 | 0.932 | 0.993 | 0.963 |
| 92636_f_at | 0.095 | 1.084 | 1.397 | 0.970 | 1.130 |
| 92637_at   | 0.175 | 1.168 | 1.077 | 1.140 | 1.026 |
| 92638_at   | 0.350 | 1.291 | 1.287 | 1.158 | 1.164 |
| 92639_at   | 0.137 | 1.050 | 1.168 | 1.004 | 1.186 |
| 92640_at   | 0.461 | 1.118 | 1.193 | 1.023 | 1.168 |
| 92642_at   | 0.063 | 1.007 | 1.477 | 0.918 | 1.208 |
| 92643_at   | 0.197 | 1.097 | 1.060 | 1.120 | 1.059 |
| 92644_s_at | 0.297 | 2.137 | 2.046 | 1.624 | 1.750 |
| 92645_at   | 0.475 | 0.872 | 0.875 | 0.899 | 0.822 |
| 92646_at   | 0.202 | 1.015 | 1.072 | 0.974 | 1.097 |
| 92647_at   | 0.239 | 1.173 | 1.253 | 0.925 | 1.147 |
| 92648_at   | 0.231 | 1.220 | 1.207 | 0.942 | 1.284 |
| 92649_at   | 0.212 | 1.239 | 1.168 | 1.009 | 1.209 |
| 92650_at   | 0.472 | 0.996 | 0.953 | 0.989 | 0.970 |
| 92652_at   | 0.232 | 1.204 | 1.096 | 1.102 | 1.060 |
| 92653_at   | 0.298 | 1.019 | 1.008 | 0.967 | 1.023 |
| 92654_at   | 0.091 | 0.965 | 0.902 | 0.927 | 0.921 |
| 92655_at   | 0.477 | 0.918 | 0.866 | 0.931 | 0.907 |



|            |       |       |        |       |       |
|------------|-------|-------|--------|-------|-------|
| 92656_at   | 0.339 | 0.913 | 0.834  | 0.953 | 0.906 |
| 92658_at   | 0.381 | 0.994 | 0.934  | 0.974 | 0.933 |
| 92659_at   | 0.490 | 0.826 | 0.794  | 0.858 | 0.829 |
| 92660_f_at | 0.381 | 1.432 | 1.369  | 1.159 | 1.462 |
| 92661_at   | 0.441 | 0.977 | 0.937  | 0.969 | 0.990 |
| 92662_g_at | 0.291 | 0.882 | 0.828  | 0.953 | 0.846 |
| 92663_at   | 0.358 | 0.848 | 0.830  | 0.934 | 0.871 |
| 92664_at   | 0.212 | 0.842 | 0.878  | 0.995 | 0.899 |
| 92665_f_at | 0.089 | 1.072 | 1.216  | 0.908 | 1.279 |
| 92666_at   | 0.488 | 0.916 | 0.880  | 0.930 | 0.897 |
| 92667_at   | 0.302 | 0.940 | 0.888  | 1.001 | 0.926 |
| 92668_at   | 0.046 | 1.023 | 1.265  | 1.026 | 1.170 |
| 92670_at   | 0.385 | 0.797 | 0.811  | 0.882 | 0.837 |
| 92671_f_at | 0.322 | 1.051 | 1.104  | 0.985 | 1.092 |
| 92672_at   | 0.427 | 0.850 | 0.847  | 0.886 | 0.854 |
| 92673_at   | 0.388 | 0.962 | 0.907  | 0.964 | 0.937 |
| 92674_at   | 0.468 | 0.884 | 0.840  | 0.930 | 0.852 |
| 92676_at   | 0.449 | 1.101 | 1.067  | 1.097 | 1.071 |
| 92677_s_at | 0.368 | 0.841 | 0.770  | 0.883 | 0.828 |
| 92678_at   | 0.378 | 0.941 | 0.903  | 0.955 | 0.912 |
| 92681_at   | 0.480 | 0.874 | 0.835  | 0.862 | 0.847 |
| 92682_at   | 0.392 | 0.914 | 0.895  | 0.992 | 0.925 |
| 92683_at   | 0.143 | 0.852 | 1.010  | 0.825 | 1.045 |
| 92684_at   | 0.477 | 0.831 | 0.806  | 0.896 | 0.825 |
| 92685_at   | 0.388 | 0.936 | 0.890  | 0.964 | 0.885 |
| 92686_at   | 0.470 | 0.946 | 0.977  | 0.975 | 0.958 |
| 92687_at   | 0.438 | 0.871 | 0.870  | 0.932 | 0.893 |
| 92688_at   | 0.198 | 1.047 | 1.125  | 1.065 | 1.111 |
| 92689_at   | 0.406 | 0.919 | 0.933  | 0.918 | 0.930 |
| 92690_at   | 0.388 | 0.844 | 0.836  | 0.906 | 0.824 |
| 92691_at   | 0.181 | 0.924 | 0.835  | 0.993 | 0.923 |
| 92692_at   | 0.436 | 0.884 | 0.887  | 0.928 | 0.903 |
| 92693_at   | 0.231 | 1.093 | 1.013  | 1.023 | 1.083 |
| 92694_at   | 0.003 | 1.755 | 10.384 | 1.416 | 6.848 |
| 92695_at   | 0.394 | 0.965 | 0.947  | 1.008 | 0.948 |
| 92696_at   | 0.202 | 0.893 | 0.831  | 0.947 | 0.905 |
| 92697_at   | 0.359 | 1.278 | 1.246  | 1.190 | 1.185 |
| 92698_at   | 0.193 | 1.029 | 1.028  | 1.107 | 1.158 |
| 92699_at   | 0.275 | 0.886 | 0.889  | 0.997 | 0.864 |
| 92700_at   | 0.418 | 0.863 | 0.797  | 0.915 | 0.831 |
| 92701_at   | 0.390 | 0.993 | 0.931  | 1.003 | 0.950 |
| 92702_at   | 0.392 | 0.891 | 0.852  | 0.931 | 0.833 |
| 92703_at   | 0.165 | 0.991 | 0.931  | 0.951 | 1.063 |
| 92704_at   | 0.370 | 0.905 | 0.888  | 0.965 | 0.910 |
| 92705_at   | 0.109 | 1.077 | 0.962  | 1.063 | 0.935 |
| 92706_at   | 0.309 | 0.904 | 0.886  | 0.997 | 0.957 |
| 92707_at   | 0.362 | 0.954 | 0.961  | 0.997 | 0.924 |

|            |       |       |       |       |       |
|------------|-------|-------|-------|-------|-------|
| 92708_at   | 0.385 | 1.024 | 0.956 | 0.964 | 0.999 |
| 92710_at   | 0.231 | 1.043 | 0.951 | 1.028 | 0.999 |
| 92711_at   | 0.247 | 0.902 | 0.835 | 0.968 | 0.870 |
| 92712_at   | 0.432 | 0.789 | 0.758 | 0.817 | 0.753 |
| 92713_at   | 0.440 | 0.815 | 0.820 | 0.890 | 0.797 |
| 92714_at   | 0.358 | 0.757 | 0.758 | 0.858 | 0.795 |
| 92715_at   | 0.362 | 0.843 | 0.880 | 0.894 | 0.841 |
| 92717_at   | 0.393 | 0.897 | 0.863 | 0.925 | 0.890 |
| 92718_at   | 0.395 | 1.084 | 0.892 | 1.263 | 0.994 |
| 92722_f_at | 0.336 | 1.010 | 1.031 | 1.085 | 1.021 |
| 92724_at   | 0.286 | 1.148 | 1.065 | 0.952 | 1.042 |
| 92725_at   | 0.441 | 0.877 | 0.867 | 0.922 | 0.861 |
| 92726_at   | 0.226 | 0.957 | 0.903 | 0.923 | 0.922 |
| 92727_at   | 0.301 | 0.837 | 0.803 | 0.951 | 0.816 |
| 92728_at   | 0.362 | 0.874 | 0.919 | 0.884 | 0.851 |
| 92730_at   | 0.388 | 1.110 | 1.079 | 1.036 | 1.127 |
| 92731_at   | 0.264 | 0.831 | 0.835 | 0.902 | 0.895 |
| 92732_at   | 0.463 | 0.889 | 0.878 | 0.910 | 0.898 |
| 92733_at   | 0.229 | 0.880 | 0.824 | 0.925 | 0.855 |
| 92734_at   | 0.261 | 0.968 | 0.918 | 1.022 | 0.947 |
| 92735_at   | 0.477 | 0.801 | 0.764 | 0.840 | 0.789 |
| 92736_at   | 0.275 | 0.827 | 0.883 | 0.893 | 0.900 |
| 92737_at   | 0.035 | 1.021 | 1.398 | 1.002 | 1.069 |
| 92738_at   | 0.391 | 0.945 | 0.948 | 0.982 | 0.940 |
| 92739_at   | 0.246 | 0.836 | 0.830 | 0.940 | 0.875 |
| 92740_at   | 0.112 | 0.435 | 0.747 | 0.448 | 0.544 |
| 92741_g_at | 0.131 | 0.650 | 0.747 | 0.741 | 0.660 |
| 92742_at   | 0.085 | 0.903 | 1.693 | 1.024 | 0.920 |
| 92743_at   | 0.332 | 0.878 | 0.844 | 0.845 | 0.820 |
| 92744_at   | 0.459 | 0.906 | 0.914 | 0.974 | 0.904 |
| 92745_at   | 0.265 | 0.895 | 0.869 | 0.952 | 0.897 |
| 92746_at   | 0.297 | 0.940 | 0.989 | 0.956 | 1.028 |
| 92747_at   | 0.461 | 1.020 | 0.977 | 1.041 | 0.962 |
| 92749_at   | 0.386 | 0.933 | 0.878 | 0.975 | 0.903 |
| 92750_s_at | 0.397 | 0.896 | 0.882 | 0.938 | 0.939 |
| 92751_i_at | 0.322 | 0.901 | 0.880 | 0.952 | 0.928 |
| 92752_r_at | 0.448 | 0.881 | 0.825 | 0.919 | 0.843 |
| 92753_at   | 0.283 | 0.897 | 0.827 | 0.946 | 0.862 |
| 92754_at   | 0.179 | 0.955 | 0.868 | 0.937 | 0.949 |
| 92755_f_at | 0.391 | 0.879 | 0.839 | 0.958 | 0.886 |
| 92756_r_at | 0.375 | 0.860 | 0.849 | 0.947 | 0.890 |
| 92757_at   | 0.404 | 0.833 | 0.758 | 0.870 | 0.789 |
| 92758_at   | 0.494 | 0.864 | 0.842 | 0.879 | 0.814 |
| 92759_at   | 0.077 | 1.205 | 1.046 | 1.074 | 1.143 |
| 92760_at   | 0.287 | 0.924 | 0.959 | 0.944 | 0.973 |
| 92761_at   | 0.379 | 0.854 | 0.832 | 0.914 | 0.835 |
| 92762_at   | 0.095 | 1.013 | 1.204 | 1.013 | 1.294 |

|            |       |       |       |       |       |
|------------|-------|-------|-------|-------|-------|
| 92763_at   | 0.349 | 0.935 | 0.981 | 0.940 | 0.985 |
| 92764_at   | 0.109 | 0.844 | 0.845 | 0.985 | 0.919 |
| 92765_s_at | 0.312 | 0.921 | 0.919 | 1.009 | 0.919 |
| 92766_at   | 0.355 | 0.803 | 0.760 | 0.883 | 0.821 |
| 92767_at   | 0.472 | 0.928 | 0.956 | 0.946 | 0.984 |
| 92768_s_at | 0.276 | 1.147 | 1.182 | 1.024 | 1.351 |
| 92769_at   | 0.468 | 1.032 | 1.039 | 1.032 | 1.035 |
| 92770_at   | 0.193 | 1.135 | 1.009 | 0.968 | 1.137 |
| 92771_at   | 0.181 | 1.316 | 1.428 | 1.067 | 1.434 |
| 92773_at   | 0.165 | 1.333 | 1.186 | 1.058 | 1.261 |
| 92774_at   | 0.444 | 0.886 | 0.819 | 0.938 | 0.850 |
| 92775_at   | 0.461 | 1.279 | 1.317 | 1.232 | 1.211 |
| 92777_at   | 0.051 | 1.029 | 0.889 | 0.896 | 0.729 |
| 92778_i_at | 0.248 | 0.956 | 1.127 | 0.976 | 1.028 |
| 92779_f_at | 0.401 | 0.925 | 1.033 | 0.946 | 0.941 |
| 92780_f_at | 0.102 | 1.019 | 1.434 | 0.994 | 1.079 |
| 92781_at   | 0.370 | 0.956 | 0.895 | 0.979 | 0.894 |
| 92782_at   | 0.364 | 0.917 | 0.973 | 0.965 | 0.999 |
| 92783_at   | 0.390 | 0.866 | 0.857 | 0.936 | 0.900 |
| 92784_at   | 0.382 | 0.907 | 0.905 | 0.976 | 0.903 |
| 92786_at   | 0.298 | 0.920 | 0.889 | 1.010 | 0.926 |
| 92787_at   | 0.308 | 0.982 | 0.931 | 0.911 | 0.926 |
| 92788_f_at | 0.159 | 1.022 | 1.024 | 0.941 | 1.098 |
| 92789_r_at | 0.110 | 1.066 | 1.017 | 0.977 | 1.069 |
| 92790_at   | 0.110 | 1.280 | 1.501 | 1.143 | 1.539 |
| 92792_at   | 0.350 | 0.854 | 0.846 | 0.897 | 0.858 |
| 92793_at   | 0.069 | 1.041 | 1.118 | 1.072 | 0.971 |
| 92794_f_at | 0.048 | 0.993 | 1.174 | 0.963 | 1.070 |
| 92795_at   | 0.252 | 1.360 | 1.169 | 1.125 | 1.163 |
| 92796_at   | 0.325 | 0.920 | 0.863 | 0.951 | 0.932 |
| 92797_at   | 0.236 | 1.279 | 1.430 | 1.186 | 1.315 |
| 92798_at   | 0.291 | 0.903 | 1.075 | 1.021 | 1.052 |
| 92799_g_at | 0.436 | 0.982 | 1.095 | 1.070 | 1.087 |
| 92800_i_at | 0.301 | 1.105 | 1.256 | 1.097 | 1.232 |
| 92801_at   | 0.311 | 0.949 | 0.891 | 1.039 | 0.932 |
| 92802_s_at | 0.289 | 0.829 | 0.830 | 0.931 | 0.842 |
| 92803_at   | 0.411 | 0.882 | 0.806 | 0.919 | 0.830 |
| 92804_at   | 0.428 | 1.004 | 1.060 | 1.022 | 1.003 |
| 92805_s_at | 0.310 | 0.955 | 0.911 | 1.033 | 0.980 |
| 92806_at   | 0.420 | 1.050 | 1.015 | 0.980 | 1.030 |
| 92807_at   | 0.151 | 1.143 | 1.202 | 0.996 | 1.198 |
| 92808_f_at | 0.069 | 1.023 | 0.827 | 0.979 | 0.808 |
| 92809_r_at | 0.117 | 1.110 | 0.968 | 1.084 | 0.907 |
| 92810_at   | 0.294 | 1.397 | 1.499 | 1.164 | 1.475 |
| 92811_at   | 0.505 | 0.902 | 0.890 | 0.918 | 0.883 |
| 92812_f_at | 0.298 | 0.866 | 0.855 | 0.928 | 0.951 |
| 92813_at   | 0.449 | 0.928 | 0.894 | 0.958 | 0.924 |

|            |       |       |       |       |       |
|------------|-------|-------|-------|-------|-------|
| 92814_at   | 0.407 | 0.995 | 0.991 | 1.047 | 0.983 |
| 92816_r_at | 0.488 | 1.025 | 1.063 | 1.027 | 1.033 |
| 92817_at   | 0.218 | 1.016 | 1.050 | 0.872 | 1.078 |
| 92818_at   | 0.389 | 1.074 | 1.181 | 1.016 | 1.170 |
| 92820_at   | 0.096 | 1.067 | 0.920 | 1.128 | 0.895 |
| 92821_at   | 0.120 | 0.962 | 0.810 | 0.985 | 0.845 |
| 92824_at   | 0.196 | 0.879 | 0.964 | 0.926 | 0.920 |
| 92825_at   | 0.272 | 0.958 | 0.905 | 0.998 | 0.958 |
| 92826_at   | 0.283 | 1.022 | 1.046 | 0.966 | 1.065 |
| 92827_at   | 0.314 | 0.840 | 0.857 | 0.912 | 0.888 |
| 92828_at   | 0.399 | 1.186 | 1.188 | 1.023 | 1.232 |
| 92829_at   | 0.379 | 1.028 | 1.042 | 0.976 | 0.897 |
| 92830_s_at | 0.355 | 1.066 | 1.116 | 1.087 | 1.019 |
| 92831_at   | 0.324 | 1.094 | 1.223 | 1.252 | 1.097 |
| 92832_at   | 0.028 | 0.983 | 1.337 | 1.010 | 0.949 |
| 92833_at   | 0.127 | 1.039 | 1.235 | 1.009 | 1.208 |
| 92834_at   | 0.035 | 1.024 | 1.183 | 0.888 | 1.123 |
| 92835_at   | 0.401 | 0.851 | 0.800 | 0.903 | 0.865 |
| 92836_at   | 0.290 | 1.123 | 0.914 | 1.065 | 1.077 |
| 92837_f_at | 0.441 | 0.857 | 0.845 | 0.907 | 0.883 |
| 92838_at   | 0.228 | 0.974 | 1.038 | 1.058 | 0.980 |
| 92839_f_at | 0.256 | 1.205 | 1.231 | 1.105 | 1.139 |
| 92840_at   | 0.467 | 1.034 | 1.079 | 1.020 | 1.042 |
| 92841_f_at | 0.345 | 0.862 | 0.834 | 0.868 | 0.813 |
| 92842_r_at | 0.431 | 0.957 | 0.936 | 0.995 | 0.954 |
| 92843_r_at | 0.477 | 0.780 | 0.729 | 0.822 | 0.770 |
| 92845_at   | 0.312 | 1.224 | 1.280 | 1.231 | 1.063 |
| 92846_at   | 0.340 | 0.903 | 0.850 | 0.915 | 0.904 |
| 92847_s_at | 0.386 | 1.126 | 1.085 | 1.061 | 1.176 |
| 92848_at   | 0.316 | 1.043 | 1.150 | 0.987 | 1.031 |
| 92849_at   | 0.213 | 0.821 | 1.018 | 0.874 | 0.938 |
| 92850_at   | 0.253 | 1.284 | 1.514 | 1.086 | 1.212 |
| 92851_at   | 0.284 | 1.530 | 2.118 | 1.513 | 1.441 |
| 92852_at   | 0.216 | 1.174 | 1.314 | 1.105 | 1.134 |
| 92853_at   | 0.434 | 0.938 | 0.954 | 0.973 | 0.902 |
| 92854_at   | 0.481 | 1.150 | 1.227 | 1.105 | 1.161 |
| 92855_at   | 0.196 | 1.186 | 1.131 | 1.032 | 1.126 |
| 92856_at   | 0.441 | 0.892 | 0.875 | 0.937 | 0.915 |
| 92857_at   | 0.254 | 1.068 | 1.085 | 1.030 | 1.166 |
| 92858_at   | 0.112 | 1.210 | 2.207 | 1.083 | 1.225 |
| 92860_at   | 0.379 | 0.941 | 0.917 | 0.927 | 0.941 |
| 92861_i_at | 0.325 | 0.933 | 0.881 | 1.086 | 0.856 |
| 92862_f_at | 0.243 | 0.825 | 0.744 | 1.011 | 0.739 |
| 92863_at   | 0.117 | 1.011 | 1.008 | 1.064 | 0.950 |
| 92864_at   | 0.234 | 0.975 | 0.885 | 1.025 | 0.990 |
| 92865_at   | 0.265 | 0.971 | 0.880 | 0.984 | 0.919 |
| 92866_at   | 0.029 | 1.149 | 1.480 | 0.938 | 1.256 |

|            |       |       |       |       |       |
|------------|-------|-------|-------|-------|-------|
| 92867_at   | 0.286 | 1.150 | 1.042 | 1.050 | 1.046 |
| 92868_at   | 0.256 | 0.928 | 0.891 | 0.981 | 0.939 |
| 92869_at   | 0.375 | 1.050 | 0.981 | 1.004 | 1.025 |
| 92870_at   | 0.233 | 0.954 | 1.021 | 1.026 | 0.977 |
| 92871_at   | 0.281 | 1.270 | 1.255 | 1.148 | 1.063 |
| 92872_at   | 0.448 | 1.046 | 1.056 | 1.014 | 1.071 |
| 92873_f_at | 0.370 | 0.958 | 0.901 | 0.943 | 0.953 |
| 92874_f_at | 0.459 | 1.071 | 1.073 | 1.013 | 1.070 |
| 92875_s_at | 0.283 | 0.803 | 0.843 | 0.896 | 0.887 |
| 92876_at   | 0.484 | 0.994 | 1.002 | 1.013 | 1.013 |
| 92877_at   | 0.214 | 1.228 | 1.572 | 1.181 | 1.421 |
| 92878_at   | 0.337 | 0.903 | 0.951 | 0.962 | 0.933 |
| 92879_at   | 0.427 | 1.043 | 1.013 | 0.988 | 1.053 |
| 92880_at   | 0.297 | 1.101 | 1.018 | 1.008 | 1.056 |
| 92881_at   | 0.270 | 0.861 | 0.772 | 0.936 | 0.807 |
| 92882_at   | 0.375 | 1.045 | 1.220 | 1.115 | 1.201 |
| 92883_at   | 0.454 | 1.081 | 1.017 | 1.061 | 1.036 |
| 92884_at   | 0.182 | 1.263 | 1.235 | 1.041 | 1.177 |
| 92885_at   | 0.219 | 1.058 | 0.757 | 1.532 | 0.824 |
| 92887_at   | 0.051 | 1.049 | 0.958 | 0.907 | 1.094 |
| 92888_s_at | 0.359 | 0.955 | 0.890 | 0.969 | 1.046 |
| 92889_r_at | 0.308 | 0.924 | 0.895 | 1.002 | 0.951 |
| 92890_at   | 0.308 | 0.914 | 0.874 | 0.981 | 0.887 |
| 92891_f_at | 0.412 | 0.894 | 0.906 | 0.937 | 0.925 |
| 92892_at   | 0.290 | 0.897 | 0.854 | 0.931 | 0.866 |
| 92893_at   | 0.465 | 1.263 | 1.193 | 1.141 | 1.237 |
| 92894_s_at | 0.167 | 0.922 | 0.854 | 1.003 | 0.885 |
| 92895_at   | 0.212 | 0.866 | 0.865 | 0.956 | 0.886 |
| 92896_s_at | 0.250 | 0.826 | 0.823 | 1.067 | 0.843 |
| 92897_at   | 0.375 | 0.911 | 0.830 | 0.873 | 0.857 |
| 92898_at   | 0.238 | 0.930 | 1.033 | 0.946 | 0.945 |
| 92899_at   | 0.309 | 0.857 | 0.902 | 0.948 | 0.899 |
| 92900_at   | 0.494 | 0.940 | 0.899 | 0.949 | 0.909 |
| 92901_at   | 0.042 | 0.907 | 1.022 | 1.158 | 0.953 |
| 92902_at   | 0.189 | 0.928 | 0.930 | 0.921 | 0.980 |
| 92903_at   | 0.443 | 0.818 | 0.761 | 0.791 | 0.790 |
| 92904_at   | 0.304 | 1.032 | 0.976 | 0.974 | 0.917 |
| 92905_at   | 0.239 | 0.986 | 0.983 | 0.996 | 1.000 |
| 92906_at   | 0.452 | 0.875 | 0.846 | 0.880 | 0.894 |
| 92907_at   | 0.238 | 1.011 | 0.951 | 1.031 | 1.022 |
| 92908_at   | 0.280 | 1.115 | 0.997 | 0.891 | 1.004 |
| 92909_at   | 0.335 | 0.868 | 0.905 | 0.889 | 0.896 |
| 92910_at   | 0.246 | 0.886 | 0.847 | 0.972 | 0.864 |
| 92911_at   | 0.459 | 1.098 | 1.024 | 1.063 | 1.058 |
| 92912_at   | 0.444 | 0.825 | 0.829 | 0.879 | 0.789 |
| 92913_at   | 0.076 | 0.972 | 1.090 | 1.075 | 1.250 |
| 92914_at   | 0.284 | 0.949 | 0.866 | 0.978 | 0.931 |

|            |       |       |       |       |       |
|------------|-------|-------|-------|-------|-------|
| 92915_s_at | 0.441 | 0.920 | 0.886 | 0.952 | 0.951 |
| 92916_at   | 0.325 | 0.914 | 0.851 | 0.943 | 0.891 |
| 92917_at   | 0.413 | 0.899 | 0.887 | 0.971 | 0.911 |
| 92918_at   | 0.117 | 1.163 | 1.592 | 1.143 | 1.455 |
| 92919_at   | 0.408 | 0.862 | 0.817 | 0.920 | 0.843 |
| 92920_at   | 0.263 | 0.933 | 0.904 | 0.989 | 0.878 |
| 92921_at   | 0.410 | 0.876 | 0.822 | 0.880 | 0.808 |
| 92922_at   | 0.386 | 0.853 | 0.820 | 0.916 | 0.874 |
| 92923_g_at | 0.353 | 0.828 | 0.820 | 0.878 | 0.862 |
| 92924_at   | 0.470 | 0.914 | 0.918 | 0.917 | 0.900 |
| 92925_at   | 0.398 | 1.195 | 1.165 | 1.214 | 1.321 |
| 92926_at   | 0.386 | 1.009 | 0.978 | 1.018 | 0.932 |
| 92927_at   | 0.488 | 1.007 | 1.005 | 1.032 | 1.009 |
| 92929_at   | 0.505 | 0.833 | 0.810 | 0.864 | 0.818 |
| 92930_at   | 0.430 | 0.842 | 0.827 | 0.884 | 0.832 |
| 92931_at   | 0.400 | 1.070 | 0.980 | 1.008 | 1.099 |
| 92932_at   | 0.369 | 0.933 | 0.881 | 0.971 | 0.870 |
| 92933_at   | 0.296 | 0.869 | 0.860 | 0.941 | 0.850 |
| 92934_at   | 0.115 | 1.008 | 0.890 | 0.921 | 1.074 |
| 92935_at   | 0.301 | 0.942 | 0.920 | 0.964 | 0.911 |
| 92936_at   | 0.273 | 0.887 | 0.923 | 0.905 | 0.943 |
| 92937_at   | 0.200 | 0.945 | 0.856 | 0.967 | 0.900 |
| 92938_at   | 0.328 | 0.927 | 0.897 | 0.967 | 0.892 |
| 92939_at   | 0.420 | 0.909 | 0.879 | 0.957 | 0.900 |
| 92940_s_at | 0.438 | 0.809 | 0.776 | 0.861 | 0.820 |
| 92941_at   | 0.346 | 1.043 | 0.993 | 1.051 | 0.995 |
| 92942_at   | 0.289 | 0.947 | 0.922 | 0.964 | 0.983 |
| 92943_at   | 0.481 | 0.919 | 0.886 | 0.903 | 0.880 |
| 92944_at   | 0.242 | 0.912 | 0.878 | 0.998 | 0.897 |
| 92945_at   | 0.350 | 1.013 | 0.984 | 0.977 | 0.981 |
| 92946_f_at | 0.392 | 0.858 | 0.839 | 0.897 | 0.872 |
| 92947_s_at | 0.390 | 0.975 | 0.958 | 1.013 | 1.008 |
| 92948_at   | 0.477 | 0.951 | 0.968 | 0.958 | 0.979 |
| 92949_at   | 0.419 | 0.800 | 0.804 | 0.877 | 0.795 |
| 92950_at   | 0.443 | 0.874 | 0.854 | 0.937 | 0.838 |
| 92951_at   | 0.318 | 0.847 | 0.771 | 0.918 | 0.856 |
| 92952_f_at | 0.275 | 0.905 | 0.892 | 0.938 | 0.955 |
| 92953_at   | 0.472 | 0.802 | 0.837 | 0.841 | 0.805 |
| 92955_at   | 0.323 | 0.959 | 0.992 | 0.972 | 1.007 |
| 92956_at   | 0.335 | 1.167 | 1.076 | 1.164 | 1.112 |
| 92957_at   | 0.342 | 0.831 | 0.823 | 0.875 | 0.888 |
| 92958_at   | 0.228 | 1.261 | 1.092 | 1.145 | 1.361 |
| 92959_at   | 0.379 | 0.946 | 0.929 | 0.961 | 0.980 |
| 92960_at   | 0.429 | 0.876 | 0.856 | 0.909 | 0.857 |
| 92961_at   | 0.421 | 0.843 | 0.848 | 0.927 | 0.868 |
| 92962_at   | 0.117 | 0.977 | 1.049 | 0.877 | 0.919 |
| 92963_at   | 0.431 | 0.943 | 0.934 | 0.908 | 0.936 |

|            |       |       |       |       |       |
|------------|-------|-------|-------|-------|-------|
| 92965_at   | 0.387 | 0.871 | 0.804 | 0.878 | 0.851 |
| 92966_g_at | 0.445 | 0.870 | 0.808 | 0.878 | 0.865 |
| 92967_r_at | 0.230 | 0.886 | 0.891 | 0.981 | 0.937 |
| 92968_at   | 0.320 | 1.046 | 1.069 | 1.013 | 1.052 |
| 92969_at   | 0.379 | 1.008 | 0.968 | 0.997 | 0.984 |
| 92970_at   | 0.375 | 0.866 | 0.865 | 0.896 | 0.920 |
| 92971_at   | 0.067 | 0.995 | 0.811 | 1.023 | 0.902 |
| 92972_at   | 0.428 | 0.922 | 0.883 | 0.964 | 0.903 |
| 92974_at   | 0.057 | 1.074 | 0.955 | 0.994 | 0.975 |
| 92975_at   | 0.468 | 1.000 | 1.018 | 1.025 | 1.023 |
| 92976_at   | 0.379 | 0.981 | 0.964 | 1.036 | 0.966 |
| 92977_s_at | 0.325 | 0.880 | 0.855 | 0.934 | 0.837 |
| 92978_s_at | 0.352 | 0.932 | 1.011 | 0.987 | 0.984 |
| 92979_at   | 0.497 | 0.889 | 0.878 | 0.939 | 0.853 |
| 92980_at   | 0.484 | 0.822 | 0.801 | 0.879 | 0.793 |
| 92981_at   | 0.358 | 0.966 | 0.983 | 0.986 | 0.929 |
| 92982_at   | 0.242 | 0.899 | 0.830 | 1.011 | 0.901 |
| 92983_at   | 0.263 | 0.927 | 0.907 | 0.998 | 0.950 |
| 92984_g_at | 0.130 | 0.977 | 1.035 | 1.059 | 1.047 |
| 92985_at   | 0.445 | 0.936 | 0.925 | 0.939 | 0.874 |
| 92986_g_at | 0.397 | 0.873 | 0.818 | 0.896 | 0.857 |
| 92987_at   | 0.204 | 1.103 | 0.969 | 1.076 | 1.002 |
| 92988_i_at | 0.474 | 0.960 | 0.924 | 0.942 | 0.913 |
| 92989_f_at | 0.465 | 0.881 | 0.830 | 0.880 | 0.830 |
| 92990_at   | 0.391 | 0.885 | 0.848 | 0.922 | 0.894 |
| 92991_at   | 0.384 | 0.954 | 0.933 | 0.975 | 0.982 |
| 92992_i_at | 0.394 | 1.072 | 1.014 | 1.038 | 1.073 |
| 92993_r_at | 0.400 | 0.967 | 0.971 | 0.930 | 0.962 |
| 92994_at   | 0.480 | 0.941 | 0.930 | 0.961 | 0.899 |
| 92995_at   | 0.232 | 0.941 | 0.890 | 1.010 | 1.077 |
| 92996_at   | 0.117 | 1.061 | 0.952 | 0.929 | 1.143 |
| 92997_g_at | 0.085 | 1.014 | 0.883 | 0.934 | 1.072 |
| 92998_at   | 0.124 | 0.885 | 0.960 | 1.030 | 0.990 |
| 92999_at   | 0.119 | 0.982 | 0.892 | 1.062 | 0.919 |
| 93000_g_at | 0.308 | 0.948 | 0.904 | 0.994 | 0.942 |
| 93001_at   | 0.196 | 1.066 | 1.027 | 1.076 | 0.980 |
| 93002_r_at | 0.495 | 0.815 | 0.763 | 0.861 | 0.792 |
| 93004_r_at | 0.256 | 0.868 | 0.826 | 0.957 | 0.880 |
| 93005_at   | 0.419 | 0.957 | 0.916 | 0.950 | 0.939 |
| 93006_at   | 0.422 | 0.891 | 0.830 | 0.912 | 0.840 |
| 93007_at   | 0.256 | 1.092 | 1.105 | 1.141 | 1.155 |
| 93008_at   | 0.085 | 1.021 | 1.241 | 0.917 | 1.157 |
| 93009_at   | 0.389 | 1.037 | 0.978 | 1.009 | 0.988 |
| 93010_at   | 0.480 | 0.928 | 0.903 | 0.956 | 0.930 |
| 93011_at   | 0.360 | 1.050 | 1.002 | 0.989 | 1.035 |
| 93012_at   | 0.475 | 0.924 | 0.922 | 0.961 | 0.935 |
| 93013_at   | 0.199 | 1.070 | 1.046 | 0.953 | 1.022 |

|            |       |       |       |       |       |
|------------|-------|-------|-------|-------|-------|
| 93014_at   | 0.268 | 0.987 | 1.027 | 0.919 | 1.087 |
| 93015_at   | 0.091 | 1.130 | 0.915 | 1.060 | 0.955 |
| 93016_at   | 0.509 | 1.041 | 1.048 | 1.017 | 1.050 |
| 93017_at   | 0.246 | 1.280 | 1.375 | 1.133 | 1.437 |
| 93018_at   | 0.420 | 0.956 | 0.968 | 0.980 | 0.914 |
| 93019_at   | 0.039 | 1.304 | 1.492 | 1.115 | 1.511 |
| 93020_at   | 0.417 | 0.887 | 0.817 | 0.917 | 0.870 |
| 93021_at   | 0.120 | 1.185 | 1.368 | 0.993 | 1.259 |
| 93022_i_at | 0.496 | 0.946 | 0.913 | 0.929 | 0.917 |
| 93023_f_at | 0.369 | 0.893 | 0.924 | 0.965 | 0.933 |
| 93024_at   | 0.266 | 0.991 | 0.895 | 0.979 | 0.992 |
| 93025_at   | 0.263 | 1.156 | 1.158 | 0.999 | 1.218 |
| 93026_at   | 0.186 | 1.138 | 0.988 | 1.003 | 1.029 |
| 93027_r_at | 0.456 | 0.815 | 0.788 | 0.879 | 0.785 |
| 93028_at   | 0.184 | 1.111 | 0.889 | 1.604 | 1.023 |
| 93029_at   | 0.467 | 1.084 | 1.185 | 1.187 | 1.179 |
| 93030_at   | 0.067 | 1.034 | 1.082 | 0.924 | 1.068 |
| 93033_at   | 0.478 | 0.977 | 0.974 | 1.003 | 0.988 |
| 93037_i_at | 0.481 | 1.326 | 1.356 | 1.139 | 1.486 |
| 93038_f_at | 0.327 | 1.163 | 1.198 | 1.098 | 1.248 |
| 93039_at   | 0.244 | 1.142 | 1.123 | 1.098 | 1.235 |
| 93040_at   | 0.193 | 0.874 | 0.810 | 1.008 | 0.890 |
| 93041_at   | 0.342 | 1.202 | 1.175 | 1.042 | 1.219 |
| 93042_at   | 0.162 | 0.959 | 0.997 | 0.979 | 1.076 |
| 93043_at   | 0.416 | 1.315 | 1.338 | 1.210 | 1.259 |
| 93045_at   | 0.390 | 1.356 | 1.417 | 1.200 | 1.353 |
| 93046_at   | 0.112 | 1.228 | 1.294 | 0.974 | 1.227 |
| 93047_at   | 0.262 | 0.858 | 0.867 | 0.945 | 0.923 |
| 93048_at   | 0.314 | 0.996 | 0.959 | 1.002 | 0.922 |
| 93050_at   | 0.383 | 0.957 | 0.774 | 0.888 | 0.811 |
| 93051_at   | 0.310 | 0.930 | 0.852 | 1.258 | 0.859 |
| 93053_at   | 0.141 | 0.877 | 0.822 | 0.936 | 0.831 |
| 93054_at   | 0.208 | 1.046 | 1.018 | 1.012 | 1.109 |
| 93055_at   | 0.319 | 1.060 | 1.136 | 1.094 | 1.370 |
| 93056_g_at | 0.209 | 0.988 | 1.065 | 1.005 | 1.215 |
| 93057_at   | 0.073 | 1.227 | 1.231 | 1.041 | 1.321 |
| 93058_at   | 0.346 | 1.159 | 1.310 | 1.091 | 1.347 |
| 93059_at   | 0.093 | 1.075 | 1.056 | 0.967 | 1.096 |
| 93061_at   | 0.337 | 0.902 | 0.832 | 0.959 | 0.877 |
| 93062_at   | 0.461 | 1.058 | 1.005 | 1.056 | 1.048 |
| 93063_at   | 0.363 | 1.137 | 1.061 | 1.069 | 1.122 |
| 93064_at   | 0.231 | 1.370 | 1.292 | 1.124 | 1.278 |
| 93065_at   | 0.481 | 0.898 | 0.857 | 0.934 | 0.885 |
| 93066_at   | 0.276 | 1.304 | 1.527 | 1.210 | 1.409 |
| 93067_f_at | 0.091 | 1.075 | 1.168 | 0.954 | 1.196 |
| 93068_r_at | 0.117 | 0.971 | 0.916 | 1.009 | 0.909 |
| 93069_at   | 0.490 | 1.103 | 1.108 | 1.017 | 1.157 |



|            |       |       |       |       |       |
|------------|-------|-------|-------|-------|-------|
| 93070_at   | 0.338 | 1.309 | 1.386 | 1.120 | 1.380 |
| 93071_at   | 0.074 | 1.176 | 1.121 | 1.098 | 1.021 |
| 93072_at   | 0.388 | 0.929 | 0.924 | 0.907 | 0.886 |
| 93073_at   | 0.454 | 0.904 | 0.872 | 0.898 | 0.888 |
| 93074_g_at | 0.329 | 0.892 | 0.907 | 0.989 | 0.912 |
| 93075_r_at | 0.265 | 0.930 | 0.948 | 0.986 | 0.915 |
| 93076_at   | 0.165 | 1.517 | 1.490 | 1.124 | 1.487 |
| 93077_s_at | 0.377 | 0.967 | 1.014 | 1.006 | 1.012 |
| 93078_at   | 0.314 | 0.985 | 1.014 | 0.961 | 0.961 |
| 93080_at   | 0.285 | 0.891 | 0.951 | 0.996 | 0.908 |
| 93081_at   | 0.499 | 1.197 | 1.299 | 1.136 | 1.247 |
| 93082_at   | 0.333 | 1.278 | 1.372 | 1.011 | 1.290 |
| 93083_at   | 0.090 | 1.090 | 1.075 | 0.998 | 1.112 |
| 93084_at   | 0.480 | 1.002 | 0.988 | 1.019 | 1.021 |
| 93085_at   | 0.090 | 1.116 | 1.348 | 0.955 | 1.207 |
| 93086_at   | 0.000 | 1.902 | 3.710 | 0.890 | 1.209 |
| 93087_r_at | 0.291 | 0.794 | 0.808 | 0.884 | 0.905 |
| 93088_at   | 0.441 | 1.087 | 1.192 | 1.088 | 1.142 |
| 93089_at   | 0.235 | 1.158 | 1.087 | 1.016 | 1.065 |
| 93090_at   | 0.230 | 1.201 | 1.134 | 1.063 | 1.235 |
| 93091_s_at | 0.316 | 0.893 | 0.896 | 0.959 | 0.974 |
| 93092_at   | 0.054 | 1.032 | 1.300 | 0.943 | 1.240 |
| 93093_at   | 0.331 | 1.358 | 1.330 | 1.158 | 1.384 |
| 93094_at   | 0.412 | 1.224 | 1.228 | 1.096 | 1.170 |
| 93095_at   | 0.238 | 1.128 | 1.158 | 0.942 | 1.163 |
| 93096_at   | 0.184 | 0.886 | 0.804 | 0.953 | 0.854 |
| 93097_at   | 0.070 | 1.036 | 4.388 | 1.069 | 1.209 |
| 93098_at   | 0.427 | 0.885 | 0.909 | 0.904 | 0.886 |
| 93099_f_at | 0.188 | 0.874 | 1.015 | 0.949 | 0.947 |
| 93100_at   | 0.187 | 0.954 | 1.540 | 1.081 | 0.904 |
| 93101_s_at | 0.166 | 1.157 | 1.054 | 1.067 | 1.122 |
| 93102_f_at | 0.146 | 0.923 | 1.031 | 1.095 | 0.889 |
| 93103_at   | 0.459 | 0.887 | 0.863 | 0.919 | 0.876 |
| 93104_at   | 0.363 | 1.150 | 1.225 | 1.019 | 1.253 |
| 93105_s_at | 0.077 | 0.732 | 0.924 | 0.726 | 0.922 |
| 93106_i_at | 0.175 | 0.942 | 1.015 | 0.808 | 1.071 |
| 93107_r_at | 0.500 | 0.976 | 0.972 | 0.966 | 0.978 |
| 93108_at   | 0.263 | 1.038 | 1.114 | 1.018 | 1.032 |
| 93109_f_at | 0.130 | 0.897 | 0.777 | 0.937 | 0.822 |
| 93111_at   | 0.496 | 1.150 | 1.155 | 1.108 | 1.156 |
| 93112_at   | 0.075 | 0.875 | 1.005 | 0.906 | 0.928 |
| 93114_at   | 0.145 | 0.872 | 0.936 | 0.978 | 0.871 |
| 93116_at   | 0.126 | 1.380 | 1.336 | 1.068 | 1.269 |
| 93117_at   | 0.174 | 1.362 | 1.396 | 1.031 | 1.322 |
| 93118_at   | 0.389 | 1.265 | 1.198 | 1.081 | 1.234 |
| 93119_at   | 0.337 | 1.043 | 1.184 | 1.099 | 1.108 |
| 93120_f_at | 0.074 | 1.035 | 1.187 | 1.050 | 1.046 |

|            |       |       |       |       |       |
|------------|-------|-------|-------|-------|-------|
| 93121_at   | 0.392 | 0.916 | 0.882 | 0.968 | 0.918 |
| 93122_at   | 0.310 | 0.985 | 0.982 | 1.121 | 0.969 |
| 93124_at   | 0.440 | 0.868 | 0.830 | 0.904 | 0.825 |
| 93126_at   | 0.423 | 1.134 | 1.091 | 1.076 | 1.129 |
| 93127_at   | 0.454 | 0.936 | 0.905 | 0.998 | 0.931 |
| 93128_at   | 0.237 | 0.928 | 0.849 | 0.941 | 0.935 |
| 93129_at   | 0.475 | 0.895 | 0.862 | 0.874 | 0.839 |
| 93130_at   | 0.232 | 1.051 | 0.933 | 1.066 | 1.052 |
| 93131_at   | 0.441 | 0.987 | 1.047 | 0.997 | 0.995 |
| 93132_at   | 0.421 | 0.912 | 0.909 | 0.938 | 0.931 |
| 93133_at   | 0.377 | 0.932 | 0.881 | 0.966 | 0.886 |
| 93134_at   | 0.273 | 0.866 | 0.822 | 0.942 | 0.887 |
| 93136_at   | 0.477 | 0.931 | 0.911 | 0.938 | 0.905 |
| 93137_at   | 0.349 | 0.909 | 0.847 | 0.950 | 0.901 |
| 93138_at   | 0.419 | 0.874 | 0.885 | 0.893 | 0.908 |
| 93139_at   | 0.495 | 0.830 | 0.841 | 0.887 | 0.825 |
| 93140_at   | 0.357 | 0.866 | 0.827 | 0.930 | 0.896 |
| 93141_at   | 0.379 | 0.855 | 0.840 | 0.927 | 0.827 |
| 93142_at   | 0.197 | 0.891 | 0.836 | 0.882 | 0.987 |
| 93143_at   | 0.195 | 0.890 | 0.800 | 1.146 | 0.835 |
| 93144_at   | 0.360 | 1.193 | 1.132 | 1.088 | 1.133 |
| 93145_at   | 0.249 | 1.011 | 0.967 | 0.926 | 0.978 |
| 93146_at   | 0.188 | 0.850 | 0.836 | 0.955 | 0.880 |
| 93147_f_at | 0.438 | 0.940 | 0.926 | 0.938 | 0.963 |
| 93148_at   | 0.144 | 1.041 | 0.983 | 1.060 | 1.046 |
| 93151_at   | 0.411 | 0.860 | 0.797 | 0.913 | 0.807 |
| 93153_at   | 0.117 | 1.130 | 0.976 | 1.054 | 1.091 |
| 93155_at   | 0.483 | 0.934 | 0.920 | 0.962 | 0.924 |
| 93158_at   | 0.403 | 0.876 | 0.873 | 0.936 | 0.866 |
| 93159_at   | 0.226 | 0.938 | 0.907 | 1.032 | 0.959 |
| 93162_f_at | 0.068 | 0.856 | 0.993 | 0.892 | 0.906 |
| 93163_at   | 0.427 | 0.915 | 0.873 | 0.929 | 0.903 |
| 93164_at   | 0.082 | 0.880 | 0.958 | 1.038 | 1.112 |
| 93165_at   | 0.272 | 1.046 | 0.946 | 0.985 | 0.978 |
| 93166_at   | 0.159 | 0.991 | 1.024 | 0.989 | 1.015 |
| 93167_f_at | 0.308 | 1.010 | 1.004 | 0.977 | 1.022 |
| 93168_at   | 0.468 | 0.957 | 0.954 | 0.942 | 0.967 |
| 93169_at   | 0.322 | 1.102 | 1.011 | 1.006 | 1.083 |
| 93173_at   | 0.250 | 0.952 | 0.894 | 0.982 | 0.898 |
| 93174_at   | 0.391 | 0.948 | 0.962 | 0.998 | 0.994 |
| 93175_at   | 0.196 | 1.140 | 0.997 | 1.077 | 1.033 |
| 93177_at   | 0.372 | 1.156 | 1.059 | 1.094 | 1.076 |
| 93178_at   | 0.188 | 1.032 | 0.912 | 1.031 | 0.965 |
| 93179_at   | 0.465 | 1.049 | 1.017 | 1.019 | 1.018 |
| 93180_at   | 0.353 | 0.954 | 0.995 | 0.968 | 0.918 |
| 93181_r_at | 0.386 | 0.901 | 0.815 | 0.937 | 0.791 |
| 93182_at   | 0.477 | 0.931 | 0.858 | 0.966 | 0.903 |

|            |       |       |       |       |       |
|------------|-------|-------|-------|-------|-------|
| 93183_at   | 0.091 | 1.022 | 1.067 | 1.014 | 1.113 |
| 93184_at   | 0.499 | 1.035 | 1.049 | 1.041 | 1.035 |
| 93185_at   | 0.051 | 1.189 | 1.592 | 1.080 | 1.236 |
| 93186_at   | 0.500 | 0.841 | 0.798 | 0.843 | 0.808 |
| 93187_at   | 0.048 | 1.045 | 0.940 | 1.087 | 0.929 |
| 93188_at   | 0.145 | 0.852 | 0.816 | 1.047 | 0.918 |
| 93190_at   | 0.161 | 1.092 | 0.962 | 1.085 | 0.987 |
| 93191_at   | 0.194 | 1.116 | 0.994 | 0.999 | 1.122 |
| 93193_at   | 0.481 | 1.188 | 1.222 | 1.102 | 1.193 |
| 93194_at   | 0.478 | 0.896 | 0.880 | 0.902 | 0.901 |
| 93195_at   | 0.329 | 1.169 | 1.113 | 1.072 | 1.093 |
| 93196_at   | 0.280 | 0.933 | 0.895 | 1.024 | 0.962 |
| 93197_at   | 0.481 | 0.889 | 0.884 | 0.942 | 0.858 |
| 93198_at   | 0.115 | 0.875 | 1.043 | 0.971 | 0.994 |
| 93199_at   | 0.431 | 0.873 | 0.843 | 0.927 | 0.875 |
| 93200_f_at | 0.182 | 0.865 | 0.872 | 0.910 | 0.947 |
| 93201_at   | 0.293 | 0.932 | 0.868 | 0.973 | 0.979 |
| 93202_at   | 0.206 | 0.792 | 0.890 | 0.942 | 0.978 |
| 93203_f_at | 0.259 | 1.195 | 1.104 | 1.030 | 1.112 |
| 93204_r_at | 0.434 | 0.954 | 0.947 | 0.988 | 0.955 |
| 93205_at   | 0.385 | 0.892 | 0.914 | 0.983 | 0.876 |
| 93206_g_at | 0.256 | 0.790 | 0.893 | 1.005 | 0.819 |
| 93207_at   | 0.393 | 0.851 | 0.846 | 0.949 | 0.869 |
| 93208_at   | 0.486 | 0.963 | 0.957 | 0.985 | 0.950 |
| 93209_at   | 0.160 | 0.956 | 0.865 | 0.972 | 0.941 |
| 93210_g_at | 0.248 | 0.956 | 0.931 | 0.969 | 1.003 |
| 93211_at   | 0.209 | 0.838 | 0.893 | 0.952 | 0.890 |
| 93212_at   | 0.272 | 0.716 | 0.971 | 0.885 | 0.962 |
| 93213_at   | 0.101 | 1.029 | 1.175 | 1.007 | 0.957 |
| 93214_at   | 0.322 | 0.982 | 1.084 | 1.043 | 1.101 |
| 93215_at   | 0.238 | 0.874 | 1.100 | 1.015 | 1.182 |
| 93216_at   | 0.289 | 0.869 | 0.873 | 0.964 | 0.880 |
| 93217_at   | 0.490 | 1.117 | 1.127 | 1.082 | 1.130 |
| 93218_at   | 0.249 | 0.793 | 0.832 | 0.883 | 0.967 |
| 93219_at   | 0.105 | 0.822 | 0.872 | 0.828 | 0.990 |
| 93220_at   | 0.352 | 0.898 | 0.936 | 0.950 | 0.992 |
| 93221_at   | 0.110 | 0.883 | 0.835 | 0.933 | 0.823 |
| 93222_at   | 0.198 | 0.857 | 0.904 | 0.987 | 0.928 |
| 93223_at   | 0.406 | 0.810 | 0.824 | 0.863 | 0.845 |
| 93224_at   | 0.474 | 0.833 | 0.792 | 0.866 | 0.769 |
| 93225_s_at | 0.334 | 0.888 | 0.866 | 0.964 | 0.885 |
| 93226_i_at | 0.373 | 0.961 | 1.170 | 0.978 | 0.959 |
| 93227_f_at | 0.147 | 1.034 | 1.751 | 0.860 | 0.877 |
| 93228_at   | 0.169 | 0.983 | 1.068 | 0.962 | 1.009 |
| 93230_at   | 0.421 | 0.799 | 0.797 | 0.862 | 0.739 |
| 93231_at   | 0.057 | 0.851 | 0.858 | 1.030 | 0.843 |
| 93232_at   | 0.345 | 0.936 | 0.914 | 0.911 | 0.946 |

|            |       |       |       |       |       |
|------------|-------|-------|-------|-------|-------|
| 93234_at   | 0.502 | 0.938 | 0.912 | 0.942 | 0.909 |
| 93235_at   | 0.117 | 0.996 | 1.021 | 1.088 | 1.175 |
| 93236_s_at | 0.095 | 0.899 | 1.040 | 0.953 | 1.024 |
| 93237_s_at | 0.069 | 0.950 | 1.066 | 0.966 | 1.013 |
| 93238_at   | 0.283 | 0.920 | 0.897 | 0.962 | 0.909 |
| 93240_f_at | 0.130 | 1.468 | 1.384 | 1.100 | 1.432 |
| 93241_r_at | 0.293 | 1.097 | 1.029 | 1.047 | 1.114 |
| 93242_at   | 0.331 | 0.882 | 0.864 | 0.955 | 0.873 |
| 93243_at   | 0.475 | 0.975 | 0.936 | 1.008 | 0.937 |
| 93244_at   | 0.400 | 0.858 | 0.867 | 0.871 | 0.845 |
| 93245_at   | 0.472 | 0.911 | 0.903 | 0.959 | 0.918 |
| 93246_at   | 0.244 | 1.107 | 1.138 | 0.998 | 1.304 |
| 93248_at   | 0.184 | 0.947 | 0.933 | 0.896 | 0.932 |
| 93250_r_at | 0.086 | 1.193 | 1.349 | 1.038 | 1.398 |
| 93251_at   | 0.468 | 0.917 | 0.893 | 0.924 | 0.860 |
| 93252_at   | 0.480 | 1.050 | 1.043 | 1.015 | 1.043 |
| 93253_at   | 0.249 | 1.037 | 1.137 | 0.992 | 1.080 |
| 93254_at   | 0.499 | 1.131 | 1.164 | 1.059 | 1.164 |
| 93255_at   | 0.097 | 1.186 | 1.105 | 1.076 | 1.048 |
| 93256_at   | 0.385 | 0.983 | 0.975 | 0.925 | 1.012 |
| 93257_at   | 0.507 | 1.109 | 1.131 | 1.073 | 1.121 |
| 93258_at   | 0.103 | 0.983 | 1.096 | 1.025 | 0.962 |
| 93259_at   | 0.486 | 0.971 | 0.927 | 1.005 | 0.958 |
| 93261_at   | 0.035 | 1.268 | 1.728 | 1.037 | 1.367 |
| 93264_at   | 0.100 | 1.089 | 0.997 | 1.181 | 0.952 |
| 93265_at   | 0.411 | 0.912 | 0.831 | 0.887 | 0.826 |
| 93266_at   | 0.434 | 0.893 | 0.836 | 0.927 | 0.871 |
| 93267_at   | 0.348 | 1.230 | 1.154 | 1.006 | 1.149 |
| 93268_at   | 0.346 | 1.184 | 1.275 | 1.042 | 1.374 |
| 93269_at   | 0.231 | 1.132 | 1.143 | 1.006 | 1.119 |
| 93270_at   | 0.433 | 1.104 | 1.147 | 1.032 | 1.094 |
| 93271_s_at | 0.058 | 1.029 | 0.983 | 1.120 | 0.978 |
| 93272_at   | 0.398 | 1.028 | 0.990 | 0.950 | 1.016 |
| 93273_at   | 0.307 | 1.077 | 1.277 | 1.078 | 1.298 |
| 93274_at   | 0.310 | 1.334 | 1.261 | 0.958 | 1.302 |
| 93275_at   | 0.422 | 0.921 | 0.935 | 0.961 | 0.952 |
| 93276_at   | 0.121 | 1.065 | 1.174 | 1.001 | 1.201 |
| 93277_at   | 0.220 | 1.059 | 0.962 | 1.003 | 0.894 |
| 93278_at   | 0.356 | 1.123 | 1.156 | 1.098 | 1.261 |
| 93279_at   | 0.497 | 0.889 | 0.837 | 0.908 | 0.802 |
| 93281_at   | 0.342 | 1.381 | 1.317 | 1.114 | 1.346 |
| 93282_at   | 0.266 | 0.925 | 0.866 | 1.004 | 0.895 |
| 93283_at   | 0.178 | 1.039 | 1.062 | 0.986 | 1.089 |
| 93284_at   | 0.155 | 1.125 | 1.166 | 1.010 | 1.347 |
| 93285_at   | 0.475 | 1.091 | 1.050 | 1.006 | 1.183 |
| 93287_at   | 0.164 | 0.971 | 0.889 | 0.971 | 0.948 |
| 93288_at   | 0.405 | 1.207 | 1.276 | 1.085 | 1.203 |

|            |       |       |       |       |       |
|------------|-------|-------|-------|-------|-------|
| 93290_at   | 0.331 | 1.040 | 1.149 | 1.003 | 1.082 |
| 93293_at   | 0.151 | 1.069 | 1.082 | 0.990 | 1.169 |
| 93294_at   | 0.428 | 1.214 | 1.072 | 1.047 | 1.267 |
| 93295_at   | 0.184 | 1.208 | 1.292 | 1.069 | 1.246 |
| 93296_at   | 0.240 | 0.868 | 0.826 | 0.924 | 0.890 |
| 93298_at   | 0.145 | 0.982 | 1.077 | 0.973 | 1.050 |
| 93299_at   | 0.331 | 0.878 | 0.871 | 0.911 | 0.936 |
| 93300_at   | 0.232 | 1.015 | 0.887 | 1.011 | 1.023 |
| 93301_at   | 0.093 | 1.087 | 0.982 | 0.991 | 1.024 |
| 93302_at   | 0.022 | 1.523 | 5.031 | 1.111 | 2.382 |
| 93303_at   | 0.388 | 0.994 | 1.031 | 1.029 | 1.019 |
| 93304_at   | 0.387 | 0.845 | 0.837 | 0.922 | 0.850 |
| 93305_f_at | 0.081 | 1.172 | 1.085 | 0.953 | 1.139 |
| 93306_at   | 0.204 | 1.204 | 1.212 | 1.012 | 1.176 |
| 93308_s_at | 0.163 | 1.051 | 1.279 | 1.370 | 1.029 |
| 93309_at   | 0.323 | 1.075 | 1.148 | 0.939 | 1.212 |
| 93310_at   | 0.275 | 1.142 | 1.281 | 1.003 | 1.315 |
| 93311_at   | 0.279 | 1.161 | 1.039 | 1.010 | 1.140 |
| 93312_at   | 0.322 | 1.202 | 1.243 | 1.028 | 1.228 |
| 93313_at   | 0.349 | 0.874 | 0.877 | 0.953 | 0.864 |
| 93314_g_at | 0.445 | 0.929 | 0.925 | 0.981 | 0.912 |
| 93315_at   | 0.306 | 1.168 | 1.140 | 1.115 | 1.076 |
| 93316_at   | 0.299 | 1.434 | 1.289 | 1.344 | 1.374 |
| 93317_at   | 0.417 | 0.877 | 0.851 | 0.919 | 0.886 |
| 93318_at   | 0.445 | 0.874 | 0.913 | 0.930 | 0.873 |
| 93319_at   | 0.409 | 1.038 | 1.164 | 0.961 | 1.051 |
| 93320_at   | 0.140 | 1.169 | 1.152 | 0.990 | 1.328 |
| 93321_at   | 0.363 | 1.177 | 1.119 | 0.982 | 1.101 |
| 93322_at   | 0.124 | 0.898 | 0.855 | 0.932 | 0.824 |
| 93323_at   | 0.215 | 1.058 | 1.173 | 1.091 | 1.171 |
| 93324_at   | 0.117 | 1.252 | 1.099 | 0.963 | 1.094 |
| 93325_at   | 0.323 | 1.053 | 1.138 | 0.961 | 1.251 |
| 93326_at   | 0.419 | 1.144 | 1.128 | 1.050 | 1.172 |
| 93327_at   | 0.343 | 1.030 | 1.075 | 1.061 | 1.175 |
| 93328_at   | 0.230 | 1.310 | 1.337 | 1.101 | 1.339 |
| 93330_at   | 0.290 | 1.000 | 0.927 | 1.026 | 1.118 |
| 93332_at   | 0.330 | 1.115 | 1.110 | 1.019 | 1.044 |
| 93333_at   | 0.159 | 1.143 | 1.138 | 0.970 | 1.298 |
| 93334_at   | 0.496 | 0.990 | 0.932 | 0.993 | 0.934 |
| 93336_at   | 0.231 | 0.968 | 1.100 | 1.006 | 0.997 |
| 93337_at   | 0.192 | 1.337 | 1.376 | 1.047 | 1.405 |
| 93338_at   | 0.454 | 0.946 | 0.921 | 0.980 | 0.940 |
| 93339_at   | 0.410 | 1.065 | 1.019 | 0.974 | 1.037 |
| 93340_f_at | 0.287 | 1.335 | 1.396 | 1.160 | 1.121 |
| 93341_r_at | 0.165 | 0.993 | 1.074 | 0.972 | 0.935 |
| 93342_at   | 0.330 | 1.127 | 1.117 | 1.031 | 1.143 |
| 93346_at   | 0.203 | 1.100 | 1.299 | 1.105 | 1.108 |

|            |       |       |       |       |       |
|------------|-------|-------|-------|-------|-------|
| 93347_at   | 0.505 | 1.162 | 1.210 | 1.043 | 1.232 |
| 93348_at   | 0.433 | 0.974 | 1.005 | 0.987 | 1.026 |
| 93349_at   | 0.490 | 0.961 | 0.967 | 0.991 | 0.991 |
| 93350_f_at | 0.145 | 0.884 | 0.911 | 0.983 | 0.976 |
| 93351_at   | 0.177 | 1.210 | 0.992 | 1.150 | 1.333 |
| 93352_at   | 0.363 | 0.900 | 0.877 | 0.852 | 0.935 |
| 93353_at   | 0.287 | 0.910 | 0.793 | 1.461 | 0.850 |
| 93354_at   | 0.261 | 0.997 | 0.919 | 1.223 | 1.109 |
| 93355_at   | 0.422 | 0.805 | 0.761 | 0.809 | 0.716 |
| 93356_at   | 0.022 | 1.010 | 1.093 | 0.974 | 1.067 |
| 93358_at   | 0.327 | 1.020 | 1.124 | 0.987 | 1.104 |
| 93359_at   | 0.505 | 0.922 | 0.912 | 0.931 | 0.895 |
| 93360_at   | 0.410 | 0.991 | 1.003 | 1.053 | 0.950 |
| 93362_at   | 0.045 | 1.099 | 1.189 | 1.023 | 1.075 |
| 93364_at   | 0.218 | 1.209 | 1.096 | 1.046 | 1.147 |
| 93365_s_at | 0.177 | 1.102 | 1.113 | 0.978 | 1.147 |
| 93366_r_at | 0.386 | 0.958 | 0.965 | 0.993 | 1.005 |
| 93367_at   | 0.321 | 1.060 | 1.081 | 1.003 | 1.052 |
| 93369_at   | 0.282 | 0.955 | 0.919 | 0.991 | 0.938 |
| 93370_at   | 0.359 | 1.130 | 1.011 | 1.110 | 1.040 |
| 93371_at   | 0.443 | 0.955 | 0.901 | 0.882 | 0.894 |
| 93372_at   | 0.403 | 1.006 | 1.032 | 1.010 | 1.124 |
| 93373_at   | 0.478 | 1.132 | 1.170 | 1.099 | 1.163 |
| 93374_at   | 0.277 | 0.868 | 0.843 | 0.913 | 0.869 |
| 93375_at   | 0.352 | 0.917 | 0.881 | 0.963 | 0.932 |
| 93376_at   | 0.154 | 1.106 | 1.213 | 0.962 | 1.083 |
| 93378_at   | 0.368 | 0.919 | 0.870 | 0.971 | 0.949 |
| 93379_at   | 0.405 | 0.873 | 0.815 | 0.914 | 0.799 |
| 93380_at   | 0.465 | 0.826 | 0.780 | 0.881 | 0.788 |
| 93381_at   | 0.379 | 0.828 | 0.830 | 0.913 | 0.856 |
| 93382_at   | 0.454 | 0.965 | 0.977 | 1.003 | 0.942 |
| 93383_at   | 0.206 | 0.913 | 0.871 | 0.956 | 0.884 |
| 93384_at   | 0.302 | 0.932 | 0.918 | 1.007 | 0.958 |
| 93385_at   | 0.213 | 0.941 | 0.894 | 0.944 | 0.945 |
| 93386_at   | 0.343 | 0.949 | 0.844 | 0.958 | 0.897 |
| 93387_at   | 0.101 | 0.942 | 0.935 | 1.043 | 0.919 |
| 93388_s_at | 0.383 | 0.825 | 0.841 | 0.897 | 0.802 |
| 93389_at   | 0.238 | 1.220 | 1.163 | 1.189 | 0.969 |
| 93390_g_at | 0.273 | 1.203 | 1.009 | 1.051 | 0.877 |
| 93391_at   | 0.407 | 0.941 | 0.909 | 1.006 | 0.960 |
| 93392_at   | 0.228 | 0.875 | 0.878 | 1.046 | 0.862 |
| 93393_at   | 0.276 | 0.828 | 0.758 | 0.864 | 0.788 |
| 93394_at   | 0.445 | 0.960 | 0.954 | 0.994 | 0.958 |
| 93395_g_at | 0.351 | 0.833 | 0.866 | 0.936 | 0.830 |
| 93396_at   | 0.386 | 1.073 | 1.052 | 0.977 | 1.070 |
| 93397_at   | 0.161 | 1.298 | 1.563 | 1.164 | 1.550 |
| 93398_at   | 0.445 | 0.899 | 0.907 | 0.947 | 0.889 |

|            |       |       |       |       |       |
|------------|-------|-------|-------|-------|-------|
| 93399_at   | 0.429 | 0.983 | 0.997 | 1.026 | 1.007 |
| 93400_at   | 0.417 | 0.866 | 0.886 | 0.927 | 0.924 |
| 93401_g_at | 0.387 | 0.936 | 0.957 | 0.984 | 0.945 |
| 93402_i_at | 0.322 | 0.769 | 0.711 | 0.879 | 0.866 |
| 93403_at   | 0.325 | 0.995 | 1.157 | 1.226 | 1.184 |
| 93404_g_at | 0.278 | 0.903 | 0.952 | 1.031 | 0.985 |
| 93405_at   | 0.478 | 0.942 | 0.928 | 0.951 | 0.942 |
| 93406_at   | 0.443 | 0.927 | 0.919 | 0.953 | 0.949 |
| 93407_at   | 0.436 | 0.886 | 0.867 | 0.934 | 0.848 |
| 93408_at   | 0.315 | 1.032 | 0.962 | 1.064 | 0.990 |
| 93409_at   | 0.355 | 0.833 | 0.820 | 0.930 | 0.854 |
| 93410_at   | 0.467 | 0.911 | 0.881 | 0.891 | 0.895 |
| 93411_at   | 0.443 | 1.183 | 1.120 | 1.166 | 1.247 |
| 93412_at   | 0.412 | 0.892 | 0.844 | 0.937 | 0.850 |
| 93413_at   | 0.458 | 1.107 | 1.049 | 1.083 | 1.109 |
| 93414_at   | 0.320 | 0.983 | 0.928 | 0.968 | 0.937 |
| 93416_at   | 0.468 | 0.905 | 0.920 | 0.925 | 0.928 |
| 93417_at   | 0.424 | 0.895 | 0.838 | 0.953 | 0.877 |
| 93418_g_at | 0.400 | 0.909 | 0.861 | 0.938 | 0.822 |
| 93419_at   | 0.391 | 0.863 | 0.831 | 0.913 | 0.842 |
| 93421_at   | 0.328 | 1.301 | 1.206 | 1.115 | 1.223 |
| 93422_at   | 0.290 | 0.857 | 0.899 | 0.971 | 0.937 |
| 93423_at   | 0.314 | 0.899 | 0.899 | 0.981 | 0.905 |
| 93424_at   | 0.256 | 1.344 | 1.257 | 1.039 | 1.268 |
| 93425_at   | 0.168 | 1.001 | 1.106 | 0.950 | 1.030 |
| 93426_at   | 0.440 | 1.150 | 1.189 | 1.032 | 1.170 |
| 93427_at   | 0.159 | 1.140 | 1.058 | 1.137 | 1.033 |
| 93428_at   | 0.337 | 0.892 | 0.815 | 0.933 | 0.877 |
| 93429_at   | 0.307 | 0.864 | 0.865 | 0.954 | 0.856 |
| 93430_at   | 0.361 | 1.109 | 1.217 | 1.140 | 1.404 |
| 93431_at   | 0.053 | 1.120 | 1.021 | 1.337 | 0.853 |
| 93432_at   | 0.281 | 0.962 | 0.890 | 0.933 | 0.910 |
| 93433_s_at | 0.114 | 0.877 | 0.762 | 0.879 | 0.831 |
| 93434_at   | 0.365 | 1.007 | 0.943 | 1.043 | 1.001 |
| 93435_at   | 0.402 | 0.925 | 0.861 | 0.927 | 0.889 |
| 93436_i_at | 0.376 | 0.959 | 1.009 | 0.981 | 1.074 |
| 93437_f_at | 0.251 | 1.118 | 1.143 | 1.038 | 1.209 |
| 93439_f_at | 0.073 | 1.253 | 1.104 | 0.961 | 1.218 |
| 93440_at   | 0.099 | 1.156 | 1.249 | 1.048 | 1.159 |
| 93441_at   | 0.256 | 1.014 | 1.062 | 1.044 | 1.098 |
| 93442_at   | 0.224 | 0.935 | 0.847 | 1.024 | 0.892 |
| 93443_at   | 0.072 | 0.958 | 0.841 | 1.032 | 0.967 |
| 93444_at   | 0.306 | 0.843 | 0.904 | 0.880 | 0.896 |
| 93445_at   | 0.286 | 0.972 | 1.046 | 1.001 | 0.949 |
| 93446_at   | 0.403 | 0.974 | 0.967 | 0.988 | 1.029 |
| 93447_at   | 0.250 | 0.921 | 0.880 | 0.972 | 0.839 |
| 93448_at   | 0.366 | 0.965 | 1.000 | 0.974 | 0.937 |

|            |       |       |       |       |       |
|------------|-------|-------|-------|-------|-------|
| 93449_at   | 0.204 | 0.862 | 0.881 | 0.992 | 0.892 |
| 93450_at   | 0.328 | 0.987 | 0.923 | 0.936 | 0.930 |
| 93451_at   | 0.178 | 1.186 | 1.091 | 1.014 | 1.080 |
| 93452_at   | 0.274 | 0.927 | 0.958 | 0.925 | 0.948 |
| 93453_at   | 0.296 | 1.002 | 1.065 | 1.024 | 0.997 |
| 93454_at   | 0.244 | 1.196 | 1.103 | 1.138 | 1.064 |
| 93455_s_at | 0.255 | 1.039 | 0.956 | 1.014 | 0.977 |
| 93456_r_at | 0.075 | 1.276 | 0.862 | 1.006 | 1.150 |
| 93457_at   | 0.381 | 0.892 | 0.862 | 0.910 | 0.930 |
| 93458_at   | 0.480 | 0.919 | 0.919 | 0.929 | 0.898 |
| 93459_s_at | 0.445 | 0.869 | 0.937 | 0.917 | 1.007 |
| 93460_at   | 0.204 | 0.920 | 0.854 | 0.989 | 0.902 |
| 93461_at   | 0.376 | 0.859 | 0.885 | 0.886 | 0.879 |
| 93462_at   | 0.359 | 0.986 | 0.997 | 1.021 | 1.056 |
| 93463_at   | 0.155 | 0.810 | 0.822 | 0.998 | 0.895 |
| 93464_at   | 0.311 | 1.159 | 0.915 | 1.017 | 1.122 |
| 93465_at   | 0.111 | 0.832 | 1.044 | 0.847 | 0.873 |
| 93466_at   | 0.179 | 0.861 | 0.914 | 0.948 | 0.942 |
| 93467_at   | 0.089 | 1.000 | 0.818 | 0.921 | 0.886 |
| 93468_at   | 0.389 | 0.983 | 1.013 | 1.036 | 1.028 |
| 93469_at   | 0.151 | 1.013 | 0.944 | 1.035 | 0.964 |
| 93470_at   | 0.322 | 0.971 | 1.015 | 0.961 | 1.049 |
| 93471_at   | 0.488 | 1.101 | 1.184 | 1.060 | 1.148 |
| 93472_at   | 0.248 | 0.953 | 0.889 | 1.009 | 0.988 |
| 93475_at   | 0.276 | 1.224 | 1.055 | 1.047 | 1.118 |
| 93476_at   | 0.488 | 1.088 | 1.114 | 1.031 | 1.084 |
| 93478_at   | 0.403 | 0.952 | 0.985 | 0.949 | 0.995 |
| 93479_at   | 0.256 | 1.057 | 1.153 | 1.074 | 1.017 |
| 93480_at   | 0.474 | 0.936 | 0.908 | 0.965 | 0.868 |
| 93481_at   | 0.047 | 1.279 | 1.073 | 1.162 | 1.040 |
| 93482_at   | 0.314 | 1.227 | 1.289 | 1.186 | 1.185 |
| 93483_at   | 0.126 | 1.151 | 1.331 | 1.001 | 1.340 |
| 93484_at   | 0.400 | 0.887 | 0.920 | 0.938 | 0.869 |
| 93485_at   | 0.463 | 1.118 | 1.088 | 1.079 | 1.141 |
| 93486_at   | 0.188 | 0.917 | 0.861 | 1.174 | 0.926 |
| 93488_at   | 0.147 | 1.282 | 1.451 | 1.074 | 1.275 |
| 93489_at   | 0.505 | 0.901 | 0.900 | 0.927 | 0.896 |
| 93490_at   | 0.312 | 0.955 | 0.907 | 0.913 | 0.945 |
| 93491_f_at | 0.154 | 1.213 | 1.234 | 0.977 | 1.225 |
| 93492_at   | 0.187 | 1.028 | 0.963 | 0.954 | 0.999 |
| 93493_at   | 0.216 | 1.410 | 1.335 | 1.053 | 1.223 |
| 93495_at   | 0.043 | 1.163 | 1.407 | 1.065 | 1.250 |
| 93496_at   | 0.253 | 1.205 | 1.147 | 1.158 | 1.229 |
| 93497_at   | 0.035 | 1.547 | 2.857 | 1.270 | 1.853 |
| 93498_s_at | 0.349 | 1.074 | 1.134 | 1.073 | 1.230 |
| 93499_at   | 0.202 | 1.076 | 1.326 | 1.086 | 1.234 |
| 93500_at   | 0.145 | 1.443 | 1.177 | 1.382 | 1.161 |



|            |       |       |       |       |       |
|------------|-------|-------|-------|-------|-------|
| 93501_f_at | 0.472 | 1.138 | 1.162 | 1.213 | 1.168 |
| 93502_r_at | 0.456 | 1.034 | 1.018 | 1.045 | 1.037 |
| 93503_at   | 0.072 | 1.093 | 1.479 | 1.037 | 1.172 |
| 93505_at   | 0.429 | 0.991 | 0.945 | 1.001 | 0.955 |
| 93506_at   | 0.363 | 0.852 | 0.808 | 0.881 | 0.832 |
| 93507_at   | 0.154 | 0.747 | 0.871 | 1.023 | 0.949 |
| 93509_at   | 0.181 | 1.046 | 0.955 | 1.039 | 1.018 |
| 93511_at   | 0.353 | 1.248 | 1.060 | 1.047 | 1.209 |
| 93512_f_at | 0.495 | 1.098 | 1.129 | 0.999 | 1.145 |
| 93513_at   | 0.483 | 0.875 | 0.879 | 0.926 | 0.883 |
| 93514_at   | 0.283 | 0.737 | 0.671 | 1.493 | 0.736 |
| 93515_at   | 0.206 | 1.011 | 0.957 | 0.893 | 1.122 |
| 93516_at   | 0.463 | 0.859 | 0.838 | 0.922 | 0.840 |
| 93517_at   | 0.292 | 1.225 | 1.845 | 1.273 | 1.240 |
| 93518_at   | 0.153 | 1.012 | 1.082 | 0.990 | 1.054 |
| 93519_s_at | 0.168 | 0.980 | 1.053 | 0.969 | 1.135 |
| 93520_at   | 0.343 | 0.865 | 0.857 | 0.885 | 0.906 |
| 93521_at   | 0.169 | 1.201 | 1.114 | 1.032 | 1.125 |
| 93522_at   | 0.376 | 0.962 | 0.994 | 1.040 | 0.987 |
| 93523_at   | 0.365 | 1.014 | 0.992 | 1.070 | 0.979 |
| 93524_i_at | 0.403 | 0.953 | 0.954 | 0.967 | 0.909 |
| 93525_f_at | 0.353 | 0.980 | 0.988 | 0.947 | 0.966 |
| 93526_at   | 0.389 | 0.871 | 0.830 | 0.917 | 0.837 |
| 93527_at   | 0.077 | 0.906 | 0.877 | 1.074 | 0.994 |
| 93528_s_at | 0.284 | 1.124 | 0.935 | 0.904 | 1.117 |
| 93529_at   | 0.354 | 1.095 | 1.136 | 1.040 | 1.198 |
| 93530_at   | 0.309 | 0.982 | 0.955 | 0.933 | 1.060 |
| 93531_at   | 0.445 | 1.038 | 1.027 | 1.034 | 1.068 |
| 93532_at   | 0.322 | 0.930 | 0.905 | 1.065 | 0.902 |
| 93533_at   | 0.244 | 1.074 | 1.246 | 1.039 | 1.123 |
| 93534_at   | 0.139 | 0.973 | 0.741 | 1.397 | 0.755 |
| 93535_at   | 0.222 | 1.246 | 1.079 | 1.073 | 1.139 |
| 93536_at   | 0.130 | 1.026 | 1.080 | 0.936 | 1.074 |
| 93538_at   | 0.077 | 1.045 | 1.034 | 0.898 | 1.022 |
| 93539_at   | 0.209 | 1.045 | 1.036 | 0.987 | 1.110 |
| 93540_at   | 0.294 | 1.061 | 1.043 | 1.031 | 1.101 |
| 93541_at   | 0.220 | 1.101 | 1.278 | 1.208 | 0.996 |
| 93542_at   | 0.272 | 0.897 | 0.954 | 0.957 | 0.957 |
| 93543_f_at | 0.022 | 0.939 | 0.793 | 0.968 | 0.868 |
| 93546_s_at | 0.220 | 1.150 | 1.215 | 1.040 | 1.206 |
| 93547_at   | 0.317 | 1.047 | 1.088 | 1.006 | 1.126 |
| 93548_at   | 0.132 | 0.905 | 1.151 | 0.859 | 1.022 |
| 93550_at   | 0.295 | 1.109 | 1.238 | 1.046 | 1.077 |
| 93551_at   | 0.184 | 1.097 | 1.107 | 1.017 | 1.080 |
| 93555_at   | 0.458 | 0.901 | 0.883 | 0.954 | 0.870 |
| 93556_at   | 0.293 | 0.871 | 0.920 | 0.945 | 0.907 |
| 93557_at   | 0.233 | 1.087 | 1.134 | 1.219 | 1.133 |

|            |       |       |       |       |       |
|------------|-------|-------|-------|-------|-------|
| 93558_at   | 0.255 | 1.144 | 1.119 | 1.033 | 1.061 |
| 93559_at   | 0.197 | 0.896 | 1.019 | 0.896 | 1.011 |
| 93560_at   | 0.059 | 1.128 | 1.102 | 1.029 | 1.248 |
| 93561_at   | 0.338 | 0.860 | 0.820 | 0.916 | 0.778 |
| 93562_at   | 0.496 | 1.049 | 1.093 | 1.011 | 1.109 |
| 93563_s_at | 0.261 | 1.002 | 0.963 | 1.044 | 1.098 |
| 93564_at   | 0.390 | 0.921 | 0.901 | 0.887 | 0.898 |
| 93565_at   | 0.270 | 0.906 | 0.893 | 0.941 | 0.941 |
| 93566_at   | 0.400 | 0.851 | 0.768 | 0.871 | 0.840 |
| 93567_at   | 0.115 | 0.952 | 0.921 | 1.045 | 0.865 |
| 93568_i_at | 0.188 | 0.867 | 0.861 | 0.759 | 1.682 |
| 93569_f_at | 0.215 | 0.902 | 0.896 | 0.845 | 1.087 |
| 93570_at   | 0.478 | 0.830 | 0.813 | 0.848 | 0.843 |
| 93571_at   | 0.219 | 1.092 | 1.015 | 0.997 | 1.052 |
| 93572_at   | 0.465 | 1.045 | 1.103 | 1.198 | 1.107 |
| 93573_at   | 0.265 | 1.295 | 1.557 | 1.325 | 1.342 |
| 93574_at   | 0.205 | 0.989 | 0.872 | 1.255 | 0.962 |
| 93575_at   | 0.243 | 0.920 | 0.908 | 0.996 | 0.948 |
| 93578_at   | 0.282 | 0.861 | 0.821 | 0.880 | 0.775 |
| 93579_at   | 0.448 | 1.024 | 1.046 | 0.965 | 1.077 |
| 93580_at   | 0.125 | 1.202 | 1.180 | 1.014 | 1.169 |
| 93581_at   | 0.342 | 0.865 | 0.964 | 0.995 | 0.912 |
| 93582_at   | 0.206 | 1.035 | 1.184 | 1.021 | 1.169 |
| 93583_s_at | 0.026 | 1.686 | 4.248 | 0.769 | 1.369 |
| 93584_at   | 0.009 | 0.735 | 1.204 | 0.614 | 0.807 |
| 93585_at   | 0.387 | 0.949 | 0.900 | 0.959 | 0.912 |
| 93586_at   | 0.059 | 0.989 | 1.239 | 1.016 | 1.068 |
| 93587_at   | 0.405 | 0.948 | 0.939 | 0.999 | 0.937 |
| 93588_at   | 0.332 | 1.252 | 1.162 | 1.070 | 1.222 |
| 93589_at   | 0.200 | 0.991 | 0.950 | 1.008 | 0.950 |
| 93590_at   | 0.323 | 1.383 | 1.171 | 1.055 | 1.205 |
| 93591_at   | 0.210 | 0.953 | 0.929 | 1.025 | 0.975 |
| 93592_at   | 0.240 | 0.927 | 0.842 | 1.099 | 0.852 |
| 93593_f_at | 0.116 | 1.090 | 1.271 | 1.021 | 1.205 |
| 93594_r_at | 0.117 | 0.865 | 0.818 | 0.967 | 0.858 |
| 93595_at   | 0.424 | 1.167 | 1.291 | 1.127 | 1.294 |
| 93596_i_at | 0.244 | 1.064 | 1.158 | 0.911 | 1.157 |
| 93597_at   | 0.429 | 0.936 | 0.898 | 0.962 | 0.911 |
| 93598_at   | 0.091 | 0.900 | 1.015 | 0.877 | 1.001 |
| 93599_at   | 0.379 | 1.282 | 1.233 | 1.098 | 1.190 |
| 93600_at   | 0.490 | 1.071 | 1.155 | 1.054 | 1.128 |
| 93601_at   | 0.390 | 0.874 | 0.861 | 0.888 | 0.814 |
| 93602_at   | 0.147 | 1.105 | 1.098 | 1.096 | 1.009 |
| 93603_at   | 0.467 | 0.886 | 0.924 | 0.946 | 0.904 |
| 93604_f_at | 0.273 | 1.228 | 1.131 | 0.977 | 1.188 |
| 93605_r_at | 0.346 | 1.032 | 1.011 | 0.941 | 1.067 |
| 93606_s_at | 0.204 | 1.010 | 1.020 | 0.959 | 1.148 |

|            |       |       |       |       |       |
|------------|-------|-------|-------|-------|-------|
| 93608_at   | 0.328 | 0.840 | 0.815 | 0.922 | 0.858 |
| 93609_at   | 0.160 | 0.858 | 0.936 | 0.961 | 0.951 |
| 93611_at   | 0.470 | 0.836 | 0.798 | 0.887 | 0.816 |
| 93612_at   | 0.371 | 1.185 | 1.074 | 1.143 | 1.090 |
| 93613_at   | 0.121 | 0.879 | 0.888 | 1.020 | 0.901 |
| 93614_at   | 0.122 | 0.869 | 0.860 | 0.944 | 0.938 |
| 93615_at   | 0.297 | 1.562 | 1.491 | 1.272 | 1.484 |
| 93616_g_at | 0.454 | 0.989 | 1.004 | 0.998 | 1.068 |
| 93617_at   | 0.160 | 0.956 | 0.834 | 0.893 | 0.954 |
| 93618_at   | 0.218 | 0.867 | 0.851 | 0.967 | 0.882 |
| 93619_at   | 0.458 | 1.175 | 1.217 | 1.088 | 1.264 |
| 93620_at   | 0.344 | 1.036 | 1.003 | 1.048 | 1.006 |
| 93621_at   | 0.486 | 0.918 | 0.915 | 0.960 | 0.921 |
| 93622_at   | 0.221 | 0.888 | 0.888 | 1.013 | 0.897 |
| 93623_at   | 0.247 | 1.023 | 0.935 | 0.995 | 0.960 |
| 93624_at   | 0.139 | 1.079 | 0.812 | 1.012 | 1.089 |
| 93625_at   | 0.359 | 0.863 | 0.893 | 0.989 | 0.866 |
| 93626_at   | 0.273 | 1.140 | 1.132 | 1.058 | 1.333 |
| 93627_at   | 0.195 | 1.156 | 1.157 | 0.964 | 1.103 |
| 93628_at   | 0.276 | 0.974 | 0.976 | 1.065 | 1.008 |
| 93629_s_at | 0.164 | 0.955 | 1.017 | 1.000 | 1.003 |
| 93630_at   | 0.272 | 0.806 | 0.850 | 0.920 | 0.876 |
| 93631_at   | 0.241 | 0.869 | 0.817 | 0.955 | 0.843 |
| 93632_g_at | 0.214 | 0.797 | 0.906 | 0.956 | 0.939 |
| 93633_at   | 0.378 | 0.902 | 0.860 | 0.908 | 0.898 |
| 93634_at   | 0.205 | 0.899 | 0.953 | 1.032 | 1.012 |
| 93635_at   | 0.308 | 0.991 | 0.943 | 0.956 | 0.923 |
| 93636_at   | 0.246 | 0.953 | 0.892 | 1.002 | 0.962 |
| 93637_at   | 0.211 | 0.935 | 0.976 | 0.910 | 0.938 |
| 93638_s_at | 0.082 | 0.997 | 2.550 | 0.833 | 1.050 |
| 93639_r_at | 0.272 | 0.845 | 0.802 | 0.930 | 0.885 |
| 93640_s_at | 0.470 | 0.976 | 0.969 | 1.019 | 0.971 |
| 93642_at   | 0.458 | 0.891 | 0.834 | 0.904 | 0.822 |
| 93643_at   | 0.445 | 0.868 | 0.854 | 0.929 | 0.851 |
| 93644_at   | 0.312 | 0.890 | 0.873 | 0.984 | 0.913 |
| 93645_at   | 0.092 | 0.902 | 0.886 | 1.003 | 0.923 |
| 93646_at   | 0.246 | 0.844 | 0.851 | 0.949 | 0.876 |
| 93647_at   | 0.468 | 1.039 | 1.005 | 1.066 | 1.022 |
| 93648_at   | 0.341 | 0.907 | 0.841 | 0.977 | 0.908 |
| 93649_f_at | 0.309 | 0.847 | 0.815 | 0.935 | 0.865 |
| 93650_i_at | 0.350 | 0.864 | 0.805 | 0.923 | 0.836 |
| 93651_r_at | 0.303 | 0.861 | 0.816 | 0.961 | 0.812 |
| 93652_i_at | 0.359 | 0.948 | 0.885 | 0.987 | 0.929 |
| 93653_r_at | 0.486 | 0.813 | 0.776 | 0.878 | 0.790 |
| 93654_at   | 0.371 | 0.908 | 0.839 | 0.962 | 0.901 |
| 93655_at   | 0.351 | 0.884 | 0.865 | 0.961 | 0.871 |
| 93656_g_at | 0.288 | 1.074 | 1.042 | 1.039 | 1.061 |

|            |       |       |       |       |       |
|------------|-------|-------|-------|-------|-------|
| 93657_at   | 0.127 | 0.891 | 0.999 | 0.934 | 0.918 |
| 93658_at   | 0.434 | 0.996 | 0.954 | 0.978 | 0.945 |
| 93659_at   | 0.363 | 0.959 | 0.936 | 1.026 | 0.956 |
| 93660_at   | 0.359 | 0.844 | 0.832 | 0.952 | 0.836 |
| 93661_at   | 0.075 | 0.908 | 1.004 | 0.919 | 0.930 |
| 93662_s_at | 0.125 | 0.968 | 1.111 | 0.907 | 1.056 |
| 93663_r_at | 0.361 | 0.898 | 0.857 | 0.962 | 0.885 |
| 93664_at   | 0.342 | 0.811 | 0.776 | 0.913 | 0.785 |
| 93665_at   | 0.477 | 0.863 | 0.800 | 0.901 | 0.842 |
| 93666_at   | 0.231 | 0.880 | 0.912 | 0.882 | 0.972 |
| 93667_at   | 0.362 | 1.048 | 1.094 | 1.047 | 0.996 |
| 93668_at   | 0.465 | 0.827 | 0.791 | 0.876 | 0.822 |
| 93669_f_at | 0.397 | 0.999 | 0.968 | 0.979 | 1.017 |
| 93670_at   | 0.148 | 1.062 | 0.989 | 1.070 | 0.889 |
| 93671_at   | 0.282 | 0.886 | 0.832 | 0.948 | 0.838 |
| 93672_at   | 0.481 | 0.951 | 0.917 | 0.948 | 0.911 |
| 93673_at   | 0.384 | 0.911 | 0.915 | 0.990 | 0.940 |
| 93674_at   | 0.310 | 0.870 | 0.801 | 0.903 | 0.847 |
| 93675_at   | 0.180 | 0.997 | 0.906 | 0.979 | 0.979 |
| 93676_at   | 0.122 | 0.884 | 0.887 | 0.926 | 0.994 |
| 93677_at   | 0.204 | 0.802 | 0.849 | 0.796 | 0.859 |
| 93678_s_at | 0.475 | 0.917 | 0.923 | 0.920 | 0.896 |
| 93679_at   | 0.440 | 0.897 | 0.869 | 0.914 | 0.907 |
| 93680_at   | 0.495 | 1.123 | 1.130 | 1.040 | 1.166 |
| 93681_at   | 0.142 | 0.990 | 0.887 | 1.001 | 0.995 |
| 93682_at   | 0.322 | 0.998 | 0.916 | 0.973 | 0.897 |
| 93683_at   | 0.189 | 1.011 | 0.994 | 1.058 | 1.025 |
| 93685_at   | 0.390 | 0.869 | 0.865 | 0.925 | 0.884 |
| 93686_s_at | 0.170 | 0.842 | 0.854 | 0.937 | 0.903 |
| 93687_r_at | 0.497 | 0.896 | 0.891 | 0.928 | 0.881 |
| 93688_at   | 0.349 | 0.916 | 0.999 | 0.974 | 0.968 |
| 93689_at   | 0.454 | 0.891 | 0.847 | 0.945 | 0.852 |
| 93690_at   | 0.188 | 0.838 | 0.829 | 0.973 | 0.891 |
| 93691_s_at | 0.120 | 0.814 | 0.809 | 1.001 | 0.846 |
| 93692_f_at | 0.497 | 0.923 | 0.895 | 0.949 | 0.916 |
| 93693_at   | 0.105 | 1.310 | 1.105 | 1.013 | 1.121 |
| 93694_at   | 0.220 | 1.264 | 1.035 | 1.187 | 1.183 |
| 93695_at   | 0.290 | 0.861 | 0.839 | 1.107 | 0.858 |
| 93696_at   | 0.406 | 0.947 | 0.907 | 0.976 | 0.877 |
| 93697_at   | 0.204 | 1.447 | 1.334 | 1.231 | 1.196 |
| 93698_at   | 0.103 | 0.969 | 0.913 | 1.000 | 0.863 |
| 93699_at   | 0.444 | 1.007 | 0.970 | 0.982 | 0.948 |
| 93700_at   | 0.241 | 0.971 | 0.974 | 1.023 | 1.007 |
| 93701_at   | 0.313 | 0.924 | 0.963 | 0.913 | 0.975 |
| 93702_at   | 0.298 | 0.954 | 0.907 | 0.972 | 0.898 |
| 93703_at   | 0.468 | 0.908 | 0.859 | 0.944 | 0.899 |
| 93704_at   | 0.230 | 0.833 | 0.911 | 1.041 | 1.093 |

|            |       |       |       |       |       |
|------------|-------|-------|-------|-------|-------|
| 93705_at   | 0.317 | 1.100 | 1.013 | 1.033 | 1.076 |
| 93706_at   | 0.041 | 0.852 | 0.918 | 0.995 | 0.949 |
| 93707_f_at | 0.383 | 0.856 | 0.810 | 0.931 | 0.830 |
| 93708_at   | 0.304 | 0.995 | 1.021 | 1.064 | 1.042 |
| 93709_at   | 0.355 | 0.889 | 0.827 | 0.940 | 0.859 |
| 93710_at   | 0.448 | 0.896 | 0.880 | 0.967 | 0.888 |
| 93711_at   | 0.262 | 0.911 | 1.027 | 1.055 | 0.996 |
| 93712_at   | 0.223 | 0.927 | 0.918 | 1.025 | 0.871 |
| 93713_at   | 0.219 | 0.762 | 0.857 | 0.912 | 0.888 |
| 93714_f_at | 0.241 | 0.992 | 1.094 | 0.997 | 0.996 |
| 93715_at   | 0.297 | 0.878 | 0.880 | 0.972 | 0.909 |
| 93716_at   | 0.369 | 0.929 | 0.900 | 1.005 | 0.919 |
| 93717_at   | 0.076 | 0.928 | 1.327 | 0.937 | 1.010 |
| 93718_at   | 0.352 | 0.941 | 0.933 | 1.033 | 0.995 |
| 93719_at   | 0.355 | 0.862 | 0.817 | 0.941 | 0.894 |
| 93720_at   | 0.330 | 0.927 | 0.946 | 1.083 | 0.927 |
| 93721_at   | 0.231 | 0.783 | 0.893 | 0.915 | 0.934 |
| 93722_at   | 0.300 | 0.829 | 0.874 | 0.880 | 0.951 |
| 93723_at   | 0.357 | 0.849 | 0.760 | 0.903 | 0.809 |
| 93724_at   | 0.094 | 0.985 | 0.885 | 0.999 | 0.907 |
| 93725_at   | 0.271 | 0.930 | 0.980 | 0.973 | 0.880 |
| 93727_at   | 0.410 | 0.926 | 1.005 | 0.962 | 0.972 |
| 93728_at   | 0.188 | 1.275 | 1.031 | 1.046 | 1.099 |
| 93729_at   | 0.153 | 0.990 | 0.905 | 1.018 | 0.929 |
| 93730_at   | 0.136 | 1.032 | 1.097 | 0.955 | 1.123 |
| 93731_at   | 0.188 | 1.381 | 1.264 | 1.210 | 1.395 |
| 93732_f_at | 0.341 | 1.019 | 1.066 | 1.008 | 1.011 |
| 93733_r_at | 0.484 | 0.848 | 0.852 | 0.885 | 0.793 |
| 93734_i_at | 0.340 | 1.028 | 1.136 | 1.012 | 1.116 |
| 93735_f_at | 0.209 | 1.210 | 1.216 | 1.000 | 1.240 |
| 93736_at   | 0.131 | 0.975 | 1.154 | 1.018 | 1.000 |
| 93737_at   | 0.290 | 0.936 | 0.952 | 0.991 | 0.981 |
| 93738_at   | 0.042 | 0.949 | 1.029 | 1.019 | 0.901 |
| 93740_at   | 0.426 | 1.052 | 1.085 | 1.000 | 1.071 |
| 93741_at   | 0.268 | 0.905 | 0.964 | 0.939 | 0.976 |
| 93742_at   | 0.283 | 0.980 | 0.929 | 1.000 | 0.974 |
| 93743_at   | 0.318 | 1.043 | 1.065 | 1.000 | 1.135 |
| 93744_at   | 0.294 | 0.845 | 0.843 | 1.128 | 0.873 |
| 93747_at   | 0.161 | 1.235 | 1.226 | 1.015 | 1.230 |
| 93748_at   | 0.227 | 1.187 | 1.106 | 1.060 | 1.097 |
| 93749_at   | 0.074 | 1.044 | 1.040 | 0.901 | 1.183 |
| 93750_at   | 0.051 | 1.116 | 1.047 | 1.102 | 1.017 |
| 93751_at   | 0.161 | 1.060 | 0.991 | 1.034 | 0.970 |
| 93752_at   | 0.494 | 1.096 | 1.136 | 1.051 | 1.104 |
| 93753_at   | 0.117 | 1.038 | 1.332 | 1.020 | 1.194 |
| 93754_at   | 0.292 | 0.957 | 0.955 | 1.032 | 1.084 |
| 93755_at   | 0.072 | 1.012 | 3.188 | 1.024 | 1.056 |

|            |       |       |       |       |       |
|------------|-------|-------|-------|-------|-------|
| 93757_at   | 0.156 | 1.092 | 1.066 | 1.038 | 0.997 |
| 93758_at   | 0.290 | 0.951 | 0.970 | 0.963 | 0.999 |
| 93760_at   | 0.418 | 1.089 | 1.053 | 1.021 | 1.110 |
| 93761_at   | 0.271 | 0.971 | 0.983 | 1.031 | 1.006 |
| 93762_at   | 0.143 | 1.043 | 1.050 | 1.042 | 0.984 |
| 93764_at   | 0.243 | 0.950 | 1.004 | 0.913 | 1.016 |
| 93765_at   | 0.249 | 0.939 | 0.861 | 0.919 | 0.899 |
| 93766_at   | 0.238 | 0.932 | 0.876 | 0.962 | 0.937 |
| 93767_i_at | 0.310 | 1.134 | 1.107 | 1.104 | 1.070 |
| 93768_f_at | 0.119 | 1.487 | 1.331 | 1.071 | 1.243 |
| 93769_at   | 0.046 | 0.991 | 1.046 | 0.953 | 1.005 |
| 93770_at   | 0.220 | 0.972 | 0.915 | 1.112 | 0.938 |
| 93771_at   | 0.490 | 0.882 | 0.891 | 0.933 | 0.871 |
| 93772_i_at | 0.276 | 1.196 | 1.221 | 0.960 | 1.279 |
| 93773_f_at | 0.323 | 1.533 | 1.494 | 1.041 | 1.414 |
| 93774_at   | 0.508 | 0.957 | 0.942 | 0.964 | 0.933 |
| 93775_at   | 0.268 | 1.010 | 0.929 | 1.106 | 1.055 |
| 93776_at   | 0.388 | 0.917 | 0.912 | 0.912 | 0.929 |
| 93777_at   | 0.188 | 0.924 | 0.940 | 1.008 | 0.951 |
| 93778_at   | 0.386 | 0.824 | 0.826 | 0.925 | 0.850 |
| 93779_at   | 0.265 | 0.857 | 0.975 | 0.874 | 0.866 |
| 93780_at   | 0.345 | 1.032 | 0.987 | 0.991 | 1.037 |
| 93781_at   | 0.271 | 0.877 | 0.804 | 0.936 | 0.878 |
| 93782_at   | 0.299 | 1.041 | 1.131 | 1.132 | 1.190 |
| 93783_at   | 0.345 | 0.878 | 0.853 | 0.956 | 0.865 |
| 93784_at   | 0.372 | 1.032 | 1.060 | 0.982 | 1.074 |
| 93785_at   | 0.400 | 0.888 | 0.874 | 0.939 | 0.889 |
| 93786_i_at | 0.391 | 1.101 | 1.253 | 1.038 | 1.191 |
| 93787_f_at | 0.458 | 1.121 | 1.223 | 1.051 | 1.196 |
| 93788_at   | 0.496 | 0.876 | 0.849 | 0.897 | 0.818 |
| 93789_s_at | 0.132 | 1.045 | 1.221 | 1.023 | 1.151 |
| 93790_at   | 0.385 | 0.908 | 0.863 | 0.972 | 0.902 |
| 93793_at   | 0.261 | 1.195 | 1.227 | 1.111 | 1.108 |
| 93794_at   | 0.343 | 1.172 | 1.114 | 1.042 | 1.136 |
| 93795_at   | 0.244 | 0.900 | 0.933 | 0.915 | 0.954 |
| 93796_at   | 0.422 | 0.888 | 0.835 | 0.912 | 0.884 |
| 93797_g_at | 0.253 | 0.882 | 0.880 | 1.004 | 0.965 |
| 93798_at   | 0.267 | 0.993 | 0.979 | 1.044 | 0.970 |
| 93799_at   | 0.224 | 0.915 | 0.927 | 1.007 | 0.949 |
| 93800_f_at | 0.392 | 0.888 | 0.852 | 0.928 | 0.883 |
| 93801_at   | 0.384 | 0.845 | 0.828 | 0.870 | 0.778 |
| 93802_at   | 0.246 | 1.144 | 1.117 | 1.071 | 1.053 |
| 93803_at   | 0.117 | 1.157 | 1.214 | 1.261 | 1.006 |
| 93804_at   | 0.278 | 0.848 | 0.904 | 0.907 | 0.806 |
| 93805_at   | 0.189 | 0.992 | 1.051 | 0.943 | 1.118 |
| 93806_at   | 0.322 | 1.241 | 1.228 | 1.031 | 1.193 |
| 93807_at   | 0.468 | 0.984 | 0.934 | 0.981 | 0.962 |

|            |       |       |       |       |       |
|------------|-------|-------|-------|-------|-------|
| 93808_at   | 0.342 | 1.020 | 0.939 | 1.004 | 0.969 |
| 93809_at   | 0.500 | 1.027 | 1.025 | 1.034 | 1.043 |
| 93810_at   | 0.225 | 1.258 | 1.204 | 1.177 | 1.477 |
| 93812_at   | 0.290 | 1.006 | 0.996 | 0.961 | 1.061 |
| 93815_at   | 0.342 | 0.991 | 1.082 | 1.046 | 1.046 |
| 93817_at   | 0.363 | 0.846 | 0.812 | 0.907 | 0.866 |
| 93818_g_at | 0.309 | 0.986 | 1.264 | 0.974 | 1.168 |
| 93819_at   | 0.231 | 1.015 | 1.169 | 0.952 | 1.034 |
| 93820_at   | 0.382 | 0.918 | 0.950 | 0.901 | 1.025 |
| 93821_at   | 0.303 | 1.028 | 0.939 | 0.932 | 1.012 |
| 93822_at   | 0.035 | 0.991 | 1.064 | 0.899 | 1.126 |
| 93823_at   | 0.391 | 1.144 | 1.144 | 1.134 | 1.317 |
| 93824_at   | 0.194 | 0.880 | 0.870 | 0.980 | 0.852 |
| 93826_at   | 0.406 | 1.144 | 1.186 | 1.134 | 1.107 |
| 93827_at   | 0.422 | 0.923 | 0.868 | 0.928 | 0.891 |
| 93829_at   | 0.228 | 1.297 | 1.433 | 1.058 | 1.307 |
| 93830_at   | 0.188 | 1.307 | 1.419 | 1.075 | 1.344 |
| 93831_at   | 0.258 | 0.842 | 0.959 | 0.952 | 1.081 |
| 93832_at   | 0.035 | 1.124 | 1.134 | 0.992 | 1.140 |
| 93833_s_at | 0.480 | 1.082 | 1.019 | 1.030 | 1.061 |
| 93834_at   | 0.396 | 0.867 | 0.811 | 0.911 | 0.852 |
| 93835_at   | 0.066 | 1.115 | 1.240 | 1.010 | 1.280 |
| 93836_at   | 0.059 | 1.056 | 0.923 | 1.173 | 1.094 |
| 93837_at   | 0.187 | 0.867 | 0.825 | 1.003 | 0.837 |
| 93838_at   | 0.158 | 0.980 | 1.045 | 0.961 | 1.033 |
| 93839_at   | 0.361 | 1.155 | 1.114 | 1.085 | 1.101 |
| 93840_at   | 0.438 | 0.852 | 0.826 | 0.922 | 0.807 |
| 93841_at   | 0.109 | 1.042 | 0.968 | 0.983 | 1.073 |
| 93842_at   | 0.340 | 1.129 | 1.318 | 1.103 | 1.140 |
| 93843_at   | 0.327 | 0.970 | 0.992 | 1.001 | 1.012 |
| 93844_at   | 0.351 | 1.007 | 1.094 | 1.040 | 0.974 |
| 93845_at   | 0.463 | 0.968 | 0.993 | 1.002 | 0.985 |
| 93846_at   | 0.483 | 0.882 | 0.838 | 0.897 | 0.863 |
| 93847_at   | 0.378 | 0.807 | 0.824 | 0.856 | 0.829 |
| 93848_at   | 0.268 | 0.814 | 0.892 | 0.920 | 0.881 |
| 93849_at   | 0.371 | 1.003 | 0.958 | 1.018 | 0.984 |
| 93850_at   | 0.301 | 0.854 | 0.922 | 0.966 | 1.069 |
| 93851_at   | 0.279 | 1.046 | 1.059 | 1.032 | 0.993 |
| 93852_at   | 0.497 | 1.204 | 1.326 | 1.170 | 1.336 |
| 93853_at   | 0.246 | 0.871 | 0.869 | 0.933 | 0.995 |
| 93855_at   | 0.262 | 1.072 | 0.984 | 0.942 | 1.048 |
| 93856_at   | 0.324 | 0.950 | 0.909 | 0.918 | 0.968 |
| 93857_at   | 0.211 | 0.918 | 0.970 | 0.991 | 0.962 |
| 93858_at   | 0.369 | 0.915 | 0.993 | 0.930 | 0.893 |
| 93859_at   | 0.276 | 1.293 | 1.217 | 1.148 | 1.139 |
| 93860_i_at | 0.147 | 0.849 | 0.950 | 0.999 | 0.904 |
| 93861_f_at | 0.072 | 0.912 | 1.201 | 1.152 | 1.004 |

|            |       |       |       |       |       |
|------------|-------|-------|-------|-------|-------|
| 93862_i_at | 0.436 | 0.868 | 0.850 | 0.947 | 0.821 |
| 93863_f_at | 0.325 | 0.834 | 0.768 | 0.908 | 0.864 |
| 93864_s_at | 0.325 | 0.937 | 0.935 | 1.067 | 0.984 |
| 93865_s_at | 0.063 | 1.228 | 1.252 | 1.023 | 1.344 |
| 93866_s_at | 0.305 | 1.173 | 1.327 | 1.143 | 1.294 |
| 93867_at   | 0.448 | 1.079 | 1.066 | 1.104 | 1.062 |
| 93868_at   | 0.326 | 0.900 | 1.173 | 1.043 | 1.082 |
| 93869_s_at | 0.083 | 0.937 | 1.306 | 0.837 | 1.422 |
| 93870_at   | 0.449 | 0.899 | 0.894 | 0.908 | 0.920 |
| 93871_at   | 0.156 | 1.064 | 1.226 | 1.032 | 1.313 |
| 93872_at   | 0.280 | 0.883 | 0.827 | 0.981 | 0.895 |
| 93873_s_at | 0.392 | 0.855 | 0.837 | 0.921 | 0.858 |
| 93874_s_at | 0.340 | 1.237 | 1.145 | 1.151 | 1.127 |
| 93875_at   | 0.481 | 0.956 | 0.941 | 1.111 | 0.904 |
| 93877_at   | 0.145 | 1.219 | 1.069 | 1.065 | 1.105 |
| 93878_at   | 0.328 | 0.986 | 0.970 | 1.033 | 1.015 |
| 93879_f_at | 0.504 | 0.900 | 0.879 | 0.904 | 0.877 |
| 93880_at   | 0.361 | 0.921 | 0.930 | 0.959 | 0.962 |
| 93881_i_at | 0.348 | 0.989 | 1.181 | 1.097 | 1.164 |
| 93882_f_at | 0.305 | 0.870 | 1.206 | 1.085 | 1.211 |
| 93883_at   | 0.377 | 0.859 | 0.832 | 0.926 | 0.876 |
| 93884_at   | 0.269 | 1.017 | 1.046 | 1.040 | 1.123 |
| 93885_g_at | 0.270 | 0.976 | 1.018 | 0.915 | 1.161 |
| 93886_at   | 0.199 | 0.754 | 0.803 | 0.888 | 0.792 |
| 93887_at   | 0.320 | 1.066 | 1.014 | 1.069 | 1.044 |
| 93888_at   | 0.241 | 0.847 | 0.815 | 0.953 | 0.848 |
| 93889_f_at | 0.490 | 0.931 | 0.901 | 0.956 | 0.948 |
| 93890_at   | 0.444 | 0.823 | 0.794 | 0.886 | 0.793 |
| 93891_at   | 0.427 | 0.921 | 0.903 | 0.949 | 0.885 |
| 93892_at   | 0.422 | 0.983 | 1.043 | 1.016 | 1.014 |
| 93893_f_at | 0.204 | 0.956 | 0.970 | 0.871 | 1.061 |
| 93894_f_at | 0.056 | 0.961 | 0.913 | 0.893 | 1.031 |
| 93895_s_at | 0.158 | 1.044 | 1.042 | 1.079 | 1.102 |
| 93896_at   | 0.214 | 1.127 | 1.013 | 1.011 | 1.064 |
| 93897_at   | 0.507 | 0.859 | 0.851 | 0.888 | 0.847 |
| 93898_at   | 0.357 | 0.882 | 0.956 | 0.907 | 0.941 |
| 93899_at   | 0.497 | 0.959 | 0.966 | 0.990 | 0.957 |
| 93900_at   | 0.306 | 0.803 | 0.743 | 0.944 | 0.797 |
| 93901_at   | 0.475 | 0.917 | 0.911 | 0.929 | 0.931 |
| 93902_at   | 0.380 | 0.973 | 0.998 | 0.990 | 1.054 |
| 93903_at   | 0.273 | 1.100 | 0.949 | 1.023 | 1.027 |
| 93904_f_at | 0.135 | 0.893 | 1.635 | 0.822 | 0.877 |
| 93905_at   | 0.448 | 0.916 | 0.883 | 0.926 | 0.911 |
| 93906_s_at | 0.339 | 0.914 | 0.859 | 0.885 | 0.912 |
| 93907_f_at | 0.323 | 1.045 | 1.332 | 1.015 | 1.333 |
| 93908_f_at | 0.094 | 0.776 | 1.044 | 0.848 | 1.270 |
| 93909_f_at | 0.101 | 0.708 | 0.989 | 0.819 | 1.126 |



|            |       |       |       |       |       |
|------------|-------|-------|-------|-------|-------|
| 93910_at   | 0.170 | 0.891 | 0.815 | 0.979 | 0.871 |
| 93911_at   | 0.224 | 1.147 | 1.052 | 1.060 | 1.088 |
| 93912_at   | 0.069 | 0.774 | 0.886 | 1.047 | 0.893 |
| 93913_at   | 0.330 | 0.885 | 0.848 | 1.007 | 0.883 |
| 93914_at   | 0.218 | 1.047 | 1.167 | 1.096 | 1.128 |
| 93915_at   | 0.003 | 0.888 | 1.704 | 0.812 | 0.987 |
| 93916_at   | 0.419 | 0.871 | 0.917 | 0.932 | 0.894 |
| 93917_at   | 0.117 | 0.956 | 0.935 | 1.047 | 0.908 |
| 93918_at   | 0.119 | 0.975 | 1.274 | 1.020 | 1.297 |
| 93919_at   | 0.445 | 0.926 | 0.859 | 0.911 | 0.886 |
| 93920_at   | 0.425 | 0.893 | 0.884 | 0.955 | 0.888 |
| 93921_at   | 0.165 | 0.872 | 0.929 | 1.052 | 0.876 |
| 93922_g_at | 0.069 | 0.929 | 0.892 | 1.063 | 0.944 |
| 93923_at   | 0.270 | 1.001 | 0.974 | 1.008 | 0.951 |
| 93924_f_at | 0.307 | 1.070 | 1.100 | 1.008 | 1.062 |
| 93925_at   | 0.441 | 0.758 | 0.797 | 0.815 | 0.780 |
| 93926_at   | 0.411 | 0.880 | 0.878 | 0.904 | 0.919 |
| 93927_f_at | 0.147 | 0.872 | 2.103 | 0.857 | 0.888 |
| 93928_f_at | 0.144 | 0.870 | 0.919 | 0.940 | 0.959 |
| 93929_s_at | 0.258 | 0.959 | 0.895 | 0.949 | 0.930 |
| 93930_at   | 0.132 | 0.775 | 0.887 | 0.993 | 0.911 |
| 93931_at   | 0.389 | 0.857 | 0.847 | 0.937 | 0.857 |
| 93932_at   | 0.342 | 0.867 | 0.864 | 0.955 | 0.869 |
| 93933_at   | 0.468 | 0.908 | 0.903 | 0.993 | 0.889 |
| 93934_at   | 0.427 | 0.799 | 0.783 | 0.884 | 0.810 |
| 93935_at   | 0.438 | 1.125 | 1.090 | 1.036 | 1.118 |
| 93936_at   | 0.424 | 1.098 | 1.193 | 1.056 | 1.248 |
| 93937_at   | 0.439 | 0.935 | 0.890 | 0.926 | 0.929 |
| 93938_at   | 0.276 | 1.061 | 1.091 | 0.986 | 1.090 |
| 93939_at   | 0.161 | 0.876 | 0.919 | 1.038 | 0.946 |
| 93940_at   | 0.290 | 1.090 | 1.272 | 1.080 | 1.177 |
| 93941_at   | 0.427 | 0.934 | 0.889 | 0.923 | 0.898 |
| 93942_at   | 0.334 | 0.846 | 0.816 | 0.929 | 0.844 |
| 93943_f_at | 0.143 | 0.765 | 0.859 | 0.972 | 0.837 |
| 93944_r_at | 0.277 | 0.867 | 0.912 | 1.009 | 0.927 |
| 93945_at   | 0.245 | 0.869 | 0.820 | 0.946 | 0.855 |
| 93946_at   | 0.325 | 0.891 | 0.804 | 0.950 | 0.893 |
| 93947_g_at | 0.391 | 0.852 | 0.811 | 0.928 | 0.804 |
| 93948_at   | 0.195 | 0.820 | 0.789 | 0.876 | 0.814 |
| 93949_at   | 0.227 | 0.968 | 0.959 | 0.990 | 1.047 |
| 93950_at   | 0.266 | 1.094 | 0.993 | 0.918 | 1.013 |
| 93951_at   | 0.327 | 0.916 | 0.943 | 0.930 | 0.965 |
| 93952_r_at | 0.456 | 0.927 | 0.891 | 0.900 | 0.888 |
| 93953_at   | 0.386 | 0.980 | 0.933 | 0.937 | 0.971 |
| 93954_at   | 0.330 | 1.056 | 0.973 | 0.914 | 1.131 |
| 93955_at   | 0.194 | 0.974 | 0.940 | 1.029 | 0.942 |
| 93956_at   | 0.218 | 1.059 | 0.961 | 0.847 | 0.926 |

|            |       |       |       |       |       |
|------------|-------|-------|-------|-------|-------|
| 93957_at   | 0.377 | 0.914 | 0.939 | 0.931 | 0.861 |
| 93958_at   | 0.402 | 0.916 | 0.963 | 0.956 | 0.976 |
| 93959_at   | 0.431 | 0.959 | 0.955 | 1.015 | 0.987 |
| 93961_at   | 0.149 | 0.944 | 0.945 | 0.962 | 1.013 |
| 93962_at   | 0.276 | 1.091 | 1.053 | 0.977 | 1.121 |
| 93963_at   | 0.243 | 0.980 | 0.978 | 0.945 | 1.018 |
| 93964_s_at | 0.387 | 0.965 | 0.874 | 0.867 | 1.073 |
| 93965_r_at | 0.317 | 0.954 | 0.863 | 0.880 | 1.082 |
| 93966_at   | 0.203 | 1.088 | 1.098 | 1.020 | 0.990 |
| 93967_at   | 0.310 | 1.095 | 1.092 | 0.998 | 1.083 |
| 93968_at   | 0.121 | 1.049 | 1.055 | 0.908 | 1.153 |
| 93969_at   | 0.431 | 0.847 | 0.829 | 0.847 | 0.854 |
| 93970_at   | 0.475 | 1.071 | 1.059 | 1.005 | 1.057 |
| 93971_f_at | 0.343 | 1.167 | 1.163 | 1.073 | 1.089 |
| 93972_at   | 0.495 | 1.196 | 1.262 | 1.171 | 1.209 |
| 93973_at   | 0.156 | 1.053 | 1.078 | 0.977 | 1.007 |
| 93974_at   | 0.232 | 0.885 | 1.077 | 0.986 | 1.168 |
| 93975_at   | 0.427 | 1.089 | 1.171 | 1.043 | 1.246 |
| 93976_at   | 0.290 | 1.205 | 1.185 | 1.039 | 1.171 |
| 93978_at   | 0.147 | 1.078 | 0.995 | 1.017 | 0.983 |
| 93980_at   | 0.175 | 1.043 | 1.062 | 0.978 | 1.033 |
| 93981_at   | 0.230 | 0.945 | 1.146 | 1.070 | 1.063 |
| 93982_at   | 0.458 | 0.943 | 0.951 | 0.961 | 0.934 |
| 93983_at   | 0.366 | 0.997 | 1.018 | 1.016 | 0.969 |
| 93984_at   | 0.051 | 1.075 | 1.106 | 0.850 | 1.217 |
| 93985_at   | 0.377 | 1.037 | 1.051 | 1.011 | 1.136 |
| 93986_at   | 0.438 | 1.115 | 1.094 | 1.013 | 1.061 |
| 93987_f_at | 0.143 | 1.122 | 1.328 | 0.928 | 1.269 |
| 93988_at   | 0.069 | 1.000 | 1.041 | 0.847 | 1.163 |
| 93990_at   | 0.136 | 1.255 | 1.221 | 0.976 | 1.130 |
| 93991_at   | 0.396 | 1.138 | 1.245 | 1.203 | 1.155 |
| 93992_at   | 0.434 | 1.028 | 1.087 | 0.999 | 1.043 |
| 93993_at   | 0.093 | 0.867 | 1.115 | 0.923 | 1.037 |
| 93994_at   | 0.350 | 1.050 | 1.101 | 1.552 | 1.117 |
| 93996_at   | 0.261 | 0.819 | 0.674 | 1.466 | 0.754 |
| 93997_at   | 0.478 | 1.035 | 1.047 | 1.014 | 1.114 |
| 93999_at   | 0.039 | 0.927 | 0.972 | 0.836 | 0.997 |
| 94000_at   | 0.432 | 1.091 | 1.186 | 1.066 | 1.121 |
| 94001_at   | 0.120 | 1.037 | 0.975 | 1.040 | 0.971 |
| 94002_at   | 0.330 | 0.971 | 0.940 | 1.019 | 1.009 |
| 94003_at   | 0.132 | 1.349 | 1.404 | 1.053 | 1.293 |
| 94004_at   | 0.293 | 1.216 | 1.317 | 1.136 | 1.168 |
| 94005_at   | 0.488 | 1.050 | 1.091 | 1.050 | 1.174 |
| 94006_at   | 0.354 | 0.960 | 0.925 | 0.961 | 0.875 |
| 94007_at   | 0.421 | 1.051 | 1.106 | 1.010 | 1.151 |
| 94008_at   | 0.279 | 1.141 | 1.246 | 1.060 | 1.394 |
| 94009_at   | 0.277 | 0.887 | 0.891 | 0.923 | 0.955 |

|            |       |       |       |       |       |
|------------|-------|-------|-------|-------|-------|
| 94010_g_at | 0.477 | 0.978 | 0.989 | 0.967 | 0.988 |
| 94011_at   | 0.046 | 1.135 | 1.130 | 1.117 | 0.974 |
| 94012_at   | 0.210 | 0.859 | 0.848 | 0.940 | 0.830 |
| 94014_at   | 0.082 | 1.017 | 1.081 | 0.954 | 1.064 |
| 94015_at   | 0.171 | 1.014 | 0.924 | 0.930 | 0.979 |
| 94016_at   | 0.500 | 0.875 | 0.845 | 0.912 | 0.853 |
| 94017_s_at | 0.051 | 1.253 | 1.266 | 1.038 | 1.080 |
| 94018_at   | 0.318 | 1.309 | 1.265 | 1.139 | 1.225 |
| 94019_at   | 0.327 | 1.226 | 1.179 | 1.014 | 1.110 |
| 94020_at   | 0.130 | 1.037 | 1.185 | 1.023 | 1.072 |
| 94021_at   | 0.345 | 1.019 | 0.956 | 0.995 | 0.991 |
| 94022_at   | 0.189 | 1.214 | 1.214 | 1.027 | 1.237 |
| 94024_at   | 0.350 | 0.899 | 0.950 | 0.944 | 0.921 |
| 94025_at   | 0.287 | 1.004 | 1.072 | 0.931 | 1.054 |
| 94026_at   | 0.507 | 0.900 | 0.873 | 0.922 | 0.851 |
| 94027_at   | 0.264 | 0.782 | 0.784 | 0.769 | 1.141 |
| 94028_f_at | 0.226 | 0.835 | 0.859 | 0.840 | 1.003 |
| 94030_at   | 0.154 | 1.117 | 1.234 | 0.991 | 1.187 |
| 94031_at   | 0.484 | 1.181 | 1.194 | 1.041 | 1.230 |
| 94032_at   | 0.468 | 1.055 | 1.063 | 1.049 | 1.088 |
| 94034_at   | 0.377 | 1.133 | 1.283 | 1.129 | 1.151 |
| 94035_at   | 0.510 | 0.852 | 0.835 | 0.882 | 0.819 |
| 94036_at   | 0.314 | 1.049 | 0.983 | 1.111 | 1.058 |
| 94037_at   | 0.261 | 0.839 | 0.833 | 0.940 | 0.798 |
| 94038_at   | 0.414 | 1.196 | 1.259 | 1.082 | 1.263 |
| 94039_at   | 0.403 | 0.858 | 0.816 | 0.912 | 0.833 |
| 94040_at   | 0.337 | 1.136 | 1.413 | 1.078 | 1.278 |
| 94041_at   | 0.212 | 1.510 | 1.452 | 1.081 | 1.472 |
| 94042_f_at | 0.483 | 0.999 | 1.022 | 1.036 | 1.041 |
| 94043_at   | 0.152 | 1.372 | 1.384 | 1.081 | 1.229 |
| 94044_at   | 0.181 | 1.257 | 1.145 | 1.035 | 1.167 |
| 94045_at   | 0.474 | 0.880 | 0.837 | 0.935 | 0.847 |
| 94046_at   | 0.136 | 1.002 | 1.012 | 0.972 | 0.951 |
| 94047_at   | 0.110 | 1.253 | 1.299 | 1.042 | 1.225 |
| 94048_at   | 0.341 | 1.011 | 1.108 | 1.067 | 1.021 |
| 94049_at   | 0.341 | 0.995 | 0.939 | 1.022 | 0.981 |
| 94051_at   | 0.376 | 0.969 | 0.957 | 1.002 | 0.948 |
| 94052_at   | 0.120 | 0.958 | 0.942 | 0.943 | 0.986 |
| 94053_at   | 0.332 | 0.943 | 0.848 | 0.954 | 0.905 |
| 94054_at   | 0.256 | 1.174 | 1.103 | 1.074 | 1.111 |
| 94055_at   | 0.227 | 0.861 | 0.960 | 0.977 | 1.029 |
| 94056_at   | 0.432 | 1.397 | 1.370 | 1.547 | 1.473 |
| 94057_g_at | 0.360 | 1.270 | 1.333 | 1.765 | 1.458 |
| 94058_r_at | 0.467 | 0.756 | 0.745 | 0.781 | 0.652 |
| 94059_at   | 0.391 | 0.998 | 0.974 | 1.019 | 1.004 |
| 94060_at   | 0.459 | 1.026 | 1.050 | 0.965 | 1.043 |
| 94061_at   | 0.165 | 1.087 | 1.025 | 0.919 | 1.124 |

|            |       |       |       |       |       |
|------------|-------|-------|-------|-------|-------|
| 94062_at   | 0.467 | 1.077 | 1.128 | 1.114 | 1.073 |
| 94063_at   | 0.351 | 1.024 | 1.101 | 1.089 | 1.116 |
| 94064_at   | 0.110 | 1.133 | 1.112 | 0.976 | 1.072 |
| 94065_at   | 0.401 | 0.980 | 0.953 | 0.973 | 0.993 |
| 94066_at   | 0.243 | 1.116 | 1.106 | 1.007 | 1.063 |
| 94067_at   | 0.191 | 0.932 | 1.009 | 0.906 | 0.959 |
| 94068_at   | 0.096 | 1.026 | 1.070 | 0.958 | 1.081 |
| 94069_r_at | 0.269 | 1.031 | 0.967 | 0.998 | 0.983 |
| 94070_at   | 0.445 | 0.939 | 0.928 | 0.955 | 0.956 |
| 94071_at   | 0.120 | 1.199 | 1.238 | 1.011 | 1.171 |
| 94072_g_at | 0.354 | 1.050 | 1.040 | 0.995 | 1.030 |
| 94073_at   | 0.136 | 1.045 | 1.070 | 0.946 | 1.174 |
| 94074_at   | 0.480 | 0.975 | 0.985 | 1.027 | 0.987 |
| 94075_at   | 0.328 | 0.806 | 0.626 | 0.853 | 0.775 |
| 94076_i_at | 0.231 | 1.320 | 1.383 | 1.121 | 1.232 |
| 94077_f_at | 0.091 | 1.295 | 1.382 | 1.056 | 1.260 |
| 94078_at   | 0.331 | 1.038 | 1.123 | 1.015 | 1.115 |
| 94079_at   | 0.439 | 1.152 | 1.148 | 0.995 | 1.195 |
| 94080_at   | 0.495 | 1.174 | 1.217 | 1.192 | 1.173 |
| 94081_at   | 0.286 | 1.239 | 1.278 | 1.064 | 1.261 |
| 94084_at   | 0.250 | 0.968 | 0.977 | 0.946 | 1.024 |
| 94085_at   | 0.056 | 1.078 | 1.310 | 0.869 | 1.149 |
| 94086_at   | 0.488 | 0.836 | 0.832 | 0.895 | 0.820 |
| 94087_at   | 0.343 | 0.937 | 0.885 | 0.974 | 0.978 |
| 94088_at   | 0.480 | 1.083 | 1.100 | 1.047 | 1.064 |
| 94089_at   | 0.468 | 0.903 | 0.852 | 0.921 | 0.894 |
| 94090_at   | 0.470 | 0.860 | 0.828 | 0.912 | 0.858 |
| 94095_at   | 0.332 | 0.944 | 0.871 | 0.939 | 0.960 |
| 94097_at   | 0.297 | 0.923 | 0.883 | 1.000 | 0.897 |
| 94098_at   | 0.344 | 0.819 | 0.817 | 0.921 | 0.847 |
| 94099_at   | 0.287 | 0.890 | 0.831 | 0.955 | 0.912 |
| 94100_s_at | 0.386 | 0.868 | 0.844 | 0.941 | 0.886 |
| 94101_at   | 0.404 | 0.810 | 0.787 | 0.875 | 0.833 |
| 94102_at   | 0.486 | 0.837 | 0.800 | 0.886 | 0.828 |
| 94103_at   | 0.454 | 0.922 | 0.897 | 0.943 | 0.931 |
| 94104_at   | 0.290 | 0.932 | 0.886 | 0.990 | 0.896 |
| 94105_at   | 0.308 | 1.085 | 1.131 | 0.994 | 1.187 |
| 94106_at   | 0.346 | 1.420 | 1.339 | 1.149 | 1.238 |
| 94107_at   | 0.423 | 0.881 | 0.871 | 0.960 | 0.890 |
| 94108_at   | 0.282 | 0.898 | 0.893 | 0.942 | 0.923 |
| 94109_at   | 0.390 | 1.121 | 1.096 | 0.983 | 1.075 |
| 94110_f_at | 0.244 | 0.838 | 0.873 | 0.991 | 0.992 |
| 94111_r_at | 0.445 | 0.855 | 0.843 | 0.940 | 0.864 |
| 94112_at   | 0.247 | 0.864 | 0.922 | 0.948 | 0.988 |
| 94113_at   | 0.448 | 1.158 | 1.148 | 1.107 | 1.092 |
| 94114_at   | 0.272 | 0.860 | 0.858 | 0.959 | 0.905 |
| 94115_at   | 0.431 | 0.852 | 0.854 | 0.901 | 0.853 |

|            |       |       |       |       |       |
|------------|-------|-------|-------|-------|-------|
| 94116_at   | 0.304 | 0.955 | 0.978 | 1.036 | 0.923 |
| 94117_f_at | 0.318 | 0.896 | 0.844 | 0.945 | 0.888 |
| 94118_r_at | 0.454 | 0.853 | 0.814 | 0.911 | 0.853 |
| 94119_at   | 0.413 | 0.818 | 0.799 | 0.907 | 0.811 |
| 94120_s_at | 0.248 | 0.902 | 0.779 | 0.850 | 0.827 |
| 94121_at   | 0.318 | 0.868 | 0.841 | 0.935 | 0.846 |
| 94122_at   | 0.274 | 0.939 | 0.860 | 1.236 | 0.843 |
| 94123_at   | 0.323 | 0.898 | 0.943 | 0.901 | 0.891 |
| 94124_at   | 0.304 | 0.972 | 0.881 | 1.005 | 0.902 |
| 94125_at   | 0.261 | 0.832 | 0.853 | 0.927 | 0.873 |
| 94126_at   | 0.470 | 0.941 | 0.928 | 0.944 | 0.941 |
| 94127_at   | 0.362 | 1.015 | 0.921 | 1.007 | 0.995 |
| 94128_at   | 0.454 | 0.861 | 0.811 | 0.877 | 0.833 |
| 94129_at   | 0.270 | 0.821 | 0.771 | 0.874 | 0.835 |
| 94130_at   | 0.494 | 0.852 | 0.846 | 0.904 | 0.835 |
| 94131_at   | 0.353 | 0.919 | 0.903 | 0.960 | 0.916 |
| 94132_at   | 0.297 | 0.901 | 0.845 | 0.907 | 0.945 |
| 94133_r_at | 0.297 | 0.983 | 0.992 | 1.009 | 1.069 |
| 94134_at   | 0.484 | 0.842 | 0.792 | 0.831 | 0.809 |
| 94135_at   | 0.085 | 1.124 | 0.975 | 1.041 | 0.965 |
| 94136_at   | 0.456 | 0.904 | 0.893 | 0.893 | 0.916 |
| 94137_at   | 0.296 | 0.962 | 1.000 | 1.020 | 1.052 |
| 94138_s_at | 0.364 | 0.868 | 0.797 | 0.914 | 0.879 |
| 94139_at   | 0.384 | 0.915 | 0.924 | 0.970 | 0.953 |
| 94140_at   | 0.468 | 0.926 | 0.917 | 0.966 | 0.940 |
| 94141_at   | 0.245 | 0.865 | 0.965 | 0.878 | 0.844 |
| 94142_at   | 0.299 | 0.882 | 0.807 | 0.911 | 0.840 |
| 94143_at   | 0.303 | 0.870 | 0.833 | 0.911 | 0.899 |
| 94144_g_at | 0.208 | 0.919 | 0.862 | 1.004 | 0.888 |
| 94145_at   | 0.412 | 0.998 | 0.950 | 1.035 | 0.945 |
| 94146_at   | 0.322 | 0.920 | 0.888 | 0.980 | 0.973 |
| 94147_at   | 0.290 | 1.061 | 0.983 | 0.986 | 1.144 |
| 94148_at   | 0.402 | 0.893 | 0.913 | 0.979 | 0.883 |
| 94149_at   | 0.265 | 0.863 | 0.872 | 0.984 | 0.898 |
| 94150_at   | 0.481 | 0.952 | 0.952 | 0.970 | 0.953 |
| 94151_at   | 0.367 | 0.930 | 0.907 | 0.893 | 0.900 |
| 94152_at   | 0.459 | 0.941 | 0.958 | 0.960 | 0.948 |
| 94153_g_at | 0.320 | 0.896 | 0.867 | 0.925 | 0.908 |
| 94154_at   | 0.341 | 0.841 | 0.806 | 0.896 | 0.852 |
| 94155_at   | 0.354 | 0.936 | 0.900 | 0.953 | 0.965 |
| 94156_at   | 0.477 | 0.879 | 0.884 | 0.903 | 0.883 |
| 94157_i_at | 0.180 | 0.946 | 0.918 | 0.921 | 0.878 |
| 94158_f_at | 0.304 | 0.840 | 0.957 | 0.917 | 0.921 |
| 94159_at   | 0.350 | 0.892 | 0.932 | 0.952 | 0.932 |
| 94160_at   | 0.443 | 0.925 | 0.880 | 0.973 | 0.921 |
| 94161_at   | 0.130 | 1.019 | 0.989 | 1.096 | 0.952 |
| 94162_at   | 0.154 | 0.856 | 0.858 | 0.953 | 0.976 |

|            |       |       |       |       |       |
|------------|-------|-------|-------|-------|-------|
| 94163_at   | 0.445 | 0.858 | 0.799 | 0.887 | 0.842 |
| 94164_at   | 0.450 | 0.881 | 0.837 | 0.939 | 0.837 |
| 94165_at   | 0.449 | 0.903 | 0.901 | 0.911 | 0.924 |
| 94166_g_at | 0.445 | 0.901 | 0.897 | 0.937 | 0.924 |
| 94167_at   | 0.022 | 0.948 | 0.894 | 1.070 | 0.873 |
| 94168_at   | 0.425 | 0.854 | 0.816 | 0.924 | 0.857 |
| 94169_at   | 0.328 | 0.754 | 0.739 | 0.882 | 0.778 |
| 94170_at   | 0.463 | 0.820 | 0.783 | 0.853 | 0.819 |
| 94171_at   | 0.364 | 0.884 | 0.868 | 0.965 | 0.910 |
| 94172_at   | 0.474 | 0.952 | 0.945 | 1.003 | 0.931 |
| 94173_at   | 0.380 | 0.866 | 0.865 | 0.940 | 0.904 |
| 94174_at   | 0.465 | 0.942 | 0.909 | 0.956 | 0.939 |
| 94175_at   | 0.375 | 0.911 | 0.880 | 0.987 | 0.899 |
| 94176_at   | 0.363 | 0.862 | 0.857 | 0.941 | 0.872 |
| 94177_at   | 0.423 | 0.939 | 0.943 | 0.920 | 0.931 |
| 94178_at   | 0.496 | 0.951 | 0.958 | 0.955 | 0.959 |
| 94179_at   | 0.345 | 0.946 | 0.936 | 0.966 | 0.979 |
| 94180_s_at | 0.379 | 0.963 | 0.898 | 0.922 | 0.923 |
| 94181_at   | 0.263 | 0.936 | 0.879 | 0.974 | 0.949 |
| 94182_at   | 0.434 | 0.840 | 0.801 | 0.923 | 0.805 |
| 94183_at   | 0.282 | 0.831 | 0.828 | 0.923 | 0.853 |
| 94184_at   | 0.389 | 0.868 | 0.778 | 0.915 | 0.845 |
| 94185_at   | 0.412 | 0.848 | 0.819 | 0.891 | 0.858 |
| 94186_at   | 0.106 | 1.084 | 0.913 | 0.943 | 0.938 |
| 94187_at   | 0.329 | 0.907 | 0.811 | 0.910 | 0.884 |
| 94188_at   | 0.308 | 0.903 | 0.843 | 0.985 | 0.903 |
| 94189_at   | 0.181 | 1.157 | 1.104 | 0.957 | 1.209 |
| 94190_at   | 0.309 | 0.863 | 0.924 | 0.905 | 0.859 |
| 94191_at   | 0.310 | 0.889 | 0.822 | 0.905 | 0.915 |
| 94192_at   | 0.371 | 1.137 | 1.087 | 1.021 | 1.187 |
| 94193_at   | 0.359 | 0.891 | 0.838 | 0.925 | 0.892 |
| 94194_s_at | 0.317 | 0.891 | 0.942 | 0.947 | 0.919 |
| 94195_r_at | 0.344 | 0.822 | 0.821 | 0.926 | 0.878 |
| 94196_at   | 0.423 | 0.952 | 0.940 | 0.970 | 0.987 |
| 94197_at   | 0.337 | 0.866 | 0.956 | 0.928 | 0.975 |
| 94198_at   | 0.441 | 0.923 | 0.881 | 0.966 | 0.896 |
| 94199_at   | 0.412 | 0.908 | 0.876 | 0.931 | 0.904 |
| 94200_at   | 0.239 | 0.882 | 0.915 | 1.003 | 0.908 |
| 94201_at   | 0.420 | 0.914 | 0.882 | 0.892 | 0.903 |
| 94202_at   | 0.303 | 0.880 | 0.911 | 0.938 | 0.925 |
| 94203_at   | 0.427 | 0.850 | 0.835 | 0.917 | 0.831 |
| 94205_at   | 0.428 | 0.984 | 0.936 | 1.023 | 0.953 |
| 94206_at   | 0.271 | 1.078 | 0.989 | 0.992 | 1.085 |
| 94207_at   | 0.244 | 1.051 | 1.082 | 0.909 | 0.932 |
| 94208_at   | 0.316 | 0.693 | 0.999 | 0.787 | 0.864 |
| 94209_g_at | 0.316 | 0.809 | 1.093 | 0.828 | 0.944 |
| 94210_at   | 0.223 | 1.093 | 1.055 | 0.984 | 1.101 |

|            |       |       |       |       |       |
|------------|-------|-------|-------|-------|-------|
| 94211_at   | 0.291 | 0.932 | 0.898 | 0.987 | 0.979 |
| 94212_at   | 0.352 | 0.896 | 0.856 | 0.960 | 0.876 |
| 94214_at   | 0.268 | 0.833 | 0.602 | 0.941 | 0.740 |
| 94215_at   | 0.366 | 0.897 | 0.858 | 0.863 | 0.818 |
| 94216_at   | 0.337 | 1.151 | 1.233 | 1.162 | 1.108 |
| 94217_f_at | 0.376 | 0.882 | 0.883 | 0.880 | 0.911 |
| 94218_at   | 0.308 | 0.960 | 0.974 | 0.929 | 0.981 |
| 94219_at   | 0.165 | 0.887 | 0.992 | 0.906 | 1.036 |
| 94220_at   | 0.497 | 0.737 | 0.710 | 0.765 | 0.664 |
| 94222_at   | 0.236 | 0.967 | 0.914 | 0.982 | 0.888 |
| 94223_at   | 0.444 | 1.188 | 1.198 | 1.058 | 1.219 |
| 94224_s_at | 0.432 | 1.230 | 1.237 | 1.091 | 1.239 |
| 94225_at   | 0.433 | 1.035 | 1.049 | 1.068 | 1.054 |
| 94226_at   | 0.283 | 0.966 | 0.889 | 0.946 | 0.898 |
| 94227_at   | 0.394 | 0.849 | 0.840 | 0.929 | 0.815 |
| 94228_at   | 0.357 | 1.128 | 1.073 | 0.979 | 1.068 |
| 94229_at   | 0.104 | 0.995 | 0.971 | 1.041 | 0.925 |
| 94231_at   | 0.335 | 0.844 | 0.827 | 0.910 | 0.823 |
| 94232_at   | 0.212 | 1.084 | 0.995 | 1.076 | 0.957 |
| 94233_at   | 0.201 | 1.025 | 1.007 | 0.942 | 0.952 |
| 94235_at   | 0.441 | 1.017 | 1.060 | 1.037 | 1.052 |
| 94236_at   | 0.281 | 1.236 | 1.131 | 1.053 | 1.165 |
| 94237_at   | 0.082 | 1.155 | 1.297 | 0.972 | 1.097 |
| 94238_at   | 0.421 | 1.265 | 1.190 | 1.045 | 1.178 |
| 94239_at   | 0.438 | 1.073 | 1.040 | 1.016 | 1.096 |
| 94240_i_at | 0.053 | 1.014 | 1.039 | 0.933 | 1.001 |
| 94241_at   | 0.208 | 1.121 | 1.034 | 1.130 | 1.018 |
| 94242_at   | 0.463 | 1.137 | 1.208 | 1.070 | 1.171 |
| 94243_at   | 0.318 | 0.988 | 1.035 | 0.981 | 1.094 |
| 94244_at   | 0.381 | 0.993 | 0.927 | 0.957 | 0.933 |
| 94245_at   | 0.233 | 1.051 | 1.094 | 0.935 | 1.111 |
| 94246_at   | 0.198 | 1.242 | 1.157 | 1.066 | 1.156 |
| 94247_at   | 0.324 | 1.371 | 1.242 | 1.132 | 1.216 |
| 94248_at   | 0.100 | 0.970 | 0.926 | 1.010 | 0.916 |
| 94249_at   | 0.397 | 1.022 | 1.006 | 0.979 | 1.064 |
| 94250_at   | 0.468 | 1.221 | 1.221 | 1.120 | 1.194 |
| 94252_at   | 0.232 | 1.104 | 1.166 | 1.021 | 1.146 |
| 94253_at   | 0.287 | 0.936 | 1.193 | 0.968 | 1.092 |
| 94254_at   | 0.443 | 1.033 | 1.062 | 0.951 | 1.075 |
| 94255_g_at | 0.433 | 1.161 | 1.184 | 1.013 | 1.151 |
| 94256_at   | 0.106 | 1.176 | 1.140 | 1.115 | 1.009 |
| 94257_at   | 0.165 | 0.892 | 1.063 | 1.047 | 0.907 |
| 94258_at   | 0.063 | 0.971 | 1.207 | 0.855 | 1.096 |
| 94259_at   | 0.219 | 1.217 | 1.051 | 0.955 | 1.005 |
| 94260_at   | 0.190 | 1.139 | 1.035 | 1.075 | 1.022 |
| 94261_at   | 0.377 | 1.139 | 1.138 | 1.042 | 1.141 |
| 94262_at   | 0.379 | 0.886 | 0.910 | 0.962 | 0.937 |

|            |       |       |       |       |       |
|------------|-------|-------|-------|-------|-------|
| 94263_f_at | 0.237 | 1.005 | 1.136 | 0.973 | 1.079 |
| 94264_at   | 0.161 | 1.118 | 1.013 | 1.016 | 1.118 |
| 94266_at   | 0.407 | 1.021 | 0.997 | 1.012 | 1.037 |
| 94267_i_at | 0.180 | 1.202 | 1.305 | 0.987 | 1.330 |
| 94268_f_at | 0.149 | 1.142 | 1.245 | 1.017 | 1.237 |
| 94269_at   | 0.492 | 1.026 | 1.011 | 0.989 | 1.029 |
| 94270_at   | 0.096 | 1.149 | 1.177 | 1.056 | 1.006 |
| 94271_at   | 0.428 | 0.995 | 0.974 | 1.044 | 1.018 |
| 94272_g_at | 0.425 | 0.824 | 0.843 | 0.908 | 0.860 |
| 94273_at   | 0.125 | 1.189 | 1.359 | 1.072 | 1.234 |
| 94274_at   | 0.173 | 0.851 | 0.865 | 0.910 | 0.957 |
| 94275_at   | 0.326 | 1.111 | 1.115 | 1.063 | 1.184 |
| 94276_at   | 0.365 | 1.053 | 1.255 | 1.231 | 1.147 |
| 94277_at   | 0.369 | 0.930 | 0.883 | 0.942 | 0.928 |
| 94278_at   | 0.035 | 1.130 | 1.434 | 0.970 | 1.355 |
| 94279_at   | 0.337 | 0.847 | 0.854 | 0.970 | 0.881 |
| 94281_at   | 0.226 | 1.120 | 1.109 | 1.004 | 1.126 |
| 94282_at   | 0.108 | 1.124 | 1.226 | 1.092 | 1.394 |
| 94283_at   | 0.377 | 0.788 | 0.728 | 0.857 | 0.749 |
| 94284_at   | 0.405 | 1.204 | 1.176 | 1.119 | 1.222 |
| 94285_at   | 0.051 | 1.174 | 1.619 | 0.952 | 1.287 |
| 94286_at   | 0.428 | 1.286 | 1.335 | 1.162 | 1.374 |
| 94288_at   | 0.401 | 0.989 | 0.991 | 1.000 | 1.026 |
| 94289_r_at | 0.051 | 0.984 | 0.953 | 0.916 | 1.065 |
| 94290_at   | 0.089 | 1.059 | 1.013 | 1.120 | 1.001 |
| 94291_at   | 0.234 | 0.889 | 0.825 | 0.897 | 0.779 |
| 94292_at   | 0.449 | 1.097 | 1.089 | 1.014 | 1.132 |
| 94294_at   | 0.091 | 1.061 | 1.206 | 1.018 | 1.287 |
| 94295_at   | 0.084 | 1.157 | 1.036 | 0.994 | 1.107 |
| 94296_s_at | 0.298 | 0.946 | 0.957 | 1.040 | 0.992 |
| 94297_at   | 0.251 | 0.963 | 0.983 | 1.121 | 1.160 |
| 94298_at   | 0.183 | 0.935 | 1.037 | 0.916 | 0.970 |
| 94299_at   | 0.410 | 1.137 | 1.168 | 1.059 | 1.127 |
| 94300_f_at | 0.140 | 1.255 | 1.156 | 1.005 | 1.233 |
| 94301_at   | 0.219 | 0.938 | 1.068 | 0.965 | 1.122 |
| 94302_at   | 0.191 | 1.074 | 1.094 | 0.961 | 1.136 |
| 94303_at   | 0.136 | 1.220 | 1.322 | 0.991 | 1.267 |
| 94304_at   | 0.236 | 1.172 | 1.222 | 1.155 | 1.095 |
| 94305_at   | 0.190 | 1.090 | 1.197 | 1.316 | 1.001 |
| 94307_at   | 0.211 | 1.169 | 1.189 | 1.380 | 1.117 |
| 94308_at   | 0.264 | 0.892 | 0.934 | 1.002 | 0.892 |
| 94309_g_at | 0.194 | 1.021 | 1.155 | 1.303 | 1.030 |
| 94312_at   | 0.481 | 0.945 | 0.934 | 0.970 | 0.961 |
| 94313_at   | 0.301 | 0.924 | 0.916 | 0.911 | 0.933 |
| 94316_at   | 0.428 | 0.856 | 0.829 | 0.915 | 0.858 |
| 94317_at   | 0.496 | 0.806 | 0.801 | 0.866 | 0.797 |
| 94318_at   | 0.109 | 0.864 | 0.830 | 0.942 | 0.841 |



|            |       |       |       |       |       |
|------------|-------|-------|-------|-------|-------|
| 94319_at   | 0.350 | 1.215 | 1.161 | 1.004 | 1.163 |
| 94321_at   | 0.236 | 1.066 | 1.023 | 1.009 | 1.146 |
| 94322_at   | 0.277 | 0.979 | 1.096 | 0.981 | 1.001 |
| 94323_at   | 0.187 | 1.116 | 1.187 | 1.045 | 1.217 |
| 94324_f_at | 0.241 | 0.977 | 0.974 | 0.976 | 1.049 |
| 94325_at   | 0.441 | 1.243 | 1.285 | 1.152 | 1.257 |
| 94326_r_at | 0.483 | 0.816 | 0.791 | 0.880 | 0.814 |
| 94327_at   | 0.478 | 1.070 | 1.088 | 1.101 | 1.099 |
| 94330_at   | 0.227 | 0.939 | 1.053 | 0.943 | 0.971 |
| 94331_at   | 0.179 | 1.197 | 1.107 | 1.077 | 1.069 |
| 94332_at   | 0.375 | 1.140 | 1.151 | 0.918 | 1.321 |
| 94334_f_at | 0.115 | 0.940 | 0.904 | 1.002 | 0.965 |
| 94335_r_at | 0.379 | 0.840 | 0.751 | 0.884 | 0.808 |
| 94336_at   | 0.354 | 0.980 | 0.967 | 1.019 | 0.926 |
| 94337_at   | 0.490 | 0.922 | 0.928 | 0.903 | 0.917 |
| 94338_g_at | 0.340 | 0.977 | 0.941 | 0.964 | 0.998 |
| 94339_at   | 0.335 | 0.944 | 0.933 | 1.004 | 0.915 |
| 94340_at   | 0.216 | 1.263 | 1.230 | 1.058 | 1.250 |
| 94341_at   | 0.424 | 0.990 | 0.953 | 0.983 | 0.967 |
| 94343_at   | 0.374 | 1.181 | 1.287 | 1.024 | 1.160 |
| 94344_at   | 0.291 | 0.861 | 0.868 | 0.950 | 0.845 |
| 94345_at   | 0.070 | 1.364 | 1.437 | 1.040 | 1.293 |
| 94346_at   | 0.449 | 1.171 | 1.154 | 1.050 | 1.207 |
| 94347_i_at | 0.323 | 0.956 | 0.875 | 0.888 | 0.924 |
| 94348_f_at | 0.281 | 1.071 | 1.002 | 1.011 | 1.069 |
| 94349_at   | 0.242 | 0.936 | 0.838 | 1.006 | 0.916 |
| 94350_f_at | 0.180 | 0.944 | 0.844 | 0.989 | 0.956 |
| 94351_r_at | 0.137 | 0.905 | 0.899 | 0.998 | 0.941 |
| 94352_at   | 0.132 | 1.059 | 1.020 | 0.910 | 1.179 |
| 94353_at   | 0.252 | 0.967 | 0.937 | 0.984 | 0.904 |
| 94354_at   | 0.375 | 1.558 | 1.457 | 1.204 | 1.497 |
| 94355_at   | 0.230 | 0.946 | 0.923 | 1.010 | 0.972 |
| 94356_at   | 0.276 | 1.083 | 0.987 | 1.026 | 1.050 |
| 94357_at   | 0.035 | 1.046 | 1.499 | 1.102 | 1.114 |
| 94358_at   | 0.411 | 0.859 | 0.838 | 0.898 | 0.892 |
| 94359_at   | 0.155 | 1.276 | 1.177 | 1.024 | 1.248 |
| 94360_at   | 0.270 | 1.067 | 1.163 | 1.061 | 1.216 |
| 94361_at   | 0.319 | 0.920 | 0.920 | 0.909 | 0.938 |
| 94362_at   | 0.285 | 1.414 | 1.447 | 1.107 | 1.371 |
| 94363_at   | 0.130 | 1.168 | 1.202 | 1.032 | 1.216 |
| 94364_at   | 0.318 | 1.207 | 1.070 | 1.147 | 1.099 |
| 94365_at   | 0.246 | 1.094 | 1.055 | 1.021 | 1.054 |
| 94366_at   | 0.184 | 1.204 | 1.278 | 1.052 | 1.275 |
| 94367_at   | 0.180 | 1.025 | 1.172 | 1.048 | 1.117 |
| 94368_at   | 0.357 | 1.017 | 1.003 | 1.072 | 1.030 |
| 94369_at   | 0.204 | 1.033 | 1.107 | 0.970 | 1.032 |
| 94370_at   | 0.097 | 0.904 | 0.925 | 1.081 | 0.794 |

|            |       |       |       |       |       |
|------------|-------|-------|-------|-------|-------|
| 94371_at   | 0.315 | 0.855 | 0.811 | 0.918 | 0.846 |
| 94372_at   | 0.069 | 0.946 | 0.927 | 0.924 | 0.998 |
| 94373_at   | 0.294 | 0.952 | 0.905 | 0.980 | 0.960 |
| 94374_at   | 0.291 | 1.269 | 1.187 | 1.110 | 1.292 |
| 94375_at   | 0.309 | 1.228 | 1.102 | 1.474 | 1.134 |
| 94376_s_at | 0.366 | 0.875 | 0.912 | 0.961 | 0.937 |
| 94377_at   | 0.220 | 0.934 | 0.852 | 0.891 | 0.966 |
| 94378_at   | 0.436 | 0.885 | 0.865 | 0.929 | 0.905 |
| 94379_at   | 0.169 | 0.952 | 0.985 | 1.054 | 1.065 |
| 94380_at   | 0.293 | 1.035 | 0.946 | 0.982 | 0.912 |
| 94381_at   | 0.372 | 0.978 | 0.927 | 1.100 | 0.964 |
| 94382_at   | 0.348 | 1.086 | 1.103 | 1.200 | 1.125 |
| 94383_at   | 0.074 | 0.998 | 1.241 | 0.990 | 1.051 |
| 94384_at   | 0.293 | 0.889 | 0.870 | 0.875 | 0.777 |
| 94385_at   | 0.364 | 0.808 | 0.815 | 0.895 | 0.850 |
| 94386_at   | 0.149 | 1.345 | 1.156 | 1.024 | 1.149 |
| 94387_at   | 0.426 | 0.949 | 0.980 | 0.919 | 0.950 |
| 94388_at   | 0.292 | 1.066 | 1.070 | 1.048 | 1.003 |
| 94389_at   | 0.363 | 1.004 | 1.050 | 1.009 | 1.017 |
| 94390_at   | 0.323 | 1.339 | 1.226 | 1.086 | 1.208 |
| 94391_at   | 0.161 | 0.928 | 0.856 | 0.955 | 0.976 |
| 94392_f_at | 0.181 | 0.849 | 0.829 | 0.897 | 0.982 |
| 94393_r_at | 0.268 | 0.874 | 0.830 | 0.902 | 0.906 |
| 94394_at   | 0.304 | 0.969 | 1.023 | 0.954 | 1.046 |
| 94395_at   | 0.226 | 1.398 | 1.165 | 0.966 | 1.177 |
| 94396_at   | 0.056 | 1.111 | 1.017 | 0.977 | 1.011 |
| 94397_at   | 0.279 | 1.039 | 0.941 | 0.993 | 1.005 |
| 94398_s_at | 0.410 | 1.069 | 1.030 | 1.048 | 1.043 |
| 94399_at   | 0.478 | 1.099 | 1.107 | 1.019 | 1.115 |
| 94400_at   | 0.472 | 1.027 | 1.004 | 1.027 | 1.033 |
| 94401_s_at | 0.196 | 0.956 | 0.941 | 0.926 | 0.935 |
| 94402_r_at | 0.323 | 0.869 | 0.869 | 0.964 | 0.894 |
| 94403_at   | 0.459 | 0.975 | 1.014 | 0.940 | 0.999 |
| 94404_at   | 0.350 | 0.892 | 0.885 | 0.940 | 0.908 |
| 94405_at   | 0.150 | 0.910 | 0.825 | 1.018 | 0.950 |
| 94406_at   | 0.209 | 1.102 | 1.062 | 1.086 | 1.015 |
| 94407_at   | 0.144 | 1.005 | 0.975 | 1.077 | 0.922 |
| 94408_at   | 0.341 | 1.132 | 1.092 | 1.100 | 1.044 |
| 94409_at   | 0.302 | 0.904 | 0.837 | 0.897 | 0.930 |
| 94410_f_at | 0.303 | 1.244 | 1.225 | 1.040 | 1.244 |
| 94411_at   | 0.319 | 0.920 | 0.942 | 0.965 | 0.956 |
| 94412_at   | 0.483 | 1.012 | 0.987 | 1.016 | 1.024 |
| 94413_at   | 0.145 | 1.530 | 1.439 | 1.136 | 1.452 |
| 94414_at   | 0.069 | 0.915 | 0.849 | 0.982 | 0.891 |
| 94415_at   | 0.139 | 1.409 | 1.301 | 0.980 | 1.351 |
| 94416_at   | 0.202 | 0.946 | 0.862 | 0.956 | 0.940 |
| 94417_at   | 0.369 | 1.103 | 1.047 | 1.069 | 1.057 |

|            |       |       |       |       |       |
|------------|-------|-------|-------|-------|-------|
| 94418_at   | 0.358 | 0.961 | 0.913 | 1.291 | 0.933 |
| 94419_at   | 0.418 | 0.889 | 0.890 | 0.960 | 0.877 |
| 94420_f_at | 0.216 | 1.158 | 1.029 | 0.971 | 1.036 |
| 94421_r_at | 0.383 | 0.975 | 0.919 | 0.945 | 0.929 |
| 94422_at   | 0.263 | 1.198 | 1.203 | 1.040 | 1.171 |
| 94423_at   | 0.356 | 0.919 | 0.859 | 0.937 | 0.918 |
| 94424_at   | 0.472 | 1.105 | 1.078 | 1.075 | 1.085 |
| 94425_at   | 0.022 | 1.040 | 1.684 | 0.947 | 1.331 |
| 94426_at   | 0.379 | 0.895 | 0.863 | 0.951 | 0.894 |
| 94427_at   | 0.440 | 1.103 | 1.166 | 1.059 | 1.142 |
| 94428_at   | 0.427 | 1.158 | 1.206 | 1.049 | 1.178 |
| 94429_at   | 0.333 | 0.940 | 0.827 | 1.104 | 0.852 |
| 94430_at   | 0.314 | 0.964 | 0.899 | 0.929 | 0.928 |
| 94431_at   | 0.110 | 0.822 | 0.945 | 0.960 | 0.929 |
| 94432_at   | 0.197 | 1.282 | 1.476 | 1.080 | 1.394 |
| 94433_at   | 0.505 | 1.283 | 1.340 | 1.139 | 1.453 |
| 94434_at   | 0.429 | 0.918 | 0.839 | 0.904 | 0.876 |
| 94435_at   | 0.416 | 1.113 | 1.104 | 1.001 | 1.196 |
| 94438_at   | 0.397 | 1.052 | 0.991 | 1.064 | 0.991 |
| 94439_at   | 0.496 | 1.236 | 1.318 | 1.205 | 1.325 |
| 94440_at   | 0.307 | 0.892 | 0.850 | 0.912 | 0.798 |
| 94441_at   | 0.359 | 1.103 | 1.116 | 1.105 | 1.045 |
| 94442_s_at | 0.449 | 0.847 | 0.886 | 0.903 | 0.876 |
| 94445_at   | 0.375 | 1.171 | 1.241 | 1.023 | 1.189 |
| 94447_at   | 0.454 | 0.958 | 0.969 | 0.994 | 0.977 |
| 94448_at   | 0.217 | 1.024 | 1.138 | 0.980 | 1.119 |
| 94449_at   | 0.320 | 1.191 | 1.071 | 1.068 | 1.156 |
| 94450_at   | 0.379 | 1.222 | 1.239 | 1.068 | 1.161 |
| 94451_at   | 0.321 | 0.936 | 1.018 | 0.970 | 0.993 |
| 94452_g_at | 0.443 | 1.127 | 1.246 | 1.054 | 1.179 |
| 94453_at   | 0.392 | 1.006 | 1.061 | 0.985 | 1.035 |
| 94454_at   | 0.389 | 1.264 | 1.296 | 1.166 | 1.227 |
| 94455_at   | 0.274 | 1.115 | 1.216 | 1.015 | 1.119 |
| 94456_at   | 0.370 | 1.332 | 1.414 | 1.118 | 1.340 |
| 94457_at   | 0.374 | 1.122 | 1.104 | 1.086 | 1.065 |
| 94458_at   | 0.422 | 1.084 | 1.093 | 1.059 | 1.130 |
| 94459_at   | 0.334 | 1.118 | 1.081 | 0.998 | 1.185 |
| 94460_at   | 0.244 | 1.281 | 1.322 | 1.073 | 1.226 |
| 94461_at   | 0.413 | 1.104 | 1.227 | 1.101 | 1.169 |
| 94462_at   | 0.158 | 0.932 | 1.060 | 1.012 | 1.094 |
| 94463_at   | 0.202 | 0.933 | 0.981 | 0.991 | 1.003 |
| 94464_at   | 0.284 | 1.336 | 1.403 | 1.078 | 1.487 |
| 94465_g_at | 0.322 | 1.035 | 1.101 | 1.005 | 1.170 |
| 94466_f_at | 0.231 | 1.178 | 1.200 | 1.021 | 1.270 |
| 94467_at   | 0.082 | 1.082 | 0.898 | 0.989 | 0.964 |
| 94468_at   | 0.308 | 0.900 | 0.907 | 0.911 | 0.943 |
| 94469_at   | 0.380 | 1.167 | 1.242 | 1.008 | 1.234 |

|            |       |       |       |       |       |
|------------|-------|-------|-------|-------|-------|
| 94470_i_at | 0.314 | 1.085 | 1.086 | 0.975 | 1.093 |
| 94471_r_at | 0.254 | 1.160 | 1.149 | 1.046 | 1.132 |
| 94472_at   | 0.500 | 0.979 | 0.938 | 0.984 | 0.950 |
| 94473_at   | 0.392 | 1.141 | 1.102 | 1.068 | 1.108 |
| 94476_at   | 0.298 | 0.947 | 0.950 | 1.026 | 0.929 |
| 94477_at   | 0.474 | 0.851 | 0.844 | 0.913 | 0.862 |
| 94478_at   | 0.244 | 1.201 | 1.131 | 0.986 | 1.250 |
| 94479_at   | 0.246 | 0.862 | 0.842 | 0.939 | 0.831 |
| 94480_at   | 0.458 | 0.932 | 0.915 | 0.969 | 0.953 |
| 94481_at   | 0.313 | 1.079 | 0.985 | 1.073 | 1.036 |
| 94482_at   | 0.392 | 0.956 | 0.966 | 0.992 | 0.979 |
| 94483_at   | 0.265 | 1.101 | 1.022 | 1.006 | 1.098 |
| 94484_at   | 0.326 | 1.171 | 1.154 | 1.002 | 1.123 |
| 94485_at   | 0.352 | 1.100 | 1.133 | 1.152 | 1.139 |
| 94486_at   | 0.086 | 1.020 | 1.329 | 1.080 | 1.011 |
| 94488_at   | 0.169 | 1.008 | 1.108 | 0.964 | 1.083 |
| 94489_at   | 0.497 | 1.248 | 1.269 | 1.129 | 1.282 |
| 94490_at   | 0.357 | 1.059 | 1.025 | 0.955 | 1.081 |
| 94491_at   | 0.441 | 0.982 | 0.982 | 1.046 | 1.008 |
| 94492_at   | 0.145 | 1.200 | 1.131 | 1.039 | 1.077 |
| 94493_at   | 0.340 | 1.072 | 1.059 | 1.069 | 1.018 |
| 94494_at   | 0.456 | 1.072 | 1.049 | 1.025 | 1.039 |
| 94495_at   | 0.450 | 0.855 | 0.812 | 0.882 | 0.784 |
| 94499_at   | 0.371 | 1.225 | 1.164 | 1.012 | 1.143 |
| 94501_at   | 0.461 | 1.208 | 1.199 | 1.124 | 1.198 |
| 94502_at   | 0.309 | 1.011 | 1.115 | 0.909 | 1.035 |
| 94503_at   | 0.144 | 1.075 | 1.174 | 0.979 | 1.054 |
| 94504_at   | 0.403 | 0.948 | 0.922 | 0.973 | 0.948 |
| 94505_at   | 0.329 | 1.215 | 1.056 | 1.116 | 1.147 |
| 94506_at   | 0.118 | 1.155 | 1.260 | 1.046 | 1.265 |
| 94507_at   | 0.191 | 1.189 | 1.073 | 1.501 | 0.912 |
| 94508_at   | 0.218 | 0.951 | 1.086 | 0.956 | 1.078 |
| 94509_at   | 0.386 | 1.166 | 1.216 | 1.075 | 1.252 |
| 94510_at   | 0.441 | 1.034 | 1.062 | 1.062 | 1.035 |
| 94511_at   | 0.352 | 0.960 | 1.062 | 0.975 | 1.071 |
| 94512_f_at | 0.072 | 0.940 | 1.015 | 0.948 | 1.000 |
| 94513_r_at | 0.481 | 0.771 | 0.785 | 0.832 | 0.747 |
| 94514_s_at | 0.474 | 0.965 | 0.924 | 0.971 | 0.956 |
| 94515_at   | 0.496 | 1.184 | 1.194 | 1.117 | 1.187 |
| 94516_f_at | 0.329 | 0.942 | 0.942 | 1.187 | 0.876 |
| 94517_r_at | 0.504 | 0.820 | 0.770 | 0.845 | 0.732 |
| 94518_at   | 0.302 | 0.987 | 1.071 | 0.954 | 1.059 |
| 94520_at   | 0.394 | 0.839 | 0.797 | 0.918 | 0.846 |
| 94521_at   | 0.153 | 0.927 | 0.891 | 0.900 | 0.933 |
| 94522_at   | 0.322 | 1.024 | 1.069 | 0.959 | 1.113 |
| 94524_at   | 0.499 | 1.052 | 1.048 | 1.019 | 1.055 |
| 94526_at   | 0.256 | 1.142 | 1.234 | 1.151 | 1.074 |

|            |       |       |       |       |       |
|------------|-------|-------|-------|-------|-------|
| 94527_at   | 0.504 | 0.960 | 0.946 | 0.958 | 0.943 |
| 94528_at   | 0.175 | 0.825 | 0.933 | 0.859 | 0.938 |
| 94530_at   | 0.130 | 1.072 | 1.200 | 1.025 | 1.100 |
| 94531_at   | 0.255 | 0.960 | 0.913 | 1.139 | 0.899 |
| 94532_at   | 0.056 | 1.013 | 1.060 | 0.954 | 1.060 |
| 94534_at   | 0.229 | 0.871 | 0.900 | 1.031 | 0.919 |
| 94535_at   | 0.244 | 1.085 | 1.026 | 1.021 | 1.047 |
| 94536_s_at | 0.225 | 0.980 | 0.910 | 0.919 | 1.012 |
| 94537_at   | 0.354 | 1.124 | 1.071 | 1.034 | 1.089 |
| 94539_f_at | 0.232 | 0.910 | 0.818 | 0.939 | 0.871 |
| 94540_at   | 0.298 | 0.914 | 0.869 | 0.990 | 0.860 |
| 94541_at   | 0.488 | 0.880 | 0.849 | 0.910 | 0.880 |
| 94542_at   | 0.278 | 0.883 | 0.940 | 1.019 | 0.898 |
| 94543_at   | 0.477 | 0.906 | 0.882 | 0.951 | 0.894 |
| 94545_at   | 0.297 | 1.297 | 1.258 | 1.210 | 1.201 |
| 94548_at   | 0.163 | 0.958 | 1.043 | 1.028 | 1.063 |
| 94549_at   | 0.103 | 0.975 | 1.153 | 1.007 | 1.165 |
| 94550_at   | 0.278 | 1.083 | 1.177 | 1.055 | 1.232 |
| 94551_at   | 0.434 | 0.901 | 0.903 | 0.921 | 0.922 |
| 94552_at   | 0.283 | 1.094 | 1.162 | 1.059 | 1.074 |
| 94554_at   | 0.331 | 0.964 | 0.898 | 0.959 | 0.971 |
| 94555_at   | 0.197 | 0.978 | 0.906 | 0.988 | 0.964 |
| 94556_at   | 0.308 | 1.103 | 1.127 | 1.132 | 1.311 |
| 94557_at   | 0.233 | 0.907 | 0.818 | 0.947 | 0.888 |
| 94558_g_at | 0.117 | 0.996 | 0.943 | 0.972 | 1.016 |
| 94559_at   | 0.386 | 0.858 | 0.819 | 0.911 | 0.807 |
| 94561_at   | 0.244 | 1.051 | 1.020 | 0.930 | 1.006 |
| 94562_at   | 0.233 | 0.953 | 0.982 | 1.038 | 1.035 |
| 94563_at   | 0.383 | 0.956 | 0.925 | 0.998 | 0.923 |
| 94564_at   | 0.291 | 0.828 | 0.831 | 0.957 | 0.842 |
| 94565_at   | 0.434 | 0.913 | 0.851 | 0.911 | 0.888 |
| 94566_at   | 0.361 | 0.860 | 0.826 | 0.937 | 0.872 |
| 94568_at   | 0.331 | 0.871 | 0.890 | 0.949 | 0.891 |
| 94571_at   | 0.321 | 0.923 | 0.874 | 0.972 | 0.965 |
| 94618_at   | 0.507 | 0.895 | 0.868 | 0.924 | 0.839 |
| 94619_at   | 0.323 | 0.819 | 0.746 | 0.876 | 0.793 |
| 94621_at   | 0.390 | 0.853 | 0.836 | 0.919 | 0.874 |
| 94622_at   | 0.440 | 0.814 | 0.825 | 0.850 | 0.840 |
| 94623_at   | 0.434 | 0.853 | 0.828 | 0.870 | 0.867 |
| 94624_at   | 0.507 | 0.840 | 0.809 | 0.872 | 0.799 |
| 94625_at   | 0.377 | 0.865 | 0.845 | 0.936 | 0.889 |
| 94626_at   | 0.274 | 0.792 | 0.753 | 0.878 | 0.781 |
| 94627_at   | 0.295 | 0.873 | 0.903 | 0.965 | 0.887 |
| 94628_r_at | 0.196 | 0.865 | 0.900 | 0.947 | 0.913 |
| 94630_at   | 0.323 | 0.837 | 0.809 | 0.923 | 0.817 |
| 94631_at   | 0.273 | 0.872 | 0.843 | 0.945 | 0.865 |
| 94632_at   | 0.308 | 0.979 | 0.946 | 0.968 | 1.007 |

|            |       |       |       |       |       |
|------------|-------|-------|-------|-------|-------|
| 94633_at   | 0.480 | 0.964 | 0.964 | 1.002 | 0.980 |
| 94634_at   | 0.409 | 0.882 | 0.799 | 0.919 | 0.827 |
| 94635_at   | 0.419 | 0.828 | 0.831 | 0.897 | 0.852 |
| 94636_at   | 0.496 | 0.845 | 0.834 | 0.889 | 0.839 |
| 94637_at   | 0.300 | 0.845 | 0.815 | 0.926 | 0.853 |
| 94638_at   | 0.417 | 0.885 | 0.891 | 0.902 | 0.889 |
| 94639_at   | 0.374 | 0.979 | 1.010 | 1.018 | 0.959 |
| 94640_at   | 0.449 | 1.011 | 1.036 | 1.040 | 1.009 |
| 94641_at   | 0.386 | 0.916 | 0.944 | 0.978 | 0.913 |
| 94642_at   | 0.320 | 0.902 | 0.891 | 0.939 | 0.942 |
| 94643_at   | 0.091 | 0.747 | 0.752 | 0.906 | 0.826 |
| 94644_at   | 0.199 | 0.880 | 0.845 | 0.947 | 0.915 |
| 94645_at   | 0.317 | 0.897 | 0.868 | 0.950 | 0.866 |
| 94657_at   | 0.293 | 0.905 | 0.909 | 0.860 | 0.897 |
| 94662_at   | 0.372 | 0.940 | 0.838 | 0.900 | 0.901 |
| 94663_at   | 0.231 | 0.944 | 0.906 | 0.940 | 0.993 |
| 94664_at   | 0.074 | 0.909 | 0.851 | 0.984 | 0.891 |
| 94665_at   | 0.181 | 0.865 | 0.815 | 0.930 | 0.821 |
| 94667_at   | 0.290 | 0.804 | 0.776 | 0.918 | 0.803 |
| 94668_at   | 0.472 | 0.908 | 0.896 | 0.946 | 0.907 |
| 94674_at   | 0.419 | 0.928 | 0.900 | 0.938 | 0.956 |
| 94683_at   | 0.420 | 0.833 | 0.839 | 0.905 | 0.868 |
| 94684_at   | 0.483 | 0.881 | 0.859 | 0.918 | 0.850 |
| 94685_at   | 0.500 | 0.886 | 0.849 | 0.881 | 0.843 |
| 94686_at   | 0.494 | 0.791 | 0.785 | 0.818 | 0.810 |
| 94687_at   | 0.240 | 0.861 | 0.813 | 0.922 | 0.801 |
| 94688_at   | 0.422 | 0.752 | 0.771 | 0.852 | 0.798 |
| 94689_at   | 0.315 | 1.295 | 1.295 | 0.972 | 1.210 |
| 94690_at   | 0.188 | 0.896 | 0.859 | 0.978 | 0.878 |
| 94691_at   | 0.288 | 0.821 | 0.786 | 0.831 | 0.874 |
| 94692_at   | 0.422 | 0.838 | 0.790 | 0.856 | 0.787 |
| 94693_at   | 0.391 | 0.862 | 0.885 | 0.895 | 0.886 |
| 94694_at   | 0.405 | 0.893 | 0.878 | 0.931 | 0.868 |
| 94695_at   | 0.301 | 0.909 | 0.820 | 0.920 | 0.885 |
| 94696_at   | 0.407 | 0.860 | 0.834 | 0.910 | 0.812 |
| 94697_at   | 0.293 | 0.902 | 0.978 | 0.942 | 0.931 |
| 94698_at   | 0.112 | 0.800 | 0.954 | 0.971 | 1.084 |
| 94699_at   | 0.249 | 0.940 | 0.942 | 1.008 | 0.977 |
| 94700_at   | 0.300 | 0.941 | 0.904 | 0.893 | 0.934 |
| 94701_at   | 0.385 | 0.877 | 0.868 | 0.942 | 0.907 |
| 94702_at   | 0.431 | 0.951 | 0.922 | 0.942 | 0.892 |
| 94703_at   | 0.504 | 0.904 | 0.865 | 0.917 | 0.871 |
| 94704_at   | 0.470 | 1.016 | 1.005 | 0.989 | 0.984 |
| 94705_at   | 0.488 | 0.957 | 0.922 | 0.939 | 0.911 |
| 94706_s_at | 0.348 | 0.777 | 0.734 | 0.877 | 0.808 |
| 94707_s_at | 0.249 | 0.891 | 0.818 | 0.974 | 0.915 |
| 94708_at   | 0.474 | 0.904 | 0.863 | 0.930 | 0.895 |

|            |       |       |       |       |       |
|------------|-------|-------|-------|-------|-------|
| 94709_at   | 0.429 | 0.877 | 0.857 | 0.947 | 0.853 |
| 94710_g_at | 0.216 | 0.883 | 0.824 | 0.916 | 0.849 |
| 94711_at   | 0.253 | 0.910 | 0.843 | 0.962 | 0.952 |
| 94712_at   | 0.126 | 0.980 | 0.915 | 0.985 | 1.147 |
| 94713_at   | 0.284 | 0.972 | 1.000 | 0.943 | 1.030 |
| 94714_at   | 0.486 | 0.965 | 0.954 | 0.976 | 0.975 |
| 94715_at   | 0.477 | 0.379 | 0.385 | 0.397 | 0.370 |
| 94716_f_at | 0.301 | 0.863 | 0.933 | 0.922 | 0.906 |
| 94717_f_at | 0.410 | 0.880 | 0.837 | 0.883 | 0.807 |
| 94718_at   | 0.223 | 0.990 | 0.988 | 1.068 | 1.010 |
| 94719_at   | 0.449 | 0.920 | 0.886 | 0.945 | 0.904 |
| 94720_at   | 0.250 | 0.801 | 0.967 | 0.928 | 0.953 |
| 94721_at   | 0.452 | 0.896 | 0.882 | 0.938 | 0.896 |
| 94722_f_at | 0.193 | 0.941 | 0.833 | 1.014 | 0.911 |
| 94723_at   | 0.247 | 0.990 | 0.921 | 1.027 | 0.958 |
| 94724_at   | 0.287 | 0.973 | 0.926 | 0.965 | 0.969 |
| 94725_f_at | 0.035 | 1.057 | 3.047 | 0.775 | 1.041 |
| 94726_at   | 0.299 | 0.776 | 0.797 | 0.812 | 0.829 |
| 94727_f_at | 0.492 | 1.016 | 0.983 | 1.031 | 1.004 |
| 94728_f_at | 0.240 | 0.844 | 1.022 | 0.894 | 0.853 |
| 94729_r_at | 0.323 | 0.750 | 0.831 | 0.833 | 0.719 |
| 94730_at   | 0.438 | 0.917 | 0.904 | 0.928 | 0.924 |
| 94731_at   | 0.335 | 0.935 | 0.852 | 0.959 | 0.909 |
| 94732_at   | 0.404 | 0.968 | 0.975 | 1.174 | 0.959 |
| 94733_at   | 0.211 | 0.914 | 0.889 | 1.000 | 0.948 |
| 94734_at   | 0.115 | 0.902 | 0.831 | 0.925 | 0.830 |
| 94735_s_at | 0.298 | 0.891 | 0.844 | 0.873 | 0.913 |
| 94736_at   | 0.290 | 0.914 | 0.948 | 1.014 | 0.963 |
| 94737_at   | 0.287 | 1.049 | 0.999 | 0.996 | 1.145 |
| 94738_s_at | 0.440 | 0.940 | 0.971 | 0.931 | 0.920 |
| 94739_at   | 0.231 | 1.022 | 0.974 | 1.073 | 1.026 |
| 94740_g_at | 0.297 | 0.896 | 0.897 | 0.899 | 0.946 |
| 94741_at   | 0.505 | 0.879 | 0.865 | 0.906 | 0.868 |
| 94743_f_at | 0.456 | 0.993 | 1.117 | 1.024 | 1.084 |
| 94744_at   | 0.254 | 0.834 | 0.783 | 0.921 | 0.891 |
| 94745_f_at | 0.405 | 0.983 | 0.943 | 1.061 | 0.993 |
| 94746_at   | 0.236 | 0.972 | 0.978 | 0.968 | 1.052 |
| 94747_at   | 0.445 | 0.914 | 0.906 | 0.981 | 0.925 |
| 94748_g_at | 0.136 | 0.839 | 0.921 | 0.938 | 0.967 |
| 94749_f_at | 0.448 | 0.852 | 0.847 | 0.910 | 0.859 |
| 94750_at   | 0.267 | 0.938 | 0.918 | 0.978 | 0.890 |
| 94752_s_at | 0.411 | 0.920 | 0.901 | 0.964 | 0.941 |
| 94753_at   | 0.206 | 0.952 | 1.043 | 0.967 | 1.035 |
| 94754_at   | 0.269 | 0.995 | 0.915 | 0.999 | 0.931 |
| 94755_at   | 0.298 | 0.996 | 1.032 | 0.958 | 1.030 |
| 94756_at   | 0.279 | 0.961 | 0.854 | 0.928 | 0.864 |
| 94757_at   | 0.429 | 1.123 | 1.113 | 1.069 | 1.213 |

|            |       |       |       |       |       |
|------------|-------|-------|-------|-------|-------|
| 94758_s_at | 0.097 | 0.921 | 0.932 | 0.945 | 1.048 |
| 94759_at   | 0.497 | 0.904 | 0.876 | 0.938 | 0.885 |
| 94760_at   | 0.347 | 0.840 | 0.840 | 0.940 | 0.899 |
| 94761_at   | 0.022 | 1.064 | 1.768 | 1.012 | 1.053 |
| 94762_at   | 0.470 | 0.896 | 0.886 | 0.935 | 0.897 |
| 94763_at   | 0.318 | 0.827 | 0.788 | 0.879 | 0.878 |
| 94764_at   | 0.234 | 0.838 | 0.860 | 0.832 | 0.901 |
| 94765_at   | 0.351 | 0.900 | 0.844 | 0.915 | 0.835 |
| 94766_at   | 0.233 | 0.996 | 0.996 | 0.963 | 1.034 |
| 94767_at   | 0.118 | 0.940 | 0.994 | 0.902 | 1.049 |
| 94768_at   | 0.269 | 1.282 | 1.268 | 1.005 | 1.256 |
| 94769_at   | 0.409 | 0.929 | 0.932 | 0.982 | 0.943 |
| 94770_at   | 0.219 | 1.015 | 0.973 | 0.935 | 0.975 |
| 94771_at   | 0.097 | 0.960 | 1.000 | 1.075 | 1.064 |
| 94772_at   | 0.474 | 0.920 | 0.906 | 0.967 | 0.927 |
| 94773_at   | 0.308 | 0.858 | 0.890 | 0.872 | 0.869 |
| 94774_at   | 0.253 | 1.045 | 1.287 | 1.012 | 1.102 |
| 94775_at   | 0.334 | 0.897 | 0.829 | 0.906 | 0.818 |
| 94776_f_at | 0.458 | 0.864 | 0.830 | 0.891 | 0.865 |
| 94777_at   | 0.197 | 0.810 | 0.687 | 1.331 | 0.769 |
| 94778_at   | 0.051 | 1.231 | 1.705 | 1.078 | 1.224 |
| 94779_f_at | 0.125 | 0.844 | 0.835 | 0.832 | 0.931 |
| 94780_at   | 0.272 | 1.108 | 0.912 | 0.952 | 0.964 |
| 94781_at   | 0.234 | 1.066 | 1.027 | 1.030 | 1.138 |
| 94782_at   | 0.197 | 0.923 | 0.871 | 0.988 | 0.906 |
| 94783_at   | 0.496 | 0.939 | 0.917 | 0.968 | 0.931 |
| 94784_at   | 0.255 | 0.999 | 0.943 | 1.074 | 1.044 |
| 94785_at   | 0.477 | 0.860 | 0.847 | 0.914 | 0.858 |
| 94786_at   | 0.445 | 0.906 | 0.873 | 0.979 | 0.879 |
| 94787_at   | 0.298 | 0.899 | 0.868 | 0.964 | 0.897 |
| 94788_f_at | 0.142 | 0.977 | 1.207 | 1.005 | 1.096 |
| 94789_r_at | 0.091 | 0.913 | 1.097 | 0.954 | 1.104 |
| 94790_at   | 0.109 | 0.999 | 0.909 | 1.027 | 0.981 |
| 94791_s_at | 0.312 | 0.871 | 0.782 | 0.898 | 0.840 |
| 94792_at   | 0.370 | 1.066 | 1.048 | 1.043 | 1.105 |
| 94793_at   | 0.477 | 0.985 | 0.995 | 1.021 | 0.990 |
| 94794_at   | 0.354 | 1.014 | 1.017 | 1.018 | 1.106 |
| 94795_at   | 0.392 | 0.838 | 0.816 | 0.848 | 0.865 |
| 94796_at   | 0.146 | 1.470 | 1.285 | 1.152 | 1.175 |
| 94797_at   | 0.400 | 0.878 | 0.822 | 0.924 | 0.889 |
| 94798_at   | 0.494 | 0.950 | 0.909 | 0.960 | 0.922 |
| 94799_at   | 0.323 | 0.915 | 0.834 | 0.883 | 0.877 |
| 94800_at   | 0.439 | 0.916 | 0.912 | 0.946 | 0.930 |
| 94801_at   | 0.475 | 0.975 | 0.985 | 0.950 | 0.962 |
| 94802_at   | 0.299 | 1.252 | 1.045 | 1.031 | 1.100 |
| 94803_at   | 0.256 | 0.971 | 0.908 | 0.943 | 0.893 |
| 94804_at   | 0.257 | 1.044 | 0.967 | 1.004 | 1.094 |



|            |       |       |       |       |       |
|------------|-------|-------|-------|-------|-------|
| 94805_f_at | 0.033 | 1.104 | 1.741 | 0.943 | 1.577 |
| 94806_at   | 0.444 | 1.235 | 1.285 | 1.216 | 1.188 |
| 94807_at   | 0.244 | 0.916 | 0.953 | 1.237 | 0.917 |
| 94809_at   | 0.230 | 0.967 | 0.881 | 0.940 | 0.977 |
| 94810_at   | 0.081 | 1.298 | 1.391 | 1.062 | 1.282 |
| 94811_s_at | 0.287 | 0.899 | 0.872 | 0.933 | 0.963 |
| 94812_at   | 0.267 | 1.186 | 1.057 | 1.050 | 1.132 |
| 94813_at   | 0.182 | 1.130 | 0.976 | 1.009 | 1.035 |
| 94814_at   | 0.159 | 1.040 | 1.079 | 1.001 | 1.119 |
| 94815_at   | 0.223 | 1.223 | 1.426 | 1.103 | 1.439 |
| 94817_at   | 0.117 | 0.930 | 0.884 | 0.985 | 0.887 |
| 94818_at   | 0.274 | 1.334 | 1.224 | 1.045 | 1.279 |
| 94819_f_at | 0.174 | 1.214 | 1.135 | 1.049 | 1.180 |
| 94820_r_at | 0.319 | 1.183 | 1.116 | 1.169 | 1.142 |
| 94821_at   | 0.329 | 0.974 | 1.191 | 0.966 | 0.986 |
| 94822_at   | 0.504 | 0.927 | 0.890 | 0.954 | 0.891 |
| 94823_at   | 0.254 | 1.030 | 1.051 | 0.967 | 1.060 |
| 94825_at   | 0.467 | 0.856 | 0.808 | 0.870 | 0.837 |
| 94826_at   | 0.084 | 1.138 | 1.221 | 0.993 | 1.202 |
| 94827_at   | 0.178 | 0.877 | 0.999 | 0.963 | 0.938 |
| 94828_at   | 0.212 | 0.950 | 0.940 | 1.015 | 0.939 |
| 94829_at   | 0.380 | 1.037 | 0.999 | 1.049 | 1.007 |
| 94830_at   | 0.287 | 1.435 | 1.311 | 1.177 | 1.263 |
| 94831_at   | 0.093 | 1.204 | 1.658 | 1.207 | 1.389 |
| 94832_at   | 0.211 | 1.252 | 1.184 | 0.985 | 1.317 |
| 94833_at   | 0.369 | 1.203 | 1.163 | 1.229 | 1.132 |
| 94834_at   | 0.349 | 1.228 | 1.232 | 1.104 | 1.264 |
| 94835_f_at | 0.505 | 1.036 | 1.045 | 1.024 | 1.073 |
| 94836_at   | 0.468 | 0.921 | 0.881 | 0.945 | 0.921 |
| 94837_at   | 0.459 | 1.144 | 1.269 | 1.113 | 1.194 |
| 94838_r_at | 0.477 | 0.936 | 0.899 | 0.964 | 0.919 |
| 94839_at   | 0.209 | 1.116 | 1.152 | 1.070 | 1.042 |
| 94840_at   | 0.063 | 1.211 | 1.489 | 1.068 | 1.511 |
| 94841_at   | 0.188 | 1.006 | 1.056 | 0.937 | 1.099 |
| 94842_at   | 0.291 | 1.068 | 1.093 | 0.964 | 1.119 |
| 94843_at   | 0.084 | 0.892 | 0.942 | 0.934 | 1.021 |
| 94844_at   | 0.408 | 0.877 | 0.873 | 0.931 | 0.896 |
| 94845_at   | 0.215 | 1.422 | 1.257 | 1.125 | 1.214 |
| 94848_at   | 0.425 | 0.752 | 0.693 | 0.768 | 0.684 |
| 94849_at   | 0.290 | 0.907 | 0.837 | 0.912 | 0.906 |
| 94850_at   | 0.318 | 1.042 | 1.137 | 0.993 | 1.164 |
| 94852_at   | 0.252 | 1.327 | 1.133 | 1.251 | 1.215 |
| 94853_at   | 0.382 | 1.040 | 1.065 | 1.107 | 1.165 |
| 94854_g_at | 0.478 | 0.990 | 1.085 | 1.037 | 1.068 |
| 94855_at   | 0.431 | 0.927 | 0.936 | 1.008 | 0.920 |
| 94856_r_at | 0.429 | 0.841 | 0.819 | 0.861 | 0.867 |
| 94857_at   | 0.219 | 1.013 | 1.033 | 0.991 | 1.085 |

|            |       |       |       |       |       |
|------------|-------|-------|-------|-------|-------|
| 94860_at   | 0.368 | 1.103 | 1.203 | 1.012 | 1.244 |
| 94861_at   | 0.496 | 1.096 | 1.127 | 1.070 | 1.110 |
| 94862_i_at | 0.379 | 1.047 | 1.022 | 1.011 | 1.080 |
| 94863_r_at | 0.302 | 1.034 | 1.005 | 0.990 | 1.040 |
| 94865_at   | 0.319 | 1.017 | 1.006 | 0.994 | 1.114 |
| 94866_at   | 0.504 | 0.915 | 0.891 | 0.942 | 0.894 |
| 94868_at   | 0.141 | 1.137 | 1.192 | 1.051 | 1.206 |
| 94869_at   | 0.379 | 1.009 | 0.990 | 0.932 | 1.044 |
| 94870_f_at | 0.255 | 0.922 | 1.007 | 0.929 | 1.034 |
| 94871_r_at | 0.508 | 1.145 | 1.223 | 1.106 | 1.252 |
| 94872_at   | 0.273 | 1.150 | 1.097 | 1.025 | 1.238 |
| 94874_at   | 0.403 | 0.944 | 0.908 | 0.946 | 0.965 |
| 94875_at   | 0.419 | 0.975 | 1.006 | 0.937 | 1.028 |
| 94876_f_at | 0.244 | 1.201 | 1.228 | 1.114 | 1.051 |
| 94877_at   | 0.407 | 0.905 | 0.833 | 0.931 | 0.857 |
| 94878_at   | 0.347 | 1.123 | 1.043 | 1.044 | 1.129 |
| 94881_at   | 0.341 | 1.002 | 1.053 | 1.151 | 1.138 |
| 94882_at   | 0.256 | 1.041 | 0.969 | 0.927 | 1.051 |
| 94885_at   | 0.112 | 1.076 | 0.997 | 1.034 | 0.991 |
| 94886_at   | 0.331 | 0.883 | 0.868 | 0.975 | 0.904 |
| 94889_at   | 0.393 | 1.152 | 1.206 | 1.098 | 1.159 |
| 94890_at   | 0.377 | 0.923 | 0.875 | 0.953 | 0.912 |
| 94891_s_at | 0.484 | 0.954 | 0.923 | 0.952 | 0.938 |
| 94892_r_at | 0.296 | 0.945 | 0.945 | 0.921 | 0.960 |
| 94893_at   | 0.051 | 1.023 | 0.929 | 1.013 | 1.042 |
| 94895_at   | 0.360 | 1.190 | 1.334 | 1.070 | 1.228 |
| 94896_at   | 0.081 | 0.904 | 0.942 | 0.989 | 0.931 |
| 94897_at   | 0.445 | 1.050 | 1.013 | 1.009 | 1.030 |
| 94898_at   | 0.422 | 1.227 | 1.170 | 1.060 | 1.226 |
| 94899_at   | 0.424 | 1.128 | 1.094 | 1.024 | 1.146 |
| 94900_at   | 0.371 | 0.981 | 0.936 | 0.965 | 0.972 |
| 94902_at   | 0.072 | 1.071 | 1.138 | 1.185 | 0.965 |
| 94903_at   | 0.365 | 1.210 | 1.237 | 1.019 | 1.256 |
| 94906_at   | 0.058 | 1.162 | 1.024 | 1.053 | 1.206 |
| 94907_f_at | 0.417 | 0.988 | 0.938 | 0.966 | 0.938 |
| 94908_r_at | 0.465 | 0.871 | 0.853 | 0.926 | 0.836 |
| 94909_at   | 0.475 | 1.150 | 1.156 | 1.049 | 1.180 |
| 94910_at   | 0.390 | 1.100 | 1.286 | 1.133 | 1.279 |
| 94912_at   | 0.387 | 1.143 | 1.157 | 1.027 | 1.197 |
| 94913_at   | 0.425 | 1.111 | 1.162 | 1.075 | 1.167 |
| 94914_at   | 0.301 | 0.880 | 0.876 | 0.963 | 0.831 |
| 94915_at   | 0.117 | 0.977 | 1.207 | 0.919 | 1.035 |
| 94916_at   | 0.290 | 1.052 | 1.107 | 1.017 | 1.091 |
| 94917_at   | 0.441 | 1.013 | 1.021 | 1.008 | 1.005 |
| 94918_at   | 0.219 | 0.980 | 0.954 | 0.918 | 0.953 |
| 94920_at   | 0.263 | 1.073 | 1.116 | 1.089 | 1.059 |
| 94921_i_at | 0.377 | 0.905 | 0.913 | 0.902 | 0.892 |

|            |       |       |       |       |       |
|------------|-------|-------|-------|-------|-------|
| 94922_i_at | 0.400 | 1.111 | 1.106 | 1.024 | 1.164 |
| 94923_f_at | 0.159 | 1.260 | 1.123 | 1.035 | 1.217 |
| 94924_at   | 0.112 | 0.968 | 0.966 | 1.041 | 1.030 |
| 94925_at   | 0.458 | 1.093 | 1.092 | 1.090 | 1.160 |
| 94927_at   | 0.411 | 0.982 | 0.931 | 1.030 | 0.959 |
| 94928_at   | 0.391 | 1.289 | 1.337 | 1.181 | 1.467 |
| 94929_at   | 0.095 | 1.194 | 1.381 | 1.002 | 1.239 |
| 94930_at   | 0.287 | 0.897 | 0.848 | 0.959 | 0.858 |
| 94931_at   | 0.115 | 0.941 | 1.142 | 0.908 | 1.187 |
| 94932_at   | 0.251 | 1.067 | 0.979 | 0.972 | 0.947 |
| 94933_at   | 0.076 | 0.961 | 0.971 | 0.911 | 1.051 |
| 94934_at   | 0.288 | 0.891 | 0.918 | 0.958 | 0.937 |
| 94935_at   | 0.312 | 1.023 | 0.975 | 1.017 | 1.015 |
| 94936_at   | 0.172 | 0.971 | 0.918 | 1.015 | 0.993 |
| 94937_at   | 0.200 | 1.026 | 1.025 | 0.967 | 1.074 |
| 94939_at   | 0.072 | 0.930 | 1.447 | 0.824 | 1.273 |
| 94940_at   | 0.355 | 1.023 | 0.972 | 1.114 | 0.997 |
| 94941_at   | 0.486 | 1.044 | 1.028 | 1.031 | 1.044 |
| 94942_at   | 0.330 | 0.928 | 0.982 | 0.972 | 0.955 |
| 94944_at   | 0.251 | 0.928 | 0.848 | 0.984 | 0.924 |
| 94945_at   | 0.053 | 0.908 | 0.938 | 0.931 | 0.997 |
| 94946_at   | 0.345 | 0.981 | 0.935 | 1.027 | 0.994 |
| 94947_g_at | 0.298 | 1.076 | 1.129 | 1.161 | 1.270 |
| 94948_at   | 0.325 | 0.970 | 0.948 | 1.011 | 0.959 |
| 94951_at   | 0.392 | 1.074 | 1.048 | 1.031 | 1.004 |
| 94952_at   | 0.231 | 1.033 | 0.934 | 0.956 | 1.002 |
| 94953_at   | 0.096 | 0.871 | 0.937 | 0.857 | 0.985 |
| 94954_at   | 0.287 | 1.102 | 1.152 | 0.977 | 1.144 |
| 94955_at   | 0.494 | 1.004 | 1.050 | 1.051 | 1.053 |
| 94956_at   | 0.333 | 0.996 | 0.957 | 0.951 | 1.015 |
| 94957_at   | 0.232 | 1.056 | 1.078 | 1.106 | 1.017 |
| 94958_at   | 0.390 | 0.947 | 0.935 | 0.963 | 0.964 |
| 94961_at   | 0.332 | 0.898 | 0.884 | 0.953 | 0.924 |
| 94962_g_at | 0.402 | 0.903 | 0.883 | 0.965 | 0.942 |
| 94963_at   | 0.297 | 1.203 | 1.132 | 0.996 | 1.185 |
| 94964_at   | 0.289 | 0.826 | 0.865 | 0.953 | 0.950 |
| 94966_at   | 0.233 | 0.985 | 1.096 | 1.194 | 1.073 |
| 94967_at   | 0.409 | 1.075 | 0.995 | 0.999 | 1.059 |
| 94968_at   | 0.494 | 1.035 | 1.047 | 1.009 | 1.038 |
| 94969_at   | 0.276 | 0.776 | 0.800 | 0.900 | 0.833 |
| 94970_at   | 0.289 | 1.043 | 1.053 | 1.018 | 1.124 |
| 94971_at   | 0.247 | 0.917 | 0.948 | 0.961 | 0.987 |
| 94972_at   | 0.307 | 0.914 | 0.907 | 0.916 | 0.977 |
| 94973_at   | 0.209 | 1.203 | 1.177 | 1.025 | 1.174 |
| 94975_at   | 0.415 | 1.167 | 1.212 | 1.004 | 1.325 |
| 94976_at   | 0.119 | 1.249 | 1.059 | 1.062 | 1.101 |
| 94977_at   | 0.408 | 1.214 | 1.179 | 1.046 | 1.216 |

|            |       |       |       |       |       |
|------------|-------|-------|-------|-------|-------|
| 94978_at   | 0.112 | 0.978 | 0.928 | 0.964 | 0.904 |
| 94979_at   | 0.384 | 1.280 | 1.223 | 1.093 | 1.225 |
| 94980_at   | 0.232 | 1.065 | 1.037 | 0.944 | 1.071 |
| 94981_i_at | 0.091 | 1.021 | 0.948 | 0.902 | 0.986 |
| 94982_f_at | 0.141 | 1.258 | 1.115 | 0.981 | 1.202 |
| 94983_at   | 0.323 | 1.065 | 1.070 | 0.948 | 1.050 |
| 94985_at   | 0.507 | 1.147 | 1.155 | 1.097 | 1.169 |
| 94986_at   | 0.237 | 0.841 | 0.838 | 0.952 | 0.830 |
| 94987_at   | 0.386 | 0.862 | 0.811 | 0.909 | 0.817 |
| 94988_at   | 0.488 | 0.864 | 0.865 | 0.908 | 0.827 |
| 94989_at   | 0.332 | 1.285 | 1.219 | 1.108 | 1.346 |
| 94990_at   | 0.174 | 0.989 | 0.910 | 1.051 | 0.960 |
| 94991_at   | 0.448 | 1.226 | 1.220 | 1.065 | 1.180 |
| 94992_at   | 0.260 | 1.156 | 1.273 | 1.051 | 1.188 |
| 94993_f_at | 0.279 | 0.994 | 1.087 | 0.971 | 1.081 |
| 94994_at   | 0.212 | 0.912 | 0.906 | 0.928 | 0.955 |
| 94995_at   | 0.371 | 0.930 | 0.909 | 0.924 | 0.961 |
| 94997_at   | 0.204 | 1.144 | 1.086 | 0.936 | 1.213 |
| 94998_at   | 0.382 | 1.134 | 1.112 | 1.029 | 1.170 |
| 94999_at   | 0.408 | 0.959 | 0.881 | 0.998 | 0.888 |
| 95000_g_at | 0.218 | 0.847 | 0.875 | 0.944 | 0.903 |
| 95001_at   | 0.281 | 1.132 | 1.168 | 1.006 | 1.129 |
| 95002_at   | 0.222 | 1.270 | 1.218 | 1.106 | 1.155 |
| 95003_at   | 0.238 | 1.085 | 1.051 | 0.880 | 1.138 |
| 95004_at   | 0.077 | 0.961 | 0.839 | 0.984 | 0.924 |
| 95007_at   | 0.325 | 1.073 | 1.018 | 1.049 | 1.033 |
| 95009_at   | 0.342 | 0.959 | 0.897 | 0.958 | 0.985 |
| 95010_at   | 0.481 | 1.204 | 1.239 | 1.122 | 1.205 |
| 95011_at   | 0.244 | 0.982 | 0.960 | 0.992 | 1.060 |
| 95012_at   | 0.323 | 0.905 | 0.908 | 0.972 | 0.874 |
| 95014_at   | 0.424 | 0.943 | 0.936 | 0.925 | 0.938 |
| 95015_at   | 0.250 | 0.901 | 0.891 | 0.957 | 0.946 |
| 95016_at   | 0.281 | 1.225 | 1.079 | 1.078 | 1.130 |
| 95018_r_at | 0.318 | 1.096 | 1.060 | 1.023 | 1.028 |
| 95019_at   | 0.326 | 1.056 | 1.118 | 1.017 | 1.121 |
| 95020_at   | 0.210 | 1.200 | 1.175 | 1.102 | 1.010 |
| 95021_at   | 0.281 | 1.183 | 1.125 | 1.022 | 1.105 |
| 95022_at   | 0.246 | 1.182 | 1.117 | 1.085 | 1.327 |
| 95023_at   | 0.412 | 1.175 | 1.165 | 1.139 | 1.121 |
| 95024_at   | 0.196 | 1.203 | 1.121 | 0.937 | 1.084 |
| 95025_at   | 0.226 | 0.924 | 0.912 | 0.968 | 0.922 |
| 95026_at   | 0.336 | 0.961 | 0.945 | 1.119 | 0.993 |
| 95027_at   | 0.072 | 0.925 | 0.867 | 1.002 | 0.898 |
| 95028_r_at | 0.066 | 0.969 | 0.899 | 0.858 | 0.849 |
| 95029_at   | 0.490 | 0.988 | 0.997 | 0.972 | 0.973 |
| 95030_at   | 0.265 | 0.914 | 0.798 | 0.933 | 0.845 |
| 95031_at   | 0.434 | 1.091 | 1.100 | 1.143 | 1.153 |

|            |       |       |       |       |       |
|------------|-------|-------|-------|-------|-------|
| 95032_at   | 0.096 | 0.973 | 1.119 | 1.032 | 1.220 |
| 95033_at   | 0.198 | 1.106 | 0.991 | 0.945 | 1.090 |
| 95034_f_at | 0.260 | 1.164 | 1.055 | 1.038 | 1.037 |
| 95035_at   | 0.331 | 1.002 | 0.961 | 1.034 | 0.970 |
| 95036_at   | 0.461 | 0.835 | 0.864 | 0.890 | 0.837 |
| 95037_at   | 0.067 | 1.131 | 1.092 | 0.971 | 1.070 |
| 95040_at   | 0.459 | 1.169 | 1.099 | 1.109 | 1.119 |
| 95041_at   | 0.441 | 0.958 | 0.932 | 0.948 | 0.960 |
| 95042_at   | 0.169 | 1.076 | 1.173 | 1.024 | 1.124 |
| 95043_at   | 0.311 | 0.910 | 0.909 | 0.951 | 0.858 |
| 95044_at   | 0.324 | 1.016 | 0.957 | 0.971 | 0.982 |
| 95045_at   | 0.481 | 1.036 | 1.074 | 1.022 | 1.086 |
| 95046_s_at | 0.428 | 0.989 | 0.954 | 0.950 | 0.950 |
| 95048_at   | 0.502 | 0.835 | 0.804 | 0.885 | 0.799 |
| 95049_at   | 0.171 | 1.059 | 1.132 | 0.908 | 1.189 |
| 95050_at   | 0.330 | 0.887 | 0.886 | 0.928 | 0.991 |
| 95052_at   | 0.146 | 0.862 | 0.775 | 0.992 | 0.832 |
| 95053_s_at | 0.425 | 0.932 | 1.025 | 1.051 | 0.966 |
| 95054_at   | 0.417 | 1.115 | 1.279 | 1.096 | 1.195 |
| 95056_r_at | 0.340 | 0.944 | 0.952 | 1.013 | 0.977 |
| 95057_at   | 0.459 | 1.094 | 1.080 | 1.003 | 1.102 |
| 95058_f_at | 0.429 | 1.203 | 1.151 | 1.238 | 1.270 |
| 95059_at   | 0.278 | 1.162 | 1.260 | 1.043 | 1.244 |
| 95060_at   | 0.371 | 1.015 | 1.031 | 1.054 | 1.082 |
| 95061_at   | 0.240 | 1.106 | 1.096 | 0.990 | 1.173 |
| 95062_at   | 0.392 | 1.416 | 1.486 | 1.237 | 1.357 |
| 95063_at   | 0.238 | 1.028 | 0.926 | 1.026 | 0.995 |
| 95064_at   | 0.424 | 1.276 | 1.218 | 1.287 | 1.287 |
| 95065_at   | 0.407 | 0.958 | 0.958 | 0.956 | 0.923 |
| 95066_at   | 0.467 | 1.181 | 1.255 | 1.109 | 1.291 |
| 95067_at   | 0.439 | 1.069 | 1.098 | 1.010 | 1.124 |
| 95068_at   | 0.472 | 1.050 | 1.069 | 0.990 | 1.070 |
| 95069_at   | 0.294 | 1.151 | 1.160 | 1.025 | 1.088 |
| 95070_at   | 0.400 | 1.213 | 1.310 | 1.082 | 1.286 |
| 95071_at   | 0.291 | 0.892 | 0.821 | 0.947 | 0.888 |
| 95072_at   | 0.310 | 1.023 | 1.041 | 1.082 | 0.991 |
| 95073_at   | 0.188 | 0.953 | 0.896 | 0.871 | 0.930 |
| 95074_at   | 0.467 | 1.084 | 1.054 | 1.068 | 1.075 |
| 95075_at   | 0.347 | 0.912 | 0.886 | 0.909 | 1.011 |
| 95076_at   | 0.137 | 0.999 | 1.014 | 0.978 | 1.096 |
| 95077_at   | 0.380 | 1.045 | 1.055 | 0.980 | 1.076 |
| 95078_at   | 0.233 | 1.012 | 1.007 | 1.080 | 0.969 |
| 95079_at   | 0.196 | 1.192 | 1.076 | 0.998 | 1.127 |
| 95081_at   | 0.313 | 1.038 | 0.966 | 0.971 | 0.958 |
| 95082_at   | 0.120 | 1.022 | 0.833 | 1.023 | 0.905 |
| 95083_at   | 0.053 | 0.818 | 0.783 | 1.060 | 0.868 |
| 95084_f_at | 0.492 | 1.021 | 0.983 | 0.989 | 1.002 |

|            |       |       |       |       |       |
|------------|-------|-------|-------|-------|-------|
| 95085_r_at | 0.314 | 0.862 | 0.861 | 0.869 | 0.736 |
| 95086_at   | 0.204 | 1.161 | 1.203 | 1.016 | 1.157 |
| 95090_at   | 0.363 | 0.940 | 0.970 | 0.982 | 0.961 |
| 95091_at   | 0.206 | 0.914 | 1.016 | 0.922 | 0.964 |
| 95092_at   | 0.228 | 1.314 | 1.295 | 0.974 | 1.250 |
| 95093_at   | 0.323 | 0.902 | 0.896 | 0.929 | 0.949 |
| 95094_g_at | 0.290 | 1.050 | 1.079 | 1.019 | 1.106 |
| 95095_at   | 0.136 | 1.112 | 1.074 | 1.000 | 1.044 |
| 95096_at   | 0.431 | 1.229 | 1.229 | 1.054 | 1.265 |
| 95097_at   | 0.350 | 1.052 | 1.132 | 0.942 | 1.089 |
| 95098_at   | 0.384 | 0.891 | 0.871 | 0.936 | 0.904 |
| 95100_at   | 0.350 | 1.109 | 1.196 | 0.994 | 1.135 |
| 95101_at   | 0.379 | 1.043 | 1.009 | 1.014 | 1.078 |
| 95102_at   | 0.434 | 0.963 | 1.015 | 0.939 | 0.983 |
| 95103_at   | 0.278 | 1.122 | 1.083 | 0.992 | 1.073 |
| 95104_at   | 0.260 | 1.166 | 1.104 | 1.063 | 1.079 |
| 95105_at   | 0.441 | 1.122 | 1.238 | 1.076 | 1.238 |
| 95108_at   | 0.408 | 0.868 | 0.826 | 0.919 | 0.882 |
| 95109_at   | 0.323 | 1.029 | 1.028 | 0.954 | 0.926 |
| 95110_at   | 0.417 | 0.872 | 0.877 | 0.927 | 0.925 |
| 95111_i_at | 0.233 | 0.881 | 0.874 | 0.924 | 0.908 |
| 95112_f_at | 0.136 | 1.100 | 1.060 | 1.002 | 1.031 |
| 95113_at   | 0.325 | 0.855 | 0.827 | 0.938 | 0.851 |
| 95114_s_at | 0.145 | 1.035 | 1.084 | 0.997 | 0.972 |
| 95117_at   | 0.171 | 1.407 | 1.288 | 1.108 | 1.196 |
| 95118_r_at | 0.240 | 0.920 | 0.926 | 0.884 | 0.948 |
| 95119_at   | 0.246 | 0.919 | 0.955 | 1.026 | 0.942 |
| 95120_at   | 0.280 | 1.219 | 1.101 | 1.067 | 1.080 |
| 95121_at   | 0.480 | 0.990 | 1.023 | 0.979 | 0.989 |
| 95122_g_at | 0.254 | 1.087 | 0.982 | 0.975 | 1.047 |
| 95123_at   | 0.205 | 1.128 | 1.026 | 1.040 | 1.027 |
| 95124_i_at | 0.173 | 1.143 | 1.086 | 0.928 | 1.165 |
| 95125_f_at | 0.470 | 1.029 | 1.015 | 1.003 | 1.026 |
| 95128_at   | 0.411 | 1.134 | 1.145 | 1.045 | 1.148 |
| 95129_at   | 0.264 | 1.187 | 1.088 | 1.114 | 1.005 |
| 95131_f_at | 0.449 | 0.964 | 1.032 | 0.951 | 1.036 |
| 95132_r_at | 0.249 | 0.910 | 0.947 | 0.934 | 1.020 |
| 95133_at   | 0.109 | 0.941 | 0.954 | 1.018 | 0.976 |
| 95134_at   | 0.375 | 0.789 | 0.852 | 0.900 | 0.895 |
| 95135_at   | 0.234 | 1.302 | 1.204 | 1.102 | 1.198 |
| 95136_at   | 0.236 | 1.022 | 0.979 | 0.948 | 1.022 |
| 95137_at   | 0.142 | 1.130 | 1.188 | 0.998 | 1.169 |
| 95138_at   | 0.353 | 1.059 | 0.986 | 1.048 | 1.061 |
| 95139_at   | 0.291 | 0.994 | 1.040 | 1.074 | 1.041 |
| 95140_at   | 0.508 | 1.119 | 1.167 | 1.070 | 1.166 |
| 95141_at   | 0.368 | 0.974 | 0.938 | 0.964 | 0.920 |
| 95142_s_at | 0.207 | 1.140 | 1.257 | 1.002 | 1.228 |

|            |       |       |       |       |       |
|------------|-------|-------|-------|-------|-------|
| 95144_at   | 0.136 | 1.072 | 1.100 | 0.979 | 1.064 |
| 95146_at   | 0.468 | 0.949 | 1.005 | 0.925 | 1.028 |
| 95147_at   | 0.308 | 1.043 | 1.132 | 1.104 | 1.060 |
| 95148_at   | 0.251 | 0.952 | 1.092 | 1.058 | 0.995 |
| 95149_at   | 0.302 | 1.112 | 1.236 | 1.045 | 1.101 |
| 95150_at   | 0.238 | 0.989 | 1.082 | 0.955 | 0.998 |
| 95151_at   | 0.200 | 0.844 | 0.962 | 0.914 | 0.919 |
| 95152_g_at | 0.196 | 0.889 | 0.969 | 0.956 | 0.919 |
| 95153_at   | 0.089 | 1.226 | 1.346 | 0.981 | 1.203 |
| 95154_at   | 0.291 | 0.856 | 0.886 | 0.923 | 0.919 |
| 95155_at   | 0.401 | 1.015 | 0.971 | 0.977 | 0.940 |
| 95156_g_at | 0.151 | 0.962 | 0.868 | 0.952 | 0.841 |
| 95157_at   | 0.325 | 1.005 | 0.911 | 0.974 | 0.972 |
| 95158_at   | 0.126 | 1.040 | 1.001 | 0.894 | 1.013 |
| 95159_at   | 0.305 | 0.984 | 1.053 | 1.064 | 1.017 |
| 95161_at   | 0.034 | 1.161 | 0.980 | 1.003 | 0.974 |
| 95164_at   | 0.496 | 0.869 | 0.860 | 0.893 | 0.834 |
| 95165_at   | 0.245 | 0.834 | 0.853 | 0.936 | 0.903 |
| 95177_at   | 0.420 | 1.015 | 1.008 | 1.011 | 1.025 |
| 95182_at   | 0.377 | 0.900 | 0.865 | 0.941 | 0.933 |
| 95183_i_at | 0.359 | 0.788 | 0.787 | 0.885 | 0.804 |
| 95184_f_at | 0.385 | 0.692 | 0.683 | 0.619 | 0.824 |
| 95215_f_at | 0.069 | 0.979 | 0.970 | 1.093 | 1.004 |
| 95228_f_at | 0.377 | 0.904 | 0.859 | 0.942 | 0.933 |
| 95232_at   | 0.256 | 1.161 | 1.181 | 1.162 | 1.085 |
| 95244_at   | 0.427 | 0.870 | 0.892 | 0.875 | 0.899 |
| 95246_at   | 0.500 | 0.838 | 0.826 | 0.851 | 0.841 |
| 95247_at   | 0.388 | 0.889 | 0.838 | 0.948 | 0.886 |
| 95248_at   | 0.114 | 0.847 | 0.828 | 0.868 | 0.919 |
| 95249_at   | 0.367 | 1.027 | 0.982 | 0.995 | 0.998 |
| 95275_at   | 0.465 | 0.831 | 0.819 | 0.884 | 0.843 |
| 95281_at   | 0.339 | 0.945 | 0.910 | 0.960 | 0.943 |
| 95282_at   | 0.169 | 1.160 | 0.889 | 0.997 | 0.867 |
| 95283_at   | 0.488 | 0.911 | 0.890 | 0.946 | 0.880 |
| 95284_at   | 0.250 | 0.951 | 1.025 | 0.962 | 0.919 |
| 95285_at   | 0.332 | 0.997 | 1.008 | 0.937 | 1.060 |
| 95286_at   | 0.334 | 1.094 | 0.977 | 1.049 | 1.082 |
| 95287_at   | 0.468 | 0.937 | 0.947 | 0.966 | 0.979 |
| 95288_i_at | 0.386 | 1.003 | 1.016 | 1.016 | 1.121 |
| 95289_r_at | 0.285 | 1.078 | 1.033 | 1.031 | 1.078 |
| 95290_at   | 0.432 | 0.876 | 0.810 | 0.905 | 0.800 |
| 95291_r_at | 0.483 | 1.022 | 0.991 | 1.017 | 0.995 |
| 95292_at   | 0.159 | 0.894 | 1.004 | 0.926 | 0.976 |
| 95293_at   | 0.328 | 0.857 | 0.819 | 0.929 | 0.887 |
| 95294_at   | 0.367 | 0.900 | 0.928 | 0.973 | 0.917 |
| 95295_s_at | 0.351 | 0.963 | 0.988 | 1.004 | 1.038 |
| 95296_r_at | 0.391 | 0.787 | 0.709 | 0.841 | 0.778 |

|            |       |       |       |       |       |
|------------|-------|-------|-------|-------|-------|
| 95297_at   | 0.099 | 0.992 | 1.023 | 0.953 | 0.894 |
| 95298_at   | 0.329 | 0.965 | 0.983 | 1.048 | 0.996 |
| 95299_at   | 0.300 | 0.877 | 0.901 | 0.981 | 0.969 |
| 95300_at   | 0.480 | 0.946 | 0.900 | 0.980 | 0.933 |
| 95301_at   | 0.206 | 0.895 | 0.954 | 0.969 | 0.955 |
| 95302_at   | 0.377 | 0.849 | 0.852 | 0.915 | 0.908 |
| 95303_at   | 0.424 | 0.860 | 0.888 | 0.940 | 0.882 |
| 95304_at   | 0.434 | 0.957 | 0.964 | 1.000 | 0.971 |
| 95305_at   | 0.272 | 0.843 | 0.855 | 0.941 | 0.898 |
| 95306_at   | 0.340 | 0.860 | 0.828 | 0.933 | 0.836 |
| 95307_at   | 0.497 | 0.903 | 0.869 | 0.946 | 0.891 |
| 95308_at   | 0.232 | 1.037 | 0.908 | 1.002 | 0.973 |
| 95309_at   | 0.433 | 0.918 | 0.856 | 0.958 | 0.882 |
| 95310_at   | 0.483 | 0.923 | 0.921 | 0.958 | 0.923 |
| 95311_at   | 0.323 | 0.832 | 0.819 | 0.933 | 0.806 |
| 95312_at   | 0.328 | 0.864 | 0.833 | 0.919 | 0.899 |
| 95313_at   | 0.260 | 0.908 | 1.026 | 1.068 | 1.164 |
| 95314_at   | 0.440 | 0.882 | 0.879 | 0.926 | 0.924 |
| 95315_at   | 0.441 | 0.875 | 0.886 | 0.934 | 0.888 |
| 95316_at   | 0.384 | 0.895 | 0.809 | 0.877 | 0.828 |
| 95317_at   | 0.475 | 0.822 | 0.780 | 0.849 | 0.769 |
| 95318_at   | 0.232 | 0.964 | 0.888 | 0.942 | 0.914 |
| 95319_at   | 0.244 | 0.815 | 0.784 | 0.936 | 0.842 |
| 95320_at   | 0.264 | 0.916 | 1.015 | 0.964 | 0.988 |
| 95321_at   | 0.382 | 0.886 | 0.862 | 0.950 | 0.842 |
| 95322_g_at | 0.387 | 0.870 | 0.854 | 0.930 | 0.904 |
| 95323_at   | 0.091 | 0.847 | 0.947 | 0.931 | 0.883 |
| 95324_at   | 0.472 | 0.878 | 0.878 | 0.962 | 0.849 |
| 95325_at   | 0.235 | 0.873 | 0.893 | 0.953 | 0.927 |
| 95326_at   | 0.167 | 0.891 | 0.943 | 1.032 | 0.976 |
| 95327_at   | 0.461 | 0.899 | 0.835 | 0.892 | 0.864 |
| 95328_at   | 0.468 | 0.935 | 0.917 | 0.957 | 0.929 |
| 95329_at   | 0.228 | 0.876 | 0.981 | 0.949 | 0.877 |
| 95330_at   | 0.244 | 0.930 | 0.879 | 0.968 | 0.919 |
| 95331_at   | 0.283 | 0.894 | 0.881 | 0.960 | 0.887 |
| 95332_at   | 0.432 | 0.928 | 0.930 | 0.986 | 0.945 |
| 95333_at   | 0.385 | 0.814 | 0.784 | 0.822 | 0.849 |
| 95334_at   | 0.271 | 0.819 | 0.838 | 0.940 | 0.826 |
| 95335_at   | 0.390 | 0.846 | 0.822 | 0.918 | 0.853 |
| 95336_at   | 0.390 | 0.809 | 0.739 | 0.867 | 0.813 |
| 95337_at   | 0.488 | 0.966 | 0.984 | 0.980 | 0.975 |
| 95338_s_at | 0.106 | 1.200 | 4.683 | 1.088 | 2.327 |
| 95339_r_at | 0.072 | 1.329 | 3.486 | 1.084 | 2.160 |
| 95340_at   | 0.472 | 0.973 | 0.985 | 1.003 | 0.964 |
| 95341_at   | 0.354 | 0.858 | 0.887 | 0.932 | 0.883 |
| 95342_at   | 0.406 | 0.880 | 0.862 | 0.867 | 0.895 |
| 95343_at   | 0.204 | 0.892 | 0.874 | 1.028 | 0.861 |



|            |       |       |       |       |       |
|------------|-------|-------|-------|-------|-------|
| 95344_at   | 0.377 | 0.925 | 0.939 | 0.982 | 0.929 |
| 95345_at   | 0.316 | 0.964 | 0.921 | 1.009 | 0.910 |
| 95346_at   | 0.410 | 0.910 | 0.865 | 0.906 | 0.880 |
| 95347_at   | 0.477 | 0.847 | 0.820 | 0.851 | 0.808 |
| 95348_at   | 0.240 | 0.993 | 1.757 | 0.997 | 0.944 |
| 95349_g_at | 0.241 | 1.006 | 1.460 | 1.070 | 0.969 |
| 95350_at   | 0.397 | 0.884 | 0.794 | 0.878 | 0.834 |
| 95351_at   | 0.478 | 1.028 | 0.991 | 1.057 | 1.013 |
| 95352_at   | 0.438 | 0.971 | 0.990 | 0.998 | 0.989 |
| 95353_at   | 0.440 | 0.904 | 0.865 | 0.962 | 0.888 |
| 95354_at   | 0.332 | 0.911 | 0.889 | 0.895 | 0.919 |
| 95355_at   | 0.380 | 1.107 | 1.207 | 1.036 | 1.093 |
| 95356_at   | 0.272 | 1.238 | 1.238 | 1.102 | 1.327 |
| 95357_at   | 0.210 | 0.842 | 0.816 | 0.910 | 0.888 |
| 95358_at   | 0.422 | 1.053 | 1.074 | 1.016 | 1.090 |
| 95359_at   | 0.129 | 1.096 | 0.891 | 0.988 | 0.884 |
| 95360_at   | 0.480 | 1.060 | 1.044 | 1.079 | 1.084 |
| 95363_at   | 0.134 | 0.934 | 0.862 | 0.994 | 0.854 |
| 95364_at   | 0.025 | 1.077 | 1.664 | 1.142 | 1.306 |
| 95366_at   | 0.356 | 0.889 | 0.813 | 0.877 | 0.951 |
| 95368_at   | 0.363 | 1.031 | 0.956 | 1.024 | 1.062 |
| 95369_at   | 0.265 | 0.813 | 0.832 | 0.891 | 0.844 |
| 95370_at   | 0.486 | 0.949 | 0.911 | 0.980 | 0.930 |
| 95371_g_at | 0.308 | 0.847 | 0.853 | 0.953 | 0.894 |
| 95372_at   | 0.458 | 0.885 | 0.827 | 0.884 | 0.838 |
| 95373_at   | 0.025 | 0.827 | 1.023 | 0.791 | 1.019 |
| 95374_f_at | 0.099 | 0.873 | 0.827 | 0.984 | 0.855 |
| 95375_r_at | 0.288 | 0.814 | 0.748 | 0.907 | 0.730 |
| 95376_at   | 0.295 | 0.843 | 0.809 | 0.925 | 0.859 |
| 95377_at   | 0.458 | 0.876 | 0.867 | 0.899 | 0.823 |
| 95378_at   | 0.169 | 0.873 | 0.822 | 0.980 | 0.884 |
| 95379_at   | 0.115 | 0.826 | 0.787 | 0.862 | 0.883 |
| 95380_at   | 0.291 | 0.889 | 0.953 | 0.866 | 0.937 |
| 95381_at   | 0.408 | 0.941 | 0.872 | 0.943 | 0.898 |
| 95382_at   | 0.488 | 0.928 | 0.902 | 0.932 | 0.921 |
| 95383_at   | 0.206 | 0.883 | 0.866 | 0.971 | 0.856 |
| 95385_at   | 0.323 | 0.899 | 0.845 | 0.946 | 0.872 |
| 95386_at   | 0.178 | 1.229 | 1.223 | 1.025 | 1.247 |
| 95387_f_at | 0.170 | 0.975 | 1.070 | 0.979 | 0.998 |
| 95388_at   | 0.399 | 0.913 | 0.855 | 0.910 | 0.903 |
| 95389_at   | 0.329 | 0.972 | 0.908 | 0.996 | 0.934 |
| 95390_at   | 0.276 | 0.911 | 0.827 | 0.974 | 0.900 |
| 95391_at   | 0.490 | 0.838 | 0.805 | 0.886 | 0.834 |
| 95392_at   | 0.157 | 0.920 | 0.973 | 1.089 | 1.025 |
| 95393_at   | 0.241 | 0.960 | 1.010 | 1.113 | 1.148 |
| 95395_at   | 0.421 | 1.261 | 1.207 | 0.990 | 1.239 |
| 95396_at   | 0.428 | 1.072 | 1.066 | 1.047 | 1.055 |

|            |       |       |       |       |       |
|------------|-------|-------|-------|-------|-------|
| 95397_at   | 0.348 | 1.196 | 1.049 | 1.113 | 1.144 |
| 95398_at   | 0.388 | 0.887 | 0.874 | 0.966 | 0.885 |
| 95399_at   | 0.444 | 0.861 | 0.847 | 0.888 | 0.803 |
| 95400_i_at | 0.486 | 1.008 | 0.988 | 0.989 | 1.029 |
| 95401_at   | 0.145 | 1.036 | 0.943 | 1.023 | 0.967 |
| 95404_at   | 0.415 | 1.055 | 1.123 | 1.030 | 1.179 |
| 95405_at   | 0.397 | 1.062 | 1.060 | 1.016 | 1.073 |
| 95406_at   | 0.077 | 1.054 | 1.030 | 0.932 | 1.061 |
| 95407_at   | 0.315 | 1.022 | 1.052 | 1.102 | 1.015 |
| 95408_at   | 0.188 | 1.184 | 1.256 | 0.925 | 1.237 |
| 95409_at   | 0.128 | 0.953 | 0.987 | 0.940 | 1.061 |
| 95410_s_at | 0.463 | 0.853 | 0.855 | 0.914 | 0.856 |
| 95411_at   | 0.361 | 1.134 | 1.126 | 0.983 | 1.152 |
| 95412_at   | 0.441 | 1.189 | 1.209 | 1.025 | 1.179 |
| 95413_at   | 0.260 | 0.920 | 0.943 | 0.986 | 0.996 |
| 95414_i_at | 0.093 | 1.005 | 0.916 | 0.920 | 0.990 |
| 95415_f_at | 0.363 | 1.250 | 1.269 | 1.137 | 1.253 |
| 95416_at   | 0.371 | 1.076 | 1.104 | 1.006 | 1.123 |
| 95417_at   | 0.347 | 1.027 | 1.035 | 0.936 | 1.062 |
| 95418_at   | 0.233 | 1.065 | 0.980 | 1.004 | 1.122 |
| 95419_at   | 0.184 | 1.303 | 1.311 | 1.061 | 1.390 |
| 95420_at   | 0.342 | 1.023 | 1.115 | 1.038 | 1.105 |
| 95423_at   | 0.205 | 1.015 | 1.244 | 1.025 | 0.948 |
| 95424_at   | 0.277 | 1.174 | 1.240 | 1.032 | 1.204 |
| 95425_at   | 0.495 | 1.168 | 1.159 | 1.111 | 1.181 |
| 95426_at   | 0.266 | 1.001 | 0.935 | 1.172 | 0.983 |
| 95427_at   | 0.444 | 1.079 | 1.116 | 1.028 | 1.075 |
| 95428_at   | 0.176 | 0.889 | 0.950 | 0.921 | 0.974 |
| 95430_f_at | 0.401 | 1.292 | 1.459 | 1.146 | 1.516 |
| 95431_at   | 0.211 | 1.116 | 1.202 | 0.978 | 1.295 |
| 95432_f_at | 0.277 | 1.299 | 1.432 | 1.125 | 1.375 |
| 95433_at   | 0.337 | 1.054 | 1.089 | 0.972 | 1.028 |
| 95434_at   | 0.046 | 0.982 | 1.151 | 0.919 | 1.126 |
| 95435_at   | 0.335 | 1.068 | 1.052 | 1.031 | 1.011 |
| 95436_at   | 0.390 | 0.899 | 0.872 | 0.964 | 0.853 |
| 95437_at   | 0.263 | 1.032 | 0.997 | 1.008 | 0.995 |
| 95438_at   | 0.290 | 1.090 | 1.050 | 1.049 | 1.110 |
| 95439_at   | 0.117 | 0.956 | 0.955 | 1.039 | 1.002 |
| 95440_at   | 0.283 | 1.094 | 0.974 | 1.057 | 1.032 |
| 95441_at   | 0.346 | 0.980 | 1.153 | 0.994 | 1.024 |
| 95442_at   | 0.342 | 0.932 | 0.895 | 0.883 | 0.961 |
| 95444_at   | 0.145 | 1.207 | 1.539 | 1.118 | 1.204 |
| 95445_at   | 0.266 | 1.064 | 1.006 | 1.071 | 1.019 |
| 95446_at   | 0.314 | 1.099 | 1.211 | 1.027 | 1.166 |
| 95447_at   | 0.139 | 0.885 | 0.948 | 0.883 | 1.011 |
| 95448_at   | 0.253 | 1.001 | 1.116 | 0.895 | 1.146 |
| 95449_at   | 0.383 | 1.016 | 1.037 | 1.053 | 1.021 |

|            |       |       |       |       |       |
|------------|-------|-------|-------|-------|-------|
| 95450_at   | 0.364 | 0.959 | 0.916 | 0.981 | 0.896 |
| 95451_at   | 0.279 | 1.168 | 1.226 | 1.085 | 1.097 |
| 95452_i_at | 0.373 | 0.951 | 0.877 | 0.945 | 0.922 |
| 95453_f_at | 0.371 | 1.176 | 1.278 | 1.122 | 1.125 |
| 95454_at   | 0.478 | 0.870 | 0.817 | 0.888 | 0.852 |
| 95455_at   | 0.463 | 0.962 | 0.968 | 1.015 | 0.982 |
| 95456_r_at | 0.136 | 0.960 | 0.979 | 0.882 | 1.030 |
| 95457_at   | 0.401 | 1.386 | 1.392 | 1.303 | 1.253 |
| 95458_s_at | 0.117 | 1.211 | 1.173 | 0.997 | 1.201 |
| 95460_at   | 0.240 | 1.090 | 1.202 | 1.017 | 1.188 |
| 95462_at   | 0.299 | 1.156 | 1.167 | 1.180 | 1.091 |
| 95464_at   | 0.221 | 0.888 | 0.942 | 0.999 | 0.941 |
| 95465_s_at | 0.154 | 0.948 | 1.092 | 1.024 | 1.150 |
| 95466_at   | 0.250 | 0.883 | 1.067 | 0.992 | 0.989 |
| 95467_at   | 0.427 | 1.059 | 1.045 | 0.954 | 1.070 |
| 95468_at   | 0.051 | 1.097 | 0.981 | 1.126 | 0.993 |
| 95469_at   | 0.444 | 0.901 | 0.855 | 0.935 | 0.892 |
| 95470_at   | 0.125 | 1.124 | 1.045 | 0.951 | 1.090 |
| 95471_at   | 0.117 | 1.318 | 1.025 | 1.275 | 1.195 |
| 95472_f_at | 0.291 | 0.976 | 1.104 | 0.952 | 1.002 |
| 95473_s_at | 0.075 | 1.096 | 1.177 | 0.925 | 1.117 |
| 95474_at   | 0.354 | 1.337 | 1.257 | 1.099 | 1.369 |
| 95477_at   | 0.492 | 1.104 | 1.131 | 0.999 | 1.162 |
| 95478_at   | 0.231 | 1.038 | 1.057 | 0.936 | 1.014 |
| 95479_at   | 0.277 | 1.076 | 0.995 | 0.948 | 1.157 |
| 95480_at   | 0.275 | 1.083 | 1.179 | 1.004 | 1.157 |
| 95481_at   | 0.405 | 0.999 | 0.948 | 1.030 | 0.991 |
| 95482_at   | 0.074 | 1.235 | 1.223 | 0.998 | 1.158 |
| 95483_at   | 0.182 | 1.017 | 0.974 | 0.975 | 0.878 |
| 95485_at   | 0.387 | 1.020 | 1.074 | 1.171 | 1.066 |
| 95486_at   | 0.438 | 0.979 | 0.992 | 0.931 | 1.009 |
| 95488_at   | 0.312 | 1.210 | 1.172 | 1.042 | 1.207 |
| 95489_at   | 0.401 | 1.173 | 1.209 | 1.041 | 1.088 |
| 95490_at   | 0.241 | 1.138 | 1.159 | 1.014 | 1.077 |
| 95491_at   | 0.304 | 1.175 | 1.254 | 1.014 | 1.202 |
| 95493_at   | 0.239 | 1.116 | 1.450 | 1.165 | 1.193 |
| 95496_at   | 0.293 | 1.151 | 1.094 | 1.030 | 1.137 |
| 95497_at   | 0.163 | 0.891 | 0.949 | 0.917 | 0.992 |
| 95498_at   | 0.424 | 1.007 | 1.087 | 1.040 | 1.026 |
| 95501_at   | 0.472 | 1.124 | 1.160 | 1.080 | 1.170 |
| 95502_at   | 0.270 | 0.883 | 0.935 | 0.979 | 0.868 |
| 95503_at   | 0.454 | 0.952 | 0.925 | 0.967 | 0.950 |
| 95505_at   | 0.367 | 1.114 | 1.057 | 0.984 | 1.050 |
| 95506_at   | 0.184 | 1.030 | 0.956 | 0.964 | 0.966 |
| 95507_at   | 0.072 | 1.107 | 1.324 | 0.979 | 1.135 |
| 95508_at   | 0.250 | 1.168 | 1.107 | 0.985 | 1.078 |
| 95509_at   | 0.461 | 0.794 | 0.802 | 0.859 | 0.791 |

|            |       |       |       |       |       |
|------------|-------|-------|-------|-------|-------|
| 95511_at   | 0.318 | 1.066 | 0.994 | 1.093 | 1.162 |
| 95512_at   | 0.310 | 1.120 | 1.022 | 1.004 | 1.104 |
| 95513_at   | 0.189 | 1.143 | 1.153 | 0.974 | 1.198 |
| 95514_at   | 0.270 | 1.037 | 1.055 | 1.009 | 0.989 |
| 95516_at   | 0.492 | 1.214 | 1.264 | 1.083 | 1.284 |
| 95517_i_at | 0.483 | 1.126 | 1.217 | 1.113 | 1.169 |
| 95518_at   | 0.250 | 1.268 | 1.160 | 1.088 | 1.189 |
| 95520_at   | 0.066 | 1.347 | 1.163 | 1.139 | 1.181 |
| 95521_s_at | 0.094 | 1.205 | 1.173 | 1.017 | 1.177 |
| 95522_i_at | 0.407 | 0.964 | 1.049 | 0.918 | 1.089 |
| 95523_at   | 0.332 | 1.111 | 1.040 | 1.190 | 1.015 |
| 95525_at   | 0.264 | 1.148 | 1.063 | 1.041 | 1.057 |
| 95526_at   | 0.397 | 1.134 | 1.150 | 1.096 | 1.084 |
| 95527_at   | 0.422 | 0.911 | 0.923 | 0.957 | 0.886 |
| 95528_at   | 0.463 | 0.829 | 0.802 | 0.881 | 0.786 |
| 95529_at   | 0.342 | 1.000 | 1.021 | 0.933 | 0.983 |
| 95530_at   | 0.322 | 1.254 | 1.387 | 1.068 | 1.308 |
| 95531_at   | 0.239 | 1.069 | 0.960 | 0.963 | 1.080 |
| 95532_at   | 0.257 | 0.874 | 0.961 | 0.879 | 0.916 |
| 95533_at   | 0.210 | 1.092 | 1.084 | 1.070 | 1.015 |
| 95536_at   | 0.322 | 1.027 | 1.056 | 1.018 | 1.038 |
| 95537_at   | 0.423 | 1.018 | 0.981 | 0.974 | 1.013 |
| 95538_at   | 0.309 | 0.937 | 0.862 | 0.954 | 0.911 |
| 95539_at   | 0.256 | 1.099 | 0.994 | 1.073 | 1.099 |
| 95540_r_at | 0.454 | 0.848 | 0.795 | 0.899 | 0.829 |
| 95541_at   | 0.318 | 1.011 | 1.044 | 1.032 | 1.166 |
| 95542_at   | 0.502 | 1.010 | 1.020 | 1.015 | 1.016 |
| 95543_at   | 0.270 | 0.714 | 0.900 | 0.858 | 0.964 |
| 95544_at   | 0.360 | 1.085 | 1.062 | 1.059 | 1.016 |
| 95545_at   | 0.308 | 0.910 | 0.969 | 0.984 | 0.877 |
| 95546_g_at | 0.058 | 0.925 | 1.574 | 1.061 | 1.120 |
| 95547_at   | 0.327 | 0.939 | 0.876 | 0.959 | 0.934 |
| 95549_at   | 0.133 | 0.879 | 0.971 | 0.881 | 0.937 |
| 95550_at   | 0.486 | 1.219 | 1.194 | 1.148 | 1.174 |
| 95551_at   | 0.302 | 0.915 | 0.938 | 0.976 | 0.933 |
| 95552_at   | 0.342 | 0.918 | 0.969 | 0.958 | 0.912 |
| 95553_at   | 0.483 | 0.790 | 0.776 | 0.858 | 0.773 |
| 95554_at   | 0.443 | 0.805 | 0.764 | 0.831 | 0.807 |
| 95555_at   | 0.170 | 0.969 | 0.969 | 1.022 | 1.059 |
| 95556_at   | 0.220 | 0.937 | 1.013 | 1.056 | 0.971 |
| 95557_at   | 0.369 | 0.973 | 0.919 | 0.973 | 0.967 |
| 95559_at   | 0.222 | 0.968 | 0.844 | 0.996 | 0.935 |
| 95561_at   | 0.167 | 0.903 | 0.928 | 0.909 | 0.952 |
| 95562_at   | 0.382 | 0.895 | 0.879 | 0.957 | 0.917 |
| 95563_at   | 0.224 | 0.918 | 1.006 | 1.020 | 1.079 |
| 95564_at   | 0.440 | 1.153 | 1.175 | 1.110 | 1.247 |
| 95565_at   | 0.381 | 1.078 | 1.122 | 1.043 | 1.157 |

|            |       |       |       |       |       |
|------------|-------|-------|-------|-------|-------|
| 95566_at   | 0.461 | 0.968 | 0.940 | 0.949 | 0.938 |
| 95567_at   | 0.470 | 0.958 | 0.947 | 0.956 | 0.987 |
| 95568_at   | 0.232 | 1.186 | 1.101 | 0.981 | 1.107 |
| 95569_at   | 0.429 | 0.799 | 0.817 | 0.877 | 0.817 |
| 95571_at   | 0.165 | 1.091 | 1.022 | 0.941 | 1.022 |
| 95573_at   | 0.323 | 1.076 | 1.078 | 1.044 | 0.991 |
| 95574_f_at | 0.285 | 0.836 | 0.830 | 0.886 | 0.686 |
| 95575_r_at | 0.422 | 0.818 | 0.825 | 0.874 | 0.856 |
| 95577_at   | 0.309 | 1.237 | 1.224 | 1.098 | 1.333 |
| 95580_at   | 0.467 | 1.028 | 1.022 | 1.005 | 1.014 |
| 95584_at   | 0.158 | 0.855 | 0.909 | 0.941 | 0.931 |
| 95585_at   | 0.313 | 0.876 | 0.836 | 0.944 | 0.860 |
| 95586_at   | 0.072 | 1.344 | 1.477 | 1.060 | 1.353 |
| 95587_at   | 0.251 | 1.001 | 0.959 | 1.085 | 0.973 |
| 95588_at   | 0.285 | 0.967 | 0.911 | 0.964 | 0.951 |
| 95590_at   | 0.035 | 1.025 | 1.081 | 0.995 | 1.228 |
| 95591_at   | 0.277 | 1.136 | 1.038 | 1.071 | 1.028 |
| 95592_at   | 0.264 | 0.918 | 1.011 | 0.929 | 1.026 |
| 95593_at   | 0.204 | 0.962 | 1.082 | 1.040 | 1.056 |
| 95594_at   | 0.436 | 1.204 | 1.180 | 1.061 | 1.193 |
| 95595_at   | 0.207 | 0.906 | 0.877 | 0.905 | 0.949 |
| 95596_at   | 0.350 | 0.984 | 0.966 | 1.009 | 0.930 |
| 95597_at   | 0.243 | 1.294 | 1.342 | 1.103 | 1.401 |
| 95599_at   | 0.050 | 1.100 | 1.441 | 1.029 | 1.082 |
| 95600_at   | 0.376 | 0.947 | 1.000 | 0.982 | 0.996 |
| 95601_at   | 0.399 | 0.919 | 0.979 | 0.998 | 0.999 |
| 95602_at   | 0.251 | 1.060 | 1.018 | 0.992 | 1.033 |
| 95603_at   | 0.452 | 0.934 | 0.899 | 0.943 | 0.938 |
| 95604_at   | 0.315 | 1.023 | 1.008 | 0.961 | 0.923 |
| 95606_at   | 0.247 | 0.991 | 0.993 | 0.986 | 1.060 |
| 95607_at   | 0.196 | 1.021 | 1.087 | 1.001 | 1.049 |
| 95608_at   | 0.136 | 1.080 | 1.418 | 1.068 | 1.305 |
| 95609_at   | 0.301 | 1.271 | 1.221 | 1.121 | 1.189 |
| 95610_at   | 0.183 | 0.964 | 0.984 | 0.932 | 1.051 |
| 95611_at   | 0.308 | 1.207 | 1.173 | 1.330 | 1.447 |
| 95612_at   | 0.125 | 0.963 | 1.041 | 0.983 | 1.046 |
| 95613_at   | 0.104 | 1.057 | 1.139 | 0.915 | 1.259 |
| 95614_at   | 0.337 | 1.228 | 1.168 | 1.059 | 1.183 |
| 95616_at   | 0.496 | 1.068 | 1.068 | 1.062 | 1.106 |
| 95617_at   | 0.408 | 1.108 | 1.066 | 1.050 | 1.085 |
| 95618_at   | 0.345 | 1.089 | 1.279 | 1.065 | 1.148 |
| 95619_at   | 0.317 | 1.095 | 1.155 | 1.055 | 1.210 |
| 95620_at   | 0.355 | 1.092 | 1.057 | 1.174 | 1.121 |
| 95621_at   | 0.285 | 0.948 | 0.867 | 0.964 | 0.896 |
| 95622_at   | 0.323 | 1.201 | 1.200 | 1.137 | 1.077 |
| 95625_at   | 0.368 | 1.156 | 1.031 | 1.126 | 1.117 |
| 95626_at   | 0.139 | 1.048 | 0.885 | 1.011 | 0.974 |

|            |       |       |       |       |       |
|------------|-------|-------|-------|-------|-------|
| 95627_at   | 0.291 | 0.989 | 0.986 | 0.898 | 1.126 |
| 95628_at   | 0.387 | 0.906 | 0.898 | 0.946 | 0.927 |
| 95629_at   | 0.182 | 1.061 | 1.274 | 1.044 | 1.258 |
| 95630_at   | 0.449 | 0.936 | 0.927 | 0.991 | 0.916 |
| 95631_at   | 0.105 | 1.099 | 1.168 | 1.002 | 1.089 |
| 95632_f_at | 0.252 | 0.920 | 0.845 | 0.888 | 0.865 |
| 95633_r_at | 0.354 | 0.853 | 0.846 | 0.941 | 0.855 |
| 95634_at   | 0.409 | 0.975 | 1.086 | 1.024 | 1.080 |
| 95635_g_at | 0.478 | 0.958 | 0.939 | 0.963 | 0.953 |
| 95636_at   | 0.339 | 1.040 | 1.027 | 0.971 | 1.072 |
| 95637_at   | 0.117 | 1.152 | 1.035 | 1.176 | 1.002 |
| 95639_at   | 0.392 | 0.898 | 0.857 | 0.914 | 0.886 |
| 95641_at   | 0.401 | 0.992 | 0.937 | 0.972 | 0.940 |
| 95642_at   | 0.163 | 0.915 | 0.820 | 0.864 | 0.935 |
| 95643_at   | 0.155 | 1.248 | 1.195 | 1.096 | 1.144 |
| 95645_at   | 0.477 | 0.876 | 0.870 | 0.921 | 0.882 |
| 95646_at   | 0.297 | 1.007 | 0.952 | 1.322 | 0.990 |
| 95647_f_at | 0.293 | 1.265 | 1.280 | 1.066 | 1.307 |
| 95648_at   | 0.452 | 1.042 | 1.098 | 1.029 | 1.058 |
| 95649_at   | 0.181 | 1.009 | 1.074 | 0.953 | 1.077 |
| 95650_at   | 0.309 | 0.946 | 0.968 | 0.943 | 0.980 |
| 95651_at   | 0.477 | 1.011 | 1.006 | 0.982 | 1.009 |
| 95652_at   | 0.490 | 1.021 | 1.039 | 0.988 | 1.040 |
| 95653_at   | 0.484 | 1.062 | 1.052 | 1.050 | 1.065 |
| 95654_at   | 0.161 | 1.070 | 1.241 | 0.955 | 1.188 |
| 95655_at   | 0.356 | 0.984 | 1.043 | 0.995 | 1.145 |
| 95656_i_at | 0.332 | 0.893 | 0.950 | 0.965 | 0.970 |
| 95657_f_at | 0.336 | 1.238 | 1.291 | 1.076 | 1.270 |
| 95658_at   | 0.379 | 0.965 | 1.053 | 0.900 | 0.940 |
| 95659_at   | 0.143 | 1.077 | 1.278 | 0.953 | 1.141 |
| 95660_at   | 0.219 | 0.921 | 1.096 | 0.956 | 0.970 |
| 95661_at   | 0.066 | 1.104 | 1.171 | 0.949 | 1.079 |
| 95662_at   | 0.444 | 1.148 | 1.171 | 1.051 | 1.205 |
| 95663_at   | 0.388 | 0.869 | 0.833 | 0.912 | 0.885 |
| 95664_at   | 0.066 | 0.880 | 1.064 | 1.142 | 0.977 |
| 95665_at   | 0.209 | 1.244 | 1.270 | 1.224 | 1.082 |
| 95666_at   | 0.267 | 1.119 | 1.065 | 1.008 | 1.087 |
| 95668_at   | 0.322 | 1.012 | 0.946 | 0.930 | 0.950 |
| 95669_g_at | 0.046 | 0.955 | 0.841 | 1.035 | 1.034 |
| 95670_at   | 0.200 | 1.168 | 1.016 | 1.059 | 1.229 |
| 95671_at   | 0.197 | 1.063 | 0.907 | 0.974 | 1.023 |
| 95672_at   | 0.472 | 0.901 | 0.865 | 0.908 | 0.896 |
| 95673_s_at | 0.184 | 0.915 | 1.087 | 0.910 | 0.818 |
| 95674_r_at | 0.207 | 0.897 | 0.873 | 0.951 | 0.853 |
| 95675_at   | 0.244 | 1.196 | 1.100 | 1.050 | 1.192 |
| 95676_at   | 0.424 | 0.857 | 0.814 | 0.913 | 0.879 |
| 95677_at   | 0.236 | 1.042 | 1.152 | 0.947 | 1.036 |

|            |       |       |       |       |       |
|------------|-------|-------|-------|-------|-------|
| 95679_at   | 0.324 | 0.874 | 0.941 | 0.854 | 0.893 |
| 95680_at   | 0.253 | 1.063 | 1.033 | 1.002 | 1.128 |
| 95681_f_at | 0.107 | 0.995 | 1.043 | 0.996 | 1.129 |
| 95682_at   | 0.228 | 1.183 | 1.114 | 1.049 | 1.124 |
| 95683_g_at | 0.287 | 1.298 | 1.295 | 1.175 | 1.198 |
| 95684_at   | 0.273 | 0.984 | 0.914 | 0.958 | 0.917 |
| 95685_at   | 0.465 | 0.913 | 0.931 | 0.930 | 0.916 |
| 95686_at   | 0.274 | 1.068 | 1.070 | 0.966 | 1.040 |
| 95688_at   | 0.344 | 1.226 | 1.226 | 1.071 | 1.228 |
| 95689_at   | 0.181 | 0.996 | 0.902 | 1.021 | 0.942 |
| 95690_at   | 0.440 | 1.134 | 1.198 | 1.091 | 1.103 |
| 95692_at   | 0.441 | 1.073 | 1.102 | 1.012 | 1.111 |
| 95693_at   | 0.358 | 1.088 | 1.078 | 1.053 | 1.127 |
| 95694_at   | 0.188 | 1.219 | 1.155 | 1.012 | 1.094 |
| 95695_at   | 0.384 | 0.996 | 1.073 | 1.079 | 1.156 |
| 95696_at   | 0.472 | 1.163 | 1.193 | 1.101 | 1.153 |
| 95697_at   | 0.381 | 0.989 | 0.878 | 0.987 | 0.934 |
| 95698_at   | 0.298 | 1.057 | 1.121 | 0.973 | 1.099 |
| 95699_f_at | 0.172 | 1.134 | 1.129 | 0.943 | 1.204 |
| 95700_r_at | 0.364 | 0.993 | 0.951 | 0.990 | 1.008 |
| 95701_at   | 0.113 | 0.996 | 0.846 | 1.026 | 0.820 |
| 95702_at   | 0.323 | 1.195 | 1.205 | 1.092 | 1.165 |
| 95703_at   | 0.245 | 1.248 | 1.295 | 1.089 | 1.233 |
| 95704_at   | 0.338 | 0.976 | 1.005 | 1.002 | 0.987 |
| 95705_s_at | 0.371 | 0.343 | 0.251 | 0.464 | 0.293 |
| 95706_at   | 0.219 | 1.199 | 1.557 | 1.190 | 1.658 |
| 95707_at   | 0.308 | 1.064 | 1.141 | 1.003 | 1.084 |
| 95708_at   | 0.058 | 1.120 | 1.354 | 1.024 | 1.089 |
| 95709_at   | 0.308 | 1.082 | 1.130 | 0.997 | 1.065 |
| 95712_at   | 0.231 | 1.061 | 1.069 | 0.998 | 1.101 |
| 95713_at   | 0.371 | 1.154 | 1.113 | 1.113 | 1.085 |
| 95714_at   | 0.183 | 1.089 | 1.187 | 0.946 | 1.200 |
| 95715_at   | 0.104 | 1.067 | 1.188 | 0.969 | 1.137 |
| 95716_at   | 0.366 | 1.299 | 1.284 | 1.213 | 1.211 |
| 95717_at   | 0.438 | 1.052 | 1.003 | 0.995 | 1.042 |
| 95718_f_at | 0.441 | 1.009 | 1.078 | 1.043 | 1.018 |
| 95719_at   | 0.505 | 0.904 | 0.892 | 0.918 | 0.897 |
| 95721_at   | 0.348 | 1.091 | 1.093 | 1.107 | 1.065 |
| 95722_at   | 0.071 | 0.986 | 1.241 | 1.016 | 1.148 |
| 95723_r_at | 0.041 | 1.002 | 0.942 | 1.084 | 0.874 |
| 95725_at   | 0.458 | 0.918 | 0.887 | 0.975 | 0.902 |
| 95726_at   | 0.349 | 1.061 | 1.106 | 1.101 | 1.051 |
| 95727_at   | 0.227 | 0.909 | 0.882 | 0.984 | 0.930 |
| 95728_g_at | 0.289 | 0.851 | 0.816 | 0.922 | 0.844 |
| 95729_at   | 0.204 | 0.843 | 0.911 | 0.900 | 0.849 |
| 95730_at   | 0.339 | 1.080 | 1.179 | 1.065 | 1.225 |
| 95731_at   | 0.422 | 1.121 | 1.070 | 1.047 | 1.185 |

|            |       |       |       |       |       |
|------------|-------|-------|-------|-------|-------|
| 95732_at   | 0.158 | 1.111 | 1.157 | 0.963 | 1.135 |
| 95733_at   | 0.303 | 0.947 | 0.873 | 0.938 | 0.913 |
| 95734_at   | 0.363 | 0.908 | 0.866 | 0.917 | 0.937 |
| 95735_at   | 0.240 | 0.957 | 1.002 | 0.952 | 0.936 |
| 95736_at   | 0.456 | 0.982 | 1.048 | 1.033 | 1.033 |
| 95737_at   | 0.420 | 1.170 | 1.130 | 1.072 | 1.138 |
| 95738_at   | 0.394 | 0.961 | 1.002 | 0.978 | 0.953 |
| 95739_at   | 0.279 | 0.864 | 0.887 | 0.931 | 0.920 |
| 95740_at   | 0.330 | 0.853 | 0.792 | 1.020 | 0.834 |
| 95742_at   | 0.046 | 1.132 | 1.224 | 0.970 | 1.141 |
| 95743_at   | 0.375 | 1.278 | 1.268 | 1.222 | 1.256 |
| 95744_at   | 0.425 | 0.856 | 0.864 | 0.919 | 0.870 |
| 95745_g_at | 0.480 | 1.085 | 1.064 | 1.032 | 1.092 |
| 95746_at   | 0.483 | 1.338 | 1.329 | 1.243 | 1.328 |
| 95747_at   | 0.262 | 0.989 | 0.968 | 1.046 | 1.020 |
| 95749_at   | 0.322 | 0.905 | 1.068 | 0.875 | 0.839 |
| 95750_at   | 0.117 | 0.959 | 0.904 | 0.982 | 0.992 |
| 95752_at   | 0.093 | 1.063 | 1.008 | 0.959 | 1.075 |
| 95753_at   | 0.072 | 0.942 | 1.036 | 0.913 | 1.085 |
| 95754_at   | 0.293 | 0.988 | 0.957 | 0.987 | 1.019 |
| 95755_at   | 0.401 | 1.045 | 1.070 | 1.071 | 1.036 |
| 95756_at   | 0.216 | 1.081 | 0.974 | 1.045 | 1.053 |
| 95758_at   | 0.202 | 1.281 | 1.215 | 1.234 | 1.160 |
| 95759_at   | 0.285 | 1.115 | 1.151 | 1.050 | 1.097 |
| 95760_at   | 0.241 | 1.197 | 1.165 | 1.115 | 1.088 |
| 95765_at   | 0.362 | 1.033 | 0.999 | 1.033 | 1.032 |
| 95766_f_at | 0.351 | 0.829 | 0.756 | 0.874 | 0.793 |
| 95770_s_at | 0.273 | 1.016 | 0.922 | 1.032 | 0.948 |
| 95771_i_at | 0.357 | 0.934 | 0.998 | 1.019 | 0.949 |
| 95772_r_at | 0.276 | 1.015 | 1.029 | 1.059 | 1.085 |
| 95773_at   | 0.445 | 0.855 | 0.807 | 0.868 | 0.843 |
| 95775_f_at | 0.340 | 0.911 | 0.960 | 0.927 | 0.889 |
| 95781_at   | 0.452 | 0.815 | 0.804 | 0.854 | 0.853 |
| 95782_at   | 0.406 | 0.858 | 0.771 | 0.920 | 0.808 |
| 95783_g_at | 0.502 | 0.900 | 0.863 | 0.911 | 0.858 |
| 95784_at   | 0.171 | 1.094 | 1.132 | 1.109 | 1.377 |
| 95785_s_at | 0.288 | 0.687 | 0.966 | 0.971 | 0.989 |
| 95786_at   | 0.495 | 0.879 | 0.847 | 0.888 | 0.876 |
| 95787_s_at | 0.308 | 1.003 | 1.142 | 1.031 | 1.185 |
| 95791_s_at | 0.478 | 1.071 | 1.201 | 1.020 | 1.189 |
| 95792_at   | 0.421 | 0.939 | 0.939 | 0.957 | 0.903 |
| 95793_at   | 0.378 | 0.919 | 0.883 | 0.978 | 0.899 |
| 95794_f_at | 0.107 | 0.874 | 0.997 | 0.970 | 0.836 |
| 95795_at   | 0.219 | 0.999 | 1.095 | 0.918 | 1.207 |
| 95796_g_at | 0.051 | 0.946 | 1.053 | 0.867 | 1.151 |
| 95797_f_at | 0.402 | 0.900 | 0.842 | 0.904 | 0.889 |
| 95798_f_at | 0.364 | 0.893 | 0.839 | 0.908 | 0.896 |



|            |       |       |       |       |       |
|------------|-------|-------|-------|-------|-------|
| 95799_s_at | 0.391 | 0.807 | 0.784 | 0.900 | 0.765 |
| 95800_s_at | 0.274 | 0.807 | 0.845 | 0.896 | 0.912 |
| 95801_s_at | 0.137 | 0.899 | 0.952 | 0.951 | 1.107 |
| 95803_at   | 0.144 | 0.827 | 0.997 | 0.940 | 1.054 |
| 95804_g_at | 0.142 | 0.864 | 0.986 | 0.930 | 1.044 |
| 95805_at   | 0.428 | 0.937 | 0.874 | 0.931 | 0.904 |
| 95806_f_at | 0.204 | 0.912 | 0.883 | 1.038 | 0.942 |
| 95807_at   | 0.271 | 0.880 | 0.870 | 0.969 | 0.871 |
| 95808_g_at | 0.272 | 0.776 | 0.896 | 0.848 | 0.814 |
| 95848_at   | 0.307 | 0.845 | 0.910 | 0.911 | 1.032 |
| 95852_at   | 0.403 | 0.902 | 0.869 | 0.909 | 0.898 |
| 95853_at   | 0.368 | 0.899 | 0.849 | 0.878 | 0.835 |
| 95854_at   | 0.306 | 0.929 | 0.963 | 0.981 | 0.933 |
| 95855_at   | 0.380 | 0.896 | 0.846 | 0.915 | 0.876 |
| 95856_at   | 0.406 | 0.902 | 0.890 | 0.939 | 0.879 |
| 95857_at   | 0.461 | 0.824 | 0.794 | 0.894 | 0.828 |
| 95858_at   | 0.400 | 0.933 | 0.907 | 0.947 | 0.951 |
| 95861_at   | 0.388 | 0.776 | 0.748 | 0.836 | 0.789 |
| 95862_at   | 0.315 | 0.932 | 0.854 | 0.954 | 0.909 |
| 95863_at   | 0.384 | 0.844 | 0.796 | 0.888 | 0.807 |
| 95864_at   | 0.328 | 0.974 | 0.890 | 0.956 | 0.972 |
| 95869_at   | 0.243 | 0.961 | 1.006 | 0.957 | 1.007 |
| 95870_at   | 0.490 | 0.890 | 0.868 | 0.912 | 0.896 |
| 95871_at   | 0.309 | 0.911 | 0.854 | 0.904 | 0.881 |
| 95872_at   | 0.467 | 0.914 | 0.849 | 0.873 | 0.864 |
| 95875_at   | 0.327 | 0.921 | 0.849 | 0.975 | 0.901 |
| 95876_at   | 0.251 | 0.860 | 0.826 | 0.950 | 0.847 |
| 95877_at   | 0.346 | 0.855 | 0.842 | 0.894 | 0.870 |
| 95878_at   | 0.398 | 0.980 | 0.950 | 0.956 | 0.935 |
| 95879_at   | 0.255 | 1.069 | 1.028 | 0.984 | 1.059 |
| 95880_s_at | 0.445 | 0.944 | 0.922 | 0.973 | 0.949 |
| 95881_f_at | 0.331 | 0.945 | 1.003 | 1.010 | 1.059 |
| 95882_at   | 0.499 | 0.904 | 0.898 | 0.932 | 0.910 |
| 95883_at   | 0.108 | 0.905 | 0.873 | 0.954 | 0.976 |
| 95884_at   | 0.444 | 0.912 | 0.890 | 0.949 | 0.887 |
| 95885_at   | 0.196 | 1.071 | 1.081 | 1.005 | 1.209 |
| 95886_g_at | 0.159 | 1.246 | 1.050 | 1.058 | 1.058 |
| 95887_at   | 0.250 | 1.042 | 1.029 | 1.025 | 1.178 |
| 95888_at   | 0.392 | 1.029 | 1.055 | 1.097 | 1.102 |
| 95889_at   | 0.308 | 0.999 | 0.944 | 1.014 | 1.023 |
| 95890_r_at | 0.246 | 0.981 | 1.019 | 0.928 | 0.909 |
| 95891_at   | 0.368 | 0.926 | 0.919 | 0.940 | 0.940 |
| 95892_at   | 0.180 | 0.967 | 0.900 | 0.991 | 0.882 |
| 95893_at   | 0.084 | 0.831 | 1.053 | 0.802 | 0.847 |
| 95894_at   | 0.323 | 0.951 | 0.971 | 0.985 | 0.957 |
| 95895_at   | 0.370 | 0.893 | 0.908 | 0.927 | 0.866 |
| 95896_at   | 0.251 | 1.082 | 1.036 | 0.950 | 1.100 |

|            |       |       |       |       |       |
|------------|-------|-------|-------|-------|-------|
| 95897_at   | 0.454 | 1.162 | 1.165 | 1.029 | 1.186 |
| 95898_at   | 0.369 | 0.826 | 0.766 | 0.871 | 0.759 |
| 95901_f_at | 0.445 | 0.904 | 0.876 | 0.952 | 0.914 |
| 95902_at   | 0.232 | 0.963 | 0.909 | 1.015 | 0.909 |
| 95903_at   | 0.227 | 0.992 | 0.902 | 1.031 | 0.957 |
| 95904_at   | 0.350 | 0.901 | 0.860 | 0.919 | 0.861 |
| 95905_at   | 0.438 | 0.812 | 0.798 | 0.873 | 0.834 |
| 95906_at   | 0.492 | 0.940 | 0.911 | 0.949 | 0.898 |
| 95907_at   | 0.175 | 0.921 | 0.909 | 0.920 | 1.006 |
| 95908_at   | 0.402 | 0.869 | 0.825 | 0.897 | 0.856 |
| 95909_at   | 0.432 | 0.849 | 0.842 | 0.917 | 0.873 |
| 95910_f_at | 0.459 | 1.092 | 1.020 | 1.083 | 1.097 |
| 95911_at   | 0.347 | 0.977 | 1.045 | 0.952 | 0.979 |
| 95912_at   | 0.209 | 0.839 | 0.939 | 0.973 | 0.895 |
| 95913_at   | 0.134 | 0.982 | 0.969 | 0.927 | 0.913 |
| 95914_at   | 0.492 | 1.019 | 1.006 | 0.966 | 1.021 |
| 95915_at   | 0.205 | 0.786 | 0.820 | 0.901 | 0.896 |
| 95916_at   | 0.456 | 0.922 | 0.843 | 0.926 | 0.877 |
| 95917_at   | 0.130 | 1.073 | 0.968 | 0.995 | 0.981 |
| 95919_at   | 0.494 | 0.791 | 0.774 | 0.871 | 0.765 |
| 95920_at   | 0.483 | 0.882 | 0.831 | 0.884 | 0.850 |
| 95923_at   | 0.318 | 1.014 | 1.009 | 0.996 | 1.033 |
| 95924_at   | 0.228 | 0.964 | 1.029 | 0.989 | 0.994 |
| 95925_at   | 0.449 | 0.882 | 0.879 | 0.966 | 0.886 |
| 95926_at   | 0.074 | 0.877 | 0.837 | 1.015 | 0.930 |
| 95927_f_at | 0.200 | 1.052 | 0.976 | 0.925 | 1.067 |
| 95929_at   | 0.434 | 0.877 | 0.830 | 0.926 | 0.839 |
| 95930_at   | 0.327 | 0.996 | 0.921 | 0.998 | 0.962 |
| 95931_at   | 0.150 | 1.035 | 0.944 | 1.016 | 1.056 |
| 95932_at   | 0.415 | 0.872 | 0.842 | 0.928 | 0.836 |
| 95933_f_at | 0.150 | 0.905 | 0.836 | 0.900 | 0.916 |
| 95934_at   | 0.440 | 0.975 | 0.984 | 1.009 | 0.994 |
| 95935_at   | 0.292 | 0.932 | 0.918 | 1.049 | 0.937 |
| 95936_at   | 0.260 | 0.872 | 0.866 | 0.933 | 1.099 |
| 95937_at   | 0.406 | 0.918 | 0.892 | 0.957 | 0.914 |
| 95938_at   | 0.404 | 0.886 | 0.840 | 0.908 | 0.872 |
| 95939_i_at | 0.478 | 0.900 | 0.905 | 0.922 | 0.859 |
| 95940_f_at | 0.322 | 1.334 | 1.476 | 1.072 | 1.603 |
| 95941_at   | 0.310 | 0.872 | 0.926 | 0.918 | 0.892 |
| 95943_at   | 0.496 | 0.794 | 0.785 | 0.819 | 0.746 |
| 95944_at   | 0.120 | 1.075 | 1.042 | 0.834 | 1.229 |
| 95945_at   | 0.375 | 0.897 | 0.873 | 0.952 | 0.865 |
| 95946_at   | 0.508 | 0.880 | 0.862 | 0.902 | 0.868 |
| 95947_at   | 0.370 | 0.959 | 0.939 | 0.941 | 0.960 |
| 95948_at   | 0.286 | 0.978 | 0.911 | 1.027 | 1.008 |
| 95949_at   | 0.369 | 0.794 | 0.766 | 0.842 | 0.820 |
| 95950_at   | 0.364 | 0.906 | 0.940 | 0.958 | 0.951 |

|            |       |       |       |       |       |
|------------|-------|-------|-------|-------|-------|
| 95951_at   | 0.120 | 0.929 | 0.846 | 0.927 | 1.100 |
| 95952_at   | 0.235 | 0.842 | 0.773 | 0.912 | 0.835 |
| 95953_at   | 0.434 | 0.862 | 0.827 | 0.912 | 0.846 |
| 95954_at   | 0.375 | 0.901 | 0.851 | 0.979 | 0.884 |
| 95955_at   | 0.189 | 0.998 | 0.929 | 1.021 | 0.946 |
| 95956_at   | 0.475 | 0.951 | 0.952 | 0.997 | 0.935 |
| 95957_at   | 0.400 | 0.952 | 0.948 | 0.946 | 0.960 |
| 95958_at   | 0.496 | 0.929 | 0.907 | 0.975 | 0.912 |
| 95959_at   | 0.393 | 0.805 | 0.786 | 0.884 | 0.830 |
| 95960_at   | 0.318 | 0.980 | 0.889 | 1.018 | 0.954 |
| 95961_at   | 0.359 | 1.018 | 0.991 | 0.983 | 0.958 |
| 95962_at   | 0.290 | 0.919 | 0.860 | 0.995 | 0.931 |
| 95963_at   | 0.178 | 0.888 | 0.876 | 0.881 | 0.950 |
| 95964_at   | 0.340 | 0.964 | 0.937 | 0.956 | 0.992 |
| 95965_at   | 0.405 | 0.910 | 0.856 | 0.877 | 0.888 |
| 95966_at   | 0.167 | 0.925 | 0.875 | 0.974 | 0.936 |
| 95967_at   | 0.323 | 0.858 | 0.830 | 0.920 | 0.889 |
| 95968_at   | 0.502 | 0.955 | 0.943 | 0.974 | 0.959 |
| 95970_at   | 0.263 | 0.860 | 0.886 | 0.852 | 0.794 |
| 95971_at   | 0.378 | 0.892 | 0.832 | 0.937 | 0.916 |
| 95972_at   | 0.298 | 0.871 | 0.815 | 0.952 | 0.811 |
| 95973_at   | 0.494 | 0.924 | 0.928 | 0.923 | 0.912 |
| 95974_at   | 0.323 | 1.141 | 1.237 | 1.040 | 1.164 |
| 95975_at   | 0.508 | 1.006 | 0.995 | 1.020 | 0.980 |
| 95976_at   | 0.048 | 0.922 | 0.908 | 1.059 | 0.911 |
| 95977_at   | 0.458 | 0.955 | 0.913 | 0.945 | 0.934 |
| 95978_at   | 0.342 | 1.083 | 1.055 | 1.138 | 1.103 |
| 95979_at   | 0.390 | 0.901 | 0.836 | 0.927 | 0.905 |
| 95980_at   | 0.379 | 0.981 | 0.953 | 1.035 | 0.946 |
| 95981_at   | 0.477 | 0.883 | 0.838 | 0.894 | 0.879 |
| 95982_at   | 0.340 | 0.916 | 0.877 | 0.994 | 0.908 |
| 95983_at   | 0.505 | 0.909 | 0.884 | 0.925 | 0.872 |
| 95984_at   | 0.465 | 1.065 | 1.036 | 0.998 | 1.070 |
| 95985_at   | 0.334 | 0.850 | 0.893 | 0.915 | 0.893 |
| 95986_at   | 0.209 | 0.811 | 0.736 | 0.888 | 0.831 |
| 95987_at   | 0.445 | 0.911 | 0.851 | 0.947 | 0.891 |
| 95988_r_at | 0.235 | 0.904 | 0.892 | 0.953 | 0.906 |
| 95989_at   | 0.322 | 0.929 | 0.867 | 0.950 | 0.928 |
| 95990_at   | 0.499 | 0.815 | 0.812 | 0.850 | 0.804 |
| 95991_at   | 0.064 | 0.920 | 0.814 | 0.906 | 0.925 |
| 95992_at   | 0.151 | 0.956 | 0.894 | 0.982 | 0.931 |
| 95994_at   | 0.193 | 0.866 | 0.828 | 0.966 | 0.873 |
| 95995_at   | 0.403 | 0.851 | 0.785 | 0.843 | 0.806 |
| 95996_at   | 0.404 | 0.930 | 0.876 | 0.912 | 0.877 |
| 95997_at   | 0.314 | 0.820 | 0.722 | 0.889 | 0.821 |
| 95998_at   | 0.434 | 0.848 | 0.846 | 0.908 | 0.845 |
| 95999_at   | 0.251 | 0.869 | 0.842 | 0.925 | 0.850 |

|            |       |       |       |       |       |
|------------|-------|-------|-------|-------|-------|
| 96000_at   | 0.196 | 0.889 | 0.856 | 0.952 | 0.879 |
| 96001_at   | 0.281 | 0.866 | 0.830 | 0.949 | 0.847 |
| 96002_at   | 0.334 | 1.035 | 1.052 | 1.052 | 1.093 |
| 96003_at   | 0.381 | 0.989 | 0.995 | 0.936 | 0.996 |
| 96004_at   | 0.091 | 1.004 | 1.081 | 0.954 | 1.084 |
| 96007_at   | 0.090 | 1.083 | 1.289 | 1.048 | 1.098 |
| 96008_at   | 0.227 | 1.021 | 1.162 | 0.993 | 1.071 |
| 96009_s_at | 0.186 | 0.870 | 0.885 | 0.976 | 0.843 |
| 96010_at   | 0.488 | 1.201 | 1.210 | 1.110 | 1.204 |
| 96011_at   | 0.332 | 0.959 | 1.037 | 0.973 | 1.188 |
| 96012_f_at | 0.139 | 1.474 | 1.410 | 1.022 | 1.373 |
| 96013_r_at | 0.370 | 1.123 | 1.001 | 1.003 | 1.064 |
| 96014_at   | 0.233 | 1.028 | 1.009 | 1.008 | 1.073 |
| 96016_at   | 0.025 | 1.054 | 1.158 | 0.939 | 1.256 |
| 96017_at   | 0.334 | 0.953 | 0.929 | 0.968 | 1.016 |
| 96018_r_at | 0.250 | 1.108 | 1.048 | 1.126 | 1.075 |
| 96019_at   | 0.379 | 1.159 | 1.183 | 0.985 | 1.147 |
| 96020_at   | 0.035 | 1.369 | 3.883 | 1.245 | 2.043 |
| 96021_at   | 0.332 | 1.022 | 1.055 | 1.076 | 1.049 |
| 96023_at   | 0.463 | 0.975 | 1.033 | 1.005 | 1.017 |
| 96024_at   | 0.194 | 0.978 | 1.048 | 0.952 | 1.000 |
| 96025_g_at | 0.138 | 1.061 | 1.174 | 1.016 | 1.093 |
| 96026_at   | 0.304 | 0.917 | 0.912 | 0.939 | 0.844 |
| 96027_at   | 0.420 | 1.097 | 1.119 | 1.122 | 1.085 |
| 96028_at   | 0.445 | 0.917 | 0.882 | 0.982 | 0.897 |
| 96029_at   | 0.119 | 1.077 | 1.114 | 0.934 | 1.129 |
| 96030_at   | 0.481 | 0.967 | 0.925 | 0.982 | 0.913 |
| 96031_r_at | 0.350 | 0.983 | 0.938 | 0.962 | 0.992 |
| 96032_at   | 0.425 | 0.936 | 0.945 | 0.932 | 0.922 |
| 96033_at   | 0.094 | 1.030 | 0.925 | 1.065 | 1.006 |
| 96035_at   | 0.388 | 1.043 | 1.014 | 1.148 | 1.049 |
| 96036_at   | 0.448 | 1.008 | 0.951 | 1.042 | 0.995 |
| 96037_at   | 0.439 | 1.005 | 1.000 | 1.001 | 0.984 |
| 96038_at   | 0.217 | 1.209 | 1.046 | 1.194 | 1.055 |
| 96041_at   | 0.052 | 1.252 | 1.577 | 0.974 | 1.586 |
| 96042_at   | 0.136 | 1.261 | 1.352 | 1.177 | 1.129 |
| 96043_at   | 0.417 | 0.907 | 0.867 | 0.955 | 0.916 |
| 96044_at   | 0.165 | 0.870 | 0.915 | 0.940 | 0.869 |
| 96045_at   | 0.345 | 0.919 | 0.865 | 0.957 | 0.906 |
| 96046_at   | 0.102 | 0.980 | 1.010 | 0.989 | 1.048 |
| 96047_at   | 0.202 | 0.980 | 1.039 | 1.265 | 0.885 |
| 96048_at   | 0.283 | 1.029 | 0.976 | 0.983 | 1.027 |
| 96049_at   | 0.357 | 1.185 | 1.126 | 1.189 | 1.141 |
| 96050_at   | 0.134 | 1.079 | 1.036 | 0.974 | 1.027 |
| 96051_at   | 0.443 | 0.842 | 0.846 | 0.913 | 0.822 |
| 96052_at   | 0.246 | 0.989 | 0.972 | 0.960 | 1.002 |
| 96053_i_at | 0.419 | 0.839 | 0.782 | 0.901 | 0.834 |

|            |       |       |       |       |       |
|------------|-------|-------|-------|-------|-------|
| 96054_f_at | 0.251 | 0.815 | 0.834 | 0.874 | 0.908 |
| 96055_at   | 0.502 | 0.899 | 0.866 | 0.911 | 0.877 |
| 96056_at   | 0.441 | 1.006 | 1.029 | 0.976 | 1.059 |
| 96057_at   | 0.174 | 1.017 | 0.939 | 1.001 | 1.001 |
| 96058_s_at | 0.108 | 1.116 | 0.993 | 1.032 | 1.027 |
| 96059_at   | 0.250 | 1.148 | 1.197 | 1.005 | 1.213 |
| 96060_at   | 0.184 | 1.355 | 1.323 | 1.057 | 1.390 |
| 96061_at   | 0.424 | 1.169 | 1.121 | 1.017 | 1.142 |
| 96063_at   | 0.093 | 1.030 | 1.127 | 1.002 | 1.146 |
| 96064_at   | 0.238 | 0.373 | 0.900 | 0.595 | 0.368 |
| 96065_at   | 0.422 | 1.141 | 1.219 | 1.062 | 1.216 |
| 96066_s_at | 0.275 | 1.144 | 1.162 | 1.191 | 1.105 |
| 96068_at   | 0.505 | 1.039 | 1.035 | 1.011 | 1.039 |
| 96069_at   | 0.189 | 0.967 | 0.924 | 1.035 | 0.912 |
| 96070_at   | 0.342 | 0.950 | 1.014 | 1.014 | 0.952 |
| 96071_at   | 0.125 | 0.982 | 1.014 | 0.949 | 1.059 |
| 96072_at   | 0.244 | 1.110 | 1.271 | 1.163 | 1.077 |
| 96073_at   | 0.201 | 1.002 | 0.937 | 0.994 | 0.976 |
| 96074_at   | 0.257 | 0.924 | 0.886 | 1.006 | 0.860 |
| 96075_at   | 0.070 | 1.198 | 1.309 | 1.055 | 1.155 |
| 96076_at   | 0.188 | 1.071 | 1.102 | 0.972 | 1.004 |
| 96077_at   | 0.196 | 0.928 | 0.910 | 0.997 | 0.925 |
| 96078_g_at | 0.467 | 0.904 | 0.881 | 0.958 | 0.884 |
| 96079_at   | 0.472 | 1.109 | 1.131 | 1.081 | 1.224 |
| 96081_at   | 0.209 | 0.916 | 0.997 | 0.944 | 1.020 |
| 96082_at   | 0.222 | 0.925 | 0.940 | 1.022 | 0.979 |
| 96083_s_at | 0.226 | 1.432 | 1.555 | 1.054 | 1.452 |
| 96084_at   | 0.337 | 1.132 | 1.135 | 1.032 | 1.197 |
| 96085_at   | 0.175 | 1.216 | 1.038 | 1.150 | 0.989 |
| 96086_at   | 0.502 | 1.016 | 1.027 | 1.027 | 1.038 |
| 96087_at   | 0.388 | 1.026 | 1.021 | 0.977 | 1.018 |
| 96088_at   | 0.241 | 1.111 | 0.902 | 1.125 | 1.007 |
| 96089_at   | 0.465 | 1.102 | 1.073 | 1.147 | 1.090 |
| 96090_g_at | 0.354 | 1.237 | 1.153 | 1.277 | 1.137 |
| 96091_at   | 0.331 | 0.772 | 0.730 | 0.918 | 0.744 |
| 96092_at   | 0.094 | 1.195 | 1.010 | 1.055 | 1.126 |
| 96093_at   | 0.291 | 0.990 | 1.042 | 0.979 | 0.995 |
| 96094_at   | 0.337 | 0.843 | 0.838 | 1.009 | 0.828 |
| 96095_i_at | 0.137 | 0.838 | 0.894 | 0.994 | 0.978 |
| 96096_f_at | 0.239 | 1.120 | 1.052 | 1.113 | 1.140 |
| 96097_at   | 0.334 | 0.983 | 0.964 | 0.969 | 0.937 |
| 96098_at   | 0.422 | 0.985 | 1.006 | 0.999 | 1.040 |
| 96099_at   | 0.376 | 0.901 | 0.860 | 0.945 | 0.894 |
| 96101_at   | 0.484 | 0.840 | 0.775 | 0.854 | 0.779 |
| 96102_i_at | 0.486 | 1.098 | 1.102 | 1.014 | 1.078 |
| 96103_f_at | 0.470 | 1.148 | 1.112 | 1.113 | 1.143 |
| 96104_at   | 0.390 | 1.367 | 1.296 | 1.206 | 1.338 |

|            |       |       |       |       |       |
|------------|-------|-------|-------|-------|-------|
| 96106_at   | 0.218 | 1.007 | 1.044 | 0.942 | 1.014 |
| 96109_at   | 0.348 | 1.099 | 1.053 | 1.012 | 1.112 |
| 96110_at   | 0.183 | 0.911 | 0.987 | 0.937 | 0.863 |
| 96112_at   | 0.432 | 1.078 | 1.159 | 1.224 | 1.170 |
| 96113_at   | 0.056 | 1.012 | 0.953 | 0.907 | 0.965 |
| 96114_at   | 0.260 | 0.889 | 0.830 | 1.027 | 0.857 |
| 96115_at   | 0.350 | 1.082 | 1.126 | 1.077 | 1.055 |
| 96116_at   | 0.474 | 0.879 | 0.865 | 0.869 | 0.842 |
| 96117_r_at | 0.084 | 1.099 | 1.304 | 0.977 | 1.120 |
| 96118_at   | 0.348 | 0.940 | 0.863 | 0.966 | 0.909 |
| 96119_s_at | 0.117 | 0.867 | 0.915 | 1.006 | 1.179 |
| 96120_at   | 0.223 | 1.380 | 1.319 | 1.126 | 1.228 |
| 96121_at   | 0.316 | 0.981 | 0.983 | 0.994 | 0.955 |
| 96122_at   | 0.340 | 1.160 | 1.095 | 1.341 | 1.084 |
| 96123_at   | 0.313 | 0.996 | 0.927 | 1.066 | 0.974 |
| 96124_at   | 0.215 | 1.151 | 1.082 | 1.147 | 1.061 |
| 96125_at   | 0.356 | 1.029 | 1.005 | 1.011 | 1.048 |
| 96126_at   | 0.209 | 0.843 | 0.902 | 0.956 | 0.945 |
| 96127_at   | 0.212 | 1.399 | 1.659 | 1.196 | 1.453 |
| 96128_at   | 0.189 | 1.025 | 0.948 | 1.020 | 0.962 |
| 96130_at   | 0.232 | 1.254 | 1.154 | 1.112 | 1.276 |
| 96131_at   | 0.235 | 0.912 | 0.991 | 1.027 | 0.912 |
| 96132_at   | 0.053 | 1.022 | 0.910 | 1.078 | 1.029 |
| 96134_at   | 0.022 | 1.003 | 0.884 | 1.122 | 0.799 |
| 96135_at   | 0.117 | 1.272 | 1.443 | 1.034 | 1.528 |
| 96136_at   | 0.431 | 0.933 | 0.899 | 0.963 | 0.899 |
| 96138_at   | 0.323 | 0.893 | 0.886 | 0.964 | 0.890 |
| 96139_at   | 0.383 | 0.948 | 1.001 | 0.965 | 0.978 |
| 96140_at   | 0.184 | 1.122 | 1.035 | 0.994 | 1.137 |
| 96143_at   | 0.478 | 0.890 | 0.852 | 0.937 | 0.852 |
| 96144_at   | 0.421 | 1.034 | 1.055 | 1.080 | 1.036 |
| 96145_at   | 0.318 | 0.956 | 0.916 | 1.000 | 0.926 |
| 96146_at   | 0.240 | 1.310 | 1.378 | 1.113 | 1.326 |
| 96147_at   | 0.258 | 0.935 | 0.883 | 0.959 | 0.867 |
| 96148_at   | 0.328 | 1.124 | 1.011 | 1.033 | 1.039 |
| 96151_at   | 0.327 | 0.961 | 0.986 | 0.996 | 1.001 |
| 96152_at   | 0.490 | 1.165 | 1.184 | 1.070 | 1.172 |
| 96153_at   | 0.454 | 0.906 | 0.858 | 0.925 | 0.920 |
| 96154_at   | 0.058 | 1.061 | 1.157 | 0.965 | 1.245 |
| 96155_at   | 0.043 | 1.001 | 1.111 | 0.963 | 1.049 |
| 96156_at   | 0.200 | 0.908 | 0.905 | 0.925 | 0.959 |
| 96157_at   | 0.109 | 1.146 | 1.045 | 1.017 | 1.099 |
| 96158_at   | 0.422 | 1.185 | 1.154 | 1.075 | 1.152 |
| 96160_at   | 0.107 | 1.013 | 0.880 | 1.055 | 0.912 |
| 96162_at   | 0.355 | 0.863 | 0.885 | 0.882 | 0.887 |
| 96165_at   | 0.350 | 1.373 | 1.329 | 1.123 | 1.335 |
| 96166_at   | 0.145 | 1.200 | 1.196 | 1.094 | 1.100 |

|            |       |       |       |       |       |
|------------|-------|-------|-------|-------|-------|
| 96167_at   | 0.341 | 1.212 | 1.120 | 1.182 | 1.086 |
| 96168_at   | 0.472 | 1.088 | 1.100 | 1.114 | 1.132 |
| 96169_at   | 0.398 | 0.818 | 0.766 | 0.847 | 0.820 |
| 96171_at   | 0.350 | 1.009 | 0.925 | 0.968 | 0.970 |
| 96172_at   | 0.164 | 1.095 | 1.167 | 0.913 | 1.159 |
| 96174_at   | 0.350 | 1.101 | 1.067 | 1.029 | 1.012 |
| 96176_at   | 0.432 | 1.077 | 0.999 | 1.047 | 1.038 |
| 96177_at   | 0.443 | 1.071 | 1.011 | 1.044 | 1.022 |
| 96178_at   | 0.154 | 0.993 | 0.976 | 1.001 | 0.948 |
| 96180_at   | 0.155 | 0.902 | 0.917 | 1.060 | 0.931 |
| 96183_at   | 0.111 | 0.984 | 1.028 | 1.109 | 0.884 |
| 96184_at   | 0.151 | 1.253 | 1.161 | 1.106 | 1.092 |
| 96185_at   | 0.350 | 1.153 | 1.119 | 1.031 | 1.129 |
| 96186_at   | 0.154 | 1.049 | 1.110 | 1.120 | 1.022 |
| 96187_at   | 0.233 | 1.272 | 1.082 | 1.061 | 1.070 |
| 96188_at   | 0.419 | 1.037 | 1.054 | 1.007 | 1.055 |
| 96189_at   | 0.222 | 1.084 | 1.129 | 0.964 | 1.117 |
| 96191_at   | 0.423 | 1.146 | 1.123 | 1.080 | 1.101 |
| 96192_at   | 0.264 | 1.462 | 1.450 | 1.033 | 1.369 |
| 96193_at   | 0.122 | 0.807 | 0.756 | 0.919 | 0.705 |
| 96195_at   | 0.196 | 1.008 | 0.947 | 1.044 | 0.946 |
| 96196_i_at | 0.264 | 0.888 | 0.875 | 0.964 | 0.892 |
| 96197_f_at | 0.350 | 0.982 | 0.951 | 0.910 | 0.953 |
| 96198_at   | 0.470 | 1.087 | 1.104 | 1.057 | 1.100 |
| 96199_at   | 0.440 | 1.284 | 1.255 | 1.103 | 1.285 |
| 96200_at   | 0.059 | 0.999 | 1.052 | 0.995 | 1.149 |
| 96201_at   | 0.207 | 0.914 | 0.923 | 1.010 | 0.929 |
| 96202_at   | 0.281 | 0.883 | 0.812 | 0.939 | 0.892 |
| 96203_at   | 0.288 | 1.136 | 0.972 | 1.047 | 0.973 |
| 96204_at   | 0.220 | 0.913 | 0.966 | 1.000 | 0.991 |
| 96205_at   | 0.246 | 0.977 | 0.932 | 1.092 | 0.856 |
| 96206_at   | 0.130 | 1.068 | 0.948 | 1.073 | 0.923 |
| 96207_at   | 0.167 | 1.352 | 1.182 | 1.009 | 1.241 |
| 96208_at   | 0.281 | 1.111 | 1.099 | 1.039 | 1.019 |
| 96211_at   | 0.287 | 1.168 | 1.066 | 1.085 | 1.050 |
| 96212_at   | 0.239 | 1.106 | 1.203 | 1.277 | 1.043 |
| 96214_at   | 0.240 | 0.884 | 0.839 | 0.982 | 0.930 |
| 96215_f_at | 0.310 | 1.284 | 1.055 | 1.029 | 0.994 |
| 96216_at   | 0.276 | 1.003 | 1.010 | 0.966 | 1.052 |
| 96217_at   | 0.428 | 0.980 | 0.991 | 1.012 | 0.974 |
| 96218_at   | 0.247 | 0.971 | 0.957 | 1.049 | 0.934 |
| 96219_at   | 0.314 | 0.975 | 0.997 | 0.946 | 0.931 |
| 96220_at   | 0.432 | 1.101 | 1.067 | 1.066 | 1.065 |
| 96221_at   | 0.093 | 0.926 | 0.919 | 1.005 | 0.941 |
| 96222_at   | 0.301 | 0.969 | 0.929 | 0.968 | 1.022 |
| 96223_at   | 0.268 | 1.050 | 0.971 | 0.985 | 1.088 |
| 96224_at   | 0.323 | 0.948 | 1.000 | 1.007 | 0.969 |

|            |       |       |       |       |       |
|------------|-------|-------|-------|-------|-------|
| 96226_at   | 0.505 | 0.841 | 0.816 | 0.863 | 0.787 |
| 96227_at   | 0.236 | 0.891 | 0.852 | 0.964 | 0.907 |
| 96228_at   | 0.342 | 0.850 | 0.875 | 0.896 | 0.863 |
| 96229_at   | 0.443 | 0.917 | 0.921 | 0.984 | 0.917 |
| 96230_at   | 0.354 | 0.881 | 0.817 | 0.933 | 0.870 |
| 96231_at   | 0.165 | 1.001 | 0.996 | 1.048 | 0.939 |
| 96232_at   | 0.494 | 1.115 | 1.131 | 1.059 | 1.169 |
| 96234_at   | 0.064 | 1.006 | 1.041 | 0.924 | 1.020 |
| 96236_at   | 0.251 | 1.027 | 1.006 | 0.964 | 0.983 |
| 96237_at   | 0.179 | 0.960 | 0.831 | 1.627 | 0.896 |
| 96238_at   | 0.381 | 1.186 | 1.119 | 1.012 | 1.146 |
| 96239_at   | 0.281 | 1.072 | 1.099 | 1.022 | 1.073 |
| 96240_at   | 0.097 | 1.241 | 1.161 | 1.058 | 1.273 |
| 96241_at   | 0.488 | 0.865 | 0.806 | 0.877 | 0.810 |
| 96242_at   | 0.495 | 0.961 | 0.959 | 0.999 | 0.943 |
| 96243_f_at | 0.424 | 1.353 | 1.353 | 1.120 | 1.352 |
| 96244_at   | 0.250 | 0.840 | 0.845 | 0.965 | 0.850 |
| 96245_at   | 0.213 | 0.983 | 1.015 | 0.969 | 0.988 |
| 96249_at   | 0.375 | 0.844 | 0.936 | 0.892 | 1.013 |
| 96252_at   | 0.364 | 1.195 | 1.316 | 1.154 | 1.195 |
| 96254_at   | 0.474 | 1.307 | 1.256 | 1.185 | 1.376 |
| 96255_at   | 0.477 | 1.212 | 1.176 | 1.151 | 1.221 |
| 96256_at   | 0.497 | 1.051 | 1.075 | 1.047 | 1.102 |
| 96257_at   | 0.344 | 1.059 | 1.023 | 1.056 | 1.075 |
| 96258_at   | 0.428 | 1.130 | 1.037 | 1.124 | 1.154 |
| 96259_at   | 0.193 | 1.098 | 1.007 | 1.081 | 0.960 |
| 96260_at   | 0.232 | 1.269 | 1.363 | 1.135 | 1.235 |
| 96261_at   | 0.163 | 1.094 | 1.096 | 0.997 | 1.213 |
| 96262_at   | 0.339 | 1.236 | 1.287 | 1.101 | 1.262 |
| 96263_at   | 0.326 | 1.003 | 0.985 | 1.063 | 0.965 |
| 96264_at   | 0.297 | 1.041 | 1.029 | 0.993 | 1.028 |
| 96266_at   | 0.121 | 1.268 | 1.229 | 1.022 | 1.104 |
| 96267_at   | 0.369 | 0.944 | 1.012 | 1.083 | 0.983 |
| 96268_at   | 0.398 | 0.927 | 0.999 | 1.093 | 0.984 |
| 96269_at   | 0.167 | 1.059 | 1.164 | 0.943 | 0.974 |
| 96270_at   | 0.406 | 1.151 | 1.149 | 1.138 | 1.117 |
| 96271_at   | 0.400 | 1.142 | 1.279 | 1.082 | 1.282 |
| 96272_at   | 0.263 | 1.243 | 1.036 | 1.163 | 1.083 |
| 96273_at   | 0.407 | 0.942 | 0.895 | 0.976 | 0.869 |
| 96275_f_at | 0.299 | 1.114 | 1.015 | 0.925 | 1.063 |
| 96276_r_at | 0.465 | 1.014 | 0.980 | 0.992 | 1.018 |
| 96277_at   | 0.369 | 0.971 | 1.035 | 0.981 | 1.016 |
| 96278_at   | 0.035 | 1.119 | 1.302 | 1.003 | 1.261 |
| 96280_at   | 0.341 | 1.130 | 1.170 | 1.015 | 1.103 |
| 96281_at   | 0.287 | 1.259 | 1.358 | 1.105 | 1.244 |
| 96283_at   | 0.158 | 1.213 | 1.282 | 1.061 | 1.176 |
| 96284_at   | 0.420 | 1.159 | 1.104 | 1.060 | 1.138 |



|            |       |       |       |       |       |
|------------|-------|-------|-------|-------|-------|
| 96285_at   | 0.184 | 1.331 | 1.175 | 1.114 | 1.192 |
| 96286_at   | 0.461 | 0.906 | 0.894 | 0.951 | 0.922 |
| 96287_at   | 0.404 | 0.916 | 0.870 | 0.910 | 0.860 |
| 96288_at   | 0.307 | 0.988 | 1.006 | 0.953 | 0.940 |
| 96289_at   | 0.270 | 0.931 | 1.021 | 0.940 | 0.958 |
| 96290_f_at | 0.207 | 1.000 | 1.002 | 0.920 | 1.044 |
| 96291_f_at | 0.392 | 1.169 | 1.207 | 1.032 | 1.129 |
| 96292_r_at | 0.477 | 0.922 | 0.933 | 0.956 | 0.934 |
| 96293_at   | 0.257 | 0.863 | 0.957 | 0.925 | 0.922 |
| 96294_s_at | 0.220 | 0.834 | 0.889 | 0.902 | 0.907 |
| 96295_at   | 0.075 | 1.054 | 1.483 | 1.037 | 1.286 |
| 96296_at   | 0.365 | 0.841 | 0.877 | 0.952 | 0.834 |
| 96297_at   | 0.308 | 1.049 | 1.069 | 0.984 | 1.112 |
| 96298_f_at | 0.369 | 1.052 | 1.010 | 1.069 | 0.976 |
| 96299_at   | 0.220 | 1.217 | 1.178 | 1.072 | 1.132 |
| 96300_f_at | 0.500 | 0.921 | 0.918 | 0.903 | 0.906 |
| 96301_at   | 0.432 | 0.908 | 0.873 | 0.943 | 0.919 |
| 96302_at   | 0.221 | 1.176 | 1.117 | 0.987 | 1.345 |
| 96305_at   | 0.357 | 1.061 | 1.100 | 1.030 | 1.118 |
| 96306_at   | 0.403 | 0.927 | 0.889 | 0.961 | 0.931 |
| 96307_s_at | 0.179 | 1.074 | 1.071 | 0.933 | 1.144 |
| 96308_r_at | 0.422 | 0.840 | 0.785 | 0.890 | 0.800 |
| 96309_r_at | 0.474 | 0.790 | 0.748 | 0.797 | 0.672 |
| 96310_at   | 0.428 | 1.089 | 1.072 | 1.082 | 1.071 |
| 96311_at   | 0.310 | 0.859 | 0.853 | 1.087 | 0.845 |
| 96313_at   | 0.458 | 0.995 | 1.015 | 1.012 | 1.000 |
| 96316_at   | 0.353 | 0.921 | 0.899 | 0.920 | 0.966 |
| 96318_at   | 0.241 | 0.960 | 1.030 | 0.950 | 0.958 |
| 96319_at   | 0.093 | 1.041 | 1.178 | 0.999 | 1.284 |
| 96320_at   | 0.220 | 1.253 | 1.230 | 1.123 | 1.111 |
| 96321_at   | 0.376 | 1.231 | 1.375 | 1.169 | 1.261 |
| 96322_at   | 0.403 | 0.956 | 1.050 | 1.001 | 1.047 |
| 96324_at   | 0.483 | 0.828 | 0.780 | 0.876 | 0.806 |
| 96325_at   | 0.431 | 1.158 | 1.230 | 1.118 | 1.151 |
| 96326_at   | 0.222 | 0.903 | 0.842 | 0.951 | 0.891 |
| 96327_at   | 0.134 | 1.014 | 0.899 | 0.950 | 0.949 |
| 96329_at   | 0.480 | 1.078 | 1.074 | 1.051 | 1.064 |
| 96331_at   | 0.224 | 1.087 | 1.145 | 0.980 | 1.106 |
| 96332_at   | 0.345 | 0.832 | 0.813 | 0.877 | 0.858 |
| 96333_g_at | 0.151 | 0.866 | 1.032 | 1.007 | 1.081 |
| 96334_f_at | 0.090 | 0.873 | 0.803 | 0.961 | 0.857 |
| 96335_at   | 0.272 | 0.873 | 0.929 | 0.960 | 0.869 |
| 96336_at   | 0.047 | 1.295 | 3.344 | 1.234 | 1.672 |
| 96337_at   | 0.181 | 0.932 | 0.866 | 1.037 | 0.886 |
| 96338_at   | 0.308 | 1.130 | 1.077 | 1.026 | 1.130 |
| 96339_at   | 0.353 | 0.873 | 0.838 | 0.902 | 0.842 |
| 96340_at   | 0.264 | 1.136 | 1.095 | 1.086 | 1.045 |

|            |       |       |       |       |       |
|------------|-------|-------|-------|-------|-------|
| 96341_at   | 0.116 | 1.118 | 1.114 | 0.953 | 1.169 |
| 96342_at   | 0.035 | 0.943 | 0.957 | 0.887 | 1.039 |
| 96343_at   | 0.314 | 1.250 | 1.241 | 1.179 | 1.353 |
| 96344_at   | 0.235 | 0.923 | 0.802 | 1.153 | 0.804 |
| 96345_at   | 0.346 | 1.155 | 1.163 | 1.081 | 1.111 |
| 96346_at   | 0.071 | 1.200 | 1.085 | 1.307 | 0.913 |
| 96347_at   | 0.465 | 0.966 | 0.947 | 0.999 | 0.970 |
| 96348_at   | 0.204 | 1.041 | 0.986 | 1.304 | 0.925 |
| 96351_at   | 0.123 | 0.955 | 1.034 | 1.056 | 1.073 |
| 96352_at   | 0.409 | 1.004 | 1.040 | 1.018 | 1.100 |
| 96353_at   | 0.235 | 1.014 | 1.171 | 1.095 | 1.122 |
| 96354_at   | 0.109 | 1.250 | 1.253 | 1.066 | 1.229 |
| 96355_at   | 0.458 | 0.935 | 0.899 | 0.945 | 0.933 |
| 96356_at   | 0.258 | 0.932 | 1.011 | 0.957 | 0.954 |
| 96357_at   | 0.353 | 1.008 | 1.059 | 1.035 | 1.053 |
| 96358_at   | 0.069 | 0.942 | 0.961 | 0.869 | 1.023 |
| 96359_at   | 0.314 | 1.141 | 1.196 | 1.038 | 1.050 |
| 96360_at   | 0.244 | 1.141 | 1.138 | 1.156 | 1.048 |
| 96365_at   | 0.427 | 1.000 | 1.019 | 1.049 | 1.002 |
| 96367_at   | 0.228 | 0.903 | 0.823 | 0.868 | 0.921 |
| 96373_at   | 0.400 | 0.968 | 0.934 | 0.996 | 0.945 |
| 96374_at   | 0.377 | 0.972 | 0.909 | 0.954 | 0.922 |
| 96375_at   | 0.130 | 0.936 | 0.855 | 0.959 | 0.957 |
| 96387_at   | 0.320 | 0.834 | 0.838 | 0.870 | 0.877 |
| 96388_at   | 0.490 | 0.975 | 0.939 | 0.980 | 0.929 |
| 96389_at   | 0.277 | 0.905 | 0.807 | 0.905 | 0.808 |
| 96390_at   | 0.183 | 0.870 | 0.839 | 0.861 | 0.870 |
| 96391_at   | 0.497 | 0.899 | 0.897 | 0.937 | 0.890 |
| 96392_at   | 0.401 | 0.885 | 0.869 | 0.952 | 0.902 |
| 96393_at   | 0.483 | 0.932 | 0.906 | 0.937 | 0.874 |
| 96394_at   | 0.336 | 0.816 | 0.805 | 0.898 | 0.820 |
| 96400_at   | 0.391 | 0.856 | 0.841 | 0.908 | 0.853 |
| 96408_at   | 0.267 | 0.973 | 1.013 | 1.025 | 0.992 |
| 96413_at   | 0.422 | 0.959 | 0.954 | 0.973 | 0.976 |
| 96414_at   | 0.307 | 0.935 | 0.876 | 0.961 | 0.916 |
| 96416_f_at | 0.219 | 0.804 | 0.827 | 0.897 | 0.863 |
| 96417_s_at | 0.396 | 0.946 | 0.896 | 0.983 | 0.924 |
| 96418_r_at | 0.206 | 0.836 | 0.786 | 0.960 | 0.883 |
| 96419_f_at | 0.361 | 0.839 | 0.859 | 0.894 | 0.804 |
| 96420_at   | 0.415 | 0.900 | 0.888 | 0.902 | 0.913 |
| 96421_at   | 0.234 | 0.913 | 0.805 | 1.163 | 0.816 |
| 96422_at   | 0.309 | 0.769 | 0.794 | 0.879 | 0.787 |
| 96423_at   | 0.308 | 0.865 | 0.786 | 0.881 | 0.851 |
| 96424_at   | 0.468 | 0.897 | 0.838 | 0.885 | 0.859 |
| 96426_at   | 0.425 | 0.962 | 1.010 | 0.936 | 0.988 |
| 96431_at   | 0.379 | 0.877 | 0.865 | 0.914 | 0.903 |
| 96433_at   | 0.245 | 1.019 | 1.093 | 1.067 | 1.068 |

|            |       |       |       |       |       |
|------------|-------|-------|-------|-------|-------|
| 96435_at   | 0.220 | 0.922 | 0.861 | 0.928 | 0.870 |
| 96464_at   | 0.117 | 0.721 | 0.897 | 0.957 | 0.906 |
| 96474_at   | 0.232 | 0.842 | 0.833 | 0.908 | 0.850 |
| 96481_at   | 0.354 | 0.932 | 0.965 | 0.971 | 0.906 |
| 96482_at   | 0.509 | 0.885 | 0.868 | 0.898 | 0.872 |
| 96483_at   | 0.263 | 0.862 | 0.879 | 0.907 | 0.942 |
| 96484_at   | 0.240 | 0.942 | 0.871 | 0.953 | 0.972 |
| 96485_at   | 0.465 | 0.871 | 0.842 | 0.896 | 0.876 |
| 96486_at   | 0.423 | 0.975 | 1.002 | 1.029 | 0.982 |
| 96487_at   | 0.443 | 0.836 | 0.816 | 0.882 | 0.857 |
| 96488_at   | 0.314 | 0.896 | 0.868 | 0.858 | 0.884 |
| 96489_at   | 0.285 | 0.979 | 0.925 | 0.949 | 0.973 |
| 96490_at   | 0.505 | 0.970 | 0.965 | 0.974 | 0.946 |
| 96491_at   | 0.505 | 0.933 | 0.921 | 0.955 | 0.922 |
| 96492_at   | 0.196 | 0.918 | 0.898 | 1.020 | 0.949 |
| 96493_at   | 0.454 | 0.914 | 0.882 | 0.972 | 0.890 |
| 96494_at   | 0.325 | 0.785 | 0.872 | 0.845 | 0.901 |
| 96495_at   | 0.468 | 0.810 | 0.837 | 0.855 | 0.749 |
| 96496_g_at | 0.228 | 0.903 | 0.912 | 0.971 | 0.932 |
| 96497_s_at | 0.484 | 0.963 | 0.926 | 0.976 | 0.939 |
| 96498_at   | 0.264 | 0.941 | 0.952 | 0.992 | 0.892 |
| 96499_at   | 0.320 | 1.060 | 1.019 | 1.013 | 0.989 |
| 96500_at   | 0.307 | 1.100 | 0.990 | 1.060 | 0.990 |
| 96501_at   | 0.285 | 0.896 | 0.926 | 0.926 | 0.941 |
| 96502_at   | 0.211 | 0.947 | 0.914 | 1.031 | 0.977 |
| 96503_at   | 0.258 | 0.871 | 0.795 | 0.933 | 0.838 |
| 96504_at   | 0.378 | 0.844 | 0.822 | 0.919 | 0.824 |
| 96505_at   | 0.298 | 0.876 | 0.819 | 0.970 | 0.895 |
| 96506_at   | 0.459 | 0.903 | 0.844 | 0.915 | 0.881 |
| 96507_at   | 0.375 | 0.843 | 0.842 | 0.909 | 0.892 |
| 96508_at   | 0.272 | 0.877 | 0.897 | 0.999 | 0.944 |
| 96509_at   | 0.318 | 0.910 | 0.865 | 0.930 | 0.919 |
| 96510_at   | 0.167 | 0.854 | 0.883 | 1.014 | 1.018 |
| 96511_s_at | 0.136 | 0.964 | 1.089 | 0.986 | 1.040 |
| 96512_at   | 0.168 | 0.792 | 0.823 | 0.927 | 0.878 |
| 96513_at   | 0.393 | 1.009 | 1.054 | 0.950 | 1.067 |
| 96514_at   | 0.324 | 0.931 | 0.908 | 0.988 | 0.948 |
| 96515_at   | 0.100 | 0.770 | 1.057 | 0.832 | 0.850 |
| 96516_at   | 0.486 | 1.178 | 1.191 | 1.124 | 1.263 |
| 96517_at   | 0.470 | 0.921 | 0.900 | 0.928 | 0.848 |
| 96518_at   | 0.142 | 1.252 | 1.168 | 1.088 | 1.056 |
| 96519_at   | 0.230 | 0.865 | 0.824 | 0.944 | 0.939 |
| 96520_at   | 0.391 | 0.989 | 0.950 | 1.014 | 0.951 |
| 96521_at   | 0.298 | 0.894 | 0.929 | 0.970 | 0.932 |
| 96522_at   | 0.167 | 1.028 | 0.997 | 1.054 | 0.940 |
| 96523_at   | 0.337 | 0.896 | 0.847 | 0.949 | 0.949 |
| 96524_at   | 0.424 | 0.979 | 0.931 | 0.980 | 0.975 |

|            |       |       |       |       |       |
|------------|-------|-------|-------|-------|-------|
| 96525_at   | 0.425 | 0.956 | 0.939 | 0.973 | 0.888 |
| 96526_at   | 0.167 | 1.401 | 1.166 | 0.996 | 1.321 |
| 96527_at   | 0.343 | 0.825 | 0.776 | 0.908 | 0.849 |
| 96528_at   | 0.328 | 0.863 | 0.825 | 0.901 | 0.862 |
| 96529_at   | 0.151 | 1.008 | 1.000 | 0.989 | 1.094 |
| 96530_at   | 0.308 | 1.251 | 1.173 | 1.256 | 1.100 |
| 96531_at   | 0.180 | 0.935 | 0.963 | 0.964 | 1.000 |
| 96532_at   | 0.267 | 1.069 | 1.100 | 1.022 | 1.048 |
| 96533_at   | 0.226 | 1.238 | 1.235 | 1.071 | 1.153 |
| 96534_at   | 0.210 | 0.998 | 0.880 | 0.961 | 0.962 |
| 96535_at   | 0.117 | 1.092 | 1.071 | 1.027 | 0.972 |
| 96536_at   | 0.467 | 0.863 | 0.833 | 0.897 | 0.829 |
| 96537_at   | 0.367 | 0.923 | 0.905 | 0.885 | 0.916 |
| 96538_at   | 0.449 | 0.997 | 0.948 | 1.019 | 0.952 |
| 96539_at   | 0.226 | 1.005 | 0.876 | 0.836 | 0.924 |
| 96540_at   | 0.182 | 1.010 | 1.179 | 0.985 | 0.946 |
| 96541_at   | 0.390 | 0.999 | 0.897 | 0.985 | 0.945 |
| 96542_at   | 0.301 | 0.965 | 0.994 | 1.000 | 0.952 |
| 96543_at   | 0.302 | 0.923 | 0.904 | 0.889 | 0.895 |
| 96544_at   | 0.417 | 0.941 | 0.872 | 0.937 | 0.870 |
| 96545_s_at | 0.167 | 1.486 | 1.338 | 1.086 | 1.283 |
| 96546_r_at | 0.171 | 0.937 | 0.896 | 0.988 | 0.914 |
| 96547_at   | 0.495 | 0.874 | 0.851 | 0.880 | 0.856 |
| 96548_at   | 0.322 | 0.891 | 0.893 | 0.999 | 0.872 |
| 96549_at   | 0.076 | 0.907 | 0.836 | 0.966 | 0.899 |
| 96550_at   | 0.363 | 0.830 | 0.807 | 0.915 | 0.833 |
| 96551_at   | 0.347 | 0.893 | 0.886 | 0.929 | 0.937 |
| 96552_at   | 0.418 | 0.920 | 0.902 | 0.954 | 0.944 |
| 96553_at   | 0.184 | 1.017 | 1.136 | 1.018 | 1.064 |
| 96554_r_at | 0.325 | 0.910 | 0.845 | 0.940 | 0.916 |
| 96555_at   | 0.397 | 0.835 | 0.842 | 0.892 | 0.888 |
| 96556_at   | 0.472 | 0.881 | 0.837 | 0.915 | 0.840 |
| 96557_at   | 0.219 | 0.900 | 0.922 | 0.959 | 0.830 |
| 96558_at   | 0.370 | 0.965 | 1.001 | 1.032 | 1.006 |
| 96559_at   | 0.441 | 0.969 | 0.938 | 0.959 | 0.958 |
| 96560_at   | 0.372 | 1.106 | 1.056 | 1.104 | 1.072 |
| 96561_at   | 0.251 | 1.114 | 1.042 | 1.000 | 1.071 |
| 96562_at   | 0.296 | 0.933 | 0.970 | 0.968 | 1.024 |
| 96563_at   | 0.174 | 0.944 | 0.932 | 1.002 | 0.884 |
| 96564_at   | 0.220 | 0.990 | 0.864 | 1.012 | 0.896 |
| 96565_at   | 0.270 | 0.922 | 0.940 | 0.987 | 0.886 |
| 96566_at   | 0.376 | 0.960 | 0.944 | 1.147 | 0.936 |
| 96567_at   | 0.496 | 0.932 | 0.912 | 0.987 | 0.927 |
| 96568_at   | 0.354 | 0.908 | 0.818 | 0.922 | 0.883 |
| 96569_at   | 0.288 | 0.866 | 0.783 | 0.900 | 0.912 |
| 96570_at   | 0.443 | 1.003 | 1.040 | 0.975 | 1.015 |
| 96571_at   | 0.392 | 0.867 | 0.886 | 0.949 | 0.868 |

|            |       |       |       |       |       |
|------------|-------|-------|-------|-------|-------|
| 96572_at   | 0.224 | 1.122 | 1.023 | 0.980 | 1.054 |
| 96573_at   | 0.219 | 1.021 | 1.033 | 1.021 | 0.983 |
| 96574_at   | 0.405 | 0.939 | 0.870 | 0.966 | 0.916 |
| 96575_at   | 0.175 | 1.047 | 1.086 | 0.977 | 1.091 |
| 96576_at   | 0.411 | 0.800 | 0.769 | 0.832 | 0.808 |
| 96577_i_at | 0.190 | 1.314 | 1.170 | 1.020 | 1.192 |
| 96578_r_at | 0.329 | 1.369 | 1.175 | 1.136 | 1.153 |
| 96579_at   | 0.146 | 1.015 | 0.942 | 1.007 | 1.002 |
| 96580_at   | 0.372 | 0.961 | 1.064 | 1.091 | 1.115 |
| 96581_at   | 0.280 | 0.922 | 0.899 | 1.016 | 0.941 |
| 96582_at   | 0.331 | 0.874 | 0.908 | 0.933 | 0.918 |
| 96583_s_at | 0.376 | 0.881 | 0.845 | 0.919 | 0.874 |
| 96584_f_at | 0.409 | 0.870 | 0.825 | 0.889 | 0.858 |
| 96585_at   | 0.293 | 0.952 | 0.857 | 0.959 | 0.899 |
| 96586_at   | 0.502 | 0.849 | 0.818 | 0.878 | 0.827 |
| 96587_at   | 0.089 | 0.757 | 0.880 | 0.990 | 0.910 |
| 96588_at   | 0.244 | 0.986 | 0.954 | 1.126 | 1.021 |
| 96589_at   | 0.432 | 0.801 | 0.776 | 0.798 | 0.761 |
| 96590_f_at | 0.147 | 1.238 | 0.984 | 1.152 | 1.046 |
| 96591_at   | 0.188 | 0.991 | 0.918 | 1.050 | 1.004 |
| 96592_at   | 0.333 | 0.960 | 1.010 | 1.109 | 1.157 |
| 96593_at   | 0.148 | 0.863 | 0.796 | 0.935 | 0.865 |
| 96594_at   | 0.200 | 1.254 | 1.099 | 1.006 | 1.095 |
| 96595_at   | 0.468 | 0.864 | 0.819 | 0.886 | 0.839 |
| 96596_at   | 0.204 | 1.063 | 0.980 | 1.038 | 0.953 |
| 96597_at   | 0.436 | 0.889 | 0.840 | 0.890 | 0.888 |
| 96598_at   | 0.459 | 1.115 | 1.084 | 1.074 | 1.157 |
| 96599_at   | 0.224 | 1.335 | 1.190 | 1.113 | 1.318 |
| 96600_at   | 0.250 | 0.900 | 0.913 | 0.999 | 0.978 |
| 96601_at   | 0.350 | 0.872 | 0.855 | 0.960 | 0.821 |
| 96602_g_at | 0.091 | 0.916 | 1.348 | 1.067 | 0.951 |
| 96603_at   | 0.051 | 1.084 | 1.465 | 1.042 | 0.974 |
| 96604_at   | 0.397 | 1.029 | 0.978 | 0.987 | 0.994 |
| 96605_at   | 0.025 | 1.274 | 1.765 | 1.150 | 1.317 |
| 96606_at   | 0.147 | 0.724 | 0.923 | 1.030 | 0.962 |
| 96607_at   | 0.279 | 1.053 | 1.033 | 1.086 | 1.110 |
| 96608_at   | 0.112 | 1.104 | 1.344 | 1.143 | 1.122 |
| 96609_at   | 0.196 | 1.343 | 1.321 | 1.023 | 1.288 |
| 96610_at   | 0.128 | 1.222 | 1.273 | 1.040 | 1.189 |
| 96611_at   | 0.392 | 0.984 | 1.064 | 1.051 | 1.053 |
| 96613_at   | 0.145 | 1.050 | 1.303 | 0.982 | 1.296 |
| 96614_at   | 0.345 | 1.241 | 1.299 | 1.156 | 1.158 |
| 96615_at   | 0.096 | 0.969 | 0.903 | 1.052 | 0.930 |
| 96616_at   | 0.373 | 1.147 | 1.212 | 1.024 | 1.187 |
| 96617_at   | 0.337 | 1.109 | 1.065 | 1.087 | 1.006 |
| 96618_at   | 0.188 | 0.906 | 0.935 | 0.910 | 0.955 |
| 96619_at   | 0.278 | 0.946 | 0.889 | 0.923 | 0.960 |

|            |       |       |       |       |       |
|------------|-------|-------|-------|-------|-------|
| 96620_at   | 0.400 | 0.816 | 0.769 | 0.885 | 0.831 |
| 96621_at   | 0.416 | 1.037 | 1.038 | 1.004 | 1.023 |
| 96623_at   | 0.189 | 1.280 | 1.517 | 0.999 | 1.359 |
| 96624_r_at | 0.504 | 0.801 | 0.784 | 0.828 | 0.763 |
| 96625_at   | 0.287 | 0.863 | 0.839 | 0.840 | 0.889 |
| 96626_at   | 0.432 | 1.141 | 1.212 | 1.203 | 1.166 |
| 96627_at   | 0.205 | 1.324 | 1.337 | 1.077 | 1.227 |
| 96628_at   | 0.452 | 1.465 | 1.459 | 1.276 | 1.333 |
| 96629_at   | 0.346 | 1.117 | 1.127 | 1.037 | 1.197 |
| 96630_at   | 0.458 | 0.952 | 0.915 | 0.923 | 0.918 |
| 96632_at   | 0.293 | 1.081 | 1.149 | 0.976 | 1.077 |
| 96633_s_at | 0.454 | 1.212 | 1.292 | 1.030 | 1.266 |
| 96634_at   | 0.360 | 1.071 | 1.010 | 1.235 | 0.981 |
| 96635_at   | 0.332 | 1.144 | 1.119 | 1.044 | 1.089 |
| 96636_at   | 0.318 | 1.045 | 1.083 | 1.002 | 1.007 |
| 96637_at   | 0.347 | 0.930 | 0.878 | 0.955 | 0.937 |
| 96638_at   | 0.388 | 1.031 | 1.057 | 1.007 | 1.022 |
| 96639_at   | 0.209 | 0.948 | 0.892 | 0.954 | 0.958 |
| 96640_at   | 0.139 | 1.062 | 1.440 | 0.976 | 1.120 |
| 96641_at   | 0.175 | 1.137 | 1.249 | 1.036 | 1.246 |
| 96643_at   | 0.159 | 1.224 | 1.110 | 1.185 | 1.135 |
| 96644_at   | 0.380 | 0.869 | 0.840 | 0.927 | 0.866 |
| 96646_at   | 0.290 | 1.129 | 1.044 | 1.085 | 1.095 |
| 96647_at   | 0.270 | 1.076 | 1.190 | 0.986 | 1.153 |
| 96648_at   | 0.069 | 0.823 | 1.078 | 0.768 | 0.938 |
| 96649_at   | 0.433 | 1.176 | 1.165 | 1.093 | 1.230 |
| 96650_at   | 0.276 | 0.920 | 0.917 | 0.979 | 0.886 |
| 96651_at   | 0.328 | 1.199 | 1.150 | 1.027 | 1.152 |
| 96652_at   | 0.367 | 1.138 | 1.121 | 1.025 | 1.106 |
| 96653_at   | 0.162 | 1.081 | 1.206 | 1.052 | 1.247 |
| 96654_at   | 0.198 | 1.002 | 0.935 | 1.022 | 1.045 |
| 96655_g_at | 0.121 | 0.956 | 0.884 | 0.928 | 0.931 |
| 96656_at   | 0.272 | 1.329 | 1.194 | 1.111 | 1.214 |
| 96657_at   | 0.272 | 1.214 | 1.278 | 1.074 | 1.186 |
| 96658_at   | 0.303 | 1.015 | 1.176 | 1.034 | 1.154 |
| 96661_at   | 0.379 | 1.164 | 1.171 | 1.077 | 1.176 |
| 96662_at   | 0.173 | 1.168 | 1.092 | 1.176 | 1.019 |
| 96663_at   | 0.160 | 1.106 | 1.113 | 0.984 | 1.064 |
| 96664_at   | 0.240 | 1.211 | 1.133 | 1.148 | 1.034 |
| 96665_at   | 0.253 | 1.090 | 1.124 | 1.000 | 1.126 |
| 96666_at   | 0.481 | 1.066 | 1.042 | 0.997 | 1.082 |
| 96667_at   | 0.147 | 1.158 | 1.236 | 1.089 | 1.227 |
| 96668_at   | 0.410 | 0.908 | 0.857 | 0.909 | 0.903 |
| 96669_at   | 0.392 | 1.220 | 1.154 | 1.098 | 1.132 |
| 96670_at   | 0.261 | 1.163 | 1.150 | 1.035 | 1.148 |
| 96672_at   | 0.057 | 1.073 | 0.957 | 1.003 | 0.942 |
| 96674_at   | 0.232 | 1.283 | 1.329 | 1.223 | 1.108 |

|            |       |       |       |       |       |
|------------|-------|-------|-------|-------|-------|
| 96675_at   | 0.373 | 1.143 | 1.155 | 1.021 | 1.180 |
| 96676_at   | 0.312 | 0.951 | 0.981 | 0.973 | 0.920 |
| 96677_at   | 0.216 | 1.068 | 1.007 | 1.124 | 0.935 |
| 96678_at   | 0.468 | 0.984 | 1.015 | 1.011 | 1.009 |
| 96679_at   | 0.176 | 0.621 | 0.898 | 0.999 | 0.836 |
| 96680_at   | 0.401 | 1.138 | 1.206 | 0.959 | 1.127 |
| 96682_at   | 0.389 | 1.011 | 1.009 | 1.034 | 1.036 |
| 96684_at   | 0.119 | 1.079 | 0.994 | 1.077 | 1.097 |
| 96685_at   | 0.314 | 0.797 | 0.746 | 0.879 | 0.790 |
| 96686_i_at | 0.318 | 1.214 | 1.230 | 1.064 | 1.221 |
| 96687_f_at | 0.330 | 1.269 | 1.272 | 1.052 | 1.291 |
| 96688_at   | 0.240 | 1.241 | 1.209 | 1.018 | 1.248 |
| 96691_at   | 0.184 | 0.958 | 0.971 | 0.927 | 1.009 |
| 96692_at   | 0.440 | 1.002 | 0.955 | 0.938 | 0.999 |
| 96693_at   | 0.210 | 1.220 | 1.320 | 1.028 | 1.313 |
| 96694_at   | 0.379 | 0.916 | 0.896 | 0.973 | 0.924 |
| 96695_at   | 0.369 | 1.051 | 1.031 | 1.070 | 1.122 |
| 96696_at   | 0.230 | 1.226 | 1.418 | 0.982 | 1.258 |
| 96698_at   | 0.293 | 0.982 | 0.977 | 0.942 | 0.995 |
| 96699_at   | 0.256 | 1.110 | 1.073 | 0.994 | 1.103 |
| 96700_r_at | 0.302 | 1.015 | 1.055 | 0.967 | 1.069 |
| 96701_at   | 0.236 | 1.193 | 1.212 | 1.009 | 1.153 |
| 96703_at   | 0.183 | 1.031 | 1.137 | 1.029 | 1.030 |
| 96704_at   | 0.277 | 0.908 | 0.876 | 1.035 | 0.800 |
| 96707_at   | 0.207 | 1.159 | 1.122 | 1.007 | 1.143 |
| 96708_at   | 0.134 | 1.193 | 1.531 | 1.070 | 1.198 |
| 96709_at   | 0.330 | 0.994 | 1.263 | 1.080 | 1.167 |
| 96710_at   | 0.178 | 1.206 | 1.098 | 0.998 | 1.187 |
| 96711_at   | 0.425 | 1.069 | 1.083 | 0.994 | 1.077 |
| 96712_at   | 0.239 | 0.911 | 0.892 | 1.073 | 0.905 |
| 96713_at   | 0.139 | 1.050 | 0.926 | 1.091 | 1.000 |
| 96716_at   | 0.440 | 0.980 | 1.022 | 1.014 | 1.019 |
| 96717_at   | 0.113 | 1.015 | 1.016 | 0.927 | 1.015 |
| 96718_at   | 0.359 | 0.995 | 0.995 | 1.040 | 1.025 |
| 96719_i_at | 0.228 | 0.853 | 0.789 | 0.971 | 0.814 |
| 96720_f_at | 0.496 | 1.034 | 1.015 | 1.038 | 0.992 |
| 96722_at   | 0.468 | 0.831 | 0.812 | 0.886 | 0.824 |
| 96723_f_at | 0.111 | 1.093 | 1.002 | 0.990 | 1.040 |
| 96724_r_at | 0.415 | 1.286 | 1.243 | 1.161 | 1.263 |
| 96725_at   | 0.147 | 1.055 | 0.953 | 1.119 | 0.901 |
| 96726_at   | 0.434 | 1.275 | 1.350 | 1.164 | 1.422 |
| 96728_at   | 0.154 | 1.157 | 1.043 | 0.974 | 1.143 |
| 96729_at   | 0.140 | 0.826 | 0.839 | 1.048 | 0.859 |
| 96730_at   | 0.165 | 0.948 | 0.958 | 1.121 | 0.933 |
| 96731_at   | 0.310 | 1.357 | 1.248 | 1.145 | 1.309 |
| 96732_at   | 0.477 | 1.039 | 1.072 | 1.031 | 1.138 |
| 96733_at   | 0.384 | 1.019 | 1.110 | 1.053 | 1.093 |

|            |       |       |       |       |       |
|------------|-------|-------|-------|-------|-------|
| 96734_at   | 0.175 | 0.996 | 0.960 | 0.955 | 0.919 |
| 96735_at   | 0.395 | 0.994 | 1.009 | 1.050 | 0.942 |
| 96736_at   | 0.467 | 1.129 | 1.111 | 1.124 | 1.182 |
| 96737_at   | 0.411 | 0.980 | 0.997 | 0.962 | 0.955 |
| 96738_at   | 0.303 | 1.237 | 1.568 | 1.089 | 1.393 |
| 96739_at   | 0.408 | 0.898 | 0.924 | 0.925 | 0.918 |
| 96741_at   | 0.369 | 1.341 | 1.218 | 1.200 | 1.187 |
| 96742_at   | 0.380 | 1.026 | 0.999 | 1.072 | 1.078 |
| 96743_at   | 0.283 | 0.955 | 1.060 | 0.888 | 1.105 |
| 96744_at   | 0.075 | 0.927 | 0.876 | 1.000 | 0.913 |
| 96745_at   | 0.484 | 0.851 | 0.815 | 0.881 | 0.840 |
| 96746_at   | 0.181 | 0.977 | 0.901 | 1.047 | 1.003 |
| 96747_at   | 0.246 | 1.130 | 1.019 | 1.118 | 0.974 |
| 96748_i_at | 0.475 | 1.085 | 1.087 | 1.031 | 1.066 |
| 96749_f_at | 0.314 | 1.080 | 0.996 | 0.926 | 0.994 |
| 96750_at   | 0.198 | 1.215 | 1.136 | 1.060 | 1.077 |
| 96751_at   | 0.166 | 1.201 | 1.222 | 1.008 | 1.227 |
| 96752_at   | 0.246 | 1.117 | 1.162 | 1.004 | 1.034 |
| 96753_at   | 0.283 | 1.048 | 1.084 | 1.069 | 0.997 |
| 96754_s_at | 0.273 | 1.190 | 1.142 | 1.034 | 1.177 |
| 96755_at   | 0.475 | 1.084 | 1.089 | 1.012 | 1.099 |
| 96756_at   | 0.375 | 0.937 | 0.917 | 0.998 | 0.931 |
| 96757_at   | 0.322 | 0.980 | 0.977 | 1.050 | 0.948 |
| 96758_s_at | 0.379 | 0.941 | 0.866 | 0.989 | 0.922 |
| 96759_r_at | 0.494 | 0.768 | 0.753 | 0.802 | 0.719 |
| 96760_at   | 0.239 | 0.852 | 0.922 | 0.914 | 0.910 |
| 96761_at   | 0.223 | 0.997 | 1.086 | 1.047 | 0.991 |
| 96762_at   | 0.422 | 1.255 | 1.272 | 1.098 | 1.242 |
| 96763_at   | 0.388 | 0.984 | 0.980 | 1.020 | 0.966 |
| 96764_at   | 0.145 | 0.974 | 1.355 | 1.030 | 1.055 |
| 96765_at   | 0.376 | 1.123 | 1.020 | 1.078 | 1.147 |
| 96766_s_at | 0.480 | 1.013 | 0.985 | 1.003 | 1.044 |
| 96767_at   | 0.376 | 1.120 | 1.211 | 1.131 | 1.124 |
| 96768_at   | 0.392 | 0.939 | 0.895 | 0.970 | 0.894 |
| 96770_at   | 0.390 | 0.917 | 0.861 | 0.918 | 0.903 |
| 96771_at   | 0.120 | 1.167 | 1.004 | 1.034 | 1.051 |
| 96772_at   | 0.097 | 0.963 | 1.012 | 0.963 | 1.031 |
| 96773_at   | 0.134 | 1.162 | 1.403 | 1.035 | 1.170 |
| 96774_at   | 0.233 | 1.172 | 0.993 | 0.971 | 1.141 |
| 96775_at   | 0.255 | 0.984 | 1.013 | 1.047 | 0.972 |
| 96777_at   | 0.257 | 1.306 | 1.395 | 1.065 | 1.304 |
| 96778_at   | 0.270 | 1.017 | 1.107 | 0.938 | 1.012 |
| 96779_f_at | 0.422 | 1.002 | 0.965 | 0.941 | 0.993 |
| 96780_at   | 0.175 | 0.966 | 0.909 | 0.934 | 1.000 |
| 96781_at   | 0.354 | 1.096 | 1.028 | 1.021 | 1.107 |
| 96782_at   | 0.366 | 0.843 | 0.839 | 0.927 | 0.870 |
| 96783_at   | 0.407 | 0.891 | 0.911 | 0.969 | 0.911 |



|            |       |       |       |       |       |
|------------|-------|-------|-------|-------|-------|
| 96784_at   | 0.307 | 1.164 | 1.263 | 1.173 | 1.452 |
| 96785_at   | 0.161 | 1.184 | 1.049 | 0.998 | 1.005 |
| 96786_s_at | 0.074 | 0.992 | 0.851 | 0.956 | 0.832 |
| 96787_at   | 0.377 | 0.895 | 0.878 | 0.969 | 0.905 |
| 96789_i_at | 0.425 | 0.897 | 0.877 | 0.995 | 0.881 |
| 96790_f_at | 0.249 | 0.926 | 0.922 | 1.050 | 0.981 |
| 96791_at   | 0.341 | 1.043 | 1.020 | 0.937 | 1.057 |
| 96792_at   | 0.323 | 0.946 | 0.944 | 1.008 | 0.913 |
| 96793_at   | 0.281 | 1.101 | 1.069 | 1.011 | 1.045 |
| 96794_at   | 0.209 | 1.028 | 1.022 | 0.982 | 1.044 |
| 96795_at   | 0.119 | 0.942 | 0.837 | 0.952 | 0.873 |
| 96796_f_at | 0.249 | 0.868 | 0.864 | 0.954 | 0.906 |
| 96797_s_at | 0.096 | 1.050 | 0.984 | 1.056 | 0.967 |
| 96798_r_at | 0.502 | 0.986 | 0.993 | 0.999 | 0.984 |
| 96799_at   | 0.207 | 0.966 | 1.058 | 1.094 | 0.948 |
| 96801_at   | 0.111 | 1.134 | 1.013 | 1.189 | 0.937 |
| 96802_at   | 0.235 | 1.046 | 0.975 | 0.976 | 0.962 |
| 96803_at   | 0.388 | 1.120 | 1.087 | 1.210 | 1.029 |
| 96804_at   | 0.230 | 1.013 | 0.959 | 1.039 | 0.938 |
| 96806_at   | 0.274 | 1.158 | 0.939 | 1.093 | 1.089 |
| 96807_at   | 0.497 | 0.826 | 0.825 | 0.845 | 0.825 |
| 96808_at   | 0.401 | 0.891 | 0.801 | 0.924 | 0.857 |
| 96810_at   | 0.474 | 1.093 | 1.130 | 1.064 | 1.069 |
| 96811_at   | 0.251 | 1.066 | 1.111 | 0.974 | 1.132 |
| 96812_at   | 0.151 | 1.018 | 0.980 | 1.050 | 0.946 |
| 96813_f_at | 0.377 | 1.148 | 1.078 | 1.104 | 1.160 |
| 96814_r_at | 0.130 | 0.961 | 0.835 | 0.936 | 0.890 |
| 96817_at   | 0.298 | 0.941 | 0.888 | 0.971 | 0.966 |
| 96818_at   | 0.467 | 1.031 | 0.997 | 1.014 | 0.997 |
| 96819_at   | 0.307 | 0.931 | 0.881 | 0.979 | 0.945 |
| 96822_at   | 0.293 | 1.179 | 1.227 | 1.067 | 1.120 |
| 96824_at   | 0.390 | 0.920 | 0.801 | 0.912 | 0.859 |
| 96825_at   | 0.163 | 1.186 | 0.955 | 1.158 | 0.952 |
| 96826_at   | 0.505 | 0.876 | 0.872 | 0.891 | 0.872 |
| 96827_at   | 0.288 | 0.857 | 0.874 | 0.939 | 0.824 |
| 96828_at   | 0.337 | 0.938 | 0.843 | 0.957 | 0.908 |
| 96829_at   | 0.163 | 1.319 | 1.356 | 1.081 | 1.309 |
| 96831_at   | 0.103 | 0.940 | 1.113 | 0.965 | 0.987 |
| 96832_at   | 0.286 | 1.145 | 1.211 | 0.985 | 1.153 |
| 96833_at   | 0.308 | 0.893 | 0.928 | 0.934 | 0.951 |
| 96834_at   | 0.232 | 1.257 | 1.450 | 1.131 | 1.297 |
| 96835_at   | 0.164 | 1.249 | 1.129 | 1.047 | 1.230 |
| 96836_r_at | 0.321 | 1.179 | 1.024 | 1.033 | 1.145 |
| 96837_at   | 0.286 | 1.057 | 0.973 | 1.017 | 0.994 |
| 96838_at   | 0.386 | 0.969 | 0.913 | 0.945 | 0.944 |
| 96839_at   | 0.391 | 0.842 | 0.816 | 0.882 | 0.868 |
| 96840_at   | 0.348 | 1.059 | 1.070 | 0.999 | 1.071 |

|            |       |       |       |       |       |
|------------|-------|-------|-------|-------|-------|
| 96841_at   | 0.320 | 0.936 | 1.088 | 1.014 | 0.968 |
| 96843_at   | 0.235 | 0.943 | 0.970 | 0.928 | 0.987 |
| 96845_at   | 0.271 | 1.038 | 0.970 | 1.009 | 1.050 |
| 96846_at   | 0.331 | 0.875 | 0.848 | 0.981 | 0.902 |
| 96847_at   | 0.308 | 1.090 | 1.155 | 0.962 | 1.164 |
| 96848_at   | 0.380 | 0.989 | 0.979 | 0.983 | 0.919 |
| 96849_at   | 0.456 | 1.112 | 1.103 | 1.034 | 1.073 |
| 96850_at   | 0.145 | 1.151 | 0.990 | 1.155 | 0.913 |
| 96852_at   | 0.508 | 1.064 | 1.094 | 1.012 | 1.119 |
| 96854_at   | 0.271 | 1.074 | 1.216 | 1.092 | 1.114 |
| 96855_at   | 0.297 | 1.075 | 1.114 | 1.015 | 1.019 |
| 96856_at   | 0.290 | 1.011 | 0.954 | 1.021 | 0.905 |
| 96857_at   | 0.504 | 0.811 | 0.786 | 0.851 | 0.784 |
| 96858_at   | 0.343 | 1.258 | 1.320 | 1.103 | 1.238 |
| 96859_at   | 0.369 | 1.004 | 0.993 | 1.013 | 1.004 |
| 96861_at   | 0.051 | 0.906 | 1.012 | 1.052 | 1.075 |
| 96862_at   | 0.291 | 1.213 | 1.247 | 1.031 | 1.297 |
| 96864_at   | 0.284 | 1.097 | 1.166 | 0.958 | 1.124 |
| 96865_at   | 0.337 | 1.262 | 1.412 | 0.999 | 1.369 |
| 96866_at   | 0.301 | 0.967 | 0.992 | 0.931 | 0.971 |
| 96867_at   | 0.272 | 0.873 | 0.865 | 0.987 | 0.963 |
| 96868_at   | 0.424 | 0.944 | 0.897 | 0.980 | 0.936 |
| 96869_at   | 0.198 | 1.004 | 1.175 | 1.076 | 1.068 |
| 96870_at   | 0.268 | 1.082 | 1.110 | 1.212 | 1.006 |
| 96871_at   | 0.363 | 1.054 | 1.171 | 1.073 | 1.069 |
| 96872_at   | 0.157 | 1.060 | 1.022 | 1.045 | 1.023 |
| 96873_at   | 0.284 | 0.967 | 0.887 | 0.979 | 0.949 |
| 96874_g_at | 0.322 | 1.133 | 1.183 | 1.020 | 1.105 |
| 96875_r_at | 0.331 | 1.071 | 0.919 | 0.964 | 0.962 |
| 96876_at   | 0.241 | 0.950 | 1.072 | 0.975 | 1.000 |
| 96878_at   | 0.243 | 0.903 | 1.064 | 0.946 | 1.096 |
| 96879_at   | 0.126 | 1.168 | 1.203 | 1.202 | 1.102 |
| 96881_at   | 0.273 | 1.164 | 1.235 | 1.066 | 1.322 |
| 96882_at   | 0.257 | 1.208 | 1.289 | 1.071 | 1.291 |
| 96883_at   | 0.276 | 1.048 | 1.035 | 0.961 | 1.042 |
| 96884_at   | 0.193 | 0.958 | 0.893 | 0.963 | 0.920 |
| 96885_at   | 0.505 | 1.053 | 1.070 | 1.036 | 1.057 |
| 96886_at   | 0.426 | 1.295 | 1.463 | 1.195 | 1.225 |
| 96887_at   | 0.481 | 1.142 | 1.212 | 1.085 | 1.170 |
| 96888_at   | 0.361 | 1.112 | 1.175 | 1.057 | 1.112 |
| 96890_at   | 0.452 | 1.214 | 1.181 | 1.119 | 1.252 |
| 96891_at   | 0.205 | 1.228 | 1.327 | 1.085 | 1.166 |
| 96892_at   | 0.206 | 1.005 | 1.004 | 0.888 | 1.075 |
| 96894_at   | 0.278 | 1.079 | 1.045 | 0.984 | 1.068 |
| 96895_at   | 0.021 | 0.823 | 0.439 | 0.940 | 0.659 |
| 96896_at   | 0.202 | 1.091 | 1.158 | 1.016 | 1.121 |
| 96898_at   | 0.424 | 1.080 | 1.104 | 1.051 | 1.081 |

|            |       |       |       |       |       |
|------------|-------|-------|-------|-------|-------|
| 96899_at   | 0.426 | 1.077 | 1.207 | 1.166 | 1.168 |
| 96900_at   | 0.121 | 0.962 | 1.018 | 1.028 | 0.847 |
| 96902_at   | 0.222 | 1.020 | 1.054 | 0.975 | 1.104 |
| 96904_at   | 0.245 | 1.007 | 1.006 | 0.920 | 0.964 |
| 96905_at   | 0.490 | 0.914 | 0.891 | 0.924 | 0.880 |
| 96906_at   | 0.333 | 0.945 | 0.892 | 0.944 | 0.927 |
| 96907_at   | 0.016 | 0.981 | 0.977 | 1.033 | 0.881 |
| 96908_at   | 0.480 | 0.801 | 0.727 | 0.839 | 0.771 |
| 96909_at   | 0.333 | 1.042 | 1.108 | 1.161 | 1.034 |
| 96910_at   | 0.357 | 0.796 | 0.781 | 0.882 | 0.825 |
| 96911_at   | 0.459 | 1.070 | 1.068 | 1.045 | 1.109 |
| 96912_s_at | 0.366 | 0.997 | 0.941 | 0.881 | 1.019 |
| 96913_at   | 0.444 | 1.041 | 1.074 | 1.341 | 1.059 |
| 96915_f_at | 0.388 | 1.183 | 1.252 | 1.084 | 1.166 |
| 96916_at   | 0.242 | 0.882 | 0.796 | 0.888 | 0.927 |
| 96917_at   | 0.247 | 1.054 | 1.012 | 1.037 | 1.088 |
| 96918_at   | 0.167 | 1.009 | 1.311 | 0.987 | 1.008 |
| 96919_at   | 0.095 | 1.071 | 1.236 | 1.061 | 1.077 |
| 96920_at   | 0.230 | 1.063 | 0.957 | 1.068 | 1.098 |
| 96921_at   | 0.263 | 0.974 | 0.942 | 0.922 | 0.949 |
| 96924_at   | 0.230 | 1.257 | 1.206 | 1.030 | 1.195 |
| 96925_at   | 0.494 | 1.178 | 1.235 | 1.185 | 1.230 |
| 96926_at   | 0.160 | 0.886 | 0.833 | 1.106 | 0.901 |
| 96929_at   | 0.219 | 0.911 | 0.873 | 1.010 | 0.937 |
| 96930_at   | 0.223 | 0.965 | 0.903 | 0.961 | 0.887 |
| 96931_at   | 0.458 | 0.841 | 0.840 | 0.883 | 0.852 |
| 96932_at   | 0.183 | 0.828 | 0.878 | 0.931 | 0.887 |
| 96934_at   | 0.274 | 0.988 | 1.058 | 0.993 | 0.999 |
| 96935_at   | 0.081 | 1.035 | 1.066 | 0.966 | 1.089 |
| 96936_at   | 0.130 | 1.033 | 1.178 | 1.018 | 1.062 |
| 96937_at   | 0.407 | 0.952 | 0.969 | 0.952 | 0.919 |
| 96938_at   | 0.260 | 0.852 | 0.860 | 0.945 | 0.867 |
| 96939_at   | 0.236 | 1.051 | 1.191 | 1.200 | 0.990 |
| 96940_at   | 0.348 | 0.904 | 0.840 | 0.932 | 0.851 |
| 96941_at   | 0.272 | 1.049 | 1.053 | 1.028 | 1.075 |
| 96942_at   | 0.110 | 1.055 | 1.144 | 1.030 | 1.222 |
| 96943_at   | 0.472 | 1.029 | 1.032 | 0.961 | 1.007 |
| 96945_at   | 0.325 | 1.048 | 1.115 | 0.956 | 1.106 |
| 96946_at   | 0.303 | 0.920 | 0.909 | 0.958 | 0.947 |
| 96947_at   | 0.425 | 1.059 | 1.119 | 1.034 | 1.124 |
| 96948_at   | 0.405 | 1.093 | 1.187 | 1.097 | 1.257 |
| 96949_at   | 0.412 | 1.234 | 1.183 | 1.089 | 1.195 |
| 96950_at   | 0.246 | 0.813 | 0.802 | 0.878 | 0.806 |
| 96951_at   | 0.386 | 1.144 | 1.152 | 1.113 | 1.067 |
| 96952_at   | 0.348 | 1.093 | 1.121 | 0.970 | 1.106 |
| 96953_at   | 0.291 | 1.086 | 0.968 | 0.985 | 0.950 |
| 96954_at   | 0.207 | 0.840 | 0.828 | 0.924 | 0.884 |

|            |       |       |       |       |       |
|------------|-------|-------|-------|-------|-------|
| 96955_at   | 0.355 | 0.963 | 0.970 | 1.003 | 0.937 |
| 96956_at   | 0.292 | 0.988 | 1.019 | 0.998 | 1.083 |
| 96957_at   | 0.305 | 1.013 | 0.979 | 0.960 | 0.939 |
| 96958_at   | 0.472 | 0.896 | 0.861 | 0.926 | 0.880 |
| 96959_at   | 0.334 | 1.208 | 1.301 | 1.055 | 1.217 |
| 96961_at   | 0.327 | 0.987 | 0.909 | 0.950 | 0.962 |
| 96962_at   | 0.070 | 1.096 | 1.144 | 0.984 | 1.223 |
| 96963_s_at | 0.178 | 1.000 | 1.796 | 0.820 | 0.815 |
| 96964_at   | 0.106 | 1.012 | 1.202 | 0.910 | 0.904 |
| 96965_at   | 0.409 | 0.794 | 0.749 | 0.881 | 0.780 |
| 96966_at   | 0.326 | 1.048 | 1.035 | 0.958 | 0.968 |
| 96967_at   | 0.337 | 0.883 | 0.914 | 0.938 | 0.942 |
| 96968_at   | 0.308 | 0.905 | 0.848 | 0.967 | 0.885 |
| 96969_at   | 0.318 | 0.969 | 0.955 | 1.031 | 0.940 |
| 96970_at   | 0.037 | 0.961 | 1.196 | 0.969 | 0.955 |
| 96971_f_at | 0.051 | 1.071 | 2.580 | 0.811 | 1.052 |
| 96972_f_at | 0.025 | 1.076 | 2.793 | 0.767 | 0.994 |
| 96973_f_at | 0.223 | 0.929 | 1.497 | 0.869 | 0.847 |
| 96974_at   | 0.136 | 1.180 | 2.232 | 0.933 | 1.143 |
| 96975_at   | 0.154 | 0.933 | 1.493 | 0.879 | 0.922 |
| 96976_f_at | 0.375 | 0.909 | 0.953 | 0.916 | 0.900 |
| 96977_at   | 0.264 | 0.909 | 0.815 | 0.894 | 0.870 |
| 96978_at   | 0.348 | 0.959 | 0.917 | 0.944 | 0.968 |
| 96979_at   | 0.274 | 0.982 | 0.932 | 0.946 | 0.989 |
| 96980_at   | 0.317 | 0.883 | 0.867 | 0.956 | 0.957 |
| 96981_at   | 0.285 | 0.850 | 0.807 | 0.902 | 0.882 |
| 96982_g_at | 0.288 | 0.911 | 0.870 | 0.984 | 0.877 |
| 96983_at   | 0.415 | 0.884 | 0.872 | 0.941 | 0.901 |
| 96984_at   | 0.316 | 0.865 | 0.821 | 0.911 | 0.874 |
| 96985_at   | 0.468 | 0.881 | 0.861 | 0.916 | 0.884 |
| 96986_at   | 0.302 | 0.858 | 0.796 | 0.940 | 0.862 |
| 96987_at   | 0.324 | 0.881 | 0.822 | 0.911 | 0.861 |
| 96992_r_at | 0.404 | 0.950 | 0.980 | 0.940 | 0.885 |
| 96993_at   | 0.449 | 0.924 | 0.908 | 0.943 | 0.874 |
| 96994_at   | 0.390 | 0.891 | 0.883 | 0.969 | 0.917 |
| 96995_at   | 0.475 | 0.864 | 0.841 | 0.907 | 0.851 |
| 96996_at   | 0.465 | 0.885 | 0.847 | 0.926 | 0.857 |
| 96997_at   | 0.346 | 0.960 | 0.904 | 0.936 | 0.903 |
| 96998_at   | 0.357 | 0.797 | 0.815 | 0.873 | 0.820 |
| 96999_at   | 0.352 | 0.849 | 0.838 | 0.948 | 0.865 |
| 97000_s_at | 0.432 | 0.831 | 0.806 | 0.901 | 0.821 |
| 97001_r_at | 0.389 | 0.890 | 0.864 | 0.943 | 0.858 |
| 97002_f_at | 0.486 | 0.849 | 0.844 | 0.913 | 0.841 |
| 97003_at   | 0.367 | 0.828 | 0.826 | 0.911 | 0.803 |
| 97004_at   | 0.337 | 0.870 | 0.817 | 0.924 | 0.864 |
| 97005_at   | 0.417 | 0.869 | 0.817 | 0.919 | 0.840 |
| 97006_s_at | 0.268 | 0.836 | 0.772 | 0.817 | 0.741 |

|            |       |       |       |       |       |
|------------|-------|-------|-------|-------|-------|
| 97007_at   | 0.328 | 0.898 | 0.873 | 0.999 | 0.880 |
| 97008_f_at | 0.210 | 0.926 | 1.889 | 0.913 | 0.894 |
| 97009_f_at | 0.282 | 0.860 | 1.078 | 0.893 | 0.897 |
| 97010_at   | 0.480 | 0.844 | 0.838 | 0.904 | 0.848 |
| 97012_f_at | 0.422 | 0.970 | 0.933 | 0.951 | 0.958 |
| 97013_f_at | 0.051 | 1.243 | 1.311 | 1.003 | 1.365 |
| 97017_f_at | 0.318 | 0.998 | 0.898 | 0.988 | 0.979 |
| 97048_at   | 0.379 | 0.862 | 0.893 | 0.924 | 0.890 |
| 97049_at   | 0.496 | 0.877 | 0.851 | 0.901 | 0.866 |
| 97052_at   | 0.255 | 0.776 | 0.841 | 0.954 | 0.858 |
| 97053_at   | 0.477 | 0.943 | 0.913 | 0.973 | 0.949 |
| 97054_at   | 0.305 | 0.781 | 0.788 | 0.884 | 0.834 |
| 97055_s_at | 0.211 | 0.995 | 1.001 | 0.952 | 1.076 |
| 97058_f_at | 0.341 | 1.048 | 1.026 | 0.972 | 1.040 |
| 97060_at   | 0.240 | 1.016 | 0.987 | 1.038 | 0.976 |
| 97061_g_at | 0.474 | 1.036 | 1.068 | 0.985 | 1.084 |
| 97073_at   | 0.198 | 1.039 | 1.010 | 1.031 | 0.972 |
| 97077_f_at | 0.292 | 1.071 | 1.002 | 1.024 | 1.018 |
| 97080_at   | 0.387 | 0.856 | 0.783 | 0.869 | 0.842 |
| 97082_at   | 0.274 | 0.898 | 0.894 | 0.917 | 0.945 |
| 97083_at   | 0.330 | 0.996 | 1.004 | 0.958 | 1.004 |
| 97084_at   | 0.422 | 0.884 | 0.859 | 0.924 | 0.823 |
| 97085_at   | 0.329 | 0.960 | 0.863 | 0.968 | 0.938 |
| 97086_i_at | 0.284 | 0.846 | 0.825 | 0.958 | 0.860 |
| 97087_f_at | 0.386 | 0.875 | 0.823 | 0.916 | 0.833 |
| 97088_at   | 0.309 | 0.855 | 0.772 | 0.939 | 0.787 |
| 97089_at   | 0.303 | 0.946 | 0.914 | 0.967 | 0.933 |
| 97090_at   | 0.319 | 0.995 | 1.052 | 1.030 | 1.003 |
| 97091_at   | 0.133 | 0.993 | 1.022 | 0.999 | 1.098 |
| 97092_at   | 0.361 | 0.890 | 0.844 | 0.901 | 0.922 |
| 97094_at   | 0.272 | 0.883 | 0.861 | 0.936 | 0.884 |
| 97095_at   | 0.287 | 0.937 | 0.916 | 0.893 | 0.952 |
| 97096_at   | 0.196 | 0.850 | 0.900 | 0.987 | 0.887 |
| 97097_at   | 0.322 | 0.937 | 0.907 | 0.935 | 1.009 |
| 97098_at   | 0.475 | 1.013 | 0.992 | 1.037 | 0.978 |
| 97099_at   | 0.394 | 0.819 | 0.761 | 0.863 | 0.789 |
| 97100_at   | 0.232 | 0.826 | 0.805 | 0.908 | 0.880 |
| 97101_at   | 0.418 | 0.959 | 0.880 | 0.990 | 0.957 |
| 97102_at   | 0.341 | 0.997 | 0.954 | 1.000 | 1.067 |
| 97103_at   | 0.197 | 0.783 | 0.980 | 1.042 | 1.012 |
| 97104_g_at | 0.298 | 0.873 | 1.146 | 1.106 | 1.091 |
| 97105_at   | 0.162 | 1.166 | 0.986 | 0.990 | 1.151 |
| 97106_at   | 0.323 | 1.080 | 1.071 | 1.074 | 1.158 |
| 97107_at   | 0.505 | 1.053 | 1.053 | 1.056 | 1.066 |
| 97108_at   | 0.357 | 0.961 | 0.900 | 0.938 | 0.933 |
| 97109_at   | 0.117 | 0.879 | 0.992 | 0.997 | 0.956 |
| 97110_at   | 0.429 | 1.024 | 0.983 | 0.987 | 1.082 |

|            |       |       |       |       |       |
|------------|-------|-------|-------|-------|-------|
| 97111_at   | 0.097 | 0.841 | 0.966 | 0.997 | 1.060 |
| 97112_at   | 0.266 | 1.006 | 0.962 | 1.068 | 0.952 |
| 97113_at   | 0.378 | 0.871 | 0.862 | 0.954 | 0.883 |
| 97114_at   | 0.158 | 1.188 | 1.268 | 1.069 | 1.356 |
| 97115_at   | 0.323 | 0.880 | 0.898 | 0.942 | 0.953 |
| 97116_at   | 0.449 | 0.883 | 0.905 | 0.944 | 0.873 |
| 97117_at   | 0.425 | 0.815 | 0.818 | 0.873 | 0.840 |
| 97118_at   | 0.294 | 1.176 | 1.095 | 1.042 | 1.143 |
| 97119_at   | 0.483 | 0.999 | 1.008 | 1.013 | 1.020 |
| 97120_at   | 0.379 | 0.813 | 0.842 | 0.879 | 0.824 |
| 97121_at   | 0.470 | 0.950 | 0.927 | 0.931 | 0.926 |
| 97122_at   | 0.115 | 0.875 | 0.788 | 0.946 | 0.824 |
| 97123_at   | 0.425 | 0.820 | 0.778 | 0.899 | 0.810 |
| 97124_at   | 0.323 | 0.947 | 1.060 | 0.962 | 0.943 |
| 97125_f_at | 0.096 | 1.085 | 1.189 | 1.032 | 1.046 |
| 97126_at   | 0.288 | 0.972 | 0.980 | 1.014 | 1.000 |
| 97127_f_at | 0.255 | 0.954 | 0.948 | 0.998 | 1.069 |
| 97128_at   | 0.170 | 1.038 | 0.991 | 0.978 | 0.970 |
| 97129_at   | 0.260 | 1.035 | 1.027 | 0.999 | 0.968 |
| 97130_at   | 0.261 | 0.871 | 0.895 | 0.937 | 0.992 |
| 97131_at   | 0.305 | 1.158 | 1.092 | 1.111 | 1.057 |
| 97132_at   | 0.371 | 0.857 | 0.857 | 0.939 | 0.904 |
| 97133_at   | 0.509 | 0.889 | 0.867 | 0.917 | 0.863 |
| 97134_at   | 0.295 | 0.863 | 0.774 | 0.932 | 0.844 |
| 97135_at   | 0.415 | 0.886 | 0.846 | 0.912 | 0.876 |
| 97136_at   | 0.431 | 0.989 | 0.954 | 0.986 | 1.020 |
| 97137_at   | 0.389 | 0.922 | 0.877 | 0.927 | 0.865 |
| 97138_at   | 0.440 | 0.931 | 0.876 | 0.930 | 0.919 |
| 97139_at   | 0.369 | 0.858 | 0.812 | 0.892 | 0.864 |
| 97140_at   | 0.472 | 0.948 | 0.906 | 0.958 | 0.935 |
| 97141_s_at | 0.346 | 0.903 | 0.890 | 0.995 | 0.909 |
| 97142_at   | 0.154 | 0.948 | 0.935 | 0.916 | 1.019 |
| 97143_at   | 0.387 | 0.812 | 0.766 | 0.848 | 0.808 |
| 97144_at   | 0.377 | 0.888 | 0.855 | 0.937 | 0.875 |
| 97145_at   | 0.298 | 0.861 | 0.819 | 0.907 | 0.856 |
| 97146_g_at | 0.328 | 0.933 | 0.866 | 0.935 | 0.941 |
| 97147_at   | 0.203 | 0.928 | 0.835 | 0.895 | 0.904 |
| 97148_at   | 0.348 | 0.860 | 0.842 | 0.930 | 0.906 |
| 97149_at   | 0.478 | 0.839 | 0.811 | 0.888 | 0.835 |
| 97150_at   | 0.432 | 0.954 | 0.937 | 0.970 | 0.930 |
| 97151_at   | 0.303 | 0.867 | 0.869 | 0.972 | 0.901 |
| 97152_at   | 0.288 | 0.967 | 0.921 | 1.006 | 0.983 |
| 97153_at   | 0.505 | 0.921 | 0.867 | 0.939 | 0.873 |
| 97154_f_at | 0.056 | 1.017 | 0.967 | 0.989 | 1.041 |
| 97155_at   | 0.307 | 0.868 | 0.817 | 0.892 | 0.864 |
| 97156_at   | 0.433 | 0.870 | 0.857 | 0.935 | 0.887 |
| 97157_at   | 0.240 | 0.945 | 0.940 | 0.915 | 0.916 |

|            |       |       |       |       |       |
|------------|-------|-------|-------|-------|-------|
| 97158_at   | 0.226 | 0.996 | 0.860 | 1.006 | 0.931 |
| 97159_at   | 0.344 | 0.806 | 0.875 | 0.857 | 0.820 |
| 97160_at   | 0.246 | 1.110 | 0.920 | 1.039 | 1.045 |
| 97161_at   | 0.332 | 1.016 | 0.927 | 0.936 | 0.998 |
| 97162_at   | 0.297 | 0.920 | 0.875 | 1.016 | 0.926 |
| 97163_g_at | 0.481 | 0.927 | 0.892 | 0.913 | 0.889 |
| 97164_at   | 0.098 | 1.021 | 1.154 | 0.968 | 1.134 |
| 97165_r_at | 0.266 | 0.995 | 0.934 | 0.914 | 0.957 |
| 97166_at   | 0.377 | 0.976 | 1.007 | 0.996 | 0.978 |
| 97167_g_at | 0.317 | 0.951 | 0.905 | 0.999 | 0.961 |
| 97168_at   | 0.298 | 0.863 | 0.943 | 0.928 | 0.877 |
| 97169_f_at | 0.418 | 0.894 | 0.841 | 0.940 | 0.858 |
| 97170_at   | 0.463 | 0.951 | 0.935 | 0.957 | 0.950 |
| 97171_f_at | 0.331 | 1.025 | 1.029 | 1.000 | 1.090 |
| 97172_s_at | 0.145 | 0.937 | 0.935 | 1.159 | 0.975 |
| 97173_f_at | 0.245 | 0.833 | 1.090 | 0.923 | 1.064 |
| 97174_r_at | 0.496 | 0.842 | 0.837 | 0.900 | 0.807 |
| 97175_at   | 0.287 | 0.853 | 0.876 | 0.960 | 0.907 |
| 97176_at   | 0.275 | 0.835 | 0.817 | 0.940 | 0.948 |
| 97177_at   | 0.377 | 0.946 | 0.966 | 0.930 | 0.932 |
| 97178_at   | 0.273 | 0.860 | 0.827 | 0.935 | 0.966 |
| 97179_at   | 0.494 | 0.828 | 0.820 | 0.855 | 0.834 |
| 97180_f_at | 0.426 | 0.925 | 0.944 | 0.975 | 0.892 |
| 97181_f_at | 0.256 | 0.983 | 1.250 | 0.953 | 1.284 |
| 97182_at   | 0.330 | 1.017 | 0.989 | 0.994 | 1.018 |
| 97184_at   | 0.239 | 0.878 | 0.967 | 0.976 | 0.970 |
| 97185_at   | 0.210 | 0.887 | 0.863 | 0.949 | 0.923 |
| 97186_s_at | 0.409 | 0.897 | 0.867 | 0.927 | 0.916 |
| 97187_at   | 0.483 | 0.918 | 0.910 | 0.943 | 0.924 |
| 97188_at   | 0.483 | 0.991 | 0.974 | 1.037 | 0.955 |
| 97189_at   | 0.362 | 0.981 | 0.905 | 0.932 | 0.945 |
| 97190_f_at | 0.275 | 0.881 | 0.838 | 0.929 | 0.913 |
| 97191_at   | 0.475 | 0.834 | 0.853 | 0.890 | 0.844 |
| 97192_at   | 0.325 | 0.909 | 0.834 | 0.909 | 0.898 |
| 97193_at   | 0.454 | 0.909 | 0.847 | 0.954 | 0.902 |
| 97194_at   | 0.292 | 0.887 | 0.844 | 0.934 | 0.940 |
| 97195_at   | 0.183 | 0.941 | 0.923 | 1.076 | 1.021 |
| 97196_at   | 0.309 | 0.934 | 0.980 | 0.980 | 0.958 |
| 97197_r_at | 0.069 | 0.993 | 1.302 | 1.163 | 1.049 |
| 97198_at   | 0.133 | 0.828 | 0.838 | 1.067 | 1.027 |
| 97199_at   | 0.478 | 1.054 | 1.046 | 1.058 | 1.067 |
| 97200_f_at | 0.035 | 1.260 | 1.453 | 1.020 | 1.325 |
| 97201_s_at | 0.478 | 1.207 | 1.199 | 1.078 | 1.193 |
| 97203_at   | 0.461 | 1.062 | 1.126 | 1.047 | 1.144 |
| 97204_s_at | 0.377 | 1.104 | 1.055 | 1.222 | 1.056 |
| 97205_at   | 0.335 | 1.292 | 1.406 | 1.037 | 1.367 |
| 97206_at   | 0.270 | 1.250 | 1.171 | 1.195 | 1.159 |

|            |       |       |       |       |       |
|------------|-------|-------|-------|-------|-------|
| 97207_f_at | 0.097 | 1.291 | 1.318 | 0.958 | 1.294 |
| 97208_at   | 0.163 | 0.896 | 0.882 | 0.920 | 0.948 |
| 97210_at   | 0.314 | 0.877 | 0.845 | 1.087 | 0.860 |
| 97211_at   | 0.321 | 1.202 | 1.197 | 1.049 | 1.172 |
| 97213_at   | 0.161 | 0.867 | 0.867 | 1.017 | 0.874 |
| 97216_at   | 0.121 | 0.853 | 0.828 | 0.978 | 0.877 |
| 97217_at   | 0.481 | 1.166 | 1.154 | 1.115 | 1.190 |
| 97220_at   | 0.377 | 1.017 | 1.090 | 1.053 | 1.047 |
| 97222_at   | 0.308 | 0.941 | 0.951 | 1.012 | 0.973 |
| 97224_at   | 0.174 | 1.014 | 0.884 | 1.002 | 1.005 |
| 97226_at   | 0.368 | 1.132 | 1.080 | 1.076 | 1.053 |
| 97227_at   | 0.234 | 0.778 | 0.956 | 1.021 | 0.992 |
| 97228_at   | 0.389 | 1.021 | 1.011 | 0.993 | 0.982 |
| 97229_at   | 0.058 | 1.019 | 1.104 | 0.931 | 1.239 |
| 97232_at   | 0.434 | 0.950 | 0.870 | 0.930 | 0.896 |
| 97234_at   | 0.366 | 0.872 | 0.798 | 0.895 | 0.856 |
| 97235_f_at | 0.424 | 1.009 | 0.971 | 1.286 | 0.958 |
| 97236_r_at | 0.449 | 0.814 | 0.711 | 0.845 | 0.770 |
| 97237_at   | 0.359 | 1.081 | 1.230 | 1.055 | 1.112 |
| 97238_at   | 0.073 | 1.041 | 1.132 | 1.012 | 1.154 |
| 97239_at   | 0.371 | 1.080 | 1.049 | 1.047 | 1.155 |
| 97240_g_at | 0.035 | 1.143 | 1.215 | 0.996 | 1.175 |
| 97241_at   | 0.434 | 1.113 | 1.137 | 1.040 | 1.101 |
| 97242_at   | 0.384 | 0.970 | 1.018 | 0.961 | 0.982 |
| 97243_at   | 0.088 | 1.078 | 1.026 | 1.057 | 0.997 |
| 97247_at   | 0.477 | 1.141 | 1.133 | 1.060 | 1.176 |
| 97248_at   | 0.323 | 0.919 | 1.078 | 1.189 | 1.039 |
| 97249_at   | 0.401 | 1.022 | 0.994 | 0.977 | 1.009 |
| 97250_at   | 0.428 | 0.963 | 0.981 | 0.964 | 1.020 |
| 97251_at   | 0.282 | 0.965 | 1.041 | 0.897 | 0.995 |
| 97252_at   | 0.327 | 0.888 | 0.933 | 0.954 | 0.916 |
| 97253_at   | 0.358 | 1.078 | 1.029 | 0.979 | 1.086 |
| 97254_at   | 0.188 | 1.173 | 1.235 | 1.022 | 1.259 |
| 97255_at   | 0.460 | 1.304 | 1.264 | 1.140 | 1.401 |
| 97256_at   | 0.459 | 0.799 | 0.776 | 0.852 | 0.791 |
| 97257_at   | 0.402 | 0.970 | 0.985 | 1.022 | 0.982 |
| 97258_at   | 0.184 | 0.858 | 0.898 | 0.949 | 0.915 |
| 97259_at   | 0.307 | 0.896 | 1.015 | 0.980 | 1.044 |
| 97260_at   | 0.323 | 1.042 | 1.045 | 1.006 | 1.152 |
| 97261_at   | 0.436 | 1.060 | 0.930 | 0.988 | 1.002 |
| 97262_at   | 0.391 | 1.198 | 1.199 | 1.090 | 1.190 |
| 97263_s_at | 0.154 | 0.848 | 0.971 | 0.905 | 1.056 |
| 97264_r_at | 0.188 | 0.797 | 0.856 | 0.932 | 0.881 |
| 97265_at   | 0.397 | 0.962 | 0.998 | 1.044 | 1.005 |
| 97267_at   | 0.248 | 0.917 | 0.900 | 0.940 | 0.968 |
| 97268_i_at | 0.260 | 0.845 | 1.025 | 0.885 | 0.932 |
| 97269_f_at | 0.117 | 1.076 | 1.255 | 0.976 | 1.096 |



|            |       |       |       |       |       |
|------------|-------|-------|-------|-------|-------|
| 97270_at   | 0.081 | 0.905 | 0.828 | 0.980 | 0.849 |
| 97271_at   | 0.195 | 0.883 | 0.939 | 0.859 | 0.986 |
| 97272_at   | 0.154 | 0.929 | 1.062 | 1.009 | 1.019 |
| 97273_at   | 0.112 | 1.202 | 1.158 | 1.093 | 0.916 |
| 97274_at   | 0.205 | 1.080 | 1.266 | 0.975 | 1.103 |
| 97276_at   | 0.187 | 0.961 | 0.977 | 0.923 | 0.912 |
| 97277_at   | 0.345 | 1.085 | 1.096 | 0.998 | 1.184 |
| 97278_at   | 0.069 | 0.900 | 0.839 | 0.952 | 0.824 |
| 97279_at   | 0.110 | 1.076 | 1.310 | 1.216 | 1.066 |
| 97281_at   | 0.327 | 0.982 | 0.965 | 1.047 | 0.988 |
| 97282_at   | 0.274 | 0.834 | 0.894 | 0.925 | 0.912 |
| 97283_at   | 0.243 | 1.009 | 0.941 | 0.948 | 0.976 |
| 97284_at   | 0.322 | 0.917 | 0.924 | 0.945 | 0.950 |
| 97285_f_at | 0.055 | 1.136 | 1.008 | 0.943 | 1.126 |
| 97287_at   | 0.345 | 0.958 | 0.851 | 0.907 | 0.900 |
| 97288_at   | 0.408 | 0.980 | 0.959 | 1.037 | 0.996 |
| 97292_at   | 0.290 | 1.270 | 1.271 | 1.039 | 1.283 |
| 97293_at   | 0.174 | 1.068 | 0.966 | 1.012 | 0.966 |
| 97295_at   | 0.096 | 0.984 | 1.090 | 0.988 | 1.157 |
| 97296_at   | 0.305 | 1.152 | 1.113 | 0.995 | 1.076 |
| 97297_at   | 0.139 | 1.137 | 1.030 | 1.182 | 0.988 |
| 97300_at   | 0.478 | 0.914 | 0.890 | 0.927 | 0.905 |
| 97301_at   | 0.261 | 1.331 | 1.274 | 1.108 | 1.276 |
| 97302_at   | 0.459 | 1.285 | 1.267 | 1.100 | 1.388 |
| 97304_at   | 0.474 | 1.206 | 1.191 | 1.127 | 1.216 |
| 97305_at   | 0.188 | 1.035 | 1.035 | 0.928 | 1.074 |
| 97307_f_at | 0.364 | 1.098 | 1.192 | 1.039 | 1.144 |
| 97308_at   | 0.122 | 0.992 | 1.053 | 1.010 | 1.082 |
| 97309_at   | 0.220 | 0.941 | 0.855 | 0.999 | 0.896 |
| 97310_at   | 0.298 | 0.842 | 0.827 | 0.964 | 0.872 |
| 97311_at   | 0.209 | 1.074 | 1.116 | 0.986 | 1.101 |
| 97312_at   | 0.448 | 1.219 | 1.339 | 1.118 | 1.312 |
| 97313_at   | 0.125 | 1.150 | 1.036 | 1.025 | 1.006 |
| 97315_at   | 0.243 | 1.122 | 1.174 | 1.009 | 1.233 |
| 97316_at   | 0.230 | 1.046 | 1.022 | 1.171 | 0.987 |
| 97317_at   | 0.303 | 1.151 | 1.102 | 1.136 | 1.022 |
| 97318_at   | 0.134 | 1.056 | 0.945 | 0.935 | 1.084 |
| 97319_at   | 0.350 | 0.934 | 0.924 | 0.982 | 0.914 |
| 97320_at   | 0.309 | 1.157 | 1.065 | 1.114 | 1.142 |
| 97322_at   | 0.136 | 1.047 | 1.091 | 0.942 | 1.097 |
| 97324_at   | 0.035 | 1.062 | 1.056 | 0.940 | 1.093 |
| 97325_at   | 0.217 | 1.038 | 1.029 | 0.978 | 0.929 |
| 97327_at   | 0.022 | 1.157 | 1.443 | 0.992 | 1.293 |
| 97328_at   | 0.181 | 0.835 | 0.797 | 0.921 | 0.830 |
| 97329_at   | 0.312 | 1.147 | 1.121 | 1.022 | 1.127 |
| 97330_at   | 0.187 | 1.194 | 1.147 | 1.042 | 1.131 |
| 97331_at   | 0.220 | 0.897 | 0.873 | 0.970 | 0.898 |

|            |       |       |       |       |       |
|------------|-------|-------|-------|-------|-------|
| 97332_at   | 0.353 | 0.989 | 1.008 | 0.985 | 1.029 |
| 97333_at   | 0.139 | 1.428 | 1.272 | 1.144 | 1.212 |
| 97334_at   | 0.240 | 1.225 | 1.323 | 1.248 | 1.170 |
| 97335_at   | 0.334 | 0.937 | 0.927 | 1.011 | 0.948 |
| 97336_at   | 0.288 | 1.176 | 1.112 | 1.086 | 1.191 |
| 97338_at   | 0.440 | 0.915 | 0.886 | 0.985 | 0.905 |
| 97339_at   | 0.101 | 1.004 | 0.907 | 1.033 | 0.900 |
| 97340_at   | 0.428 | 0.986 | 0.946 | 0.976 | 0.956 |
| 97341_at   | 0.288 | 0.987 | 1.019 | 0.999 | 0.927 |
| 97342_at   | 0.444 | 1.021 | 1.062 | 1.015 | 1.079 |
| 97343_at   | 0.207 | 1.160 | 1.108 | 1.039 | 1.091 |
| 97345_at   | 0.206 | 0.981 | 1.029 | 0.973 | 1.126 |
| 97346_at   | 0.323 | 1.024 | 1.028 | 0.995 | 1.094 |
| 97347_at   | 0.051 | 1.140 | 0.842 | 1.202 | 0.867 |
| 97349_at   | 0.323 | 1.222 | 1.057 | 1.088 | 1.215 |
| 97351_i_at | 0.384 | 1.067 | 1.004 | 1.032 | 1.083 |
| 97352_f_at | 0.187 | 1.124 | 1.013 | 1.049 | 1.108 |
| 97353_at   | 0.240 | 1.159 | 1.028 | 1.080 | 0.991 |
| 97354_at   | 0.251 | 1.072 | 1.002 | 1.020 | 0.976 |
| 97355_at   | 0.261 | 0.991 | 1.015 | 0.976 | 1.018 |
| 97356_at   | 0.062 | 1.001 | 1.047 | 0.900 | 1.007 |
| 97357_at   | 0.400 | 0.983 | 1.058 | 1.014 | 0.968 |
| 97358_at   | 0.224 | 0.994 | 0.858 | 1.034 | 0.942 |
| 97359_at   | 0.333 | 0.981 | 1.037 | 0.977 | 1.016 |
| 97360_at   | 0.171 | 1.007 | 1.102 | 0.955 | 1.153 |
| 97363_at   | 0.154 | 1.226 | 1.069 | 1.061 | 1.131 |
| 97364_at   | 0.278 | 0.925 | 0.964 | 0.965 | 0.937 |
| 97365_at   | 0.257 | 0.999 | 0.878 | 1.014 | 0.887 |
| 97366_at   | 0.194 | 1.202 | 1.102 | 1.073 | 1.077 |
| 97367_at   | 0.309 | 1.027 | 0.965 | 1.086 | 1.031 |
| 97368_at   | 0.353 | 0.847 | 0.835 | 0.921 | 0.865 |
| 97369_g_at | 0.276 | 0.857 | 0.924 | 1.000 | 0.899 |
| 97370_at   | 0.183 | 0.966 | 0.902 | 0.976 | 0.985 |
| 97371_at   | 0.411 | 0.833 | 0.770 | 0.831 | 0.837 |
| 97372_at   | 0.353 | 0.943 | 0.884 | 0.960 | 0.936 |
| 97373_at   | 0.477 | 0.876 | 0.884 | 0.932 | 0.843 |
| 97374_at   | 0.051 | 0.935 | 0.960 | 0.874 | 1.075 |
| 97375_at   | 0.270 | 1.128 | 0.992 | 1.020 | 0.979 |
| 97377_at   | 0.349 | 1.017 | 0.993 | 1.014 | 0.976 |
| 97379_at   | 0.056 | 0.935 | 0.858 | 0.937 | 1.117 |
| 97380_at   | 0.499 | 1.085 | 1.132 | 1.038 | 1.125 |
| 97381_s_at | 0.500 | 0.937 | 0.905 | 0.969 | 0.915 |
| 97382_at   | 0.409 | 0.957 | 0.974 | 0.976 | 0.959 |
| 97383_at   | 0.035 | 1.155 | 0.965 | 1.039 | 1.159 |
| 97384_at   | 0.167 | 0.982 | 1.076 | 0.906 | 1.110 |
| 97385_at   | 0.064 | 1.033 | 1.023 | 0.988 | 1.114 |
| 97386_at   | 0.248 | 1.029 | 0.951 | 1.085 | 0.948 |

|            |       |       |       |       |       |
|------------|-------|-------|-------|-------|-------|
| 97387_at   | 0.124 | 1.076 | 1.014 | 1.084 | 0.951 |
| 97389_at   | 0.341 | 0.883 | 0.848 | 0.909 | 0.889 |
| 97390_at   | 0.333 | 1.047 | 0.965 | 1.002 | 0.970 |
| 97391_at   | 0.379 | 0.831 | 0.829 | 0.891 | 0.877 |
| 97392_at   | 0.243 | 0.975 | 0.942 | 1.021 | 1.006 |
| 97393_at   | 0.056 | 0.972 | 1.046 | 0.905 | 1.044 |
| 97394_at   | 0.314 | 1.030 | 1.038 | 0.958 | 1.163 |
| 97395_at   | 0.314 | 0.927 | 0.975 | 1.025 | 0.964 |
| 97397_at   | 0.367 | 0.946 | 0.902 | 1.002 | 0.969 |
| 97398_at   | 0.195 | 1.087 | 1.186 | 1.069 | 1.131 |
| 97400_at   | 0.048 | 0.965 | 1.020 | 1.060 | 0.924 |
| 97401_at   | 0.331 | 0.988 | 0.985 | 0.979 | 1.046 |
| 97402_at   | 0.143 | 0.968 | 0.860 | 0.917 | 0.942 |
| 97403_at   | 0.184 | 0.928 | 0.966 | 0.973 | 0.999 |
| 97404_at   | 0.165 | 0.945 | 1.040 | 1.086 | 0.973 |
| 97405_at   | 0.413 | 0.985 | 1.024 | 0.993 | 0.999 |
| 97406_at   | 0.434 | 1.133 | 1.051 | 1.071 | 1.101 |
| 97407_at   | 0.236 | 1.045 | 1.008 | 0.951 | 1.010 |
| 97409_at   | 0.328 | 0.969 | 1.111 | 0.976 | 1.012 |
| 97410_at   | 0.336 | 0.943 | 0.981 | 1.037 | 0.966 |
| 97411_at   | 0.082 | 1.164 | 1.263 | 1.036 | 1.443 |
| 97412_at   | 0.056 | 1.015 | 1.054 | 0.913 | 1.033 |
| 97413_at   | 0.419 | 1.329 | 1.226 | 1.170 | 1.341 |
| 97414_at   | 0.478 | 0.983 | 0.983 | 0.974 | 0.958 |
| 97415_at   | 0.282 | 1.130 | 1.237 | 1.136 | 1.094 |
| 97418_at   | 0.364 | 0.912 | 0.888 | 0.936 | 0.922 |
| 97419_at   | 0.106 | 0.977 | 1.047 | 0.943 | 1.042 |
| 97420_at   | 0.226 | 1.197 | 1.406 | 1.217 | 1.587 |
| 97421_at   | 0.212 | 1.256 | 1.374 | 1.056 | 1.618 |
| 97422_at   | 0.504 | 1.100 | 1.095 | 1.067 | 1.104 |
| 97423_at   | 0.273 | 1.136 | 1.093 | 1.005 | 1.108 |
| 97424_at   | 0.352 | 1.049 | 1.262 | 1.200 | 1.135 |
| 97425_at   | 0.163 | 1.210 | 1.191 | 1.092 | 1.134 |
| 97426_at   | 0.166 | 1.185 | 1.100 | 1.060 | 1.236 |
| 97427_at   | 0.459 | 0.899 | 0.857 | 0.922 | 0.866 |
| 97428_at   | 0.199 | 1.000 | 0.945 | 1.027 | 0.946 |
| 97429_at   | 0.275 | 1.222 | 1.043 | 0.980 | 1.206 |
| 97430_at   | 0.499 | 0.958 | 0.963 | 0.947 | 0.957 |
| 97431_at   | 0.302 | 0.917 | 0.870 | 1.018 | 0.926 |
| 97433_at   | 0.151 | 1.078 | 0.979 | 0.954 | 0.953 |
| 97434_at   | 0.307 | 1.165 | 1.087 | 1.093 | 1.229 |
| 97435_at   | 0.357 | 0.871 | 0.878 | 0.943 | 0.926 |
| 97436_at   | 0.350 | 0.897 | 0.884 | 0.960 | 0.891 |
| 97437_f_at | 0.428 | 1.070 | 1.077 | 0.998 | 1.115 |
| 97438_r_at | 0.314 | 1.104 | 1.088 | 1.057 | 1.046 |
| 97441_at   | 0.163 | 1.166 | 1.102 | 1.011 | 1.016 |
| 97442_at   | 0.106 | 1.274 | 1.307 | 0.980 | 1.258 |

|            |       |       |       |       |       |
|------------|-------|-------|-------|-------|-------|
| 97443_at   | 0.248 | 1.075 | 1.160 | 0.963 | 1.070 |
| 97444_at   | 0.049 | 1.061 | 1.704 | 0.897 | 1.185 |
| 97445_at   | 0.255 | 1.369 | 1.215 | 1.021 | 1.184 |
| 97446_at   | 0.212 | 1.182 | 1.063 | 1.071 | 1.033 |
| 97447_at   | 0.158 | 0.986 | 1.072 | 1.077 | 0.938 |
| 97448_at   | 0.407 | 1.167 | 1.141 | 1.073 | 1.118 |
| 97449_at   | 0.432 | 1.045 | 1.030 | 1.064 | 1.047 |
| 97450_s_at | 0.276 | 1.147 | 1.153 | 1.049 | 1.165 |
| 97451_at   | 0.382 | 1.133 | 1.076 | 1.024 | 1.088 |
| 97452_at   | 0.280 | 1.066 | 1.095 | 1.066 | 1.009 |
| 97456_at   | 0.328 | 1.192 | 1.182 | 1.046 | 1.172 |
| 97458_at   | 0.142 | 1.206 | 1.119 | 1.052 | 1.104 |
| 97459_at   | 0.255 | 0.966 | 1.044 | 0.863 | 1.093 |
| 97460_at   | 0.223 | 1.234 | 1.152 | 1.070 | 1.090 |
| 97462_at   | 0.223 | 0.883 | 1.069 | 1.048 | 1.054 |
| 97463_g_at | 0.396 | 1.043 | 1.146 | 1.062 | 1.160 |
| 97464_at   | 0.415 | 1.219 | 1.172 | 1.118 | 1.230 |
| 97465_at   | 0.388 | 0.899 | 0.875 | 0.939 | 0.867 |
| 97468_at   | 0.072 | 1.075 | 1.338 | 1.025 | 1.228 |
| 97469_at   | 0.212 | 0.856 | 0.748 | 0.865 | 0.795 |
| 97470_at   | 0.235 | 0.851 | 0.858 | 0.933 | 0.864 |
| 97471_at   | 0.179 | 1.076 | 1.092 | 1.169 | 1.043 |
| 97472_at   | 0.255 | 1.068 | 1.019 | 1.057 | 0.989 |
| 97473_at   | 0.326 | 1.256 | 1.241 | 1.032 | 1.097 |
| 97474_r_at | 0.456 | 0.987 | 0.964 | 0.973 | 0.953 |
| 97475_at   | 0.298 | 0.905 | 0.954 | 0.895 | 0.923 |
| 97477_at   | 0.199 | 0.921 | 1.013 | 0.922 | 1.094 |
| 97478_at   | 0.320 | 1.097 | 0.982 | 1.040 | 1.015 |
| 97479_at   | 0.384 | 0.989 | 1.004 | 1.020 | 1.013 |
| 97480_f_at | 0.035 | 1.003 | 0.975 | 1.013 | 0.918 |
| 97481_r_at | 0.510 | 0.789 | 0.745 | 0.824 | 0.728 |
| 97482_at   | 0.427 | 0.913 | 0.904 | 0.987 | 0.924 |
| 97483_at   | 0.202 | 0.926 | 0.999 | 0.897 | 0.956 |
| 97484_at   | 0.184 | 1.257 | 1.115 | 1.067 | 1.044 |
| 97485_at   | 0.387 | 1.212 | 1.220 | 1.159 | 1.360 |
| 97486_at   | 0.244 | 1.103 | 1.210 | 1.027 | 1.109 |
| 97487_at   | 0.340 | 1.453 | 1.431 | 1.166 | 1.435 |
| 97488_at   | 0.328 | 0.960 | 0.924 | 1.010 | 0.958 |
| 97489_at   | 0.310 | 1.205 | 1.303 | 1.164 | 1.162 |
| 97490_at   | 0.315 | 0.980 | 0.934 | 0.913 | 0.992 |
| 97491_at   | 0.385 | 1.322 | 1.398 | 1.155 | 1.545 |
| 97492_at   | 0.281 | 0.926 | 1.003 | 0.904 | 0.914 |
| 97496_f_at | 0.483 | 1.117 | 1.103 | 1.091 | 1.109 |
| 97497_at   | 0.185 | 1.405 | 1.072 | 1.138 | 1.118 |
| 97498_at   | 0.272 | 1.093 | 1.030 | 1.048 | 1.077 |
| 97499_at   | 0.188 | 0.899 | 0.803 | 0.913 | 0.845 |
| 97500_g_at | 0.212 | 0.822 | 0.968 | 1.082 | 1.014 |

|            |       |       |       |       |       |
|------------|-------|-------|-------|-------|-------|
| 97502_at   | 0.324 | 1.159 | 1.215 | 1.252 | 1.171 |
| 97504_at   | 0.056 | 0.859 | 0.876 | 0.863 | 0.972 |
| 97505_at   | 0.230 | 1.087 | 1.184 | 1.015 | 1.148 |
| 97506_at   | 0.337 | 0.946 | 0.984 | 0.967 | 1.027 |
| 97507_at   | 0.410 | 1.228 | 1.249 | 1.231 | 1.143 |
| 97508_at   | 0.304 | 0.875 | 0.755 | 0.883 | 0.836 |
| 97509_f_at | 0.332 | 1.017 | 1.031 | 1.044 | 0.928 |
| 97510_at   | 0.270 | 0.850 | 0.736 | 0.849 | 0.802 |
| 97511_at   | 0.238 | 1.224 | 1.109 | 1.208 | 1.106 |
| 97512_at   | 0.452 | 1.081 | 1.132 | 1.015 | 1.143 |
| 97514_at   | 0.391 | 1.062 | 0.968 | 1.016 | 1.063 |
| 97515_at   | 0.210 | 1.071 | 1.185 | 1.004 | 1.075 |
| 97516_at   | 0.481 | 0.992 | 1.039 | 0.995 | 1.064 |
| 97517_at   | 0.125 | 0.901 | 0.983 | 1.003 | 0.985 |
| 97518_at   | 0.204 | 1.040 | 1.119 | 1.105 | 0.988 |
| 97519_at   | 0.165 | 1.256 | 1.927 | 1.228 | 1.845 |
| 97520_s_at | 0.280 | 0.916 | 0.869 | 0.976 | 0.969 |
| 97521_at   | 0.401 | 0.914 | 0.876 | 0.917 | 0.921 |
| 97523_i_at | 0.412 | 0.973 | 0.946 | 0.990 | 1.000 |
| 97524_f_at | 0.264 | 0.888 | 0.871 | 0.973 | 0.966 |
| 97525_at   | 0.388 | 1.057 | 1.035 | 1.098 | 1.118 |
| 97526_at   | 0.483 | 0.979 | 0.997 | 0.988 | 0.993 |
| 97527_at   | 0.025 | 1.271 | 1.703 | 1.183 | 1.822 |
| 97528_at   | 0.474 | 1.085 | 1.130 | 1.043 | 1.124 |
| 97529_at   | 0.114 | 1.213 | 1.293 | 1.161 | 0.941 |
| 97530_at   | 0.334 | 1.018 | 1.017 | 0.981 | 1.041 |
| 97531_at   | 0.314 | 0.905 | 0.829 | 0.934 | 0.893 |
| 97532_at   | 0.264 | 1.045 | 1.098 | 1.051 | 1.082 |
| 97533_at   | 0.250 | 0.991 | 1.052 | 1.005 | 0.995 |
| 97535_at   | 0.250 | 1.307 | 1.286 | 1.091 | 1.382 |
| 97536_at   | 0.238 | 1.066 | 0.947 | 1.067 | 0.930 |
| 97538_at   | 0.095 | 1.200 | 1.615 | 1.218 | 1.446 |
| 97539_at   | 0.210 | 0.987 | 1.003 | 1.053 | 1.050 |
| 97540_f_at | 0.119 | 1.049 | 1.180 | 1.065 | 1.034 |
| 97541_f_at | 0.188 | 1.329 | 1.529 | 1.114 | 1.446 |
| 97542_at   | 0.456 | 0.900 | 0.870 | 0.936 | 0.877 |
| 97543_at   | 0.348 | 1.191 | 1.192 | 1.076 | 1.265 |
| 97544_at   | 0.340 | 1.158 | 1.129 | 1.086 | 1.085 |
| 97546_at   | 0.502 | 0.981 | 0.950 | 0.987 | 0.964 |
| 97548_at   | 0.230 | 1.016 | 0.946 | 0.963 | 1.030 |
| 97549_at   | 0.187 | 1.061 | 0.999 | 1.076 | 1.130 |
| 97550_at   | 0.051 | 1.037 | 0.939 | 1.006 | 0.893 |
| 97551_at   | 0.261 | 1.128 | 1.035 | 1.015 | 1.047 |
| 97553_at   | 0.422 | 1.120 | 1.059 | 1.087 | 1.130 |
| 97554_at   | 0.271 | 1.179 | 1.131 | 1.010 | 1.143 |
| 97555_at   | 0.410 | 0.833 | 0.808 | 0.882 | 0.835 |
| 97556_at   | 0.287 | 1.296 | 1.208 | 1.037 | 1.202 |

|            |       |       |       |       |       |
|------------|-------|-------|-------|-------|-------|
| 97557_at   | 0.147 | 0.967 | 1.023 | 0.961 | 0.970 |
| 97559_at   | 0.348 | 1.104 | 1.162 | 1.111 | 1.186 |
| 97560_at   | 0.120 | 0.643 | 0.864 | 0.960 | 1.010 |
| 97561_at   | 0.481 | 0.805 | 0.797 | 0.846 | 0.772 |
| 97562_r_at | 0.500 | 0.743 | 0.701 | 0.787 | 0.725 |
| 97563_f_at | 0.128 | 0.927 | 2.096 | 0.827 | 0.912 |
| 97564_f_at | 0.056 | 1.069 | 2.488 | 0.901 | 1.004 |
| 97565_r_at | 0.290 | 0.887 | 0.884 | 0.967 | 0.899 |
| 97566_f_at | 0.022 | 1.119 | 2.834 | 0.808 | 1.051 |
| 97567_f_at | 0.035 | 1.054 | 2.787 | 0.810 | 0.988 |
| 97568_at   | 0.387 | 0.990 | 0.917 | 1.029 | 0.958 |
| 97569_at   | 0.273 | 0.886 | 0.946 | 0.974 | 0.905 |
| 97570_at   | 0.444 | 0.893 | 0.915 | 0.929 | 0.919 |
| 97571_r_at | 0.497 | 0.775 | 0.763 | 0.847 | 0.755 |
| 97572_at   | 0.316 | 0.934 | 0.917 | 1.042 | 0.961 |
| 97573_at   | 0.279 | 0.841 | 0.798 | 0.917 | 0.867 |
| 97574_f_at | 0.151 | 0.822 | 2.248 | 0.771 | 0.809 |
| 97575_f_at | 0.182 | 0.883 | 1.518 | 0.891 | 0.923 |
| 97576_f_at | 0.180 | 0.913 | 1.645 | 0.870 | 0.849 |
| 97577_f_at | 0.180 | 0.917 | 1.315 | 0.860 | 0.882 |
| 97578_at   | 0.425 | 0.965 | 0.890 | 0.959 | 0.914 |
| 97579_f_at | 0.408 | 0.847 | 0.796 | 0.896 | 0.830 |
| 97580_at   | 0.410 | 0.919 | 0.892 | 0.937 | 0.930 |
| 97581_at   | 0.278 | 0.906 | 0.816 | 0.931 | 0.879 |
| 97593_f_at | 0.204 | 1.197 | 1.089 | 1.119 | 1.053 |
| 97594_r_at | 0.108 | 1.127 | 1.071 | 1.043 | 1.020 |
| 97598_at   | 0.497 | 0.971 | 0.967 | 0.980 | 0.941 |
| 97601_f_at | 0.328 | 0.862 | 0.799 | 0.896 | 0.781 |
| 97610_f_at | 0.490 | 0.896 | 0.883 | 0.906 | 0.863 |
| 97645_f_at | 0.240 | 0.920 | 0.909 | 0.969 | 1.001 |
| 97647_at   | 0.034 | 0.971 | 1.036 | 0.858 | 1.120 |
| 97651_at   | 0.350 | 0.955 | 0.970 | 0.968 | 0.903 |
| 97652_at   | 0.272 | 0.897 | 0.887 | 0.977 | 0.917 |
| 97653_at   | 0.497 | 0.868 | 0.838 | 0.887 | 0.860 |
| 97654_at   | 0.236 | 0.959 | 0.950 | 1.001 | 0.849 |
| 97655_at   | 0.456 | 0.833 | 0.825 | 0.872 | 0.841 |
| 97658_f_at | 0.379 | 0.842 | 0.808 | 0.938 | 0.866 |
| 97659_r_at | 0.308 | 0.871 | 0.832 | 0.964 | 0.880 |
| 97660_s_at | 0.403 | 0.839 | 0.814 | 0.923 | 0.833 |
| 97661_at   | 0.297 | 0.914 | 0.852 | 0.941 | 0.892 |
| 97665_i_at | 0.366 | 0.983 | 0.917 | 0.966 | 0.910 |
| 97666_r_at | 0.330 | 1.028 | 0.970 | 0.975 | 0.949 |
| 97667_at   | 0.502 | 0.917 | 0.907 | 0.935 | 0.913 |
| 97678_r_at | 0.441 | 0.945 | 0.936 | 0.981 | 0.949 |
| 97679_at   | 0.478 | 0.834 | 0.808 | 0.893 | 0.838 |
| 97680_at   | 0.156 | 0.853 | 0.810 | 0.973 | 0.860 |
| 97681_f_at | 0.022 | 0.962 | 0.813 | 1.012 | 0.877 |

|            |       |       |       |       |       |
|------------|-------|-------|-------|-------|-------|
| 97682_r_at | 0.415 | 0.907 | 0.898 | 0.983 | 0.883 |
| 97683_at   | 0.367 | 0.876 | 0.804 | 0.871 | 0.871 |
| 97684_at   | 0.318 | 1.009 | 0.968 | 1.023 | 0.951 |
| 97685_at   | 0.258 | 0.868 | 0.802 | 0.863 | 0.880 |
| 97686_r_at | 0.402 | 0.841 | 0.803 | 0.931 | 0.840 |
| 97687_at   | 0.407 | 0.854 | 0.852 | 0.938 | 0.866 |
| 97688_at   | 0.403 | 1.017 | 0.979 | 1.011 | 1.016 |
| 97689_at   | 0.257 | 1.085 | 1.287 | 1.194 | 1.061 |
| 97690_at   | 0.159 | 1.036 | 1.005 | 0.964 | 1.067 |
| 97691_at   | 0.349 | 0.902 | 0.890 | 0.993 | 0.867 |
| 97692_at   | 0.196 | 1.000 | 0.945 | 0.975 | 0.984 |
| 97693_at   | 0.332 | 0.868 | 0.859 | 0.954 | 0.855 |
| 97694_at   | 0.459 | 0.843 | 0.840 | 0.895 | 0.862 |
| 97695_s_at | 0.195 | 1.092 | 1.110 | 0.962 | 1.132 |
| 97696_r_at | 0.335 | 1.041 | 1.023 | 0.934 | 1.006 |
| 97697_at   | 0.179 | 0.867 | 0.873 | 0.954 | 0.820 |
| 97698_at   | 0.332 | 0.883 | 0.858 | 0.979 | 0.887 |
| 97699_at   | 0.150 | 0.760 | 0.757 | 0.964 | 0.820 |
| 97700_at   | 0.428 | 1.101 | 1.053 | 1.033 | 1.052 |
| 97701_at   | 0.312 | 0.861 | 0.863 | 0.876 | 0.902 |
| 97702_at   | 0.441 | 0.817 | 0.839 | 0.879 | 0.861 |
| 97703_at   | 0.136 | 0.916 | 0.906 | 0.958 | 0.982 |
| 97704_at   | 0.105 | 0.832 | 0.879 | 0.956 | 0.911 |
| 97705_at   | 0.271 | 0.915 | 0.985 | 0.953 | 0.986 |
| 97706_at   | 0.137 | 0.868 | 0.874 | 0.977 | 0.913 |
| 97707_at   | 0.271 | 0.941 | 0.903 | 0.979 | 0.999 |
| 97708_at   | 0.205 | 0.943 | 0.976 | 0.920 | 0.973 |
| 97709_at   | 0.461 | 0.964 | 0.965 | 0.968 | 0.976 |
| 97710_f_at | 0.364 | 1.037 | 1.017 | 1.018 | 0.980 |
| 97711_at   | 0.232 | 0.718 | 0.793 | 0.864 | 0.899 |
| 97712_at   | 0.318 | 0.936 | 0.938 | 0.928 | 0.978 |
| 97713_at   | 0.419 | 1.297 | 1.358 | 1.153 | 1.247 |
| 97714_r_at | 0.253 | 0.971 | 0.931 | 0.941 | 0.946 |
| 97717_at   | 0.051 | 0.846 | 0.781 | 0.944 | 0.852 |
| 97718_at   | 0.364 | 0.923 | 0.943 | 0.905 | 0.915 |
| 97719_at   | 0.142 | 0.869 | 0.843 | 0.961 | 0.834 |
| 97720_at   | 0.193 | 0.897 | 1.166 | 0.854 | 0.822 |
| 97721_at   | 0.458 | 0.804 | 0.772 | 0.822 | 0.753 |
| 97722_at   | 0.142 | 0.883 | 1.197 | 0.942 | 1.109 |
| 97723_at   | 0.265 | 0.925 | 0.859 | 0.980 | 0.874 |
| 97724_at   | 0.219 | 0.837 | 0.829 | 0.975 | 0.853 |
| 97725_at   | 0.386 | 0.851 | 0.834 | 0.899 | 0.892 |
| 97726_at   | 0.357 | 0.907 | 0.880 | 0.923 | 0.940 |
| 97727_at   | 0.478 | 0.911 | 0.905 | 0.983 | 0.917 |
| 97728_at   | 0.353 | 0.814 | 0.808 | 0.916 | 0.826 |
| 97729_at   | 0.340 | 0.985 | 0.957 | 1.018 | 1.012 |
| 97730_at   | 0.507 | 0.957 | 0.964 | 0.963 | 0.942 |

|            |       |       |       |       |       |
|------------|-------|-------|-------|-------|-------|
| 97731_at   | 0.378 | 0.899 | 0.888 | 0.935 | 0.921 |
| 97732_at   | 0.324 | 0.891 | 0.834 | 0.960 | 0.837 |
| 97733_at   | 0.095 | 0.929 | 1.088 | 1.030 | 0.969 |
| 97734_at   | 0.417 | 0.925 | 0.938 | 1.005 | 0.918 |
| 97735_at   | 0.298 | 0.966 | 0.925 | 0.950 | 0.987 |
| 97736_at   | 0.474 | 0.957 | 0.933 | 0.944 | 0.928 |
| 97737_f_at | 0.484 | 0.990 | 0.957 | 0.995 | 0.963 |
| 97738_r_at | 0.343 | 0.947 | 0.966 | 0.989 | 0.974 |
| 97739_at   | 0.321 | 0.866 | 0.902 | 0.993 | 0.913 |
| 97740_at   | 0.343 | 1.425 | 1.288 | 1.196 | 1.484 |
| 97741_at   | 0.248 | 0.985 | 0.984 | 1.001 | 1.053 |
| 97742_s_at | 0.402 | 0.928 | 0.862 | 0.941 | 0.894 |
| 97743_at   | 0.251 | 0.944 | 0.859 | 0.982 | 0.891 |
| 97744_at   | 0.261 | 0.782 | 0.751 | 0.864 | 0.798 |
| 97745_at   | 0.249 | 0.825 | 0.831 | 0.892 | 0.801 |
| 97746_f_at | 0.329 | 0.844 | 0.863 | 0.902 | 0.853 |
| 97747_r_at | 0.449 | 0.827 | 0.838 | 0.921 | 0.836 |
| 97748_at   | 0.355 | 0.890 | 0.858 | 0.978 | 0.865 |
| 97749_at   | 0.322 | 0.904 | 0.916 | 0.963 | 0.971 |
| 97750_at   | 0.049 | 1.002 | 1.135 | 0.947 | 1.073 |
| 97751_f_at | 0.191 | 0.910 | 1.040 | 1.082 | 0.943 |
| 97752_at   | 0.110 | 0.961 | 0.998 | 0.878 | 0.903 |
| 97753_at   | 0.270 | 1.023 | 0.943 | 1.006 | 0.975 |
| 97754_at   | 0.344 | 0.880 | 0.901 | 0.962 | 0.948 |
| 97755_at   | 0.373 | 0.836 | 0.825 | 0.920 | 0.869 |
| 97756_s_at | 0.174 | 0.926 | 0.816 | 0.888 | 0.947 |
| 97757_at   | 0.405 | 0.979 | 0.929 | 1.018 | 0.952 |
| 97758_at   | 0.390 | 0.985 | 1.045 | 0.982 | 1.078 |
| 97759_at   | 0.509 | 0.920 | 0.911 | 0.932 | 0.903 |
| 97760_at   | 0.342 | 0.921 | 0.959 | 1.003 | 0.981 |
| 97761_f_at | 0.355 | 0.889 | 0.856 | 0.939 | 0.915 |
| 97762_f_at | 0.352 | 0.867 | 0.893 | 0.945 | 0.919 |
| 97763_at   | 0.155 | 0.841 | 0.993 | 0.973 | 0.959 |
| 97764_at   | 0.282 | 1.041 | 1.041 | 1.019 | 1.127 |
| 97765_g_at | 0.458 | 0.878 | 0.856 | 0.911 | 0.850 |
| 97766_at   | 0.276 | 1.004 | 1.006 | 0.989 | 1.041 |
| 97767_at   | 0.467 | 0.882 | 0.870 | 0.941 | 0.882 |
| 97768_at   | 0.315 | 0.925 | 0.941 | 0.988 | 0.907 |
| 97769_at   | 0.219 | 0.941 | 0.866 | 1.024 | 0.946 |
| 97770_s_at | 0.246 | 1.383 | 1.269 | 1.164 | 1.180 |
| 97771_r_at | 0.326 | 1.000 | 0.927 | 0.962 | 0.932 |
| 97772_at   | 0.369 | 0.915 | 0.943 | 0.906 | 0.961 |
| 97773_at   | 0.224 | 0.829 | 0.969 | 1.009 | 1.058 |
| 97774_at   | 0.355 | 0.907 | 0.898 | 0.957 | 0.920 |
| 97775_at   | 0.375 | 0.886 | 0.864 | 0.954 | 0.920 |
| 97776_at   | 0.337 | 0.873 | 0.809 | 0.927 | 0.829 |
| 97777_at   | 0.415 | 0.822 | 0.820 | 0.918 | 0.827 |



|            |       |       |       |       |       |
|------------|-------|-------|-------|-------|-------|
| 97778_at   | 0.320 | 0.865 | 0.830 | 0.975 | 0.844 |
| 97779_at   | 0.109 | 0.848 | 0.980 | 0.859 | 0.922 |
| 97780_at   | 0.337 | 0.959 | 0.920 | 0.978 | 0.982 |
| 97781_at   | 0.320 | 0.892 | 0.934 | 0.891 | 0.937 |
| 97782_at   | 0.343 | 0.815 | 0.796 | 0.936 | 0.815 |
| 97783_at   | 0.056 | 0.988 | 1.255 | 0.943 | 0.984 |
| 97784_at   | 0.250 | 0.898 | 0.849 | 0.971 | 0.884 |
| 97785_at   | 0.255 | 0.808 | 0.779 | 0.898 | 0.755 |
| 97786_at   | 0.427 | 0.861 | 0.803 | 0.903 | 0.860 |
| 97787_at   | 0.350 | 0.810 | 0.810 | 0.917 | 0.840 |
| 97788_at   | 0.232 | 0.867 | 0.860 | 0.949 | 0.896 |
| 97789_at   | 0.354 | 0.851 | 0.825 | 0.930 | 0.801 |
| 97790_s_at | 0.297 | 1.038 | 0.945 | 1.077 | 1.028 |
| 97791_at   | 0.219 | 0.855 | 0.803 | 0.929 | 0.881 |
| 97792_at   | 0.495 | 0.875 | 0.875 | 0.914 | 0.863 |
| 97793_at   | 0.159 | 0.896 | 0.786 | 0.891 | 0.900 |
| 97794_at   | 0.421 | 0.835 | 0.835 | 0.930 | 0.840 |
| 97795_at   | 0.456 | 0.918 | 0.963 | 0.931 | 1.040 |
| 97796_at   | 0.415 | 0.926 | 0.874 | 0.930 | 0.924 |
| 97797_at   | 0.248 | 1.103 | 1.196 | 1.092 | 1.209 |
| 97798_at   | 0.249 | 1.099 | 0.987 | 0.992 | 1.026 |
| 97800_at   | 0.193 | 1.040 | 1.021 | 1.118 | 1.064 |
| 97802_at   | 0.135 | 1.010 | 1.008 | 0.946 | 1.034 |
| 97803_at   | 0.310 | 1.073 | 1.144 | 1.083 | 1.155 |
| 97807_at   | 0.147 | 1.040 | 1.122 | 0.948 | 1.140 |
| 97808_at   | 0.171 | 1.068 | 1.167 | 0.963 | 1.333 |
| 97809_at   | 0.428 | 1.243 | 1.239 | 1.198 | 1.197 |
| 97811_at   | 0.261 | 1.028 | 1.077 | 1.098 | 1.022 |
| 97812_at   | 0.488 | 1.180 | 1.170 | 1.075 | 1.250 |
| 97813_at   | 0.149 | 1.118 | 1.046 | 1.026 | 0.996 |
| 97814_at   | 0.364 | 0.837 | 0.819 | 0.919 | 0.824 |
| 97816_at   | 0.206 | 1.306 | 1.275 | 1.016 | 1.429 |
| 97817_at   | 0.117 | 1.189 | 1.166 | 1.023 | 1.152 |
| 97818_at   | 0.177 | 1.123 | 1.218 | 1.025 | 1.240 |
| 97819_at   | 0.035 | 0.943 | 1.756 | 1.169 | 1.072 |
| 97820_at   | 0.308 | 1.141 | 1.172 | 1.059 | 1.178 |
| 97821_at   | 0.248 | 1.048 | 0.985 | 0.977 | 1.058 |
| 97822_at   | 0.440 | 1.053 | 1.149 | 1.061 | 1.074 |
| 97823_g_at | 0.492 | 1.017 | 1.024 | 0.981 | 1.065 |
| 97824_at   | 0.154 | 1.086 | 1.299 | 1.004 | 1.164 |
| 97825_at   | 0.332 | 1.144 | 1.192 | 1.173 | 1.068 |
| 97826_at   | 0.039 | 1.146 | 2.980 | 1.100 | 1.228 |
| 97828_at   | 0.231 | 1.008 | 1.016 | 0.932 | 0.998 |
| 97829_at   | 0.324 | 1.084 | 1.051 | 1.022 | 1.091 |
| 97830_at   | 0.181 | 0.878 | 0.812 | 0.976 | 0.828 |
| 97832_at   | 0.197 | 0.711 | 0.785 | 0.932 | 0.826 |
| 97833_at   | 0.189 | 1.118 | 1.187 | 1.032 | 1.139 |

|            |       |       |       |       |       |
|------------|-------|-------|-------|-------|-------|
| 97834_g_at | 0.312 | 1.283 | 1.424 | 1.134 | 1.367 |
| 97835_at   | 0.091 | 1.119 | 0.804 | 0.844 | 1.001 |
| 97836_at   | 0.345 | 1.060 | 1.003 | 1.044 | 1.091 |
| 97838_at   | 0.096 | 1.310 | 1.351 | 1.008 | 1.285 |
| 97839_at   | 0.365 | 1.171 | 1.259 | 1.049 | 1.214 |
| 97841_at   | 0.291 | 1.000 | 1.065 | 0.959 | 1.045 |
| 97843_at   | 0.497 | 1.095 | 1.218 | 1.066 | 1.251 |
| 97844_at   | 0.310 | 1.207 | 1.019 | 0.959 | 1.134 |
| 97845_at   | 0.467 | 0.911 | 0.910 | 0.943 | 0.890 |
| 97846_at   | 0.290 | 1.167 | 1.172 | 1.053 | 1.165 |
| 97847_at   | 0.245 | 0.946 | 0.962 | 0.939 | 1.004 |
| 97848_at   | 0.062 | 1.159 | 0.988 | 0.984 | 1.048 |
| 97849_at   | 0.398 | 0.839 | 0.815 | 0.893 | 0.891 |
| 97853_at   | 0.467 | 1.096 | 1.048 | 0.998 | 1.068 |
| 97857_at   | 0.405 | 1.039 | 1.050 | 0.999 | 1.170 |
| 97858_at   | 0.189 | 1.073 | 1.019 | 0.957 | 1.017 |
| 97859_at   | 0.368 | 1.149 | 1.189 | 1.016 | 1.143 |
| 97860_at   | 0.346 | 0.911 | 0.916 | 0.914 | 0.973 |
| 97861_at   | 0.327 | 0.997 | 0.964 | 1.004 | 0.909 |
| 97862_s_at | 0.441 | 1.022 | 1.067 | 1.057 | 1.051 |
| 97863_at   | 0.187 | 0.991 | 0.908 | 0.960 | 0.984 |
| 97864_at   | 0.371 | 0.907 | 1.022 | 0.930 | 0.995 |
| 97865_g_at | 0.307 | 1.006 | 1.057 | 0.997 | 1.102 |
| 97866_at   | 0.305 | 1.262 | 1.176 | 1.084 | 1.215 |
| 97867_at   | 0.365 | 0.950 | 0.883 | 0.892 | 0.965 |
| 97868_at   | 0.179 | 1.009 | 1.021 | 1.013 | 0.951 |
| 97869_at   | 0.435 | 1.075 | 1.135 | 1.333 | 1.157 |
| 97870_s_at | 0.202 | 0.924 | 0.913 | 0.993 | 0.975 |
| 97871_at   | 0.445 | 1.100 | 1.079 | 1.031 | 1.090 |
| 97873_at   | 0.271 | 0.858 | 0.787 | 0.880 | 0.868 |
| 97874_at   | 0.461 | 1.040 | 1.151 | 1.048 | 1.074 |
| 97875_at   | 0.296 | 1.051 | 1.043 | 1.027 | 1.007 |
| 97876_at   | 0.461 | 1.040 | 1.080 | 1.049 | 1.112 |
| 97880_at   | 0.399 | 1.125 | 1.165 | 1.207 | 1.125 |
| 97882_at   | 0.075 | 1.001 | 1.160 | 1.004 | 0.980 |
| 97884_at   | 0.126 | 0.909 | 0.934 | 0.967 | 0.999 |
| 97885_at   | 0.069 | 1.131 | 1.236 | 1.060 | 1.089 |
| 97886_at   | 0.263 | 0.874 | 0.846 | 0.935 | 0.902 |
| 97887_at   | 0.445 | 0.905 | 0.908 | 0.976 | 0.920 |
| 97888_at   | 0.310 | 1.122 | 1.184 | 1.045 | 1.242 |
| 97889_at   | 0.478 | 0.940 | 0.942 | 0.977 | 0.917 |
| 97890_at   | 0.322 | 1.201 | 1.183 | 1.037 | 1.381 |
| 97891_at   | 0.331 | 0.853 | 0.821 | 0.906 | 0.869 |
| 97892_at   | 0.274 | 1.071 | 1.013 | 0.963 | 1.055 |
| 97893_at   | 0.040 | 1.070 | 1.105 | 0.997 | 1.182 |
| 97894_at   | 0.299 | 1.118 | 1.280 | 1.111 | 1.059 |
| 97895_f_at | 0.445 | 0.970 | 0.943 | 0.941 | 0.941 |

|            |       |       |       |       |       |
|------------|-------|-------|-------|-------|-------|
| 97896_r_at | 0.445 | 1.024 | 1.075 | 1.058 | 1.085 |
| 97897_at   | 0.108 | 1.061 | 0.959 | 0.988 | 1.083 |
| 97900_at   | 0.274 | 1.227 | 1.298 | 1.046 | 1.253 |
| 97901_at   | 0.301 | 1.018 | 0.984 | 0.964 | 0.954 |
| 97903_at   | 0.429 | 1.043 | 1.042 | 1.034 | 1.065 |
| 97904_at   | 0.072 | 1.117 | 1.292 | 0.976 | 1.229 |
| 97906_at   | 0.178 | 0.973 | 0.950 | 1.024 | 1.032 |
| 97907_at   | 0.058 | 1.009 | 1.072 | 0.874 | 1.103 |
| 97908_at   | 0.231 | 1.196 | 1.113 | 1.051 | 1.163 |
| 97909_at   | 0.143 | 1.300 | 1.411 | 0.999 | 1.526 |
| 97910_at   | 0.468 | 0.962 | 0.946 | 0.934 | 0.930 |
| 97911_at   | 0.154 | 1.135 | 1.211 | 0.991 | 1.145 |
| 97912_at   | 0.410 | 0.987 | 0.970 | 1.016 | 0.867 |
| 97914_at   | 0.338 | 1.297 | 1.307 | 1.139 | 1.155 |
| 97915_at   | 0.174 | 1.041 | 1.023 | 0.958 | 1.057 |
| 97916_at   | 0.345 | 1.190 | 1.166 | 1.051 | 1.261 |
| 97917_at   | 0.035 | 0.958 | 0.925 | 0.933 | 1.100 |
| 97918_at   | 0.484 | 1.125 | 1.096 | 1.027 | 1.137 |
| 97919_at   | 0.351 | 1.545 | 1.520 | 1.198 | 1.546 |
| 97920_at   | 0.099 | 1.264 | 1.055 | 1.037 | 1.177 |
| 97921_at   | 0.238 | 1.173 | 0.965 | 1.069 | 1.149 |
| 97922_at   | 0.346 | 1.169 | 1.195 | 1.048 | 1.169 |
| 97923_at   | 0.120 | 1.258 | 1.197 | 0.991 | 1.177 |
| 97924_at   | 0.385 | 0.952 | 0.961 | 0.940 | 0.929 |
| 97925_at   | 0.200 | 1.214 | 1.085 | 1.152 | 1.136 |
| 97926_s_at | 0.199 | 1.001 | 1.125 | 1.413 | 1.156 |
| 97927_at   | 0.290 | 0.964 | 1.010 | 1.009 | 1.027 |
| 97928_at   | 0.383 | 1.156 | 1.102 | 1.093 | 1.151 |
| 97929_r_at | 0.412 | 0.961 | 0.902 | 0.924 | 0.874 |
| 97930_f_at | 0.250 | 1.110 | 1.040 | 1.031 | 1.062 |
| 97931_i_at | 0.465 | 0.847 | 0.872 | 0.896 | 0.846 |
| 97932_f_at | 0.328 | 1.095 | 1.025 | 1.023 | 1.066 |
| 97933_at   | 0.273 | 1.027 | 0.952 | 0.984 | 0.960 |
| 97934_at   | 0.390 | 1.158 | 1.187 | 1.079 | 1.159 |
| 97935_at   | 0.392 | 1.010 | 0.957 | 0.965 | 0.974 |
| 97936_at   | 0.143 | 0.983 | 0.923 | 1.006 | 1.011 |
| 97937_at   | 0.049 | 1.066 | 0.964 | 1.181 | 1.009 |
| 97939_at   | 0.355 | 1.170 | 1.334 | 1.017 | 1.209 |
| 97940_at   | 0.314 | 0.918 | 0.879 | 0.932 | 0.864 |
| 97941_at   | 0.288 | 0.917 | 0.878 | 0.894 | 0.822 |
| 97942_g_at | 0.247 | 0.943 | 0.921 | 0.993 | 0.938 |
| 97943_at   | 0.444 | 0.906 | 0.911 | 0.946 | 0.936 |
| 97944_f_at | 0.227 | 0.847 | 0.887 | 0.829 | 0.921 |
| 97945_at   | 0.079 | 0.789 | 1.022 | 0.790 | 1.048 |
| 97946_at   | 0.285 | 0.939 | 0.934 | 0.924 | 0.972 |
| 97947_at   | 0.201 | 1.270 | 1.517 | 1.084 | 1.441 |
| 97948_at   | 0.388 | 1.186 | 1.118 | 1.109 | 1.157 |

|            |       |       |       |       |       |
|------------|-------|-------|-------|-------|-------|
| 97949_at   | 0.206 | 1.066 | 1.390 | 1.106 | 1.183 |
| 97950_at   | 0.276 | 1.267 | 1.204 | 1.225 | 1.169 |
| 97951_s_at | 0.184 | 1.057 | 1.013 | 1.060 | 1.008 |
| 97952_at   | 0.155 | 0.928 | 0.974 | 1.052 | 0.909 |
| 97953_g_at | 0.468 | 1.131 | 1.192 | 1.126 | 1.162 |
| 97954_at   | 0.341 | 0.934 | 0.914 | 1.030 | 0.911 |
| 97955_at   | 0.502 | 0.895 | 0.888 | 0.918 | 0.874 |
| 97956_g_at | 0.434 | 0.866 | 0.800 | 0.875 | 0.812 |
| 97957_at   | 0.276 | 0.961 | 0.880 | 0.946 | 0.898 |
| 97958_at   | 0.132 | 1.235 | 1.074 | 1.029 | 1.138 |
| 97960_at   | 0.258 | 0.861 | 0.910 | 1.025 | 0.969 |
| 97962_at   | 0.334 | 1.028 | 1.008 | 1.032 | 0.988 |
| 97963_at   | 0.317 | 1.102 | 1.070 | 1.034 | 1.023 |
| 97964_at   | 0.033 | 0.925 | 1.213 | 0.922 | 0.964 |
| 97965_at   | 0.252 | 0.913 | 0.909 | 1.028 | 0.902 |
| 97966_at   | 0.406 | 0.945 | 0.918 | 0.920 | 0.917 |
| 97967_at   | 0.172 | 1.317 | 1.354 | 1.102 | 1.172 |
| 97969_at   | 0.390 | 0.934 | 0.909 | 0.988 | 0.947 |
| 97970_at   | 0.331 | 0.850 | 0.815 | 0.927 | 0.831 |
| 97971_at   | 0.328 | 0.974 | 1.014 | 1.006 | 1.033 |
| 97972_at   | 0.428 | 1.193 | 1.146 | 1.081 | 1.233 |
| 97973_at   | 0.509 | 1.004 | 1.005 | 0.991 | 1.001 |
| 97974_at   | 0.072 | 0.902 | 0.900 | 0.983 | 0.817 |
| 97975_at   | 0.198 | 0.935 | 0.926 | 0.805 | 1.134 |
| 97976_at   | 0.474 | 1.099 | 1.060 | 1.042 | 1.114 |
| 97977_at   | 0.165 | 1.015 | 0.921 | 0.989 | 0.907 |
| 97979_at   | 0.076 | 0.951 | 1.023 | 0.927 | 1.097 |
| 97980_at   | 0.276 | 1.014 | 1.002 | 1.067 | 0.998 |
| 97982_at   | 0.431 | 0.821 | 0.786 | 0.877 | 0.815 |
| 97983_s_at | 0.367 | 1.227 | 1.111 | 1.154 | 1.191 |
| 97984_i_at | 0.204 | 1.158 | 1.074 | 0.967 | 1.111 |
| 97985_f_at | 0.114 | 1.154 | 1.091 | 0.986 | 1.047 |
| 97986_at   | 0.189 | 0.914 | 0.872 | 1.019 | 0.917 |
| 97987_at   | 0.312 | 0.871 | 0.821 | 0.936 | 0.865 |
| 97988_at   | 0.313 | 0.917 | 0.861 | 0.931 | 0.942 |
| 97989_at   | 0.389 | 0.955 | 0.956 | 1.012 | 0.957 |
| 97990_at   | 0.161 | 1.131 | 1.405 | 1.413 | 0.960 |
| 97991_at   | 0.470 | 1.209 | 1.288 | 1.100 | 1.223 |
| 97992_at   | 0.114 | 0.939 | 0.814 | 0.923 | 0.859 |
| 97993_at   | 0.114 | 0.912 | 0.904 | 1.003 | 0.925 |
| 97994_at   | 0.412 | 0.921 | 0.898 | 0.889 | 1.002 |
| 97995_at   | 0.077 | 0.885 | 0.833 | 0.963 | 0.946 |
| 97996_at   | 0.219 | 0.963 | 0.899 | 0.897 | 0.929 |
| 97997_at   | 0.163 | 1.066 | 0.961 | 1.036 | 0.947 |
| 97998_at   | 0.214 | 1.138 | 1.029 | 1.201 | 0.957 |
| 98000_at   | 0.379 | 0.832 | 0.800 | 0.908 | 0.803 |
| 98001_at   | 0.340 | 1.038 | 1.051 | 1.075 | 0.957 |

|            |       |       |       |       |       |
|------------|-------|-------|-------|-------|-------|
| 98002_at   | 0.095 | 1.100 | 1.309 | 1.024 | 1.105 |
| 98003_at   | 0.174 | 0.898 | 0.957 | 0.977 | 1.058 |
| 98004_at   | 0.233 | 0.877 | 0.887 | 1.009 | 0.981 |
| 98005_at   | 0.290 | 1.160 | 1.101 | 1.066 | 1.237 |
| 98006_at   | 0.247 | 0.994 | 1.108 | 1.015 | 1.046 |
| 98007_at   | 0.341 | 1.072 | 1.034 | 1.075 | 1.047 |
| 98008_at   | 0.189 | 1.084 | 1.139 | 1.102 | 0.994 |
| 98010_at   | 0.422 | 0.930 | 0.945 | 0.945 | 0.947 |
| 98011_at   | 0.309 | 1.035 | 0.938 | 1.026 | 1.002 |
| 98013_at   | 0.256 | 1.272 | 1.327 | 1.017 | 1.453 |
| 98014_at   | 0.301 | 0.823 | 0.860 | 0.913 | 0.869 |
| 98015_at   | 0.484 | 1.002 | 1.017 | 1.010 | 1.014 |
| 98016_at   | 0.477 | 0.924 | 0.943 | 0.966 | 0.925 |
| 98017_at   | 0.269 | 1.000 | 1.002 | 1.039 | 0.950 |
| 98018_at   | 0.379 | 1.004 | 1.004 | 0.983 | 1.086 |
| 98019_at   | 0.091 | 0.986 | 0.932 | 1.020 | 0.994 |
| 98020_at   | 0.032 | 1.177 | 1.130 | 1.021 | 1.160 |
| 98021_at   | 0.376 | 1.003 | 1.030 | 0.994 | 1.051 |
| 98022_at   | 0.434 | 0.957 | 0.930 | 0.958 | 0.952 |
| 98023_r_at | 0.201 | 0.978 | 1.003 | 0.939 | 0.946 |
| 98024_at   | 0.314 | 1.051 | 1.066 | 0.983 | 1.095 |
| 98025_at   | 0.077 | 1.111 | 1.877 | 1.038 | 1.559 |
| 98026_g_at | 0.090 | 1.019 | 1.321 | 0.986 | 1.176 |
| 98027_at   | 0.488 | 0.787 | 0.773 | 0.867 | 0.748 |
| 98028_at   | 0.094 | 0.890 | 0.867 | 1.034 | 0.839 |
| 98029_at   | 0.181 | 1.006 | 0.941 | 1.057 | 0.930 |
| 98030_at   | 0.121 | 1.011 | 1.004 | 0.840 | 1.081 |
| 98031_at   | 0.151 | 0.900 | 0.876 | 0.983 | 0.875 |
| 98032_at   | 0.314 | 1.008 | 1.009 | 0.991 | 1.023 |
| 98033_at   | 0.125 | 1.069 | 1.321 | 1.091 | 1.298 |
| 98034_at   | 0.035 | 1.095 | 1.439 | 0.911 | 1.322 |
| 98035_g_at | 0.050 | 1.038 | 1.307 | 0.904 | 1.226 |
| 98036_at   | 0.154 | 1.078 | 0.980 | 1.076 | 0.987 |
| 98037_at   | 0.349 | 1.013 | 1.076 | 0.987 | 1.083 |
| 98038_at   | 0.079 | 1.358 | 1.612 | 1.134 | 1.468 |
| 98039_at   | 0.285 | 0.963 | 0.996 | 0.920 | 1.019 |
| 98040_at   | 0.377 | 0.906 | 0.930 | 0.949 | 0.869 |
| 98041_at   | 0.334 | 1.002 | 1.081 | 1.025 | 1.012 |
| 98042_at   | 0.379 | 1.114 | 1.182 | 1.075 | 1.199 |
| 98044_at   | 0.492 | 0.901 | 0.906 | 0.937 | 0.902 |
| 98045_s_at | 0.188 | 1.117 | 1.232 | 1.131 | 1.110 |
| 98047_at   | 0.139 | 1.097 | 1.070 | 1.014 | 1.134 |
| 98048_at   | 0.171 | 1.235 | 1.168 | 1.019 | 1.264 |
| 98049_at   | 0.405 | 1.019 | 1.015 | 1.022 | 1.081 |
| 98051_at   | 0.006 | 1.037 | 0.897 | 0.941 | 0.929 |
| 98052_at   | 0.358 | 1.097 | 1.039 | 1.047 | 1.046 |
| 98053_at   | 0.115 | 1.299 | 1.199 | 1.103 | 1.127 |

|            |       |       |       |       |       |
|------------|-------|-------|-------|-------|-------|
| 98054_at   | 0.490 | 0.952 | 0.943 | 0.980 | 0.903 |
| 98055_at   | 0.329 | 1.027 | 0.956 | 0.986 | 0.986 |
| 98056_at   | 0.379 | 1.070 | 1.011 | 1.136 | 1.044 |
| 98057_at   | 0.355 | 1.014 | 1.065 | 1.055 | 0.984 |
| 98059_s_at | 0.392 | 1.215 | 1.213 | 1.155 | 1.158 |
| 98060_at   | 0.094 | 0.993 | 0.886 | 1.004 | 0.902 |
| 98061_at   | 0.225 | 0.998 | 1.028 | 0.986 | 1.106 |
| 98063_at   | 0.312 | 0.115 | 0.106 | 0.121 | 0.108 |
| 98064_at   | 0.077 | 1.059 | 1.048 | 0.973 | 1.055 |
| 98065_at   | 0.244 | 0.991 | 0.942 | 1.125 | 0.994 |
| 98066_r_at | 0.147 | 1.079 | 1.015 | 1.006 | 0.927 |
| 98067_at   | 0.332 | 0.895 | 0.861 | 0.913 | 0.925 |
| 98069_s_at | 0.255 | 1.051 | 1.039 | 1.044 | 0.976 |
| 98070_at   | 0.104 | 1.082 | 1.007 | 1.081 | 1.017 |
| 98071_f_at | 0.119 | 0.996 | 1.191 | 1.008 | 1.179 |
| 98072_r_at | 0.328 | 1.117 | 1.139 | 1.012 | 1.084 |
| 98073_at   | 0.188 | 1.099 | 1.061 | 1.073 | 0.980 |
| 98075_at   | 0.292 | 1.056 | 1.078 | 0.964 | 1.011 |
| 98076_at   | 0.107 | 1.020 | 1.106 | 0.933 | 1.048 |
| 98077_at   | 0.291 | 0.965 | 1.184 | 1.151 | 0.945 |
| 98078_at   | 0.445 | 0.947 | 0.913 | 0.942 | 0.941 |
| 98079_at   | 0.109 | 0.964 | 0.884 | 1.008 | 0.999 |
| 98081_at   | 0.172 | 0.930 | 1.034 | 0.955 | 1.054 |
| 98082_at   | 0.254 | 0.945 | 0.992 | 0.999 | 1.000 |
| 98083_at   | 0.204 | 1.308 | 1.112 | 1.086 | 1.276 |
| 98084_at   | 0.287 | 1.046 | 1.079 | 0.969 | 0.943 |
| 98085_f_at | 0.344 | 1.052 | 1.046 | 0.960 | 1.013 |
| 98086_r_at | 0.443 | 0.752 | 0.744 | 0.760 | 0.678 |
| 98087_at   | 0.458 | 1.243 | 1.232 | 1.217 | 1.281 |
| 98088_at   | 0.318 | 0.988 | 1.124 | 1.116 | 1.024 |
| 98089_at   | 0.383 | 1.052 | 1.003 | 1.028 | 1.018 |
| 98090_at   | 0.298 | 0.968 | 1.005 | 0.992 | 1.002 |
| 98092_at   | 0.072 | 0.989 | 1.391 | 0.913 | 1.252 |
| 98094_f_at | 0.332 | 1.097 | 1.025 | 1.016 | 1.062 |
| 98096_f_at | 0.188 | 1.046 | 0.951 | 0.970 | 1.016 |
| 98097_r_at | 0.382 | 0.932 | 0.888 | 0.943 | 0.946 |
| 98098_at   | 0.143 | 0.876 | 0.846 | 0.980 | 0.885 |
| 98099_at   | 0.150 | 1.121 | 1.112 | 0.949 | 1.080 |
| 98101_at   | 0.345 | 1.136 | 1.151 | 1.022 | 1.217 |
| 98102_at   | 0.461 | 1.092 | 1.102 | 1.231 | 1.134 |
| 98104_at   | 0.388 | 1.181 | 1.240 | 1.025 | 1.230 |
| 98106_at   | 0.362 | 1.036 | 1.081 | 1.069 | 1.095 |
| 98107_at   | 0.303 | 1.231 | 1.229 | 1.058 | 1.243 |
| 98108_at   | 0.402 | 0.848 | 0.858 | 0.835 | 0.791 |
| 98109_at   | 0.370 | 0.881 | 0.831 | 0.893 | 0.882 |
| 98110_at   | 0.288 | 1.234 | 1.084 | 1.060 | 1.142 |
| 98111_at   | 0.226 | 1.028 | 0.712 | 0.996 | 0.746 |

|            |       |       |       |       |       |
|------------|-------|-------|-------|-------|-------|
| 98112_r_at | 0.432 | 1.031 | 1.065 | 1.050 | 1.024 |
| 98113_at   | 0.151 | 0.994 | 1.091 | 0.936 | 1.125 |
| 98114_at   | 0.400 | 1.152 | 1.112 | 1.073 | 1.173 |
| 98116_at   | 0.477 | 0.943 | 0.935 | 0.985 | 0.895 |
| 98117_at   | 0.481 | 0.821 | 0.795 | 0.841 | 0.812 |
| 98118_at   | 0.458 | 0.817 | 0.799 | 0.858 | 0.722 |
| 98119_at   | 0.305 | 1.111 | 1.120 | 1.030 | 1.062 |
| 98120_at   | 0.318 | 1.025 | 1.030 | 0.971 | 1.066 |
| 98121_at   | 0.301 | 1.121 | 1.056 | 1.009 | 1.094 |
| 98122_at   | 0.330 | 1.239 | 1.316 | 1.043 | 1.225 |
| 98123_at   | 0.420 | 0.927 | 0.904 | 0.952 | 0.910 |
| 98124_at   | 0.492 | 1.033 | 1.028 | 1.006 | 1.019 |
| 98125_at   | 0.258 | 0.970 | 0.892 | 0.922 | 0.988 |
| 98126_s_at | 0.246 | 1.095 | 0.867 | 1.355 | 0.921 |
| 98127_at   | 0.234 | 1.292 | 1.463 | 1.071 | 1.425 |
| 98128_at   | 0.372 | 0.965 | 1.053 | 0.999 | 1.029 |
| 98129_at   | 0.166 | 1.014 | 1.056 | 0.886 | 1.089 |
| 98130_at   | 0.147 | 0.938 | 0.907 | 0.973 | 0.875 |
| 98131_at   | 0.171 | 0.970 | 0.940 | 1.042 | 1.024 |
| 98132_at   | 0.405 | 1.042 | 1.153 | 1.147 | 1.079 |
| 98133_at   | 0.420 | 0.925 | 0.903 | 0.942 | 0.951 |
| 98134_at   | 0.507 | 1.052 | 1.064 | 1.030 | 1.056 |
| 98135_r_at | 0.387 | 0.973 | 0.967 | 0.953 | 0.961 |
| 98136_at   | 0.367 | 1.210 | 1.207 | 1.070 | 1.170 |
| 98137_at   | 0.459 | 0.894 | 0.851 | 0.944 | 0.904 |
| 98138_at   | 0.161 | 0.987 | 1.004 | 0.896 | 0.976 |
| 98139_at   | 0.422 | 0.826 | 0.758 | 0.872 | 0.764 |
| 98140_at   | 0.484 | 0.913 | 0.886 | 0.923 | 0.860 |
| 98141_at   | 0.319 | 1.004 | 0.947 | 0.997 | 1.019 |
| 98142_at   | 0.218 | 1.188 | 1.088 | 1.005 | 1.160 |
| 98143_at   | 0.495 | 1.079 | 1.101 | 1.036 | 1.107 |
| 98144_f_at | 0.387 | 1.073 | 1.068 | 1.041 | 1.142 |
| 98146_at   | 0.449 | 1.111 | 1.104 | 1.061 | 1.101 |
| 98147_at   | 0.420 | 0.988 | 1.022 | 0.995 | 0.998 |
| 98148_at   | 0.392 | 0.819 | 0.783 | 0.870 | 0.810 |
| 98149_s_at | 0.290 | 0.943 | 1.085 | 1.016 | 1.131 |
| 98150_at   | 0.108 | 1.199 | 1.198 | 1.082 | 1.144 |
| 98151_s_at | 0.132 | 0.966 | 1.058 | 1.078 | 1.082 |
| 98152_at   | 0.310 | 1.028 | 0.965 | 1.012 | 1.006 |
| 98153_at   | 0.497 | 0.996 | 1.000 | 0.964 | 0.985 |
| 98154_at   | 0.488 | 1.136 | 1.155 | 1.087 | 1.111 |
| 98155_r_at | 0.145 | 0.872 | 0.936 | 0.961 | 0.881 |
| 98168_at   | 0.167 | 0.976 | 1.145 | 0.944 | 1.133 |
| 98169_s_at | 0.444 | 0.948 | 0.909 | 0.962 | 0.928 |
| 98240_at   | 0.488 | 0.867 | 0.871 | 0.919 | 0.852 |
| 98245_at   | 0.105 | 0.919 | 0.926 | 1.013 | 0.987 |
| 98247_at   | 0.282 | 0.806 | 0.824 | 0.913 | 0.863 |

|            |       |       |       |       |       |
|------------|-------|-------|-------|-------|-------|
| 98254_f_at | 0.318 | 1.017 | 1.113 | 0.945 | 1.269 |
| 98276_at   | 0.468 | 0.826 | 0.789 | 0.872 | 0.837 |
| 98277_at   | 0.318 | 0.940 | 0.883 | 0.980 | 0.896 |
| 98278_at   | 0.492 | 0.902 | 0.871 | 0.935 | 0.882 |
| 98279_at   | 0.431 | 0.864 | 0.817 | 0.896 | 0.840 |
| 98280_at   | 0.354 | 0.917 | 0.870 | 0.931 | 0.952 |
| 98281_at   | 0.200 | 0.949 | 0.902 | 0.963 | 0.954 |
| 98282_at   | 0.349 | 0.986 | 1.047 | 0.991 | 1.013 |
| 98283_at   | 0.474 | 1.027 | 0.973 | 1.044 | 1.025 |
| 98284_f_at | 0.356 | 0.949 | 0.891 | 0.958 | 0.906 |
| 98285_at   | 0.443 | 0.884 | 0.866 | 0.941 | 0.898 |
| 98286_at   | 0.463 | 0.879 | 0.876 | 0.937 | 0.884 |
| 98287_at   | 0.228 | 0.901 | 0.855 | 0.915 | 0.884 |
| 98288_at   | 0.436 | 0.919 | 0.845 | 0.917 | 0.869 |
| 98289_at   | 0.056 | 0.833 | 0.858 | 0.994 | 0.930 |
| 98290_at   | 0.371 | 0.855 | 0.829 | 0.925 | 0.813 |
| 98291_at   | 0.274 | 0.931 | 0.897 | 0.938 | 0.867 |
| 98292_at   | 0.417 | 0.854 | 0.810 | 0.841 | 0.836 |
| 98293_g_at | 0.290 | 0.829 | 0.807 | 0.954 | 0.866 |
| 98294_at   | 0.386 | 0.820 | 0.750 | 0.877 | 0.815 |
| 98295_at   | 0.320 | 0.924 | 0.836 | 0.957 | 0.912 |
| 98296_at   | 0.332 | 0.908 | 0.817 | 0.927 | 0.889 |
| 98297_at   | 0.263 | 0.913 | 0.869 | 0.956 | 0.871 |
| 98298_at   | 0.278 | 0.825 | 0.785 | 0.924 | 0.801 |
| 98299_s_at | 0.378 | 0.860 | 0.809 | 0.892 | 0.845 |
| 98300_at   | 0.328 | 0.881 | 0.861 | 0.935 | 0.883 |
| 98301_at   | 0.371 | 0.882 | 0.862 | 0.940 | 0.912 |
| 98302_at   | 0.364 | 0.837 | 0.844 | 0.914 | 0.825 |
| 98303_at   | 0.365 | 0.951 | 0.953 | 1.006 | 0.982 |
| 98304_at   | 0.163 | 0.903 | 1.036 | 0.885 | 0.970 |
| 98305_at   | 0.434 | 0.854 | 0.854 | 0.927 | 0.892 |
| 98306_g_at | 0.345 | 0.891 | 0.855 | 0.969 | 0.912 |
| 98307_at   | 0.225 | 0.844 | 0.803 | 0.915 | 0.843 |
| 98308_at   | 0.353 | 1.398 | 0.935 | 2.017 | 0.935 |
| 98309_at   | 0.228 | 0.920 | 0.935 | 1.017 | 0.980 |
| 98310_at   | 0.408 | 0.852 | 0.851 | 0.932 | 0.861 |
| 98311_at   | 0.346 | 0.883 | 0.848 | 0.967 | 0.880 |
| 98312_at   | 0.274 | 1.043 | 0.942 | 1.015 | 0.953 |
| 98313_at   | 0.245 | 0.912 | 0.828 | 0.995 | 0.827 |
| 98314_g_at | 0.284 | 0.876 | 0.853 | 0.974 | 0.817 |
| 98315_at   | 0.412 | 0.868 | 0.842 | 0.899 | 0.875 |
| 98316_at   | 0.358 | 0.892 | 0.851 | 0.867 | 0.897 |
| 98317_at   | 0.403 | 0.874 | 0.846 | 0.965 | 0.823 |
| 98318_at   | 0.415 | 0.821 | 0.776 | 0.867 | 0.834 |
| 98319_at   | 0.448 | 0.954 | 0.903 | 0.950 | 0.919 |
| 98320_at   | 0.499 | 0.883 | 0.876 | 0.903 | 0.891 |
| 98321_at   | 0.458 | 0.845 | 0.827 | 0.936 | 0.835 |



|            |       |       |       |       |       |
|------------|-------|-------|-------|-------|-------|
| 98322_at   | 0.151 | 0.910 | 0.910 | 0.977 | 0.979 |
| 98323_at   | 0.275 | 0.865 | 0.754 | 0.893 | 0.834 |
| 98324_at   | 0.217 | 0.932 | 1.141 | 1.001 | 0.947 |
| 98325_at   | 0.411 | 0.941 | 0.912 | 0.947 | 0.939 |
| 98326_f_at | 0.377 | 1.009 | 0.939 | 0.993 | 0.990 |
| 98327_at   | 0.346 | 1.011 | 0.942 | 0.948 | 0.962 |
| 98328_at   | 0.475 | 0.872 | 0.882 | 0.918 | 0.848 |
| 98329_at   | 0.283 | 0.915 | 0.939 | 1.017 | 0.961 |
| 98330_at   | 0.331 | 0.889 | 0.926 | 0.923 | 0.911 |
| 98331_at   | 0.081 | 0.980 | 1.365 | 1.142 | 1.067 |
| 98332_at   | 0.404 | 0.876 | 0.850 | 0.921 | 0.892 |
| 98333_at   | 0.145 | 1.062 | 1.123 | 0.957 | 1.070 |
| 98334_at   | 0.165 | 0.975 | 0.983 | 0.960 | 0.898 |
| 98335_at   | 0.383 | 1.204 | 1.182 | 1.063 | 1.144 |
| 98336_s_at | 0.380 | 0.860 | 0.856 | 0.920 | 0.900 |
| 98337_at   | 0.417 | 0.880 | 0.840 | 0.950 | 0.863 |
| 98338_at   | 0.323 | 0.865 | 0.805 | 0.932 | 0.864 |
| 98339_at   | 0.225 | 0.832 | 0.812 | 0.918 | 0.812 |
| 98340_at   | 0.350 | 0.900 | 0.860 | 0.873 | 0.906 |
| 98341_f_at | 0.265 | 0.846 | 0.829 | 0.931 | 0.766 |
| 98342_at   | 0.216 | 0.963 | 1.047 | 0.946 | 1.035 |
| 98343_s_at | 0.378 | 0.992 | 0.933 | 0.974 | 0.960 |
| 98344_f_at | 0.396 | 0.978 | 0.954 | 1.003 | 0.990 |
| 98345_at   | 0.323 | 0.982 | 0.911 | 0.941 | 0.940 |
| 98346_at   | 0.254 | 1.026 | 0.926 | 1.033 | 0.894 |
| 98347_at   | 0.445 | 0.890 | 0.904 | 0.892 | 0.869 |
| 98348_at   | 0.436 | 0.933 | 0.873 | 0.928 | 0.893 |
| 98349_at   | 0.236 | 0.690 | 0.934 | 1.041 | 0.954 |
| 98350_at   | 0.324 | 0.904 | 0.869 | 0.911 | 0.911 |
| 98351_g_at | 0.355 | 0.851 | 0.847 | 0.915 | 0.884 |
| 98352_r_at | 0.410 | 0.845 | 0.761 | 0.833 | 0.751 |
| 98353_at   | 0.470 | 0.830 | 0.811 | 0.906 | 0.829 |
| 98354_at   | 0.351 | 0.902 | 0.838 | 0.940 | 0.916 |
| 98355_at   | 0.392 | 1.018 | 1.061 | 0.945 | 0.986 |
| 98356_at   | 0.324 | 1.119 | 1.059 | 1.066 | 1.035 |
| 98357_at   | 0.344 | 0.845 | 0.804 | 0.893 | 0.870 |
| 98358_at   | 0.327 | 0.821 | 0.863 | 0.870 | 0.802 |
| 98360_at   | 0.265 | 0.856 | 0.816 | 0.924 | 0.837 |
| 98361_at   | 0.456 | 0.862 | 0.874 | 0.912 | 0.841 |
| 98362_s_at | 0.365 | 0.837 | 0.815 | 0.921 | 0.881 |
| 98363_at   | 0.443 | 0.926 | 0.931 | 0.957 | 0.910 |
| 98364_at   | 0.145 | 1.006 | 1.023 | 0.973 | 1.035 |
| 98365_at   | 0.440 | 0.842 | 0.847 | 0.920 | 0.829 |
| 98366_at   | 0.408 | 1.001 | 0.937 | 1.043 | 0.983 |
| 98367_at   | 0.383 | 0.943 | 0.874 | 0.889 | 0.878 |
| 98368_at   | 0.316 | 0.878 | 0.838 | 0.892 | 0.906 |
| 98369_f_at | 0.358 | 0.981 | 1.050 | 0.937 | 1.177 |

|            |       |       |       |       |       |
|------------|-------|-------|-------|-------|-------|
| 98370_at   | 0.441 | 0.853 | 0.856 | 0.909 | 0.819 |
| 98371_at   | 0.291 | 0.904 | 0.938 | 0.978 | 0.911 |
| 98372_at   | 0.110 | 0.902 | 1.029 | 1.002 | 0.919 |
| 98373_at   | 0.337 | 0.918 | 0.877 | 0.875 | 0.907 |
| 98374_at   | 0.266 | 0.887 | 0.936 | 0.937 | 0.933 |
| 98375_at   | 0.441 | 0.912 | 0.917 | 0.960 | 0.947 |
| 98376_at   | 0.250 | 0.946 | 0.902 | 1.025 | 0.956 |
| 98379_r_at | 0.411 | 0.771 | 0.789 | 0.859 | 0.809 |
| 98380_at   | 0.273 | 0.853 | 0.793 | 0.943 | 0.833 |
| 98381_at   | 0.424 | 0.876 | 0.859 | 0.969 | 0.882 |
| 98382_f_at | 0.329 | 0.817 | 0.792 | 0.905 | 0.825 |
| 98383_r_at | 0.389 | 0.859 | 0.859 | 0.940 | 0.869 |
| 98384_at   | 0.249 | 0.899 | 0.847 | 0.968 | 0.896 |
| 98385_at   | 0.184 | 0.851 | 0.825 | 0.963 | 0.859 |
| 98386_s_at | 0.486 | 1.010 | 0.982 | 1.016 | 1.013 |
| 98387_at   | 0.452 | 0.767 | 0.729 | 0.832 | 0.733 |
| 98388_at   | 0.275 | 0.878 | 0.896 | 0.944 | 0.832 |
| 98389_at   | 0.481 | 0.791 | 0.758 | 0.859 | 0.785 |
| 98390_at   | 0.105 | 0.926 | 0.940 | 1.070 | 0.944 |
| 98391_at   | 0.445 | 0.839 | 0.849 | 0.914 | 0.854 |
| 98392_at   | 0.287 | 0.914 | 0.962 | 0.951 | 0.947 |
| 98394_at   | 0.218 | 0.883 | 0.819 | 0.943 | 0.832 |
| 98395_at   | 0.391 | 0.879 | 0.842 | 0.943 | 0.889 |
| 98397_at   | 0.270 | 1.078 | 1.000 | 0.978 | 0.974 |
| 98398_s_at | 0.097 | 1.171 | 1.427 | 1.071 | 1.362 |
| 98400_at   | 0.296 | 1.009 | 1.038 | 0.999 | 1.021 |
| 98401_at   | 0.050 | 0.961 | 1.000 | 0.927 | 0.912 |
| 98402_at   | 0.165 | 1.238 | 1.145 | 1.005 | 1.091 |
| 98403_at   | 0.465 | 1.027 | 0.985 | 0.987 | 0.977 |
| 98404_at   | 0.225 | 1.146 | 1.103 | 1.068 | 1.032 |
| 98405_at   | 0.175 | 1.180 | 1.337 | 1.062 | 1.287 |
| 98406_at   | 0.158 | 0.740 | 0.968 | 0.720 | 0.846 |
| 98407_at   | 0.436 | 0.919 | 0.894 | 0.940 | 0.964 |
| 98408_at   | 0.247 | 1.027 | 1.040 | 0.985 | 0.965 |
| 98409_at   | 0.228 | 1.307 | 1.223 | 1.044 | 1.243 |
| 98410_at   | 0.346 | 1.085 | 1.007 | 0.982 | 1.045 |
| 98413_at   | 0.507 | 0.902 | 0.890 | 0.926 | 0.895 |
| 98414_at   | 0.373 | 0.827 | 0.768 | 0.827 | 0.704 |
| 98415_at   | 0.342 | 1.246 | 1.282 | 1.015 | 1.335 |
| 98416_at   | 0.385 | 0.945 | 0.919 | 0.941 | 0.898 |
| 98417_at   | 0.136 | 0.940 | 1.049 | 0.954 | 1.001 |
| 98418_at   | 0.154 | 1.072 | 0.972 | 1.009 | 0.956 |
| 98419_at   | 0.308 | 0.897 | 0.849 | 0.921 | 0.884 |
| 98420_at   | 0.209 | 0.879 | 0.864 | 0.972 | 0.895 |
| 98421_at   | 0.486 | 0.910 | 0.866 | 0.904 | 0.837 |
| 98423_at   | 0.390 | 1.004 | 1.008 | 0.987 | 0.944 |
| 98424_at   | 0.159 | 1.227 | 1.061 | 1.027 | 1.089 |

|            |       |       |       |       |       |
|------------|-------|-------|-------|-------|-------|
| 98426_at   | 0.154 | 0.907 | 0.884 | 0.989 | 0.864 |
| 98427_s_at | 0.238 | 1.157 | 1.258 | 1.023 | 1.157 |
| 98428_at   | 0.295 | 0.995 | 1.010 | 1.029 | 1.048 |
| 98429_at   | 0.298 | 1.019 | 1.033 | 1.021 | 0.973 |
| 98430_at   | 0.419 | 0.871 | 0.875 | 0.889 | 0.854 |
| 98431_at   | 0.371 | 0.944 | 0.906 | 0.930 | 0.936 |
| 98432_at   | 0.409 | 1.110 | 1.110 | 1.021 | 1.105 |
| 98433_at   | 0.276 | 0.986 | 1.051 | 1.003 | 0.959 |
| 98434_at   | 0.483 | 1.164 | 1.148 | 1.085 | 1.196 |
| 98435_at   | 0.249 | 1.132 | 1.108 | 1.195 | 1.244 |
| 98436_s_at | 0.046 | 0.931 | 1.068 | 0.945 | 1.155 |
| 98437_at   | 0.232 | 1.075 | 1.109 | 1.031 | 1.078 |
| 98438_f_at | 0.129 | 1.093 | 1.230 | 1.036 | 1.090 |
| 98439_at   | 0.230 | 0.988 | 0.966 | 0.997 | 1.048 |
| 98440_at   | 0.094 | 1.239 | 1.576 | 1.137 | 1.377 |
| 98441_at   | 0.318 | 1.142 | 1.097 | 0.909 | 1.224 |
| 98443_at   | 0.244 | 0.863 | 0.793 | 0.959 | 0.830 |
| 98444_g_at | 0.244 | 0.863 | 0.829 | 0.942 | 0.842 |
| 98445_at   | 0.254 | 0.992 | 0.943 | 1.014 | 0.907 |
| 98446_s_at | 0.507 | 1.003 | 1.038 | 0.969 | 1.017 |
| 98447_at   | 0.053 | 1.051 | 1.001 | 1.179 | 1.068 |
| 98448_at   | 0.472 | 0.884 | 0.907 | 0.957 | 0.891 |
| 98449_at   | 0.100 | 1.086 | 1.037 | 0.958 | 1.031 |
| 98451_at   | 0.165 | 1.187 | 0.998 | 1.053 | 0.956 |
| 98452_at   | 0.212 | 1.274 | 1.044 | 1.078 | 1.072 |
| 98453_at   | 0.240 | 1.079 | 1.003 | 1.050 | 1.059 |
| 98454_at   | 0.114 | 0.942 | 0.802 | 0.990 | 0.831 |
| 98455_at   | 0.427 | 1.184 | 1.126 | 1.083 | 1.195 |
| 98456_at   | 0.280 | 0.931 | 0.913 | 0.929 | 0.961 |
| 98457_at   | 0.340 | 0.910 | 0.828 | 0.921 | 0.944 |
| 98458_at   | 0.170 | 0.989 | 0.902 | 0.932 | 0.998 |
| 98459_at   | 0.445 | 0.912 | 0.909 | 0.980 | 0.913 |
| 98460_at   | 0.062 | 1.049 | 0.997 | 1.115 | 0.921 |
| 98461_at   | 0.389 | 1.123 | 1.099 | 1.051 | 1.144 |
| 98462_s_at | 0.443 | 0.845 | 0.773 | 0.899 | 0.816 |
| 98463_at   | 0.367 | 1.257 | 1.351 | 1.096 | 1.159 |
| 98464_at   | 0.379 | 1.148 | 1.021 | 1.009 | 1.066 |
| 98465_f_at | 0.326 | 1.111 | 1.246 | 1.047 | 1.123 |
| 98466_r_at | 0.505 | 0.935 | 0.922 | 0.944 | 0.924 |
| 98467_at   | 0.308 | 1.301 | 1.138 | 1.142 | 1.274 |
| 98468_r_at | 0.258 | 1.469 | 1.243 | 1.214 | 1.403 |
| 98469_at   | 0.219 | 0.926 | 1.022 | 0.953 | 0.994 |
| 98470_at   | 0.337 | 1.020 | 0.934 | 0.961 | 0.962 |
| 98471_f_at | 0.444 | 0.934 | 0.930 | 0.993 | 0.952 |
| 98472_at   | 0.200 | 1.227 | 1.289 | 1.039 | 1.205 |
| 98473_at   | 0.099 | 1.099 | 1.412 | 1.130 | 1.395 |
| 98474_r_at | 0.179 | 0.972 | 0.950 | 0.952 | 0.886 |

|            |       |       |       |       |       |
|------------|-------|-------|-------|-------|-------|
| 98475_at   | 0.350 | 0.998 | 0.952 | 1.146 | 0.940 |
| 98476_at   | 0.194 | 1.183 | 0.987 | 1.071 | 1.206 |
| 98477_s_at | 0.081 | 1.069 | 0.990 | 1.096 | 1.182 |
| 98478_at   | 0.319 | 1.267 | 1.207 | 1.045 | 1.296 |
| 98479_f_at | 0.156 | 0.952 | 0.842 | 1.007 | 0.988 |
| 98480_s_at | 0.206 | 0.906 | 0.861 | 0.932 | 0.917 |
| 98481_at   | 0.484 | 0.863 | 0.826 | 0.911 | 0.800 |
| 98482_at   | 0.204 | 0.922 | 0.890 | 0.973 | 0.899 |
| 98483_at   | 0.389 | 1.048 | 0.995 | 1.058 | 1.005 |
| 98484_at   | 0.151 | 0.902 | 0.961 | 0.878 | 0.891 |
| 98485_at   | 0.301 | 1.311 | 1.117 | 1.128 | 1.190 |
| 98486_at   | 0.440 | 0.831 | 0.782 | 0.883 | 0.816 |
| 98488_at   | 0.355 | 1.110 | 0.925 | 1.615 | 0.941 |
| 98489_at   | 0.359 | 0.921 | 0.936 | 0.933 | 0.943 |
| 98490_at   | 0.323 | 0.991 | 1.119 | 1.118 | 1.238 |
| 98491_at   | 0.377 | 0.982 | 1.100 | 1.022 | 1.099 |
| 98492_at   | 0.117 | 1.061 | 1.214 | 1.069 | 1.093 |
| 98493_at   | 0.176 | 0.985 | 1.080 | 0.987 | 1.056 |
| 98495_at   | 0.280 | 1.033 | 1.075 | 1.007 | 1.107 |
| 98496_at   | 0.248 | 1.030 | 0.979 | 1.156 | 0.985 |
| 98497_at   | 0.410 | 0.895 | 0.818 | 0.892 | 0.832 |
| 98498_at   | 0.219 | 1.013 | 1.093 | 0.998 | 1.066 |
| 98499_s_at | 0.123 | 0.861 | 0.964 | 0.969 | 1.006 |
| 98500_at   | 0.126 | 1.315 | 1.918 | 1.113 | 1.517 |
| 98501_at   | 0.488 | 0.911 | 0.890 | 0.928 | 0.905 |
| 98502_at   | 0.193 | 0.963 | 0.998 | 1.026 | 1.067 |
| 98503_at   | 0.417 | 1.232 | 1.221 | 1.066 | 1.340 |
| 98504_at   | 0.438 | 1.130 | 1.086 | 0.997 | 1.123 |
| 98505_i_at | 0.378 | 1.006 | 1.086 | 1.040 | 1.005 |
| 98506_r_at | 0.358 | 1.078 | 1.100 | 1.010 | 1.015 |
| 98507_at   | 0.103 | 0.999 | 0.767 | 1.133 | 0.761 |
| 98508_s_at | 0.417 | 1.008 | 1.142 | 1.031 | 1.143 |
| 98509_at   | 0.297 | 1.222 | 1.129 | 1.025 | 1.118 |
| 98511_at   | 0.475 | 0.935 | 0.955 | 0.989 | 0.948 |
| 98512_at   | 0.505 | 1.002 | 0.972 | 1.014 | 0.970 |
| 98513_at   | 0.309 | 0.994 | 0.977 | 0.988 | 0.944 |
| 98514_at   | 0.452 | 0.967 | 0.974 | 0.953 | 1.013 |
| 98515_at   | 0.272 | 1.116 | 1.095 | 0.979 | 1.216 |
| 98516_at   | 0.053 | 1.197 | 1.140 | 1.178 | 0.958 |
| 98518_f_at | 0.407 | 0.934 | 0.901 | 1.277 | 0.888 |
| 98519_r_at | 0.465 | 0.780 | 0.706 | 0.829 | 0.764 |
| 98521_at   | 0.197 | 1.148 | 1.212 | 0.938 | 1.203 |
| 98522_at   | 0.275 | 1.165 | 1.173 | 1.064 | 1.170 |
| 98523_at   | 0.470 | 0.822 | 0.767 | 0.863 | 0.801 |
| 98524_f_at | 0.207 | 0.811 | 0.981 | 0.645 | 1.373 |
| 98525_f_at | 0.377 | 1.335 | 1.199 | 0.968 | 1.174 |
| 98526_r_at | 0.411 | 0.877 | 0.808 | 0.896 | 0.865 |

|            |       |       |       |       |       |
|------------|-------|-------|-------|-------|-------|
| 98527_at   | 0.370 | 0.891 | 0.845 | 1.010 | 0.893 |
| 98528_at   | 0.385 | 1.008 | 1.025 | 0.974 | 0.956 |
| 98529_at   | 0.438 | 0.888 | 0.837 | 0.899 | 0.890 |
| 98530_at   | 0.298 | 1.082 | 1.004 | 1.000 | 1.038 |
| 98531_g_at | 0.348 | 1.211 | 1.199 | 1.044 | 1.213 |
| 98532_at   | 0.163 | 1.028 | 1.089 | 1.094 | 0.985 |
| 98533_at   | 0.261 | 1.072 | 0.971 | 0.996 | 1.026 |
| 98534_at   | 0.341 | 0.988 | 0.956 | 0.979 | 0.963 |
| 98535_at   | 0.119 | 1.102 | 1.129 | 1.142 | 0.943 |
| 98538_at   | 0.490 | 1.067 | 1.067 | 1.037 | 1.076 |
| 98539_at   | 0.337 | 0.954 | 0.994 | 1.003 | 1.058 |
| 98540_g_at | 0.353 | 1.007 | 1.028 | 0.995 | 1.100 |
| 98543_at   | 0.115 | 1.260 | 2.011 | 1.079 | 1.688 |
| 98544_at   | 0.287 | 1.072 | 1.047 | 1.006 | 1.154 |
| 98545_at   | 0.365 | 1.114 | 1.306 | 1.154 | 1.221 |
| 98547_at   | 0.333 | 0.994 | 0.973 | 0.926 | 0.938 |
| 98549_at   | 0.248 | 0.957 | 0.896 | 0.976 | 0.973 |
| 98550_at   | 0.080 | 1.241 | 1.167 | 0.980 | 1.074 |
| 98552_at   | 0.449 | 0.892 | 0.900 | 0.959 | 0.909 |
| 98553_at   | 0.425 | 1.172 | 1.133 | 1.058 | 1.109 |
| 98554_at   | 0.278 | 0.914 | 0.888 | 0.940 | 0.977 |
| 98555_at   | 0.199 | 1.068 | 0.958 | 1.071 | 1.002 |
| 98556_at   | 0.488 | 0.873 | 0.824 | 0.893 | 0.848 |
| 98557_f_at | 0.240 | 1.076 | 1.155 | 0.985 | 1.133 |
| 98558_r_at | 0.398 | 1.020 | 0.980 | 0.994 | 0.993 |
| 98559_at   | 0.280 | 0.998 | 0.928 | 1.112 | 0.970 |
| 98560_at   | 0.496 | 1.047 | 1.063 | 1.050 | 1.065 |
| 98561_at   | 0.397 | 0.897 | 0.904 | 0.947 | 0.917 |
| 98562_at   | 0.022 | 1.230 | 2.730 | 1.185 | 1.612 |
| 98563_f_at | 0.260 | 1.006 | 1.052 | 0.980 | 0.949 |
| 98564_f_at | 0.067 | 1.076 | 1.253 | 0.972 | 1.186 |
| 98565_at   | 0.441 | 0.949 | 0.885 | 0.931 | 0.874 |
| 98568_at   | 0.219 | 0.865 | 0.847 | 0.917 | 0.954 |
| 98569_at   | 0.444 | 0.944 | 0.960 | 0.977 | 0.960 |
| 98570_at   | 0.309 | 0.972 | 1.006 | 1.087 | 0.993 |
| 98571_s_at | 0.194 | 1.063 | 1.131 | 1.014 | 1.165 |
| 98572_at   | 0.075 | 1.113 | 1.252 | 0.928 | 1.005 |
| 98573_r_at | 0.364 | 1.165 | 1.251 | 1.012 | 1.166 |
| 98574_at   | 0.380 | 1.124 | 1.094 | 1.058 | 1.051 |
| 98575_at   | 0.211 | 0.988 | 0.804 | 1.298 | 0.806 |
| 98577_f_at | 0.194 | 0.699 | 0.709 | 0.566 | 1.423 |
| 98578_at   | 0.238 | 0.865 | 0.876 | 0.982 | 0.846 |
| 98579_at   | 0.081 | 1.010 | 0.955 | 0.977 | 0.830 |
| 98580_at   | 0.441 | 1.045 | 1.042 | 1.052 | 1.032 |
| 98582_at   | 0.463 | 0.920 | 0.917 | 0.969 | 0.892 |
| 98583_at   | 0.277 | 0.881 | 0.820 | 0.924 | 0.846 |
| 98586_at   | 0.337 | 1.136 | 1.098 | 1.033 | 1.083 |

|            |       |       |       |       |       |
|------------|-------|-------|-------|-------|-------|
| 98587_at   | 0.380 | 1.178 | 1.129 | 1.071 | 1.151 |
| 98588_at   | 0.170 | 1.062 | 1.006 | 1.127 | 1.104 |
| 98589_at   | 0.268 | 1.043 | 1.072 | 1.032 | 1.207 |
| 98590_at   | 0.183 | 0.807 | 0.724 | 0.666 | 0.632 |
| 98593_at   | 0.359 | 1.087 | 1.169 | 1.011 | 1.083 |
| 98594_at   | 0.354 | 1.099 | 1.063 | 0.922 | 1.120 |
| 98595_at   | 0.346 | 1.255 | 1.310 | 1.210 | 1.176 |
| 98596_s_at | 0.378 | 0.952 | 0.921 | 0.975 | 0.890 |
| 98597_at   | 0.091 | 0.941 | 0.890 | 0.934 | 1.042 |
| 98598_at   | 0.235 | 0.867 | 0.871 | 0.909 | 0.959 |
| 98599_at   | 0.226 | 0.924 | 0.859 | 0.900 | 0.944 |
| 98600_at   | 0.318 | 1.078 | 1.104 | 1.124 | 1.095 |
| 98602_at   | 0.424 | 0.965 | 0.941 | 0.950 | 0.924 |
| 98603_s_at | 0.290 | 0.866 | 0.864 | 0.930 | 0.965 |
| 98604_at   | 0.096 | 1.206 | 1.196 | 1.048 | 1.196 |
| 98605_at   | 0.477 | 0.982 | 0.997 | 0.996 | 0.971 |
| 98606_s_at | 0.459 | 0.959 | 1.068 | 1.013 | 1.059 |
| 98608_at   | 0.084 | 1.141 | 1.233 | 1.040 | 1.193 |
| 98609_at   | 0.282 | 1.003 | 1.018 | 1.038 | 1.088 |
| 98610_at   | 0.260 | 0.938 | 1.038 | 0.915 | 0.992 |
| 98612_at   | 0.306 | 0.832 | 0.839 | 0.962 | 0.821 |
| 98613_at   | 0.359 | 1.209 | 1.213 | 1.112 | 1.307 |
| 98614_at   | 0.441 | 1.087 | 1.000 | 1.059 | 1.071 |
| 98615_at   | 0.185 | 1.143 | 1.505 | 1.083 | 1.351 |
| 98616_f_at | 0.125 | 1.375 | 1.059 | 1.097 | 1.300 |
| 98617_at   | 0.135 | 0.968 | 0.985 | 0.970 | 0.898 |
| 98618_at   | 0.246 | 0.973 | 0.991 | 0.971 | 1.002 |
| 98619_at   | 0.203 | 0.989 | 1.039 | 1.003 | 1.033 |
| 98621_at   | 0.483 | 0.909 | 0.866 | 0.936 | 0.889 |
| 98622_at   | 0.470 | 0.845 | 0.810 | 0.846 | 0.843 |
| 98623_g_at | 0.047 | 0.923 | 0.855 | 1.016 | 0.894 |
| 98624_at   | 0.379 | 0.962 | 1.033 | 1.031 | 1.015 |
| 98625_s_at | 0.314 | 1.069 | 1.138 | 0.960 | 1.122 |
| 98626_at   | 0.093 | 1.175 | 1.267 | 1.009 | 1.345 |
| 98627_at   | 0.198 | 1.001 | 0.910 | 0.874 | 1.077 |
| 98628_f_at | 0.262 | 1.255 | 1.379 | 1.022 | 1.309 |
| 98629_f_at | 0.191 | 1.276 | 1.393 | 0.978 | 1.318 |
| 98630_at   | 0.238 | 0.803 | 0.834 | 0.910 | 0.841 |
| 98631_g_at | 0.207 | 0.752 | 0.970 | 0.975 | 0.920 |
| 98632_at   | 0.239 | 0.941 | 0.945 | 1.093 | 0.997 |
| 98633_at   | 0.184 | 1.155 | 0.995 | 1.050 | 1.068 |
| 98635_at   | 0.145 | 1.094 | 1.072 | 0.981 | 1.084 |
| 98726_at   | 0.189 | 0.928 | 0.872 | 0.954 | 0.905 |
| 98727_at   | 0.496 | 0.869 | 0.865 | 0.925 | 0.856 |
| 98728_at   | 0.444 | 0.850 | 0.808 | 0.867 | 0.820 |
| 98729_at   | 0.390 | 0.855 | 0.864 | 0.952 | 0.875 |
| 98730_at   | 0.438 | 0.928 | 0.858 | 0.911 | 0.860 |

|            |       |       |       |       |       |
|------------|-------|-------|-------|-------|-------|
| 98731_at   | 0.089 | 0.778 | 0.825 | 1.041 | 0.819 |
| 98732_at   | 0.339 | 0.913 | 0.849 | 0.904 | 0.899 |
| 98756_at   | 0.314 | 0.917 | 0.940 | 0.976 | 0.982 |
| 98758_at   | 0.147 | 1.000 | 1.272 | 1.088 | 0.890 |
| 98759_f_at | 0.361 | 1.118 | 1.150 | 1.067 | 1.083 |
| 98760_at   | 0.295 | 0.815 | 0.747 | 0.950 | 0.775 |
| 98761_i_at | 0.478 | 1.018 | 1.072 | 0.941 | 1.086 |
| 98762_f_at | 0.456 | 0.963 | 0.969 | 0.923 | 0.979 |
| 98763_at   | 0.463 | 0.966 | 0.940 | 0.956 | 0.927 |
| 98764_at   | 0.382 | 0.949 | 0.951 | 0.949 | 0.913 |
| 98765_f_at | 0.247 | 0.911 | 1.253 | 0.930 | 0.925 |
| 98766_at   | 0.239 | 0.884 | 0.971 | 0.998 | 0.960 |
| 98767_at   | 0.281 | 1.328 | 1.210 | 1.088 | 1.288 |
| 98768_at   | 0.280 | 1.204 | 1.179 | 1.087 | 1.282 |
| 98770_at   | 0.477 | 0.890 | 0.892 | 0.914 | 0.898 |
| 98771_at   | 0.366 | 0.873 | 0.854 | 0.967 | 0.863 |
| 98772_at   | 0.183 | 0.930 | 1.172 | 1.134 | 0.789 |
| 98773_s_at | 0.360 | 0.970 | 0.917 | 0.921 | 0.908 |
| 98774_at   | 0.354 | 0.982 | 0.914 | 0.972 | 0.973 |
| 98775_at   | 0.157 | 0.889 | 0.945 | 0.951 | 1.052 |
| 98776_at   | 0.299 | 0.920 | 0.957 | 0.968 | 0.923 |
| 98777_at   | 0.497 | 0.913 | 0.893 | 0.948 | 0.909 |
| 98778_at   | 0.372 | 0.855 | 0.834 | 0.934 | 0.870 |
| 98779_at   | 0.438 | 0.848 | 0.812 | 0.913 | 0.819 |
| 98780_at   | 0.379 | 0.830 | 0.800 | 0.921 | 0.809 |
| 98781_at   | 0.441 | 0.949 | 0.913 | 0.960 | 0.939 |
| 98782_at   | 0.285 | 0.966 | 0.900 | 1.006 | 0.992 |
| 98783_at   | 0.496 | 0.952 | 0.961 | 0.971 | 0.941 |
| 98784_at   | 0.376 | 0.862 | 0.849 | 0.922 | 0.858 |
| 98785_at   | 0.367 | 0.791 | 0.730 | 0.768 | 0.729 |
| 98786_at   | 0.468 | 0.838 | 0.820 | 0.908 | 0.831 |
| 98787_at   | 0.445 | 0.856 | 0.797 | 0.877 | 0.823 |
| 98788_at   | 0.275 | 0.906 | 0.803 | 0.919 | 0.868 |
| 98789_at   | 0.273 | 0.840 | 0.827 | 0.937 | 0.860 |
| 98790_s_at | 0.117 | 1.131 | 0.987 | 0.973 | 0.989 |
| 98791_at   | 0.495 | 0.910 | 0.879 | 0.952 | 0.881 |
| 98792_at   | 0.384 | 0.866 | 0.886 | 0.886 | 0.864 |
| 98793_at   | 0.431 | 0.831 | 0.822 | 0.927 | 0.827 |
| 98794_at   | 0.196 | 0.950 | 0.942 | 1.023 | 0.962 |
| 98795_at   | 0.419 | 0.857 | 0.848 | 0.948 | 0.871 |
| 98796_at   | 0.299 | 0.872 | 0.837 | 0.957 | 0.905 |
| 98797_at   | 0.378 | 0.861 | 0.845 | 0.929 | 0.872 |
| 98798_at   | 0.364 | 0.833 | 0.812 | 0.911 | 0.852 |
| 98799_g_at | 0.499 | 0.892 | 0.860 | 0.917 | 0.885 |
| 98800_at   | 0.497 | 0.842 | 0.817 | 0.856 | 0.829 |
| 98801_at   | 0.171 | 1.006 | 0.953 | 0.995 | 1.081 |
| 98802_at   | 0.318 | 1.037 | 0.970 | 1.054 | 0.995 |

|            |       |       |       |       |       |
|------------|-------|-------|-------|-------|-------|
| 98803_at   | 0.184 | 0.904 | 0.805 | 0.957 | 0.848 |
| 98804_at   | 0.208 | 0.877 | 0.864 | 0.952 | 0.933 |
| 98805_at   | 0.400 | 0.825 | 0.819 | 0.894 | 0.814 |
| 98806_s_at | 0.260 | 0.961 | 0.909 | 1.028 | 0.925 |
| 98807_at   | 0.355 | 0.859 | 0.854 | 0.915 | 0.849 |
| 98808_at   | 0.328 | 0.835 | 0.809 | 0.913 | 0.862 |
| 98809_s_at | 0.220 | 0.931 | 0.899 | 0.987 | 0.947 |
| 98810_at   | 0.367 | 0.912 | 0.858 | 0.973 | 0.877 |
| 98811_at   | 0.378 | 0.933 | 0.985 | 0.965 | 0.970 |
| 98812_at   | 0.379 | 0.897 | 0.853 | 0.961 | 0.882 |
| 98813_at   | 0.425 | 1.024 | 0.968 | 1.006 | 0.988 |
| 98814_at   | 0.208 | 0.840 | 0.829 | 0.896 | 0.813 |
| 98815_at   | 0.417 | 0.840 | 0.808 | 0.896 | 0.793 |
| 98816_s_at | 0.428 | 0.904 | 0.875 | 0.959 | 0.924 |
| 98817_at   | 0.163 | 0.952 | 1.271 | 0.960 | 0.957 |
| 98818_at   | 0.134 | 0.790 | 0.908 | 0.973 | 1.052 |
| 98819_at   | 0.444 | 0.866 | 0.857 | 0.905 | 0.852 |
| 98820_g_at | 0.409 | 0.993 | 0.949 | 0.988 | 0.959 |
| 98821_at   | 0.402 | 0.905 | 0.866 | 0.902 | 0.912 |
| 98822_at   | 0.235 | 1.028 | 1.195 | 0.935 | 1.043 |
| 98823_at   | 0.344 | 0.953 | 0.983 | 1.043 | 0.988 |
| 98824_at   | 0.305 | 0.885 | 0.837 | 0.949 | 0.847 |
| 98825_at   | 0.347 | 0.864 | 0.832 | 0.938 | 0.851 |
| 98826_at   | 0.481 | 0.902 | 0.908 | 0.929 | 0.897 |
| 98827_i_at | 0.232 | 0.908 | 0.867 | 0.933 | 0.936 |
| 98828_at   | 0.345 | 0.916 | 0.934 | 1.014 | 0.990 |
| 98829_at   | 0.378 | 0.925 | 0.876 | 0.910 | 0.902 |
| 98830_at   | 0.354 | 0.887 | 0.879 | 0.941 | 0.883 |
| 98831_at   | 0.209 | 1.075 | 0.946 | 1.099 | 0.978 |
| 98832_at   | 0.472 | 0.822 | 0.795 | 0.852 | 0.826 |
| 98833_at   | 0.454 | 1.159 | 1.074 | 1.035 | 1.066 |
| 98834_at   | 0.331 | 0.963 | 0.980 | 0.982 | 1.014 |
| 98835_at   | 0.353 | 0.923 | 0.918 | 0.934 | 1.003 |
| 98836_at   | 0.390 | 0.844 | 0.863 | 0.861 | 0.841 |
| 98837_at   | 0.334 | 0.897 | 0.841 | 0.924 | 0.933 |
| 98838_at   | 0.463 | 0.940 | 0.913 | 0.956 | 0.936 |
| 98839_at   | 0.014 | 0.895 | 0.841 | 1.019 | 0.899 |
| 98840_at   | 0.056 | 1.033 | 0.926 | 1.028 | 1.044 |
| 98841_at   | 0.176 | 0.969 | 0.937 | 0.942 | 1.031 |
| 98842_at   | 0.465 | 0.970 | 0.984 | 0.963 | 0.955 |
| 98843_at   | 0.314 | 0.938 | 0.907 | 1.024 | 0.912 |
| 98844_at   | 0.422 | 0.828 | 0.741 | 0.865 | 0.785 |
| 98845_at   | 0.481 | 0.919 | 0.920 | 0.932 | 0.914 |
| 98846_f_at | 0.303 | 0.886 | 0.846 | 0.978 | 0.844 |
| 98847_at   | 0.396 | 0.887 | 0.821 | 0.975 | 0.864 |
| 98848_at   | 0.075 | 1.020 | 0.971 | 1.218 | 0.915 |
| 98849_at   | 0.050 | 1.100 | 0.947 | 0.930 | 0.944 |



|            |       |       |       |       |       |
|------------|-------|-------|-------|-------|-------|
| 98850_at   | 0.212 | 0.883 | 0.911 | 0.932 | 0.947 |
| 98851_at   | 0.505 | 0.850 | 0.833 | 0.882 | 0.801 |
| 98852_at   | 0.443 | 0.874 | 0.868 | 0.910 | 0.904 |
| 98853_at   | 0.308 | 1.109 | 0.962 | 1.051 | 1.068 |
| 98854_at   | 0.458 | 0.932 | 0.900 | 0.963 | 0.939 |
| 98855_r_at | 0.382 | 1.124 | 1.095 | 1.020 | 1.140 |
| 98856_at   | 0.334 | 0.825 | 0.837 | 0.945 | 0.848 |
| 98857_at   | 0.484 | 1.029 | 1.029 | 1.090 | 1.025 |
| 98858_at   | 0.349 | 0.829 | 0.794 | 0.905 | 0.861 |
| 98859_at   | 0.106 | 0.953 | 1.335 | 1.171 | 1.128 |
| 98860_at   | 0.160 | 1.043 | 0.960 | 1.114 | 0.897 |
| 98861_at   | 0.312 | 0.863 | 0.821 | 0.935 | 0.858 |
| 98862_at   | 0.205 | 0.851 | 0.758 | 0.894 | 0.786 |
| 98863_at   | 0.320 | 0.884 | 0.809 | 0.904 | 0.873 |
| 98864_s_at | 0.293 | 0.920 | 0.887 | 0.953 | 0.952 |
| 98865_at   | 0.168 | 0.890 | 0.882 | 0.993 | 0.885 |
| 98866_at   | 0.384 | 0.811 | 0.801 | 0.893 | 0.839 |
| 98867_at   | 0.368 | 0.863 | 0.777 | 0.837 | 0.834 |
| 98868_at   | 0.220 | 0.895 | 0.943 | 0.884 | 0.999 |
| 98869_g_at | 0.278 | 0.893 | 0.968 | 1.002 | 0.919 |
| 98870_at   | 0.255 | 0.852 | 0.800 | 0.925 | 0.849 |
| 98871_at   | 0.342 | 0.892 | 0.885 | 0.978 | 0.886 |
| 98872_at   | 0.323 | 0.990 | 0.918 | 0.986 | 0.948 |
| 98873_at   | 0.445 | 0.839 | 0.822 | 0.892 | 0.834 |
| 98874_at   | 0.411 | 0.857 | 0.872 | 0.948 | 0.872 |
| 98875_at   | 0.193 | 0.964 | 0.978 | 1.021 | 0.963 |
| 98876_at   | 0.219 | 1.011 | 1.007 | 0.972 | 1.047 |
| 98878_r_at | 0.470 | 0.821 | 0.758 | 0.844 | 0.798 |
| 98880_at   | 0.411 | 0.988 | 0.946 | 0.945 | 0.969 |
| 98881_at   | 0.224 | 1.014 | 1.004 | 1.022 | 1.182 |
| 98882_s_at | 0.416 | 1.041 | 1.035 | 0.999 | 1.013 |
| 98883_r_at | 0.427 | 0.882 | 0.912 | 0.922 | 0.878 |
| 98884_r_at | 0.274 | 1.272 | 1.168 | 1.060 | 1.161 |
| 98886_at   | 0.461 | 0.936 | 0.912 | 0.965 | 0.928 |
| 98887_at   | 0.502 | 1.077 | 1.084 | 1.050 | 1.076 |
| 98889_at   | 0.486 | 0.899 | 0.869 | 0.939 | 0.898 |
| 98890_at   | 0.136 | 0.913 | 0.838 | 0.957 | 0.902 |
| 98891_at   | 0.417 | 1.092 | 1.154 | 1.101 | 1.191 |
| 98892_at   | 0.158 | 1.081 | 1.015 | 1.317 | 1.064 |
| 98893_at   | 0.475 | 1.287 | 1.334 | 1.114 | 1.376 |
| 98894_at   | 0.472 | 1.104 | 1.131 | 1.103 | 1.103 |
| 98896_at   | 0.421 | 1.010 | 0.986 | 1.006 | 0.982 |
| 98901_at   | 0.246 | 1.144 | 1.114 | 0.991 | 1.161 |
| 98902_at   | 0.434 | 0.917 | 0.882 | 0.968 | 0.884 |
| 98903_at   | 0.398 | 0.878 | 0.844 | 0.905 | 0.864 |
| 98904_at   | 0.497 | 1.151 | 1.189 | 1.088 | 1.170 |
| 98905_at   | 0.420 | 1.084 | 1.135 | 0.948 | 1.170 |

|            |       |       |       |       |       |
|------------|-------|-------|-------|-------|-------|
| 98906_at   | 0.345 | 1.129 | 1.023 | 1.123 | 1.075 |
| 98908_at   | 0.425 | 1.221 | 1.241 | 1.062 | 1.225 |
| 98909_at   | 0.265 | 1.142 | 1.129 | 1.159 | 1.099 |
| 98910_at   | 0.232 | 0.997 | 0.948 | 0.952 | 0.960 |
| 98911_at   | 0.140 | 1.081 | 1.130 | 1.043 | 0.978 |
| 98912_at   | 0.308 | 1.455 | 1.348 | 1.193 | 1.269 |
| 98914_at   | 0.050 | 1.057 | 1.017 | 0.958 | 1.066 |
| 98915_at   | 0.159 | 1.479 | 1.728 | 1.220 | 1.859 |
| 98916_at   | 0.371 | 1.000 | 0.967 | 0.955 | 0.993 |
| 98917_at   | 0.305 | 1.126 | 1.219 | 0.920 | 1.331 |
| 98918_at   | 0.072 | 1.072 | 1.247 | 1.031 | 1.080 |
| 98919_at   | 0.468 | 0.807 | 0.771 | 0.857 | 0.775 |
| 98920_g_at | 0.389 | 1.000 | 1.028 | 1.019 | 1.133 |
| 98921_at   | 0.267 | 0.995 | 1.072 | 1.049 | 1.022 |
| 98922_at   | 0.367 | 0.956 | 0.951 | 0.998 | 1.002 |
| 98923_at   | 0.458 | 1.027 | 1.005 | 0.984 | 1.063 |
| 98924_at   | 0.231 | 0.835 | 0.717 | 1.057 | 0.874 |
| 98925_at   | 0.301 | 0.925 | 0.912 | 1.047 | 0.917 |
| 98926_at   | 0.179 | 1.301 | 1.178 | 1.059 | 1.073 |
| 98927_at   | 0.339 | 1.084 | 1.021 | 0.979 | 1.094 |
| 98928_at   | 0.068 | 1.058 | 1.219 | 1.030 | 1.167 |
| 98929_at   | 0.378 | 0.867 | 0.898 | 0.951 | 0.904 |
| 98930_at   | 0.145 | 0.915 | 1.080 | 0.919 | 1.018 |
| 98931_at   | 0.510 | 1.241 | 1.290 | 1.197 | 1.316 |
| 98932_at   | 0.375 | 0.914 | 0.833 | 0.945 | 0.836 |
| 98933_at   | 0.181 | 1.114 | 1.036 | 0.980 | 1.133 |
| 98934_at   | 0.308 | 0.853 | 0.793 | 0.895 | 0.872 |
| 98936_at   | 0.322 | 1.072 | 1.044 | 1.002 | 1.066 |
| 98937_at   | 0.254 | 1.163 | 1.315 | 1.092 | 1.191 |
| 98938_at   | 0.091 | 0.971 | 1.026 | 0.878 | 1.077 |
| 98940_at   | 0.423 | 0.848 | 0.854 | 0.914 | 0.840 |
| 98941_r_at | 0.490 | 0.735 | 0.715 | 0.761 | 0.658 |
| 98942_r_at | 0.405 | 1.077 | 0.971 | 0.957 | 1.067 |
| 98943_at   | 0.499 | 0.839 | 0.835 | 0.858 | 0.832 |
| 98944_at   | 0.081 | 1.206 | 1.533 | 1.068 | 1.152 |
| 98945_at   | 0.292 | 1.119 | 1.118 | 1.103 | 1.210 |
| 98946_at   | 0.246 | 1.367 | 1.366 | 1.061 | 1.473 |
| 98947_at   | 0.369 | 0.891 | 0.854 | 0.992 | 0.845 |
| 98948_at   | 0.118 | 1.023 | 1.059 | 0.949 | 1.072 |
| 98950_at   | 0.359 | 1.069 | 1.182 | 1.056 | 1.160 |
| 98951_at   | 0.441 | 0.986 | 0.957 | 0.940 | 0.999 |
| 98952_at   | 0.329 | 1.035 | 0.950 | 1.008 | 1.010 |
| 98953_at   | 0.193 | 1.181 | 1.132 | 1.065 | 1.098 |
| 98954_f_at | 0.315 | 0.902 | 0.878 | 0.979 | 0.937 |
| 98955_at   | 0.458 | 0.894 | 0.894 | 0.956 | 0.884 |
| 98956_at   | 0.154 | 1.063 | 1.293 | 1.039 | 1.052 |
| 98957_at   | 0.359 | 0.978 | 0.934 | 1.016 | 0.983 |

|            |       |       |       |       |       |
|------------|-------|-------|-------|-------|-------|
| 98958_at   | 0.051 | 0.857 | 0.854 | 0.876 | 1.009 |
| 98959_at   | 0.383 | 0.946 | 0.983 | 0.978 | 0.967 |
| 98960_s_at | 0.051 | 0.865 | 0.885 | 0.952 | 0.967 |
| 98961_at   | 0.095 | 1.071 | 0.997 | 1.061 | 1.098 |
| 98962_at   | 0.347 | 0.854 | 0.842 | 0.949 | 0.823 |
| 98963_at   | 0.161 | 1.088 | 1.141 | 1.020 | 1.209 |
| 98965_at   | 0.093 | 1.047 | 1.026 | 1.035 | 1.140 |
| 98966_at   | 0.331 | 1.016 | 0.965 | 1.091 | 0.997 |
| 98967_at   | 0.385 | 0.932 | 0.908 | 1.011 | 0.901 |
| 98968_at   | 0.180 | 1.039 | 1.064 | 0.975 | 1.084 |
| 98969_at   | 0.370 | 0.991 | 0.957 | 1.002 | 0.943 |
| 98970_at   | 0.236 | 0.868 | 0.901 | 0.962 | 0.966 |
| 98971_at   | 0.348 | 0.849 | 0.820 | 0.914 | 0.853 |
| 98972_at   | 0.500 | 1.092 | 1.111 | 1.083 | 1.101 |
| 98973_at   | 0.367 | 1.010 | 0.982 | 1.026 | 1.035 |
| 98974_at   | 0.130 | 0.791 | 0.974 | 0.807 | 0.830 |
| 98975_at   | 0.332 | 1.034 | 1.112 | 1.053 | 1.126 |
| 98976_at   | 0.303 | 1.183 | 1.074 | 1.076 | 1.091 |
| 98977_at   | 0.361 | 0.931 | 0.958 | 0.943 | 0.911 |
| 98979_at   | 0.354 | 1.019 | 1.080 | 0.943 | 1.074 |
| 98980_at   | 0.020 | 0.916 | 1.194 | 0.919 | 0.982 |
| 98981_s_at | 0.180 | 1.292 | 1.201 | 1.045 | 1.260 |
| 98982_at   | 0.279 | 1.006 | 0.989 | 1.005 | 1.082 |
| 98983_at   | 0.200 | 1.010 | 0.929 | 1.012 | 0.954 |
| 98984_f_at | 0.245 | 1.068 | 0.965 | 1.164 | 1.060 |
| 98987_at   | 0.388 | 0.937 | 0.929 | 0.970 | 0.894 |
| 98988_at   | 0.350 | 1.279 | 1.111 | 1.131 | 1.245 |
| 98989_at   | 0.221 | 1.046 | 1.208 | 1.080 | 1.086 |
| 98990_at   | 0.480 | 0.930 | 0.927 | 0.962 | 0.925 |
| 98991_at   | 0.409 | 0.943 | 0.872 | 0.923 | 0.929 |
| 98992_at   | 0.438 | 1.083 | 1.115 | 1.073 | 1.066 |
| 98993_at   | 0.072 | 1.208 | 1.383 | 1.044 | 1.332 |
| 98994_at   | 0.233 | 1.142 | 1.114 | 1.035 | 1.092 |
| 98995_at   | 0.490 | 0.984 | 0.967 | 0.986 | 0.989 |
| 98996_at   | 0.339 | 1.277 | 1.268 | 1.138 | 1.496 |
| 98997_f_at | 0.502 | 0.776 | 0.747 | 0.814 | 0.741 |
| 98998_r_at | 0.405 | 0.853 | 0.810 | 0.900 | 0.856 |
| 98999_at   | 0.496 | 1.027 | 1.052 | 0.986 | 1.045 |
| 99000_at   | 0.504 | 0.964 | 0.951 | 0.961 | 0.956 |
| 99001_at   | 0.276 | 1.018 | 0.957 | 0.999 | 1.065 |
| 99004_r_at | 0.233 | 0.885 | 0.788 | 0.942 | 0.911 |
| 99005_at   | 0.316 | 1.009 | 0.977 | 0.991 | 1.052 |
| 99006_at   | 0.508 | 0.817 | 0.797 | 0.823 | 0.795 |
| 99007_at   | 0.225 | 1.038 | 1.021 | 1.060 | 0.999 |
| 99009_at   | 0.354 | 1.108 | 1.096 | 1.101 | 1.142 |
| 99010_at   | 0.330 | 0.972 | 1.011 | 1.231 | 1.025 |
| 99011_at   | 0.295 | 0.915 | 0.955 | 0.913 | 0.964 |

|            |       |       |       |       |       |
|------------|-------|-------|-------|-------|-------|
| 99012_at   | 0.449 | 0.916 | 0.872 | 0.973 | 0.898 |
| 99013_f_at | 0.262 | 1.150 | 1.132 | 0.971 | 1.178 |
| 99014_at   | 0.191 | 1.059 | 0.953 | 1.005 | 1.014 |
| 99015_at   | 0.461 | 0.926 | 0.928 | 0.947 | 0.899 |
| 99016_at   | 0.417 | 0.858 | 0.831 | 0.891 | 0.877 |
| 99018_at   | 0.480 | 0.988 | 0.989 | 1.015 | 1.006 |
| 99019_at   | 0.110 | 1.271 | 1.263 | 1.301 | 1.080 |
| 99020_at   | 0.377 | 0.827 | 0.843 | 0.919 | 0.881 |
| 99021_at   | 0.193 | 0.956 | 0.915 | 1.043 | 0.992 |
| 99023_at   | 0.265 | 0.891 | 0.934 | 0.975 | 1.019 |
| 99024_at   | 0.310 | 1.149 | 0.982 | 1.037 | 1.144 |
| 99025_at   | 0.443 | 1.213 | 1.158 | 1.054 | 1.177 |
| 99026_at   | 0.320 | 0.799 | 0.845 | 0.940 | 0.820 |
| 99027_at   | 0.160 | 1.263 | 1.109 | 1.130 | 1.153 |
| 99028_at   | 0.249 | 1.166 | 1.174 | 1.045 | 1.157 |
| 99029_at   | 0.334 | 1.159 | 1.084 | 1.067 | 1.099 |
| 99030_at   | 0.205 | 1.009 | 1.146 | 0.947 | 1.261 |
| 99031_at   | 0.357 | 1.083 | 1.032 | 1.027 | 1.092 |
| 99032_at   | 0.317 | 0.988 | 1.107 | 1.310 | 1.018 |
| 99033_at   | 0.448 | 0.929 | 0.889 | 0.963 | 0.894 |
| 99034_at   | 0.291 | 1.150 | 1.073 | 1.099 | 1.052 |
| 99035_at   | 0.327 | 0.840 | 0.887 | 0.977 | 0.843 |
| 99036_s_at | 0.309 | 0.860 | 0.844 | 0.915 | 0.875 |
| 99037_at   | 0.444 | 0.898 | 0.869 | 0.923 | 0.910 |
| 99038_at   | 0.290 | 1.069 | 1.157 | 0.991 | 1.196 |
| 99039_g_at | 0.436 | 1.208 | 1.302 | 1.164 | 1.383 |
| 99040_at   | 0.314 | 1.056 | 0.998 | 1.100 | 1.123 |
| 99041_at   | 0.375 | 0.909 | 0.912 | 0.940 | 0.951 |
| 99042_s_at | 0.174 | 0.958 | 0.813 | 1.015 | 0.910 |
| 99043_s_at | 0.459 | 0.886 | 0.840 | 0.934 | 0.856 |
| 99044_at   | 0.076 | 0.928 | 0.940 | 1.051 | 0.904 |
| 99045_at   | 0.206 | 0.956 | 0.936 | 1.073 | 0.947 |
| 99046_at   | 0.281 | 0.923 | 0.938 | 0.950 | 0.882 |
| 99047_at   | 0.390 | 0.997 | 0.962 | 1.006 | 1.026 |
| 99048_g_at | 0.250 | 0.854 | 0.822 | 0.905 | 0.881 |
| 99049_at   | 0.212 | 1.021 | 1.029 | 1.025 | 1.142 |
| 99050_at   | 0.261 | 0.885 | 0.869 | 0.977 | 0.925 |
| 99051_at   | 0.142 | 0.993 | 1.314 | 1.016 | 1.227 |
| 99052_at   | 0.390 | 1.193 | 1.235 | 1.183 | 1.188 |
| 99053_at   | 0.353 | 0.936 | 0.896 | 0.876 | 0.975 |
| 99054_at   | 0.245 | 0.966 | 0.914 | 0.955 | 0.974 |
| 99055_at   | 0.458 | 0.971 | 0.999 | 0.953 | 1.016 |
| 99056_at   | 0.472 | 1.067 | 1.102 | 1.061 | 1.079 |
| 99057_at   | 0.241 | 0.881 | 1.008 | 0.953 | 0.899 |
| 99058_at   | 0.392 | 0.913 | 0.931 | 0.907 | 0.871 |
| 99059_at   | 0.036 | 1.062 | 1.084 | 1.075 | 0.945 |
| 99062_at   | 0.244 | 1.132 | 1.054 | 0.998 | 1.138 |

|            |       |       |       |       |       |
|------------|-------|-------|-------|-------|-------|
| 99063_at   | 0.130 | 0.990 | 0.965 | 0.970 | 1.050 |
| 99064_at   | 0.207 | 1.184 | 1.133 | 1.047 | 1.116 |
| 99065_at   | 0.249 | 0.906 | 0.850 | 0.952 | 0.878 |
| 99067_at   | 0.252 | 1.164 | 1.210 | 1.051 | 1.172 |
| 99068_at   | 0.331 | 0.989 | 1.045 | 0.919 | 1.033 |
| 99069_at   | 0.346 | 0.852 | 0.772 | 0.920 | 0.839 |
| 99070_at   | 0.378 | 1.333 | 1.362 | 1.084 | 1.275 |
| 99071_at   | 0.153 | 1.072 | 1.107 | 1.021 | 1.327 |
| 99073_at   | 0.289 | 0.889 | 0.952 | 0.939 | 0.938 |
| 99074_at   | 0.388 | 0.978 | 0.997 | 0.967 | 0.984 |
| 99076_at   | 0.495 | 1.144 | 1.076 | 1.005 | 1.102 |
| 99077_at   | 0.263 | 1.104 | 0.944 | 1.050 | 0.985 |
| 99078_at   | 0.294 | 0.970 | 1.029 | 0.966 | 1.018 |
| 99080_at   | 0.279 | 1.224 | 1.216 | 1.070 | 1.170 |
| 99081_at   | 0.303 | 1.122 | 1.071 | 1.032 | 1.116 |
| 99082_at   | 0.422 | 1.021 | 1.078 | 1.062 | 1.037 |
| 99083_at   | 0.449 | 0.915 | 0.913 | 0.981 | 0.904 |
| 99084_s_at | 0.191 | 0.879 | 0.921 | 0.895 | 0.962 |
| 99085_at   | 0.167 | 0.946 | 1.077 | 1.004 | 1.054 |
| 99086_g_at | 0.084 | 0.922 | 1.003 | 0.964 | 1.100 |
| 99087_at   | 0.460 | 0.920 | 0.949 | 0.957 | 0.941 |
| 99089_at   | 0.429 | 0.979 | 1.053 | 0.990 | 1.018 |
| 99093_at   | 0.204 | 1.072 | 1.104 | 0.972 | 1.008 |
| 99094_at   | 0.257 | 0.880 | 0.900 | 0.966 | 0.944 |
| 99095_at   | 0.275 | 1.257 | 1.115 | 1.089 | 1.227 |
| 99096_at   | 0.324 | 1.123 | 1.155 | 0.996 | 1.118 |
| 99097_at   | 0.365 | 0.880 | 0.885 | 0.930 | 0.869 |
| 99098_at   | 0.367 | 0.890 | 1.048 | 0.918 | 0.882 |
| 99099_at   | 0.211 | 0.971 | 0.969 | 1.035 | 0.908 |
| 99100_at   | 0.160 | 1.117 | 1.008 | 1.021 | 0.985 |
| 99101_at   | 0.255 | 1.199 | 1.244 | 1.031 | 1.210 |
| 99102_at   | 0.497 | 1.025 | 1.048 | 1.005 | 1.083 |
| 99103_at   | 0.323 | 1.122 | 1.110 | 1.058 | 1.016 |
| 99104_at   | 0.302 | 0.464 | 0.330 | 1.254 | 0.376 |
| 99106_at   | 0.226 | 1.113 | 1.277 | 1.012 | 1.245 |
| 99107_at   | 0.231 | 0.896 | 0.938 | 0.988 | 1.064 |
| 99108_s_at | 0.196 | 1.090 | 1.011 | 1.167 | 1.166 |
| 99109_at   | 0.308 | 1.256 | 1.214 | 1.068 | 1.226 |
| 99111_at   | 0.345 | 1.030 | 1.102 | 1.029 | 1.061 |
| 99112_at   | 0.075 | 1.168 | 1.017 | 1.256 | 1.067 |
| 99113_at   | 0.226 | 1.156 | 1.152 | 0.987 | 1.149 |
| 99114_r_at | 0.371 | 0.828 | 0.809 | 0.913 | 0.806 |
| 99115_at   | 0.412 | 1.113 | 1.176 | 1.041 | 1.189 |
| 99118_at   | 0.360 | 0.913 | 0.936 | 0.959 | 0.956 |
| 99119_at   | 0.100 | 0.920 | 1.077 | 0.978 | 0.990 |
| 99120_f_at | 0.190 | 1.518 | 1.450 | 1.206 | 1.391 |
| 99121_at   | 0.417 | 1.061 | 1.004 | 0.932 | 1.024 |

|            |       |       |       |       |       |
|------------|-------|-------|-------|-------|-------|
| 99123_s_at | 0.091 | 0.930 | 1.074 | 0.960 | 1.069 |
| 99124_at   | 0.468 | 0.951 | 0.907 | 0.966 | 0.931 |
| 99126_at   | 0.230 | 1.297 | 1.211 | 0.835 | 1.426 |
| 99127_at   | 0.377 | 1.179 | 1.324 | 1.191 | 1.394 |
| 99128_at   | 0.417 | 0.973 | 1.066 | 1.015 | 1.052 |
| 99129_at   | 0.342 | 1.286 | 1.267 | 1.304 | 1.312 |
| 99130_at   | 0.279 | 0.882 | 0.858 | 0.964 | 0.912 |
| 99133_at   | 0.205 | 1.101 | 1.114 | 1.007 | 1.038 |
| 99134_at   | 0.187 | 1.124 | 1.034 | 1.108 | 1.046 |
| 99135_at   | 0.198 | 1.011 | 1.044 | 0.951 | 1.039 |
| 99136_at   | 0.184 | 1.062 | 0.966 | 1.013 | 1.046 |
| 99138_at   | 0.405 | 0.975 | 0.942 | 1.017 | 0.991 |
| 99139_at   | 0.384 | 1.019 | 1.002 | 1.041 | 1.026 |
| 99140_at   | 0.325 | 1.057 | 1.235 | 1.094 | 1.188 |
| 99141_at   | 0.272 | 1.118 | 1.179 | 1.089 | 1.134 |
| 99142_at   | 0.422 | 1.061 | 1.005 | 0.995 | 1.017 |
| 99143_at   | 0.342 | 1.251 | 1.249 | 1.060 | 1.212 |
| 99144_s_at | 0.210 | 0.973 | 1.183 | 0.956 | 1.200 |
| 99146_at   | 0.210 | 1.074 | 1.122 | 1.048 | 1.190 |
| 99147_at   | 0.342 | 0.977 | 1.029 | 0.986 | 1.014 |
| 99148_at   | 0.380 | 0.911 | 0.969 | 0.994 | 0.914 |
| 99149_at   | 0.091 | 0.981 | 1.141 | 0.940 | 1.221 |
| 99150_at   | 0.475 | 0.967 | 1.004 | 0.941 | 1.019 |
| 99151_at   | 0.173 | 0.968 | 0.900 | 0.918 | 0.990 |
| 99152_at   | 0.188 | 0.979 | 0.929 | 1.062 | 0.932 |
| 99153_at   | 0.495 | 0.953 | 0.958 | 0.951 | 0.996 |
| 99154_s_at | 0.256 | 1.014 | 0.915 | 0.980 | 0.969 |
| 99156_at   | 0.103 | 0.896 | 0.943 | 0.900 | 0.981 |
| 99157_at   | 0.112 | 0.940 | 0.949 | 0.911 | 0.981 |
| 99158_at   | 0.039 | 1.051 | 1.115 | 0.922 | 1.194 |
| 99159_at   | 0.125 | 0.955 | 1.037 | 1.030 | 0.926 |
| 99160_s_at | 0.064 | 0.882 | 0.990 | 1.202 | 0.959 |
| 99161_at   | 0.294 | 1.078 | 1.102 | 1.188 | 1.058 |
| 99162_at   | 0.461 | 1.184 | 1.174 | 1.066 | 1.292 |
| 99163_at   | 0.327 | 1.039 | 1.027 | 1.152 | 1.024 |
| 99164_at   | 0.219 | 1.114 | 1.204 | 0.992 | 1.108 |
| 99166_at   | 0.348 | 0.950 | 1.001 | 0.980 | 1.056 |
| 99167_at   | 0.190 | 0.990 | 1.091 | 0.873 | 1.142 |
| 99168_at   | 0.301 | 1.022 | 1.049 | 1.084 | 1.024 |
| 99169_at   | 0.072 | 1.031 | 0.867 | 1.065 | 0.859 |
| 99171_at   | 0.321 | 0.914 | 0.886 | 0.894 | 0.940 |
| 99172_at   | 0.375 | 1.006 | 0.950 | 1.013 | 0.973 |
| 99175_at   | 0.262 | 1.050 | 1.141 | 1.000 | 1.176 |
| 99176_at   | 0.139 | 1.060 | 1.104 | 0.979 | 1.116 |
| 99178_at   | 0.430 | 1.196 | 1.103 | 1.045 | 1.213 |
| 99179_at   | 0.145 | 1.046 | 1.069 | 0.977 | 1.072 |
| 99180_at   | 0.375 | 1.285 | 1.326 | 1.140 | 1.293 |

|            |       |       |       |       |       |
|------------|-------|-------|-------|-------|-------|
| 99182_at   | 0.221 | 1.003 | 1.058 | 1.018 | 1.083 |
| 99183_at   | 0.319 | 0.987 | 1.076 | 1.058 | 1.095 |
| 99184_at   | 0.112 | 1.033 | 0.970 | 1.098 | 0.984 |
| 99185_at   | 0.346 | 0.957 | 0.938 | 0.893 | 0.921 |
| 99186_at   | 0.233 | 1.003 | 1.068 | 1.007 | 1.074 |
| 99187_f_at | 0.034 | 0.993 | 0.867 | 0.870 | 0.986 |
| 99188_at   | 0.051 | 1.030 | 1.024 | 0.920 | 1.157 |
| 99190_at   | 0.288 | 0.887 | 0.833 | 0.951 | 0.904 |
| 99191_at   | 0.354 | 1.331 | 1.373 | 1.148 | 1.278 |
| 99194_at   | 0.507 | 1.064 | 1.083 | 1.056 | 1.099 |
| 99195_at   | 0.505 | 0.922 | 0.899 | 0.928 | 0.890 |
| 99196_at   | 0.478 | 1.159 | 1.141 | 1.074 | 1.147 |
| 99197_at   | 0.280 | 0.956 | 0.894 | 1.035 | 0.906 |
| 99198_at   | 0.478 | 0.879 | 0.857 | 0.869 | 0.860 |
| 99236_at   | 0.475 | 0.933 | 0.898 | 0.929 | 0.919 |
| 99237_at   | 0.308 | 0.987 | 0.973 | 1.026 | 1.003 |
| 99238_at   | 0.320 | 0.925 | 0.872 | 1.011 | 0.907 |
| 99239_at   | 0.425 | 0.880 | 0.815 | 0.935 | 0.847 |
| 99269_g_at | 0.106 | 0.926 | 1.016 | 0.972 | 0.942 |
| 99320_at   | 0.357 | 0.882 | 0.821 | 0.921 | 0.852 |
| 99321_at   | 0.317 | 0.877 | 0.811 | 0.886 | 0.828 |
| 99322_at   | 0.410 | 1.045 | 1.062 | 1.044 | 1.014 |
| 99323_at   | 0.195 | 0.935 | 0.909 | 1.043 | 0.926 |
| 99324_at   | 0.147 | 0.884 | 0.927 | 0.960 | 0.944 |
| 99325_at   | 0.499 | 0.949 | 0.944 | 0.954 | 0.937 |
| 99326_at   | 0.363 | 0.880 | 0.836 | 0.916 | 0.849 |
| 99327_at   | 0.240 | 0.796 | 0.754 | 0.841 | 0.866 |
| 99328_at   | 0.329 | 0.886 | 0.889 | 0.966 | 0.891 |
| 99329_at   | 0.224 | 0.825 | 0.847 | 1.035 | 0.852 |
| 99330_at   | 0.212 | 1.020 | 1.184 | 1.062 | 1.146 |
| 99331_at   | 0.283 | 0.932 | 0.886 | 1.017 | 0.938 |
| 99332_at   | 0.378 | 0.848 | 0.804 | 0.904 | 0.864 |
| 99333_at   | 0.430 | 0.902 | 0.926 | 0.912 | 0.909 |
| 99334_at   | 0.219 | 0.916 | 0.907 | 0.884 | 0.925 |
| 99335_at   | 0.204 | 0.948 | 0.998 | 0.888 | 1.059 |
| 99336_at   | 0.100 | 1.113 | 1.178 | 0.975 | 1.174 |
| 99337_at   | 0.224 | 1.002 | 0.849 | 1.016 | 0.894 |
| 99338_at   | 0.345 | 0.898 | 0.993 | 0.959 | 0.954 |
| 99339_r_at | 0.274 | 0.986 | 0.934 | 0.994 | 0.990 |
| 99340_at   | 0.175 | 0.974 | 1.076 | 0.911 | 0.971 |
| 99341_r_at | 0.392 | 0.980 | 0.926 | 0.983 | 0.940 |
| 99342_at   | 0.474 | 0.830 | 0.776 | 0.806 | 0.784 |
| 99343_at   | 0.292 | 0.828 | 0.773 | 0.825 | 0.827 |
| 99344_at   | 0.318 | 0.922 | 0.880 | 0.939 | 0.895 |
| 99345_at   | 0.508 | 1.054 | 1.053 | 1.040 | 1.047 |
| 99346_at   | 0.444 | 0.895 | 0.840 | 0.906 | 0.816 |
| 99347_f_at | 0.331 | 0.897 | 0.893 | 0.912 | 0.923 |

|            |       |       |       |       |       |
|------------|-------|-------|-------|-------|-------|
| 99348_r_at | 0.271 | 0.889 | 0.814 | 0.961 | 0.787 |
| 99349_at   | 0.426 | 0.885 | 0.837 | 0.903 | 0.867 |
| 99350_at   | 0.389 | 0.886 | 0.936 | 0.893 | 0.928 |
| 99351_at   | 0.383 | 0.962 | 0.961 | 0.979 | 0.912 |
| 99354_s_at | 0.348 | 0.940 | 0.946 | 1.018 | 0.951 |
| 99355_r_at | 0.264 | 0.921 | 0.874 | 0.940 | 0.888 |
| 99356_r_at | 0.486 | 0.955 | 0.925 | 0.967 | 0.920 |
| 99357_at   | 0.434 | 0.889 | 0.854 | 0.965 | 0.878 |
| 99358_at   | 0.301 | 0.866 | 0.766 | 0.888 | 0.815 |
| 99359_at   | 0.203 | 0.883 | 0.881 | 0.987 | 0.941 |
| 99360_at   | 0.268 | 1.015 | 0.926 | 0.980 | 0.981 |
| 99361_at   | 0.495 | 0.951 | 0.886 | 0.981 | 0.897 |
| 99362_at   | 0.163 | 0.802 | 0.785 | 0.888 | 0.859 |
| 99363_at   | 0.467 | 0.976 | 0.944 | 1.010 | 0.983 |
| 99364_at   | 0.313 | 1.072 | 0.986 | 0.999 | 1.116 |
| 99365_at   | 0.339 | 0.941 | 0.922 | 0.953 | 0.952 |
| 99366_at   | 0.193 | 1.417 | 1.436 | 1.109 | 1.521 |
| 99367_at   | 0.257 | 0.935 | 1.035 | 0.977 | 1.092 |
| 99368_at   | 0.126 | 0.849 | 0.896 | 0.990 | 0.858 |
| 99369_f_at | 0.117 | 0.977 | 1.460 | 0.928 | 1.031 |
| 99370_at   | 0.380 | 0.933 | 0.854 | 0.914 | 0.877 |
| 99371_at   | 0.414 | 0.842 | 0.782 | 0.906 | 0.817 |
| 99372_at   | 0.187 | 0.823 | 0.865 | 0.972 | 0.853 |
| 99373_at   | 0.272 | 0.938 | 0.909 | 1.010 | 0.882 |
| 99374_at   | 0.431 | 0.953 | 0.921 | 0.989 | 0.956 |
| 99375_at   | 0.421 | 0.992 | 1.053 | 1.051 | 1.032 |
| 99376_at   | 0.339 | 0.747 | 0.710 | 0.856 | 0.776 |
| 99377_at   | 0.329 | 0.916 | 0.937 | 0.945 | 0.962 |
| 99378_f_at | 0.321 | 0.922 | 1.096 | 0.967 | 1.019 |
| 99379_f_at | 0.238 | 0.920 | 1.090 | 0.955 | 0.973 |
| 99380_at   | 0.448 | 0.913 | 0.900 | 0.964 | 0.881 |
| 99381_at   | 0.495 | 0.890 | 0.866 | 0.916 | 0.884 |
| 99382_at   | 0.494 | 0.843 | 0.824 | 0.907 | 0.845 |
| 99383_at   | 0.422 | 0.901 | 0.831 | 0.880 | 0.816 |
| 99384_at   | 0.142 | 0.836 | 0.916 | 0.989 | 0.953 |
| 99385_at   | 0.436 | 0.848 | 0.786 | 0.870 | 0.836 |
| 99386_at   | 0.497 | 0.922 | 0.893 | 0.922 | 0.888 |
| 99387_at   | 0.051 | 0.850 | 0.846 | 0.865 | 1.150 |
| 99388_at   | 0.361 | 0.813 | 0.815 | 0.919 | 0.823 |
| 99389_at   | 0.488 | 0.814 | 0.807 | 0.847 | 0.762 |
| 99390_at   | 0.475 | 1.011 | 1.019 | 1.071 | 0.986 |
| 99391_at   | 0.382 | 0.895 | 0.878 | 0.929 | 0.933 |
| 99392_at   | 0.379 | 0.880 | 0.963 | 0.907 | 0.907 |
| 99393_at   | 0.206 | 0.861 | 0.898 | 0.922 | 1.026 |
| 99394_at   | 0.468 | 0.900 | 0.909 | 0.958 | 0.911 |
| 99395_at   | 0.367 | 0.854 | 0.818 | 0.918 | 0.871 |
| 99396_at   | 0.330 | 0.829 | 0.817 | 0.899 | 0.857 |



|            |       |       |       |       |       |
|------------|-------|-------|-------|-------|-------|
| 99397_at   | 0.438 | 0.857 | 0.887 | 0.913 | 0.903 |
| 99398_at   | 0.505 | 0.922 | 0.918 | 0.947 | 0.904 |
| 99399_at   | 0.322 | 0.879 | 0.886 | 0.928 | 0.901 |
| 99400_at   | 0.287 | 0.906 | 0.839 | 0.898 | 0.880 |
| 99401_at   | 0.281 | 0.889 | 0.880 | 0.976 | 0.971 |
| 99402_at   | 0.481 | 0.956 | 0.953 | 0.950 | 0.928 |
| 99403_at   | 0.504 | 0.923 | 0.905 | 0.922 | 0.906 |
| 99404_at   | 0.158 | 0.942 | 0.856 | 0.958 | 0.931 |
| 99405_at   | 0.072 | 1.161 | 4.603 | 0.901 | 1.108 |
| 99406_at   | 0.425 | 0.874 | 0.881 | 0.953 | 0.865 |
| 99407_at   | 0.486 | 0.856 | 0.803 | 0.867 | 0.812 |
| 99408_at   | 0.258 | 0.885 | 0.838 | 0.962 | 0.893 |
| 99409_at   | 0.280 | 0.845 | 0.806 | 0.928 | 0.844 |
| 99410_at   | 0.339 | 0.954 | 0.973 | 1.055 | 0.946 |
| 99411_at   | 0.407 | 0.832 | 0.809 | 0.916 | 0.830 |
| 99412_at   | 0.408 | 0.925 | 0.918 | 0.908 | 0.875 |
| 99413_at   | 0.077 | 0.848 | 1.199 | 0.896 | 1.111 |
| 99414_at   | 0.445 | 0.938 | 0.883 | 0.943 | 0.878 |
| 99415_at   | 0.235 | 0.876 | 0.859 | 0.984 | 0.873 |
| 99416_at   | 0.492 | 0.871 | 0.846 | 0.901 | 0.867 |
| 99417_at   | 0.465 | 0.917 | 0.895 | 0.965 | 0.879 |
| 99418_at   | 0.340 | 0.894 | 0.829 | 0.927 | 0.926 |
| 99419_g_at | 0.481 | 0.866 | 0.878 | 0.875 | 0.841 |
| 99420_at   | 0.322 | 0.935 | 1.423 | 0.919 | 0.923 |
| 99421_at   | 0.264 | 0.847 | 0.865 | 0.961 | 0.890 |
| 99422_at   | 0.425 | 0.909 | 0.898 | 0.914 | 0.914 |
| 99423_at   | 0.124 | 0.821 | 0.850 | 1.004 | 0.818 |
| 99424_at   | 0.285 | 0.937 | 0.922 | 0.978 | 1.002 |
| 99425_at   | 0.327 | 0.856 | 0.908 | 0.897 | 0.895 |
| 99426_at   | 0.387 | 0.923 | 0.836 | 0.943 | 0.834 |
| 99427_at   | 0.386 | 0.875 | 0.885 | 0.974 | 0.913 |
| 99428_at   | 0.411 | 0.836 | 0.768 | 0.878 | 0.763 |
| 99429_at   | 0.427 | 0.820 | 0.824 | 0.902 | 0.826 |
| 99430_at   | 0.396 | 0.917 | 0.873 | 0.957 | 0.896 |
| 99431_at   | 0.344 | 0.827 | 0.804 | 0.913 | 0.845 |
| 99432_at   | 0.345 | 0.889 | 0.829 | 0.918 | 0.827 |
| 99433_at   | 0.363 | 0.894 | 0.914 | 0.960 | 0.926 |
| 99434_at   | 0.128 | 0.857 | 0.987 | 0.916 | 0.991 |
| 99435_at   | 0.346 | 0.904 | 0.916 | 0.974 | 0.967 |
| 99436_at   | 0.420 | 0.858 | 0.825 | 0.935 | 0.807 |
| 99437_at   | 0.338 | 0.904 | 0.867 | 0.972 | 0.951 |
| 99438_at   | 0.346 | 0.959 | 0.826 | 0.932 | 0.880 |
| 99439_at   | 0.255 | 0.879 | 0.790 | 0.958 | 0.848 |
| 99440_at   | 0.364 | 1.352 | 1.219 | 1.156 | 1.220 |
| 99441_at   | 0.454 | 1.157 | 1.193 | 1.129 | 1.173 |
| 99442_at   | 0.386 | 0.853 | 0.793 | 0.917 | 0.857 |
| 99444_at   | 0.062 | 1.029 | 0.969 | 1.079 | 0.860 |

|            |       |       |       |       |       |
|------------|-------|-------|-------|-------|-------|
| 99445_at   | 0.303 | 1.216 | 1.194 | 1.010 | 1.261 |
| 99446_at   | 0.022 | 0.771 | 1.116 | 0.710 | 0.862 |
| 99447_at   | 0.382 | 0.935 | 0.909 | 0.911 | 0.894 |
| 99448_at   | 0.398 | 1.067 | 0.991 | 1.064 | 1.084 |
| 99449_at   | 0.341 | 0.905 | 0.857 | 0.966 | 0.883 |
| 99450_at   | 0.386 | 0.841 | 0.844 | 0.876 | 0.869 |
| 99451_at   | 0.348 | 0.974 | 0.927 | 0.968 | 0.922 |
| 99452_at   | 0.099 | 1.090 | 1.007 | 1.042 | 1.001 |
| 99453_at   | 0.369 | 1.005 | 0.932 | 0.950 | 0.976 |
| 99455_s_at | 0.452 | 0.899 | 0.831 | 0.901 | 0.870 |
| 99456_at   | 0.495 | 0.857 | 0.835 | 0.865 | 0.854 |
| 99457_at   | 0.120 | 1.250 | 1.814 | 1.150 | 1.763 |
| 99458_i_at | 0.042 | 1.480 | 1.352 | 0.972 | 1.299 |
| 99459_f_at | 0.291 | 1.141 | 1.089 | 1.084 | 1.054 |
| 99460_at   | 0.142 | 0.965 | 0.917 | 0.921 | 0.987 |
| 99461_at   | 0.089 | 0.951 | 1.266 | 0.948 | 1.145 |
| 99462_at   | 0.279 | 1.184 | 1.231 | 0.966 | 1.202 |
| 99463_at   | 0.206 | 0.902 | 0.829 | 0.940 | 0.907 |
| 99464_at   | 0.290 | 1.207 | 1.209 | 1.036 | 1.227 |
| 99465_at   | 0.246 | 1.263 | 1.169 | 1.094 | 1.116 |
| 99466_at   | 0.256 | 0.837 | 0.771 | 0.904 | 0.821 |
| 99467_at   | 0.417 | 1.264 | 1.323 | 1.112 | 1.230 |
| 99469_at   | 0.263 | 1.157 | 1.037 | 1.119 | 1.045 |
| 99471_at   | 0.505 | 1.018 | 1.019 | 1.003 | 1.017 |
| 99472_at   | 0.265 | 0.807 | 0.773 | 0.901 | 0.787 |
| 99473_at   | 0.438 | 0.874 | 0.912 | 0.919 | 0.881 |
| 99474_at   | 0.456 | 0.882 | 0.849 | 0.877 | 0.839 |
| 99475_at   | 0.470 | 1.286 | 1.352 | 1.204 | 1.271 |
| 99476_at   | 0.375 | 1.098 | 1.064 | 1.134 | 1.081 |
| 99477_at   | 0.270 | 0.833 | 0.883 | 0.950 | 0.828 |
| 99478_at   | 0.091 | 0.772 | 0.903 | 0.772 | 0.799 |
| 99479_at   | 0.239 | 0.905 | 0.793 | 1.263 | 0.824 |
| 99481_at   | 0.136 | 1.168 | 1.016 | 1.232 | 0.933 |
| 99485_at   | 0.422 | 1.122 | 1.189 | 1.116 | 1.169 |
| 99486_at   | 0.342 | 1.164 | 1.147 | 1.080 | 1.112 |
| 99488_at   | 0.369 | 0.870 | 0.896 | 0.902 | 0.890 |
| 99489_at   | 0.114 | 0.923 | 0.728 | 0.981 | 0.787 |
| 99490_at   | 0.194 | 1.032 | 1.012 | 1.053 | 1.088 |
| 99491_at   | 0.308 | 1.218 | 1.245 | 1.000 | 1.188 |
| 99492_at   | 0.201 | 0.856 | 0.802 | 0.981 | 0.845 |
| 99493_at   | 0.355 | 1.112 | 1.055 | 1.024 | 1.068 |
| 99494_at   | 0.393 | 0.975 | 0.923 | 0.932 | 0.916 |
| 99497_at   | 0.271 | 0.946 | 0.976 | 1.026 | 0.965 |
| 99498_at   | 0.235 | 1.045 | 0.982 | 1.117 | 1.057 |
| 99499_at   | 0.415 | 0.972 | 1.016 | 1.031 | 0.974 |
| 99500_at   | 0.264 | 1.450 | 1.467 | 1.076 | 1.407 |
| 99501_at   | 0.343 | 0.837 | 0.942 | 0.930 | 0.957 |

|            |       |       |       |       |       |
|------------|-------|-------|-------|-------|-------|
| 99502_at   | 0.342 | 1.191 | 1.151 | 1.086 | 1.235 |
| 99503_at   | 0.331 | 1.156 | 1.078 | 1.042 | 1.140 |
| 99504_at   | 0.432 | 0.907 | 0.890 | 0.932 | 0.918 |
| 99505_at   | 0.035 | 0.955 | 1.148 | 1.021 | 1.070 |
| 99506_at   | 0.183 | 1.107 | 0.976 | 1.013 | 1.015 |
| 99507_at   | 0.249 | 0.848 | 0.676 | 2.073 | 0.656 |
| 99508_at   | 0.346 | 0.904 | 0.801 | 0.905 | 0.851 |
| 99509_s_at | 0.265 | 1.051 | 1.245 | 1.064 | 1.116 |
| 99510_at   | 0.161 | 0.927 | 1.076 | 0.917 | 0.976 |
| 99511_at   | 0.361 | 0.922 | 0.928 | 0.983 | 0.961 |
| 99512_at   | 0.084 | 1.180 | 1.116 | 0.977 | 1.110 |
| 99513_at   | 0.291 | 1.168 | 1.222 | 1.148 | 1.138 |
| 99514_at   | 0.341 | 0.857 | 0.853 | 0.902 | 0.858 |
| 99515_at   | 0.119 | 0.911 | 0.927 | 1.034 | 0.879 |
| 99516_at   | 0.448 | 0.843 | 0.775 | 0.849 | 0.750 |
| 99517_at   | 0.380 | 0.904 | 0.911 | 0.958 | 0.950 |
| 99518_at   | 0.161 | 1.132 | 0.985 | 1.095 | 1.221 |
| 99521_at   | 0.330 | 0.904 | 0.851 | 0.883 | 0.901 |
| 99522_at   | 0.182 | 0.874 | 0.846 | 0.915 | 0.923 |
| 99523_at   | 0.337 | 0.909 | 0.861 | 0.975 | 0.929 |
| 99524_at   | 0.308 | 1.231 | 1.258 | 1.083 | 1.461 |
| 99525_at   | 0.397 | 0.995 | 0.963 | 1.030 | 1.034 |
| 99527_at   | 0.481 | 1.020 | 1.036 | 1.033 | 1.041 |
| 99528_at   | 0.332 | 0.966 | 0.984 | 0.993 | 1.082 |
| 99529_f_at | 0.408 | 0.971 | 0.986 | 0.982 | 1.035 |
| 99530_at   | 0.351 | 0.868 | 0.815 | 0.894 | 0.890 |
| 99531_at   | 0.441 | 0.852 | 0.798 | 0.883 | 0.799 |
| 99532_at   | 0.236 | 1.343 | 1.158 | 1.161 | 1.225 |
| 99534_at   | 0.494 | 0.932 | 0.912 | 0.979 | 0.902 |
| 99535_at   | 0.354 | 1.128 | 1.088 | 1.188 | 1.130 |
| 99536_at   | 0.321 | 0.928 | 0.874 | 0.986 | 0.921 |
| 99537_at   | 0.403 | 1.004 | 0.954 | 0.988 | 0.966 |
| 99541_at   | 0.159 | 0.926 | 0.962 | 0.917 | 1.033 |
| 99542_at   | 0.463 | 0.868 | 0.821 | 0.873 | 0.851 |
| 99543_s_at | 0.290 | 0.973 | 0.988 | 0.960 | 1.055 |
| 99544_at   | 0.127 | 0.967 | 0.948 | 0.895 | 1.013 |
| 99545_at   | 0.200 | 1.027 | 0.916 | 0.997 | 0.945 |
| 99546_at   | 0.069 | 1.022 | 1.284 | 0.944 | 1.077 |
| 99548_at   | 0.096 | 0.928 | 0.653 | 1.139 | 0.788 |
| 99549_at   | 0.341 | 0.859 | 1.037 | 0.997 | 1.164 |
| 99551_f_at | 0.470 | 0.835 | 0.808 | 0.868 | 0.849 |
| 99552_at   | 0.467 | 1.041 | 0.995 | 1.015 | 1.090 |
| 99553_f_at | 0.330 | 0.888 | 0.835 | 0.950 | 0.871 |
| 99555_at   | 0.286 | 0.961 | 0.918 | 0.980 | 0.976 |
| 99556_s_at | 0.377 | 0.861 | 0.793 | 0.921 | 0.842 |
| 99557_at   | 0.309 | 0.869 | 0.868 | 0.963 | 0.899 |
| 99558_at   | 0.273 | 1.076 | 1.035 | 0.957 | 1.094 |

|            |       |       |       |       |       |
|------------|-------|-------|-------|-------|-------|
| 99559_at   | 0.204 | 1.186 | 1.094 | 1.119 | 1.149 |
| 99561_f_at | 0.241 | 1.081 | 1.032 | 1.079 | 0.985 |
| 99562_at   | 0.091 | 1.185 | 1.420 | 1.129 | 1.364 |
| 99563_at   | 0.241 | 1.251 | 1.187 | 1.125 | 1.184 |
| 99564_at   | 0.184 | 0.928 | 1.069 | 0.995 | 1.018 |
| 99566_at   | 0.360 | 1.247 | 1.343 | 1.214 | 1.229 |
| 99567_at   | 0.179 | 1.001 | 0.972 | 0.992 | 0.931 |
| 99569_at   | 0.423 | 0.885 | 0.845 | 0.928 | 0.833 |
| 99570_s_at | 0.353 | 0.791 | 0.733 | 0.874 | 0.709 |
| 99571_at   | 0.063 | 1.119 | 0.911 | 1.114 | 1.194 |
| 99574_at   | 0.087 | 1.141 | 1.236 | 1.028 | 1.285 |
| 99575_at   | 0.370 | 1.144 | 1.169 | 1.116 | 1.150 |
| 99576_at   | 0.115 | 0.953 | 0.886 | 0.889 | 0.868 |
| 99577_at   | 0.239 | 1.291 | 1.176 | 0.955 | 1.307 |
| 99578_at   | 0.070 | 1.003 | 1.250 | 0.950 | 1.256 |
| 99579_at   | 0.350 | 1.119 | 1.221 | 1.041 | 1.217 |
| 99580_s_at | 0.404 | 0.975 | 0.972 | 1.008 | 0.974 |
| 99581_at   | 0.241 | 1.020 | 1.182 | 0.971 | 1.161 |
| 99582_at   | 0.245 | 1.392 | 1.299 | 1.119 | 1.299 |
| 99583_at   | 0.207 | 1.028 | 1.021 | 1.006 | 0.955 |
| 99584_at   | 0.390 | 1.039 | 1.119 | 1.050 | 1.085 |
| 99585_at   | 0.445 | 0.944 | 0.885 | 0.973 | 0.921 |
| 99586_at   | 0.330 | 1.065 | 1.009 | 1.026 | 1.039 |
| 99587_at   | 0.295 | 1.119 | 1.069 | 1.065 | 1.067 |
| 99589_f_at | 0.303 | 0.850 | 0.827 | 0.922 | 0.838 |
| 99590_at   | 0.281 | 1.042 | 1.050 | 0.951 | 1.072 |
| 99591_i_at | 0.459 | 0.858 | 0.839 | 0.872 | 0.797 |
| 99592_f_at | 0.075 | 1.008 | 0.958 | 0.905 | 0.965 |
| 99593_at   | 0.341 | 0.994 | 1.032 | 1.065 | 1.096 |
| 99594_at   | 0.441 | 1.098 | 1.158 | 1.040 | 1.112 |
| 99595_at   | 0.193 | 1.028 | 0.996 | 1.074 | 0.974 |
| 99596_f_at | 0.191 | 1.097 | 1.029 | 1.030 | 0.975 |
| 99597_at   | 0.374 | 0.907 | 0.832 | 0.950 | 0.863 |
| 99598_g_at | 0.283 | 1.016 | 1.027 | 1.061 | 0.928 |
| 99599_s_at | 0.227 | 1.161 | 1.034 | 1.125 | 1.006 |
| 99600_at   | 0.212 | 1.083 | 0.973 | 0.994 | 0.923 |
| 99602_at   | 0.232 | 1.029 | 0.949 | 1.028 | 1.233 |
| 99603_g_at | 0.196 | 1.087 | 0.937 | 0.961 | 1.234 |
| 99604_at   | 0.502 | 1.185 | 1.217 | 1.167 | 1.230 |
| 99605_at   | 0.480 | 0.841 | 0.785 | 0.843 | 0.790 |
| 99606_at   | 0.302 | 1.027 | 0.987 | 1.001 | 0.978 |
| 99607_at   | 0.341 | 1.158 | 1.072 | 1.073 | 1.264 |
| 99608_at   | 0.244 | 0.904 | 0.841 | 0.899 | 0.932 |
| 99609_at   | 0.370 | 0.898 | 0.901 | 0.905 | 0.927 |
| 99610_at   | 0.228 | 1.140 | 1.039 | 1.041 | 1.069 |
| 99613_at   | 0.249 | 1.079 | 0.990 | 1.016 | 1.005 |
| 99615_at   | 0.283 | 0.972 | 0.886 | 0.962 | 0.968 |

|            |       |       |       |       |       |
|------------|-------|-------|-------|-------|-------|
| 99616_s_at | 0.131 | 1.031 | 1.016 | 0.946 | 1.046 |
| 99617_at   | 0.320 | 1.060 | 1.025 | 1.003 | 0.984 |
| 99618_at   | 0.472 | 1.024 | 1.086 | 0.991 | 1.060 |
| 99619_at   | 0.454 | 1.009 | 1.024 | 1.012 | 1.038 |
| 99620_at   | 0.393 | 1.009 | 1.002 | 0.885 | 1.035 |
| 99621_s_at | 0.354 | 1.092 | 1.178 | 1.041 | 1.068 |
| 99622_at   | 0.362 | 1.316 | 1.347 | 1.081 | 1.205 |
| 99623_s_at | 0.314 | 1.003 | 1.055 | 1.023 | 0.997 |
| 99624_at   | 0.443 | 1.165 | 1.139 | 1.073 | 1.221 |
| 99626_i_at | 0.382 | 0.898 | 0.870 | 0.929 | 0.906 |
| 99627_r_at | 0.484 | 0.776 | 0.733 | 0.829 | 0.763 |
| 99628_at   | 0.178 | 1.375 | 1.191 | 1.097 | 1.174 |
| 99629_at   | 0.323 | 1.197 | 1.201 | 1.038 | 1.218 |
| 99630_at   | 0.320 | 0.918 | 1.033 | 0.954 | 0.989 |
| 99631_f_at | 0.325 | 1.068 | 1.084 | 1.073 | 1.033 |
| 99632_at   | 0.238 | 1.146 | 1.226 | 1.037 | 1.285 |
| 99633_at   | 0.129 | 1.284 | 1.248 | 1.068 | 1.150 |
| 99635_at   | 0.249 | 0.934 | 0.876 | 0.917 | 0.968 |
| 99636_at   | 0.427 | 0.990 | 0.982 | 1.001 | 0.965 |
| 99637_at   | 0.292 | 0.975 | 1.076 | 1.265 | 0.917 |
| 99638_at   | 0.185 | 0.910 | 0.941 | 1.010 | 0.922 |
| 99639_at   | 0.147 | 1.018 | 0.954 | 1.008 | 1.001 |
| 99640_at   | 0.260 | 1.048 | 1.000 | 1.014 | 1.119 |
| 99641_at   | 0.101 | 1.043 | 0.918 | 0.955 | 0.922 |
| 99642_i_at | 0.419 | 1.012 | 0.926 | 0.980 | 0.964 |
| 99643_f_at | 0.400 | 1.179 | 1.077 | 1.094 | 1.040 |
| 99644_at   | 0.267 | 1.051 | 0.985 | 1.007 | 0.994 |
| 99645_at   | 0.302 | 1.230 | 1.126 | 1.141 | 1.139 |
| 99646_at   | 0.332 | 0.882 | 0.805 | 0.882 | 0.861 |
| 99647_at   | 0.402 | 0.990 | 1.001 | 0.967 | 0.998 |
| 99648_at   | 0.323 | 0.868 | 0.812 | 0.912 | 0.831 |
| 99649_at   | 0.095 | 0.964 | 1.070 | 1.053 | 0.907 |
| 99650_at   | 0.181 | 1.191 | 1.197 | 1.012 | 1.148 |
| 99651_at   | 0.260 | 1.072 | 1.076 | 1.014 | 1.007 |
| 99652_at   | 0.303 | 0.968 | 0.927 | 0.997 | 0.948 |
| 99653_at   | 0.305 | 0.950 | 0.952 | 0.939 | 0.940 |
| 99654_s_at | 0.351 | 0.885 | 0.786 | 1.088 | 0.850 |
| 99655_at   | 0.303 | 1.136 | 1.142 | 0.984 | 1.146 |
| 99656_at   | 0.228 | 1.001 | 1.017 | 1.067 | 1.045 |
| 99657_at   | 0.505 | 0.870 | 0.844 | 0.889 | 0.836 |
| 99658_f_at | 0.357 | 1.047 | 0.983 | 1.042 | 0.985 |
| 99659_r_at | 0.401 | 0.927 | 0.888 | 0.966 | 0.854 |
| 99660_f_at | 0.445 | 1.054 | 1.107 | 1.040 | 1.123 |
| 99661_r_at | 0.273 | 0.950 | 0.942 | 0.959 | 1.045 |
| 99662_at   | 0.211 | 1.019 | 1.019 | 1.001 | 0.947 |
| 99663_g_at | 0.081 | 1.023 | 0.948 | 0.950 | 0.954 |
| 99664_at   | 0.443 | 0.771 | 0.795 | 0.830 | 0.712 |

|            |       |       |       |       |       |
|------------|-------|-------|-------|-------|-------|
| 99665_at   | 0.320 | 1.005 | 0.962 | 0.898 | 1.050 |
| 99666_at   | 0.376 | 1.016 | 1.147 | 1.210 | 1.086 |
| 99667_at   | 0.425 | 0.870 | 0.783 | 0.962 | 0.832 |
| 99668_at   | 0.454 | 1.014 | 1.022 | 0.976 | 1.042 |
| 99669_at   | 0.139 | 1.104 | 1.777 | 1.170 | 1.417 |
| 99670_at   | 0.328 | 1.017 | 1.108 | 1.014 | 1.130 |
| 99671_at   | 0.314 | 0.446 | 0.357 | 1.219 | 0.408 |
| 99672_at   | 0.195 | 0.986 | 1.081 | 0.989 | 1.130 |
| 99674_at   | 0.343 | 1.116 | 1.049 | 1.004 | 1.090 |
| 99675_at   | 0.505 | 0.922 | 0.937 | 0.929 | 0.935 |
| 99677_at   | 0.329 | 0.902 | 0.906 | 1.001 | 0.925 |
| 99678_f_at | 0.255 | 1.033 | 1.077 | 1.032 | 1.073 |
| 99681_at   | 0.210 | 0.939 | 0.762 | 0.905 | 0.880 |
| 99699_at   | 0.421 | 0.881 | 0.890 | 0.923 | 0.895 |
| 99700_at   | 0.357 | 0.960 | 0.896 | 0.950 | 0.896 |
| 99701_f_at | 0.051 | 0.827 | 2.024 | 0.993 | 0.861 |
| 99702_at   | 0.477 | 0.806 | 0.811 | 0.856 | 0.819 |
| 99708_at   | 0.454 | 0.848 | 0.786 | 0.868 | 0.826 |
| 99756_at   | 0.318 | 0.927 | 0.822 | 0.981 | 0.863 |
| 99776_at   | 0.399 | 0.936 | 0.867 | 0.927 | 0.917 |
| 99777_s_at | 0.201 | 1.014 | 0.948 | 0.958 | 0.980 |
| 99778_at   | 0.290 | 0.957 | 0.981 | 0.928 | 0.999 |
| 99779_at   | 0.291 | 0.939 | 0.892 | 0.969 | 0.951 |
| 99798_at   | 0.354 | 0.869 | 0.839 | 0.859 | 0.894 |
| 99799_at   | 0.212 | 0.892 | 1.073 | 0.898 | 0.962 |
| 99800_at   | 0.363 | 0.790 | 0.792 | 0.877 | 0.820 |
| 99801_at   | 0.499 | 0.879 | 0.860 | 0.903 | 0.873 |
| 99802_at   | 0.495 | 0.838 | 0.795 | 0.866 | 0.817 |
| 99803_at   | 0.178 | 0.835 | 0.820 | 0.926 | 0.844 |
| 99804_at   | 0.403 | 0.849 | 0.842 | 0.905 | 0.883 |
| 99805_at   | 0.424 | 0.867 | 0.807 | 0.922 | 0.833 |
| 99806_at   | 0.191 | 0.950 | 0.927 | 1.094 | 0.994 |
| 99807_r_at | 0.510 | 0.887 | 0.884 | 0.901 | 0.881 |
| 99808_at   | 0.483 | 0.913 | 0.857 | 0.940 | 0.887 |
| 99809_at   | 0.305 | 0.811 | 0.814 | 0.930 | 0.807 |
| 99810_at   | 0.091 | 0.835 | 1.064 | 0.880 | 0.772 |
| 99811_at   | 0.308 | 0.970 | 0.927 | 0.987 | 0.959 |
| 99812_at   | 0.368 | 0.876 | 0.862 | 0.926 | 0.915 |
| 99813_g_at | 0.367 | 0.977 | 0.996 | 1.009 | 0.967 |
| 99814_at   | 0.431 | 0.911 | 0.868 | 0.973 | 0.890 |
| 99815_at   | 0.322 | 0.861 | 0.823 | 0.922 | 0.837 |
| 99816_at   | 0.278 | 1.350 | 1.192 | 1.172 | 1.181 |
| 99817_at   | 0.189 | 0.883 | 0.871 | 0.967 | 0.890 |
| 99818_at   | 0.308 | 0.955 | 0.934 | 1.003 | 1.030 |
| 99819_at   | 0.348 | 0.884 | 0.854 | 0.937 | 0.908 |
| 99820_f_at | 0.336 | 0.924 | 0.872 | 0.890 | 0.805 |
| 99821_at   | 0.272 | 0.947 | 0.865 | 0.918 | 0.909 |

|            |       |       |       |       |       |
|------------|-------|-------|-------|-------|-------|
| 99823_r_at | 0.274 | 0.859 | 0.815 | 0.924 | 0.902 |
| 99824_at   | 0.365 | 0.995 | 0.992 | 0.972 | 0.966 |
| 99825_at   | 0.407 | 0.909 | 0.860 | 0.933 | 0.905 |
| 99826_at   | 0.265 | 0.937 | 0.939 | 0.940 | 0.950 |
| 99827_at   | 0.219 | 0.936 | 0.877 | 1.010 | 0.938 |
| 99828_at   | 0.220 | 1.096 | 1.113 | 1.010 | 1.106 |
| 99829_at   | 0.444 | 0.859 | 0.796 | 0.901 | 0.817 |
| 99830_at   | 0.456 | 0.967 | 0.932 | 1.008 | 0.956 |
| 99831_at   | 0.352 | 0.912 | 0.905 | 0.958 | 0.905 |
| 99832_at   | 0.329 | 0.953 | 0.965 | 1.057 | 0.947 |
| 99833_at   | 0.006 | 0.930 | 1.631 | 0.950 | 1.006 |
| 99834_at   | 0.402 | 0.881 | 0.855 | 0.926 | 0.895 |
| 99835_at   | 0.350 | 0.984 | 0.954 | 1.009 | 0.927 |
| 99836_at   | 0.351 | 0.895 | 0.883 | 0.971 | 0.931 |
| 99837_at   | 0.427 | 0.949 | 0.906 | 0.966 | 0.903 |
| 99838_at   | 0.188 | 0.871 | 0.903 | 0.896 | 0.926 |
| 99839_at   | 0.392 | 0.915 | 0.861 | 0.949 | 0.910 |
| 99840_at   | 0.345 | 0.903 | 0.842 | 0.899 | 0.881 |
| 99841_at   | 0.367 | 0.835 | 0.825 | 0.825 | 0.758 |
| 99842_at   | 0.246 | 0.913 | 0.874 | 0.941 | 0.956 |
| 99843_at   | 0.458 | 0.863 | 0.822 | 0.914 | 0.851 |
| 99844_at   | 0.496 | 0.893 | 0.837 | 0.924 | 0.866 |
| 99845_at   | 0.345 | 0.893 | 0.816 | 0.859 | 0.851 |
| 99846_at   | 0.143 | 1.065 | 0.931 | 0.985 | 0.898 |
| 99847_at   | 0.204 | 0.865 | 0.901 | 0.947 | 0.947 |
| 99848_at   | 0.370 | 0.769 | 0.750 | 0.795 | 0.697 |
| 99849_at   | 0.189 | 1.128 | 1.137 | 1.059 | 1.002 |
| 99850_at   | 0.325 | 0.942 | 0.976 | 1.042 | 0.906 |
| 99851_at   | 0.147 | 1.061 | 0.937 | 0.940 | 1.046 |
| 99854_at   | 0.277 | 0.939 | 0.930 | 0.913 | 0.959 |
| 99855_at   | 0.097 | 1.087 | 1.025 | 0.975 | 1.098 |
| 99856_r_at | 0.488 | 1.036 | 1.029 | 0.976 | 1.037 |
| 99860_at   | 0.443 | 0.927 | 0.879 | 0.916 | 0.887 |
| 99861_at   | 0.077 | 0.876 | 0.825 | 0.997 | 0.877 |
| 99862_at   | 0.401 | 0.901 | 0.840 | 0.947 | 0.867 |
| 99863_at   | 0.509 | 0.946 | 0.944 | 0.953 | 0.938 |
| 99864_at   | 0.193 | 1.042 | 1.090 | 1.025 | 0.986 |
| 99865_at   | 0.104 | 0.950 | 0.863 | 0.951 | 1.021 |
| 99866_at   | 0.298 | 0.960 | 0.881 | 0.899 | 0.939 |
| 99867_at   | 0.458 | 0.813 | 0.722 | 0.861 | 0.787 |
| 99868_at   | 0.361 | 0.976 | 0.963 | 0.946 | 0.973 |
| 99869_at   | 0.315 | 0.837 | 0.832 | 0.820 | 0.789 |
| 99870_at   | 0.211 | 0.993 | 0.916 | 0.988 | 0.940 |
| 99871_f_at | 0.254 | 0.882 | 0.850 | 0.942 | 0.870 |
| 99872_s_at | 0.227 | 0.957 | 1.026 | 0.951 | 1.083 |
| 99873_at   | 0.309 | 0.900 | 0.833 | 0.940 | 0.863 |
| 99874_at   | 0.255 | 0.959 | 0.911 | 0.919 | 0.943 |

|            |       |       |       |       |       |
|------------|-------|-------|-------|-------|-------|
| 99875_at   | 0.261 | 0.854 | 0.813 | 0.947 | 0.838 |
| 99876_at   | 0.172 | 0.854 | 0.972 | 0.939 | 1.027 |
| 99878_at   | 0.502 | 0.801 | 0.782 | 0.814 | 0.771 |
| 99880_at   | 0.211 | 0.928 | 0.929 | 1.035 | 0.900 |
| 99881_at   | 0.390 | 0.999 | 0.928 | 0.989 | 0.977 |
| 99882_at   | 0.348 | 0.875 | 0.898 | 0.981 | 0.924 |
| 99883_g_at | 0.328 | 0.843 | 0.836 | 0.957 | 0.938 |
| 99884_at   | 0.401 | 0.953 | 0.942 | 1.006 | 0.952 |
| 99885_at   | 0.431 | 0.876 | 0.894 | 0.903 | 0.879 |
| 99886_at   | 0.288 | 0.903 | 0.870 | 0.944 | 0.911 |
| 99887_at   | 0.387 | 0.904 | 0.891 | 0.969 | 0.916 |
| 99888_at   | 0.405 | 0.843 | 0.781 | 0.887 | 0.781 |
| 99889_at   | 0.423 | 0.926 | 0.928 | 1.014 | 0.909 |
| 99890_at   | 0.308 | 0.803 | 0.801 | 0.899 | 0.868 |
| 99891_at   | 0.440 | 0.915 | 0.846 | 0.939 | 0.891 |
| 99892_at   | 0.458 | 0.950 | 0.921 | 0.987 | 0.943 |
| 99893_at   | 0.285 | 0.960 | 0.904 | 0.981 | 0.955 |
| 99894_at   | 0.401 | 0.947 | 0.919 | 1.009 | 0.962 |
| 99895_at   | 0.496 | 0.859 | 0.836 | 0.873 | 0.854 |
| 99896_at   | 0.233 | 0.844 | 0.786 | 0.917 | 0.822 |
| 99897_at   | 0.458 | 0.889 | 0.846 | 0.884 | 0.882 |
| 99898_at   | 0.296 | 0.856 | 0.828 | 0.938 | 0.852 |
| 99899_at   | 0.495 | 0.873 | 0.871 | 0.913 | 0.866 |
| 99900_at   | 0.200 | 0.871 | 0.825 | 0.974 | 0.882 |
| 99901_at   | 0.150 | 0.668 | 0.687 | 0.978 | 0.772 |
| 99902_at   | 0.247 | 1.024 | 0.991 | 0.980 | 0.963 |
| 99903_at   | 0.383 | 0.826 | 0.865 | 0.865 | 0.823 |
| 99904_at   | 0.465 | 0.880 | 0.873 | 0.883 | 0.827 |
| 99905_at   | 0.139 | 0.863 | 0.780 | 0.872 | 0.872 |
| 99906_at   | 0.408 | 0.985 | 0.923 | 0.959 | 0.949 |
| 99907_at   | 0.392 | 0.947 | 0.914 | 0.978 | 0.965 |
| 99908_at   | 0.419 | 0.872 | 0.838 | 0.941 | 0.851 |
| 99909_at   | 0.226 | 1.005 | 0.925 | 0.955 | 1.010 |
| 99910_at   | 0.401 | 0.891 | 0.814 | 0.906 | 0.837 |
| 99911_at   | 0.478 | 0.976 | 0.917 | 1.017 | 0.925 |
| 99912_at   | 0.495 | 0.916 | 0.902 | 0.946 | 0.916 |
| 99913_at   | 0.074 | 1.108 | 1.323 | 1.228 | 1.036 |
| 99914_at   | 0.414 | 0.876 | 0.819 | 0.947 | 0.894 |
| 99915_at   | 0.436 | 0.970 | 0.998 | 0.999 | 1.004 |
| 99916_at   | 0.281 | 0.842 | 0.918 | 0.957 | 0.993 |
| 99917_at   | 0.149 | 1.065 | 1.308 | 1.076 | 1.229 |
| 99920_at   | 0.407 | 1.015 | 0.987 | 0.969 | 1.021 |
| 99922_at   | 0.106 | 0.951 | 0.907 | 1.015 | 0.903 |
| 99923_at   | 0.235 | 1.024 | 0.960 | 0.891 | 1.068 |
| 99924_at   | 0.275 | 0.994 | 1.036 | 1.078 | 1.007 |
| 99925_f_at | 0.444 | 0.993 | 0.955 | 1.001 | 0.970 |
| 99926_at   | 0.051 | 1.270 | 2.397 | 1.361 | 1.113 |



|            |       |       |       |       |       |
|------------|-------|-------|-------|-------|-------|
| 99927_at   | 0.126 | 0.981 | 1.185 | 0.976 | 0.966 |
| 99928_at   | 0.298 | 0.964 | 1.010 | 0.984 | 0.945 |
| 99929_at   | 0.290 | 1.072 | 1.020 | 0.976 | 1.077 |
| 99930_s_at | 0.496 | 1.212 | 1.199 | 1.169 | 1.257 |
| 99931_at   | 0.274 | 1.100 | 0.929 | 1.072 | 0.988 |
| 99932_at   | 0.463 | 0.921 | 0.875 | 0.926 | 0.871 |
| 99933_at   | 0.093 | 1.014 | 0.948 | 1.110 | 0.879 |
| 99934_at   | 0.266 | 0.998 | 0.935 | 0.970 | 0.932 |
| 99935_at   | 0.203 | 1.192 | 1.110 | 1.021 | 1.139 |
| 99936_at   | 0.241 | 1.316 | 1.201 | 1.084 | 1.264 |
| 99937_at   | 0.176 | 1.487 | 1.367 | 1.110 | 1.160 |
| 99938_at   | 0.110 | 0.966 | 0.878 | 1.017 | 0.838 |
| 99939_at   | 0.291 | 0.859 | 0.821 | 0.975 | 0.851 |
| 99940_at   | 0.204 | 1.171 | 1.170 | 0.958 | 1.200 |
| 99941_at   | 0.474 | 0.898 | 0.861 | 0.943 | 0.890 |
| 99942_s_at | 0.155 | 0.770 | 0.791 | 1.089 | 0.660 |
| 99944_at   | 0.411 | 0.864 | 0.845 | 0.954 | 0.876 |
| 99945_at   | 0.207 | 0.836 | 0.971 | 0.872 | 0.836 |
| 99947_at   | 0.224 | 1.075 | 0.958 | 0.957 | 1.100 |
| 99948_at   | 0.379 | 0.929 | 0.880 | 0.974 | 0.934 |
| 99949_at   | 0.353 | 0.959 | 0.991 | 1.029 | 0.954 |
| 99950_at   | 0.328 | 0.990 | 0.962 | 0.950 | 0.999 |
| 99951_at   | 0.344 | 0.922 | 0.931 | 0.974 | 0.917 |
| 99952_at   | 0.137 | 1.551 | 2.401 | 1.213 | 1.745 |
| 99953_at   | 0.291 | 1.139 | 1.018 | 1.029 | 1.078 |
| 99954_at   | 0.287 | 0.896 | 0.917 | 0.974 | 0.889 |
| 99955_at   | 0.440 | 1.201 | 1.159 | 1.083 | 1.154 |
| 99956_at   | 0.354 | 1.194 | 1.202 | 1.037 | 1.093 |
| 99957_at   | 0.145 | 0.838 | 0.830 | 0.959 | 0.857 |
| 99958_at   | 0.120 | 0.906 | 1.918 | 1.004 | 0.969 |
| 99959_at   | 0.295 | 0.957 | 0.897 | 0.938 | 0.911 |
| 99960_at   | 0.257 | 0.976 | 0.983 | 1.033 | 1.029 |
| 99961_s_at | 0.241 | 1.329 | 1.193 | 1.153 | 1.182 |
| 99962_at   | 0.445 | 1.040 | 1.085 | 0.999 | 1.172 |
| 99963_at   | 0.270 | 1.056 | 0.969 | 1.017 | 1.033 |
| 99964_at   | 0.424 | 1.003 | 0.976 | 0.959 | 1.004 |
| 99965_at   | 0.322 | 0.851 | 0.827 | 0.945 | 0.909 |
| 99966_at   | 0.187 | 0.834 | 0.827 | 0.961 | 0.876 |
| 99970_at   | 0.143 | 1.299 | 1.101 | 1.170 | 1.053 |
| 99972_at   | 0.301 | 0.875 | 0.782 | 0.918 | 0.830 |
| 99973_s_at | 0.181 | 1.079 | 1.418 | 1.018 | 1.229 |
| 99974_at   | 0.189 | 1.441 | 2.251 | 1.077 | 1.748 |
| 99975_at   | 0.323 | 1.028 | 0.982 | 1.030 | 1.072 |
| 99977_at   | 0.301 | 0.903 | 0.957 | 0.942 | 0.970 |
| 99978_s_at | 0.443 | 1.210 | 1.226 | 1.060 | 1.195 |
| 99979_at   | 0.198 | 0.851 | 0.931 | 0.897 | 0.851 |
| 99980_at   | 0.344 | 0.831 | 0.796 | 0.820 | 0.851 |

|          |       |       |       |       |       |
|----------|-------|-------|-------|-------|-------|
| 99981_at | 0.322 | 0.884 | 0.869 | 0.976 | 0.879 |
| 99982_at | 0.452 | 0.954 | 0.947 | 0.981 | 0.914 |
| 99984_at | 0.251 | 0.735 | 0.808 | 0.831 | 0.800 |
| 99985_at | 0.367 | 1.065 | 1.104 | 0.989 | 1.060 |
| 99986_at | 0.219 | 0.788 | 0.864 | 0.930 | 0.872 |
| 99987_at | 0.307 | 0.922 | 0.904 | 1.009 | 0.922 |
| 99988_at | 0.407 | 1.004 | 1.002 | 1.018 | 1.020 |
| 99990_at | 0.321 | 1.186 | 1.155 | 1.076 | 1.125 |
| 99991_at | 0.283 | 1.003 | 1.110 | 1.013 | 1.122 |
| 99992_at | 0.308 | 0.973 | 0.914 | 0.918 | 0.959 |
| 99993_at | 0.051 | 1.094 | 1.170 | 1.238 | 0.948 |
| 99994_at | 0.284 | 0.843 | 0.734 | 1.597 | 0.718 |
| 99995_at | 0.389 | 0.863 | 0.843 | 0.905 | 0.887 |
| 99996_at | 0.322 | 0.851 | 0.835 | 0.961 | 0.855 |
| 99997_at | 0.505 | 0.922 | 0.892 | 0.935 | 0.901 |
| 99998_at | 0.334 | 0.912 | 0.912 | 0.989 | 0.929 |
| 99999_at | 0.452 | 1.207 | 1.138 | 1.074 | 1.177 |

Supplementary Table 4 Subset of Genes Up-regulated in TMA-induced Asthma

| Functional Classification | Gene Name                                                                                | Affymetrix Probe Set ID | FOLD TMA vs TMAc |
|---------------------------|------------------------------------------------------------------------------------------|-------------------------|------------------|
| Chemokines and Cytokines  | chemokine (C-C motif) ligand 8                                                           | 92459_at                | 2.73             |
|                           | chemokine (C-C motif) ligand 9                                                           | 104388_at               | 1.82             |
|                           | chemokine (C-C motif) ligand 6                                                           | 162198_f_at             | 1.69             |
|                           | chemokine (C-C motif) receptor 5                                                         | 161968_f_at             | 1.44             |
|                           | chemokine (C-C motif) receptor 1                                                         | 99413_at                | 1.28             |
|                           | chemokine (C-X-C motif) ligand 13                                                        | 102025_at               | 1.20             |
| Secretion and Remodeling  | Gob-5                                                                                    | 162287_r_at             | 18.47            |
|                           | Tff2 (Trefoil factor 2)                                                                  | 93302_at                | 2.07             |
|                           | MMP12 (Matrix metalloproteinase 12)                                                      | 95339_r_at              | 2.00             |
|                           | Muc5AC                                                                                   | 101803_at               | 1.23             |
|                           | syntaxin binding protein 2                                                               | 101398_at               | 1.22             |
| Cell Adhesion and Lectins | Chi3l3                                                                                   | 92694_at                | 5.20             |
|                           | AMCase                                                                                   | 160509_at               | 1.87             |
|                           | CD53                                                                                     | 94939_at                | 1.56             |
|                           | CD2                                                                                      | 95373_at                | 1.35             |
|                           | CD83                                                                                     | 103040_at               | 1.34             |
|                           | C-type (calcium dependent, carbohydrate recognition domain) lectin, superfamily member 6 | 92762_at                | 1.32             |
|                           | killer cell lectin-like receptor, subfamily A, member 3                                  | 93894_f_at              | 1.23             |

|                     |                                                                    |            |      |
|---------------------|--------------------------------------------------------------------|------------|------|
|                     | vascular cell adhesion molecule 1                                  | 92560_g_at | 1.20 |
| Complement          | complement component 1, q subcomponent, beta polypeptide           | 96020_at   | 1.57 |
|                     | complement component 1, q subcomponent, alpha polypeptide          | 98562_at   | 1.32 |
|                     | complement component 3                                             | 93497_at   | 1.27 |
|                     | complement component 1, q subcomponent, c polypeptide              | 92223_at   | 1.26 |
| Arginine Metabolism | glycine amidinotransferase (L-arginine:glycine amidinotransferase) | 96336_at   | 1.25 |
|                     | arginase type II                                                   | 98473_at   | 1.23 |
|                     | dimethylarginine dimethylaminohydrolase 2                          | 92887_at   | 1.20 |

---
